# Supplementary material for: In silico prediction of candidate gene targets for the management of African cassava whitefly (Bemisia tabaci, SSA1-SG1), a key vector of viruses causing cassava brown streak disease
Source: PeerJ. 2024 Feb 23;12:e16949. doi: 10.7717/peerj.16949 (PMC10896082; doi:10.7717/peerj.16949)
Supplement: Supplemental Information 2 [file peerj-12-16949-s002.docx]

***In silico* prediction of candidate gene targets for the management of African cassava whitefly (*Bemisia tabaci,* SSA1-SG1-UG), the key vector of Cassava brown streak disease causative viruses**

Tadeo Kaweesi1,2, 5*, John Colvin1, Lahcen Campbell3, Paul Visendi4, Gareth Maslen3, Titus Alicai5 and Susan E Seal1


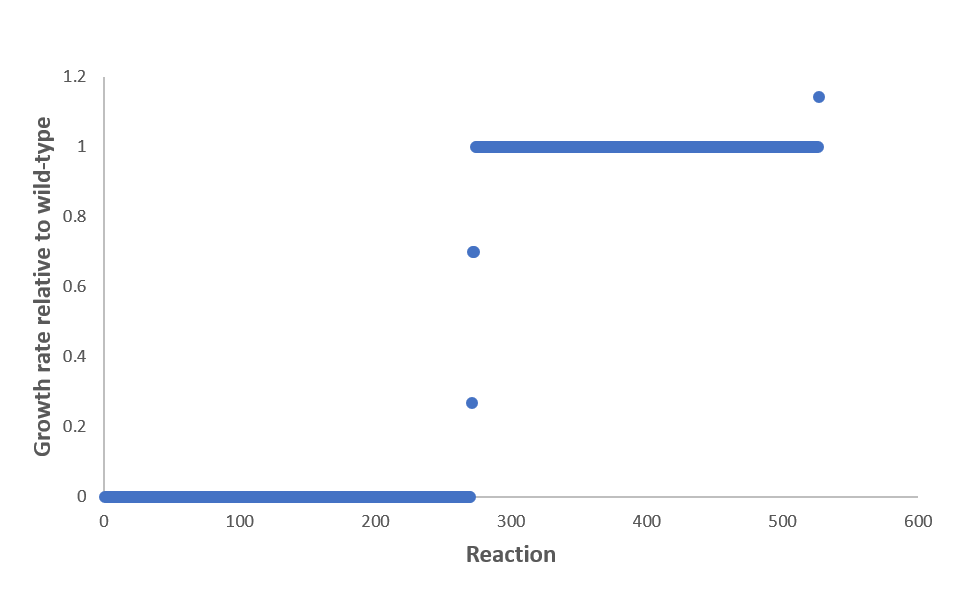


**Figure S1: Robustness of the metabolic network “SSA1-SG1_*Portiera*” iKT420 showing the effect of single reaction deletion on the growth rate of *B. tabaci* SSA1-SG1 and *Portiera* mutant relative to the wild-type, simulated using flux balance analysis. A total of 270 reaction deletions affected growth, therefore, were deemed indispensable/essential for the growth and survival of cassava *B. tabaci* SSA1-SG1**

**Table S1: Comparison of genomic features of *Portiera* genome from MEAM1, MED and SSA1-SG1**

| **Description** | **MEAM1** | **MED** | **SSA1-SG1** |
| --- | --- | --- | --- |
| Size (bp) | 352068 | 357461 | 347165 |
| GC content (%) | 26.2 | 26.1 | 26.2 |
| Number of coding sequences | 282 | 290 | 291 |
| Number of subsystems | 66 | 71 | 65 |
| Number of RNAs | 36 | 36 | 36 |
| Number of unique hypothetical proteins | 23* | 27** | 31*** |

*present in MEAM1 but missing in SSA1-SG1 **present in MED but missing in SSA1-SG1 ***present in SSA1-SG1 but missing in MEAM1

**Table S2: Missing protein/function in *Portiera* genome from MEAM1, MED and SSA1-SG1**

| **Unique protein/function** | **MEAM1** | **MED** | **SSA1-SG1** |
| --- | --- | --- | --- |
| 4-hydroxy-tetrahydrodipicolinate reductase (EC 1.17.1.8) | + | + | - |
| Inner membrane protein translocase component (YidC) | - | + | - |
| tRNA uridine 5-carboxymethylaminomethyl enzyme (GidA) | - | + | - |
| Cytochrome O ubiquinol oxidase subunit 1 | + | + | - |
| GTPase and tRNA-U34 5-formylation enzyme (TrmE) | - | + | - |
| SSU ribosomal protein S6p | - | + | - |


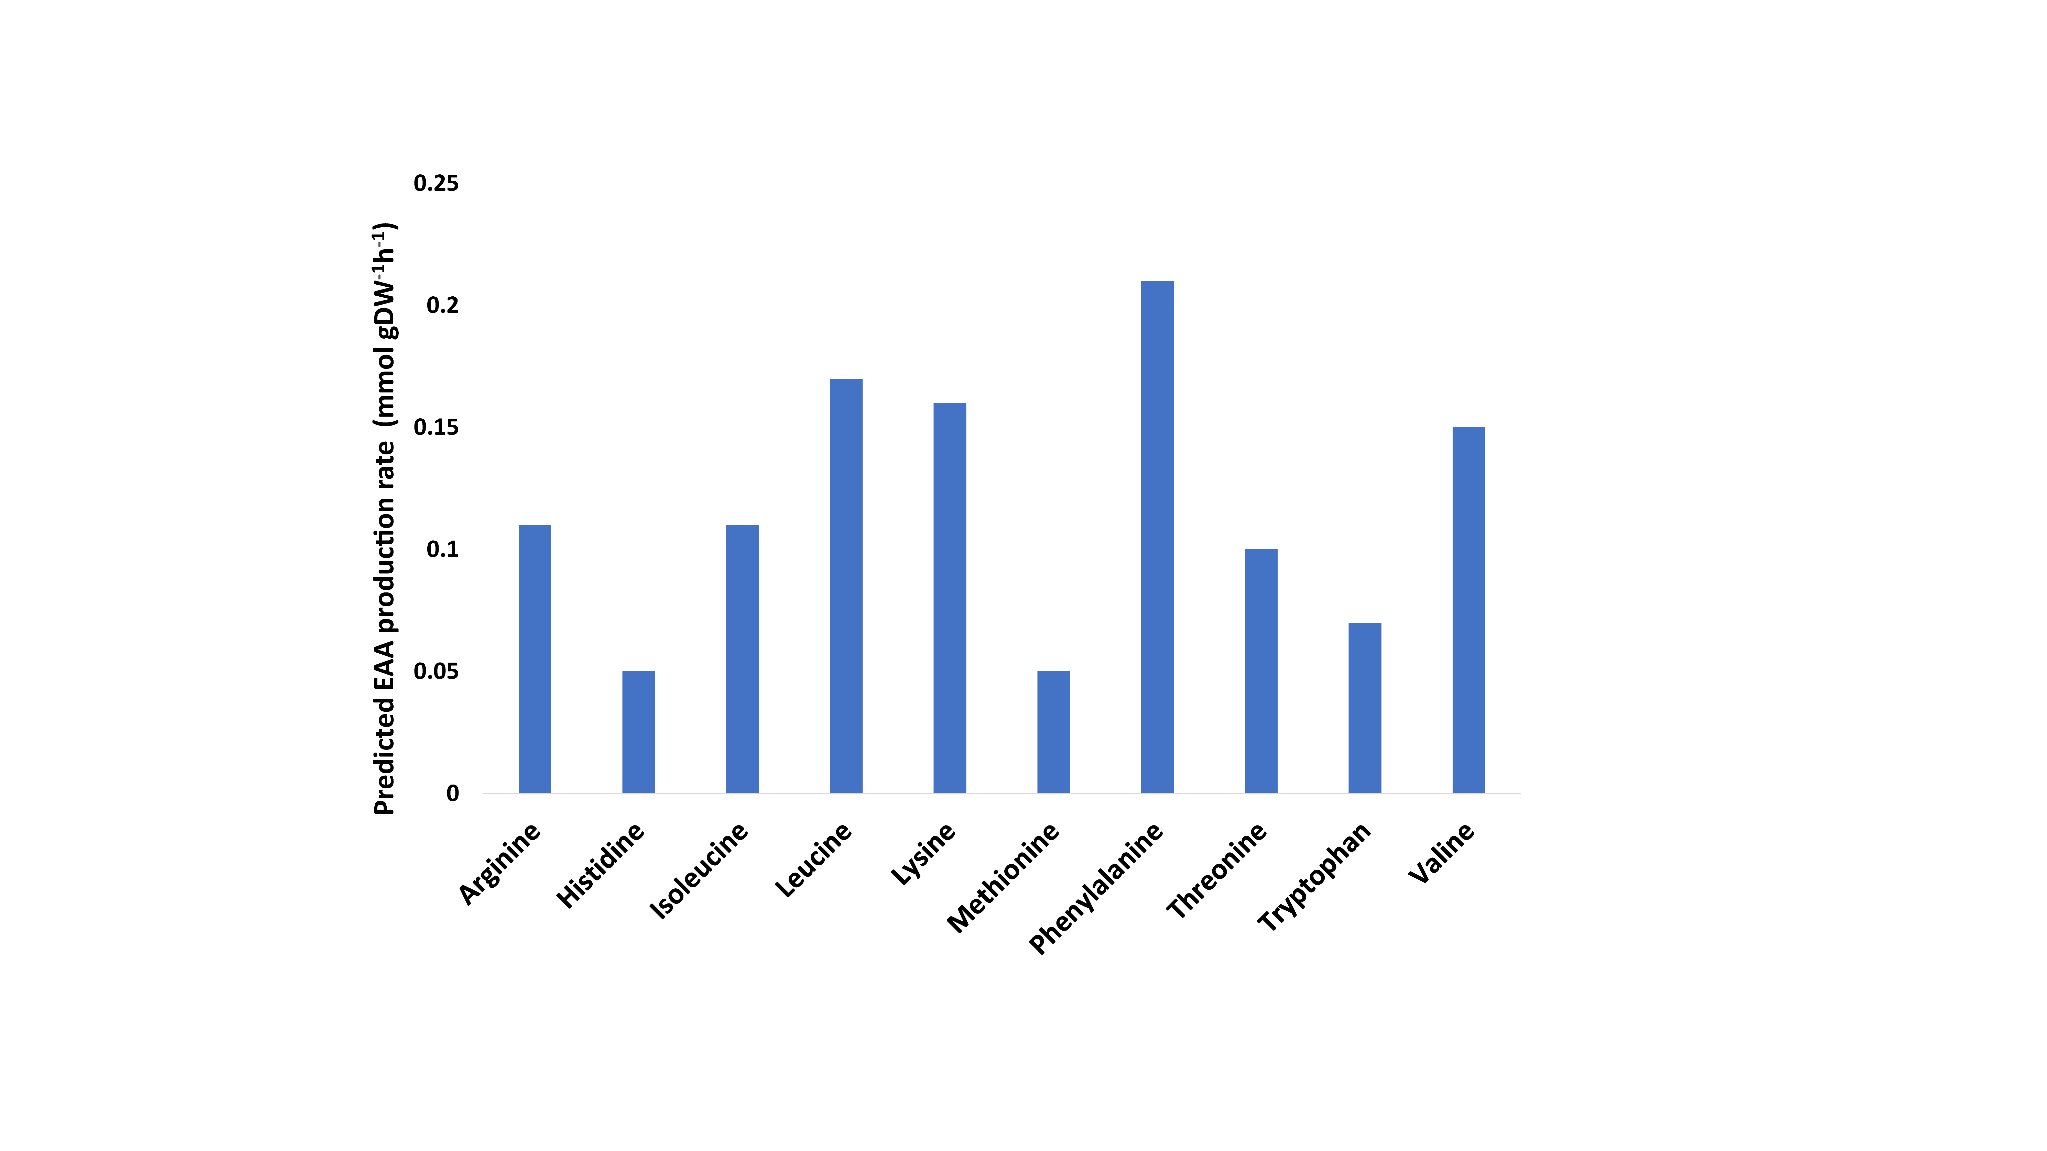


**Figure S2:** *In* *silico* prediction of production rates of essential amino acid of the two-compartment metabolic model of *B. tabaci* SSA1-SG1 and *Portiera.*

**Table S4: Comparison of genome-scale metabolic models of *B. tabaci* SSA1-SG1 and MEAM1**

| **Description** | ***B. tabaci* SSA1-SG1** | | |  | | ***B. tabaci* MEAM1** | | |
| --- | --- | --- | --- | --- | --- | --- | --- | --- |
|  | ***i*KT90** | ***i*KT330** | ***i*KT420**** | |  | ***i*NA94** | ***i*NA332** | ***i*NA774***** |
| Number of metabolic genes | 90 | 330 | 420 | |  | 94 | 332 | 774 |
| Number of intracellular reactions | 76 | 233 | 310 | |  | 76 | 236 | 774 |
| Number of metabolites | 150 | 251 | 402 | |  | 148 | 253 | 550 |
| Flux balance optimal solution (h-1) | 6.70 | 25.38 | 0.39 | |  | 12.02 | 26.55 | 0.20 |
| Total protein (mmol/gDw) |  |  | 6.20 | |  |  |  | 6.20 |
| Total cost for protein synthesis |  |  | 26.71 | |  |  |  | 26.71 |

** Two compartment model for *B. tabaci* SSA1-SG1 & Portiera *** Three-compartment (Ankrah *et al*., 2017)

**Table S5:List of essential reactions in a two-compartment metabolic model of SSA1-SG1**

| **Reaction Flux (mmol gDW-1 h-1)** | **Reaction Flux (mmol gDW-1 h-1)** |
| --- | --- |
| | SSA1_Por_OCBT | 0.111152 | | --- | --- | | SSA1_Por_METS | 0.046402 | | SSA1_Por_PRPPS | 0.116569 | | SSA1_Por_ATPPRT | 0.049133 | | SSA1_Por_PRATPP | 0.049133 | | SSA1_Por_PRAMPC | 0.049133 | | SSA1_Por_PRMICI | 0.049133 | | SSA1_Por_IG3PS | 0.049133 | | SSA1_Por_IGPDH | 0.049133 | | SSA1_Por_HSTPT | 0.049133 | | SSA1_Por_ASPK | 0.260487 | | SSA1_Por_ASAD | 0.260487 | | SSA1_Por_DHDPS | 0.159891 | | SSA1_Por_THDPS | 0.159891 | | SSA1_Por_SDPTA | 0.159891 | | SSA1_Por_SDPDS | 0.159891 | | SSA1_Por_HSD | 0.100596 | | SSA1_Por_HSK | 0.100596 | | SSA1_Por_THRS | 0.100596 | | SSA1_Por_DDPA | 0.277102 | | SSA1_Por_DHQS | 0.277102 | | SSA1_Por_DHQTi | 0.277102 | | SSA1_Por_SHK3Dr | 0.277102 | | SSA1_Por_SHKK | 0.277102 | | SSA1_Por_PSCVT | 0.277102 | | SSA1_Por_CHORS | 0.277102 | | SSA1_Por_ANS | 0.067436 | | SSA1_Por_ANPRT | 0.067436 | | SSA1_Por_PRAIi | 0.067436 | | SSA1_Por_IGPS | 0.067436 | | SSA1_Por_PPNDH | 0.209666 | | SSA1_Por_ACHBS | 0.113294 | | SSA1_Por_KARA2 | 0.113294 | | SSA1_Por_DHAD2 | 0.113294 | | SSA1_Por_ACLS | 0.310706 | | SSA1_Por_KARA1 | 0.310706 | | SSA1_Por_DHAD1 | 0.310706 | | SSA1_Por_IPPS | 0.16531 | | SSA1_Por_IPPMIb | 0.16531 | | SSA1_Por_IPPMIa | 0.16531 | | SSA1_Por_IPMD | 0.16531 | | | SSA1_Por_OMCDC | 0.16531 | | --- | --- | | SSA1_Por_PDH | 0.165312 | | SSA1_Por_AKGDH | 0.209024 | | SSA1_Por_ATPS4rpp | 3.89506 | | SSA1_Por_CYTBO3_4pp | 0.493353 | | SSA1_Por_NADH16pp | 0.493353 | | SSA1_Por_PSY1 | 4.93E-06 | | SSA1_Por_PSY2 | 4.93E-06 | | SSA1_Por_PDS1 | 4.93E-06 | | SSA1_Por_PDS2 | 4.93E-06 | | SSA1_Por_ZCAROTDH1 | 4.93E-06 | | SSA1_Por_ZCAROTDH2 | 2.47E-06 | | SSA1_Por_LCYBZC | 2.47E-06 | | SSA1_Por_HEMEOS | 2.47E-06 | | SSA1_Por_LIPOS | 2.47E-06 | | SSA1_Por_MTHFR2 | 0.046402 | | SSA1_Por_DPR | 2.91E-06 | | SSA1_Por_CLPNS160pp | 0.000318 | | SSA1_Por_DM_LIPOPB | 2.47E-06 | | SSA1_Por_DM_GLYC | 0.000318 | | SSA1_Por_O2tex | 0.246684 | | SSA1_Por_H2Otex | -2.83424 | | SSA1_Por_CO2tcy | 1.77185 | | SSA1_Por_UP_2DHP | 2.91E-06 | | SSA1_Por_UP_PYR | 0.992473 | | SSA1_Por_UP_2OBUT | 0.113294 | | SSA1_Por_UP_E4P | 0.277102 | | SSA1_Por_UP_PEP | 0.554204 | | SSA1_Por_UP_R5P | 0.116569 | | SSA1_Por_UP_PG160 | 0.000636 | | SSA1_Por_UP_GGDP | 9.87E-06 | | SSA1_Por_UP_FRDP | 2.47E-06 | | SSA1_Por_UP_OCTAPB | 2.47E-06 | | SSA1_Por_UP_PYDX5P | 2.47E-06 | | SSA1_Por_UP_THMPP | 2.47E-06 | | SSA1_Por_UP_FMNH2 | 2.47E-06 | | SSA1_Por_UP_THDP | 0.159891 | | SSA1_Por_UP_MLTHF | 0.046402 | | SSA1_Por_UP_COA | 0.049135 | | SSA1_Por_UP_PHEME | 2.47E-06 | | SSA1_Por_UP_NADP | 2.61E-05 | |

**Table S2: Continued**

| **Reaction Flux (mmol gDW-1 h-1)** | **Reaction Flux (mmol gDW-1 h-1)** |
| --- | --- |
| | SSA1_Por_UP_NADH | 0.000109 | | --- | --- | | SSA1_Por_UP_DATP | 0.001809 | | SSA1_Por_UP_DCTP | 0.000643 | | SSA1_Por_UP_DGTP | 0.000643 | | SSA1_Por_UP_DTTP | 0.001809 | | SSA1_Por_UP_ADP | 0.255983 | | SSA1_Por_UP_CTP | 0.006216 | | SSA1_Por_UP_GTP | 0.010014 | | SSA1_Por_UP_UTP | 0.006709 | | SSA1_Por_UP_AMET | 4.93E-06 | | SSA1_Por_UP_HCYS-L | 0.046402 | | SSA1_Por_UP_ORN | 0.111152 | | SSA1_Por_UP_ASN-L | 0.013436 | | SSA1_Por_UP_ASP-L | 0.356567 | | SSA1_Por_UP_CYS-L | 0.017419 | | SSA1_Por_UP_GLN-L | 0.235647 | | SSA1_Por_UP_GLY | 0.015866 | | SSA1_Por_UP_PRO-L | 0.007604 | | SSA1_Por_UP_SER-L | 0.083706 | | SSA1_Por_UP_TYR-L | 0.006368 | | SSA1_Por_UP_ARG-L | 0.010652 | | SSA1_Por_UP_HIS-L | 0.004045 | | SSA1_Por_UP_ILE-L | 0.021221 | | SSA1_Por_UP_LEU-L | 0.02112 | | SSA1_Por_UP_LYS-L | 0.021646 | | SSA1_Por_UP_PHE-L | 0.007694 | | SSA1_Por_UP_VAL-L | 0.01781 | | SSA1_Por_EF_SUCC | 0.159891 | | SSA1_Por_EF_G3P | 0.067436 | | SSA1_Por_EF_PPI | 0.283837 | | SSA1_Por_EF_PANT-R | 2.91E-06 | | SSA1_Por_EF_PHPYR | 0.209666 | | SSA1_Por_EF_3MOB | 0.145396 | | SSA1_Por_EF_3MOP | 0.113294 | | SSA1_Por_EF_4MOP | 0.16531 | | SSA1_Por_EF_SUCCOA | 0.049133 | | SSA1_Por_EF_DAD-5 | 4.93E-06 | | SSA1_Por_EF_AMP | 0.198622 | | SSA1_Por_EF_THF | 0.046402 | | SSA1_Por_EF_AICAR | 0.049133 | | SSA1_Por_EF_23DHDP | 0.159891 | | | SSA1_Por_EF_26DAP-LL | | 0.159891 | | --- | --- | --- | | SSA1_Por_EF_ARGSUC | | 0.082103 | | SSA1_Por_EF_HISP | | 0.049133 | | SSA1_Por_EF_TRP-L | | 0.065903 | | SSA1_Por_EF_THR-L | | 0.088147 | | SSA1_Por_EF_MET-L | | 0.039207 | | SSA1_Bt_ASPTA | | 0.817173 | | SSA1_Bt_ASNS1 | | 0.135612 | | SSA1_Bt_DHDPRy | | 0.159891 | | SSA1_Bt_DAPE | 0.159891 | | | SSA1_Bt_DAPDC | 0.159891 | | | SSA1_Bt_GLNS | 0.842491 | | | SSA1_Bt_CBPS | 0.015376 | | | SSA1_Bt_P5CR | 998.112 | | | SSA1_Bt_P5CDr | 0.217739 | | | SSA1_Bt_GSC | 0.111152 | | | SSA1_Bt_ORNTAr | 0.111152 | | | SSA1_Bt_ARGSL | 0.111152 | | | SSA1_Bt_METAT | 4.93E-06 | | | SSA1_Bt_CYSTS | 0.113294 | | | SSA1_Bt_CYSTGL | 0.113294 | | | SSA1_Bt_HISTP | 0.049133 | | | SSA1_Bt_HISTD | 0.049133 | | | SSA1_Bt_ILETA | 0.113294 | | | SSA1_Bt_LEUTAi | 0.16531 | | | SSA1_Bt_PHETA1 | 0.209666 | | | SSA1_Bt_PHETHPTOX | 0.104398 | | | SSA1_Bt_VALTA | 0.145393 | | | SSA1_Bt_GTPCI | 0.104398 | | | SSA1_Bt_PTHPS | 0.104398 | | | SSA1_Bt_SPR | 0.104398 | | | SSA1_Bt_GHMT2r | 0.238214 | | | SSA1_Bt_MTHFD | 0.195203 | | | SSA1_Bt_MTHFC | 0.195203 | | | SSA1_Bt_RBFK | 2.47E-06 | | | SSA1_Bt_ANNA | 0.000135 | | | SSA1_Bt_DNGAL | 0.000135 | | | SSA1_Bt_NADK | 2.61E-05 | | | SSA1_Bt_MOHMT | 2.91E-06 | | | SSA1_Bt_PANTS | 2.91E-06 | | | SSA1_Bt_PNTK | 2.91E-06 | | |

**Table S2: Continued**

| **Reaction Flux (mmol gDW-1 h-1)** | **Reaction Flux (mmol gDW-1 h-1)** |
| --- | --- |
| | SSA1_Bt_PPNCL2 | 2.91E-06 | | --- | --- | | SSA1_Bt_PPCDC | 2.91E-06 | | SSA1_Bt_PTPATi | 2.91E-06 | | SSA1_Bt_DPCOAK | 2.91E-06 | | SSA1_Bt_ALASm | 1.97E-05 | | SSA1_Bt_PPBNGS | 9.87E-06 | | SSA1_Bt_HMBS | 2.47E-06 | | SSA1_Bt_UPP3S | 2.47E-06 | | SSA1_Bt_UPPDC1 | 2.47E-06 | | SSA1_Bt_CPPPGO | 2.47E-06 | | SSA1_Bt_PPPGO | 2.47E-06 | | SSA1_Bt_FCLT | 2.47E-06 | | SSA1_Bt_GLUK | 1.88671 | | SSA1_Bt_GAPD | 3.92792 | | SSA1_Bt_PGK | 3.92792 | | SSA1_Bt_PGM | 3.92792 | | SSA1_Bt_ENO | 3.92792 | | SSA1_Bt_PYK | 3.37372 | | SSA1_Bt_PDH | 0.666063 | | SSA1_Bt_PCr | 0.978394 | | SSA1_Bt_CS | 0.665922 | | SSA1_Bt_ACONTa | 0.665922 | | SSA1_Bt_ACONTb | 0.665922 | | SSA1_Bt_SUCOAS | 0.049113 | | SSA1_Bt_SUCDi | 0.209004 | | SSA1_Bt_FUM | 0.504702 | | SSA1_Bt_MDH | 0.504702 | | SSA1_Bt_PGL | 0.531102 | | SSA1_Bt_RPI | 0.440854 | | SSA1_Bt_CYOO6m | 1.66454 | | SSA1_Bt_CYOR(q9)m | 3.32908 | | SSA1_Bt_TRDR | 0.004903 | | SSA1_Bt_PPA | 0.565679 | | SSA1_Bt_ACACT1r | 4.69E-05 | | SSA1_Bt_HMGCOAS | 4.69E-05 | | SSA1_Bt_HMGCOARx | 4.69E-05 | | SSA1_Bt_MEVK1x | 4.69E-05 | | SSA1_Bt_PMEVKx | 4.69E-05 | | SSA1_Bt_DPMVDx | 4.69E-05 | | SSA1_Bt_IPDDI | 1.23E-05 | | SSA1_Bt_DMATT | 1.23E-05 | | | SSA1_Bt_GRTT | 1.23E-05 | | --- | --- | | SSA1_Bt_FRTT | 9.87E-06 | | SSA1_Bt_HCO3E | 1.10492 | | SSA1_Bt_CAT | 1.23E-06 | | SSA1_Bt_ASPCT | 0.015376 | | SSA1_Bt_DHORTS | 0.015376 | | SSA1_Bt_DHORD2 | 0.015376 | | SSA1_Bt_ORPRT | 0.015376 | | SSA1_Bt_ORPDC | 0.015376 | | SSA1_Bt_UMPK | 0.015376 | | SSA1_Bt_ATUD | 0.013567 | | SSA1_Bt_ATCM | 2.91E-06 | | SSA1_Bt_ATCD | -0.00064 | | SSA1_Bt_ATDCD | 0.000643 | | SSA1_Bt_ATDGD | 0.000643 | | SSA1_Bt_ATGD | 0.173724 | | SSA1_Bt_NDPK | 0.001809 | | SSA1_Bt_ATDTD | 0.001809 | | SSA1_Bt_PRDPAR | 0.125234 | | SSA1_Bt_PPRGL | 0.125234 | | SSA1_Bt_FPGFT | 0.125234 | | SSA1_Bt_PRFGS | 0.125234 | | SSA1_Bt_PRFGCL | 0.125234 | | SSA1_Bt_PRAIC | 0.125234 | | SSA1_Bt_PRAIS | 0.125234 | | SSA1_Bt_AIAL | 0.125234 | | SSA1_Bt_FPAIF | 0.174367 | | SSA1_Bt_ICH | 0.174367 | | SSA1_Bt_IMPD | 0.115055 | | SSA1_Bt_GMPS(glu) | 0.115055 | | SSA1_Bt_AGPT | 0.115055 | | SSA1_Bt_DGOTO | 0.000643 | | SSA1_Bt_ADSS | 0.059312 | | SSA1_Bt_AAL(fum) | 0.059312 | | SSA1_Bt_ATAM | 0.537788 | | SSA1_Bt_DAOTO | 0.001809 | | SSA1_Bt_DCDT | 0.000643 | | SSA1_Bt_TMDS | 0.001809 | | SSA1_Bt_DTMPK | 0.001809 | | SSA1_Bt_DM_ALA-B | 2.91E-06 | | SSA1_Bt_DM_PG160 | 0.000636 | |

**Table S2: Continued**

| **Reaction Flux (mmol gDW-1 h-1)** |  |
| --- | --- |
| | SSA1_Bt_DM_OCTAPB | 2.47E-06 | | --- | --- | | SSA1_Bt_DM_DHBPT | 0.104398 | | SSA1_Bt_O2tex | 2.01563 | | SSA1_Bt_Pitex | -0.34944 | | SSA1_Bt_NH4tex | -3.69554 | | SSA1_Bt_UP_hcys-L | 0.159695 | | SSA1_Bt_UP_thmpp | 2.47E-06 | | SSA1_Bt_UP_ribflv | 2.47E-06 | | SSA1_Bt_UP_pdx5p | 2.47E-06 | | SSA1_Bt_UP_nicrnt | 0.000135 | | SSA1_Bt_EF_dad-5 | 4.93E-06 | | SSA1_Bt_EF_pppi | 0.104398 | | Bt_GROW | 0.312566 | | EX_pppi(e) | 0.104398 | | EX_dad-5(e) | 4.93E-06 | | EX_o2(e) | -2.01563 | | EX_h(e) | 3.43033 | | EX_pi(e) | -0.34944 | | EX_nh4(e) | -3.69554 | | EX_hcys-L(e) | -0.1597 | | EX_thmpp(e) | -2.47E-06 | | EX_ribflv(e) | -2.47E-06 | | EX_pdx5p(e) | -2.47E-06 | | EX_nicrnt(e) | -0.00013 | |  |

**Table S3:** **Primers used in the validation of gene expression of selected genes**

| **Target gene** | **Primer sequence** | **Amplicon length (bp)** | **Tm (0C)** |
| --- | --- | --- | --- |
| ENSSSA1UGT022145 (AQP1) | F - TTGTTTCGCAAGTTTGCCGT | 90 | 59.83 |
| R - GACTGATTGACGCCCTGGAT |  | 59.82 |
| ENSSSA1UGT002057 (SUC1) | F - AACACTGCGAATAGCGCATC | 86 | 59.35 |
| R - CGCCACTCTAGATGTTCGCA |  | 60.18 |
| ENSSSA1UGT002066 (SUC2) | F - CGGTAAGGTCTGAAACTGCGAT | 110 | 60.86 |
| R - GTTTTGCTAGATGTGCAAGGCA |  | 58.76 |
| Diaminopimelate decarboxylase (*LysA*) | F - ACTACAATTCTCGCCCTCGC | 86 | 60.18 |
| R - GTCATCAAAGGTCTCCCGCC |  | 60.74 |
| Arginosuccinate lyase (*ArgH*) | F - AAGCTCTGGTGTAAGGCACA | 98 | 59.24 |
|  | R - AGGATGTCTTGGGTCGCTTC |  | 59.75 |
| Branched-chain-amino-acid aminotransferase (*BCAT*) | F - CGTCCAGAGTCAGTGGCAA | 93 | 59.63 |
| R - GTTCATGGCTCCGGCTTCAG |  | 61.37 |
| Aspartate aminotransferase (*AAT*) | F - GGTCCTACCAGTTGTGCGAA | 95 | 59.97 |
| R - AGAATGGAGCCGAACCCAAG |  | 60.04 |
| 60S ribosomal protein L13a (*RPL13A*) | F - CATTCCACTACAGAGCTCCA | 101 | 60.00 |
| R - TTTCAGGTTTCGGATGGCTT |  | 60.00 |
| β-Tubulin (β-Tub) | F - TGTCAGGAGTAACGACGTGTTTG | 150 | 60.00 |
|  | R - TTCGGGAACGGTAAGTGCTC |  | 60.00 |
| 4-hydroxy-tetrahydrodipicolinate reductase (*dapB*) | F - TGGTAAAAGACTACCAGGCGAA | 118 | 59.37 |
| R - AGCTTGGTGTTTACAGCTGAGAG |  | 60.81 |


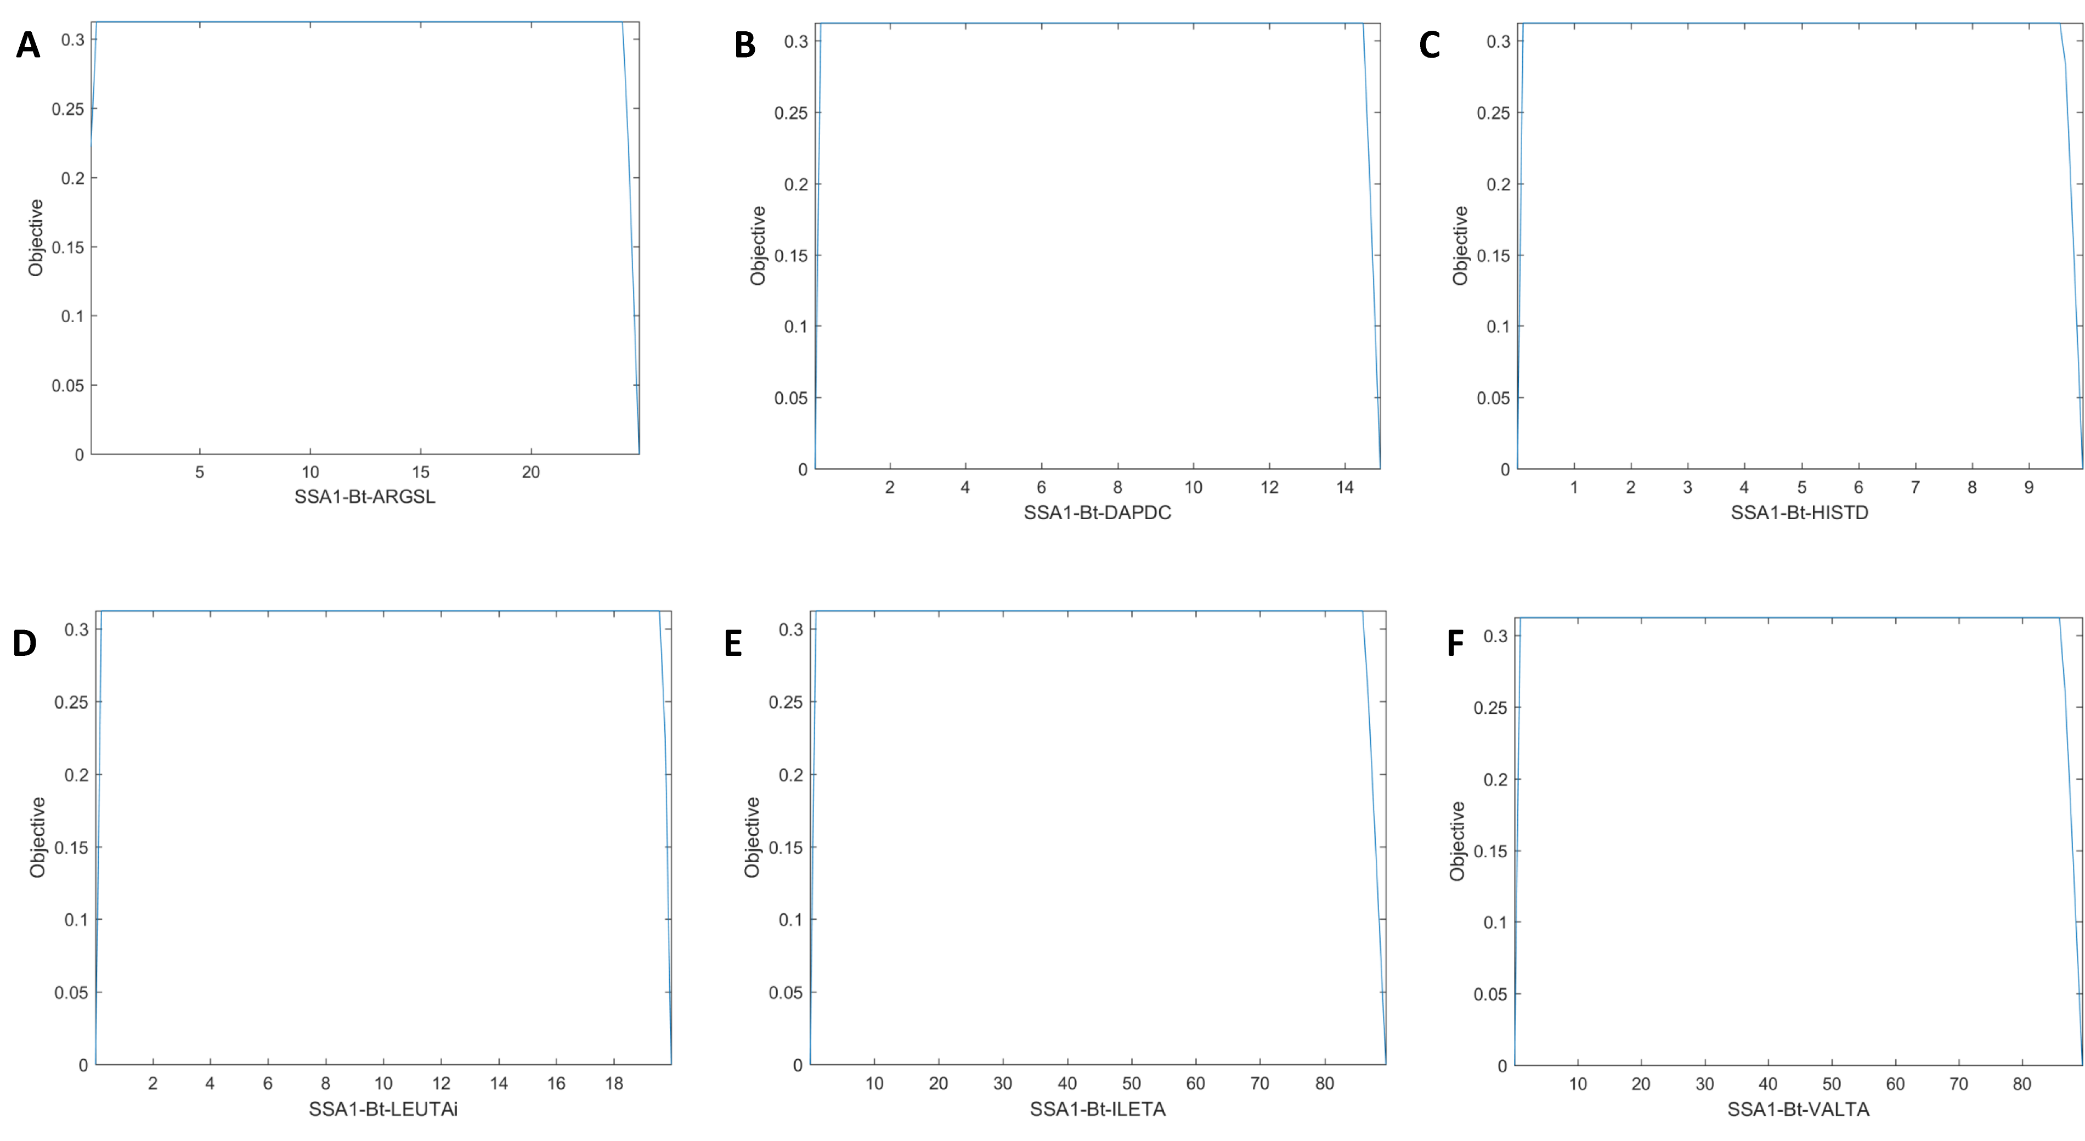


**Figure S2: Robustness analysis measuring sensitivity of the metabolic object function (growth rate of B. tabaci SSA1-SG1) to the quantitative flux levels through terminal reactions for (A) arginine biosynthesis, (B) lysine biosynthesis, (C) histidine biosynthesis, (D) leucine biosynthesis, (E) isoleucine synthesis and (F) valine biosynthesis.**


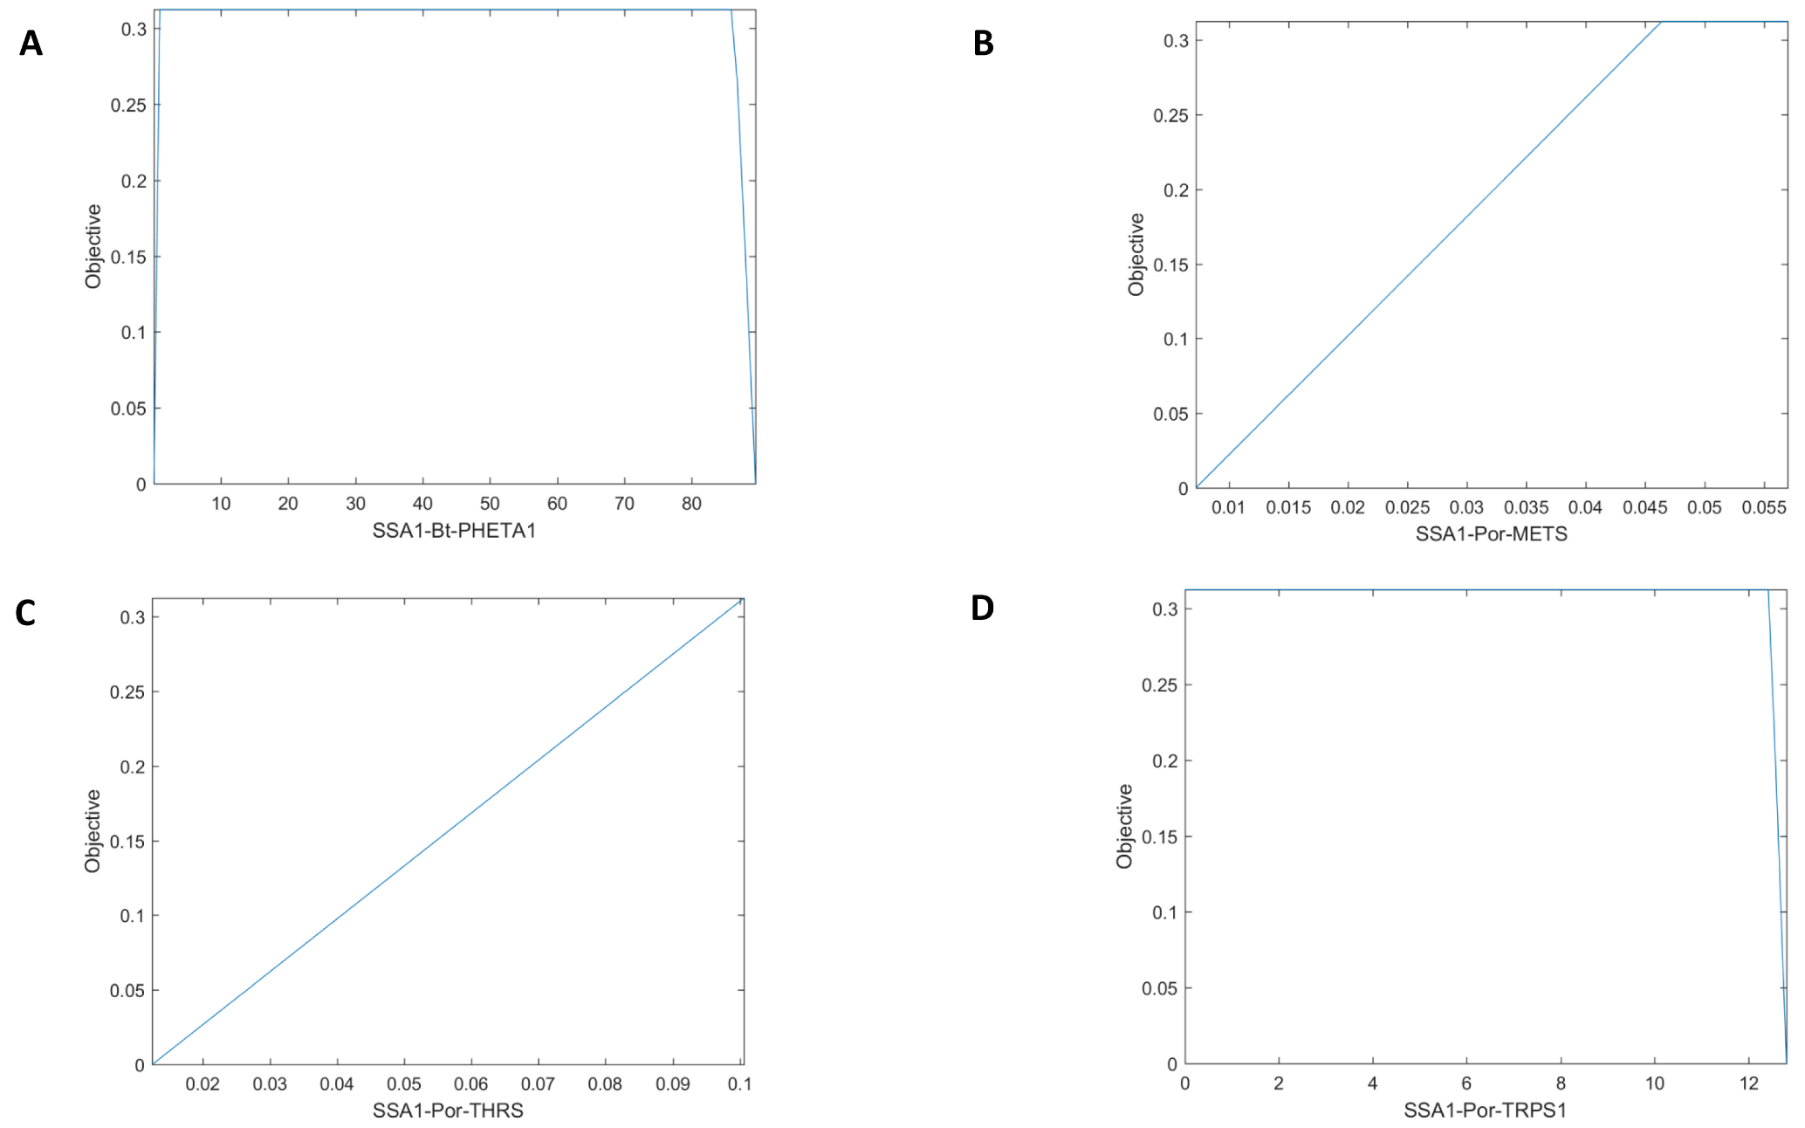


**Figure S3: Robustness analysis measuring sensitivity of the metabolic object function (growth rate of B. tabaci SSA1-SG1) to the quantitative flux levels through terminal reactions for (A) phenylalanine biosynthesis (B) methionine biosynthesis (C) threonine biosynthesis and (D) tryptophan biosynthesis**
