# Supplementary material for: In silico prediction of candidate gene targets for the management of African cassava whitefly (Bemisia tabaci, SSA1-SG1), a key vector of viruses causing cassava brown streak disease
Source: PeerJ. 2024 Feb 23;12:e16949. doi: 10.7717/peerj.16949 (PMC10896082; doi:10.7717/peerj.16949)
Supplement: Supplemental Information 3 — (A) Expression values for the transcripts with enriched expression in the SSA1-SG1 gut, (B) Interproscan annotation of transcripts with enriched expression in the SSA1-SG1 gut, and (C) Fischer’s exact enrichment test. [file peerj-12-16949-s003.xlsx]

## Sheet: Dataset S1A
Dataset S1: RNASeq Analysis. A. Expression values for the transcripts with enriched expression in the SSA1-SG1 gut
Tags	Name	FC	logFC	logCPM	P-Value	FDR	LR
[UP]	scaffold_000040F_transcript_id_19742seq_length_2283	3.61206	1.85282	0.629419	0.00066418	0.00119952	11.5869
[UP]	scaffold_000107F_transcript_id_2872seq_length_2255	3.5281	1.81889	1.02675	8.16448e-05	0.000162367	15.5198
[UP]	scaffold_000253F_transcript_id_4230seq_length_864	3.08793	1.62664	0.129853	0.014067	0.0214754	6.02971
[UP]	scaffold_000764F_transcript_id_743seq_length_3544	10.9568	3.45376	3.80313	1.79313e-65	1.74053e-64	292.033
[UP]	scaffold_000005F_transcript_id_23832seq_length_7873	17.8017	4.15395	8.06405	0	0	6064.47
[UP]	scaffold_000097F_transcript_id_12127seq_length_2356	23.9256	4.58048	6.68958	0	0	2718.16
[UP]	scaffold_000012F_transcript_id_22165seq_length_1948	2.50509	1.32486	0.826458	0.00578401	0.00937693	7.61639
[UP]	scaffold_000033F_transcript_id_T1E8G0.1seq_length_576	2.99049	1.58038	6.67824	3.61513e-146	6.29322e-145	662.833
[UP]	scaffold_000049F_transcript_id_14120seq_length_2822	2.83105	1.50134	0.698133	0.00342017	0.00568913	8.56856
[UP]	scaffold_000132F_transcript_id_17161seq_length_1192	5.3508	2.41976	1.17875	1.72555e-07	4.24486e-07	27.3185
[UP]	scaffold_000501F_transcript_id_6836seq_length_1786	2.16892	1.11698	4.46655	4.74308e-19	1.96362e-18	79.5327
[UP]	scaffold_000100F_transcript_id_15080seq_length_1871	3.95871	1.98503	7.7686	0	0	1948.9
[UP]	scaffold_000710F_transcript_id_6465seq_length_2016	10.7531	3.42668	0.359328	2.90789e-06	6.55812e-06	21.8764
[UP]	scaffold_000025F_transcript_id_20216seq_length_2496	25.0676	4.64775	11.8652	0	0	1570.02
[UP]	scaffold_000057F_transcript_id_16370seq_length_968	3.8202	1.93365	4.18465	3.5704e-39	2.40756e-38	171.449
[UP]	scaffold_000166F_transcript_id_2057seq_length_1732	3.22301	1.68841	6.36099	4.5663e-133	7.49366e-132	602.594
[UP]	scaffold_000083F_transcript_id_15558seq_length_5545	14.0167	3.80907	6.90917	0	0	2677.28
[UP]	scaffold_000391F_transcript_id_2909seq_length_2165	3.10644	1.63526	5.43154	1.98069e-68	1.98405e-67	305.604
[UP]	scaffold_000096F_transcript_id_10823seq_length_1347	2.05191	1.03697	5.59703	1.65743e-34	1.03032e-33	150.089
[UP]	scaffold_000023F_transcript_id_21246seq_length_1213	19.0147	4.24904	7.15679	0	0	3476.38
[UP]	scaffold_000111F_transcript_id_8402seq_length_3472	3.50684	1.81017	3.27745	2.99318e-08	7.6916e-08	30.7119
[UP]	scaffold_000087F_transcript_id_10171seq_length_825	25.4237	4.6681	3.09197	2.02749e-52	1.67737e-51	232.148
[UP]	scaffold_000359F_transcript_id_4495seq_length_2293	25.2663	4.65914	7.12439	0	0	3661.1
[UP]	scaffold_000012F_transcript_id_21926seq_length_1430	2.35174	1.23373	5.06616	2.97679e-33	1.79917e-32	144.351
[UP]	scaffold_000032F_transcript_id_17634seq_length_1545	2.47797	1.30916	8.08015	7.72671e-252	1.90358e-250	1148.91
[UP]	scaffold_000354F_transcript_id_13760seq_length_1830	4.20741	2.07293	3.98945	3.02509e-38	2.00215e-37	167.2
[UP]	scaffold_000552F_transcript_id_88seq_length_1482	5.08012	2.34486	3.35395	6.40613e-30	3.57254e-29	129.113
[UP]	scaffold_000443F_transcript_id_11017seq_length_3190	20.3298	4.34552	7.16173	0	0	3553.43
[UP]	scaffold_000088F_transcript_id_14849seq_length_3261	9.92877	3.31161	1.29422	2.00446e-11	6.08867e-11	44.9664
[UP]	scaffold_000017F_transcript_id_23067seq_length_638	3.42181	1.77476	7.19509	1.51103e-247	3.67746e-246	1129.17
[UP]	scaffold_000308F_transcript_id_4476seq_length_1804	3.61008	1.85203	10.3246	4.28933e-281	1.14386e-279	1283.53
[UP]	scaffold_000097F_transcript_id_11677seq_length_2278	7.74817	2.95386	5.89628	3.83556e-225	8.68152e-224	1026.09
[UP]	scaffold_000460F_transcript_id_6858seq_length_3848	29.7673	4.89565	4.57543	1.43285e-149	2.53838e-148	678.477
[UP]	scaffold_000067F_transcript_id_12898seq_length_1281	4.03224	2.01158	9.16623	0	0	2345.43
[UP]	scaffold_000286F_transcript_id_4440seq_length_2015	2.13682	1.09547	5.95028	1.62965e-45	1.21944e-44	200.494
[UP]	scaffold_000176F_transcript_id_12042seq_length_2156	31.8219	4.99195	5.53943	1.10623e-291	3.08115e-290	1332.25
[UP]	scaffold_000067F_transcript_id_13305seq_length_2073	6.66826	2.73731	7.12376	0	0	2091.08
[UP]	scaffold_000012F_transcript_id_21357seq_length_1743	3.12231	1.64261	1.7148	2.43909e-06	5.54421e-06	22.2138
[UP]	scaffold_000672F_transcript_id_2603seq_length_2476	29.481	4.88171	3.11099	1.0032e-54	8.54639e-54	242.721
[UP]	scaffold_000012F_transcript_id_21668seq_length_2169	2.34137	1.22735	8.18578	8.94004e-191	1.81829e-189	867.986
[UP]	scaffold_000207F_transcript_id_12846seq_length_1341	7.46488	2.90012	1.38038	1.58418e-10	4.60557e-10	40.9221
[UP]	scaffold_000307F_transcript_id_5716seq_length_1213	4.78228	2.2577	5.61699	3.87541e-129	6.15827e-128	584.532
[UP]	scaffold_000191F_transcript_id_5703seq_length_1686	16.3236	4.02888	5.77627	2.23193e-290	6.18221e-289	1326.25
[UP]	scaffold_000527F_transcript_id_594seq_length_2910	4.34428	2.11912	7.05558	2.31967e-301	6.53353e-300	1376.79
[UP]	scaffold_000218F_transcript_id_5408seq_length_4457	2.74949	1.45916	7.71719	4.63661e-94	5.88497e-93	423.314
[UP]	scaffold_000100F_transcript_id_15613seq_length_1565	9.08868	3.18407	5.37747	4.65943e-174	9.01933e-173	791.094
[UP]	scaffold_000193F_transcript_id_4708seq_length_2172	11.6367	3.5406	8.23251	0	0	5622.33
[UP]	scaffold_000009F_transcript_id_26670seq_length_3010	17.4371	4.12409	9.84635	1.68791e-88	2.0741e-87	397.766
[UP]	scaffold_000240F_transcript_id_14072seq_length_4395	2.19134	1.13181	3.48128	1.55134e-10	4.51402e-10	40.9631
[UP]	scaffold_000156F_transcript_id_9451seq_length_2411	5.65491	2.4995	7.70602	3.73235e-40	2.5598e-39	175.94
[UP]	scaffold_000125F_transcript_id_12089seq_length_2421	2.45058	1.29312	6.5616	1.83051e-95	2.34713e-94	429.763
[UP]	scaffold_000004F_transcript_id_24022seq_length_2590	34.3545	5.10243	6.99519	0	0	3578.66
[UP]	scaffold_000089F_transcript_id_16110seq_length_802	3.15983	1.65985	9.86873	0	0	2929.91
[UP]	scaffold_000136F_transcript_id_16425seq_length_2459	3.11812	1.64068	6.18372	6.31179e-113	9.06709e-112	510.009
[UP]	scaffold_000007F_transcript_id_24954seq_length_2002	2.85353	1.51275	2.31624	4.2029e-08	1.07016e-07	30.0535
[UP]	scaffold_000122F_transcript_id_15753seq_length_1402	2.38691	1.25514	8.20656	1.19523e-251	2.9374e-250	1148.04
[UP]	scaffold_000464F_transcript_id_12016seq_length_1917	7.69567	2.94405	6.10986	1.76678e-258	4.42886e-257	1179.47
[UP]	scaffold_000176F_transcript_id_11595seq_length_3651	3.11007	1.63695	3.14834	2.41895e-15	8.76257e-15	62.6904
[UP]	scaffold_000059F_transcript_id_16372seq_length_1410	3.4771	1.79788	7.21463	4.43373e-256	1.10042e-254	1168.43
[UP]	scaffold_000108F_transcript_id_14586seq_length_2150	5.09689	2.34962	6.2509	1.31061e-208	2.79606e-207	950.024
[UP]	scaffold_000231F_transcript_id_5222seq_length_1535	2.09017	1.06362	5.29273	1.10857e-29	6.14801e-29	128.025
[UP]	scaffold_000007F_transcript_id_25180seq_length_2452	2.6162	1.38747	7.01928	5.67364e-145	9.84249e-144	657.335
[UP]	scaffold_000730F_transcript_id_10424seq_length_1995	18.9377	4.24319	6.14095	0	0	1774.43
[UP]	scaffold_000027F_transcript_id_21190seq_length_2721	4.19002	2.06696	0.593794	0.000249223	0.000472393	13.418
[UP]	scaffold_000017F_transcript_id_23156seq_length_1804	12.5252	3.64676	3.41132	5.48612e-53	4.56509e-52	234.751
[UP]	scaffold_000041F_transcript_id_19295seq_length_987	7.07647	2.82303	7.94281	0	0	3656.58
[UP]	scaffold_000019F_transcript_id_21720seq_length_2022	13.1392	3.7158	5.11394	4.66914e-172	8.93463e-171	781.891
[UP]	scaffold_000110F_transcript_id_8395seq_length_5499	2.56666	1.35989	5.39583	7.97128e-49	6.28365e-48	215.667
[UP]	scaffold_000000F_transcript_id_26692seq_length_1401	4.19002	2.06696	0.593795	0.000249223	0.000472393	13.418
[UP]	scaffold_000027F_transcript_id_21538seq_length_1215	7.44774	2.8968	6.9459	0	0	2007.86
[UP]	scaffold_000188F_transcript_id_5864seq_length_2804	7.25983	2.85994	4.0531	2.23211e-62	2.08005e-61	277.829
[UP]	scaffold_000203F_transcript_id_9604seq_length_3511	2.03568	1.02551	5.28856	9.38727e-28	5.0003e-27	119.217
[UP]	scaffold_000095F_transcript_id_15020seq_length_1278	3.20309	1.67947	6.9117	2.3231e-188	4.69632e-187	856.879
[UP]	scaffold_000104F_transcript_id_5400seq_length_2937	6.10141	2.60914	8.73625	0	0	4482.7
[UP]	scaffold_000546F_transcript_id_4401seq_length_840	2.18711	1.12903	5.32838	9.57259e-34	5.84557e-33	146.605
[UP]	scaffold_000018F_transcript_id_24075seq_length_652	2.29025	1.19551	5.61267	6.87041e-45	5.0841e-44	197.63
[UP]	scaffold_000037F_transcript_id_19622seq_length_2081	12.4786	3.64138	2.91566	9.87796e-38	6.46939e-37	164.847
[UP]	scaffold_000583F_transcript_id_9656seq_length_2288	2.35619	1.23645	3.59825	4.64683e-13	1.52817e-12	52.3488
[UP]	scaffold_000050F_transcript_id_20210seq_length_2315	20.3035	4.34366	9.13314	1.30039e-226	2.97017e-225	1032.85
[UP]	scaffold_000105F_transcript_id_C4WUE4.1seq_length_759	9.25475	3.21019	3.33248	6.75709e-44	4.91679e-43	193.081
[UP]	scaffold_000249F_transcript_id_U5EUQ4.1seq_length_2067	2.34934	1.23226	6.54829	5.95319e-55	5.09758e-54	243.761
[UP]	scaffold_000429F_transcript_id_7231seq_length_2293	2.5378	1.34358	5.15437	7.96174e-41	5.53239e-40	179.013
[UP]	scaffold_000304F_transcript_id_6671seq_length_2036	27.7925	4.79663	7.90657	0	0	6164.67
[UP]	scaffold_000784F_transcript_id_3556seq_length_2968	10.6352	3.41078	5.06114	6.77321e-152	1.21711e-150	689.17
[UP]	scaffold_000072F_transcript_id_16555seq_length_2289	2.52042	1.33367	4.38812	1.78842e-24	8.69666e-24	104.244
[UP]	scaffold_000045F_transcript_id_19505seq_length_2265	29.7321	4.89395	10.4352	0	0	8422.56
[UP]	scaffold_000043F_transcript_id_16986seq_length_1796	12.3993	3.63219	4.00981	9.01575e-06	1.95174e-05	19.7094
[UP]	scaffold_000959F_transcript_id_8406seq_length_1248	29.608	4.88792	6.99817	0	0	3487.34
[UP]	scaffold_000225F_transcript_id_1644seq_length_1192	16.6695	4.05914	6.70011	0	0	2477.35
[UP]	scaffold_000372F_transcript_id_2659seq_length_2547	25.1941	4.65501	11.2332	5.0508e-276	1.31544e-274	1260.2
[UP]	scaffold_000257F_transcript_id_7492seq_length_2253	19.3577	4.27484	0.316258	3.09228e-07	7.49669e-07	26.1912
[UP]	scaffold_000037F_transcript_id_18704seq_length_715	5.92223	2.56614	5.78229	2.59202e-173	4.98852e-172	787.666
[UP]	scaffold_000117F_transcript_id_15461seq_length_2779	3.53424	1.8214	8.51404	0	0	2074.84
[UP]	scaffold_000022F_transcript_id_21636seq_length_1732	10.4295	3.3826	1.94427	4.14075e-18	1.65812e-17	75.2531
[UP]	scaffold_000041F_transcript_id_19768seq_length_2068	3.69116	1.88407	6.99165	6.42247e-240	1.53329e-238	1094.07
[UP]	scaffold_000006F_transcript_id_25490seq_length_1831	2.15666	1.1088	2.9012	1.00682e-05	2.16871e-05	19.4984
[UP]	scaffold_000040F_transcript_id_19663seq_length_2372	6.22113	2.63718	7.59055	1.27739e-306	3.68058e-305	1400.99
[UP]	scaffold_000045F_transcript_id_19105seq_length_2003	3.82097	1.93394	7.15782	2.56983e-278	6.79886e-277	1270.75
[UP]	scaffold_000902F_transcript_id_4052seq_length_578	2.91308	1.54254	0.271871	0.0124457	0.0192108	6.24624
[UP]	scaffold_000456F_transcript_id_7258seq_length_2582	10.5709	3.40203	8.44655	0	0	5636.49
[UP]	scaffold_000035F_transcript_id_20079seq_length_1181	4.43775	2.14983	6.0821	2.32824e-163	4.32319e-162	741.889
[UP]	scaffold_000087F_transcript_id_9960seq_length_1686	30.087	4.91107	9.95557	5.27714e-122	8.04163e-121	551.736
[UP]	scaffold_000030F_transcript_id_22622seq_length_1569	27.508	4.78178	9.54495	0	0	6582.2
[UP]	scaffold_000252F_transcript_id_12008seq_length_1454	3.08485	1.6252	1.48131	1.91176e-05	4.00862e-05	18.2752
[UP]	scaffold_000007F_transcript_id_25453seq_length_999	2.75292	1.46096	3.99289	4.75107e-22	2.16148e-21	93.1899
[UP]	scaffold_000491F_transcript_id_3873seq_length_2789	21.3679	4.41737	10.9945	2.06596e-79	2.33019e-78	356.025
[UP]	scaffold_000022F_transcript_id_21626seq_length_1814	16.401	4.03571	3.96173	8.11566e-85	9.66457e-84	380.853
[UP]	scaffold_000185F_transcript_id_6462seq_length_2030	2.12695	1.08879	0.886578	0.0182154	0.027224	5.57531
[UP]	scaffold_000079F_transcript_id_14854seq_length_2094	11.0425	3.465	1.8417	2.63665e-17	1.0287e-16	71.5992
[UP]	scaffold_000283F_transcript_id_3703seq_length_3254	4.59773	2.20092	3.06623	4.37769e-06	9.72191e-06	21.0919
[UP]	scaffold_000002F_transcript_id_24908seq_length_3481	2.94415	1.55785	0.856828	0.00125571	0.00220046	10.4065
[UP]	scaffold_000010F_transcript_id_23242seq_length_3052	23.5044	4.55486	9.93785	1.54059e-75	1.65568e-74	338.242
[UP]	scaffold_000109F_transcript_id_5554seq_length_755	240.708	7.91114	1.35931	8.44187e-20	3.57763e-19	82.9438
[UP]	scaffold_000019F_transcript_id_23131seq_length_2253	10.2555	3.35833	1.55725	7.7572e-14	2.63934e-13	55.8663
[UP]	scaffold_000002F_transcript_id_W4VRA2.1seq_length_11679	2.01361	1.00979	5.91194	2.7876e-40	1.91578e-39	176.52
[UP]	scaffold_000176F_transcript_id_11595seq_length_3651	2.54677	1.34867	1.6469	0.000112031	0.000219961	14.9223
[UP]	scaffold_000199F_transcript_id_10539seq_length_2150	22.7699	4.50905	7.19921	0	0	3749.66
[UP]	scaffold_000037F_transcript_id_19668seq_length_1386	24.4709	4.61299	5.68825	1.43073e-305	4.09883e-304	1396.17
[UP]	scaffold_000173F_transcript_id_7249seq_length_1617	15.0188	3.9087	5.91618	3.11545345778803E-310	0	1417.62
[UP]	scaffold_000000F_transcript_id_27025seq_length_5285	6.67186	2.73809	3.03336	1.17216e-29	6.48994e-29	127.914
[UP]	scaffold_000062F_transcript_id_20006seq_length_1919	3.69875	1.88704	1.66417	2.05903e-07	5.03068e-07	26.9769
[UP]	scaffold_000233F_transcript_id_14191seq_length_3041	20.4179	4.35176	7.71517	0	0	5071.82
[UP]	scaffold_000034F_transcript_id_19722seq_length_5118	20.8146	4.37952	8.37093	0	0	6965.41
[UP]	scaffold_000123F_transcript_id_13330seq_length_2136	5.36821	2.42444	0.629415	2.71569e-05	5.61331e-05	17.6071
[UP]	scaffold_000000F_transcript_id_26850seq_length_3858	9.01995	3.17312	6.50016	0	0	1677.29
[UP]	scaffold_000120F_transcript_id_14200seq_length_3068	5.17753	2.37226	6.32537	8.53883e-83	1.00374e-81	371.565
[UP]	scaffold_000346F_transcript_id_6374seq_length_1533	3.35644	1.74693	8.83732	8.31607e-220	1.8489e-218	1001.54
[UP]	scaffold_000354F_transcript_id_13753seq_length_3231	5.29285	2.40405	3.26616	3.31966e-29	1.81694e-28	125.848
[UP]	scaffold_000555F_transcript_id_10518seq_length_1302	2.87766	1.52489	7.86684	3.15599e-290	8.71765e-289	1325.56
[UP]	scaffold_000006F_transcript_id_26080seq_length_3798	2.02178	1.01563	10.1468	7.82602e-86	9.38654e-85	385.518
[UP]	scaffold_000191F_transcript_id_5722seq_length_2178	16.9587	4.08395	5.2659	2.81891e-208	6.0011e-207	948.494
[UP]	scaffold_000000F_transcript_id_27043seq_length_2243	2.22353	1.15285	7.91645	2.86964e-69	2.88895e-68	309.456
[UP]	scaffold_000338F_transcript_id_3747seq_length_1112	29.9581	4.90487	6.69431	0	0	2862.11
[UP]	scaffold_000009F_transcript_id_26789seq_length_1658	5.81263	2.53919	5.12338	7.9117e-110	1.12049e-108	495.77
[UP]	scaffold_000784F_transcript_id_3556seq_length_2968	16.6549	4.05787	5.60016	1.40914e-259	3.55012e-258	1184.52
[UP]	scaffold_000093F_transcript_id_19017seq_length_1669	12.4324	3.63603	4.6895	3.13562e-126	4.89733e-125	571.163
[UP]	scaffold_000092F_transcript_id_12827seq_length_1832	2.15039	1.1046	0.698134	0.0266945	0.0388316	4.91046
[UP]	scaffold_000449F_transcript_id_106seq_length_2322	10.7316	3.42379	6.47712	0	0	1802.25
[UP]	scaffold_000221F_transcript_id_2231seq_length_3561	5.06915	2.34175	10.4942	0	0	1788.04
[UP]	scaffold_000065F_transcript_id_18505seq_length_1456	31.6779	4.9854	11.7466	0	0	8966.89
[UP]	scaffold_000018F_transcript_id_24389seq_length_2193	5.29488	2.4046	2.0532	4.32749e-13	1.42437e-12	52.4886
[UP]	scaffold_000025F_transcript_id_20443seq_length_1434	5.18009	2.37298	7.90799	0	0	2802.52
[UP]	scaffold_000007F_transcript_id_24948seq_length_1056	2.33723	1.2248	3.74755	4.06625e-14	1.40594e-13	57.1363
[UP]	scaffold_000005F_transcript_id_23354seq_length_2580	3.14849	1.65466	3.7875	1.48232e-09	4.11155e-09	36.5575
[UP]	scaffold_000038F_transcript_id_7712seq_length_2145	16.0742	4.00667	0.795422	1.24501e-09	3.46673e-09	36.8976
[UP]	scaffold_000630F_transcript_id_848seq_length_2574	12.8077	3.67894	6.98542	0	0	2717.78
[UP]	scaffold_000025F_transcript_id_20016seq_length_2596	10.0946	3.33551	4.35916	4.64472e-92	5.80705e-91	414.122
[UP]	scaffold_000021F_transcript_id_20659seq_length_1961	2.16554	1.11472	0.593798	0.0323628	0.0464371	4.57917
[UP]	scaffold_000084F_transcript_id_17251seq_length_1477	2.25771	1.17486	1.02675	0.00735755	0.0117643	7.18354
[UP]	scaffold_000039F_transcript_id_21667seq_length_2229	6.11406	2.61213	8.77995	0	0	3910.61
[UP]	scaffold_000019F_transcript_id_22591seq_length_1008	2.8265	1.49902	6.49374	1.92365e-118	2.88749e-117	535.363
[UP]	scaffold_000196F_transcript_id_7442seq_length_2368	26.7537	4.74166	7.02932	0	0	3485.03
[UP]	scaffold_000047F_transcript_id_19061seq_length_3328	16.9588	4.08396	4.28292	1.01177e-106	1.39738e-105	481.492
[UP]	scaffold_000178F_transcript_id_9413seq_length_2044	2.16263	1.11279	2.12984	0.000105398	0.000207302	15.0375
[UP]	scaffold_000008F_transcript_id_24089seq_length_1763	5.56294	2.47585	8.06042	0	0	1730.53
[UP]	scaffold_000063F_transcript_id_16476seq_length_2259	12.901	3.68942	4.97378	2.32227e-155	4.22603e-154	705.104
[UP]	scaffold_000002F_transcript_id_25252seq_length_1719	23.1819	4.53493	8.75134	3.03787e-127	4.78191e-126	575.823
[UP]	scaffold_000049F_transcript_id_13852seq_length_1119	2.13699	1.09558	6.29333	1.21745e-59	1.09581e-58	265.272
[UP]	scaffold_000012F_transcript_id_21462seq_length_1646	7.12725	2.83335	4.95814	1.04249e-113	1.51274e-112	513.604
[UP]	scaffold_000038F_transcript_id_7666seq_length_1883	10.113	3.33814	3.55254	3.14919e-53	2.63141e-52	235.857
[UP]	scaffold_000652F_transcript_id_3234seq_length_2618	6.17039	2.62536	5.29951	2.04457e-129	3.26448e-128	585.809
[UP]	scaffold_000004F_transcript_id_23512seq_length_1473	2.43798	1.28569	8.38542	1.37104e-96	1.76476e-95	434.934
[UP]	scaffold_000344F_transcript_id_1124seq_length_1250	3.6579	1.87102	0.795428	0.000238542	0.000453433	13.5002
[UP]	scaffold_000286F_transcript_id_4445seq_length_2764	2.14825	1.10316	6.63356	4.18314e-75	4.48124e-74	336.25
[UP]	scaffold_000111F_transcript_id_8402seq_length_3472	4.02567	2.00923	2.80321	1.0851e-16	4.14804e-16	68.8084
[UP]	scaffold_001071F_transcript_id_10164seq_length_1398	2.47549	1.30771	1.55726	0.000281752	0.000531438	13.188
[UP]	scaffold_000025F_transcript_id_19677seq_length_2017	2.35295	1.23447	6.54599	6.37206e-68	6.34485e-67	303.275
[UP]	scaffold_000058F_transcript_id_16324seq_length_529	2.03321	1.02376	3.52922	3.08441e-09	8.41104e-09	35.1298
[UP]	scaffold_000981F_transcript_id_1612seq_length_1996	3.33686	1.73849	0.557269	0.00173679	0.00299297	9.8088
[UP]	scaffold_000125F_transcript_id_12435seq_length_2697	2.85353	1.51275	2.31624	4.20294e-08	1.07016e-07	30.0535
[UP]	scaffold_000068F_transcript_id_17672seq_length_2094	6.49014	2.69825	2.65553	1.3475e-22	6.22644e-22	95.6842
[UP]	scaffold_000101F_transcript_id_11363seq_length_1154	2.16605	1.11507	6.4378	1.46184e-67	1.44984e-66	301.62
[UP]	scaffold_000062F_transcript_id_19252seq_length_2497	25.8294	4.69094	1.35931	6.02915e-16	2.23988e-15	65.4275
[UP]	scaffold_000005F_transcript_id_23832seq_length_7873	18.5718	4.21504	4.72078	9.07295e-148	1.59604e-146	670.192
[UP]	scaffold_000058F_transcript_id_16463seq_length_1278	3.24168	1.69674	8.2489	3.45802e-119	5.22192e-118	538.789
[UP]	scaffold_000190F_transcript_id_11052seq_length_1006	2.1824	1.12591	5.40615	2.58851e-35	1.62931e-34	153.779
[UP]	scaffold_000100F_transcript_id_15572seq_length_1617	10.352	3.37184	2.77166	1.22589e-31	7.12581e-31	136.967
[UP]	scaffold_000172F_transcript_id_7998seq_length_1525	15.492	3.95345	4.86407	4.89656e-154	8.84645e-153	699.015
[UP]	scaffold_000116F_transcript_id_18428seq_length_1678	27.0042	4.75511	2.99289	1.35612e-49	1.07834e-48	219.194
[UP]	scaffold_000283F_transcript_id_3707seq_length_1596	19.224	4.26484	2.87913	2.41845e-42	1.71741e-41	185.963
[UP]	scaffold_000010F_transcript_id_23268seq_length_2367	21.7137	4.44054	11.058	0	0	12657.3
[UP]	scaffold_000347F_transcript_id_7851seq_length_3242	11.9682	3.58113	10.8906	0	0	3398.54
[UP]	scaffold_000182F_transcript_id_3551seq_length_3382	5.24002	2.38957	8.37236	0	0	3299.92
[UP]	scaffold_000019F_transcript_id_21641seq_length_416	144.825	7.17816	0.73129	1.71351e-12	5.51214e-12	49.7873
[UP]	scaffold_000023F_transcript_id_21242seq_length_2383	21.2297	4.40801	7.72933	0	0	4495.52
[UP]	scaffold_000084F_transcript_id_17867seq_length_1339	5.43205	2.4415	-0.268699	0.00494879	0.00808564	7.89806
[UP]	scaffold_000001F_transcript_id_25955seq_length_1248	9.89992	3.30742	0.698126	1.24262e-07	3.08945e-07	27.9536
[UP]	scaffold_000108F_transcript_id_14176seq_length_3694	2.1694	1.11729	6.18531	1.47389e-44	1.08587e-43	196.111
[UP]	scaffold_000048F_transcript_id_16433seq_length_1778	3.86294	1.9497	5.38147	3.98621e-88	4.88031e-87	396.051
[UP]	scaffold_000127F_transcript_id_13047seq_length_1683	4.64761	2.21649	2.84168	1.10038e-19	4.64374e-19	82.4199
[UP]	scaffold_000080F_transcript_id_10553seq_length_3188	11.6157	3.53801	5.63015	6.4963e-232	1.51133e-230	1057.24
[UP]	scaffold_000138F_transcript_id_2724seq_length_5607	13.3711	3.74104	9.59246	0	0	6210.58
[UP]	scaffold_000937F_transcript_id_6955seq_length_1923	3.17668	1.66752	2.54796	8.73901e-11	2.58103e-10	42.085
[UP]	scaffold_000044F_transcript_id_15481seq_length_2357	6.15232	2.62113	4.1421	3.57923e-59	3.20437e-58	263.123
[UP]	scaffold_000745F_transcript_id_810seq_length_1911	11.0121	3.46102	6.93699	0	0	2468.54
[UP]	scaffold_000106F_transcript_id_12397seq_length_1257	29.0346	4.8597	9.01385	0	0	9376.66
[UP]	scaffold_000696F_transcript_id_9505seq_length_1697	2.01443	1.01037	5.09354	7.22642e-24	3.45538e-23	101.478
[UP]	scaffold_000336F_transcript_id_9617seq_length_2883	2.36989	1.24482	2.65555	1.9256e-07	4.71617e-07	27.1064
[UP]	scaffold_000193F_transcript_id_4696seq_length_1816	2.28117	1.18977	6.0232	4.22876e-58	3.76236e-57	258.203
[UP]	scaffold_000259F_transcript_id_14671seq_length_2426	9.41758	3.23536	7.91485	5.20029e-220	1.16132e-218	1002.48
[UP]	scaffold_000162F_transcript_id_7692seq_length_2555	28.8128	4.84864	9.07723	0	0	9756.69
[UP]	scaffold_000376F_transcript_id_2286seq_length_1216	4.7374	2.24409	7.1665	0	0	1615.39
[UP]	scaffold_000019F_transcript_id_21631seq_length_2417	16.5389	4.04779	3.28301	1.83571e-53	1.53773e-52	236.931
[UP]	scaffold_000186F_transcript_id_10655seq_length_2229	2.142	1.09896	5.55017	3.96043e-37	2.57698e-36	162.087
[UP]	scaffold_000623F_transcript_id_4344seq_length_2091	23.2369	4.53835	8.22007	0	0	6679.5
[UP]	scaffold_000049F_transcript_id_12686seq_length_3578	3.07136	1.61888	6.34435	1.27633e-122	1.95685e-121	554.569
[UP]	scaffold_000569F_transcript_id_13459seq_length_1298	23.5068	4.55501	7.95275	8.46336e-37	5.47851e-36	160.577
[UP]	scaffold_000019F_transcript_id_21730seq_length_1838	4.68134	2.22692	5.19498	1.99418e-95	2.55372e-94	429.592
[UP]	scaffold_000078F_transcript_id_18399seq_length_3311	2.37132	1.24569	1.15451	0.00293439	0.00492437	8.84782
[UP]	scaffold_000005F_transcript_id_23554seq_length_2000	9.76145	3.2871	5.64438	4.6041e-216	1.01018e-214	984.317
[UP]	scaffold_000036F_transcript_id_19258seq_length_2629	3.13522	1.64857	4.63589	1.48118e-18	6.03977e-18	77.2832
[UP]	scaffold_000060F_transcript_id_14961seq_length_1242	3.76643	1.9132	1.31625	4.23478e-06	9.41302e-06	21.1555
[UP]	scaffold_000294F_transcript_id_13425seq_length_2078	16.8828	4.07748	7.06188	0	0	3153.03
[UP]	scaffold_001130F_transcript_id_1293seq_length_1536	18.8508	4.23655	5.33088	1.42059e-224	3.20817e-223	1023.47
[UP]	scaffold_000094F_transcript_id_18892seq_length_1411	12.7724	3.67495	5.22431	2.23037e-183	4.42849e-182	833.962
[UP]	scaffold_000299F_transcript_id_7828seq_length_2097	3.18015	1.66909	7.06057	6.0458e-130	9.73053e-129	588.241
[UP]	scaffold_000010F_transcript_id_22706seq_length_2501	2.2547	1.17294	6.22584	1.43124e-64	1.37331e-63	287.893
[UP]	scaffold_000372F_transcript_id_2626seq_length_1901	21.8395	4.44887	6.22407	0	0	1949.74
[UP]	scaffold_000222F_transcript_id_D3TRQ9.1seq_length_951	2.87245	1.52228	6.7513	1.19149e-143	2.05629e-142	651.255
[UP]	scaffold_000097F_transcript_id_11262seq_length_2114	2.18397	1.12695	8.56601	1.72117e-61	1.58477e-60	273.758
[UP]	scaffold_000004F_transcript_id_23257seq_length_1277	3.74529	1.90508	8.0585	0	0	1717.82
[UP]	scaffold_000116F_transcript_id_C4WUU8.1seq_length_366	2.13452	1.09391	6.34779	1.353e-61	1.24922e-60	274.238
[UP]	scaffold_000321F_transcript_id_15149seq_length_4935	2.67775	1.42102	1.17875	0.000720474	0.00129698	11.4357
[UP]	scaffold_000052F_transcript_id_17144seq_length_1706	11.6737	3.54519	5.63673	1.94346e-233	4.55305e-232	1064.25
[UP]	scaffold_000752F_transcript_id_47seq_length_1892	2.24283	1.16532	6.26953	1.20589e-65	1.17507e-64	292.824
[UP]	scaffold_000158F_transcript_id_8450seq_length_1080	2.00482	1.00347	4.37509	5.47271e-15	1.96684e-14	61.0827
[UP]	scaffold_000036F_transcript_id_17880seq_length_1479	2.52545	1.33654	3.20847	1.32001e-11	4.06004e-11	45.7845
[UP]	scaffold_000189F_transcript_id_4916seq_length_1779	10.3872	3.37674	1.07921	4.53115e-10	1.29037e-09	38.8695
[UP]	scaffold_000163F_transcript_id_7514seq_length_1872	2.49932	1.32153	1.74759	8.1712e-05	0.000162437	15.5183
[UP]	scaffold_000087F_transcript_id_9984seq_length_1515	6.36408	2.66995	1.20259	1.56702e-08	4.09074e-08	31.9684
[UP]	scaffold_000097F_transcript_id_12127seq_length_2356	26.6943	4.73846	5.98563	0	0	1740.73
[UP]	scaffold_000131F_transcript_id_13094seq_length_1731	22.1086	4.46654	4.6916	1.00837e-151	1.80875e-150	688.375
[UP]	scaffold_000021F_transcript_id_18341seq_length_888	2.93959	1.55561	6.10449	5.9061e-98	7.67104e-97	441.209
[UP]	scaffold_000002F_transcript_id_24747seq_length_2299	7.57637	2.92151	1.71479	2.94468e-13	9.77367e-13	53.2448
[UP]	scaffold_000056F_transcript_id_11553seq_length_2628	2.30059	1.202	0.85683	0.0105627	0.0164434	6.53745
[UP]	scaffold_000047F_transcript_id_19389seq_length_2079	2.61535	1.38701	0.62942	0.00800285	0.0127352	7.03284
[UP]	scaffold_000020F_transcript_id_22802seq_length_1871	8.88912	3.15204	8.90061	0	0	6078.07
[UP]	scaffold_000035F_transcript_id_20875seq_length_2754	9.29375	3.21626	4.12971	1.27981e-75	1.37986e-74	338.612
[UP]	scaffold_000006F_transcript_id_25484seq_length_2344	4.82849	2.27157	0.731297	3.03833e-05	6.26215e-05	17.3937
[UP]	scaffold_000194F_transcript_id_6377seq_length_3130	104.873	6.7125	0.359326	2.01017e-09	5.52369e-09	35.9638
[UP]	scaffold_000158F_transcript_id_8810seq_length_1053	4.72218	2.23945	6.85304	7.08916e-288	1.92637e-286	1314.74
[UP]	scaffold_000182F_transcript_id_3502seq_length_2313	2.01492	1.01072	6.30852	4.96891e-52	4.08722e-51	230.363
[UP]	scaffold_000125F_transcript_id_12380seq_length_3786	4.98838	2.31857	0.0267575	0.00181321	0.0031148	9.72963
[UP]	scaffold_000265F_transcript_id_14175seq_length_5722	2.13771	1.09607	0.795431	0.0220407	0.032405	5.24257
[UP]	scaffold_000055F_transcript_id_12714seq_length_2141	3.07746	1.62174	6.20599	1.23786e-51	1.0124e-50	228.545
[UP]	scaffold_000004F_transcript_id_24016seq_length_1920	3.24076	1.69633	2.94426	3.20685e-14	1.11302e-13	57.6033
[UP]	scaffold_000050F_transcript_id_19045seq_length_1447	24.8454	4.63491	7.38019	0	0	4303.38
[UP]	scaffold_000133F_transcript_id_15433seq_length_1270	11.5352	3.52797	9.6334	1.56311e-201	3.25848e-200	917.47
[UP]	scaffold_000022F_transcript_id_20725seq_length_1567	2.76389	1.4667	7.14952	1.31021e-173	2.52644e-172	789.029
[UP]	scaffold_000000F_transcript_id_26531seq_length_1042	3.06124	1.61411	5.37889	1.14835e-64	1.10398e-63	288.332
[UP]	scaffold_000025F_transcript_id_19985seq_length_1509	22.2092	4.47309	8.17526	0	0	6260.61
[UP]	scaffold_000035F_transcript_id_20201seq_length_1042	3.09236	1.62871	5.36839	3.42074e-65	3.30123e-64	290.745
[UP]	scaffold_000166F_transcript_id_2079seq_length_2654	2.77194	1.4709	8.33082	0	0	1549.07
[UP]	scaffold_000234F_transcript_id_1249seq_length_548	4.25741	2.08998	6.83268	1.55953e-255	3.86108e-254	1165.92
[UP]	scaffold_000007F_transcript_id_25430seq_length_2343	2.17585	1.12158	5.76656	2.78151e-44	2.04324e-43	194.848
[UP]	scaffold_000026F_transcript_id_19331seq_length_2149	2.77436	1.47215	8.60805	8.90962e-278	2.3448e-276	1268.26
[UP]	scaffold_000067F_transcript_id_13392seq_length_3644	3.61206	1.85282	0.629417	0.000664178	0.00119952	11.5869
[UP]	scaffold_000114F_transcript_id_14086seq_length_1706	22.7849	4.51001	6.78392	0	0	2858.83
[UP]	scaffold_000209F_transcript_id_10121seq_length_2362	39.1321	5.29028	1.88655	1.10676e-24	5.42663e-24	105.195
[UP]	scaffold_000167F_transcript_id_17040seq_length_2235	14.1975	3.82757	1.10475	1.77277e-11	5.40456e-11	45.2069
[UP]	scaffold_000115F_transcript_id_761seq_length_2580	22.063	4.46356	9.43545	0	0	9096.09
[UP]	scaffold_000459F_transcript_id_428seq_length_2249	18.8347	4.23532	6.69958	0	0	2570.14
[UP]	scaffold_000192F_transcript_id_12834seq_length_567	6.9155	2.78983	5.54651	1.27804e-165	2.39083e-164	752.285
[UP]	scaffold_000114F_transcript_id_14106seq_length_1442	55.9821	5.80689	2.35928	7.78753e-36	4.95153e-35	156.166
[UP]	scaffold_000043F_transcript_id_17086seq_length_1714	5.54523	2.47125	9.03786	0	0	4527.34
[UP]	scaffold_000433F_transcript_id_2982seq_length_2548	5.55097	2.47274	7.26063	0	0	1699.05
[UP]	scaffold_000261F_transcript_id_4812seq_length_2772	2.27276	1.18445	6.08142	7.49839e-60	6.76745e-59	266.237
[UP]	scaffold_000087F_transcript_id_10131seq_length_594	18.769	4.23028	7.12363	0	0	3389.58
[UP]	scaffold_000572F_transcript_id_8059seq_length_1089	3.61206	1.85282	0.62942	0.000664181	0.00119952	11.5869
[UP]	scaffold_000027F_transcript_id_21818seq_length_1376	2.23355	1.15934	6.07982	1.53515e-57	1.35501e-56	255.634
[UP]	scaffold_000000F_transcript_id_26637seq_length_2370	2.72994	1.44887	7.17498	2.17591e-154	3.94536e-153	700.635
[UP]	scaffold_000316F_transcript_id_3803seq_length_5058	4.04174	2.01498	2.29421	4.63906e-12	1.46001e-11	47.8339
[UP]	scaffold_000043F_transcript_id_17129seq_length_663	19.6215	4.29437	1.02674	6.50723e-12	2.02886e-11	47.1705
[UP]	scaffold_000109F_transcript_id_5445seq_length_2917	3.41606	1.77233	0.731298	0.000621886	0.00112699	11.7093
[UP]	scaffold_000154F_transcript_id_13372seq_length_2781	3.04675	1.60727	0.76372	0.00141711	0.0024669	10.1834
[UP]	scaffold_000675F_transcript_id_P42660.3seq_length_1626	20.2165	4.33746	9.28765	0	0	7846.94
[UP]	scaffold_000148F_transcript_id_2073seq_length_1819	31.7619	4.98922	7.84333	0	0	6085.51
[UP]	scaffold_000094F_transcript_id_20120seq_length_1742	8.47638	3.08345	6.74296	0	0	1901.8
[UP]	scaffold_000005F_transcript_id_A0A0K8TPE4.1seq_length_543	2.8907	1.53142	4.19064	4.33178e-27	2.26577e-26	116.184
[UP]	scaffold_000462F_transcript_id_1884seq_length_3290	4.41164	2.14131	5.9519	5.72886e-149	1.01311e-147	675.709
[UP]	scaffold_000059F_transcript_id_15498seq_length_1370	5.92863	2.5677	4.61155	5.30495e-79	5.94997e-78	354.144
[UP]	scaffold_000175F_transcript_id_4828seq_length_3037	2.32769	1.2189	1.68125	0.000357371	0.000668912	12.7429
[UP]	scaffold_000328F_transcript_id_1417seq_length_1950	9.33371	3.22245	9.21398	0	0	6683.77
[UP]	scaffold_000039F_transcript_id_22366seq_length_519	2.93238	1.55207	0.593797	0.00390651	0.00645741	8.32677
[UP]	scaffold_000050F_transcript_id_20174seq_length_2678	2.06448	1.04578	4.0466	4.22206e-13	1.39075e-12	52.5371
[UP]	scaffold_000050F_transcript_id_20236seq_length_2228	23.7536	4.57008	3.16053	3.99152e-54	3.38032e-53	239.97
[UP]	scaffold_000514F_transcript_id_626seq_length_1651	11.9312	3.57667	5.09337	2.93744e-163	5.43427e-162	741.425
[UP]	scaffold_000038F_transcript_id_8849seq_length_916	19.2255	4.26495	5.35766	5.95571e-230	1.37599e-228	1048.21
[UP]	scaffold_000025F_transcript_id_20202seq_length_3681	10.9949	3.45877	8.99258	0	0	7000.81
[UP]	scaffold_000000F_transcript_id_27015seq_length_2326	23.0905	4.52923	8.23332	0	0	6726.41
[UP]	scaffold_000105F_transcript_id_16627seq_length_3167	3.86123	1.94906	2.06626	5.86113e-10	1.65315e-09	38.3671
[UP]	scaffold_000025F_transcript_id_20002seq_length_1398	31.3256	4.96927	13.5728	0	0	7345.22
[UP]	scaffold_000094F_transcript_id_18788seq_length_1103	2.04558	1.03251	7.76911	2.96811e-128	4.6868e-127	580.467
[UP]	scaffold_000369F_transcript_id_372seq_length_1439	11.3778	3.50815	6.87484	0	0	2405.36
[UP]	scaffold_000144F_transcript_id_12108seq_length_1500	32.7803	5.03476	4.20833	1.84306e-118	2.77067e-117	535.449
[UP]	scaffold_000354F_transcript_id_13753seq_length_3231	4.07308	2.02612	3.63373	3.56797e-29	1.94965e-28	125.705
[UP]	scaffold_000018F_transcript_id_24427seq_length_1903	2.07474	1.05293	6.86266	8.49394e-80	9.70031e-79	357.798
[UP]	scaffold_000006F_transcript_id_25489seq_length_1209	11.1952	3.48481	2.45173	2.45627e-26	1.25339e-25	112.743
[UP]	scaffold_000175F_transcript_id_4905seq_length_4095	3.1544	1.65736	9.35908	2.24099e-133	3.68368e-132	604.015
[UP]	scaffold_000496F_transcript_id_6795seq_length_1588	9.60108	3.2632	4.58682	7.37128e-105	1.00697e-103	472.933
[UP]	scaffold_000064F_transcript_id_18038seq_length_1564	13.3954	3.74366	9.45083	6.54444e-117	9.67862e-116	528.323
[UP]	scaffold_000043F_transcript_id_15022seq_length_3276	5.28911	2.40303	1.77964	6.07845e-11	1.8118e-10	42.7951
[UP]	scaffold_000257F_transcript_id_7658seq_length_2880	13.3959	3.74372	7.77206	0	0	4578.52
[UP]	scaffold_000004F_transcript_id_23927seq_length_3610	6.24342	2.64234	7.97043	0	0	3399.68
[UP]	scaffold_000017F_transcript_id_23156seq_length_1804	13.4136	3.74563	0.59379	6.16314e-08	1.55858e-07	29.3114
[UP]	scaffold_000109F_transcript_id_5536seq_length_1791	34.8904	5.12476	7.1189	0	0	3890.31
[UP]	scaffold_000025F_transcript_id_19851seq_length_2356	2.07462	1.05285	6.67197	1.08608e-70	1.10897e-69	315.983
[UP]	scaffold_000196F_transcript_id_7431seq_length_2566	5.06458	2.34044	8.66265	0	0	3722.25
[UP]	scaffold_000131F_transcript_id_13939seq_length_3346	3.95144	1.98238	7.6164	0	0	1768.8
[UP]	scaffold_000004F_transcript_id_23882seq_length_1625	4.51584	2.17499	7.52007	0	0	1928.06
[UP]	scaffold_000623F_transcript_id_4338seq_length_1987	2.35899	1.23817	1.57564	0.000502173	0.000921707	12.1076
[UP]	scaffold_001089F_transcript_id_3230seq_length_2432	2.64066	1.4009	1.68125	5.1475e-05	0.000104376	16.393
[UP]	scaffold_001070F_transcript_id_410seq_length_3178	17.9475	4.16571	4.35915	2.40963e-114	3.51182e-113	516.528
[UP]	scaffold_000048F_transcript_id_17225seq_length_1980	2.61535	1.38701	0.629421	0.00800285	0.0127352	7.03284
[UP]	scaffold_001298F_transcript_id_1400seq_length_3309	2.53774	1.34354	1.12985	0.00160496	0.00277369	9.95405
[UP]	scaffold_000552F_transcript_id_84seq_length_1893	2.20881	1.14327	4.64682	3.06757e-22	1.40514e-21	94.0558
[UP]	scaffold_000002F_transcript_id_25263seq_length_1340	4.46293	2.15799	6.7782	3.23527e-259	8.13033e-258	1182.86
[UP]	scaffold_000097F_transcript_id_10892seq_length_3255	5.47095	2.45179	6.58086	1.39934e-275	3.63503e-274	1258.16
[UP]	scaffold_000675F_transcript_id_830seq_length_2390	22.837	4.5133	4.40866	4.46763e-126	6.95604e-125	570.456
[UP]	scaffold_000002F_transcript_id_24678seq_length_2013	2.03826	1.02734	5.39587	7.9859e-30	4.44612e-29	128.676
[UP]	scaffold_000044F_transcript_id_15910seq_length_2201	13.1187	3.71355	7.35023	0	0	3474.06
[UP]	scaffold_000262F_transcript_id_10998seq_length_3094	3.1433	1.65228	6.93235	1.1403e-185	2.28676e-184	844.501
[UP]	scaffold_000078F_transcript_id_18633seq_length_2759	2.74678	1.45774	1.51979	7.95963e-05	0.000158576	15.5679
[UP]	scaffold_000265F_transcript_id_14289seq_length_3156	12.9717	3.6973	-0.0842759	6.61276e-05	0.000132559	15.9185
[UP]	scaffold_000197F_transcript_id_8848seq_length_1195	18.2898	4.19297	2.04002	1.69646e-23	8.00487e-23	99.7876
[UP]	scaffold_000038F_transcript_id_7746seq_length_2947	28.2192	4.81861	4.35382	3.26469e-127	5.12302e-126	575.68
[UP]	scaffold_000009F_transcript_id_27116seq_length_2662	2.34817	1.23154	1.22606	0.00246865	0.00417517	9.16368
[UP]	scaffold_000242F_transcript_id_16208seq_length_903	24.4617	4.61245	8.51627	0	0	7849.31
[UP]	scaffold_000045F_transcript_id_18841seq_length_1902	28.2192	4.81861	4.35382	3.26479e-127	5.12302e-126	575.68
[UP]	scaffold_000491F_transcript_id_3877seq_length_1679	26.4798	4.72682	3.91558	5.04999e-93	6.36934e-92	418.549
[UP]	scaffold_000025F_transcript_id_19215seq_length_2493	5.43969	2.44353	1.811	2.08995e-11	6.34644e-11	44.8846
[UP]	scaffold_000587F_transcript_id_1126seq_length_2650	3.76643	1.9132	7.40317	5.48306e-56	4.76005e-55	248.511
[UP]	scaffold_000080F_transcript_id_10553seq_length_3188	10.315	3.36668	8.07103	0	0	4919.94
[UP]	scaffold_000012F_transcript_id_21526seq_length_1531	2.02252	1.01615	6.20464	9.5589e-14	3.24027e-13	55.4557
[UP]	scaffold_000045F_transcript_id_19157seq_length_999	2.09867	1.06947	5.56634	9.55572e-36	6.06809e-35	155.759
[UP]	scaffold_000128F_transcript_id_15577seq_length_1392	2.74475	1.45667	5.78735	4.40262e-71	4.51381e-70	317.783
[UP]	scaffold_000346F_transcript_id_6516seq_length_1902	2.19576	1.13472	7.13574	1.08468e-108	1.5254e-107	490.545
[UP]	scaffold_000170F_transcript_id_2783seq_length_1816	2.88276	1.52745	5.89735	4.58713e-39	3.08485e-38	170.951
[UP]	scaffold_000004F_transcript_id_24386seq_length_2357	3.07689	1.62147	6.34903	2.49625e-123	3.83894e-122	557.827
[UP]	scaffold_000327F_transcript_id_4390seq_length_2335	13.7075	3.77689	3.52915	2.08791e-59	1.87258e-58	264.197
[UP]	scaffold_000018F_transcript_id_23834seq_length_1049	15.474	3.95177	4.3485	2.15867e-108	3.02727e-107	489.171
[UP]	scaffold_000247F_transcript_id_8532seq_length_2556	22.6349	4.50048	8.07355	1.65555e-87	2.01948e-86	393.211
[UP]	scaffold_000158F_transcript_id_8226seq_length_3333	2.83929	1.50553	1.40114	0.000104783	0.000206213	15.0485
[UP]	scaffold_000114F_transcript_id_14159seq_length_1599	25.0517	4.64684	9.87415	8.76063e-126	1.3598e-124	569.112
[UP]	scaffold_000636F_transcript_id_W8BF78.1seq_length_1476	19.0591	4.25241	3.47144	2.18058e-63	2.06076e-62	282.464
[UP]	scaffold_000097F_transcript_id_10898seq_length_3252	4.10052	2.03581	6.24591	1.59572e-46	1.21306e-45	205.118
[UP]	scaffold_001171F_transcript_id_7242seq_length_1382	24.1472	4.59378	0.557264	5.37527e-09	1.44305e-08	34.0486
[UP]	scaffold_000167F_transcript_id_17654seq_length_1268	6.58577	2.71935	-0.640665	0.0129245	0.0198672	6.17941
[UP]	scaffold_000103F_transcript_id_6018seq_length_3621	10.9946	3.45872	7.31345	0	0	3147.5
[UP]	scaffold_000000F_transcript_id_26742seq_length_1280	19.1013	4.2556	5.61799	1.15576e-273	2.98679e-272	1249.34
[UP]	scaffold_000371F_transcript_id_11576seq_length_4602	5.74826	2.52312	0.69813	8.89096e-06	1.92631e-05	19.736
[UP]	scaffold_000090F_transcript_id_19339seq_length_1917	2.14332	1.09985	1.71481	0.00101086	0.00179143	10.8076
[UP]	scaffold_000410F_transcript_id_14850seq_length_1635	2.12042	1.08435	4.2347	1.19222e-15	4.36931e-15	64.0841
[UP]	scaffold_000385F_transcript_id_11390seq_length_2407	2.72212	1.44473	8.47282	1.152e-142	1.97793e-141	646.725
[UP]	scaffold_000009F_transcript_id_26571seq_length_3141	4.34092	2.118	1.10475	4.37859e-06	9.72191e-06	21.0915
[UP]	scaffold_000109F_transcript_id_5603seq_length_2460	8.67203	3.11637	0.557266	1.46995e-06	3.39457e-06	23.1869
[UP]	scaffold_000210F_transcript_id_13196seq_length_1709	104.873	6.7125	0.359326	2.01017e-09	5.52369e-09	35.9638
[UP]	scaffold_000094F_transcript_id_20075seq_length_4060	2.6311	1.39567	7.55046	1.85715e-204	3.90391e-203	930.927
[UP]	scaffold_000189F_transcript_id_4916seq_length_1779	25.7437	4.68615	0.629413	1.38747e-09	3.85273e-09	36.6864
[UP]	scaffold_000038F_transcript_id_7684seq_length_1579	15.5852	3.96211	3.29968	4.52902e-53	3.77494e-52	235.133
[UP]	scaffold_000037F_transcript_id_18717seq_length_2153	11.938	3.57749	9.64402	2.71145e-254	6.69648e-253	1160.21
[UP]	scaffold_000621F_transcript_id_4078seq_length_1630	13.3558	3.73939	5.39953	4.98926e-210	1.07125e-208	956.554
[UP]	scaffold_000106F_transcript_id_12353seq_length_1150	2.03133	1.02242	2.53864	3.20431e-05	6.58664e-05	17.2926
[UP]	scaffold_000140F_transcript_id_6884seq_length_2081	52.884	5.72476	1.50066	1.21374e-19	5.11783e-19	82.2261
[UP]	scaffold_000773F_transcript_id_W8BDJ5.1seq_length_384	3.48659	1.80182	2.19071	1.20149e-09	3.34833e-09	36.9669
[UP]	scaffold_000038F_transcript_id_7738seq_length_2577	4.74366	2.246	1.55726	1.05514e-08	2.78492e-08	32.7369
[UP]	scaffold_000035F_transcript_id_20753seq_length_2471	9.89992	3.30742	0.698126	1.24262e-07	3.08945e-07	27.9536
[UP]	scaffold_000299F_transcript_id_7947seq_length_1137	30.509	4.93116	10.883	0	0	1789.82
[UP]	scaffold_000000F_transcript_id_27021seq_length_1680	21.2007	4.40604	8.03923	5.76168e-53	4.79041e-52	234.653
[UP]	scaffold_000067F_transcript_id_12394seq_length_2311	2.50283	1.32356	6.82133	1.53684e-117	2.28634e-116	531.215
[UP]	scaffold_000341F_transcript_id_2962seq_length_1083	2.08586	1.06064	1.33796	0.00590471	0.0095556	7.57916
[UP]	scaffold_000443F_transcript_id_10959seq_length_825	2.96935	1.57015	4.86419	5.98768e-44	4.36009e-43	193.322
[UP]	scaffold_000851F_transcript_id_1818seq_length_1896	18.7294	4.22723	5.9456	0	0	1550.89
[UP]	scaffold_000457F_transcript_id_4190seq_length_1932	2.64854	1.4052	5.91731	1.00621e-72	1.04661e-71	325.317
[UP]	scaffold_000006F_transcript_id_25914seq_length_1414	25.8288	4.69091	9.44491	0	0	10441
[UP]	scaffold_000784F_transcript_id_3556seq_length_2968	12.3693	3.62869	5.48827	2.23727e-216	4.91955e-215	985.759
[UP]	scaffold_000766F_transcript_id_550seq_length_1703	24.49	4.61412	7.2088	0	0	3839.67
[UP]	scaffold_000053F_transcript_id_15829seq_length_1637	3.37428	1.75458	4.52204	4.84298e-42	3.42217e-41	184.582
[UP]	scaffold_000035F_transcript_id_20720seq_length_3762	2.85446	1.51322	1.9861	1.19064e-06	2.76612e-06	23.5923
[UP]	scaffold_000079F_transcript_id_14902seq_length_2783	13.7782	3.78432	3.3107	2.87013e-51	2.32838e-50	226.87
[UP]	scaffold_000116F_transcript_id_18428seq_length_1678	7.19761	2.84752	8.35659	0	0	4434.27
[UP]	scaffold_000144F_transcript_id_12125seq_length_2391	2.30948	1.20757	1.35933	0.00174367	0.00300255	9.80152
[UP]	scaffold_000199F_transcript_id_10517seq_length_2398	18.8941	4.23986	7.51118	0	0	4235.07
[UP]	scaffold_000067F_transcript_id_13445seq_length_1607	10.7946	3.43224	5.87786	4.18752e-265	1.06569e-263	1209.95
[UP]	scaffold_000141F_transcript_id_10567seq_length_1202	3.25959	1.70469	2.72305	1.91402e-12	6.13353e-12	49.5702
[UP]	scaffold_000012F_transcript_id_22025seq_length_3231	2.70073	1.43335	9.15855	7.29109e-230	1.68064e-228	1047.81
[UP]	scaffold_000114F_transcript_id_14827seq_length_1143	2.02146	1.0154	5.67579	5.84897e-35	3.66319e-34	152.159
[UP]	scaffold_000616F_transcript_id_9297seq_length_2551	2.12814	1.08959	2.43172	0.00970895	0.0152017	6.68753
[UP]	scaffold_000069F_transcript_id_9261seq_length_1338	2.23899	1.16285	2.8417	1.70584e-07	4.19741e-07	27.3407
[UP]	scaffold_000285F_transcript_id_11453seq_length_1620	2.40409	1.26549	5.401	3.16711e-43	2.27483e-42	190.008
[UP]	scaffold_000000F_transcript_id_26487seq_length_1814	19.2215	4.26465	6.66354	0	0	2524.33
[UP]	scaffold_000213F_transcript_id_8398seq_length_1668	2.27258	1.18433	2.46167	3.53153e-06	7.90416e-06	21.5037
[UP]	scaffold_000324F_transcript_id_4879seq_length_2979	4.41467	2.14231	3.2548	1.2253e-24	5.99907e-24	104.994
[UP]	scaffold_000067F_transcript_id_12124seq_length_2906	2.15903	1.11038	7.87046	2.34857e-164	4.36904e-163	746.471
[UP]	scaffold_000127F_transcript_id_12863seq_length_2676	4.60812	2.20418	0.48132	0.000240445	0.000456532	13.4853
[UP]	scaffold_000366F_transcript_id_7972seq_length_2107	23.6451	4.56347	5.43892	3.54461e-256	8.8193e-255	1168.88
[UP]	scaffold_000283F_transcript_id_3703seq_length_3254	19.3577	4.27484	0.316258	3.09228e-07	7.49669e-07	26.1912
[UP]	scaffold_000078F_transcript_id_18867seq_length_2690	15.5408	3.95799	7.89091	0	0	5208.48
[UP]	scaffold_000019F_transcript_id_23085seq_length_2724	3.68562	1.88191	6.667	3.04356e-194	6.25364e-193	883.939
[UP]	scaffold_000439F_transcript_id_6669seq_length_1252	2.08586	1.06064	1.33796	0.00590468	0.0095556	7.57916
[UP]	scaffold_000018F_transcript_id_24312seq_length_1685	4.6161	2.20667	3.14218	7.37584e-24	3.52515e-23	101.437
[UP]	scaffold_000001F_transcript_id_25809seq_length_3286	2.48804	1.31501	7.01508	8.11186e-41	5.6328e-40	178.975
[UP]	scaffold_000266F_transcript_id_9149seq_length_1664	18.0883	4.17699	3.29969	1.55678e-55	1.34452e-54	246.432
[UP]	scaffold_000012F_transcript_id_22083seq_length_1670	2.18967	1.13071	6.03655	1.68365e-53	1.41154e-52	237.104
[UP]	scaffold_000000F_transcript_id_26184seq_length_1224	2.27913	1.18849	2.17875	2.71689e-05	5.61465e-05	17.6063
[UP]	scaffold_000022F_transcript_id_20344seq_length_2543	4.79266	2.26083	7.98389	0	0	2730.24
[UP]	scaffold_000052F_transcript_id_16715seq_length_6781	25.6603	4.68146	10.1288	0	0	7323.8
[UP]	scaffold_000241F_transcript_id_5875seq_length_1776	29.5347	4.88434	7.17832	0	0	3919.93
[UP]	scaffold_000117F_transcript_id_15517seq_length_1735	4.20295	2.0714	1.7148	1.16444e-08	3.06211e-08	32.5453
[UP]	scaffold_000050F_transcript_id_20223seq_length_2242	25.861	4.6927	7.88281	4.99023e-115	7.31536e-114	519.671
[UP]	scaffold_000171F_transcript_id_11471seq_length_1758	9.53833	3.25374	2.5756	1.15983e-26	5.98845e-26	114.231
[UP]	scaffold_000489F_transcript_id_4291seq_length_1704	2.29315	1.19733	1.42161	0.00146439	0.00254214	10.1229
[UP]	scaffold_000020F_transcript_id_23699seq_length_1801	14.0609	3.81362	6.05439	5.01394e-27	2.61712e-26	115.894
[UP]	scaffold_000523F_transcript_id_5483seq_length_1157	3.26244	1.70595	0.826455	0.000571167	0.00104072	11.8677
[UP]	scaffold_000031F_transcript_id_18900seq_length_1302	8.92042	3.15711	2.75563	3.8982e-29	2.12662e-28	125.529
[UP]	scaffold_001030F_transcript_id_6136seq_length_5127	2.13056	1.09123	6.99266	1.32672e-30	7.50309e-30	132.239
[UP]	scaffold_000449F_transcript_id_87seq_length_2525	3.95267	1.98283	5.45155	8.08369e-95	1.02993e-93	426.799
[UP]	scaffold_000300F_transcript_id_8646seq_length_2564	10.2367	3.35568	7.5553	0	0	3550.55
[UP]	scaffold_000009F_transcript_id_26814seq_length_2949	26.1494	4.70871	8.72175	0	0	7630.43
[UP]	scaffold_000265F_transcript_id_14368seq_length_2008	24.1472	4.59378	0.557264	5.37527e-09	1.44305e-08	34.0486
[UP]	scaffold_000000F_transcript_id_27018seq_length_2251	9.40375	3.23324	4.48601	6.63959e-97	8.56823e-96	436.381
[UP]	scaffold_000075F_transcript_id_15571seq_length_1693	25.5663	4.67617	7.3505	0	0	4249.58
[UP]	scaffold_000054F_transcript_id_14960seq_length_1534	2.44088	1.2874	2.28308	2.73333e-06	6.1853e-06	21.9952
[UP]	scaffold_000129F_transcript_id_18323seq_length_1775	5.44498	2.44493	7.512	1.19917e-235	2.83587e-234	1074.42
[UP]	scaffold_000012F_transcript_id_22235seq_length_3149	4.11206	2.03986	1.17875	4.42564e-06	9.82419e-06	21.0711
[UP]	scaffold_000584F_transcript_id_3178seq_length_3817	4.09217	2.03287	1.40114	6.04459e-07	1.43623e-06	24.898
[UP]	scaffold_000023F_transcript_id_22725seq_length_1369	5.19299	2.37657	4.52674	5.53409e-67	5.45092e-66	298.966
[UP]	scaffold_000189F_transcript_id_4868seq_length_2224	2.13771	1.09607	0.79543	0.0220407	0.032405	5.24257
[UP]	scaffold_000114F_transcript_id_14897seq_length_2405	20.5747	4.3628	8.4251	0	0	7254.36
[UP]	scaffold_000031F_transcript_id_20256seq_length_1895	2.36861	1.24404	4.31619	8.83651e-21	3.85736e-20	87.4064
[UP]	scaffold_000022F_transcript_id_21644seq_length_1639	29.4067	4.87807	8.7645	0	0	8604.87
[UP]	scaffold_000090F_transcript_id_19681seq_length_2697	3.04483	1.60636	7.64668	8.63076e-151	1.53713e-149	684.087
[UP]	scaffold_000172F_transcript_id_7943seq_length_2764	25.0558	4.64707	5.08855	1.04428e-204	2.1998e-203	932.077
[UP]	scaffold_000069F_transcript_id_9784seq_length_3216	3.73308	1.90037	7.01831	2.4818e-25	1.23745e-24	108.158
[UP]	scaffold_000176F_transcript_id_11945seq_length_4145	2.64871	1.40529	3.73124	1.73278e-17	6.79492e-17	72.4275
[UP]	scaffold_000333F_transcript_id_10716seq_length_1170	10.7531	3.42668	0.359328	2.90789e-06	6.55812e-06	21.8764
[UP]	scaffold_000057F_transcript_id_17384seq_length_2586	2.30044	1.20191	7.37873	1.69051e-140	2.87789e-139	636.763
[UP]	scaffold_000730F_transcript_id_10415seq_length_2349	17.2421	4.10786	7.8195	0	0	5154.02
[UP]	scaffold_000001F_transcript_id_25728seq_length_1209	20.5476	4.3609	5.11706	6.65909e-199	1.38528e-197	905.375
[UP]	scaffold_000434F_transcript_id_1167seq_length_1431	19.762	4.30466	9.12275	0	0	8720.48
[UP]	scaffold_000584F_transcript_id_3177seq_length_3602	2.37206	1.24614	7.60348	8.1768e-35	5.09564e-34	151.493
[UP]	scaffold_000131F_transcript_id_13522seq_length_4295	2.6426	1.40196	7.3718	2.46458e-85	2.94545e-84	383.23
[UP]	scaffold_000002F_transcript_id_24797seq_length_1189	2.03611	1.02582	7.06194	3.02548e-86	3.64183e-85	387.414
[UP]	scaffold_000675F_transcript_id_830seq_length_2390	21.5322	4.42843	6.00863	0	0	1680.85
[UP]	scaffold_000010F_transcript_id_21760seq_length_541	3.34791	1.74326	7.39582	3.97178e-86	4.77518e-85	386.871
[UP]	scaffold_000304F_transcript_id_6635seq_length_1521	4.95748	2.30961	5.48228	4.68433e-122	7.14913e-121	551.974
[UP]	scaffold_001056F_transcript_id_3214seq_length_2085	4.28834	2.10042	9.65486	0	0	4041.83
[UP]	scaffold_000210F_transcript_id_13170seq_length_2125	21.4458	4.42263	5.82025	2.0E-323	5.83E-322	1478.54
[UP]	scaffold_000064F_transcript_id_A0A0K8TPH9.1seq_length_288	2.36797	1.24365	3.28306	7.6093e-11	2.25468e-10	42.3557
[UP]	scaffold_000079F_transcript_id_14927seq_length_2157	3.78595	1.92066	6.96096	1.07355e-242	2.59386e-241	1106.85
[UP]	scaffold_000040F_transcript_id_19413seq_length_1597	5.5416	2.4703	3.94772	6.79415e-48	5.2851e-47	211.401
[UP]	scaffold_000262F_transcript_id_10300seq_length_2185	3.27781	1.71273	1.17875	6.97059e-05	0.000139481	15.8188
[UP]	scaffold_000303F_transcript_id_4248seq_length_2673	9.13068	3.19072	7.23333	0	0	2726.09
[UP]	scaffold_000265F_transcript_id_14251seq_length_2435	5.16533	2.36886	1.53864	3.3924e-09	9.23332e-09	34.9445
[UP]	scaffold_000653F_transcript_id_6586seq_length_2295	4.7612	2.25133	4.76155	1.61534e-72	1.67845e-71	324.374
[UP]	scaffold_000210F_transcript_id_13196seq_length_1709	22.5507	4.4951	0.481316	2.07908e-08	5.37846e-08	31.4193
[UP]	scaffold_000021F_transcript_id_20121seq_length_1355	2.02984	1.02137	4.26333	2.09774e-14	7.32128e-14	58.4382
[UP]	scaffold_000612F_transcript_id_2755seq_length_7219	2.5334	1.34107	6.5201	3.79101e-99	4.98198e-98	446.689
[UP]	scaffold_000118F_transcript_id_11622seq_length_1186	6.31324	2.65838	5.30778	2.36632e-132	3.8518e-131	599.309
[UP]	scaffold_000126F_transcript_id_14806seq_length_1769	2.11475	1.08049	7.86836	1.26897e-79	1.43774e-78	356.997
[UP]	scaffold_000729F_transcript_id_7237seq_length_1690	2.08418	1.05948	4.70432	3.09868e-20	1.33178e-19	84.9252
[UP]	scaffold_000194F_transcript_id_6377seq_length_3130	9.54828	3.25524	2.9929	2.11586e-35	1.33516e-34	154.18
[UP]	scaffold_000081F_transcript_id_15993seq_length_2249	3.12995	1.64614	2.93716	1.59171e-13	5.33425e-13	54.4535
[UP]	scaffold_000617F_transcript_id_75seq_length_1008	3.73016	1.89924	3.98946	1.81025e-33	1.09942e-32	145.339
[UP]	scaffold_000033F_transcript_id_21027seq_length_2192	24.892	4.63761	5.38004	4.29484e-249	1.04779e-247	1136.28
[UP]	scaffold_000184F_transcript_id_13183seq_length_1350	2.30681	1.2059	5.17712	2.40609e-34	1.49017e-33	149.349
[UP]	scaffold_000102F_transcript_id_15334seq_length_887	3.36324	1.74985	5.92714	2.77432e-32	1.63252e-31	139.918
[UP]	scaffold_000232F_transcript_id_5010seq_length_2628	18.2018	4.18601	3.50538	4.78134e-64	4.56595e-63	285.489
[UP]	scaffold_000270F_transcript_id_6432seq_length_1320	19.3072	4.27107	1.82643	1.3778e-20	5.97027e-20	86.5279
[UP]	scaffold_000359F_transcript_id_4488seq_length_2409	21.9904	4.4588	7.06023	0	0	3395.96
[UP]	scaffold_000418F_transcript_id_8178seq_length_1910	15.6064	3.96407	8.37409	0	0	6376.36
[UP]	scaffold_000085F_transcript_id_13746seq_length_3598	17.1775	4.10245	3.68114	5.14021e-71	5.25927e-70	317.475
[UP]	scaffold_000037F_transcript_id_18173seq_length_1380	2.15039	1.1046	0.698135	0.0266946	0.0388316	4.91046
[UP]	scaffold_000253F_transcript_id_4261seq_length_5942	2.61535	1.38701	0.62942	0.00800285	0.0127352	7.03284
[UP]	scaffold_000060F_transcript_id_14024seq_length_4221	2.69053	1.42789	0.519797	0.00934826	0.0146782	6.75505
[UP]	scaffold_000100F_transcript_id_15584seq_length_1425	2.42811	1.27983	0.999787	0.00413317	0.00681521	8.22436
[UP]	scaffold_000217F_transcript_id_13148seq_length_1131	3.66642	1.87437	6.75828	9.89334e-205	2.08843e-203	932.185
[UP]	scaffold_000063F_transcript_id_17083seq_length_1636	2.45334	1.29474	5.32157	1.036e-42	7.38834e-42	187.65
[UP]	scaffold_000122F_transcript_id_13981seq_length_2980	23.669	4.56493	8.30607	1.46204e-77	1.61275e-76	347.53
[UP]	scaffold_000103F_transcript_id_5972seq_length_1228	2.20079	1.13802	6.72334	9.24207e-19	3.79019e-18	78.2149
[UP]	scaffold_000007F_transcript_id_24939seq_length_3633	12.8646	3.68534	9.92576	0	0	9125.48
[UP]	scaffold_000087F_transcript_id_10154seq_length_546	31.5041	4.97747	4.85092	1.9829e-182	3.92935e-181	829.597
[UP]	scaffold_000194F_transcript_id_6377seq_length_3130	8.45344	3.07954	4.70629	2.60547e-106	3.59355e-105	479.604
[UP]	scaffold_000262F_transcript_id_10812seq_length_1753	3.54273	1.82486	6.98694	2.39223e-212	5.16958e-211	967.224
[UP]	scaffold_000005F_transcript_id_W8B7H5.1seq_length_5361	5.38297	2.4284	2.67271	6.06348e-20	2.58058e-19	83.598
[UP]	scaffold_000001F_transcript_id_25413seq_length_2773	3.87078	1.95263	0.519795	0.000691133	0.00124663	11.5129
[UP]	scaffold_000101F_transcript_id_11320seq_length_1692	21.9386	4.4554	8.35058	0	0	1938.84
[UP]	scaffold_000673F_transcript_id_1753seq_length_3039	26.0704	4.70434	9.42795	6.83055e-79	7.63544e-78	353.64
[UP]	scaffold_000086F_transcript_id_16183seq_length_1895	4.44299	2.15153	5.31603	2.92412e-98	3.80781e-97	442.612
[UP]	scaffold_000038F_transcript_id_7712seq_length_2145	8.05809	3.01044	0.481318	4.98475e-06	1.10141e-05	20.8431
[UP]	scaffold_000116F_transcript_id_18405seq_length_1124	3.72275	1.89637	1.07922	3.1455e-05	6.47107e-05	17.3278
[UP]	scaffold_000122F_transcript_id_13963seq_length_3366	17.191	4.10358	11.2466	0	0	10082.6
[UP]	scaffold_000188F_transcript_id_5843seq_length_1545	11.8479	3.56656	5.41492	2.63492e-202	5.50424e-201	921.027
[UP]	scaffold_000372F_transcript_id_2623seq_length_1529	2.26616	1.18025	2.49102	2.98383e-06	6.72032e-06	21.8269
[UP]	scaffold_000108F_transcript_id_14546seq_length_2352	2.92913	1.55047	9.18661	3.01594e-86	3.63472e-85	387.421
[UP]	scaffold_000194F_transcript_id_6372seq_length_2237	22.0441	4.46232	7.89636	0	0	5801.56
[UP]	scaffold_000106F_transcript_id_12690seq_length_4221	2.45372	1.29497	8.68376	5.63679e-305	1.61026e-303	1393.43
[UP]	scaffold_000019F_transcript_id_21652seq_length_1712	32.2614	5.01174	8.10131	0	0	6598.4
[UP]	scaffold_000113F_transcript_id_11813seq_length_3401	2.15043	1.10463	4.42661	3.1693e-18	1.27573e-17	75.781
[UP]	scaffold_000038F_transcript_id_7712seq_length_2145	8.05809	3.01044	0.481318	4.98475e-06	1.10141e-05	20.8431
[UP]	scaffold_000125F_transcript_id_12456seq_length_1759	2.25043	1.1702	5.92184	4.44534e-33	2.67387e-32	143.555
[UP]	scaffold_000000F_transcript_id_27025seq_length_5285	2.34817	1.23154	1.22606	0.00246865	0.00417517	9.16369
[UP]	scaffold_000009F_transcript_id_26660seq_length_2246	15.9682	3.99713	4.51722	7.32018e-123	1.12403e-121	555.679
[UP]	scaffold_000570F_transcript_id_480seq_length_2610	2.06324	1.04491	5.0775	4.63945e-25	2.29727e-24	106.918
[UP]	scaffold_000187F_transcript_id_11459seq_length_2362	4.20983	2.07376	6.58829	2.00774e-215	4.39554e-214	981.375
[UP]	scaffold_000030F_transcript_id_22612seq_length_1551	27.7635	4.79512	9.72092	0	0	8445.73
[UP]	scaffold_000017F_transcript_id_23077seq_length_1734	2.03783	1.02703	5.21573	1.47134e-26	7.57345e-26	113.759
[UP]	scaffold_000372F_transcript_id_2657seq_length_3524	21.9847	4.45843	10.6188	4.20692e-89	5.18216e-88	400.537
[UP]	scaffold_000000F_transcript_id_26473seq_length_2408	3.96258	1.98644	5.52074	1.4256e-99	1.88085e-98	448.64
[UP]	scaffold_000493F_transcript_id_1849seq_length_1757	2.64207	1.40167	4.20842	1.30049e-14	4.58028e-14	59.379
[UP]	scaffold_000112F_transcript_id_17100seq_length_3649	8.71855	3.12409	8.77515	0	0	2956.99
[UP]	scaffold_000324F_transcript_id_4879seq_length_2979	20.19	4.33557	2.16665	2.62348e-26	1.33735e-25	112.613
[UP]	scaffold_000119F_transcript_id_15765seq_length_2633	10.6096	3.4073	6.89327	0	0	2358.04
[UP]	scaffold_000161F_transcript_id_7209seq_length_1901	24.6125	4.62132	3.91197	2.47786e-91	3.09024e-90	410.781
[UP]	scaffold_000025F_transcript_id_20016seq_length_2596	35.3442	5.1434	11.195	0	0	12770.4
[UP]	scaffold_000072F_transcript_id_16454seq_length_1522	2.05766	1.04101	4.87355	7.3882e-22	3.334e-21	92.3161
[UP]	scaffold_000033F_transcript_id_21016seq_length_3027	21.1538	4.40284	6.42483	0	0	2211.41
[UP]	scaffold_000408F_transcript_id_4759seq_length_1258	2.77411	1.47202	3.70227	0.000428974	0.000792287	12.4016
[UP]	scaffold_000434F_transcript_id_U5EN01.1seq_length_1362	22.0193	4.4607	8.60484	0	0	6095.76
[UP]	scaffold_000113F_transcript_id_12310seq_length_2216	27.2669	4.76908	8.6009	1.6201e-256	4.05105e-255	1170.44
[UP]	scaffold_000000F_transcript_id_26392seq_length_2111	5.22298	2.38487	0.35933	0.000218244	0.000417223	13.6671
[UP]	scaffold_000005F_transcript_id_24110seq_length_3076	32.1296	5.00583	0.886567	6.08057e-12	1.90234e-11	47.3034
[UP]	scaffold_000507F_transcript_id_12673seq_length_2825	3.146	1.65352	6.23301	3.58245e-118	5.35339e-117	534.122
[UP]	scaffold_000020F_transcript_id_22891seq_length_2468	2.93602	1.55386	6.2765	2.12745e-109	2.99606e-108	493.796
[UP]	scaffold_000219F_transcript_id_11766seq_length_2324	22.0434	4.46227	7.90682	0	0	5839.68
[UP]	scaffold_000369F_transcript_id_371seq_length_2268	14.5834	3.86625	7.63595	0	0	4338
[UP]	scaffold_000019F_transcript_id_23052seq_length_1994	3.31876	1.73065	6.64925	2.8771e-92	3.60608e-91	415.077
[UP]	scaffold_000459F_transcript_id_437seq_length_1822	24.4915	4.61421	7.83217	0	0	5718.7
[UP]	scaffold_000140F_transcript_id_7367seq_length_1952	2.28313	1.19101	4.49337	1.27556e-21	5.70221e-21	91.2354
[UP]	scaffold_000135F_transcript_id_14472seq_length_2906	9.08502	3.18349	6.08441	1.77107e-279	4.69801e-278	1276.09
[UP]	scaffold_000379F_transcript_id_5642seq_length_2555	3.17422	1.6664	0.664184	0.00158091	0.00273401	9.98185
[UP]	scaffold_000103F_transcript_id_5907seq_length_1318	3.33158	1.73621	1.29423	2.57347e-05	5.33254e-05	17.7094
[UP]	scaffold_000044F_transcript_id_15890seq_length_1889	18.8696	4.23799	7.4425	0	0	4170.12
[UP]	scaffold_000000F_transcript_id_27135seq_length_2492	22.4086	4.48598	10.8426	3.09001e-251	7.57544e-250	1146.14
[UP]	scaffold_000082F_transcript_id_3297seq_length_996	2.15339	1.10661	2.20259	7.42516e-05	0.000148104	15.6993
[UP]	scaffold_000052F_transcript_id_18741seq_length_3099	7.24098	2.85619	5.42766	1.25528e-157	2.29266e-156	715.53
[UP]	scaffold_000114F_transcript_id_14134seq_length_859	24.4994	4.61468	9.62997	3.52736e-51	2.85924e-50	226.46
[UP]	scaffold_000000F_transcript_id_27015seq_length_2326	20.7988	4.37843	3.48608	1.58334e-65	1.53838e-64	292.281
[UP]	scaffold_000178F_transcript_id_T1DNZ3.1seq_length_393	3.78332	1.91965	1.4216	1.56278e-06	3.60147e-06	23.0692
[UP]	scaffold_000741F_transcript_id_6624seq_length_2277	14.444	3.8524	6.06581	0	0	1546.44
[UP]	scaffold_000004F_transcript_id_23852seq_length_5971	4.94173	2.30502	3.32165	1.37368e-28	7.43328e-28	123.03
[UP]	scaffold_000960F_transcript_id_5112seq_length_2213	19.8831	4.31347	8.64873	0	0	7552.61
[UP]	scaffold_000033F_transcript_id_21064seq_length_2375	7.2265	2.8533	1.79541	1.28814e-13	4.34012e-13	54.8694
[UP]	scaffold_000203F_transcript_id_9604seq_length_3511	2.32156	1.2151	7.17391	4.51793e-126	7.02346e-125	570.434
[UP]	scaffold_000028F_transcript_id_20132seq_length_2709	32.1296	5.00583	0.886567	6.08057e-12	1.90234e-11	47.3034
[UP]	scaffold_000088F_transcript_id_14849seq_length_3261	5.28911	2.40303	1.77965	6.07847e-11	1.8118e-10	42.7951
[UP]	scaffold_000050F_transcript_id_20190seq_length_2032	25.5485	4.67517	8.32451	0	0	7105.21
[UP]	scaffold_000551F_transcript_id_7029seq_length_2407	11.4341	3.51527	6.24936	0	0	1593.61
[UP]	scaffold_000027F_transcript_id_22228seq_length_4405	2.09828	1.06921	6.50105	3.40936e-65	3.29342e-64	290.752
[UP]	scaffold_000186F_transcript_id_10854seq_length_2277	4.57837	2.19483	4.72703	3.04109e-68	3.04018e-67	304.75
[UP]	scaffold_000006F_transcript_id_25487seq_length_5238	2.17298	1.11968	7.01347	4.76341e-57	4.18971e-56	253.378
[UP]	scaffold_000082F_transcript_id_3299seq_length_1077	2.146	1.10165	2.67273	2.86441e-06	6.4688e-06	21.9053
[UP]	scaffold_000061F_transcript_id_14397seq_length_1224	4.54581	2.18454	7.69328	0	0	2163.84
[UP]	scaffold_000114F_transcript_id_14061seq_length_791	31.3568	4.97071	4.90459	4.64835e-189	9.41595e-188	860.093
[UP]	scaffold_000191F_transcript_id_5713seq_length_2707	19.5737	4.29085	2.56644	2.45568e-34	1.51995e-33	149.308
[UP]	scaffold_000176F_transcript_id_11484seq_length_1904	2.56178	1.35715	2.16667	2.43517e-06	5.5406e-06	22.2169
[UP]	scaffold_000238F_transcript_id_7403seq_length_1767	22.9731	4.52187	7.12984	0	0	3592.44
[UP]	scaffold_000018F_transcript_id_24395seq_length_3307	2.92459	1.54823	2.97919	1.20677e-12	3.91088e-12	50.4753
[UP]	scaffold_000038F_transcript_id_8485seq_length_3304	5.618	2.49006	1.94427	9.60372e-13	3.12144e-12	50.9235
[UP]	scaffold_000018F_transcript_id_24017seq_length_766	2.03986	1.02847	3.90845	1.04882e-11	3.24183e-11	46.2351
[UP]	scaffold_000109F_transcript_id_5495seq_length_2902	2.6713	1.41754	3.54794	8.87432e-16	3.27625e-15	64.6658
[UP]	scaffold_000730F_transcript_id_10415seq_length_2349	30.8949	4.9493	5.92781	0	0	1724.28
[UP]	scaffold_000695F_transcript_id_4729seq_length_3503	2.51009	1.32774	3.76367	2.82899e-16	1.0632e-15	66.919
[UP]	scaffold_000491F_transcript_id_3875seq_length_3877	19.2854	4.26944	9.83006	0	0	7091.32
[UP]	scaffold_000041F_transcript_id_17875seq_length_2959	11.3917	3.50991	7.59155	0	0	3818.87
[UP]	scaffold_000053F_transcript_id_16261seq_length_2552	6.93158	2.79318	6.75463	0	0	1689.66
[UP]	scaffold_000008F_transcript_id_24356seq_length_3112	2.25191	1.17115	6.90092	2.96642e-99	3.90345e-98	447.178
[UP]	scaffold_000040F_transcript_id_19283seq_length_1525	6.55922	2.71352	9.57428	0	0	4755.61
[UP]	scaffold_000405F_transcript_id_13080seq_length_3230	5.84766	2.54786	6.47353	3.11993e-271	8.00091e-270	1238.15
[UP]	scaffold_000159F_transcript_id_2820seq_length_1374	2.23688	1.16149	4.11416	3.20482e-14	1.1127e-13	57.6046
[UP]	scaffold_000482F_transcript_id_3471seq_length_1731	2.34768	1.23124	2.16667	1.59504e-05	3.37629e-05	18.6204
[UP]	scaffold_000210F_transcript_id_12950seq_length_1533	3.02499	1.59693	3.58922	1.32969e-19	5.60201e-19	82.0458
[UP]	scaffold_000033F_transcript_id_21123seq_length_1600	3.94329	1.9794	5.87798	1.61374e-125	2.50092e-124	567.892
[UP]	scaffold_000019F_transcript_id_22618seq_length_836	3.23441	1.6935	6.27224	1.03186e-32	6.15494e-32	141.882
[UP]	scaffold_000354F_transcript_id_13764seq_length_3249	3.5008	1.80768	5.44408	2.17515e-81	2.52141e-80	365.107
[UP]	scaffold_000033F_transcript_id_21809seq_length_893	19.422	4.27962	5.74819	3.88011e-300	1.0898e-298	1371.16
[UP]	scaffold_000175F_transcript_id_4978seq_length_3918	2.76974	1.46975	7.72492	1.84591e-249	4.51438e-248	1137.97
[UP]	scaffold_000301F_transcript_id_8081seq_length_2283	3.07944	1.62267	5.61595	2.66415e-76	2.89419e-75	341.742
[UP]	scaffold_000273F_transcript_id_1896seq_length_1102	17.8812	4.16037	1.38038	7.61348e-15	2.71203e-14	60.4328
[UP]	scaffold_000171F_transcript_id_11408seq_length_1607	15.0586	3.91252	4.01992	7.77308e-86	9.33421e-85	385.532
[UP]	scaffold_000010F_transcript_id_22867seq_length_2838	2.49101	1.31673	5.32292	5.10069e-44	3.72232e-43	193.641
[UP]	scaffold_000047F_transcript_id_19061seq_length_3328	23.4692	4.5527	4.95634	2.50507e-184	5.00365e-183	838.329
[UP]	scaffold_000019F_transcript_id_22557seq_length_1530	31.4141	4.97334	7.21758	0	0	4069.69
[UP]	scaffold_000010F_transcript_id_23242seq_length_3052	9.91774	3.31001	1.02674	1.55721e-09	4.31331e-09	36.4614
[UP]	scaffold_000266F_transcript_id_9149seq_length_1664	22.0902	4.46534	2.28305	3.92042e-29	2.13758e-28	125.518
[UP]	scaffold_000131F_transcript_id_13898seq_length_2090	25.6331	4.67994	6.44494	0	0	2347.65
[UP]	scaffold_000036F_transcript_id_18162seq_length_1492	2.02319	1.01663	2.88656	2.76342e-06	6.24635e-06	21.9742
[UP]	scaffold_000020F_transcript_id_23566seq_length_1664	23.5264	4.55621	5.60686	1.28726e-286	3.48847e-285	1308.94
[UP]	scaffold_000344F_transcript_id_1104seq_length_3408	2.38012	1.25103	9.03216	4.7011e-46	3.54421e-45	202.968
[UP]	scaffold_000532F_transcript_id_5927seq_length_900	2.01685	1.0121	4.3162	1.16697e-14	4.11725e-14	59.5922
[UP]	scaffold_000488F_transcript_id_5905seq_length_2177	25.9757	4.69909	7.23286	0	0	3952.65
[UP]	scaffold_000189F_transcript_id_4911seq_length_2382	28.8975	4.85287	8.72096	0	0	6941.87
[UP]	scaffold_000041F_transcript_id_18054seq_length_3491	17.0817	4.09438	3.51017	4.52874e-63	4.26382e-62	281.008
[UP]	scaffold_000326F_transcript_id_5160seq_length_600	5.74826	2.52312	0.698129	8.89095e-06	1.92631e-05	19.736
[UP]	scaffold_000006F_transcript_id_25366seq_length_1795	2.54677	1.34867	1.6469	0.000112031	0.000219961	14.9223
[UP]	scaffold_000018F_transcript_id_24327seq_length_2098	2.15319	1.10648	4.84162	8.23726e-24	3.92935e-23	101.219
[UP]	scaffold_000023F_transcript_id_21234seq_length_2456	28.3687	4.82623	7.79076	0	0	5755.96
[UP]	scaffold_000079F_transcript_id_14902seq_length_2783	7.06314	2.82031	1.12984	1.19531e-08	3.13917e-08	32.4945
[UP]	scaffold_000194F_transcript_id_6377seq_length_3130	11.9185	3.57514	2.85677	1.34712e-35	8.52214e-35	155.077
[UP]	scaffold_000052F_transcript_id_18438seq_length_2313	7.47087	2.90128	1.95834	1.78867e-15	6.50761e-15	63.2849
[UP]	scaffold_000174F_transcript_id_6996seq_length_2037	2.89143	1.53179	4.75958	2.30872e-39	1.55889e-38	172.316
[UP]	scaffold_000001F_transcript_id_25200seq_length_1736	9.66437	3.27268	7.4404	0	0	3206.83
[UP]	scaffold_000017F_transcript_id_22893seq_length_2098	8.85373	3.14629	5.17548	8.88517e-150	1.57684e-148	679.431
[UP]	scaffold_000744F_transcript_id_6478seq_length_1698	3.32852	1.73488	7.1039	3.69417e-165	6.89786e-164	750.165
[UP]	scaffold_000037F_transcript_id_19411seq_length_2118	22.3808	4.48419	7.28576	0	0	3948.55
[UP]	scaffold_000123F_transcript_id_13330seq_length_2136	2.25771	1.17486	1.02675	0.00735754	0.0117643	7.18354
[UP]	scaffold_000002F_transcript_id_24713seq_length_2425	2.12695	1.08879	0.886577	0.0182154	0.027224	5.57531
[UP]	scaffold_000085F_transcript_id_12816seq_length_1179	2.3227	1.2158	8.26806	1.54754e-74	1.63856e-73	333.642
[UP]	scaffold_000755F_transcript_id_8915seq_length_2250	2.09205	1.06492	8.20937	2.10304e-44	1.54712e-43	195.404
[UP]	scaffold_000061F_transcript_id_14409seq_length_1290	8.66686	3.11551	3.71884	3.7944e-55	3.2574e-54	244.658
[UP]	scaffold_000752F_transcript_id_43seq_length_2735	17.8234	4.1557	7.24118	0	0	3601.98
[UP]	scaffold_000019F_transcript_id_23124seq_length_2637	27.267	4.76908	8.65168	0	0	8164.78
[UP]	scaffold_000076F_transcript_id_9740seq_length_2359	12.8479	3.68346	2.20257	1.83479e-23	8.64947e-23	99.6324
[UP]	scaffold_000068F_transcript_id_17826seq_length_3297	2.04171	1.02978	5.28299	3.29407e-10	9.43704e-10	39.492
[UP]	scaffold_000219F_transcript_id_12085seq_length_2527	5.73772	2.52048	3.2886	1.30756e-31	7.59172e-31	136.839
[UP]	scaffold_000194F_transcript_id_6272seq_length_5012	2.37024	1.24504	2.09203	2.22235e-05	4.62313e-05	17.9886
[UP]	scaffold_000188F_transcript_id_6096seq_length_2101	25.4186	4.66781	7.08046	0	0	3562.71
[UP]	scaffold_000043F_transcript_id_17048seq_length_1244	2.07441	1.0527	7.32852	9.91723e-87	1.19952e-85	389.639
[UP]	scaffold_000273F_transcript_id_1897seq_length_2192	27.73	4.79338	8.34989	0	0	6974.81
[UP]	scaffold_000116F_transcript_id_18824seq_length_1157	4.03607	2.01295	2.45175	2.50917e-13	8.3503e-13	53.5592
[UP]	scaffold_000029F_transcript_id_21002seq_length_3243	2.30597	1.20537	7.68851	4.55695e-43	3.26843e-42	189.284
[UP]	scaffold_000043F_transcript_id_17585seq_length_1362	22.5507	4.4951	0.481316	2.07908e-08	5.37846e-08	31.4193
[UP]	scaffold_000012F_transcript_id_22615seq_length_2224	26.8091	4.74465	9.41463	0	0	9741.19
[UP]	scaffold_000311F_transcript_id_11574seq_length_849	23.7012	4.56689	6.40185	0	0	2240.41
[UP]	scaffold_000005F_transcript_id_23262seq_length_1184	2.29008	1.1954	8.09957	4.24527e-205	8.98045e-204	933.875
[UP]	scaffold_000027F_transcript_id_22112seq_length_3490	5.31681	2.41056	7.31802	1.33212e-262	3.38155e-261	1198.44
[UP]	scaffold_000123F_transcript_id_13348seq_length_2433	2.09638	1.0679	1.2026	0.00857024	0.0135521	6.91026
[UP]	scaffold_000252F_transcript_id_11807seq_length_1539	2.13187	1.09212	5.87718	2.36954e-45	1.77045e-44	199.749
[UP]	scaffold_000000F_transcript_id_26613seq_length_2576	2.6217	1.3905	6.44214	1.75022e-100	2.3306e-99	452.826
[UP]	scaffold_000169F_transcript_id_4852seq_length_2255	2.21204	1.14538	1.24915	0.00427418	0.00703616	8.1635
[UP]	scaffold_000491F_transcript_id_3878seq_length_1207	22.2821	4.47781	1.17874	1.23021e-13	4.14632e-13	54.9598
[UP]	scaffold_000019F_transcript_id_23131seq_length_2253	22.1241	4.46755	1.99975	5.50522e-24	2.6374e-23	102.017
[UP]	scaffold_000388F_transcript_id_3607seq_length_1263	3.22817	1.69072	2.74757	1.74413e-12	5.59988e-12	49.7525
[UP]	scaffold_000033F_transcript_id_21099seq_length_2223	27.9613	4.80536	13.7065	0	0	18263.5
[UP]	scaffold_000250F_transcript_id_10209seq_length_4364	29.1662	4.86623	2.35929	1.4519e-32	8.61945e-32	141.204
[UP]	scaffold_000023F_transcript_id_22644seq_length_501	2.09638	1.0679	1.2026	0.00857025	0.0135521	6.91026
[UP]	scaffold_000062F_transcript_id_19426seq_length_1600	2.48949	1.31585	4.71678	1.31624e-29	7.27158e-29	127.684
[UP]	scaffold_000116F_transcript_id_18405seq_length_1124	7.64849	2.93517	0.999779	2.75441e-08	7.09623e-08	30.8733
[UP]	scaffold_000125F_transcript_id_12380seq_length_3786	3.06166	1.61431	0.481321	0.00441196	0.00725106	8.10597
[UP]	scaffold_000038F_transcript_id_7694seq_length_1961	22.0975	4.46581	7.03847	0	0	3352.24
[UP]	scaffold_000063F_transcript_id_16634seq_length_2388	30.5331	4.9323	0.826447	2.36719e-11	7.1666e-11	44.6407
[UP]	scaffold_000044F_transcript_id_15847seq_length_1981	17.7392	4.14887	7.10716	0	0	3297.63
[UP]	scaffold_000551F_transcript_id_7005seq_length_2199	16.9358	4.08201	6.48012	0	0	2152.28
[UP]	scaffold_000000F_transcript_id_26935seq_length_2048	20.3202	4.34485	5.06761	9.0029e-192	1.83854e-190	872.572
[UP]	scaffold_000495F_transcript_id_3847seq_length_1735	13.7292	3.77918	1.68124	7.79603e-17	3.0008e-16	69.4605
[UP]	scaffold_000088F_transcript_id_13006seq_length_2249	2.89104	1.53159	8.03433	1.0E-323	2.9E-322	1479.75
[UP]	scaffold_000115F_transcript_id_765seq_length_2401	28.573	4.83658	9.24872	3.17813e-62	2.95066e-61	277.125
[UP]	scaffold_000259F_transcript_id_14402seq_length_2169	2.04305	1.03072	5.05312	4.3483e-24	2.09014e-23	102.484
[UP]	scaffold_000033F_transcript_id_21534seq_length_1714	22.9155	4.51825	9.1927	0	0	8779.73
[UP]	scaffold_000090F_transcript_id_19002seq_length_2159	2.02411	1.01729	7.0501	1.46857e-21	6.55042e-21	90.9566
[UP]	scaffold_000142F_transcript_id_6170seq_length_3018	2.13399	1.09356	4.2318	7.59873e-16	2.81465e-15	64.9715
[UP]	scaffold_000068F_transcript_id_17615seq_length_5402	17.0901	4.09509	7.33208	0	0	3770.01
[UP]	scaffold_000001F_transcript_id_25063seq_length_679	3.64195	1.86471	6.93364	2.69142e-227	6.16139e-226	1036
[UP]	scaffold_000085F_transcript_id_13868seq_length_761	2.46185	1.29974	5.33914	1.70394e-43	1.23005e-42	191.241
[UP]	scaffold_000243F_transcript_id_6562seq_length_1264	2.76278	1.46612	3.29973	3.19251e-14	1.10881e-13	57.6121
[UP]	scaffold_000299F_transcript_id_7892seq_length_1781	5.69246	2.50905	0.44179	7.07287e-05	0.000141331	15.7913
[UP]	scaffold_000236F_transcript_id_3024seq_length_1243	2.72535	1.44644	1.88657	6.84286e-06	1.49452e-05	20.2367
[UP]	scaffold_000344F_transcript_id_C4WYE6.1seq_length_645	10.2738	3.3609	3.08558	4.99648e-39	3.35789e-38	170.781
[UP]	scaffold_000047F_transcript_id_19261seq_length_1549	2.25293	1.1718	5.54783	1.5318e-41	1.07483e-40	182.291
[UP]	scaffold_000081F_transcript_id_16071seq_length_1437	2.47755	1.30891	5.29824	7.2065e-43	5.15404e-42	188.372
[UP]	scaffold_000002F_transcript_id_24829seq_length_1697	3.49094	1.80362	5.31743	1.49793e-74	1.58771e-73	333.707
[UP]	scaffold_000000F_transcript_id_27004seq_length_1454	19.354	4.27456	7.01931	0	0	3195.06
[UP]	scaffold_000874F_transcript_id_20seq_length_3234	2.08703	1.06145	3.66413	0.00167566	0.00289089	9.87471
[UP]	scaffold_000105F_transcript_id_17171seq_length_3931	2.31938	1.21374	7.5818	2.14387e-129	3.41757e-128	585.714
[UP]	scaffold_000000F_transcript_id_27037seq_length_543	2.20603	1.14146	6.13118	1.49154e-17	5.8535e-17	72.7234
[UP]	scaffold_000020F_transcript_id_23248seq_length_2544	2.16049	1.11136	5.38808	1.37543e-21	6.14317e-21	91.0863
[UP]	scaffold_000348F_transcript_id_13740seq_length_3777	2.2633	1.17843	7.36888	1.01415e-134	1.67251e-133	610.196
[UP]	scaffold_000087F_transcript_id_9772seq_length_3036	11.6933	3.54761	11.3169	0	0	6120.81
[UP]	scaffold_000066F_transcript_id_18070seq_length_1721	2.26262	1.178	6.40541	4.63489e-73	4.84609e-72	326.863
[UP]	scaffold_000058F_transcript_id_15920seq_length_1322	2.83248	1.50207	5.72903	4.09025e-72	4.2325e-71	322.521
[UP]	scaffold_000047F_transcript_id_19938seq_length_3809	2.07465	1.05287	7.18633	8.23513e-98	1.06684e-96	440.546
[UP]	scaffold_000119F_transcript_id_15686seq_length_4386	5.45057	2.44641	2.16666	2.03281e-14	7.09713e-14	58.5001
[UP]	scaffold_000063F_transcript_id_16668seq_length_3538	3.03638	1.60235	7.4319	9.68459e-242	2.32314e-240	1102.45
[UP]	scaffold_000005F_transcript_id_23832seq_length_7873	29.2032	4.86805	4.40095	2.84744e-132	4.61995e-131	598.94
[UP]	scaffold_000167F_transcript_id_16983seq_length_1645	20.9542	4.38917	0.401147	8.0267e-08	2.01461e-07	28.7996
[UP]	scaffold_000186F_transcript_id_10251seq_length_2180	19.3577	4.27484	0.316259	3.09228e-07	7.49669e-07	26.1912
[UP]	scaffold_000000F_transcript_id_26353seq_length_2400	27.3195	4.77186	7.8563	0	0	5951
[UP]	scaffold_000566F_transcript_id_33seq_length_680	33.3576	5.05994	9.40541	2.60635e-51	2.11954e-50	227.062
[UP]	scaffold_000030F_transcript_id_21969seq_length_1431	12.8561	3.68438	6.80698	0	0	2421.98
[UP]	scaffold_000381F_transcript_id_5555seq_length_1050	2.1509	1.10494	3.20848	1.32029e-08	3.45835e-08	32.3012
[UP]	scaffold_000037F_transcript_id_18329seq_length_1612	2.19725	1.1357	5.38808	1.93255e-35	1.22102e-34	154.36
[UP]	scaffold_000023F_transcript_id_21287seq_length_2111	2.28218	1.19042	6.07499	3.86396e-60	3.49359e-59	267.558
[UP]	scaffold_000043F_transcript_id_17585seq_length_1362	16.7645	4.06733	2.84166	1.09139e-39	7.42927e-39	173.806
[UP]	scaffold_000002F_transcript_id_24642seq_length_4090	3.23069	1.69184	2.21436	5.99248e-09	1.60445e-08	33.8371
[UP]	scaffold_000001F_transcript_id_25538seq_length_3952	2.82999	1.5008	8.00669	1.37082e-214	2.98809e-213	977.537
[UP]	scaffold_000655F_transcript_id_6985seq_length_1306	3.39948	1.76531	4.41131	2.56932e-24	1.24457e-23	103.527
[UP]	scaffold_000002F_transcript_id_24675seq_length_2332	17.8288	4.15614	4.58226	7.04346e-133	1.154e-131	601.729
[UP]	scaffold_000033F_transcript_id_21036seq_length_2049	5.14773	2.36394	0.795426	1.03211e-05	2.21987e-05	19.451
[UP]	scaffold_000692F_transcript_id_1779seq_length_3335	7.20574	2.84915	-0.0276916	0.000439466	0.000810024	12.3564
[UP]	scaffold_000448F_transcript_id_7421seq_length_2104	38.1413	5.25328	2.34864	7.82018e-34	4.7842e-33	147.007
[UP]	scaffold_000079F_transcript_id_15250seq_length_2244	16.9592	4.084	2.55722	8.86822e-33	5.29611e-32	142.183
[UP]	scaffold_000059F_transcript_id_15524seq_length_2802	8.53693	3.09372	6.18654	4.15973e-289	1.13341e-287	1320.4
[UP]	scaffold_000115F_transcript_id_751seq_length_2407	2.58736	1.37148	7.27218	1.25998e-166	2.36589e-165	756.913
[UP]	scaffold_000216F_transcript_id_6792seq_length_1937	30.7197	4.94109	8.36728	0	0	7796.24
[UP]	scaffold_000041F_transcript_id_18054seq_length_3491	10.7531	3.42668	0.359328	2.90789e-06	6.55812e-06	21.8764
[UP]	scaffold_000033F_transcript_id_21563seq_length_3246	15.5034	3.95452	8.15712	0	0	6140
[UP]	scaffold_000268F_transcript_id_14601seq_length_2390	2.01228	1.00883	7.96521	2.02868e-107	2.82131e-106	484.699
[UP]	scaffold_000087F_transcript_id_10085seq_length_2582	29.2017	4.86798	10.9769	0	0	5788.56
[UP]	scaffold_000156F_transcript_id_9376seq_length_2183	25.0782	4.64836	6.52686	0	0	2467.01
[UP]	scaffold_000915F_transcript_id_8177seq_length_2065	2.1388	1.0968	3.89752	6.29504e-13	2.05805e-12	51.7527
[UP]	scaffold_000256F_transcript_id_4014seq_length_2300	21.6976	4.43946	8.86217	0	0	8268.9
[UP]	scaffold_000269F_transcript_id_1866seq_length_1387	2.93238	1.55207	0.593796	0.00390651	0.00645741	8.32677
[UP]	scaffold_000134F_transcript_id_D3TLT8.1seq_length_771	2.45212	1.29403	7.09687	1.65303e-134	2.72166e-133	609.221
[UP]	scaffold_000034F_transcript_id_20633seq_length_2668	24.9731	4.6423	10.1815	4.64716e-116	6.85252e-115	524.41
[UP]	scaffold_000091F_transcript_id_18577seq_length_2265	2.24259	1.16516	2.04004	0.000162893	0.000314767	14.217
[UP]	scaffold_000370F_transcript_id_8035seq_length_2095	2.04671	1.03331	4.72506	1.23035e-19	5.18568e-19	82.1993
[UP]	scaffold_000005F_transcript_id_23374seq_length_3138	9.06736	3.18068	8.4082	0	0	2577.03
[UP]	scaffold_000216F_transcript_id_7305seq_length_4846	3.69564	1.88582	8.87091	0	0	1674.74
[UP]	scaffold_000059F_transcript_id_14744seq_length_1485	2.9394	1.55552	5.69581	6.87542e-75	7.31069e-74	335.259
[UP]	scaffold_000318F_transcript_id_3718seq_length_1502	2.88066	1.5264	1.82644	3.98637e-06	8.87857e-06	21.2714
[UP]	scaffold_000004F_transcript_id_23434seq_length_2309	20.289	4.34262	4.75746	3.08248e-155	5.59928e-154	704.538
[UP]	scaffold_000038F_transcript_id_8729seq_length_1525	8.00109	3.0002	2.15448	2.45059e-18	9.90807e-18	76.2889
[UP]	scaffold_000071F_transcript_id_8418seq_length_1623	40.1121	5.32596	1.1545	6.71749e-15	2.39873e-14	60.6792
[UP]	scaffold_000123F_transcript_id_13091seq_length_3083	8.18226	3.0325	-0.480201	0.00350622	0.0058226	8.52333
[UP]	scaffold_000174F_transcript_id_6712seq_length_2473	2.93238	1.55207	0.593796	0.00390651	0.00645741	8.32677
[UP]	scaffold_000178F_transcript_id_9776seq_length_2241	2.78491	1.47763	5.15588	4.31557e-48	3.37274e-47	212.305
[UP]	scaffold_000359F_transcript_id_4491seq_length_3972	5.5881	2.48236	7.87567	0	0	2934.62
[UP]	scaffold_000002F_transcript_id_24850seq_length_3933	2.12613	1.08823	3.17873	2.94858e-08	7.58088e-08	30.7411
[UP]	scaffold_000035F_transcript_id_20102seq_length_3711	8.97828	3.16644	2.50064	1.33808e-24	6.53528e-24	104.819
[UP]	scaffold_000100F_transcript_id_15632seq_length_1569	7.64849	2.93517	0.99978	2.75442e-08	7.09623e-08	30.8733
[UP]	scaffold_000099F_transcript_id_14503seq_length_537	2.17121	1.1185	1.50068	0.00207516	0.0035345	9.48184
[UP]	scaffold_000126F_transcript_id_15317seq_length_3170	3.52061	1.81582	7.06704	5.38009e-237	1.27834e-235	1080.62
[UP]	scaffold_000092F_transcript_id_13244seq_length_2691	20.2207	4.33776	10.4399	0	0	6019.5
[UP]	scaffold_000031F_transcript_id_20599seq_length_4489	2.90316	1.53762	5.01487	7.15559e-47	5.46868e-46	206.715
[UP]	scaffold_000053F_transcript_id_15820seq_length_4341	5.02573	2.32933	5.40089	4.89603e-117	7.26221e-116	528.902
[UP]	scaffold_000502F_transcript_id_7293seq_length_2213	5.61445	2.48915	2.97225	3.71321e-25	1.84319e-24	107.359
[UP]	scaffold_000001F_transcript_id_25445seq_length_2762	19.6516	4.29657	6.98796	0	0	3143.76
[UP]	scaffold_000027F_transcript_id_21224seq_length_1536	2.8408	1.5063	2.89389	1.72047e-11	5.25056e-11	45.2656
[UP]	scaffold_000087F_transcript_id_10046seq_length_2403	33.2705	5.05617	9.25691	0	0	8753.37
[UP]	scaffold_000005F_transcript_id_23342seq_length_2708	18.0818	4.17646	7.41505	0	0	4046.02
[UP]	scaffold_000000F_transcript_id_26484seq_length_1114	23.6727	4.56515	9.39966	0	0	2835.17
[UP]	scaffold_000080F_transcript_id_C4WV72.1seq_length_651	2.32489	1.21717	4.93532	7.71791e-30	4.29931e-29	128.743
[UP]	scaffold_000233F_transcript_id_14194seq_length_1739	12.7914	3.6771	2.62055	3.80075e-31	2.18396e-30	134.721
[UP]	scaffold_000022F_transcript_id_21343seq_length_3515	6.8884	2.78417	0.886571	2.87192e-07	6.97765e-07	26.334
[UP]	scaffold_000006F_transcript_id_25490seq_length_1831	6.25324	2.6446	1.6294	3.69241e-11	1.10883e-10	43.7704
[UP]	scaffold_000026F_transcript_id_18472seq_length_5328	3.33017	1.7356	5.55357	6.9531e-82	8.10683e-81	367.382
[UP]	scaffold_000555F_transcript_id_10549seq_length_864	11.6526	3.54258	7.72298	0	0	4190.9
[UP]	scaffold_000019F_transcript_id_22549seq_length_877	37.1683	5.216	7.23537	0	0	4241.5
[UP]	scaffold_001089F_transcript_id_3231seq_length_2095	2.78047	1.47533	2.4114	2.82715e-08	7.27614e-08	30.8227
[UP]	scaffold_000081F_transcript_id_16383seq_length_3348	25.1345	4.6516	3.38029	9.86987e-64	9.36284e-63	284.044
[UP]	scaffold_000299F_transcript_id_7892seq_length_1781	5.45735	2.4482	2.45174	2.04566e-17	8.00931e-17	72.1
[UP]	scaffold_000195F_transcript_id_6082seq_length_2176	7.26844	2.86165	0.944286	8.93757e-08	2.24099e-07	28.5915
[UP]	scaffold_000264F_transcript_id_1498seq_length_4799	2.08486	1.05995	7.71342	3.97847e-137	6.65979e-136	621.26
[UP]	scaffold_000000F_transcript_id_26319seq_length_2641	2.7282	1.44795	6.38271	8.89535e-104	1.20369e-102	467.962
[UP]	scaffold_000176F_transcript_id_11145seq_length_1638	27.2227	4.76674	8.76	0	0	8223.75
[UP]	scaffold_000089F_transcript_id_15687seq_length_2148	3.08001	1.62294	8.69695	0	0	2103.45
[UP]	scaffold_000046F_transcript_id_20594seq_length_1896	3.00002	1.58497	8.40777	0	0	1809.76
[UP]	scaffold_000574F_transcript_id_6989seq_length_2963	4.27395	2.09557	5.2331	2.64154e-89	3.26191e-88	401.466
[UP]	scaffold_000036F_transcript_id_17587seq_length_980	2.2684	1.18168	6.12106	3.77029e-61	3.4588e-60	272.196
[UP]	scaffold_000009F_transcript_id_26571seq_length_3141	5.19796	2.37795	1.85681	2.36292e-11	7.15585e-11	44.6442
[UP]	scaffold_000005F_transcript_id_23354seq_length_2580	2.21204	1.14538	1.24915	0.00427418	0.00703616	8.1635
[UP]	scaffold_000056F_transcript_id_11650seq_length_1469	2.43953	1.2866	6.92573	1.93966e-119	2.93348e-118	539.943
[UP]	scaffold_000015F_transcript_id_22655seq_length_2447	6.27193	2.64891	8.32408	0	0	3299.52
[UP]	scaffold_000055F_transcript_id_13288seq_length_3957	12.9952	3.69991	8.88462	0	0	5870.51
[UP]	scaffold_000202F_transcript_id_2797seq_length_3819	2.06164	1.04379	3.3593	1.31076e-08	3.43608e-08	32.3153
[UP]	scaffold_000079F_transcript_id_14854seq_length_2094	9.28598	3.21505	0.629414	4.29242e-07	1.02893e-06	25.5582
[UP]	scaffold_000653F_transcript_id_6596seq_length_2268	2.30201	1.20289	5.22883	2.30958e-35	1.45466e-34	154.005
[UP]	scaffold_000665F_transcript_id_241seq_length_1384	2.94806	1.55976	4.22307	3.10277e-18	1.25046e-17	75.8229
[UP]	scaffold_000230F_transcript_id_8424seq_length_3951	2.66757	1.41552	4.89928	1.02607e-35	6.50751e-35	155.618
[UP]	scaffold_000073F_transcript_id_17152seq_length_3587	2.69053	1.42789	0.519797	0.00934826	0.0146782	6.75505
[UP]	scaffold_000109F_transcript_id_5767seq_length_5298	2.10271	1.07225	7.22903	7.00622e-104	9.49342e-103	468.439
[UP]	scaffold_000045F_transcript_id_19051seq_length_1831	8.79785	3.13715	8.52796	0	0	5320.93
[UP]	scaffold_000434F_transcript_id_1155seq_length_2287	17.8812	4.16037	1.38037	7.61345e-15	2.71203e-14	60.4328
[UP]	scaffold_000268F_transcript_id_14962seq_length_577	2.22534	1.15402	5.44165	9.6208e-38	6.30508e-37	164.9
[UP]	scaffold_000172F_transcript_id_8158seq_length_3552	4.21956	2.07709	8.47706	2.58162e-150	4.5897e-149	681.899
[UP]	scaffold_000031F_transcript_id_19801seq_length_4595	2.42973	1.28079	7.71518	1.91804e-22	8.83426e-22	94.9853
[UP]	scaffold_000049F_transcript_id_13751seq_length_2359	4.50926	2.17289	0.664182	8.78824e-05	0.000174356	15.3807
[UP]	scaffold_000041F_transcript_id_17954seq_length_2328	6.1283	2.61549	0.763715	2.86799e-06	6.47542e-06	21.9029
[UP]	scaffold_000047F_transcript_id_19389seq_length_2079	25.8675	4.69307	8.06382	0	0	6354.41
[UP]	scaffold_000174F_transcript_id_6748seq_length_2149	2.45069	1.29319	2.56647	1.79266e-07	4.40347e-07	27.2447
[UP]	scaffold_000214F_transcript_id_9243seq_length_1399	3.87078	1.95263	0.519794	0.000691132	0.00124663	11.5129
[UP]	scaffold_000177F_transcript_id_740seq_length_1161	4.18856	2.06645	8.01096	0	0	2413.16
[UP]	scaffold_000087F_transcript_id_9367seq_length_1170	2.10102	1.07109	5.04984	1.03682e-25	5.22685e-25	109.888
[UP]	scaffold_001030F_transcript_id_6097seq_length_841	2.07818	1.05532	4.93888	2.45703e-23	1.15448e-22	99.0541
[UP]	scaffold_000078F_transcript_id_18399seq_length_3311	4.33378	2.11563	1.74759	4.31196e-09	1.16414e-08	34.4776
[UP]	scaffold_000009F_transcript_id_26616seq_length_1735	4.60812	2.20418	0.48132	0.000240445	0.000456532	13.4853
[UP]	scaffold_000755F_transcript_id_8846seq_length_3566	3.17422	1.6664	0.664184	0.00158091	0.00273401	9.98185
[UP]	scaffold_000041F_transcript_id_17954seq_length_2328	3.98953	1.99622	7.63294	0	0	1619.07
[UP]	scaffold_000035F_transcript_id_20089seq_length_2907	8.54268	3.09469	5.92162	1.90204e-242	4.58455e-241	1105.7
[UP]	scaffold_000093F_transcript_id_17856seq_length_2440	3.71399	1.89297	4.4164	3.24647e-44	2.37956e-43	194.54
[UP]	scaffold_000102F_transcript_id_15256seq_length_3277	5.2496	2.39221	1.95835	3.19334e-12	1.01296e-11	48.5661
[UP]	scaffold_000015F_transcript_id_23773seq_length_3216	6.51186	2.70307	7.82399	0	0	3064.31
[UP]	scaffold_000086F_transcript_id_14607seq_length_2015	3.29333	1.71955	4.75151	2.22751e-47	1.7181e-46	209.038
[UP]	scaffold_000322F_transcript_id_10436seq_length_801	2.10057	1.07078	3.47151	1.38347e-09	3.84267e-09	36.692
[UP]	scaffold_000037F_transcript_id_18684seq_length_1884	4.51541	2.17486	7.79352	1.05076e-38	7.00993e-38	169.303
[UP]	scaffold_000126F_transcript_id_15317seq_length_3170	2.17991	1.12427	1.44179	0.00248531	0.00420027	9.15138
[UP]	scaffold_000262F_transcript_id_10333seq_length_1002	7.30949	2.86977	6.37992	3.2393e-299	9.07275e-298	1366.92
[UP]	scaffold_000168F_transcript_id_11660seq_length_1546	4.45267	2.15467	4.4714	6.19498e-56	5.3688e-55	248.268
[UP]	scaffold_000265F_transcript_id_14289seq_length_3156	8.84089	3.14419	1.57563	4.32836e-13	1.42437e-12	52.4882
[UP]	scaffold_000128F_transcript_id_15575seq_length_1652	2.25386	1.1724	3.64252	7.57596e-09	2.01818e-08	33.381
[UP]	scaffold_000316F_transcript_id_3846seq_length_2821	2.61535	1.38701	0.629421	0.00800285	0.0127352	7.03284
[UP]	scaffold_000171F_transcript_id_12148seq_length_2607	2.19126	1.13176	1.93007	0.000253351	0.000479945	13.3872
[UP]	scaffold_000079F_transcript_id_14927seq_length_2157	16.3895	4.0347	1.9012	1.05193e-20	4.58197e-20	87.0616
[UP]	scaffold_000043F_transcript_id_17918seq_length_1412	2.70463	1.43543	4.31618	2.03603e-26	1.04266e-25	113.115
[UP]	scaffold_000041F_transcript_id_18241seq_length_2309	10.9956	3.45885	9.12489	1.49302e-122	2.2821e-121	554.256
[UP]	scaffold_000031F_transcript_id_18891seq_length_640	7.06983	2.82168	2.4715	4.1566e-21	1.82799e-20	88.8982
[UP]	scaffold_000915F_transcript_id_8234seq_length_8529	2.27753	1.18747	0.944293	0.00881683	0.0139223	6.85956
[UP]	scaffold_000191F_transcript_id_5713seq_length_2707	3.61206	1.85282	0.629419	0.000664179	0.00119952	11.5869
[UP]	scaffold_000400F_transcript_id_1063seq_length_1848	11.5843	3.53409	2.61167	8.84089e-30	4.91745e-29	128.474
[UP]	scaffold_000238F_transcript_id_7371seq_length_1463	3.61489	1.85395	2.11734	1.3643e-09	3.79152e-09	36.7192
[UP]	scaffold_000000F_transcript_id_26470seq_length_2414	2.37256	1.24644	6.72742	1.97399e-99	2.60095e-98	447.991
[UP]	scaffold_000182F_transcript_id_3554seq_length_2826	9.28329	3.21464	8.6362	0	0	4184.4
[UP]	scaffold_000041F_transcript_id_18839seq_length_2131	11.6134	3.53772	2.72303	3.70109e-32	2.17404e-31	139.346
[UP]	scaffold_000392F_transcript_id_2622seq_length_3357	4.91437	2.29701	6.92732	9.6354706473E-314	2.808571633167E-312	1433.77
[UP]	scaffold_000578F_transcript_id_4349seq_length_1617	18.408	4.20226	8.5403	0	0	6701.14
[UP]	scaffold_000689F_transcript_id_4114seq_length_887	2.47444	1.3071	6.87238	9.33783e-119	1.40586e-117	536.806
[UP]	scaffold_000028F_transcript_id_D3TPM3.1seq_length_627	3.24123	1.69654	8.01044	5.25699e-242	1.26407e-240	1103.67
[UP]	scaffold_000044F_transcript_id_15869seq_length_2928	3.98588	1.9949	8.55014	0	0	2451.94
[UP]	scaffold_000154F_transcript_id_13008seq_length_1128	6.70249	2.7447	6.89288	0	0	1806.81
[UP]	scaffold_000359F_transcript_id_4537seq_length_1586	19.747	4.30356	5.61799	3.38103e-276	8.82853e-275	1261
[UP]	scaffold_000055F_transcript_id_13659seq_length_1335	2.58323	1.36917	5.8377	5.55446e-66	5.44424e-65	294.369
[UP]	scaffold_000056F_transcript_id_11553seq_length_2628	3.25197	1.70132	2.88654	9.10887e-14	3.0919e-13	55.5505
[UP]	scaffold_000022F_transcript_id_21507seq_length_2666	2.38952	1.25672	3.31075	3.23948e-11	9.74859e-11	44.0266
[UP]	scaffold_000004F_transcript_id_24480seq_length_1679	8.57343	3.09987	2.70645	1.31713e-27	6.96563e-27	118.545
[UP]	scaffold_000030F_transcript_id_22520seq_length_2639	4.82365	2.27012	8.85031	0	0	3775.87
[UP]	scaffold_000202F_transcript_id_2797seq_length_3819	2.11885	1.08328	4.25194	8.55979e-16	3.16362e-15	64.7369
[UP]	scaffold_000095F_transcript_id_15161seq_length_1597	26.6525	4.7362	8.65033	0	0	7804.97
[UP]	scaffold_000038F_transcript_id_7656seq_length_1624	17.5162	4.13062	6.00356	0	0	1580.94
[UP]	scaffold_000048F_transcript_id_16534seq_length_482	2.23824	1.16236	3.48615	4.98939e-11	1.49295e-10	43.1814
[UP]	scaffold_000495F_transcript_id_3844seq_length_1654	35.1739	5.13643	8.08377	0	0	7209.09
[UP]	scaffold_000052F_transcript_id_17023seq_length_2045	21.612	4.43376	7.76526	0	0	5160.94
[UP]	scaffold_000027F_transcript_id_21993seq_length_6025	2.81138	1.49128	1.61171	3.06612e-05	6.31552e-05	17.3764
[UP]	scaffold_000122F_transcript_id_15327seq_length_1774	15.3036	3.9358	7.15146	0	0	3234.95
[UP]	scaffold_000765F_transcript_id_10243seq_length_3233	9.56039	3.25707	4.55708	1.51802e-102	2.03765e-101	462.3
[UP]	scaffold_000268F_transcript_id_14934seq_length_1412	3.12651	1.64455	6.99511	9.61978e-192	1.96052e-190	872.44
[UP]	scaffold_000100F_transcript_id_15509seq_length_2251	2.36713	1.24314	5.68216	1.64106e-08	4.27512e-08	31.8787
[UP]	scaffold_000005F_transcript_id_23956seq_length_1531	2.19727	1.13571	2.29422	2.70115e-05	5.58672e-05	17.6173
[UP]	scaffold_000105F_transcript_id_16595seq_length_919	5.01529	2.32633	8.80249	0	0	3072.71
[UP]	scaffold_000021F_transcript_id_18924seq_length_1623	2.43648	1.2848	6.05627	4.80149e-68	4.79528e-67	303.839
[UP]	scaffold_000105F_transcript_id_16802seq_length_3466	2.12874	1.09	5.62927	1.64806e-38	1.09728e-37	168.408
[UP]	scaffold_000033F_transcript_id_D3TN06.1seq_length_372	20.4414	4.35342	7.78192	0	0	5291.78
[UP]	scaffold_000031F_transcript_id_19460seq_length_2501	4.07146	2.02555	9.16252	0	0	2756.54
[UP]	scaffold_000043F_transcript_id_16552seq_length_2754	17.6473	4.14138	2.43169	1.98606e-30	1.11689e-29	131.438
[UP]	scaffold_000079F_transcript_id_14854seq_length_2094	120.854	6.91712	0.519789	1.18246e-10	3.45572e-10	41.4938
[UP]	scaffold_000088F_transcript_id_14903seq_length_1341	18.6778	4.22325	3.62931	3.15272e-70	3.19962e-69	313.859
[UP]	scaffold_000176F_transcript_id_12015seq_length_2469	32.2914	5.01308	12.7874	0	0	5644.22
[UP]	scaffold_000116F_transcript_id_18818seq_length_1848	18.3416	4.19705	4.2288	2.86728e-105	3.93838e-104	474.817
[UP]	scaffold_000006F_transcript_id_26119seq_length_1542	25.2085	4.65584	8.78216	0	0	8513.8
[UP]	scaffold_000215F_transcript_id_7678seq_length_2942	5.42118	2.43861	3.7756	6.61257e-42	4.66275e-41	183.962
[UP]	scaffold_000000F_transcript_id_27002seq_length_2351	15.0554	3.91221	5.81448	5.06713e-290	1.39583e-288	1324.61
[UP]	scaffold_000050F_transcript_id_20034seq_length_2440	2.14334	1.09986	9.4524	6.98057e-66	6.82204e-65	293.913
[UP]	scaffold_000238F_transcript_id_7464seq_length_1313	3.19912	1.67767	2.59377	3.36287e-11	1.01108e-10	43.9534
[UP]	scaffold_000180F_transcript_id_9798seq_length_1421	27.4612	4.77932	5.08374	4.25817e-208	9.0459e-207	947.67
[UP]	scaffold_000137F_transcript_id_10294seq_length_4513	2.02705	1.01938	4.80705	3.333e-20	1.43126e-19	84.7811
[UP]	scaffold_001070F_transcript_id_410seq_length_3178	8.35538	3.06271	3.96174	9.67309e-64	9.19356e-63	284.084
[UP]	scaffold_000000F_transcript_id_26262seq_length_1279	4.75545	2.24958	7.14245	0	0	1596.53
[UP]	scaffold_000372F_transcript_id_2645seq_length_1915	21.7005	4.43966	7.64054	0	0	4916.75
[UP]	scaffold_000076F_transcript_id_10149seq_length_4652	9.94301	3.31368	8.5776	0	0	4661.95
[UP]	scaffold_000227F_transcript_id_427seq_length_1743	2.58777	1.37171	6.01311	3.1287e-74	3.29532e-73	332.238
[UP]	scaffold_000232F_transcript_id_5120seq_length_1385	17.3608	4.11777	6.03791	0	0	1613.53
[UP]	scaffold_000075F_transcript_id_16736seq_length_3529	2.16755	1.11607	6.17253	4.69525e-57	4.13338e-56	253.407
[UP]	scaffold_000178F_transcript_id_9873seq_length_2533	2.5805	1.36765	6.36304	1.00675e-92	1.265e-91	417.172
[UP]	scaffold_000050F_transcript_id_20200seq_length_1938	12.6616	3.66239	3.11728	1.54242e-43	1.11586e-42	191.439
[UP]	scaffold_000194F_transcript_id_6280seq_length_3172	3.17411	1.66635	2.33794	1.88374e-09	5.18765e-09	36.0904
[UP]	scaffold_000000F_transcript_id_26630seq_length_3315	2.04739	1.03378	8.06307	1.19541e-36	7.71325e-36	159.891
[UP]	scaffold_000273F_transcript_id_1896seq_length_1102	13.025	3.70322	4.24612	4.59546e-95	5.86243e-94	427.926
[UP]	scaffold_000375F_transcript_id_5217seq_length_1479	30.8611	4.94772	8.67074	0	0	8562.76
[UP]	scaffold_000434F_transcript_id_1163seq_length_3324	20.4769	4.35593	7.84667	0	0	5514.45
[UP]	scaffold_000705F_transcript_id_10387seq_length_1616	2.54664	1.34859	5.1741	1.27068e-41	8.93485e-41	182.663
[UP]	scaffold_000283F_transcript_id_3706seq_length_1707	21.225	4.40769	2.67269	1.05161e-37	6.8828e-37	164.723
[UP]	scaffold_000000F_transcript_id_26453seq_length_3159	24.9669	4.64195	9.81706	4.11444e-113	5.919e-112	510.864
[UP]	scaffold_000044F_transcript_id_17707seq_length_1648	3.44535	1.78465	7.69887	6.81913e-303	1.93698e-301	1383.84
[UP]	scaffold_000507F_transcript_id_12689seq_length_4806	2.26346	1.17853	2.24913	1.93396e-05	4.05177e-05	18.2533
[UP]	scaffold_000130F_transcript_id_15164seq_length_1876	4.25412	2.08886	7.09112	1.8166e-301	5.13101e-300	1377.28
[UP]	scaffold_000469F_transcript_id_277seq_length_1460	4.53622	2.18149	1.6117	1.11237e-08	2.92979e-08	32.6343
[UP]	scaffold_000214F_transcript_id_8925seq_length_5335	3.09963	1.63209	4.9029	4.44462e-48	3.47089e-47	212.246
[UP]	scaffold_000000F_transcript_id_26526seq_length_2011	7.44415	2.89611	0.401148	1.67155e-05	3.53376e-05	18.5311
[UP]	scaffold_000030F_transcript_id_22471seq_length_1282	3.04783	1.60778	2.84926	2.42528e-12	7.74467e-12	49.1058
[UP]	scaffold_000015F_transcript_id_22707seq_length_2263	14.7197	3.87968	10.0245	0	0	9130.31
[UP]	scaffold_000000F_transcript_id_27029seq_length_2346	10.5507	3.39927	6.48321	0	0	1795.21
[UP]	scaffold_000093F_transcript_id_18464seq_length_1683	2.78742	1.47893	5.95112	1.57071e-47	1.21431e-46	209.733
[UP]	scaffold_000473F_transcript_id_946seq_length_2544	25.7775	4.68804	9.77759	0	0	10765.1
[UP]	scaffold_000459F_transcript_id_434seq_length_2465	3.07587	1.621	3.08562	0.0120808	0.018682	6.29898
[UP]	scaffold_000010F_transcript_id_23277seq_length_1476	2.39686	1.26115	1.46168	0.00134428	0.00234704	10.2807
[UP]	scaffold_000307F_transcript_id_5604seq_length_2307	18.2389	4.18895	3.3107	4.35937e-56	3.79439e-55	248.968
[UP]	scaffold_000035F_transcript_id_20636seq_length_1853	2.05922	1.0421	1.77966	0.00136056	0.00237382	10.2585
[UP]	scaffold_000391F_transcript_id_2911seq_length_2144	104.873	6.7125	0.359326	2.01017e-09	5.52369e-09	35.9638
[UP]	scaffold_000158F_transcript_id_8414seq_length_2004	2.11882	1.08326	1.94428	0.000413461	0.000766317	12.4704
[UP]	scaffold_000216F_transcript_id_6792seq_length_1937	33.6369	5.07197	7.55316	0	0	5115.8
[UP]	scaffold_000015F_transcript_id_22924seq_length_2708	3.82831	1.93671	2.49101	6.16107e-13	2.01491e-12	51.7949
[UP]	scaffold_000049F_transcript_id_12686seq_length_3578	2.81134	1.49126	2.63816	1.17283e-09	3.26937e-09	37.014
[UP]	scaffold_000004F_transcript_id_24207seq_length_1910	14.7882	3.88637	5.97963	5.83E-322	1.7144E-320	1471.59
[UP]	scaffold_000200F_transcript_id_W8AZ85.1seq_length_504	2.08138	1.05754	1.40115	0.00490585	0.00801808	7.91382
[UP]	scaffold_000121F_transcript_id_14393seq_length_2648	23.9727	4.58332	3.01326	5.04303e-49	3.98161e-48	216.579
[UP]	scaffold_000300F_transcript_id_8665seq_length_2870	4.44484	2.15213	6.93981	1.5478e-286	4.18323e-285	1308.58
[UP]	scaffold_000459F_transcript_id_434seq_length_2465	21.2066	4.40644	4.30786	1.48236e-115	2.17623e-114	522.094
[UP]	scaffold_000048F_transcript_id_16631seq_length_1365	2.3204	1.21437	4.5409	4.84539e-23	2.25976e-22	97.7093
[UP]	scaffold_000012F_transcript_id_22079seq_length_2102	2.59202	1.37408	6.6313	3.44726e-111	4.9099e-110	502.025
[UP]	scaffold_000741F_transcript_id_6628seq_length_2756	11.7182	3.55068	4.82238	7.79717e-135	1.28801e-133	610.721
[UP]	scaffold_000265F_transcript_id_13252seq_length_2751	2.37991	1.25091	4.17569	9.74405e-07	2.28226e-06	23.978
[UP]	scaffold_000247F_transcript_id_8573seq_length_1305	8.90755	3.15503	3.44171	2.3395e-46	1.77445e-45	204.357
[UP]	scaffold_000117F_transcript_id_15304seq_length_1815	4.78967	2.25993	7.86222	0	0	2531.62
[UP]	scaffold_000433F_transcript_id_P13080.1seq_length_1773	7.34699	2.87715	7.17208	0	0	2304.2
[UP]	scaffold_000417F_transcript_id_2491seq_length_3204	2.91308	1.54254	0.271869	0.0124457	0.0192108	6.24624
[UP]	scaffold_000068F_transcript_id_17208seq_length_3057	2.63401	1.39726	8.55556	1.9047e-235	4.49375e-234	1073.49
[UP]	scaffold_000148F_transcript_id_2075seq_length_968	28.2015	4.8177	5.25167	1.66357e-234	3.91564e-233	1069.16
[UP]	scaffold_000082F_transcript_id_3348seq_length_2042	3.34508	1.74204	-0.0276892	0.0155146	0.0234708	5.85708
[UP]	scaffold_000225F_transcript_id_1667seq_length_1514	2.7546	1.46184	8.64822	2.997728257E-314	8.7633298052E-313	1436.11
[UP]	scaffold_000550F_transcript_id_6450seq_length_7505	2.93674	1.55421	7.9244	1.02906411753716E-310	0	1419.83
[UP]	scaffold_000033F_transcript_id_21197seq_length_1065	2.68379	1.42427	9.23421	1.55225e-244	3.75951e-243	1115.31
[UP]	scaffold_000013F_transcript_id_22663seq_length_3595	2.32774	1.21893	0.763721	0.012648	0.019499	6.21769
[UP]	scaffold_000584F_transcript_id_3178seq_length_3817	8.02853	3.00514	1.05322	8.41351e-09	2.2324e-08	33.1771
[UP]	scaffold_000005F_transcript_id_23968seq_length_2680	11.64	3.54101	0.441789	8.10019e-07	1.90748e-06	24.3339
[UP]	scaffold_000430F_transcript_id_8510seq_length_2280	2.01897	1.01362	3.11105	4.09974e-07	9.83683e-07	25.6468
[UP]	scaffold_000060F_transcript_id_15453seq_length_2371	2.13393	1.09351	6.651	9.68186e-75	1.0273e-73	334.577
[UP]	scaffold_000182F_transcript_id_3568seq_length_1585	2.02149	1.01542	5.07751	7.83282e-24	3.74177e-23	101.318
[UP]	scaffold_000118F_transcript_id_11335seq_length_1215	2.07052	1.04999	4.77958	4.32607e-07	1.0365e-06	25.5431
[UP]	scaffold_000674F_transcript_id_13199seq_length_711	2.10551	1.07417	5.40744	1.61222e-32	9.55419e-32	140.996
[UP]	scaffold_000059F_transcript_id_16403seq_length_2121	2.22195	1.15183	3.81485	2.5975e-13	8.63853e-13	53.4912
[UP]	scaffold_000366F_transcript_id_8007seq_length_2993	20.5084	4.35814	1.07921	1.73744e-12	5.58019e-12	49.7601
[UP]	scaffold_000398F_transcript_id_14145seq_length_2340	7.62063	2.92991	5.89902	2.91103e-223	6.54459e-222	1017.44
[UP]	scaffold_000013F_transcript_id_23133seq_length_1575	4.56985	2.19215	2.53862	6.90015e-16	2.55777e-15	65.1616
[UP]	scaffold_000085F_transcript_id_13746seq_length_3598	19.364	4.27531	3.84159	5.0576e-82	5.91055e-81	368.017
[UP]	scaffold_000049F_transcript_id_14218seq_length_1876	2.07966	1.05635	6.49807	1.45187e-11	4.46013e-11	45.598
[UP]	scaffold_000137F_transcript_id_10577seq_length_3528	2.21578	1.14782	3.32712	8.22599e-10	2.3059e-09	37.7058
[UP]	scaffold_000107F_transcript_id_2882seq_length_1248	7.28554	2.86504	1.51978	2.16566e-11	6.57236e-11	44.8149
[UP]	scaffold_000038F_transcript_id_7719seq_length_2334	21.5266	4.42805	6.31638	0	0	2066.36
[UP]	scaffold_000304F_transcript_id_6687seq_length_1811	2.56119	1.35681	3.75563	8.9436e-17	3.43066e-16	69.1897
[UP]	scaffold_000002F_transcript_id_24947seq_length_2642	6.37673	2.67282	9.27014	0	0	4380.07
[UP]	scaffold_000472F_transcript_id_8975seq_length_1083	2.59679	1.37673	6.31393	2.15786e-60	1.95809e-59	268.719
[UP]	scaffold_000543F_transcript_id_4046seq_length_2323	36.4362	5.1873	5.1709	1.31082e-232	3.05665e-231	1060.44
[UP]	scaffold_000569F_transcript_id_13467seq_length_985	26.1272	4.70748	7.71876	1.90214e-23	8.95435e-23	99.561
[UP]	scaffold_000418F_transcript_id_8178seq_length_1910	17.9957	4.16958	5.00291	2.121e-177	4.15375e-176	806.465
[UP]	scaffold_000452F_transcript_id_1012seq_length_677	3.18313	1.67045	5.47868	3.81553e-73	3.99356e-72	327.251
[UP]	scaffold_000109F_transcript_id_5868seq_length_4967	9.81376	3.29481	8.40225	0	0	5446.35
[UP]	scaffold_000250F_transcript_id_10209seq_length_4364	9.43986	3.23877	3.61162	1.35773e-53	1.1402e-52	237.532
[UP]	scaffold_000019F_transcript_id_22359seq_length_2082	25.8999	4.69487	12.7346	1.06821e-93	1.3541e-92	421.648
[UP]	scaffold_000152F_transcript_id_11187seq_length_495	2.4892	1.31568	4.62712	6.31968e-28	3.3742e-27	120.002
[UP]	scaffold_000020F_transcript_id_22761seq_length_6061	5.22298	2.38487	0.359329	0.000218244	0.000417223	13.6671
[UP]	scaffold_000113F_transcript_id_11838seq_length_2630	24.2546	4.60019	9.65096	0	0	10096.5
[UP]	scaffold_000107F_transcript_id_2904seq_length_1654	2.27753	1.18747	0.944293	0.00881683	0.0139223	6.85956
[UP]	scaffold_000050F_transcript_id_19060seq_length_2857	2.48428	1.31283	4.24906	8.66125e-22	3.89795e-21	92.0015
[UP]	scaffold_000000F_transcript_id_26253seq_length_5119	3.10985	1.63684	6.50575	9.01734e-139	1.52217e-137	628.822
[UP]	scaffold_000033F_transcript_id_21826seq_length_848	21.9554	4.45651	6.18049	0	0	1896.12
[UP]	scaffold_000026F_transcript_id_A0A0K8TTA3.1seq_length_684	3.08238	1.62404	5.71769	1.02693e-81	1.19455e-80	366.604
[UP]	scaffold_001193F_transcript_id_1843seq_length_742	2.9154	1.54369	2.33794	1.86295e-08	4.83057e-08	31.6324
[UP]	scaffold_000675F_transcript_id_830seq_length_2390	40.1121	5.32596	1.1545	6.71751e-15	2.39873e-14	60.6792
[UP]	scaffold_000088F_transcript_id_14209seq_length_2262	2.95777	1.56451	1.27186	0.0001355	0.000263714	14.5637
[UP]	scaffold_000190F_transcript_id_11490seq_length_3039	2.63438	1.39747	11.4342	3.98541e-107	5.52721e-106	483.351
[UP]	scaffold_000047F_transcript_id_18994seq_length_2573	12.2377	3.61326	8.55678	0	0	6361.4
[UP]	scaffold_000050F_transcript_id_19010seq_length_2902	3.33686	1.73849	0.557269	0.00173679	0.00299297	9.8088
[UP]	scaffold_000067F_transcript_id_13014seq_length_3030	4.5075	2.17233	11.7856	0	0	5890.95
[UP]	scaffold_000012F_transcript_id_21514seq_length_1847	7.50312	2.90749	6.88644	0	0	1940.74
[UP]	scaffold_000307F_transcript_id_5650seq_length_2043	14.0013	3.80749	3.6249	6.60446e-64	6.29495e-63	284.845
[UP]	scaffold_000039F_transcript_id_22146seq_length_3243	2.72927	1.44851	1.10476	0.000834356	0.00149181	11.1632
[UP]	scaffold_000000F_transcript_id_26692seq_length_1401	8.78863	3.13564	1.1545	7.66585e-10	2.15249e-09	37.8434
[UP]	scaffold_000000F_transcript_id_26540seq_length_1483	3.14898	1.65489	8.90032	3.14568e-176	6.13653e-175	801.078
[UP]	scaffold_000036F_transcript_id_19423seq_length_1196	2.15174	1.1055	5.88916	1.03147e-46	7.86509e-46	205.987
[UP]	scaffold_000182F_transcript_id_3528seq_length_1391	2.11625	1.08151	7.75027	1.48265e-145	2.57652e-144	660.015
[UP]	scaffold_000173F_transcript_id_7457seq_length_518	22.2793	4.47763	4.17859	4.30895e-107	5.96766e-106	483.196
[UP]	scaffold_000242F_transcript_id_16189seq_length_1456	25.7693	4.68758	9.05687	0	0	9441.38
[UP]	scaffold_000126F_transcript_id_14469seq_length_2991	2.51749	1.33199	8.75702	1.55229e-104	2.11191e-103	471.447
[UP]	scaffold_000002F_transcript_id_24808seq_length_964	2.07869	1.05567	7.25455	1.44301e-102	1.93955e-101	462.402
[UP]	scaffold_000033F_transcript_id_21854seq_length_3121	23.1557	4.5333	7.73623	0	0	5310.52
[UP]	scaffold_000137F_transcript_id_10541seq_length_1988	12.5374	3.64817	2.32711	2.61737e-25	1.3031e-24	108.053
[UP]	scaffold_000264F_transcript_id_1498seq_length_4799	2.15111	1.10508	7.5144	4.44758e-131	7.19288e-130	593.452
[UP]	scaffold_000100F_transcript_id_15509seq_length_2251	3.75643	1.90936	4.7515	5.0096e-56	4.3528e-55	248.691
[UP]	scaffold_001089F_transcript_id_3232seq_length_590	2.0547	1.03893	4.74752	4.17545e-20	1.78614e-19	84.3355
[UP]	scaffold_000071F_transcript_id_8334seq_length_2651	19.7926	4.30689	3.79137	1.00998e-79	1.15082e-78	357.452
[UP]	scaffold_000307F_transcript_id_5755seq_length_411	2.94415	1.55785	0.856828	0.00125571	0.00220046	10.4065
[UP]	scaffold_000000F_transcript_id_26612seq_length_1655	24.9898	4.64326	9.5968	0	0	10713.5
[UP]	scaffold_000449F_transcript_id_107seq_length_1623	16.9276	4.08131	5.4539	2.20557e-236	5.22818e-235	1077.8
[UP]	scaffold_000752F_transcript_id_46seq_length_1972	3.33686	1.73849	0.55727	0.00173679	0.00299297	9.8088
[UP]	scaffold_000148F_transcript_id_2119seq_length_1593	18.4334	4.20425	7.97521	0	0	5799.41
[UP]	scaffold_000425F_transcript_id_2442seq_length_1305	36.6661	5.19637	6.35409	0	0	2367.23
[UP]	scaffold_000100F_transcript_id_15603seq_length_1422	10.7716	3.42916	3.3486	1.10777e-47	8.58395e-47	210.428
[UP]	scaffold_000979F_transcript_id_1179seq_length_2196	2.4371	1.28517	6.23379	2.1355e-76	2.32746e-75	342.183
[UP]	scaffold_000063F_transcript_id_16658seq_length_1627	22.8908	4.5167	3.11099	7.16827e-52	5.88185e-51	229.633
[UP]	scaffold_000167F_transcript_id_16983seq_length_1645	21.5002	4.42627	2.68966	2.87745e-38	1.90695e-37	167.3
[UP]	scaffold_000520F_transcript_id_882seq_length_2324	2.83105	1.50134	0.698131	0.00342016	0.00568913	8.56857
[UP]	scaffold_000089F_transcript_id_15595seq_length_2540	7.40749	2.88899	6.31852	8.48431e-290	2.32438e-288	1323.58
[UP]	scaffold_000114F_transcript_id_14106seq_length_1442	13.4136	3.74563	0.59379	6.16314e-08	1.55858e-07	29.3114
[UP]	scaffold_000020F_transcript_id_23705seq_length_1527	29.2928	4.87248	9.16784	0	0	9678.32
[UP]	scaffold_000131F_transcript_id_13063seq_length_4155	22.8135	4.51182	8.65372	0	0	8000.68
[UP]	scaffold_000184F_transcript_id_12582seq_length_2520	4.96396	2.31149	6.411	2.84994e-226	6.49462e-225	1031.28
[UP]	scaffold_000156F_transcript_id_9347seq_length_753	5.47759	2.45354	4.94055	1.41112e-92	1.77088e-91	416.499
[UP]	scaffold_000097F_transcript_id_10781seq_length_1601	2.21812	1.14934	3.72303	1.57185e-12	5.06458e-12	49.9566
[UP]	scaffold_000221F_transcript_id_2229seq_length_6087	3.88726	1.95875	0.698131	0.000247601	0.000469496	13.4302
[UP]	scaffold_000148F_transcript_id_2092seq_length_1915	3.81456	1.93152	0.0792251	0.00559277	0.00909041	7.67704
[UP]	scaffold_000555F_transcript_id_10497seq_length_1537	14.1218	3.81985	6.61721	0	0	2215.58
[UP]	scaffold_000194F_transcript_id_6372seq_length_2237	32.2	5.00899	6.88952	0	0	3300.27
[UP]	scaffold_000012F_transcript_id_21964seq_length_3549	6.08639	2.60559	7.62925	0	0	2696.29
[UP]	scaffold_000434F_transcript_id_1156seq_length_2514	10.607	3.40695	2.50064	1.32282e-26	6.81949e-26	113.97
[UP]	scaffold_000232F_transcript_id_5010seq_length_2628	37.3584	5.22336	1.82643	1.63554e-23	7.72105e-23	99.8601
[UP]	scaffold_000015F_transcript_id_22236seq_length_1583	2.72263	1.445	5.88911	6.15187e-75	6.55524e-74	335.481
[UP]	scaffold_000203F_transcript_id_9797seq_length_1225	2.04485	1.032	3.16059	1.58851e-07	3.91737e-07	27.4785
[UP]	scaffold_000496F_transcript_id_6688seq_length_3054	2.31303	1.20978	7.83297	5.28393e-188	1.06603e-186	855.237
[UP]	scaffold_000667F_transcript_id_12784seq_length_990	17.3214	4.11448	7.37465	0	0	3795.4
[UP]	scaffold_000009F_transcript_id_26649seq_length_2785	13.1455	3.71649	7.475	0	0	3765.73
[UP]	scaffold_000022F_transcript_id_21636seq_length_1732	16.9595	4.08402	2.17872	2.70844e-25	1.34777e-24	107.985
[UP]	scaffold_000002F_transcript_id_W4VRA2.1seq_length_11679	2.35477	1.23559	10.0323	1.50981e-225	3.43285e-224	1027.95
[UP]	scaffold_000480F_transcript_id_6103seq_length_2109	5.27026	2.39787	5.87978	4.9214e-168	9.31073e-167	763.389
[UP]	scaffold_000065F_transcript_id_17245seq_length_4095	8.94407	3.16093	3.49578	3.4107e-48	2.66972e-47	212.773
[UP]	scaffold_000405F_transcript_id_13080seq_length_3230	17.4355	4.12396	6.85097	0	0	2774.81
[UP]	scaffold_000675F_transcript_id_P42660.3seq_length_1359	23.3507	4.5454	6.58864	0	0	2527.73
[UP]	scaffold_000125F_transcript_id_12785seq_length_3479	21.3881	4.41874	5.47607	2.57531e-256	6.42355e-255	1169.51
[UP]	scaffold_000308F_transcript_id_4433seq_length_2169	3.29264	1.71925	2.6981	2.09414e-12	6.7022e-12	49.3937
[UP]	scaffold_000242F_transcript_id_16160seq_length_2203	25.3119	4.66175	10.842	0	0	13019.8
[UP]	scaffold_000108F_transcript_id_13629seq_length_1685	4.00686	2.00247	5.21857	1.92345e-82	2.25046e-81	369.945
[UP]	scaffold_000025F_transcript_id_19677seq_length_2017	2.77412	1.47203	3.96179	7.0416e-22	3.18046e-21	92.4112
[UP]	scaffold_000160F_transcript_id_10654seq_length_1594	10.2773	3.36139	3.81091	6.1185e-64	5.83732e-63	284.997
[UP]	scaffold_000127F_transcript_id_12375seq_length_2208	5.21135	2.38166	9.04161	0	0	3105.12
[UP]	scaffold_000033F_transcript_id_U5EYA8.1seq_length_789	9.41661	3.23521	4.7635	4.64179e-117	6.8953e-116	529.008
[UP]	scaffold_000033F_transcript_id_21886seq_length_1625	6.08615	2.60553	5.09181	2.16296e-111	3.08947e-110	502.955
[UP]	scaffold_000076F_transcript_id_9790seq_length_2251	21.5028	4.42645	6.37523	0	0	2148.58
[UP]	scaffold_000250F_transcript_id_10150seq_length_2509	5.04932	2.33609	1.99977	3.5447e-12	1.12157e-11	48.3614
[UP]	scaffold_000038F_transcript_id_7627seq_length_1495	3.44326	1.78378	2.06626	8.42926e-09	2.23599e-08	33.1735
[UP]	scaffold_000055F_transcript_id_12756seq_length_1012	9.91773	3.31001	1.02675	1.55721e-09	4.31331e-09	36.4614
[UP]	scaffold_000303F_transcript_id_4256seq_length_2188	4.60812	2.20418	0.481318	0.000240445	0.000456532	13.4853
[UP]	scaffold_000351F_transcript_id_4709seq_length_2225	3.50176	1.80808	5.30234	4.19806e-74	4.41237e-73	331.652
[UP]	scaffold_000069F_transcript_id_8497seq_length_3394	2.39325	1.25897	6.73968	4.9924e-102	6.69235e-101	459.925
[UP]	scaffold_000001F_transcript_id_25455seq_length_1545	6.40363	2.67889	6.59835	2.09627198E-315	6.1459997454E-314	1441.42
[UP]	scaffold_000158F_transcript_id_8226seq_length_3333	3.83131	1.93784	1.77965	2.97939e-08	7.65813e-08	30.7209
[UP]	scaffold_000089F_transcript_id_A0A0K8TPL2.1seq_length_681	3.54909	1.82745	8.75747	0	0	2416.51
[UP]	scaffold_000265F_transcript_id_14233seq_length_1181	4.21704	2.07623	5.24032	1.81009e-88	2.22151e-87	397.626
[UP]	scaffold_000743F_transcript_id_1697seq_length_1909	2.00355	1.00256	4.57329	6.1125e-17	2.36003e-16	69.9404
[UP]	scaffold_000000F_transcript_id_26293seq_length_1788	19.0634	4.25273	5.70192	2.02483e-289	5.53214e-288	1321.84
[UP]	scaffold_000039F_transcript_id_22114seq_length_3855	16.0671	4.00603	9.36937	0	0	1738.92
[UP]	scaffold_000000F_transcript_id_26437seq_length_4137	4.14093	2.04996	3.60718	3.60346e-29	1.96797e-28	125.685
[UP]	scaffold_000855F_transcript_id_425seq_length_4562	2.41335	1.27104	8.3874	1.32748e-113	1.9235e-112	513.122
[UP]	scaffold_000087F_transcript_id_9950seq_length_1554	6.37237	2.67183	1.88656	2.19899e-13	7.33263e-13	53.8184
[UP]	scaffold_000019F_transcript_id_23098seq_length_1336	2.90601	1.53904	1.50068	3.98683e-05	8.13346e-05	16.8776
[UP]	scaffold_000065F_transcript_id_19173seq_length_1192	3.31388	1.72852	3.11103	2.75881e-16	1.03722e-15	66.9685
[UP]	scaffold_000178F_transcript_id_9972seq_length_2315	5.09193	2.34821	6.50145	2.50314e-118	3.74612e-117	534.838
[UP]	scaffold_000083F_transcript_id_15846seq_length_1988	2.26477	1.17936	4.92101	5.43611e-28	2.90553e-27	120.301
[UP]	scaffold_000114F_transcript_id_13343seq_length_2462	2.59877	1.37783	2.49102	7.54337e-08	1.89425e-07	28.9199
[UP]	scaffold_000096F_transcript_id_10903seq_length_1697	7.48508	2.90402	5.1815	2.10891e-136	3.52435e-135	617.93
[UP]	scaffold_000107F_transcript_id_2880seq_length_873	4.98838	2.31857	0.0267569	0.00181321	0.0031148	9.72963
[UP]	scaffold_000672F_transcript_id_2603seq_length_2476	22.601	4.49831	2.75562	1.59886e-40	1.10336e-39	177.626
[UP]	scaffold_000199F_transcript_id_10083seq_length_1246	3.34162	1.74055	9.16025	0	0	2200.39
[UP]	scaffold_000081F_transcript_id_17095seq_length_1861	2.27875	1.18824	7.4964	4.95306e-148	8.72835e-147	671.401
[UP]	scaffold_000173F_transcript_id_7452seq_length_1345	29.1371	4.86479	4.47378	5.83282e-139	9.86267e-138	629.692
[UP]	scaffold_000153F_transcript_id_10146seq_length_5207	2.08416	1.05947	3.70227	7.78767e-11	2.30617e-10	42.3104
[UP]	scaffold_000148F_transcript_id_2121seq_length_1644	24.7673	4.63036	7.82308	0	0	5472.74
[UP]	scaffold_000167F_transcript_id_17851seq_length_1919	2.19233	1.13247	5.19951	3.23752e-31	1.86353e-30	135.039
[UP]	scaffold_000119F_transcript_id_15815seq_length_2179	16.5523	4.04896	7.27635	0	0	3600.11
[UP]	scaffold_000039F_transcript_id_21767seq_length_848	2.02134	1.01532	5.90741	1.46194e-40	1.00956e-39	177.804
[UP]	scaffold_000300F_transcript_id_9007seq_length_2471	2.23582	1.16081	7.46349	5.34701e-139	9.0565e-138	629.865
[UP]	scaffold_000223F_transcript_id_340seq_length_4050	15.4656	3.95099	7.32533	0	0	3632.35
[UP]	scaffold_000154F_transcript_id_13018seq_length_2628	6.24574	2.64287	8.49119	0	0	4164.98
[UP]	scaffold_000283F_transcript_id_3706seq_length_1707	15.975	3.99774	3.58464	5.30212e-65	5.10705e-64	289.872
[UP]	scaffold_000636F_transcript_id_C4WWB6.1seq_length_348	128.844	7.00948	0.593789	2.87755e-11	8.66984e-11	44.2585
[UP]	scaffold_000135F_transcript_id_14491seq_length_2850	3.61206	1.85282	0.629419	0.000664179	0.00119952	11.5869
[UP]	scaffold_000000F_transcript_id_26337seq_length_2211	2.11457	1.08036	1.98611	0.011831	0.0183183	6.33603
[UP]	scaffold_000348F_transcript_id_13367seq_length_2649	14.7952	3.88706	7.53985	0	0	4102.52
[UP]	scaffold_000502F_transcript_id_7314seq_length_2223	16.5447	4.0483	6.68062	0	0	2439.8
[UP]	scaffold_000000F_transcript_id_27169seq_length_5488	2.92677	1.54931	7.74633	3.67677e-277	9.62583e-276	1265.43
[UP]	scaffold_000074F_transcript_id_5710seq_length_1047	2.01288	1.00926	6.23745	1.38092e-49	1.09718e-48	219.157
[UP]	scaffold_000078F_transcript_id_18640seq_length_1118	16.5333	4.04731	5.04143	1.85268e-177	3.63539e-176	806.735
[UP]	scaffold_000219F_transcript_id_11706seq_length_2638	11.1837	3.48333	4.78537	7.10648e-129	1.12748e-127	583.321
[UP]	scaffold_000482F_transcript_id_3474seq_length_2109	2.17119	1.11849	4.76962	1.14535e-20	4.97806e-20	86.8933
[UP]	scaffold_000000F_transcript_id_26526seq_length_2011	3.45319	1.78793	1.59379	1.31634e-06	3.04754e-06	23.3992
[UP]	scaffold_000480F_transcript_id_6103seq_length_2109	3.39933	1.76525	5.59131	2.51817e-86	3.04214e-85	387.78
[UP]	scaffold_000259F_transcript_id_14413seq_length_1023	2.28901	1.19473	7.58266	2.0765e-139	3.52302e-138	631.754
[UP]	scaffold_000079F_transcript_id_15010seq_length_1898	13.8721	3.79412	2.95128	3.31202e-40	2.27463e-39	176.177
[UP]	scaffold_000469F_transcript_id_277seq_length_1460	2.80938	1.49025	2.7954	1.24305e-10	3.6296e-10	41.3961
[UP]	scaffold_000415F_transcript_id_4359seq_length_1959	2.14728	1.10251	6.57312	3.50397e-72	3.62958e-71	322.83
[UP]	scaffold_000342F_transcript_id_2404seq_length_2527	5.81367	2.53945	1.10475	1.47496e-07	3.64272e-07	27.6219
[UP]	scaffold_000598F_transcript_id_6535seq_length_2461	3.34508	1.74204	-0.0276898	0.0155145	0.0234708	5.85708
[UP]	scaffold_000391F_transcript_id_2911seq_length_2144	28.6665	4.84129	8.15649	0	0	7073.38
[UP]	scaffold_000464F_transcript_id_12032seq_length_3041	2.89998	1.53604	4.43918	4.90644e-32	2.87701e-31	138.786
[UP]	scaffold_000006F_transcript_id_25371seq_length_2428	2.01655	1.01189	6.38995	6.29746e-55	5.38777e-54	243.649
[UP]	scaffold_000019F_transcript_id_21559seq_length_1708	22.5998	4.49824	7.31543	0	0	4034.7
[UP]	scaffold_000257F_transcript_id_7480seq_length_2810	20.3822	4.34924	6.12934	0	0	1796.93
[UP]	scaffold_000126F_transcript_id_C4WYE6.1seq_length_645	8.52036	3.09091	2.52921	2.06518e-24	1.0023e-23	103.959
[UP]	scaffold_000370F_transcript_id_8105seq_length_2643	19.3577	4.27484	0.316258	3.09228e-07	7.49669e-07	26.1912
[UP]	scaffold_000023F_transcript_id_21869seq_length_2042	27.3965	4.77592	9.01606	0	0	9350.77
[UP]	scaffold_000158F_transcript_id_8245seq_length_1695	2.96543	1.56824	1.59379	1.51562e-05	3.21632e-05	18.7178
[UP]	scaffold_000154F_transcript_id_12778seq_length_1746	5.36821	2.42444	0.629415	2.71569e-05	5.61331e-05	17.6071
[UP]	scaffold_000430F_transcript_id_8507seq_length_1118	2.02674	1.01916	2.72306	9.3768e-06	2.02632e-05	19.6344
[UP]	scaffold_000065F_transcript_id_17245seq_length_4095	14.135	3.8212	3.26047	5.43318e-50	4.33401e-49	221.015
[UP]	scaffold_000019F_transcript_id_22605seq_length_1005	2.98012	1.57537	6.66812	1.98581e-144	3.43306e-143	654.833
[UP]	scaffold_000010F_transcript_id_22461seq_length_1514	2.79449	1.48259	6.49313	5.92918e-45	4.39408e-44	197.923
[UP]	scaffold_000161F_transcript_id_7091seq_length_5946	2.13365	1.09332	4.68117	4.74047e-21	2.08021e-20	88.6382
[UP]	scaffold_000234F_transcript_id_1239seq_length_1601	3.60055	1.84822	8.14273	1.35607e-113	1.9621e-112	513.079
[UP]	scaffold_000007F_transcript_id_25572seq_length_1330	3.25882	1.70435	8.07176	4.33388e-193	8.88667e-192	878.633
[UP]	scaffold_000130F_transcript_id_15392seq_length_4155	3.31652	1.72967	4.56406	3.04093e-42	2.15639e-41	185.508
[UP]	scaffold_000026F_transcript_id_19125seq_length_2323	2.29792	1.20033	3.32711	1.5629e-10	4.54632e-10	40.9486
[UP]	scaffold_000129F_transcript_id_17085seq_length_1234	14.5715	3.86508	5.08697	1.74708e-175	3.38838e-174	797.653
[UP]	scaffold_000419F_transcript_id_9919seq_length_2940	2.27932	1.1886	3.62498	0.0020117	0.00343162	9.53883
[UP]	scaffold_000695F_transcript_id_4729seq_length_3503	2.67816	1.42124	3.58471	0.00427814	0.00704036	8.16182
[UP]	scaffold_000010F_transcript_id_22132seq_length_2957	3.39358	1.76281	5.74938	1.26008e-95	1.61777e-94	430.508
[UP]	scaffold_000100F_transcript_id_15603seq_length_1422	12.0556	3.59163	4.26039	4.23372e-93	5.34654e-92	418.901
[UP]	scaffold_000005F_transcript_id_23463seq_length_1910	5.14105	2.36206	7.99776	0	0	2941.48
[UP]	scaffold_000123F_transcript_id_13850seq_length_3684	2.30368	1.20394	9.35827	3.86689e-307	1.11739e-305	1403.38
[UP]	scaffold_000455F_transcript_id_11962seq_length_1004	22.2476	4.47558	5.22574	1.65952e-218	3.6733e-217	995.557
[UP]	scaffold_000002F_transcript_id_24852seq_length_4396	3.20763	1.68151	1.51978	7.95775e-06	1.73123e-05	19.948
[UP]	scaffold_000001F_transcript_id_25376seq_length_1598	2.96015	1.56567	4.03001	2.73583e-25	1.36072e-24	107.965
[UP]	scaffold_000000F_transcript_id_27005seq_length_1239	30.5412	4.93268	11.7455	0	0	14011.3
[UP]	scaffold_000623F_transcript_id_4340seq_length_1123	2.28423	1.19171	2.9792	1.93375e-08	5.01025e-08	31.56
[UP]	scaffold_000009F_transcript_id_27116seq_length_2662	3.47814	1.79832	0.886575	0.000224577	0.000428838	13.6134
[UP]	scaffold_000084F_transcript_id_16049seq_length_2359	5.6346	2.49431	6.15106	7.86821e-213	1.71138e-211	969.445
[UP]	scaffold_000045F_transcript_id_19393seq_length_1900	17.3626	4.11791	9.04575	4.92023e-306	1.41362e-304	1398.3
[UP]	scaffold_000195F_transcript_id_6183seq_length_2557	7.38213	2.88404	2.44175	3.06809e-21	1.35642e-20	89.4989
[UP]	scaffold_000258F_transcript_id_6819seq_length_1370	2.54123	1.34552	6.18152	4.38908e-80	5.0354e-79	359.115
[UP]	scaffold_000043F_transcript_id_17118seq_length_1225	3.7007	1.8878	2.14221	5.41138e-10	1.53233e-09	38.5229
[UP]	scaffold_000110F_transcript_id_8749seq_length_1563	2.14607	1.10169	6.29748	2.09413e-60	1.90198e-59	268.779
[UP]	scaffold_000417F_transcript_id_2491seq_length_3204	3.17422	1.6664	0.664186	0.00158091	0.00273401	9.98184
[UP]	scaffold_000065F_transcript_id_17177seq_length_2098	4.91542	2.29732	5.71866	8.49352e-142	1.44838e-140	642.735
[UP]	scaffold_000121F_transcript_id_15694seq_length_2419	20.311	4.34419	9.12129	0	0	8882.2
[UP]	scaffold_000189F_transcript_id_4916seq_length_1779	20.5084	4.35814	1.07921	1.73744e-12	5.58019e-12	49.7601
[UP]	scaffold_000026F_transcript_id_19177seq_length_937	2.15753	1.10938	6.46144	3.44878e-17	1.33931e-16	71.0694
[UP]	scaffold_000616F_transcript_id_9233seq_length_2429	20.3677	4.34821	7.3684	0	0	4062.92
[UP]	scaffold_000067F_transcript_id_12644seq_length_3335	4.60812	2.20418	0.481321	0.000240446	0.000456532	13.4853
[UP]	scaffold_000044F_transcript_id_15533seq_length_1124	2.74942	1.45913	8.38096	6.64083e-174	1.283e-172	790.387
[UP]	scaffold_000251F_transcript_id_3209seq_length_2189	2.72583	1.4467	4.80312	8.48571e-37	5.48943e-36	160.572
[UP]	scaffold_000174F_transcript_id_6738seq_length_2023	3.94697	1.98074	1.81101	1.14433e-08	3.01239e-08	32.5792
[UP]	scaffold_000002F_transcript_id_25189seq_length_1476	2.0866	1.06116	5.34588	1.37479e-30	7.75747e-30	132.168
[UP]	scaffold_000033F_transcript_id_21044seq_length_2608	14.4506	3.85306	3.96522	1.58064e-81	1.83438e-80	365.744
[UP]	scaffold_000355F_transcript_id_3077seq_length_2674	4.35504	2.12268	6.05124	1.68506e-79	1.90271e-78	356.432
[UP]	scaffold_000676F_transcript_id_358seq_length_3955	2.54248	1.34624	6.80682	5.07886e-120	7.70435e-119	542.619
[UP]	scaffold_000040F_transcript_id_17904seq_length_4586	9.13299	3.19109	8.3033	0	0	4984.06
[UP]	scaffold_000298F_transcript_id_12090seq_length_2034	43.8758	5.45535	6.20278	0	0	2198.79
[UP]	scaffold_001387F_transcript_id_5318seq_length_1153	17.2717	4.11034	4.73924	1.78543e-146	3.11349e-145	664.242
[UP]	scaffold_000004F_transcript_id_23490seq_length_2181	30.1351	4.91337	8.14462	1.30343e-166	2.4429e-165	756.845
[UP]	scaffold_000710F_transcript_id_6465seq_length_2016	6.41115	2.68058	3.49579	2.09161e-39	1.41515e-38	172.512
[UP]	scaffold_000656F_transcript_id_3646seq_length_1283	2.82951	1.50055	3.26051	1.79046e-09	4.94571e-09	36.1894
[UP]	scaffold_000026F_transcript_id_17586seq_length_3506	2.46278	1.30029	7.50927	1.22638e-175	2.38774e-174	798.36
[UP]	scaffold_000056F_transcript_id_11450seq_length_3598	2.65232	1.40726	6.48347	2.1286e-105	2.92777e-104	475.412
[UP]	scaffold_000507F_transcript_id_12689seq_length_4806	2.04234	1.03022	3.23184	7.98118e-08	2.00369e-07	28.8106
[UP]	scaffold_000300F_transcript_id_8716seq_length_2222	11.64	3.54101	0.441789	8.10019e-07	1.90748e-06	24.3339
[UP]	scaffold_000052F_transcript_id_18438seq_length_2313	5.29691	2.40515	8.29982	0	0	3435.92
[UP]	scaffold_000001F_transcript_id_25449seq_length_3132	6.45111	2.68955	5.64984	4.13678e-169	7.84112e-168	768.336
[UP]	scaffold_000000F_transcript_id_26347seq_length_985	2.31295	1.20974	7.31214	2.19989e-136	3.67027e-135	617.845
[UP]	scaffold_000068F_transcript_id_17797seq_length_4374	2.02697	1.01933	8.18515	8.34438e-09	2.21523e-08	33.1932
[UP]	scaffold_000044F_transcript_id_15481seq_length_2357	4.81063	2.26623	1.46168	2.78324e-08	7.16865e-08	30.8531
[UP]	scaffold_000049F_transcript_id_12198seq_length_1928	22.4194	4.48668	3.6896	9.52995e-77	1.0432e-75	343.792
[UP]	scaffold_000007F_transcript_id_24985seq_length_3770	2.50551	1.3251	4.23757	3.2819e-19	1.36716e-18	80.2603
[UP]	scaffold_000194F_transcript_id_6372seq_length_2237	20.8679	4.38322	6.16161	0	0	1847.85
[UP]	scaffold_000092F_transcript_id_13303seq_length_2895	27.626	4.78795	10.8608	0	0	11971.2
[UP]	scaffold_000433F_transcript_id_2982seq_length_2548	5.41766	2.43767	2.0792	1.49692e-13	5.02836e-13	54.5741
[UP]	scaffold_000254F_transcript_id_16727seq_length_2111	19.8337	4.30988	4.99951	6.47462e-182	1.27797e-180	827.233
[UP]	scaffold_000112F_transcript_id_17712seq_length_2213	3.73861	1.9025	3.9084	8.37809e-32	4.87846e-31	137.723
[UP]	scaffold_000043F_transcript_id_17551seq_length_2250	31.8854	4.99482	8.63753	0	0	8451.35
[UP]	scaffold_000031F_transcript_id_18900seq_length_1302	112.864	6.81844	0.441787	4.86948e-10	1.38357e-09	38.7289
[UP]	scaffold_000303F_transcript_id_4252seq_length_2520	20.6862	4.3706	8.5695	0	0	6838.83
[UP]	scaffold_000216F_transcript_id_6782seq_length_431	27.2883	4.77021	2.27182	2.8757e-30	1.61539e-29	130.703
[UP]	scaffold_000158F_transcript_id_8791seq_length_834	2.41949	1.2747	5.79426	1.40488e-56	1.23028e-55	251.224
[UP]	scaffold_000052F_transcript_id_18695seq_length_2502	3.77708	1.91727	6.55224	8.53254e-186	1.71454e-184	845.081
[UP]	scaffold_000065F_transcript_id_17226seq_length_2064	7.29908	2.86771	4.92986	2.77106e-113	3.9979e-112	511.653
[UP]	scaffold_000559F_transcript_id_9387seq_length_1878	3.30771	1.72583	5.42014	2.89911e-74	3.05994e-73	332.39
[UP]	scaffold_000052F_transcript_id_C4WWE6.1seq_length_549	2.01897	1.01362	6.04235	4.23908e-44	3.10031e-43	194.009
[UP]	scaffold_000350F_transcript_id_2273seq_length_2659	4.47874	2.16309	9.13053	0	0	3580.37
[UP]	scaffold_000056F_transcript_id_11486seq_length_3779	12.8083	3.67901	9.26448	0	0	7883.26
[UP]	scaffold_000005F_transcript_id_24326seq_length_1502	6.64276	2.73178	7.00682	0	0	1933.45
[UP]	scaffold_000321F_transcript_id_15195seq_length_2530	2.60826	1.38309	7.01002	2.55449e-143	4.401e-142	649.732
[UP]	scaffold_000044F_transcript_id_15821seq_length_2282	9.06159	3.17976	7.1863	0	0	2633.95
[UP]	scaffold_000026F_transcript_id_18544seq_length_3349	25.8061	4.68964	7.55434	0	0	4853.2
[UP]	scaffold_000532F_transcript_id_5921seq_length_1013	2.05792	1.04119	2.8341	0.00762155	0.0121593	7.12031
[UP]	scaffold_000035F_transcript_id_20102seq_length_3711	2.28968	1.19515	1.82645	0.000213868	0.000409091	13.7051
[UP]	scaffold_000007F_transcript_id_24985seq_length_3770	3.47205	1.79579	6.14577	5.05757e-128	7.97363e-127	579.403
[UP]	scaffold_000041F_transcript_id_18252seq_length_1016	2.04317	1.03081	7.29704	8.62812e-101	1.15045e-99	454.238
[UP]	scaffold_000050F_transcript_id_20236seq_length_2228	11.0689	3.46844	1.4216	4.98751e-13	1.63752e-12	52.2099
[UP]	scaffold_001047F_transcript_id_900seq_length_1992	16.0049	4.00044	5.05458	3.37092e-177	6.58873e-176	805.539
[UP]	scaffold_000102F_transcript_id_15256seq_length_3277	3.2054	1.6805	3.02002	1.02739e-14	3.635e-14	59.8429
[UP]	scaffold_000002F_transcript_id_24962seq_length_2860	6.14601	2.61965	6.97346	0	0	1786.6
[UP]	scaffold_000212F_transcript_id_11339seq_length_4335	8.20553	3.0366	6.49414	0	0	1583.87
[UP]	scaffold_000035F_transcript_id_20142seq_length_2105	15.2191	3.92781	6.52984	0	0	2147.49
[UP]	scaffold_000300F_transcript_id_8912seq_length_3350	18.8022	4.23283	5.95089	0	0	1558.17
[UP]	scaffold_000574F_transcript_id_7103seq_length_1031	25.8652	4.69294	5.91795	0	0	1651.64
[UP]	scaffold_000303F_transcript_id_4253seq_length_6027	21.9298	4.45482	8.56001	0	0	7666.52
[UP]	scaffold_000076F_transcript_id_9697seq_length_1791	7.85534	2.97367	8.62278	0	0	4606.71
[UP]	scaffold_000514F_transcript_id_621seq_length_3001	5.32481	2.41273	3.77957	2.1159e-41	1.48054e-40	181.649
[UP]	scaffold_000040F_transcript_id_17984seq_length_2428	2.68245	1.42355	0.886574	0.00272882	0.00459786	8.98046
[UP]	scaffold_000526F_transcript_id_6826seq_length_2265	2.72232	1.44483	4.64026	5.31196e-33	3.1894e-32	143.201
[UP]	scaffold_000460F_transcript_id_6897seq_length_1652	28.7812	4.84705	7.56729	0	0	5009.51
[UP]	scaffold_000224F_transcript_id_11965seq_length_4236	3.23788	1.69505	7.27632	2.82705e-241	6.76536e-240	1100.31
[UP]	scaffold_000105F_transcript_id_16762seq_length_2943	2.42883	1.28026	7.61712	1.01053e-47	7.84254e-47	210.611
[UP]	scaffold_000246F_transcript_id_1738seq_length_947	2.09522	1.0671	3.22021	3.30306e-08	8.45756e-08	30.5208
[UP]	scaffold_000019F_transcript_id_23131seq_length_2253	9.30621	3.21819	2.88652	1.59628e-32	9.46535e-32	141.016
[UP]	scaffold_000022F_transcript_id_20748seq_length_1248	2.23979	1.16336	5.55711	2.91991e-41	2.03602e-40	181.008
[UP]	scaffold_000557F_transcript_id_4016seq_length_1764	5.23799	2.38901	7.77075	0	0	1968.41
[UP]	scaffold_000000F_transcript_id_26586seq_length_3723	2.85586	1.51392	3.37511	1.07156e-15	3.94004e-15	64.2943
[UP]	scaffold_000101F_transcript_id_12280seq_length_1295	3.27755	1.71262	8.3437	0	0	1578.28
[UP]	scaffold_000069F_transcript_id_8672seq_length_2684	12.771	3.6748	7.28093	0	0	3287.38
[UP]	scaffold_000033F_transcript_id_21061seq_length_1942	19.983	4.3207	7.03723	0	0	3261.63
[UP]	scaffold_000040F_transcript_id_18907seq_length_6054	2.02168	1.01556	5.39587	3.2094e-29	1.75755e-28	125.915
[UP]	scaffold_000004F_transcript_id_23927seq_length_3610	6.01654	2.58893	6.51694	2.3664e-285	6.36136e-284	1303.13
[UP]	scaffold_000541F_transcript_id_3367seq_length_1876	2.17625	1.12184	7.4146	4.97605e-65	4.79758e-64	289.998
[UP]	scaffold_000110F_transcript_id_8638seq_length_930	3.09772	1.63121	3.06624	1.76386e-14	6.17967e-14	58.7793
[UP]	scaffold_000140F_transcript_id_6895seq_length_1966	62.4629	5.96493	1.71478	3.31787e-23	1.55459e-22	98.4592
[UP]	scaffold_000008F_transcript_id_24184seq_length_4686	2.03481	1.02489	10.0425	2.74208e-278	7.23549e-277	1270.62
[UP]	scaffold_000000F_transcript_id_26294seq_length_1297	6.58577	2.71935	-0.640665	0.0129245	0.0198672	6.17941
[UP]	scaffold_000194F_transcript_id_6372seq_length_2237	23.387	4.54764	7.31337	0	0	4063.47
[UP]	scaffold_000105F_transcript_id_17256seq_length_2817	4.46169	2.15759	5.47619	8.05945e-110	1.1398e-108	495.733
[UP]	scaffold_000038F_transcript_id_7728seq_length_1855	4.33417	2.11576	4.38548	2.19599e-51	1.79163e-50	227.403
[UP]	scaffold_000286F_transcript_id_4393seq_length_1301	2.12695	1.08879	0.886577	0.0182154	0.027224	5.57531
[UP]	scaffold_000081F_transcript_id_16355seq_length_1272	30.8923	4.94918	5.80864	0	0	1590.7
[UP]	scaffold_000000F_transcript_id_26495seq_length_2313	19.6585	4.29708	9.88285	0	0	9270.21
[UP]	scaffold_000019F_transcript_id_23136seq_length_1024	19.6215	4.29437	1.02674	6.50722e-12	2.02886e-11	47.1705
[UP]	scaffold_000035F_transcript_id_20102seq_length_3711	9.07747	3.18229	4.53847	1.32372e-98	1.73051e-97	444.193
[UP]	scaffold_001089F_transcript_id_3230seq_length_2432	4.74366	2.246	1.55726	1.05514e-08	2.78492e-08	32.7369
[UP]	scaffold_000064F_transcript_id_18626seq_length_2585	2.04518	1.03223	7.00163	5.40126e-84	6.4017e-83	377.072
[UP]	scaffold_000135F_transcript_id_13669seq_length_2974	22.3588	4.48277	6.58299	0	0	2491.58
[UP]	scaffold_000062F_transcript_id_20006seq_length_1919	2.96746	1.56923	3.19664	8.07059e-15	2.87269e-14	60.318
[UP]	scaffold_000096F_transcript_id_10924seq_length_2601	4.23294	2.08166	3.23759	2.30119e-23	1.08227e-22	99.1838
[UP]	scaffold_000023F_transcript_id_21303seq_length_2640	5.4568	2.44806	5.96761	1.64948e-183	3.28161e-182	834.564
[UP]	scaffold_000020F_transcript_id_23703seq_length_1047	26.7757	4.74285	7.99193	0	0	6451.15
[UP]	scaffold_000017F_transcript_id_23265seq_length_1595	2.06404	1.04547	3.31076	2.18959e-08	5.65852e-08	31.3187
[UP]	scaffold_000109F_transcript_id_5610seq_length_1919	24.595	4.62029	6.70113	0	0	2756.7
[UP]	scaffold_000152F_transcript_id_11003seq_length_1982	3.50472	1.8093	4.60489	1.16902e-46	8.9071e-46	205.738
[UP]	scaffold_000094F_transcript_id_18535seq_length_3713	2.59241	1.37429	7.7522	3.12636e-225	7.09231e-224	1026.5
[UP]	scaffold_000542F_transcript_id_6847seq_length_2199	3.92192	1.97156	6.56436	7.76502e-196	1.60536e-194	891.268
[UP]	scaffold_000088F_transcript_id_14888seq_length_900	17.1552	4.10057	3.42659	1.2159e-59	1.0954e-58	265.274
[UP]	scaffold_000032F_transcript_id_16781seq_length_2063	19.7318	4.30245	10.0353	4.4031e-221	9.85488e-220	1007.41
[UP]	scaffold_000033F_transcript_id_21570seq_length_3234	15.598	3.96329	5.36561	6.54325e-217	1.44196e-215	988.216
[UP]	scaffold_000199F_transcript_id_10487seq_length_2160	23.8462	4.57568	9.96187	1.66534e-58	1.48562e-57	260.06
[UP]	scaffold_000332F_transcript_id_3434seq_length_2021	6.16315	2.62367	6.79195	0	0	1590.65
[UP]	scaffold_000238F_transcript_id_7454seq_length_1336	10.3122	3.36629	5.14811	8.3658e-159	1.53634e-157	720.939
[UP]	scaffold_000866F_transcript_id_3955seq_length_2393	9.91774	3.31001	1.02674	1.55721e-09	4.31331e-09	36.4614
[UP]	scaffold_000112F_transcript_id_17057seq_length_1676	2.27144	1.1836	7.74999	9.4738e-172	1.80941e-170	780.478
[UP]	scaffold_000000F_transcript_id_26666seq_length_2440	4.60812	2.20418	0.481319	0.000240445	0.000456532	13.4853
[UP]	scaffold_000156F_transcript_id_9363seq_length_4681	2.41596	1.27259	6.29538	3.93853e-78	4.36854e-77	350.146
[UP]	scaffold_000088F_transcript_id_13135seq_length_739	2.80383	1.4874	4.40363	1.1318e-29	6.27338e-29	127.984
[UP]	scaffold_000828F_transcript_id_4098seq_length_956	4.12401	2.04405	2.31624	1.76784e-12	5.67419e-12	49.726
[UP]	scaffold_000157F_transcript_id_13092seq_length_1948	26.9418	4.75177	6.15627	0	0	1956.46
[UP]	scaffold_000052F_transcript_id_17376seq_length_1374	2.50635	1.32559	9.09473	2.64128e-95	3.37377e-94	429.031
[UP]	scaffold_000013F_transcript_id_23683seq_length_2331	2.21281	1.14588	6.2653	1.62736e-63	1.54084e-62	283.048
[UP]	scaffold_000000F_transcript_id_26167seq_length_2524	5.14404	2.3629	7.80837	0	0	2618.41
[UP]	scaffold_000216F_transcript_id_6961seq_length_4726	14.3005	3.83799	0.664179	1.68608e-08	4.38896e-08	31.8261
[UP]	scaffold_000000F_transcript_id_26557seq_length_2819	10.0903	3.3349	2.73942	1.35711e-30	7.66202e-30	132.194
[UP]	scaffold_000048F_transcript_id_15717seq_length_1147	2.12032	1.08428	4.4982	1.78188e-18	7.23942e-18	76.9182
[UP]	scaffold_000474F_transcript_id_6871seq_length_1701	9.56938	3.25843	3.06622	3.01303e-37	1.96435e-36	162.63
[UP]	scaffold_000045F_transcript_id_19138seq_length_1218	8.71017	3.1227	5.26876	4.24078e-158	7.75955e-157	717.697
[UP]	scaffold_000375F_transcript_id_5196seq_length_2763	2.00102	1.00074	5.08234	2.65322e-23	1.2455e-22	98.9019
[UP]	scaffold_000216F_transcript_id_6772seq_length_1608	28.9366	4.85483	0.763712	9.20612e-11	2.71419e-10	41.9832
[UP]	scaffold_000920F_transcript_id_1691seq_length_2208	5.24653	2.39136	9.32177	0	0	3597.28
[UP]	scaffold_000232F_transcript_id_5010seq_length_2628	14.143	3.82202	1.44178	1.9472e-14	6.80774e-14	58.5847
[UP]	scaffold_000238F_transcript_id_7469seq_length_1976	2.43231	1.28233	1.66418	0.000203305	0.000389556	13.8003
[UP]	scaffold_000354F_transcript_id_13594seq_length_1597	2.14874	1.10349	4.09518	9.09116e-15	3.22566e-14	60.0836
[UP]	scaffold_000439F_transcript_id_6633seq_length_1981	2.41514	1.27211	6.54482	3.98241e-34	2.4528e-33	148.348
[UP]	scaffold_000347F_transcript_id_7734seq_length_2345	2.33209	1.22162	3.30525	1.18445e-08	3.11309e-08	32.5122
[UP]	scaffold_000008F_transcript_id_24569seq_length_1434	17.6942	4.14521	7.79179	0	0	5106.05
[UP]	scaffold_000455F_transcript_id_11979seq_length_901	19.5716	4.29069	5.27013	8.59836e-218	1.89902e-216	992.27
[UP]	scaffold_000557F_transcript_id_4017seq_length_1782	7.53776	2.91414	7.56315	0	0	3006.54
[UP]	scaffold_000048F_transcript_id_15741seq_length_869	2.26082	1.17684	4.22308	7.83362e-18	3.10711e-17	73.9945
[UP]	scaffold_000129F_transcript_id_18345seq_length_1698	10.8118	3.43454	2.1422	4.948e-21	2.17032e-20	88.5534
[UP]	scaffold_000050F_transcript_id_20245seq_length_1917	9.29779	3.21689	1.44178	2.97382e-12	9.46017e-12	48.7058
[UP]	scaffold_000001F_transcript_id_25721seq_length_2697	2.74949	1.45917	0.795429	0.00296957	0.00497924	8.82607
[UP]	scaffold_000764F_transcript_id_743seq_length_3544	25.015	4.64472	3.73527	3.27771e-81	3.782e-80	364.29
[UP]	scaffold_000001F_transcript_id_25452seq_length_2445	5.84949	2.54831	8.04915	0	0	3390.74
[UP]	scaffold_000362F_transcript_id_9806seq_length_1625	8.18226	3.0325	-0.480201	0.00350622	0.0058226	8.52333
[UP]	scaffold_000005F_transcript_id_23363seq_length_2394	19.5291	4.28755	8.42035	0	0	6966.59
[UP]	scaffold_000093F_transcript_id_19174seq_length_1953	2.09027	1.06369	7.99215	2.36424e-163	4.38193e-162	741.858
[UP]	scaffold_000697F_transcript_id_8545seq_length_2031	6.6751	2.73879	5.95097	7.9094e-212	1.70554e-210	964.834
[UP]	scaffold_000158F_transcript_id_8710seq_length_6351	3.44069	1.7827	1.22606	2.78871e-05	5.75951e-05	17.5567
[UP]	scaffold_000255F_transcript_id_1932seq_length_726	3.44952	1.78639	8.15292	0	0	2072.46
[UP]	scaffold_000152F_transcript_id_11181seq_length_1212	2.90499	1.53853	7.20107	6.22314e-195	1.2813e-193	887.11
[UP]	scaffold_000025F_transcript_id_20323seq_length_1357	5.64649	2.49735	7.57353	0	0	2451.44
[UP]	scaffold_000354F_transcript_id_13431seq_length_2753	4.98816	2.31851	0.557269	8.15762e-05	0.000162262	15.5214
[UP]	scaffold_000033F_transcript_id_21076seq_length_2096	16.6136	4.05429	4.9581	5.93588e-168	1.12089e-166	763.015
[UP]	scaffold_000008F_transcript_id_U5ERS9.1seq_length_294	3.35882	1.74795	4.34054	4.70656e-37	3.05454e-36	161.744
[UP]	scaffold_000265F_transcript_id_14233seq_length_1181	3.99661	1.99878	5.22295	1.90817e-82	2.23519e-81	369.961
[UP]	scaffold_000007F_transcript_id_24985seq_length_3770	2.08436	1.0596	7.359	1.22445e-70	1.24772e-69	315.744
[UP]	scaffold_000018F_transcript_id_24466seq_length_2106	2.95207	1.56173	1.07922	0.000410123	0.000760551	12.4855
[UP]	scaffold_000006F_transcript_id_26131seq_length_1870	2.24506	1.16676	7.01472	4.04845e-31	2.32363e-30	134.595
[UP]	scaffold_000210F_transcript_id_12960seq_length_626	17.8479	4.15768	0.915715	9.05625e-11	2.67237e-10	42.0153
[UP]	scaffold_000177F_transcript_id_663seq_length_2679	2.49241	1.31754	6.29607	5.85844e-66	5.73658e-65	294.263
[UP]	scaffold_000050F_transcript_id_19710seq_length_2249	2.81427	1.49276	8.83014	0	0	1893.88
[UP]	scaffold_000421F_transcript_id_559seq_length_2096	2.91308	1.54254	0.271869	0.0124457	0.0192108	6.24624
[UP]	scaffold_000109F_transcript_id_5477seq_length_1743	3.30419	1.7243	3.31074	1.85026e-18	7.51116e-18	76.8438
[UP]	scaffold_000071F_transcript_id_8334seq_length_2651	5.32602	2.41306	3.44172	5.15975e-33	3.10048e-32	143.259
[UP]	scaffold_000097F_transcript_id_12044seq_length_3723	64.922	6.02064	-0.14317	2.54072e-06	5.76898e-06	22.1355
[UP]	scaffold_000497F_transcript_id_2868seq_length_3579	2.49932	1.32153	1.74759	8.17126e-05	0.000162437	15.5182
[UP]	scaffold_000345F_transcript_id_8792seq_length_2735	31.9327	4.99696	4.9298	5.62121e-193	1.15028e-191	878.113
[UP]	scaffold_000117F_transcript_id_15324seq_length_1382	5.02548	2.32926	7.453	0	0	2051.24
[UP]	scaffold_000099F_transcript_id_14548seq_length_550	2.25413	1.17257	6.98966	3.15925e-105	4.33349e-104	474.624
[UP]	scaffold_000377F_transcript_id_2366seq_length_2138	2.32774	1.21893	0.763722	0.012648	0.019499	6.21769
[UP]	scaffold_000089F_transcript_id_15623seq_length_1688	23.6435	4.56337	6.63317	0	0	2611.2
[UP]	scaffold_000009F_transcript_id_26705seq_length_1440	5.30471	2.40727	5.84044	1.2817e-164	2.38878e-163	747.68
[UP]	scaffold_000528F_transcript_id_1233seq_length_2456	16.9011	4.07904	3.5801	5.9983e-66	5.8678e-65	294.216
[UP]	scaffold_000136F_transcript_id_16474seq_length_2194	3.87128	1.95281	7.88225	1.49992e-285	4.04294e-284	1304.04
[UP]	scaffold_000097F_transcript_id_10886seq_length_3219	4.661	2.22064	3.99627	1.54017e-42	1.09604e-41	186.861
[UP]	scaffold_000087F_transcript_id_10113seq_length_1150	23.2678	4.54026	7.37167	0	0	4213.73
[UP]	scaffold_000019F_transcript_id_21741seq_length_1130	8.06298	3.01131	3.26615	5.53648e-39	3.71333e-38	170.577
[UP]	scaffold_000037F_transcript_id_19691seq_length_1601	8.43548	3.07647	3.51495	2.54852e-47	1.96268e-46	208.77
[UP]	scaffold_000028F_transcript_id_20187seq_length_2644	21.9705	4.4575	8.78895	0	0	1985.63
[UP]	scaffold_000010F_transcript_id_21908seq_length_1580	30.853	4.94734	12.8003	0	0	7026.93
[UP]	scaffold_000002F_transcript_id_25232seq_length_1210	32.618	5.0276	8.4974	0	0	6332.87
[UP]	scaffold_000687F_transcript_id_4332seq_length_1449	2.9847	1.57759	3.27182	1.11877e-15	4.10914e-15	64.2093
[UP]	scaffold_000050F_transcript_id_20223seq_length_2242	19.7926	4.30689	3.79138	1.01e-79	1.15082e-78	357.452
[UP]	scaffold_000033F_transcript_id_21023seq_length_1841	3.63224	1.86086	4.02332	3.68616e-33	2.22122e-32	143.927
[UP]	scaffold_000238F_transcript_id_7464seq_length_1313	19.723	4.30181	1.50067	1.521e-16	5.77475e-16	68.1425
[UP]	scaffold_000037F_transcript_id_19345seq_length_2034	2.18386	1.12688	5.77652	6.04716e-45	4.4782e-44	197.884
[UP]	scaffold_000002F_transcript_id_24676seq_length_1906	17.218	4.10584	3.75958	5.54643e-75	5.92269e-74	335.688
[UP]	scaffold_000623F_transcript_id_4310seq_length_1335	11.6725	3.54504	3.8378	6.9903e-69	7.01619e-68	307.681
[UP]	scaffold_000196F_transcript_id_7336seq_length_2369	19.9026	4.31489	3.6249	3.06122e-71	3.14175e-70	318.508
[UP]	scaffold_000040F_transcript_id_18236seq_length_1470	3.07995	1.6229	5.32017	9.02261e-63	8.44722e-62	279.634
[UP]	scaffold_000025F_transcript_id_20387seq_length_2023	11.0157	3.46149	10.7356	0	0	7406.64
[UP]	scaffold_000673F_transcript_id_1752seq_length_508	17.286	4.11153	3.43668	3.42939e-60	3.10347e-59	267.796
[UP]	scaffold_000022F_transcript_id_20806seq_length_4039	2.11484	1.08055	3.97572	3.07829e-13	1.02138e-12	53.1576
[UP]	scaffold_000028F_transcript_id_20179seq_length_2282	3.16786	1.66351	6.90718	8.2458e-185	1.65031e-183	840.549
[UP]	scaffold_000009F_transcript_id_27102seq_length_1285	2.68839	1.42674	7.70316	1.36592e-233	3.20752e-232	1064.96
[UP]	scaffold_000104F_transcript_id_5417seq_length_1499	6.91488	2.7897	7.01777	0	0	2002.65
[UP]	scaffold_000007F_transcript_id_24803seq_length_1669	9.06699	3.18062	7.90263	0	0	4147.41
[UP]	scaffold_000338F_transcript_id_3754seq_length_1766	18.5225	4.21121	11.5607	0	0	10162.1
[UP]	scaffold_000097F_transcript_id_11846seq_length_2275	3.85246	1.94578	4.49332	1.39157e-48	1.09437e-47	214.558
[UP]	scaffold_000129F_transcript_id_17347seq_length_2485	19.7213	4.30168	4.5361	1.73481e-132	2.82844e-131	599.929
[UP]	scaffold_000265F_transcript_id_14289seq_length_3156	3.89975	1.96338	0.856827	8.94583e-05	0.000177342	15.3471
[UP]	scaffold_000080F_transcript_id_10064seq_length_1558	4.22489	2.07891	8.2692	0	0	2249.3
[UP]	scaffold_000581F_transcript_id_3498seq_length_2837	2.15039	1.1046	0.698133	0.0266945	0.0388316	4.91046
[UP]	scaffold_000143F_transcript_id_15024seq_length_1996	2.25458	1.17286	3.11733	6.06062e-09	1.62226e-08	33.8151
[UP]	scaffold_000176F_transcript_id_12110seq_length_1215	32.3234	5.01451	10.3059	0	0	10802.3
[UP]	scaffold_000049F_transcript_id_12686seq_length_3578	2.68291	1.4238	2.55725	1.41266e-08	3.69451e-08	32.1698
[UP]	scaffold_000035F_transcript_id_20868seq_length_1552	26.1802	4.71041	7.15295	0	0	3759.48
[UP]	scaffold_000092F_transcript_id_12964seq_length_1305	4.03848	2.01381	3.71058	2.02649e-30	1.13899e-29	131.398
[UP]	scaffold_000022F_transcript_id_21626seq_length_1814	28.9366	4.85483	0.763712	9.20612e-11	2.71419e-10	41.9832
[UP]	scaffold_000092F_transcript_id_13280seq_length_1332	34.6718	5.11569	7.81003	0	0	6055.58
[UP]	scaffold_000079F_transcript_id_14958seq_length_2500	15.028	3.90958	3.84539	3.86555e-76	4.19026e-75	340.999
[UP]	scaffold_000326F_transcript_id_5139seq_length_1164	30.3295	4.92265	6.40377	0	0	2365.34
[UP]	scaffold_000008F_transcript_id_24570seq_length_1799	2.10936	1.07681	5.99192	1.29874e-47	1.0056e-46	210.112
[UP]	scaffold_000327F_transcript_id_4386seq_length_2723	28.5227	4.83404	10.0148	0	0	11957.7
[UP]	scaffold_000183F_transcript_id_12336seq_length_1696	2.36955	1.24461	3.63377	1.70241e-13	5.70142e-13	54.3214
[UP]	scaffold_000186F_transcript_id_10270seq_length_4384	2.04333	1.03093	7.38104	2.78237e-19	1.16197e-18	80.5866
[UP]	scaffold_000032F_transcript_id_17343seq_length_2970	2.73246	1.4502	6.38921	1.68968e-104	2.29572e-103	471.277
[UP]	scaffold_000566F_transcript_id_32seq_length_1396	32.033	5.00149	10.3564	0	0	6886.53

## Sheet: Dataset S1B
Dataset S1B: RNASeq analysis. B. Interproscan annotation of transcripts with enriched expression in the SSA1-SG1 gut
	Tags	SeqName	Description	Length	#Hits	e-Value	sim mean	#GO	GO IDs	GO Names	Enzyme Codes	Enzyme Names	InterPro IDs	InterPro GO IDs	InterPro GO Names
TRUE	[INTERPRO, BLASTED, MAPPED]	scaffold_000040F_transcript_id_19742seq_length_2283	short-chain dehydrogenase/reductase family 16C member 6-like	2283	20	0	62.1	4	C:GO:0016020; C:GO:0016021; F:GO:0016491; P:GO:0055114	C:membrane; C:integral component of membrane; F:oxidoreductase activity; P:oxidation-reduction process			IPR002347 (PRINTS); IPR002347 (PRINTS); IPR002347 (PFAM); G3DSA:3.40.50.720 (GENE3D); PTHR24322 (PANTHER); IPR020904 (PROSITE_PATTERNS); TRANSMEMBRANE (PHOBIUS); NON_CYTOPLASMIC_DOMAIN (PHOBIUS); CYTOPLASMIC_DOMAIN (PHOBIUS); IPR036291 (SUPERFAMILY); TMhelix (TMHMM)	F:GO:0016491	F:oxidoreductase activity
TRUE	[INTERPRO, BLASTED]	scaffold_000107F_transcript_id_2872seq_length_2255	phosphatase and actin regulator 2 isoform X2	2255	20	0	84.35						Coil (COILS); IPR004018 (SMART); IPR004018 (PFAM); mobidb-lite (MOBIDB_LITE); mobidb-lite (MOBIDB_LITE); PTHR12751 (PANTHER); IPR004018 (PROSITE_PROFILES); IPR004018 (PROSITE_PROFILES); PS51257 (PROSITE_PROFILES); IPR004018 (PROSITE_PROFILES)	no GO terms	no GO terms
TRUE	[INTERPRO, BLASTED, MAPPED]	scaffold_000253F_transcript_id_4230seq_length_864	cytoplasmic FMR1-interacting protein	864	20	8.09619e-64	80.59	1	C:GO:0005737	C:cytoplasm			IPR008081 (PRINTS); IPR008081 (PANTHER); PTHR12195:SF1 (PANTHER)	no GO terms	no GO terms
TRUE	[INTERPRO, BLASTED, MAPPED, GO-SLIM]	scaffold_000764F_transcript_id_743seq_length_3544	DNA/RNA non-specific endonuclease	3544	20	0	60.46	2	F:GO:0004518; F:GO:0043167	F:nuclease activity; F:ion binding			IPR001604 (SMART); IPR001604 (PFAM); G3DSA:3.40.570.10 (GENE3D); mobidb-lite (MOBIDB_LITE); mobidb-lite (MOBIDB_LITE); PTHR13966:SF11 (PANTHER); PTHR13966 (PANTHER); SIGNAL_PEPTIDE_C_REGION (PHOBIUS); NON_CYTOPLASMIC_DOMAIN (PHOBIUS); SIGNAL_PEPTIDE_N_REGION (PHOBIUS); SIGNAL_PEPTIDE_H_REGION (PHOBIUS); SIGNAL_PEPTIDE (PHOBIUS); SignalP-noTM (SIGNALP_EUK); SSF54060 (SUPERFAMILY)	F:GO:0003676; F:GO:0016787; F:GO:0046872	F:nucleic acid binding; F:hydrolase activity; F:metal ion binding
TRUE	[INTERPRO, BLASTED]	scaffold_000005F_transcript_id_23832seq_length_7873	tetratricopeptide repeat protein	7873	20	0	62.64						IPR002110 (PRINTS); IPR002110 (SMART); IPR020683 (PFAM); IPR036770 (G3DSA:1.25.40.GENE3D); IPR036770 (G3DSA:1.25.40.GENE3D); IPR011990 (G3DSA:1.25.40.GENE3D); IPR036770 (G3DSA:1.25.40.GENE3D); IPR036770 (G3DSA:1.25.40.GENE3D); PF13424 (PFAM); IPR036770 (G3DSA:1.25.40.GENE3D); IPR036770 (G3DSA:1.25.40.GENE3D); IPR036770 (G3DSA:1.25.40.GENE3D); PTHR43928 (PANTHER); IPR002110 (PROSITE_PROFILES); IPR…	F:GO:0005515	F:protein binding
TRUE	[INTERPRO, BLASTED, MAPPED]	scaffold_000097F_transcript_id_12127seq_length_2356	venom serine carboxypeptidase-like	2356	20	0	61.24	5	F:GO:0004180; F:GO:0004185; P:GO:0006508; F:GO:0008233; F:GO:0016787	F:carboxypeptidase activity; F:serine-type carboxypeptidase activity; P:proteolysis; F:peptidase activity; F:hydrolase activity			IPR001563 (PRINTS); IPR029058 (G3DSA:3.40.50.GENE3D); IPR001563 (PFAM); PTHR11802:SF98 (PANTHER); IPR001563 (PANTHER); SIGNAL_PEPTIDE_N_REGION (PHOBIUS); NON_CYTOPLASMIC_DOMAIN (PHOBIUS); SIGNAL_PEPTIDE_C_REGION (PHOBIUS); SIGNAL_PEPTIDE (PHOBIUS); SIGNAL_PEPTIDE_H_REGION (PHOBIUS); IPR029058 (SUPERFAMILY)	F:GO:0004185; P:GO:0006508	F:serine-type carboxypeptidase activity; P:proteolysis
TRUE	[INTERPRO, BLASTED, MAPPED, GO-SLIM]	scaffold_000012F_transcript_id_22165seq_length_1948	corticotropin-releasing factor-binding protein	1948	20	0	77.88	1	F:GO:0003674	F:molecular_function			IPR035914 (G3DSA:2.60.120.GENE3D); IPR008435 (PFAM); IPR008435 (PANTHER); SIGNAL_PEPTIDE_C_REGION (PHOBIUS); SIGNAL_PEPTIDE_N_REGION (PHOBIUS); SIGNAL_PEPTIDE_H_REGION (PHOBIUS); SIGNAL_PEPTIDE (PHOBIUS); NON_CYTOPLASMIC_DOMAIN (PHOBIUS); SignalP-TM (SIGNALP_GRAM_POSITIVE); SignalP-noTM (SIGNALP_EUK); IPR035914 (SUPERFAMILY)	F:GO:0051424	F:corticotropin-releasing hormone binding
TRUE	[INTERPRO, BLASTED, MAPPED, GO-SLIM]	scaffold_000033F_transcript_id_T1E8G0.1seq_length_576	UMP-CMP kinase	576	20	6.29974e-135	84.85	7	C:GO:0005634; C:GO:0005737; P:GO:0009058; F:GO:0016301; P:GO:0034641; F:GO:0043167; P:GO:0044281	C:nucleus; C:cytoplasm; P:biosynthetic process; F:kinase activity; P:cellular nitrogen compound metabolic process; F:ion binding; P:small molecule metabolic process	EC:2.7.4.4; EC:2.7.4.14	Nucleoside-phosphate kinase; UMP/CMP kinase	IPR000850 (PRINTS); PF00406 (PFAM); G3DSA:3.40.50.300 (GENE3D); IPR006266 (TIGRFAM); PTHR23359:SF114 (PANTHER); IPR000850 (PANTHER); IPR033690 (PROSITE_PATTERNS); IPR006266 (HAMAP); IPR000850 (HAMAP); IPR000850 (CDD); IPR027417 (SUPERFAMILY)	F:GO:0004127; F:GO:0005524; P:GO:0006139; P:GO:0006207; P:GO:0006221; F:GO:0009041; F:GO:0019205	F:cytidylate kinase activity; F:ATP binding; P:nucleobase-containing compound metabolic process; P:'de novo' pyrimidine nucleobase biosynthetic process; P:pyrimidine nucleotide biosynthetic process; F:uridylate kinase activity; F:nucleobase-containing compound kinase activity
TRUE	[INTERPRO, BLASTED, MAPPED, GO-SLIM]	scaffold_000049F_transcript_id_14120seq_length_2822	dihydrolipoyllysine-residue succinyltransferase component of 2-oxoglutarate dehydrogenase complex, mitochondrial	2822	20	0	79.73	9	C:GO:0005737; P:GO:0005975; P:GO:0006091; P:GO:0006520; P:GO:0009058; F:GO:0016746; C:GO:0032991; P:GO:0034655; P:GO:0051186	C:cytoplasm; P:carbohydrate metabolic process; P:generation of precursor metabolites and energy; P:cellular amino acid metabolic process; P:biosynthetic process; F:transferase activity, transferring acyl groups; C:protein-containing complex; P:nucleobase-containing compound catabolic process; P:cofactor metabolic process	EC:2.3.1.61; EC:2.3.1.38; EC:2.3.1.12	Dihydrolipoyllysine-residue succinyltransferase; [Acyl-carrier-protein] S-acetyltransferase; Dihydrolipoyllysine-residue acetyltransferase	IPR000089 (PFAM); G3DSA:3.30.420.470 (GENE3D); G3DSA:2.40.50.100 (GENE3D); mobidb-lite (MOBIDB_LITE); mobidb-lite (MOBIDB_LITE); PTHR43416:SF5 (PANTHER); PTHR43416 (PANTHER); IPR003016 (PROSITE_PATTERNS); IPR000089 (PROSITE_PROFILES); cd06849 (CDD); IPR011053 (SUPERFAMILY); SSF101447 (SUPERFAMILY)	no GO terms	no GO terms
TRUE	[INTERPRO, BLASTED, MAPPED, GO-SLIM]	scaffold_000132F_transcript_id_17161seq_length_1192	aspartate aminotransferase	1192	20	1.71838e-87	71.05	2	F:GO:0003674; P:GO:0008150	F:molecular_function; P:biological_process			IPR000796 (PRINTS); IPR015422 (G3DSA:3.90.1150.GENE3D); IPR015421 (G3DSA:3.40.640.GENE3D); IPR004839 (PFAM); PTHR11879:SF22 (PANTHER); IPR000796 (PANTHER); IPR004838 (PROSITE_PATTERNS); SIGNAL_PEPTIDE_C_REGION (PHOBIUS); SIGNAL_PEPTIDE_H_REGION (PHOBIUS); SIGNAL_PEPTIDE_N_REGION (PHOBIUS); SIGNAL_PEPTIDE (PHOBIUS); NON_CYTOPLASMIC_DOMAIN (PHOBIUS); IPR015424 (SUPERFAMILY)	F:GO:0003824; P:GO:0006520; F:GO:0008483; P:GO:0009058; F:GO:0030170	F:catalytic activity; P:cellular amino acid metabolic process; F:transaminase activity; P:biosynthetic process; F:pyridoxal phosphate binding
TRUE	[INTERPRO, BLASTED, MAPPED, GO-SLIM]	scaffold_000501F_transcript_id_6836seq_length_1786	acetyl-CoA acetyltransferase, cytosolic	1786	20	0	81.46	6	P:GO:0006520; P:GO:0006629; P:GO:0009056; P:GO:0009058; F:GO:0016746; P:GO:0034641	P:cellular amino acid metabolic process; P:lipid metabolic process; P:catabolic process; P:biosynthetic process; F:transferase activity, transferring acyl groups; P:cellular nitrogen compound metabolic process	EC:2.3.1.16; EC:2.3.1.9	Acetyl-CoA C-acyltransferase; Acetyl-CoA C-acetyltransferase	IPR020617 (PFAM); IPR016039 (G3DSA:3.40.47.GENE3D); IPR002155 (PIRSF); IPR002155 (TIGRFAM); IPR020616 (PFAM); IPR016039 (G3DSA:3.40.47.GENE3D); PTHR18919 (PANTHER); PTHR18919:SF101 (PANTHER); IPR020610 (PROSITE_PATTERNS); IPR020615 (PROSITE_PATTERNS); IPR020613 (PROSITE_PATTERNS); IPR002155 (CDD); IPR016039 (SUPERFAMILY); IPR016039 (SUPERFAMILY)	F:GO:0003824; P:GO:0008152; F:GO:0016747	F:catalytic activity; P:metabolic process; F:transferase activity, transferring acyl groups other than amino-acyl groups
TRUE	[INTERPRO, BLASTED, MAPPED, GO-SLIM]	scaffold_000100F_transcript_id_15080seq_length_1871	xaa-Pro dipeptidase	1871	20	0	77.79	1	F:GO:0043167	F:ion binding			IPR007865 (SMART); G3DSA:3.90.230.10 (GENE3D); IPR029149 (G3DSA:3.40.350.GENE3D); IPR007865 (PFAM); IPR000994 (PFAM); PTHR43226:SF1 (PANTHER); PTHR43226 (PANTHER); IPR001131 (PROSITE_PATTERNS); cd01087 (CDD); IPR036005 (SUPERFAMILY); IPR029149 (SUPERFAMILY)	F:GO:0004177; F:GO:0030145	F:aminopeptidase activity; F:manganese ion binding
TRUE	[INTERPRO, BLASTED, MAPPED, GO-SLIM]	scaffold_000710F_transcript_id_6465seq_length_2016	UPF0454 protein C12orf49 homolog	2016	20	5.65844e-129	75.78	1	C:GO:0005575	C:cellular_component			IPR019352 (PFAM); IPR019352 (PANTHER); NON_CYTOPLASMIC_DOMAIN (PHOBIUS); TRANSMEMBRANE (PHOBIUS); CYTOPLASMIC_DOMAIN (PHOBIUS); TMhelix (TMHMM)	no GO terms	no GO terms
TRUE	[INTERPRO, BLASTED, MAPPED]	scaffold_000025F_transcript_id_20216seq_length_2496	maltase A3-like	2496	20	0	69.84	2	F:GO:0003824; P:GO:0005975	F:catalytic activity; P:carbohydrate metabolic process			IPR006047 (SMART); G3DSA:3.90.400.10 (GENE3D); G3DSA:3.20.20.80 (GENE3D); IPR013780 (G3DSA:2.60.40.GENE3D); IPR006047 (PFAM); PTHR10357 (PANTHER); PTHR10357:SF177 (PANTHER); IPR017853 (SUPERFAMILY)	F:GO:0003824; P:GO:0005975	F:catalytic activity; P:carbohydrate metabolic process
TRUE	[INTERPRO, BLASTED]	scaffold_000057F_transcript_id_16370seq_length_968	prothoracicostatic peptide	968	20	8.29065e-63	66.97						mobidb-lite (MOBIDB_LITE); mobidb-lite (MOBIDB_LITE); SIGNAL_PEPTIDE_C_REGION (PHOBIUS); SIGNAL_PEPTIDE_N_REGION (PHOBIUS); SIGNAL_PEPTIDE_H_REGION (PHOBIUS); NON_CYTOPLASMIC_DOMAIN (PHOBIUS); SIGNAL_PEPTIDE (PHOBIUS); SignalP-noTM (SIGNALP_EUK); TMhelix (TMHMM)	no GO terms	no GO terms
TRUE	[INTERPRO, BLASTED, MAPPED, GO-SLIM]	scaffold_000166F_transcript_id_2057seq_length_1732	cGMP-dependent protein kinase, isozyme 2 forms cD4/T1/T3A/T3B isoform X1	1732	20	7.02289e-120	65.03	1	F:GO:0016301	F:kinase activity			Coil (COILS); IPR014710 (G3DSA:2.60.120.GENE3D); PTHR24353 (PANTHER); PTHR24353:SF68 (PANTHER); IPR000595 (PROSITE_PROFILES); IPR000595 (CDD); IPR018490 (SUPERFAMILY)	no GO terms	no GO terms
TRUE	[INTERPRO, BLASTED, MAPPED, GO-SLIM]	scaffold_000083F_transcript_id_15558seq_length_5545	protein mesh isoform X2	5545	20	0	86.55	2	C:GO:0005575; P:GO:0007155	C:cellular_component; P:cell adhesion			IPR003886 (SMART); IPR005533 (SMART); IPR000436 (SMART); IPR001846 (SMART); IPR001846 (PFAM); IPR005533 (PFAM); G3DSA:2.10.70.10 (GENE3D); IPR013783 (G3DSA:2.60.40.GENE3D); IPR003886 (PFAM); IPR000436 (PFAM); mobidb-lite (MOBIDB_LITE); mobidb-lite (MOBIDB_LITE); PTHR13802 (PANTHER); CYTOPLASMIC_DOMAIN (PHOBIUS); CYTOPLASMIC_DOMAIN (PHOBIUS); TRANSMEMBRANE (PHOBIUS); NON_CYTOPLASMIC_DOMAIN (PHOBIU…	P:GO:0007160	P:cell-matrix adhesion
TRUE	[INTERPRO, BLASTED, MAPPED, GO-SLIM]	scaffold_000391F_transcript_id_2909seq_length_2165	beta-3 adrenergic receptor-like	2165	20	0	58.63	2	C:GO:0005575; P:GO:0007165	C:cellular_component; P:signal transduction			IPR000276 (PRINTS); IPR000276 (SMART); IPR000276 (PFAM); G3DSA:1.20.1070.10 (GENE3D); mobidb-lite (MOBIDB_LITE); mobidb-lite (MOBIDB_LITE); PTHR43893 (PANTHER); IPR000276 (PROSITE_PATTERNS); NON_CYTOPLASMIC_DOMAIN (PHOBIUS); CYTOPLASMIC_DOMAIN (PHOBIUS); NON_CYTOPLASMIC_DOMAIN (PHOBIUS); NON_CYTOPLASMIC_DOMAIN (PHOBIUS); CYTOPLASMIC_DOMAIN (PHOBIUS); CYTOPLASMIC_DOMAIN (PHOBIUS); CYTOPLASMIC_DOMA…	F:GO:0004930; P:GO:0007186; C:GO:0016021	F:G-protein coupled receptor activity; P:G-protein coupled receptor signaling pathway; C:integral component of membrane
TRUE	[INTERPRO, BLASTED, MAPPED, GO-SLIM]	scaffold_000096F_transcript_id_10823seq_length_1347	ubiquitin-conjugating enzyme E2 J1-like	1347	20	0	81.7	1	C:GO:0005575	C:cellular_component			SM00212 (SMART); IPR016135 (G3DSA:3.10.110.GENE3D); IPR000608 (PFAM); mobidb-lite (MOBIDB_LITE); mobidb-lite (MOBIDB_LITE); PTHR44235 (PANTHER); TRANSMEMBRANE (PHOBIUS); NON_CYTOPLASMIC_DOMAIN (PHOBIUS); CYTOPLASMIC_DOMAIN (PHOBIUS); IPR000608 (PROSITE_PROFILES); IPR000608 (CDD); IPR016135 (SUPERFAMILY); TMhelix (TMHMM)	no GO terms	no GO terms
TRUE	[INTERPRO, BLASTED]	scaffold_000023F_transcript_id_21246seq_length_1213	UDP-glucuronosyltransferase 2B18-like	1213	20	0	75.27						IPR002213 (PFAM); G3DSA:3.40.50.2000 (GENE3D); G3DSA:3.40.50.2000 (GENE3D); PTHR11926:SF151 (PANTHER); PTHR11926 (PANTHER); SIGNAL_PEPTIDE (PHOBIUS); SIGNAL_PEPTIDE_H_REGION (PHOBIUS); SIGNAL_PEPTIDE_N_REGION (PHOBIUS); SIGNAL_PEPTIDE_C_REGION (PHOBIUS); NON_CYTOPLASMIC_DOMAIN (PHOBIUS); SignalP-TM (SIGNALP_EUK); SignalP-TM (SIGNALP_GRAM_POSITIVE); SSF53756 (SUPERFAMILY); TMhelix (TMHMM)	P:GO:0008152; F:GO:0016758	P:metabolic process; F:transferase activity, transferring hexosyl groups
TRUE	[INTERPRO, BLASTED, MAPPED, GO-SLIM]	scaffold_000111F_transcript_id_8402seq_length_3472	meprin A subunit beta-like	3472	20	0	62.18	1	F:GO:0008233	F:peptidase activity			IPR001506 (PRINTS); IPR000998 (SMART); IPR006026 (SMART); IPR000998 (PFAM); IPR024079 (G3DSA:3.40.390.GENE3D); IPR001506 (PFAM); G3DSA:2.60.120.200 (GENE3D); mobidb-lite (MOBIDB_LITE); PTHR10127 (PANTHER); SIGNAL_PEPTIDE_N_REGION (PHOBIUS); SIGNAL_PEPTIDE_H_REGION (PHOBIUS); SIGNAL_PEPTIDE (PHOBIUS); NON_CYTOPLASMIC_DOMAIN (PHOBIUS); SIGNAL_PEPTIDE_C_REGION (PHOBIUS); IPR000998 (PROSITE_PROFILES)…	F:GO:0004222; P:GO:0006508; F:GO:0008237; F:GO:0008270; C:GO:0016020	F:metalloendopeptidase activity; P:proteolysis; F:metallopeptidase activity; F:zinc ion binding; C:membrane
TRUE	[INTERPRO, BLASTED, MAPPED]	scaffold_000087F_transcript_id_10171seq_length_825	putative serine protease K12H4.7	825	20	1.6137e-69	63.22	2	P:GO:0006508; F:GO:0008236	P:proteolysis; F:serine-type peptidase activity			IPR008758 (PFAM); PTHR11010 (PANTHER); PTHR11010:SF5 (PANTHER)	P:GO:0006508; F:GO:0008236	P:proteolysis; F:serine-type peptidase activity
TRUE	[INTERPRO, BLASTED]	scaffold_000359F_transcript_id_4495seq_length_2293	facilitated trehalose transporter Tret1-like	2293	20	0	72.05						IPR005828 (PFAM); G3DSA:1.20.1250.20 (GENE3D); PTHR23500 (PANTHER); PTHR23500:SF11 (PANTHER); IPR005829 (PROSITE_PATTERNS); CYTOPLASMIC_DOMAIN (PHOBIUS); TRANSMEMBRANE (PHOBIUS); TRANSMEMBRANE (PHOBIUS); NON_CYTOPLASMIC_DOMAIN (PHOBIUS); NON_CYTOPLASMIC_DOMAIN (PHOBIUS); NON_CYTOPLASMIC_DOMAIN (PHOBIUS); TRANSMEMBRANE (PHOBIUS); TRANSMEMBRANE (PHOBIUS); CYTOPLASMIC_DOMAIN (PHOBIUS); CYTOPLASMIC_D…	F:GO:0005215; C:GO:0016021; F:GO:0022857; P:GO:0055085	F:transporter activity; C:integral component of membrane; F:transmembrane transporter activity; P:transmembrane transport
TRUE	[INTERPRO, BLASTED, MAPPED, GO-SLIM]	scaffold_000012F_transcript_id_21926seq_length_1430	chloride intracellular channel exc-4	1430	20	5.27323e-176	87.77	9	C:GO:0005739; P:GO:0006790; F:GO:0008289; F:GO:0016765; F:GO:0022857; P:GO:0034641; P:GO:0040011; F:GO:0043167; P:GO:0051186	C:mitochondrion; P:sulfur compound metabolic process; F:lipid binding; F:transferase activity, transferring alkyl or aryl (other than methyl) groups; F:transmembrane transporter activity; P:cellular nitrogen compound metabolic process; P:locomotion; F:ion binding; P:cofactor metabolic process	EC:2.5.1.18	Glutathione transferase	G3DSA:3.40.30.10 (GENE3D); G3DSA:1.20.1050.10 (GENE3D); PTHR43920 (PANTHER); PTHR43920:SF5 (PANTHER); cd03198 (CDD); cd03061 (CDD); IPR036249 (SUPERFAMILY); IPR036282 (SUPERFAMILY)	no GO terms	no GO terms
TRUE	[INTERPRO, BLASTED, MAPPED]	scaffold_000032F_transcript_id_17634seq_length_1545	nocturnin isoform X5	1545	20	0	82.48	3	F:GO:0004535; P:GO:0007623; P:GO:0090503	F:poly(A)-specific ribonuclease activity; P:circadian rhythm; P:RNA phosphodiester bond hydrolysis, exonucleolytic			IPR005135 (PFAM); IPR036691 (G3DSA:3.60.10.GENE3D); PTHR12121 (PANTHER); PTHR12121:SF45 (PANTHER); IPR036691 (SUPERFAMILY)	no GO terms	no GO terms
TRUE	[INTERPRO, BLASTED]	scaffold_000354F_transcript_id_13760seq_length_1830	ankyrin-1-like isoform X1	1830	20	0	62.46						IPR002110 (PRINTS); IPR002110 (SMART); IPR036770 (G3DSA:1.25.40.GENE3D); PF13637 (PFAM); IPR036770 (G3DSA:1.25.40.GENE3D); IPR036770 (G3DSA:1.25.40.GENE3D); IPR020683 (PFAM); IPR002110 (PFAM); IPR036770 (G3DSA:1.25.40.GENE3D); PTHR44206 (PANTHER); PTHR44206:SF2 (PANTHER); PTHR44206:SF2 (PANTHER); PTHR44206 (PANTHER); IPR002110 (PROSITE_PROFILES); IPR002110 (PROSITE_PROFILES); IPR002110 (PROSITE_P…	F:GO:0005515	F:protein binding
TRUE	[INTERPRO, BLASTED]	scaffold_000552F_transcript_id_88seq_length_1482	BLOC-1-related complex subunit 8 homolog	1482	20	3.82063e-92	85.39						IPR019320 (PFAM); IPR019320 (PANTHER); SIGNAL_PEPTIDE_H_REGION (PHOBIUS); NON_CYTOPLASMIC_DOMAIN (PHOBIUS); SIGNAL_PEPTIDE (PHOBIUS); SIGNAL_PEPTIDE_C_REGION (PHOBIUS); SIGNAL_PEPTIDE_N_REGION (PHOBIUS)	no GO terms	no GO terms
TRUE	[INTERPRO, BLASTED, MAPPED, GO-SLIM]	scaffold_000443F_transcript_id_11017seq_length_3190	major facilitator superfamily domain-containing protein 6-like	3190	20	0	77.11	1	C:GO:0005575	C:cellular_component			G3DSA:1.20.1250.20 (GENE3D); IPR024989 (PFAM); G3DSA:1.20.1250.20 (GENE3D); mobidb-lite (MOBIDB_LITE); PTHR16172 (PANTHER); PTHR16172:SF34 (PANTHER); TRANSMEMBRANE (PHOBIUS); CYTOPLASMIC_DOMAIN (PHOBIUS); TRANSMEMBRANE (PHOBIUS); CYTOPLASMIC_DOMAIN (PHOBIUS); TRANSMEMBRANE (PHOBIUS); CYTOPLASMIC_DOMAIN (PHOBIUS); NON_CYTOPLASMIC_DOMAIN (PHOBIUS); NON_CYTOPLASMIC_DOMAIN (PHOBIUS); TRANSMEMBRANE (P…	no GO terms	no GO terms
TRUE	[INTERPRO, BLASTED, MAPPED, GO-SLIM]	scaffold_000088F_transcript_id_14849seq_length_3261	protein phosphatase 1L	3261	20	5.48761e-164	59.07	1	F:GO:0003674	F:molecular_function			IPR001932 (SMART); IPR001932 (SMART); IPR001932 (PFAM); mobidb-lite (MOBIDB_LITE); IPR015655 (PANTHER); IPR000222 (PROSITE_PATTERNS); NON_CYTOPLASMIC_DOMAIN (PHOBIUS); SIGNAL_PEPTIDE_N_REGION (PHOBIUS); SIGNAL_PEPTIDE (PHOBIUS); SIGNAL_PEPTIDE_H_REGION (PHOBIUS); SIGNAL_PEPTIDE_C_REGION (PHOBIUS); IPR001932 (PROSITE_PROFILES); IPR001932 (CDD); SignalP-noTM (SIGNALP_EUK); SignalP-TM (SIGNALP_GRAM_…	F:GO:0003824; F:GO:0004722; P:GO:0006470; F:GO:0043169	F:catalytic activity; F:protein serine/threonine phosphatase activity; P:protein dephosphorylation; F:cation binding
TRUE	[INTERPRO, BLASTED]	scaffold_000017F_transcript_id_23067seq_length_638	leucine-rich repeat-containing protein AAC1-like	638	2	1.45869e-12	77.97						no IPS match	no IPS match	no IPS match
TRUE	[INTERPRO, BLASTED, MAPPED, GO-SLIM]	scaffold_000308F_transcript_id_4476seq_length_1804	V-type proton ATPase catalytic subunit A	1804	20	0	97.4	11	C:GO:0005764; C:GO:0005886; P:GO:0006091; F:GO:0008289; F:GO:0016887; F:GO:0022857; F:GO:0030234; C:GO:0032991; P:GO:0034641; F:GO:0043167; P:GO:0044281	C:lysosome; C:plasma membrane; P:generation of precursor metabolites and energy; F:lipid binding; F:ATPase activity; F:transmembrane transporter activity; F:enzyme regulator activity; C:protein-containing complex; P:cellular nitrogen compound metabolic process; F:ion binding; P:small molecule metabolic process	EC:3.6.1.3; EC:3.6.1.15	Adenosinetriphosphatase; Nucleoside-triphosphate phosphatase	G3DSA:2.40.50.100 (GENE3D); IPR023366 (G3DSA:2.40.30.GENE3D); G3DSA:3.40.50.300 (GENE3D); IPR024034 (G3DSA:1.10.1140.GENE3D); IPR005725 (TIGRFAM); IPR004100 (PFAM); IPR000194 (PFAM); IPR031686 (PFAM); PTHR43607:SF4 (PANTHER); IPR022878 (PANTHER); IPR020003 (PROSITE_PATTERNS); cd01134 (CDD); IPR036121 (SUPERFAMILY); IPR027417 (SUPERFAMILY); SSF47917 (SUPERFAMILY)	F:GO:0005524; P:GO:0015991; C:GO:0033180; P:GO:0046034; F:GO:0046961; P:GO:1902600	F:ATP binding; P:ATP hydrolysis coupled proton transport; C:proton-transporting V-type ATPase, V1 domain; P:ATP metabolic process; F:proton-transporting ATPase activity, rotational mechanism; P:proton transmembrane transport
TRUE	[INTERPRO, BLASTED, MAPPED, GO-SLIM]	scaffold_000097F_transcript_id_11677seq_length_2278	arylsulfatase B	2278	20	0	77.98	2	F:GO:0003674; P:GO:0008150	F:molecular_function; P:biological_process			IPR000917 (PFAM); PTHR10342 (PANTHER); PTHR10342:SF263 (PANTHER); IPR024607 (PROSITE_PATTERNS); NON_CYTOPLASMIC_DOMAIN (PHOBIUS); SIGNAL_PEPTIDE_N_REGION (PHOBIUS); SIGNAL_PEPTIDE_C_REGION (PHOBIUS); SIGNAL_PEPTIDE_H_REGION (PHOBIUS); SIGNAL_PEPTIDE (PHOBIUS); cd16029 (CDD); SignalP-noTM (SIGNALP_EUK); IPR017850 (SUPERFAMILY)	F:GO:0003824; P:GO:0008152; F:GO:0008484	F:catalytic activity; P:metabolic process; F:sulfuric ester hydrolase activity
TRUE	[INTERPRO, BLASTED]	scaffold_000460F_transcript_id_6858seq_length_3848	capon-like protein isoform X2	3848	20	0	64.35						Coil (COILS); IPR011993 (G3DSA:2.30.29.GENE3D); IPR006020 (PFAM); mobidb-lite (MOBIDB_LITE); mobidb-lite (MOBIDB_LITE); mobidb-lite (MOBIDB_LITE); PTHR11232:SF55 (PANTHER); PTHR11232 (PANTHER); IPR006020 (PROSITE_PROFILES); SSF50729 (SUPERFAMILY)	F:GO:0005515	F:protein binding
TRUE	[INTERPRO, BLASTED, MAPPED, GO-SLIM]	scaffold_000067F_transcript_id_12898seq_length_1281	aspartate aminotransferase, cytoplasmic	1281	20	0	79.66	5	P:GO:0006520; P:GO:0006790; P:GO:0009058; P:GO:0034641; F:GO:0043167	P:cellular amino acid metabolic process; P:sulfur compound metabolic process; P:biosynthetic process; P:cellular nitrogen compound metabolic process; F:ion binding	EC:2.6.1.1	Aspartate transaminase	IPR000796 (PRINTS); IPR004839 (PFAM); IPR015421 (G3DSA:3.40.640.GENE3D); IPR015422 (G3DSA:3.90.1150.GENE3D); IPR000796 (PANTHER); cd00609 (CDD); IPR015424 (SUPERFAMILY)	F:GO:0003824; P:GO:0006520; F:GO:0008483; P:GO:0009058; F:GO:0030170	F:catalytic activity; P:cellular amino acid metabolic process; F:transaminase activity; P:biosynthetic process; F:pyridoxal phosphate binding
TRUE	[INTERPRO, BLASTED]	scaffold_000286F_transcript_id_4440seq_length_2015	kelch-like protein 5	2015	20	0	77.63						IPR011705 (SMART); IPR000210 (SMART); IPR000210 (PFAM); IPR011705 (PFAM); G3DSA:1.25.40.420 (GENE3D); G3DSA:3.30.710.10 (GENE3D); mobidb-lite (MOBIDB_LITE); PTHR24412 (PANTHER); PTHR24412:SF74 (PANTHER); IPR000210 (PROSITE_PROFILES); cd14735 (CDD); IPR011333 (SUPERFAMILY)	F:GO:0005515	F:protein binding
TRUE	[INTERPRO, BLASTED, MAPPED, GO-SLIM]	scaffold_000176F_transcript_id_12042seq_length_2156	putative cysteine proteinase CG12163	2156	20	0	67.76	1	F:GO:0003674	F:molecular_function			IPR000668 (PRINTS); IPR013201 (SMART); IPR000668 (SMART); G3DSA:3.90.70.10 (GENE3D); IPR013201 (PFAM); IPR000668 (PFAM); IPR013128 (PANTHER); PTHR12411:SF444 (PANTHER); IPR000169 (PROSITE_PATTERNS); IPR025660 (PROSITE_PATTERNS); IPR025661 (PROSITE_PATTERNS); SIGNAL_PEPTIDE_N_REGION (PHOBIUS); NON_CYTOPLASMIC_DOMAIN (PHOBIUS); SIGNAL_PEPTIDE_H_REGION (PHOBIUS); SIGNAL_PEPTIDE_C_REGION (PHOBIUS); S…	P:GO:0006508; F:GO:0008234	P:proteolysis; F:cysteine-type peptidase activity
TRUE	[INTERPRO, BLASTED, MAPPED, GO-SLIM]	scaffold_000067F_transcript_id_13305seq_length_2073	UDP-glucuronosyltransferase 2B20-like	2073	20	0	66.58	1	F:GO:0003674	F:molecular_function			G3DSA:3.40.50.2000 (GENE3D); IPR002213 (PFAM); G3DSA:3.40.50.2000 (GENE3D); PTHR11926 (PANTHER); PTHR11926:SF151 (PANTHER); IPR035595 (PROSITE_PATTERNS); SIGNAL_PEPTIDE_H_REGION (PHOBIUS); SIGNAL_PEPTIDE_C_REGION (PHOBIUS); SIGNAL_PEPTIDE_N_REGION (PHOBIUS); TRANSMEMBRANE (PHOBIUS); CYTOPLASMIC_DOMAIN (PHOBIUS); NON_CYTOPLASMIC_DOMAIN (PHOBIUS); SIGNAL_PEPTIDE (PHOBIUS); cd03784 (CDD); SignalP-no…	P:GO:0008152; F:GO:0016758	P:metabolic process; F:transferase activity, transferring hexosyl groups
TRUE	[INTERPRO, BLASTED, MAPPED]	scaffold_000012F_transcript_id_21357seq_length_1743	endonuclease-reverse transcriptase	1743	20	5.89055e-135	63.52	4	F:GO:0003964; F:GO:0004519; P:GO:0006278; P:GO:0090305	F:RNA-directed DNA polymerase activity; F:endonuclease activity; P:RNA-dependent DNA biosynthetic process; P:nucleic acid phosphodiester bond hydrolysis			IPR000477 (PFAM); G3DSA:3.30.70.270 (GENE3D); PTHR45030 (PANTHER); IPR000477 (PROSITE_PROFILES); cd01650 (CDD); SSF56672 (SUPERFAMILY)	no GO terms	no GO terms
TRUE	[INTERPRO, BLASTED, MAPPED, GO-SLIM]	scaffold_000672F_transcript_id_2603seq_length_2476	probable cytochrome P450 6a14	2476	20	0	70.12	2	F:GO:0016491; F:GO:0043167	F:oxidoreductase activity; F:ion binding			IPR002401 (PRINTS); IPR001128 (PRINTS); IPR001128 (PFAM); IPR036396 (G3DSA:1.10.630.GENE3D); PTHR24292 (PANTHER); IPR017972 (PROSITE_PATTERNS); NON_CYTOPLASMIC_DOMAIN (PHOBIUS); SIGNAL_PEPTIDE (PHOBIUS); SIGNAL_PEPTIDE_C_REGION (PHOBIUS); SIGNAL_PEPTIDE_N_REGION (PHOBIUS); SIGNAL_PEPTIDE_H_REGION (PHOBIUS); IPR036396 (SUPERFAMILY)	F:GO:0005506; F:GO:0016705; F:GO:0020037; P:GO:0055114	F:iron ion binding; F:oxidoreductase activity, acting on paired donors, with incorporation or reduction of molecular oxygen; F:heme binding; P:oxidation-reduction process
TRUE	[INTERPRO, BLASTED, MAPPED, GO-SLIM]	scaffold_000012F_transcript_id_21668seq_length_2169	2-oxoisovalerate dehydrogenase subunit alpha, mitochondrial	2169	20	0	76.35	1	F:GO:0016491	F:oxidoreductase activity			IPR001017 (PFAM); G3DSA:3.40.50.970 (GENE3D); IPR034616 (PTHR43380:PANTHER); PTHR43380 (PANTHER); cd02000 (CDD); SignalP-TM (SIGNALP_GRAM_POSITIVE); IPR029061 (SUPERFAMILY)	F:GO:0003826; F:GO:0003863; P:GO:0008152; P:GO:0009083; F:GO:0016624	F:alpha-ketoacid dehydrogenase activity; F:3-methyl-2-oxobutanoate dehydrogenase (2-methylpropanoyl-transferring) activity; P:metabolic process; P:branched-chain amino acid catabolic process; F:oxidoreductase activity, acting on the aldehyde or oxo group of donors, disulfide as acceptor
TRUE	[INTERPRO, BLASTED, MAPPED]	scaffold_000207F_transcript_id_12846seq_length_1341	H2.0-like homeobox protein	1341	20	1.60507e-132	61.98	7	F:GO:0003677; C:GO:0005634; P:GO:0006355; C:GO:0016020; C:GO:0016021; F:GO:0016787; F:GO:0043565	F:DNA binding; C:nucleus; P:regulation of transcription, DNA-templated; C:membrane; C:integral component of membrane; F:hydrolase activity; F:sequence-specific DNA binding			IPR000047 (PRINTS); IPR020479 (PRINTS); IPR001356 (SMART); IPR001356 (PFAM); G3DSA:1.10.10.60 (GENE3D); PTHR24331 (PANTHER); PTHR24331:SF7 (PANTHER); IPR017970 (PROSITE_PATTERNS); IPR001356 (PROSITE_PROFILES); IPR001356 (CDD); IPR009057 (SUPERFAMILY)	F:GO:0003677; P:GO:0006355; F:GO:0043565	F:DNA binding; P:regulation of transcription, DNA-templated; F:sequence-specific DNA binding
TRUE	[INTERPRO, BLASTED, MAPPED, GO-SLIM]	scaffold_000307F_transcript_id_5716seq_length_1213	transmembrane emp24 domain-containing protein 5	1213	20	7.63124e-165	66.21	2	C:GO:0005737; C:GO:0043226	C:cytoplasm; C:organelle			IPR009038 (SMART); IPR009038 (PFAM); PTHR22811:SF59 (PANTHER); IPR015720 (PANTHER); CYTOPLASMIC_DOMAIN (PHOBIUS); NON_CYTOPLASMIC_DOMAIN (PHOBIUS); TRANSMEMBRANE (PHOBIUS); IPR009038 (PROSITE_PROFILES); SignalP-noTM (SIGNALP_EUK); IPR036598 (SUPERFAMILY); TMhelix (TMHMM)	no GO terms	no GO terms
TRUE	[INTERPRO, BLASTED]	scaffold_000191F_transcript_id_5703seq_length_1686	PREDICTED: uncharacterized protein LOC109031936	1686	20	0	61.96						IPR015897 (SMART); IPR004119 (PFAM); PTHR11012 (PANTHER); IPR011009 (SUPERFAMILY)	no GO terms	no GO terms
TRUE	[INTERPRO, BLASTED]	scaffold_000527F_transcript_id_594seq_length_2910	UDP-glucuronosyltransferase 2B7-like isoform X3	2910	20	0	73.61						G3DSA:3.40.50.2000 (GENE3D); IPR002213 (PFAM); PTHR11926:SF151 (PANTHER); PTHR11926 (PANTHER); SIGNAL_PEPTIDE_H_REGION (PHOBIUS); SIGNAL_PEPTIDE_N_REGION (PHOBIUS); NON_CYTOPLASMIC_DOMAIN (PHOBIUS); SIGNAL_PEPTIDE (PHOBIUS); CYTOPLASMIC_DOMAIN (PHOBIUS); SIGNAL_PEPTIDE_C_REGION (PHOBIUS); TRANSMEMBRANE (PHOBIUS); PS51257 (PROSITE_PROFILES); SignalP-noTM (SIGNALP_EUK); SSF53756 (SUPERFAMILY); TMhe…	P:GO:0008152; F:GO:0016758	P:metabolic process; F:transferase activity, transferring hexosyl groups
TRUE	[INTERPRO, BLASTED]	scaffold_000218F_transcript_id_5408seq_length_4457	atrial natriuretic peptide receptor 1-like isoform X2	4457	20	0	78.09						Coil (COILS); IPR001170 (PRINTS); IPR001054 (SMART); G3DSA:3.40.50.2300 (GENE3D); G3DSA:3.40.50.2300 (GENE3D); IPR029787 (G3DSA:3.30.70.GENE3D); IPR001828 (PFAM); IPR001245 (PFAM); G3DSA:1.10.510.10 (GENE3D); IPR001054 (PFAM); mobidb-lite (MOBIDB_LITE); mobidb-lite (MOBIDB_LITE); PTHR11920 (PANTHER); PTHR11920:SF456 (PANTHER); IPR018297 (PROSITE_PATTERNS); CYTOPLASMIC_DOMAIN (PHOBIUS); NON_CYTOPL…	F:GO:0004672; F:GO:0005524; P:GO:0006468; P:GO:0009190; C:GO:0016021; F:GO:0016849; P:GO:0035556	F:protein kinase activity; F:ATP binding; P:protein phosphorylation; P:cyclic nucleotide biosynthetic process; C:integral component of membrane; F:phosphorus-oxygen lyase activity; P:intracellular signal transduction
TRUE	[INTERPRO, BLASTED, MAPPED]	scaffold_000100F_transcript_id_15613seq_length_1565	facilitated trehalose transporter Tret1-like	1565	20	0	65.33	6	F:GO:0005215; P:GO:0008643; C:GO:0016020; C:GO:0016021; F:GO:0022857; P:GO:0055085	F:transporter activity; P:carbohydrate transport; C:membrane; C:integral component of membrane; F:transmembrane transporter activity; P:transmembrane transport			G3DSA:1.20.1250.20 (GENE3D); IPR005828 (PFAM); PTHR23500 (PANTHER); PTHR23500:SF37 (PANTHER); IPR005829 (PROSITE_PATTERNS); TRANSMEMBRANE (PHOBIUS); TRANSMEMBRANE (PHOBIUS); SIGNAL_PEPTIDE_N_REGION (PHOBIUS); NON_CYTOPLASMIC_DOMAIN (PHOBIUS); NON_CYTOPLASMIC_DOMAIN (PHOBIUS); CYTOPLASMIC_DOMAIN (PHOBIUS); TRANSMEMBRANE (PHOBIUS); SIGNAL_PEPTIDE_C_REGION (PHOBIUS); TRANSMEMBRANE (PHOBIUS); CYTOPLA…	F:GO:0005215; C:GO:0016021; F:GO:0022857; P:GO:0055085	F:transporter activity; C:integral component of membrane; F:transmembrane transporter activity; P:transmembrane transport
TRUE	[INTERPRO, BLASTED, MAPPED]	scaffold_000193F_transcript_id_4708seq_length_2172	cytochrome b5-related protein-like	2172	20	0	65.93	7	P:GO:0006629; C:GO:0016020; C:GO:0016021; F:GO:0016491; F:GO:0020037; F:GO:0046872; P:GO:0055114	P:lipid metabolic process; C:membrane; C:integral component of membrane; F:oxidoreductase activity; F:heme binding; F:metal ion binding; P:oxidation-reduction process			IPR001199 (SMART); IPR036400 (G3DSA:3.10.120.GENE3D); IPR001199 (PFAM); IPR005804 (PFAM); PTHR16740 (PANTHER); TRANSMEMBRANE (PHOBIUS); TRANSMEMBRANE (PHOBIUS); CYTOPLASMIC_DOMAIN (PHOBIUS); NON_CYTOPLASMIC_DOMAIN (PHOBIUS); TRANSMEMBRANE (PHOBIUS); CYTOPLASMIC_DOMAIN (PHOBIUS); NON_CYTOPLASMIC_DOMAIN (PHOBIUS); TRANSMEMBRANE (PHOBIUS); TRANSMEMBRANE (PHOBIUS); CYTOPLASMIC_DOMAIN (PHOBIUS); CYTOP…	P:GO:0006629	P:lipid metabolic process
TRUE	[INTERPRO, BLASTED, MAPPED, GO-SLIM]	scaffold_000009F_transcript_id_26670seq_length_3010	trehalase-like isoform X1	3010	20	0	76.05	2	P:GO:0008150; F:GO:0016798	P:biological_process; F:hydrolase activity, acting on glycosyl bonds			IPR001661 (PRINTS); IPR001661 (PFAM); IPR012341 (G3DSA:1.50.10.GENE3D); PTHR23403:SF1 (PANTHER); IPR001661 (PANTHER); IPR018232 (PROSITE_PATTERNS); IPR018232 (PROSITE_PATTERNS); IPR008928 (SUPERFAMILY)	F:GO:0003824; F:GO:0004555; P:GO:0005991	F:catalytic activity; F:alpha,alpha-trehalase activity; P:trehalose metabolic process
TRUE	[INTERPRO, BLASTED, MAPPED, GO-SLIM]	scaffold_000240F_transcript_id_14072seq_length_4395	protein glass-like	4395	20	0	96.24	1	F:GO:0003677	F:DNA binding			IPR013087 (SMART); PF00096 (PFAM); G3DSA:3.30.160.60 (GENE3D); G3DSA:3.30.160.60 (GENE3D); G3DSA:3.30.160.60 (GENE3D); G3DSA:3.30.160.60 (GENE3D); G3DSA:3.30.160.60 (GENE3D); mobidb-lite (MOBIDB_LITE); mobidb-lite (MOBIDB_LITE); PTHR24377:SF698 (PANTHER); PTHR24377 (PANTHER); IPR013087 (PROSITE_PATTERNS); IPR013087 (PROSITE_PATTERNS); IPR013087 (PROSITE_PATTERNS); IPR013087 (PROSITE_PATTERNS); IP…	F:GO:0003676	F:nucleic acid binding
TRUE	[INTERPRO, BLASTED, MAPPED, GO-SLIM]	scaffold_000156F_transcript_id_9451seq_length_2411	sodium/nucleoside cotransporter 2-like	2411	20	0	74.03	2	C:GO:0005575; F:GO:0022857	C:cellular_component; F:transmembrane transporter activity			IPR002668 (PFAM); IPR018270 (TIGRFAM); IPR011657 (PFAM); mobidb-lite (MOBIDB_LITE); mobidb-lite (MOBIDB_LITE); mobidb-lite (MOBIDB_LITE); IPR008276 (PANTHER); TRANSMEMBRANE (PHOBIUS); TRANSMEMBRANE (PHOBIUS); TRANSMEMBRANE (PHOBIUS); TRANSMEMBRANE (PHOBIUS); CYTOPLASMIC_DOMAIN (PHOBIUS); CYTOPLASMIC_DOMAIN (PHOBIUS); NON_CYTOPLASMIC_DOMAIN (PHOBIUS); CYTOPLASMIC_DOMAIN (PHOBIUS); TRANSMEMBRANE (P…	F:GO:0005337; C:GO:0016020; P:GO:1901642	F:nucleoside transmembrane transporter activity; C:membrane; P:nucleoside transmembrane transport
TRUE	[INTERPRO, BLASTED, MAPPED, GO-SLIM]	scaffold_000125F_transcript_id_12089seq_length_2421	putative RNA-directed DNA polymerase from transposon X-element	2421	20	2.43813e-180	55.55	2	P:GO:0006259; F:GO:0016779	P:DNA metabolic process; F:nucleotidyltransferase activity			IPR036691 (G3DSA:3.60.10.GENE3D); IPR005135 (PFAM); IPR000477 (PFAM); mobidb-lite (MOBIDB_LITE); mobidb-lite (MOBIDB_LITE); PTHR45030 (PANTHER); IPR000477 (PROSITE_PROFILES); cd01650 (CDD); SSF56672 (SUPERFAMILY); IPR036691 (SUPERFAMILY)	no GO terms	no GO terms
TRUE	[INTERPRO, BLASTED, MAPPED]	scaffold_000004F_transcript_id_24022seq_length_2590	excitatory amino acid transporter 2 isoform X2	2590	20	0	72.7	4	F:GO:0015293; C:GO:0016020; C:GO:0016021; P:GO:0055085	F:symporter activity; C:membrane; C:integral component of membrane; P:transmembrane transport			PR00173 (PRINTS); IPR001991 (PFAM); IPR036458 (G3DSA:1.10.3860.GENE3D); PTHR11958:SF89 (PANTHER); PTHR11958 (PANTHER); NON_CYTOPLASMIC_DOMAIN (PHOBIUS); TRANSMEMBRANE (PHOBIUS); CYTOPLASMIC_DOMAIN (PHOBIUS); CYTOPLASMIC_DOMAIN (PHOBIUS); NON_CYTOPLASMIC_DOMAIN (PHOBIUS); CYTOPLASMIC_DOMAIN (PHOBIUS); TRANSMEMBRANE (PHOBIUS); TRANSMEMBRANE (PHOBIUS); TRANSMEMBRANE (PHOBIUS); CYTOPLASMIC_DOMAIN (PH…	F:GO:0015293; C:GO:0016021	F:symporter activity; C:integral component of membrane
TRUE	[INTERPRO, BLASTED]	scaffold_000089F_transcript_id_16110seq_length_802	myophilin	802	20	8.2523e-136	91.89						IPR003096 (PRINTS); IPR001715 (SMART); IPR036872 (G3DSA:1.10.418.GENE3D); IPR001715 (PFAM); IPR000557 (PFAM); PTHR18959 (PANTHER); PTHR18959:SF83 (PANTHER); IPR000557 (PROSITE_PATTERNS); IPR000557 (PROSITE_PROFILES); IPR001715 (PROSITE_PROFILES); IPR001715 (CDD); IPR036872 (SUPERFAMILY)	F:GO:0005515	F:protein binding
TRUE	[INTERPRO, BLASTED, MAPPED, GO-SLIM]	scaffold_000136F_transcript_id_16425seq_length_2459	72 kDa inositol polyphosphate 5-phosphatase isoform X2	2459	20	0	72.3	2	F:GO:0003674; P:GO:0006629	F:molecular_function; P:lipid metabolic process			IPR000300 (SMART); IPR036691 (G3DSA:3.60.10.GENE3D); IPR005135 (PFAM); mobidb-lite (MOBIDB_LITE); PTHR11200 (PANTHER); PTHR11200:SF165 (PANTHER); CYTOPLASMIC_DOMAIN (PHOBIUS); TRANSMEMBRANE (PHOBIUS); NON_CYTOPLASMIC_DOMAIN (PHOBIUS); SignalP-TM (SIGNALP_GRAM_POSITIVE); IPR036691 (SUPERFAMILY)	P:GO:0046856	P:phosphatidylinositol dephosphorylation
TRUE	[INTERPRO, BLASTED, MAPPED, GO-SLIM]	scaffold_000007F_transcript_id_24954seq_length_2002	cyclin-dependent kinase 1	2002	20	0	82.51	5	P:GO:0006464; P:GO:0006520; F:GO:0016301; F:GO:0043167; P:GO:0051301	P:cellular protein modification process; P:cellular amino acid metabolic process; F:kinase activity; F:ion binding; P:cell division	EC:2.7.11	Transferring phosphorus-containing groups	IPR000719 (SMART); IPR000719 (PFAM); PIRSF000654 (PIRSF); G3DSA:1.10.510.10 (GENE3D); G3DSA:3.30.200.20 (GENE3D); PTHR24056:SF334 (PANTHER); PTHR24056 (PANTHER); IPR017441 (PROSITE_PATTERNS); IPR008271 (PROSITE_PATTERNS); SIGNAL_PEPTIDE_C_REGION (PHOBIUS); SIGNAL_PEPTIDE_H_REGION (PHOBIUS); NON_CYTOPLASMIC_DOMAIN (PHOBIUS); SIGNAL_PEPTIDE (PHOBIUS); SIGNAL_PEPTIDE_N_REGION (PHOBIUS); IPR000719 (P…	F:GO:0004672; F:GO:0005524; P:GO:0006468	F:protein kinase activity; F:ATP binding; P:protein phosphorylation
TRUE	[INTERPRO, BLASTED, MAPPED, GO-SLIM]	scaffold_000122F_transcript_id_15753seq_length_1402	cystathionine beta-synthase	1402	20	0	82.39	6	C:GO:0005737; P:GO:0006520; P:GO:0006790; P:GO:0009058; F:GO:0016829; F:GO:0043167	C:cytoplasm; P:cellular amino acid metabolic process; P:sulfur compound metabolic process; P:biosynthetic process; F:lyase activity; F:ion binding	EC:4.2.1.22	Cystathionine beta-synthase	IPR005857 (TIGRFAM); IPR001926 (PFAM); G3DSA:3.40.50.1100 (GENE3D); G3DSA:3.40.50.1100 (GENE3D); mobidb-lite (MOBIDB_LITE); PTHR10314:SF134 (PANTHER); PTHR10314 (PANTHER); IPR001216 (PROSITE_PATTERNS); cd01561 (CDD); IPR036052 (SUPERFAMILY)	F:GO:0004122; C:GO:0005737; P:GO:0006535; P:GO:0019343	F:cystathionine beta-synthase activity; C:cytoplasm; P:cysteine biosynthetic process from serine; P:cysteine biosynthetic process via cystathionine
TRUE	[INTERPRO, BLASTED, MAPPED]	scaffold_000464F_transcript_id_12016seq_length_1917	cathepsin B-like	1917	20	5.44661e-166	69.76	4	F:GO:0004197; P:GO:0006508; F:GO:0008234; P:GO:0050790	F:cysteine-type endopeptidase activity; P:proteolysis; F:cysteine-type peptidase activity; P:regulation of catalytic activity			IPR000668 (SMART); IPR000668 (PFAM); G3DSA:3.90.70.10 (GENE3D); IPR012599 (PFAM); mobidb-lite (MOBIDB_LITE); PTHR12411:SF540 (PANTHER); IPR013128 (PANTHER); IPR000169 (PROSITE_PATTERNS); SIGNAL_PEPTIDE_H_REGION (PHOBIUS); SIGNAL_PEPTIDE (PHOBIUS); NON_CYTOPLASMIC_DOMAIN (PHOBIUS); SIGNAL_PEPTIDE_C_REGION (PHOBIUS); SIGNAL_PEPTIDE_N_REGION (PHOBIUS); SignalP-TM (SIGNALP_GRAM_POSITIVE); SignalP-noT…	F:GO:0004197; P:GO:0006508; F:GO:0008234; P:GO:0050790	F:cysteine-type endopeptidase activity; P:proteolysis; F:cysteine-type peptidase activity; P:regulation of catalytic activity
TRUE	[INTERPRO, BLASTED, MAPPED, GO-SLIM]	scaffold_000176F_transcript_id_11595seq_length_3651	beta-hexosaminidase subunit beta-like	3651	20	0	62.44	1	F:GO:0016798	F:hydrolase activity, acting on glycosyl bonds			IPR025705 (PRINTS); IPR015883 (PFAM); G3DSA:3.20.20.80 (GENE3D); IPR025705 (PIRSF); IPR029018 (G3DSA:3.30.379.GENE3D); IPR029019 (PFAM); mobidb-lite (MOBIDB_LITE); mobidb-lite (MOBIDB_LITE); mobidb-lite (MOBIDB_LITE); PTHR22600 (PANTHER); PTHR22600:SF20 (PANTHER); NON_CYTOPLASMIC_DOMAIN (PHOBIUS); TRANSMEMBRANE (PHOBIUS); CYTOPLASMIC_DOMAIN (PHOBIUS); cd06562 (CDD); IPR017853 (SUPERFAMILY); IPR02…	F:GO:0004553; F:GO:0004563; P:GO:0005975	F:hydrolase activity, hydrolyzing O-glycosyl compounds; F:beta-N-acetylhexosaminidase activity; P:carbohydrate metabolic process
TRUE	[INTERPRO, BLASTED, MAPPED]	scaffold_000059F_transcript_id_16372seq_length_1410	protein BCCIP homolog	1410	20	7.36026e-166	65.42	2	C:GO:0016020; C:GO:0016021	C:membrane; C:integral component of membrane			IPR025602 (PFAM); IPR025602 (PIRSF); mobidb-lite (MOBIDB_LITE); mobidb-lite (MOBIDB_LITE); IPR025602 (PANTHER)	no GO terms	no GO terms
TRUE	[INTERPRO, BLASTED, MAPPED]	scaffold_000108F_transcript_id_14586seq_length_2150	solute carrier family 25 member 35-like	2150	20	0	70.71	2	C:GO:0016020; C:GO:0016021	C:membrane; C:integral component of membrane			IPR023395 (G3DSA:1.50.40.GENE3D); IPR018108 (PFAM); PTHR24089:SF611 (PANTHER); PTHR24089 (PANTHER); SIGNAL_PEPTIDE_H_REGION (PHOBIUS); NON_CYTOPLASMIC_DOMAIN (PHOBIUS); SIGNAL_PEPTIDE_C_REGION (PHOBIUS); SIGNAL_PEPTIDE_N_REGION (PHOBIUS); SIGNAL_PEPTIDE (PHOBIUS); IPR018108 (PROSITE_PROFILES); IPR018108 (PROSITE_PROFILES); IPR018108 (PROSITE_PROFILES); IPR023395 (SUPERFAMILY)	no GO terms	no GO terms
TRUE	[INTERPRO, BLASTED, MAPPED, GO-SLIM]	scaffold_000231F_transcript_id_5222seq_length_1535	guanine nucleotide-binding protein G(o) subunit alpha	1535	20	2.3208e-162	98.05	3	F:GO:0003924; P:GO:0007165; F:GO:0043167	F:GTPase activity; P:signal transduction; F:ion binding	EC:3.6.1.15	Nucleoside-triphosphate phosphatase	IPR001019 (PRINTS); IPR001019 (SMART); IPR001019 (PFAM); IPR011025 (G3DSA:1.10.400.GENE3D); PTHR10218:SF73 (PANTHER); IPR001019 (PANTHER); IPR001019 (CDD); IPR027417 (SUPERFAMILY); IPR011025 (SUPERFAMILY)	F:GO:0003924; P:GO:0007165; P:GO:0007186; F:GO:0019001; F:GO:0031683	F:GTPase activity; P:signal transduction; P:G-protein coupled receptor signaling pathway; F:guanyl nucleotide binding; F:G-protein beta/gamma-subunit complex binding
TRUE	[INTERPRO, BLASTED, MAPPED, GO-SLIM]	scaffold_000007F_transcript_id_25180seq_length_2452	phospholipid phosphatase 6	2452	20	5.57373e-141	71.77	1	C:GO:0005575	C:cellular_component			IPR000326 (SMART); IPR000326 (PFAM); G3DSA:1.20.144.10 (GENE3D); mobidb-lite (MOBIDB_LITE); mobidb-lite (MOBIDB_LITE); PTHR14969 (PANTHER); PTHR14969:SF13 (PANTHER); CYTOPLASMIC_DOMAIN (PHOBIUS); TRANSMEMBRANE (PHOBIUS); TRANSMEMBRANE (PHOBIUS); TRANSMEMBRANE (PHOBIUS); CYTOPLASMIC_DOMAIN (PHOBIUS); CYTOPLASMIC_DOMAIN (PHOBIUS); TRANSMEMBRANE (PHOBIUS); NON_CYTOPLASMIC_DOMAIN (PHOBIUS); NON_CYTOP…	no GO terms	no GO terms
TRUE	[INTERPRO, BLASTED]	scaffold_000730F_transcript_id_10424seq_length_1995	UDP-glucuronosyltransferase 2B18-like	1995	20	0	75.89						G3DSA:3.40.50.2000 (GENE3D); IPR002213 (PFAM); PTHR11926 (PANTHER); PTHR11926:SF151 (PANTHER); IPR035595 (PROSITE_PATTERNS); SIGNAL_PEPTIDE_H_REGION (PHOBIUS); NON_CYTOPLASMIC_DOMAIN (PHOBIUS); SIGNAL_PEPTIDE (PHOBIUS); SIGNAL_PEPTIDE_N_REGION (PHOBIUS); SIGNAL_PEPTIDE_C_REGION (PHOBIUS); SignalP-noTM (SIGNALP_EUK); SSF53756 (SUPERFAMILY)	P:GO:0008152; F:GO:0016758	P:metabolic process; F:transferase activity, transferring hexosyl groups
TRUE	[INTERPRO, BLASTED, MAPPED, GO-SLIM]	scaffold_000027F_transcript_id_21190seq_length_2721	calcitonin gene-related peptide type 1 receptor-like	2721	20	0	76.43	3	F:GO:0003674; C:GO:0005575; P:GO:0007165	F:molecular_function; C:cellular_component; P:signal transduction			IPR000832 (PRINTS); IPR001879 (SMART); IPR036445 (G3DSA:4.10.1240.GENE3D); G3DSA:1.20.1070.10 (GENE3D); IPR001879 (PFAM); IPR000832 (PFAM); PTHR12011 (PANTHER); PTHR12011:SF350 (PANTHER); TRANSMEMBRANE (PHOBIUS); NON_CYTOPLASMIC_DOMAIN (PHOBIUS); CYTOPLASMIC_DOMAIN (PHOBIUS); TRANSMEMBRANE (PHOBIUS); NON_CYTOPLASMIC_DOMAIN (PHOBIUS); NON_CYTOPLASMIC_DOMAIN (PHOBIUS); TRANSMEMBRANE (PHOBIUS); CYTO…	F:GO:0004888; F:GO:0004930; P:GO:0007166; P:GO:0007186; C:GO:0016020; C:GO:0016021	F:transmembrane signaling receptor activity; F:G-protein coupled receptor activity; P:cell surface receptor signaling pathway; P:G-protein coupled receptor signaling pathway; C:membrane; C:integral component of membrane
TRUE	[INTERPRO, BLASTED, MAPPED, GO-SLIM]	scaffold_000017F_transcript_id_23156seq_length_1804	putative methyltransferase DDB_G0268948	1804	20	7.11204e-98	83.54	1	F:GO:0008168	F:methyltransferase activity			IPR013216 (PFAM); G3DSA:3.40.50.150 (GENE3D); PTHR45180 (PANTHER); cd02440 (CDD); IPR029063 (SUPERFAMILY)	P:GO:0008152; F:GO:0008168	P:metabolic process; F:methyltransferase activity
TRUE	[INTERPRO, BLASTED, MAPPED, GO-SLIM]	scaffold_000041F_transcript_id_19295seq_length_987	zinc transporter ZIP13 homolog	987	20	0	72.36	2	C:GO:0005575; P:GO:0006810	C:cellular_component; P:transport			IPR003689 (PFAM); PTHR16950 (PANTHER); PTHR16950:SF24 (PANTHER); NON_CYTOPLASMIC_DOMAIN (PHOBIUS); NON_CYTOPLASMIC_DOMAIN (PHOBIUS); NON_CYTOPLASMIC_DOMAIN (PHOBIUS); CYTOPLASMIC_DOMAIN (PHOBIUS); TRANSMEMBRANE (PHOBIUS); TRANSMEMBRANE (PHOBIUS); TRANSMEMBRANE (PHOBIUS); CYTOPLASMIC_DOMAIN (PHOBIUS); TRANSMEMBRANE (PHOBIUS); NON_CYTOPLASMIC_DOMAIN (PHOBIUS); TRANSMEMBRANE (PHOBIUS); TRANSMEMBRANE…	C:GO:0016020; P:GO:0030001; F:GO:0046873; P:GO:0055085	C:membrane; P:metal ion transport; F:metal ion transmembrane transporter activity; P:transmembrane transport
TRUE	[INTERPRO, BLASTED, MAPPED]	scaffold_000019F_transcript_id_21720seq_length_2022	proton-coupled amino acid transporter-like protein CG1139	2022	20	0	74.24	2	C:GO:0016020; C:GO:0016021	C:membrane; C:integral component of membrane			IPR013057 (PFAM); PTHR22950 (PANTHER); PTHR22950:SF340 (PANTHER); TRANSMEMBRANE (PHOBIUS); NON_CYTOPLASMIC_DOMAIN (PHOBIUS); CYTOPLASMIC_DOMAIN (PHOBIUS); NON_CYTOPLASMIC_DOMAIN (PHOBIUS); TRANSMEMBRANE (PHOBIUS); NON_CYTOPLASMIC_DOMAIN (PHOBIUS); TRANSMEMBRANE (PHOBIUS); TRANSMEMBRANE (PHOBIUS); TRANSMEMBRANE (PHOBIUS); TRANSMEMBRANE (PHOBIUS); CYTOPLASMIC_DOMAIN (PHOBIUS); TRANSMEMBRANE (PHOBIU…	no GO terms	no GO terms
TRUE	[INTERPRO, BLASTED, MAPPED]	scaffold_000110F_transcript_id_8395seq_length_5499	Monocarboxylate transporter 12	5499	20	0	72.19	3	C:GO:0016020; C:GO:0016021; P:GO:0055085	C:membrane; C:integral component of membrane; P:transmembrane transport			G3DSA:1.20.1250.20 (GENE3D); G3DSA:1.20.1250.20 (GENE3D); IPR011701 (PFAM); mobidb-lite (MOBIDB_LITE); mobidb-lite (MOBIDB_LITE); PTHR11360 (PANTHER); PTHR11360:SF111 (PANTHER); PTHR11360 (PANTHER); PTHR11360:SF111 (PANTHER); TRANSMEMBRANE (PHOBIUS); TRANSMEMBRANE (PHOBIUS); CYTOPLASMIC_DOMAIN (PHOBIUS); NON_CYTOPLASMIC_DOMAIN (PHOBIUS); NON_CYTOPLASMIC_DOMAIN (PHOBIUS); NON_CYTOPLASMIC_DOMAIN (P…	C:GO:0016021; P:GO:0055085	C:integral component of membrane; P:transmembrane transport
TRUE	[INTERPRO, BLASTED]	scaffold_000000F_transcript_id_26692seq_length_1401	cathepsin K-like	1401	20	0	52.89						IPR013201 (SMART); IPR000668 (SMART); IPR000668 (PFAM); IPR013201 (PFAM); mobidb-lite (MOBIDB_LITE); PTHR12411:SF546 (PANTHER); IPR013128 (PANTHER); SIGNAL_PEPTIDE_N_REGION (PHOBIUS); SIGNAL_PEPTIDE_H_REGION (PHOBIUS); SIGNAL_PEPTIDE_C_REGION (PHOBIUS); NON_CYTOPLASMIC_DOMAIN (PHOBIUS); SIGNAL_PEPTIDE (PHOBIUS); IPR039417 (CDD); IPR038765 (SUPERFAMILY); TMhelix (TMHMM)	P:GO:0006508; F:GO:0008234	P:proteolysis; F:cysteine-type peptidase activity
TRUE	[INTERPRO, BLASTED, MAPPED, GO-SLIM]	scaffold_000027F_transcript_id_21538seq_length_1215	ribokinase-like	1215	20	0	69.39	2	F:GO:0003674; P:GO:0005975	F:molecular_function; P:carbohydrate metabolic process			IPR002139 (PRINTS); IPR011611 (PFAM); IPR029056 (G3DSA:3.40.1190.GENE3D); IPR011877 (TIGRFAM); PTHR10584 (PANTHER); PTHR10584:SF166 (PANTHER); IPR002173 (PROSITE_PATTERNS); IPR011877 (HAMAP); IPR011877 (CDD); IPR029056 (SUPERFAMILY)	F:GO:0004747; P:GO:0006014; F:GO:0016301; F:GO:0016773	F:ribokinase activity; P:D-ribose metabolic process; F:kinase activity; F:phosphotransferase activity, alcohol group as acceptor
TRUE	[INTERPRO, BLASTED, MAPPED, GO-SLIM]	scaffold_000188F_transcript_id_5864seq_length_2804	facilitated trehalose transporter Tret1-2 homolog isoform X1	2804	20	0	67.95	2	C:GO:0005575; F:GO:0022857	C:cellular_component; F:transmembrane transporter activity			IPR003663 (PRINTS); IPR003663 (TIGRFAM); G3DSA:1.20.1250.20 (GENE3D); IPR005828 (PFAM); mobidb-lite (MOBIDB_LITE); mobidb-lite (MOBIDB_LITE); PTHR23500:SF361 (PANTHER); PTHR23500 (PANTHER); IPR005829 (PROSITE_PATTERNS); IPR005829 (PROSITE_PATTERNS); CYTOPLASMIC_DOMAIN (PHOBIUS); NON_CYTOPLASMIC_DOMAIN (PHOBIUS); CYTOPLASMIC_DOMAIN (PHOBIUS); TRANSMEMBRANE (PHOBIUS); TRANSMEMBRANE (PHOBIUS); TRANS…	F:GO:0005215; C:GO:0016020; C:GO:0016021; F:GO:0022857; P:GO:0055085	F:transporter activity; C:membrane; C:integral component of membrane; F:transmembrane transporter activity; P:transmembrane transport
TRUE	[INTERPRO, BLASTED, MAPPED, GO-SLIM]	scaffold_000203F_transcript_id_9604seq_length_3511	protein disulfide-isomerase A3	3511	20	0	82.7	4	C:GO:0005623; F:GO:0016757; F:GO:0016853; P:GO:0042592	C:cell; F:transferase activity, transferring glycosyl groups; F:isomerase activity; P:homeostatic process	EC:5.3.4.1	Protein disulfide-isomerase	PR00421 (PRINTS); G3DSA:3.40.30.10 (GENE3D); G3DSA:3.40.30.10 (GENE3D); G3DSA:3.40.30.10 (GENE3D); IPR005788 (TIGRFAM); IPR005792 (TIGRFAM); G3DSA:3.40.30.10 (GENE3D); IPR013766 (PFAM); PF13848 (PFAM); PTHR18929 (PANTHER); PTHR18929:SF60 (PANTHER); IPR017937 (PROSITE_PATTERNS); IPR017937 (PROSITE_PATTERNS); SIGNAL_PEPTIDE_N_REGION (PHOBIUS); SIGNAL_PEPTIDE_C_REGION (PHOBIUS); SIGNAL_PEPTIDE_H_REG…	F:GO:0003756; F:GO:0016853; P:GO:0045454	F:protein disulfide isomerase activity; F:isomerase activity; P:cell redox homeostasis
TRUE	[INTERPRO, BLASTED, MAPPED, GO-SLIM]	scaffold_000095F_transcript_id_15020seq_length_1278	pyruvate dehydrogenase (acetyl-transferring) kinase, mitochondrial	1278	20	0	88.02	2	P:GO:0006464; F:GO:0016301	P:cellular protein modification process; F:kinase activity			IPR003594 (SMART); IPR036890 (G3DSA:3.30.565.GENE3D); IPR003594 (PFAM); IPR018955 (PFAM); IPR036784 (G3DSA:1.20.140.GENE3D); IPR039028 (PANTHER); PTHR11947:SF37 (PANTHER); IPR005467 (PROSITE_PROFILES); IPR003594 (CDD); IPR036890 (SUPERFAMILY); IPR036784 (SUPERFAMILY)	F:GO:0004672	F:protein kinase activity
TRUE	[INTERPRO, BLASTED, MAPPED, GO-SLIM]	scaffold_000104F_transcript_id_5400seq_length_2937	5-oxoprolinase isoform X2	2937	20	0	82.1	1	F:GO:0003674	F:molecular_function			IPR003692 (PFAM); IPR002821 (PFAM); PTHR11365:SF2 (PANTHER); PTHR11365 (PANTHER); SignalP-noTM (SIGNALP_EUK)	F:GO:0003824; F:GO:0016787	F:catalytic activity; F:hydrolase activity
TRUE	[INTERPRO, BLASTED, MAPPED, GO-SLIM]	scaffold_000546F_transcript_id_4401seq_length_840	putative inorganic phosphate cotransporter isoform X1	840	20	9.70076e-68	74.23	1	C:GO:0005575	C:cellular_component			PTHR11662 (PANTHER); PTHR11662:SF247 (PANTHER); CYTOPLASMIC_DOMAIN (PHOBIUS); NON_CYTOPLASMIC_DOMAIN (PHOBIUS); TRANSMEMBRANE (PHOBIUS); TMhelix (TMHMM); TMhelix (TMHMM)	no GO terms	no GO terms
TRUE	[INTERPRO, BLASTED, MAPPED]	scaffold_000018F_transcript_id_24075seq_length_652	mediator of RNA polymerase II transcription subunit 9	652	20	1.91234e-07	75.12	6	F:GO:0003712; C:GO:0005634; P:GO:0006351; P:GO:0006355; P:GO:0006357; C:GO:0016592	F:transcription coregulator activity; C:nucleus; P:transcription, DNA-templated; P:regulation of transcription, DNA-templated; P:regulation of transcription by RNA polymerase II; C:mediator complex			Coil (COILS); IPR011425 (PFAM); IPR039242 (PANTHER)	F:GO:0003712; P:GO:0006357; C:GO:0016592	F:transcription coregulator activity; P:regulation of transcription by RNA polymerase II; C:mediator complex
TRUE	[INTERPRO, BLASTED]	scaffold_000037F_transcript_id_19622seq_length_2081	cytochrome P450 4V2-like	2081	20	0	70.25						Coil (COILS); IPR001128 (PRINTS); IPR002401 (PRINTS); IPR036396 (G3DSA:1.10.630.GENE3D); IPR001128 (PFAM); PTHR24291 (PANTHER); TRANSMEMBRANE (PHOBIUS); NON_CYTOPLASMIC_DOMAIN (PHOBIUS); TRANSMEMBRANE (PHOBIUS); NON_CYTOPLASMIC_DOMAIN (PHOBIUS); CYTOPLASMIC_DOMAIN (PHOBIUS); IPR036396 (SUPERFAMILY); TMhelix (TMHMM); TMhelix (TMHMM)	F:GO:0005506; F:GO:0016705; F:GO:0020037; P:GO:0055114	F:iron ion binding; F:oxidoreductase activity, acting on paired donors, with incorporation or reduction of molecular oxygen; F:heme binding; P:oxidation-reduction process
TRUE	[INTERPRO, BLASTED, MAPPED]	scaffold_000583F_transcript_id_9656seq_length_2288	PP2C-like domain-containing protein CG9801 isoform X1	2288	20	0	67.46	1	F:GO:0003824	F:catalytic activity			IPR001932 (SMART); IPR001932 (SMART); IPR036457 (G3DSA:3.60.40.GENE3D); PF13672 (PFAM); PTHR21586 (PANTHER); PTHR21586:SF0 (PANTHER); SIGNAL_PEPTIDE_N_REGION (PHOBIUS); SIGNAL_PEPTIDE_H_REGION (PHOBIUS); SIGNAL_PEPTIDE (PHOBIUS); SIGNAL_PEPTIDE_C_REGION (PHOBIUS); NON_CYTOPLASMIC_DOMAIN (PHOBIUS); IPR001932 (PROSITE_PROFILES); IPR036457 (SUPERFAMILY)	F:GO:0003824	F:catalytic activity
TRUE	[INTERPRO, BLASTED]	scaffold_000050F_transcript_id_20210seq_length_2315	UDP-glucuronosyltransferase 2B18-like	2315	20	0	80.66						G3DSA:3.40.50.2000 (GENE3D); IPR002213 (PFAM); PTHR11926:SF151 (PANTHER); PTHR11926 (PANTHER); IPR035595 (PROSITE_PATTERNS); TRANSMEMBRANE (PHOBIUS); CYTOPLASMIC_DOMAIN (PHOBIUS); NON_CYTOPLASMIC_DOMAIN (PHOBIUS); CYTOPLASMIC_DOMAIN (PHOBIUS); TRANSMEMBRANE (PHOBIUS); SSF53756 (SUPERFAMILY); TMhelix (TMHMM); TMhelix (TMHMM)	P:GO:0008152; F:GO:0016758	P:metabolic process; F:transferase activity, transferring hexosyl groups
TRUE	[INTERPRO, BLASTED, MAPPED, GO-SLIM]	scaffold_000105F_transcript_id_C4WUE4.1seq_length_759	3-oxoacyl-[acyl-carrier-protein] reductase FabG-like	759	20	5.58378e-161	78.7	1	F:GO:0016491	F:oxidoreductase activity			IPR002347 (PRINTS); IPR002347 (PRINTS); SM00822 (SMART); G3DSA:3.40.50.720 (GENE3D); PF13561 (PFAM); PTHR43975 (PANTHER); PTHR43975:SF2 (PANTHER); IPR020904 (PROSITE_PATTERNS); NON_CYTOPLASMIC_DOMAIN (PHOBIUS); SIGNAL_PEPTIDE (PHOBIUS); SIGNAL_PEPTIDE_H_REGION (PHOBIUS); SIGNAL_PEPTIDE_N_REGION (PHOBIUS); SIGNAL_PEPTIDE_C_REGION (PHOBIUS); IPR036291 (SUPERFAMILY)	F:GO:0016491	F:oxidoreductase activity
TRUE	[INTERPRO, BLASTED, MAPPED, GO-SLIM]	scaffold_000249F_transcript_id_U5EUQ4.1seq_length_2067	protein sel-1 homolog 1 isoform X1	2067	20	0	80.36	1	C:GO:0005575	C:cellular_component			Coil (COILS); IPR006597 (SMART); IPR011990 (G3DSA:1.25.40.GENE3D); IPR011990 (G3DSA:1.25.40.GENE3D); IPR006597 (PFAM); PTHR11102 (PANTHER); NON_CYTOPLASMIC_DOMAIN (PHOBIUS); SIGNAL_PEPTIDE_H_REGION (PHOBIUS); SIGNAL_PEPTIDE_N_REGION (PHOBIUS); SIGNAL_PEPTIDE_C_REGION (PHOBIUS); SIGNAL_PEPTIDE (PHOBIUS); PS51257 (PROSITE_PROFILES); SignalP-noTM (SIGNALP_EUK); SignalP-noTM (SIGNALP_GRAM_NEGATIVE); …	F:GO:0005515	F:protein binding
TRUE	[INTERPRO, BLASTED, MAPPED]	scaffold_000429F_transcript_id_7231seq_length_2293	PP2C-like domain-containing protein CG9801	2293	20	0	67.65	1	F:GO:0003824	F:catalytic activity			IPR001932 (SMART); IPR001932 (SMART); IPR036457 (G3DSA:3.60.40.GENE3D); PF13672 (PFAM); PTHR21586 (PANTHER); PTHR21586:SF0 (PANTHER); SIGNAL_PEPTIDE_N_REGION (PHOBIUS); SIGNAL_PEPTIDE (PHOBIUS); SIGNAL_PEPTIDE_C_REGION (PHOBIUS); NON_CYTOPLASMIC_DOMAIN (PHOBIUS); SIGNAL_PEPTIDE_H_REGION (PHOBIUS); IPR001932 (PROSITE_PROFILES); IPR036457 (SUPERFAMILY)	F:GO:0003824	F:catalytic activity
TRUE	[INTERPRO, BLASTED]	scaffold_000304F_transcript_id_6671seq_length_2036	cathepsin B-like cysteine proteinase 4	2036	20	0	67.04						IPR000668 (SMART); G3DSA:3.90.70.10 (GENE3D); IPR000668 (PFAM); PTHR12411:SF15 (PANTHER); IPR013128 (PANTHER); SIGNAL_PEPTIDE_H_REGION (PHOBIUS); SIGNAL_PEPTIDE_N_REGION (PHOBIUS); NON_CYTOPLASMIC_DOMAIN (PHOBIUS); SIGNAL_PEPTIDE_C_REGION (PHOBIUS); SIGNAL_PEPTIDE (PHOBIUS); IPR038765 (SUPERFAMILY)	P:GO:0006508; F:GO:0008234	P:proteolysis; F:cysteine-type peptidase activity
TRUE	[INTERPRO, BLASTED, MAPPED]	scaffold_000784F_transcript_id_3556seq_length_2968	cytochrome b5-related protein-like	2968	20	0	66.02	7	P:GO:0006629; C:GO:0016020; C:GO:0016021; F:GO:0016491; F:GO:0020037; F:GO:0046872; P:GO:0055114	P:lipid metabolic process; C:membrane; C:integral component of membrane; F:oxidoreductase activity; F:heme binding; F:metal ion binding; P:oxidation-reduction process			IPR001199 (SMART); IPR005804 (PFAM); IPR036400 (G3DSA:3.10.120.GENE3D); IPR001199 (PFAM); PTHR16740 (PANTHER); CYTOPLASMIC_DOMAIN (PHOBIUS); TRANSMEMBRANE (PHOBIUS); CYTOPLASMIC_DOMAIN (PHOBIUS); NON_CYTOPLASMIC_DOMAIN (PHOBIUS); NON_CYTOPLASMIC_DOMAIN (PHOBIUS); TRANSMEMBRANE (PHOBIUS); CYTOPLASMIC_DOMAIN (PHOBIUS); TRANSMEMBRANE (PHOBIUS); TRANSMEMBRANE (PHOBIUS); NON_CYTOPLASMIC_DOMAIN (PHOBIU…	P:GO:0006629	P:lipid metabolic process
TRUE	[INTERPRO, BLASTED, MAPPED, GO-SLIM]	scaffold_000072F_transcript_id_16555seq_length_2289	putative fatty acyl-CoA reductase CG5065	2289	20	0	69.54	1	F:GO:0016491	F:oxidoreductase activity			G3DSA:3.40.50.720 (GENE3D); IPR013120 (PFAM); IPR033640 (PFAM); PTHR11011:SF24 (PANTHER); IPR026055 (PANTHER); cd05236 (CDD); IPR033640 (CDD); IPR036291 (SUPERFAMILY)	F:GO:0080019	F:fatty-acyl-CoA reductase (alcohol-forming) activity
TRUE	[INTERPRO, BLASTED]	scaffold_000045F_transcript_id_19505seq_length_2265	maltase A3-like	2265	20	0	72.77						IPR006047 (SMART); IPR006047 (PFAM); G3DSA:3.90.400.10 (GENE3D); IPR013780 (G3DSA:2.60.40.GENE3D); G3DSA:3.20.20.80 (GENE3D); PTHR10357:SF177 (PANTHER); PTHR10357 (PANTHER); CYTOPLASMIC_DOMAIN (PHOBIUS); TRANSMEMBRANE (PHOBIUS); NON_CYTOPLASMIC_DOMAIN (PHOBIUS); SignalP-noTM (SIGNALP_EUK); IPR017853 (SUPERFAMILY)	F:GO:0003824; P:GO:0005975	F:catalytic activity; P:carbohydrate metabolic process
TRUE	[INTERPRO, BLASTED, MAPPED, GO-SLIM]	scaffold_000043F_transcript_id_16986seq_length_1796	probable cytochrome P450 6a14	1796	20	0	66.69	1	F:GO:0016491	F:oxidoreductase activity			IPR002401 (PRINTS); IPR001128 (PRINTS); IPR001128 (PFAM); IPR036396 (G3DSA:1.10.630.GENE3D); mobidb-lite (MOBIDB_LITE); mobidb-lite (MOBIDB_LITE); PTHR24292 (PANTHER); IPR017972 (PROSITE_PATTERNS); NON_CYTOPLASMIC_DOMAIN (PHOBIUS); SIGNAL_PEPTIDE_N_REGION (PHOBIUS); SIGNAL_PEPTIDE_C_REGION (PHOBIUS); SIGNAL_PEPTIDE_H_REGION (PHOBIUS); SIGNAL_PEPTIDE (PHOBIUS); IPR036396 (SUPERFAMILY); TMhelix (TM…	F:GO:0005506; F:GO:0016705; F:GO:0020037; P:GO:0055114	F:iron ion binding; F:oxidoreductase activity, acting on paired donors, with incorporation or reduction of molecular oxygen; F:heme binding; P:oxidation-reduction process
TRUE	[INTERPRO, BLASTED, MAPPED]	scaffold_000959F_transcript_id_8406seq_length_1248	legumain-like	1248	20	0	61.91	7	F:GO:0004197; C:GO:0005615; P:GO:0006508; F:GO:0008233; C:GO:0009505; P:GO:0010214; P:GO:0012501	F:cysteine-type endopeptidase activity; C:extracellular space; P:proteolysis; F:peptidase activity; C:plant-type cell wall; P:seed coat development; P:programmed cell death			IPR001096 (PRINTS); G3DSA:3.40.50.1460 (GENE3D); IPR001096 (PIRSF); IPR001096 (PFAM); IPR001096 (PANTHER); PTHR12000:SF3 (PANTHER); SignalP-noTM (SIGNALP_EUK)	P:GO:0006508; F:GO:0008233	P:proteolysis; F:peptidase activity
TRUE	[INTERPRO, BLASTED]	scaffold_000225F_transcript_id_1644seq_length_1192	PREDICTED: uncharacterized protein LOC109041996	1192	20	1.10671e-151	61.24						G3DSA:3.40.630.30 (GENE3D); mobidb-lite (MOBIDB_LITE); mobidb-lite (MOBIDB_LITE); PTHR20905 (PANTHER); IPR016181 (SUPERFAMILY)	no GO terms	no GO terms
TRUE	[INTERPRO, BLASTED, MAPPED]	scaffold_000372F_transcript_id_2659seq_length_2547	maltase 2-like	2547	20	0	70.03	2	F:GO:0003824; P:GO:0005975	F:catalytic activity; P:carbohydrate metabolic process			IPR006047 (SMART); G3DSA:3.90.400.10 (GENE3D); G3DSA:3.20.20.80 (GENE3D); IPR006047 (PFAM); PTHR10357 (PANTHER); PTHR10357:SF177 (PANTHER); IPR017853 (SUPERFAMILY)	F:GO:0003824; P:GO:0005975	F:catalytic activity; P:carbohydrate metabolic process
TRUE	[INTERPRO, BLASTED]	scaffold_000257F_transcript_id_7492seq_length_2253	UDP-glucuronosyltransferase 2B18-like	2253	20	0	74.54						IPR002213 (PFAM); G3DSA:3.40.50.2000 (GENE3D); G3DSA:3.40.50.2000 (GENE3D); PTHR11926 (PANTHER); PTHR11926:SF151 (PANTHER); IPR035595 (PROSITE_PATTERNS); TRANSMEMBRANE (PHOBIUS); NON_CYTOPLASMIC_DOMAIN (PHOBIUS); CYTOPLASMIC_DOMAIN (PHOBIUS); CYTOPLASMIC_DOMAIN (PHOBIUS); TRANSMEMBRANE (PHOBIUS); SSF53756 (SUPERFAMILY); TMhelix (TMHMM); TMhelix (TMHMM)	P:GO:0008152; F:GO:0016758	P:metabolic process; F:transferase activity, transferring hexosyl groups
TRUE	[INTERPRO, BLASTED, MAPPED, GO-SLIM]	scaffold_000037F_transcript_id_18704seq_length_715	esterase FE4-like	715	20	8.57067e-68	74.12	1	F:GO:0003674	F:molecular_function			IPR029058 (G3DSA:3.40.50.GENE3D); IPR002018 (PFAM); PTHR11559 (PANTHER); SIGNAL_PEPTIDE_N_REGION (PHOBIUS); NON_CYTOPLASMIC_DOMAIN (PHOBIUS); SIGNAL_PEPTIDE (PHOBIUS); SIGNAL_PEPTIDE_H_REGION (PHOBIUS); SIGNAL_PEPTIDE_C_REGION (PHOBIUS); SignalP-noTM (SIGNALP_EUK); IPR029058 (SUPERFAMILY)	no GO terms	no GO terms
TRUE	[INTERPRO, BLASTED, MAPPED, GO-SLIM]	scaffold_000117F_transcript_id_15461seq_length_2779	hexokinase-1-like	2779	20	0	76.97	10	C:GO:0005623; P:GO:0005975; P:GO:0006091; P:GO:0009058; F:GO:0016301; P:GO:0034655; P:GO:0042592; F:GO:0043167; P:GO:0044281; P:GO:0051186	C:cell; P:carbohydrate metabolic process; P:generation of precursor metabolites and energy; P:biosynthetic process; F:kinase activity; P:nucleobase-containing compound catabolic process; P:homeostatic process; F:ion binding; P:small molecule metabolic process; P:cofactor metabolic process	EC:2.7.1.1	Hexokinase	PR00475 (PRINTS); IPR022672 (PFAM); G3DSA:3.40.367.20 (GENE3D); G3DSA:3.30.420.40 (GENE3D); IPR022673 (PFAM); IPR001312 (PANTHER); PTHR19443:SF53 (PANTHER); IPR019807 (PROSITE_PATTERNS); IPR001312 (PROSITE_PROFILES); cd00012 (CDD); SSF53067 (SUPERFAMILY); SSF53067 (SUPERFAMILY)	P:GO:0001678; F:GO:0004396; F:GO:0005524; F:GO:0005536; P:GO:0005975; P:GO:0006096; F:GO:0016773	P:cellular glucose homeostasis; F:hexokinase activity; F:ATP binding; F:glucose binding; P:carbohydrate metabolic process; P:glycolytic process; F:phosphotransferase activity, alcohol group as acceptor
TRUE	[INTERPRO, BLASTED]	scaffold_000022F_transcript_id_21636seq_length_1732	UDP-glucuronosyltransferase 2B18-like	1732	20	0	73.82						G3DSA:3.40.50.2000 (GENE3D); G3DSA:3.40.50.2000 (GENE3D); IPR002213 (PFAM); PTHR11926 (PANTHER); PTHR11926:SF151 (PANTHER); IPR035595 (PROSITE_PATTERNS); SIGNAL_PEPTIDE (PHOBIUS); TRANSMEMBRANE (PHOBIUS); CYTOPLASMIC_DOMAIN (PHOBIUS); SIGNAL_PEPTIDE_C_REGION (PHOBIUS); SIGNAL_PEPTIDE_N_REGION (PHOBIUS); NON_CYTOPLASMIC_DOMAIN (PHOBIUS); SIGNAL_PEPTIDE_H_REGION (PHOBIUS); SignalP-noTM (SIGNALP_EUK…	P:GO:0008152; F:GO:0016758	P:metabolic process; F:transferase activity, transferring hexosyl groups
TRUE	[INTERPRO, BLASTED, MAPPED]	scaffold_000041F_transcript_id_19768seq_length_2068	sulfide:quinone oxidoreductase, mitochondrial	2068	20	0	71.11	2	F:GO:0016491; P:GO:0055114	F:oxidoreductase activity; P:oxidation-reduction process			PR00368 (PRINTS); IPR023753 (PFAM); IPR036188 (G3DSA:3.50.50.GENE3D); IPR036188 (G3DSA:3.50.50.GENE3D); PTHR10632:SF2 (PANTHER); IPR015904 (PANTHER); IPR036188 (SUPERFAMILY); IPR036188 (SUPERFAMILY)	F:GO:0016491; P:GO:0055114	F:oxidoreductase activity; P:oxidation-reduction process
TRUE	[INTERPRO, BLASTED, MAPPED, GO-SLIM]	scaffold_000006F_transcript_id_25490seq_length_1831	IQ and AAA domain-containing protein 1	1831	20	0	85.35	1	F:GO:0043167	F:ion binding			G3DSA:3.40.50.300 (GENE3D); IPR003959 (PFAM); G3DSA:1.10.8.60 (GENE3D); mobidb-lite (MOBIDB_LITE); PTHR14690 (PANTHER); cd00009 (CDD); IPR027417 (SUPERFAMILY)	F:GO:0005524	F:ATP binding
TRUE	[INTERPRO, BLASTED, MAPPED, GO-SLIM]	scaffold_000040F_transcript_id_19663seq_length_2372	sodium-independent sulfate anion transporter	2372	20	0	82.38	2	C:GO:0005575; F:GO:0022857	C:cellular_component; F:transmembrane transporter activity			IPR002645 (PFAM); IPR036513 (G3DSA:3.30.750.GENE3D); IPR011547 (PFAM); mobidb-lite (MOBIDB_LITE); PTHR11814:SF74 (PANTHER); IPR001902 (PANTHER); TRANSMEMBRANE (PHOBIUS); NON_CYTOPLASMIC_DOMAIN (PHOBIUS); NON_CYTOPLASMIC_DOMAIN (PHOBIUS); NON_CYTOPLASMIC_DOMAIN (PHOBIUS); CYTOPLASMIC_DOMAIN (PHOBIUS); TRANSMEMBRANE (PHOBIUS); TRANSMEMBRANE (PHOBIUS); CYTOPLASMIC_DOMAIN (PHOBIUS); TRANSMEMBRANE (PH…	F:GO:0008271; P:GO:0008272; F:GO:0015116; C:GO:0016020; C:GO:0016021; P:GO:0055085	F:secondary active sulfate transmembrane transporter activity; P:sulfate transport; F:sulfate transmembrane transporter activity; C:membrane; C:integral component of membrane; P:transmembrane transport
TRUE	[INTERPRO, BLASTED, MAPPED]	scaffold_000045F_transcript_id_19105seq_length_2003	facilitated trehalose transporter Tret1-2 homolog	2003	20	0	65.66	6	F:GO:0005215; P:GO:0008643; C:GO:0016020; C:GO:0016021; F:GO:0022857; P:GO:0055085	F:transporter activity; P:carbohydrate transport; C:membrane; C:integral component of membrane; F:transmembrane transporter activity; P:transmembrane transport			G3DSA:1.20.1250.20 (GENE3D); IPR005828 (PFAM); PTHR23500 (PANTHER); PTHR23500:SF11 (PANTHER); TRANSMEMBRANE (PHOBIUS); CYTOPLASMIC_DOMAIN (PHOBIUS); CYTOPLASMIC_DOMAIN (PHOBIUS); NON_CYTOPLASMIC_DOMAIN (PHOBIUS); TRANSMEMBRANE (PHOBIUS); TRANSMEMBRANE (PHOBIUS); NON_CYTOPLASMIC_DOMAIN (PHOBIUS); TRANSMEMBRANE (PHOBIUS); NON_CYTOPLASMIC_DOMAIN (PHOBIUS); TRANSMEMBRANE (PHOBIUS); CYTOPLASMIC_DOMAIN…	C:GO:0016021; F:GO:0022857; P:GO:0055085	C:integral component of membrane; F:transmembrane transporter activity; P:transmembrane transport
TRUE	[INTERPRO, BLASTED, MAPPED, GO-SLIM]	scaffold_000902F_transcript_id_4052seq_length_578	neuronal calcium sensor 2	578	20	1.57032e-56	97.46	1	F:GO:0043167	F:ion binding			PR00450 (PRINTS); G3DSA:1.10.238.10 (GENE3D); IPR002048 (PFAM); PTHR23055:SF69 (PANTHER); PTHR23055 (PANTHER); IPR002048 (PROSITE_PROFILES); IPR011992 (SUPERFAMILY)	F:GO:0005509	F:calcium ion binding
TRUE	[INTERPRO, BLASTED, MAPPED]	scaffold_000456F_transcript_id_7258seq_length_2582	venom carboxylesterase-6-like	2582	20	0	65.17	2	P:GO:0008152; F:GO:0016787	P:metabolic process; F:hydrolase activity			IPR029058 (G3DSA:3.40.50.GENE3D); IPR002018 (PFAM); PTHR11559 (PANTHER); PTHR11559:SF347 (PANTHER); IPR019826 (PROSITE_PATTERNS); SIGNAL_PEPTIDE_H_REGION (PHOBIUS); SIGNAL_PEPTIDE_N_REGION (PHOBIUS); SIGNAL_PEPTIDE (PHOBIUS); NON_CYTOPLASMIC_DOMAIN (PHOBIUS); SIGNAL_PEPTIDE_C_REGION (PHOBIUS); cd00312 (CDD); SignalP-noTM (SIGNALP_EUK); IPR029058 (SUPERFAMILY)	no GO terms	no GO terms
TRUE	[INTERPRO, BLASTED, MAPPED]	scaffold_000035F_transcript_id_20079seq_length_1181	Zinc transporter ZIP1	1181	20	0	57.54	5	C:GO:0016020; C:GO:0016021; P:GO:0030001; F:GO:0046873; P:GO:0055085	C:membrane; C:integral component of membrane; P:metal ion transport; F:metal ion transmembrane transporter activity; P:transmembrane transport			IPR003689 (PFAM); mobidb-lite (MOBIDB_LITE); mobidb-lite (MOBIDB_LITE); PTHR11040:SF80 (PANTHER); PTHR11040 (PANTHER); TRANSMEMBRANE (PHOBIUS); TRANSMEMBRANE (PHOBIUS); NON_CYTOPLASMIC_DOMAIN (PHOBIUS); NON_CYTOPLASMIC_DOMAIN (PHOBIUS); TRANSMEMBRANE (PHOBIUS); TRANSMEMBRANE (PHOBIUS); CYTOPLASMIC_DOMAIN (PHOBIUS); TRANSMEMBRANE (PHOBIUS); CYTOPLASMIC_DOMAIN (PHOBIUS); TRANSMEMBRANE (PHOBIUS); NO…	C:GO:0016020; P:GO:0030001; F:GO:0046873; P:GO:0055085	C:membrane; P:metal ion transport; F:metal ion transmembrane transporter activity; P:transmembrane transport
TRUE	[INTERPRO, BLASTED, MAPPED]	scaffold_000087F_transcript_id_9960seq_length_1686	putative serine protease K12H4.7	1686	20	0	66.69	3	P:GO:0006508; F:GO:0008233; F:GO:0008236	P:proteolysis; F:peptidase activity; F:serine-type peptidase activity			G3DSA:1.20.120.980 (GENE3D); IPR008758 (PFAM); IPR029058 (G3DSA:3.40.50.GENE3D); PTHR11010 (PANTHER); PTHR11010:SF11 (PANTHER); SIGNAL_PEPTIDE_N_REGION (PHOBIUS); SIGNAL_PEPTIDE_C_REGION (PHOBIUS); NON_CYTOPLASMIC_DOMAIN (PHOBIUS); SIGNAL_PEPTIDE_H_REGION (PHOBIUS); SIGNAL_PEPTIDE (PHOBIUS); SignalP-TM (SIGNALP_EUK); IPR029058 (SUPERFAMILY)	P:GO:0006508; F:GO:0008236	P:proteolysis; F:serine-type peptidase activity
TRUE	[INTERPRO, BLASTED, MAPPED]	scaffold_000030F_transcript_id_22622seq_length_1569	putative cysteine proteinase CG12163	1569	20	0	65.91	6	F:GO:0004869; P:GO:0006508; F:GO:0008233; F:GO:0008234; P:GO:0010951; F:GO:0016787	F:cysteine-type endopeptidase inhibitor activity; P:proteolysis; F:peptidase activity; F:cysteine-type peptidase activity; P:negative regulation of endopeptidase activity; F:hydrolase activity			Coil (COILS); IPR000668 (PRINTS); IPR000668 (SMART); IPR013201 (SMART); G3DSA:3.90.70.10 (GENE3D); IPR000668 (PFAM); IPR013201 (PFAM); PTHR12411:SF444 (PANTHER); IPR013128 (PANTHER); IPR025660 (PROSITE_PATTERNS); IPR000169 (PROSITE_PATTERNS); SIGNAL_PEPTIDE_H_REGION (PHOBIUS); SIGNAL_PEPTIDE_C_REGION (PHOBIUS); SIGNAL_PEPTIDE_N_REGION (PHOBIUS); SIGNAL_PEPTIDE (PHOBIUS); NON_CYTOPLASMIC_DOMAIN (P…	P:GO:0006508; F:GO:0008234	P:proteolysis; F:cysteine-type peptidase activity
TRUE	[INTERPRO, BLASTED, MAPPED, GO-SLIM]	scaffold_000252F_transcript_id_12008seq_length_1454	GTP-binding nuclear protein Ran	1454	20	9.57856e-155	97.9	4	F:GO:0003924; C:GO:0005634; P:GO:0006913; F:GO:0043167	F:GTPase activity; C:nucleus; P:nucleocytoplasmic transport; F:ion binding	EC:3.6.1.15	Nucleoside-triphosphate phosphatase	IPR002041 (PRINTS); SM00173 (SMART); SM00174 (SMART); SM00176 (SMART); SM00175 (SMART); IPR005225 (TIGRFAM); G3DSA:3.40.50.300 (GENE3D); IPR001806 (PFAM); IPR002041 (PANTHER); PTHR24071:SF15 (PANTHER); IPR002041 (PROSITE_PROFILES); cd00877 (CDD); IPR027417 (SUPERFAMILY)	F:GO:0003924; F:GO:0005525; P:GO:0006913	F:GTPase activity; F:GTP binding; P:nucleocytoplasmic transport
TRUE	[INTERPRO, BLASTED, MAPPED, GO-SLIM]	scaffold_000007F_transcript_id_25453seq_length_999	putative sulfiredoxin	999	20	4.18861e-123	84.42	2	F:GO:0016491; F:GO:0043167	F:oxidoreductase activity; F:ion binding	EC:1.8.98.2	Sulfiredoxin	IPR003115 (PFAM); G3DSA:3.90.1530.10 (GENE3D); IPR016692 (PIRSF); IPR016692 (PANTHER); cd16395 (CDD); IPR036086 (SUPERFAMILY)	F:GO:0032542; P:GO:0055114	F:sulfiredoxin activity; P:oxidation-reduction process
TRUE	[INTERPRO, BLASTED, MAPPED, GO-SLIM]	scaffold_000491F_transcript_id_3873seq_length_2789	esterase FE4-like	2789	20	0	77.37	1	F:GO:0003674	F:molecular_function			IPR002018 (PFAM); IPR029058 (G3DSA:3.40.50.GENE3D); PTHR11559:SF348 (PANTHER); PTHR11559 (PANTHER); IPR019826 (PROSITE_PATTERNS); NON_CYTOPLASMIC_DOMAIN (PHOBIUS); CYTOPLASMIC_DOMAIN (PHOBIUS); TRANSMEMBRANE (PHOBIUS); IPR029058 (SUPERFAMILY)	no GO terms	no GO terms
TRUE	[INTERPRO, BLASTED, MAPPED, GO-SLIM]	scaffold_000022F_transcript_id_21626seq_length_1814	apolipoprotein D-like	1814	20	1.34205e-140	79.71	3	P:GO:0006810; P:GO:0007568; F:GO:0008289	P:transport; P:aging; F:lipid binding			IPR002969 (PRINTS); IPR000566 (PFAM); IPR012674 (G3DSA:2.40.128.GENE3D); IPR022271 (PIRSF); PTHR10612 (PANTHER); PTHR10612:SF21 (PANTHER); IPR022272 (PROSITE_PATTERNS); NON_CYTOPLASMIC_DOMAIN (PHOBIUS); SIGNAL_PEPTIDE_C_REGION (PHOBIUS); SIGNAL_PEPTIDE (PHOBIUS); SIGNAL_PEPTIDE_N_REGION (PHOBIUS); SIGNAL_PEPTIDE_H_REGION (PHOBIUS); SignalP-noTM (SIGNALP_EUK); SignalP-noTM (SIGNALP_GRAM_NEGATIVE);…	P:GO:0006869; P:GO:0007568; F:GO:0008289	P:lipid transport; P:aging; F:lipid binding
TRUE	[INTERPRO, BLASTED, MAPPED, GO-SLIM]	scaffold_000185F_transcript_id_6462seq_length_2030	cyclin-dependent kinase 14 isoform X2	2030	20	1.04846e-20	71.03	1	F:GO:0016301	F:kinase activity			no IPS match	no IPS match	no IPS match
TRUE	[INTERPRO, BLASTED, MAPPED, GO-SLIM]	scaffold_000079F_transcript_id_14854seq_length_2094	cytochrome P450	2094	20	1.40454e-161	70.09	3	C:GO:0005575; F:GO:0016491; F:GO:0043167	C:cellular_component; F:oxidoreductase activity; F:ion binding			Coil (COILS); IPR002401 (PRINTS); IPR001128 (PRINTS); IPR036396 (G3DSA:1.10.630.GENE3D); IPR001128 (PFAM); PTHR24292 (PANTHER); IPR017972 (PROSITE_PATTERNS); IPR036396 (SUPERFAMILY)	F:GO:0005506; F:GO:0016705; F:GO:0020037; P:GO:0055114	F:iron ion binding; F:oxidoreductase activity, acting on paired donors, with incorporation or reduction of molecular oxygen; F:heme binding; P:oxidation-reduction process
TRUE	[INTERPRO, BLASTED]	scaffold_000283F_transcript_id_3703seq_length_3254	UDP-glucuronosyltransferase 2B7-like isoform X3	3254	20	0	78.64						IPR002213 (PFAM); G3DSA:3.40.50.2000 (GENE3D); PTHR11926 (PANTHER); PTHR11926:SF151 (PANTHER); IPR035595 (PROSITE_PATTERNS); SIGNAL_PEPTIDE_N_REGION (PHOBIUS); SIGNAL_PEPTIDE_C_REGION (PHOBIUS); NON_CYTOPLASMIC_DOMAIN (PHOBIUS); SIGNAL_PEPTIDE_H_REGION (PHOBIUS); CYTOPLASMIC_DOMAIN (PHOBIUS); SIGNAL_PEPTIDE (PHOBIUS); TRANSMEMBRANE (PHOBIUS); SignalP-noTM (SIGNALP_EUK); SSF53756 (SUPERFAMILY); TM…	P:GO:0008152; F:GO:0016758	P:metabolic process; F:transferase activity, transferring hexosyl groups
TRUE	[INTERPRO, BLASTED]	scaffold_000002F_transcript_id_24908seq_length_3481	CCAAT/enhancer-binding protein zeta	3481	20	0	63.67						Coil (COILS); IPR032682 (PFAM); IPR005612 (PFAM); mobidb-lite (MOBIDB_LITE); mobidb-lite (MOBIDB_LITE); PTHR12048 (PANTHER); NON_CYTOPLASMIC_DOMAIN (PHOBIUS); CYTOPLASMIC_DOMAIN (PHOBIUS); NON_CYTOPLASMIC_DOMAIN (PHOBIUS); TRANSMEMBRANE (PHOBIUS); TRANSMEMBRANE (PHOBIUS); IPR016024 (SUPERFAMILY)	F:GO:0005488	F:binding
TRUE	[INTERPRO, BLASTED]	scaffold_000010F_transcript_id_23242seq_length_3052	maltase A3-like	3052	20	0	71.09						IPR006047 (SMART); G3DSA:3.20.20.80 (GENE3D); G3DSA:3.90.400.10 (GENE3D); IPR006047 (PFAM); mobidb-lite (MOBIDB_LITE); PTHR10357 (PANTHER); PTHR10357:SF177 (PANTHER); TRANSMEMBRANE (PHOBIUS); CYTOPLASMIC_DOMAIN (PHOBIUS); TRANSMEMBRANE (PHOBIUS); CYTOPLASMIC_DOMAIN (PHOBIUS); TRANSMEMBRANE (PHOBIUS); NON_CYTOPLASMIC_DOMAIN (PHOBIUS); NON_CYTOPLASMIC_DOMAIN (PHOBIUS); cd11328 (CDD); IPR017853 (SUP…	F:GO:0003824; P:GO:0005975	F:catalytic activity; P:carbohydrate metabolic process
TRUE	[INTERPRO, BLASTED, MAPPED]	scaffold_000109F_transcript_id_5554seq_length_755	proton-coupled amino acid transporter-like protein CG1139	755	20	1.66039e-153	70.45	2	C:GO:0016020; C:GO:0016021	C:membrane; C:integral component of membrane			IPR013057 (PFAM); PTHR22950:SF340 (PANTHER); PTHR22950 (PANTHER); NON_CYTOPLASMIC_DOMAIN (PHOBIUS); TRANSMEMBRANE (PHOBIUS); CYTOPLASMIC_DOMAIN (PHOBIUS); CYTOPLASMIC_DOMAIN (PHOBIUS); CYTOPLASMIC_DOMAIN (PHOBIUS); TRANSMEMBRANE (PHOBIUS); TRANSMEMBRANE (PHOBIUS); TRANSMEMBRANE (PHOBIUS); CYTOPLASMIC_DOMAIN (PHOBIUS); NON_CYTOPLASMIC_DOMAIN (PHOBIUS); TRANSMEMBRANE (PHOBIUS); NON_CYTOPLASMIC_DOMA…	no GO terms	no GO terms
TRUE	[INTERPRO, BLASTED, MAPPED, GO-SLIM]	scaffold_000019F_transcript_id_23131seq_length_2253	apolipoprotein D-like	2253	20	2.96527e-139	79.71	3	P:GO:0006810; P:GO:0007568; F:GO:0008289	P:transport; P:aging; F:lipid binding			IPR002969 (PRINTS); IPR000566 (PFAM); IPR012674 (G3DSA:2.40.128.GENE3D); IPR022271 (PIRSF); PTHR10612:SF21 (PANTHER); PTHR10612 (PANTHER); IPR022272 (PROSITE_PATTERNS); SIGNAL_PEPTIDE (PHOBIUS); SIGNAL_PEPTIDE_N_REGION (PHOBIUS); SIGNAL_PEPTIDE_H_REGION (PHOBIUS); SIGNAL_PEPTIDE_C_REGION (PHOBIUS); NON_CYTOPLASMIC_DOMAIN (PHOBIUS); SignalP-noTM (SIGNALP_EUK); SignalP-noTM (SIGNALP_GRAM_NEGATIVE);…	P:GO:0006869; P:GO:0007568; F:GO:0008289	P:lipid transport; P:aging; F:lipid binding
TRUE	[INTERPRO, BLASTED]	scaffold_000002F_transcript_id_W4VRA2.1seq_length_11679	spectrin beta chain, non-erythrocytic 1 isoform X1	11679	20	0	85.16						Coil (COILS); Coil (COILS); Coil (COILS); Coil (COILS); Coil (COILS); Coil (COILS); Coil (COILS); Coil (COILS); Coil (COILS); Coil (COILS); Coil (COILS); Coil (COILS); Coil (COILS); Coil (COILS); Coil (COILS); Coil (COILS); Coil (COILS); Coil (COILS); Coil (COILS); Coil (COILS); Coil (COILS); IPR001605 (PRINTS); IPR018159 (SMART); IPR001715 (SMART); IPR001452 (SMART); IPR001849 (SMART); IPR002017…	F:GO:0005515; F:GO:0005543	F:protein binding; F:phospholipid binding
TRUE	[INTERPRO, BLASTED, MAPPED, GO-SLIM]	scaffold_000176F_transcript_id_11595seq_length_3651-1	beta-hexosaminidase subunit beta-like	3651	20	0	62.44	1	F:GO:0016798	F:hydrolase activity, acting on glycosyl bonds			IPR025705 (PRINTS); IPR015883 (PFAM); G3DSA:3.20.20.80 (GENE3D); IPR025705 (PIRSF); IPR029018 (G3DSA:3.30.379.GENE3D); IPR029019 (PFAM); mobidb-lite (MOBIDB_LITE); mobidb-lite (MOBIDB_LITE); mobidb-lite (MOBIDB_LITE); PTHR22600 (PANTHER); PTHR22600:SF20 (PANTHER); CYTOPLASMIC_DOMAIN (PHOBIUS); TRANSMEMBRANE (PHOBIUS); NON_CYTOPLASMIC_DOMAIN (PHOBIUS); cd06562 (CDD); IPR017853 (SUPERFAMILY); IPR02…	F:GO:0004553; F:GO:0004563; P:GO:0005975	F:hydrolase activity, hydrolyzing O-glycosyl compounds; F:beta-N-acetylhexosaminidase activity; P:carbohydrate metabolic process
TRUE	[INTERPRO, BLASTED]	scaffold_000199F_transcript_id_10539seq_length_2150	maltase A3-like	2150	20	0	76.09						IPR006047 (SMART); G3DSA:3.90.400.10 (GENE3D); IPR006047 (PFAM); G3DSA:3.20.20.80 (GENE3D); PTHR10357:SF177 (PANTHER); PTHR10357 (PANTHER); TRANSMEMBRANE (PHOBIUS); SIGNAL_PEPTIDE (PHOBIUS); SIGNAL_PEPTIDE_H_REGION (PHOBIUS); SIGNAL_PEPTIDE_C_REGION (PHOBIUS); NON_CYTOPLASMIC_DOMAIN (PHOBIUS); CYTOPLASMIC_DOMAIN (PHOBIUS); SIGNAL_PEPTIDE_N_REGION (PHOBIUS); SignalP-noTM (SIGNALP_EUK); IPR017853 (…	F:GO:0003824; P:GO:0005975	F:catalytic activity; P:carbohydrate metabolic process
TRUE	[INTERPRO, BLASTED, MAPPED, GO-SLIM]	scaffold_000037F_transcript_id_19668seq_length_1386	aspartate aminotransferase, cytoplasmic	1386	20	9.01225e-129	68.39	1	F:GO:0003674	F:molecular_function			IPR004839 (PFAM); IPR015421 (G3DSA:3.40.640.GENE3D); IPR000796 (PANTHER); PTHR11879:SF3 (PANTHER); IPR015424 (SUPERFAMILY)	F:GO:0003824; P:GO:0006520; F:GO:0008483; P:GO:0009058; F:GO:0030170	F:catalytic activity; P:cellular amino acid metabolic process; F:transaminase activity; P:biosynthetic process; F:pyridoxal phosphate binding
TRUE	[INTERPRO, BLASTED, MAPPED, GO-SLIM]	scaffold_000173F_transcript_id_7249seq_length_1617	delta(7)-sterol 5(6)-desaturase erg32-like	1617	20	0	68.35	2	C:GO:0005575; P:GO:0008150	C:cellular_component; P:biological_process			IPR006694 (PFAM); PTHR11863 (PANTHER); PTHR11863:SF63 (PANTHER); CYTOPLASMIC_DOMAIN (PHOBIUS); NON_CYTOPLASMIC_DOMAIN (PHOBIUS); NON_CYTOPLASMIC_DOMAIN (PHOBIUS); TRANSMEMBRANE (PHOBIUS); TRANSMEMBRANE (PHOBIUS); CYTOPLASMIC_DOMAIN (PHOBIUS); TRANSMEMBRANE (PHOBIUS); TRANSMEMBRANE (PHOBIUS); NON_CYTOPLASMIC_DOMAIN (PHOBIUS); CYTOPLASMIC_DOMAIN (PHOBIUS); TRANSMEMBRANE (PHOBIUS); TMhelix (TMHMM); …	F:GO:0005506; P:GO:0008610; F:GO:0016491; P:GO:0055114	F:iron ion binding; P:lipid biosynthetic process; F:oxidoreductase activity; P:oxidation-reduction process
TRUE	[INTERPRO, BLASTED, MAPPED, GO-SLIM]	scaffold_000000F_transcript_id_27025seq_length_5285	filamentous growth regulator 23	5285	20	0	74.98	3	F:GO:0003674; C:GO:0005576; P:GO:0008150	F:molecular_function; C:extracellular region; P:biological_process			Coil (COILS); IPR002557 (SMART); G3DSA:2.170.140.10 (GENE3D); IPR002557 (PFAM); mobidb-lite (MOBIDB_LITE); mobidb-lite (MOBIDB_LITE); mobidb-lite (MOBIDB_LITE); mobidb-lite (MOBIDB_LITE); PTHR22933:SF2 (PANTHER); PTHR22933 (PANTHER); SIGNAL_PEPTIDE_C_REGION (PHOBIUS); SIGNAL_PEPTIDE (PHOBIUS); SIGNAL_PEPTIDE_N_REGION (PHOBIUS); SIGNAL_PEPTIDE_H_REGION (PHOBIUS); NON_CYTOPLASMIC_DOMAIN (PHOBIUS); …	C:GO:0005576; P:GO:0006030; F:GO:0008061	C:extracellular region; P:chitin metabolic process; F:chitin binding
TRUE	[INTERPRO, BLASTED, MAPPED, GO-SLIM]	scaffold_000062F_transcript_id_20006seq_length_1919	3-hydroxyisobutyrate dehydrogenase, mitochondrial	1919	20	0	72.56	3	P:GO:0006520; P:GO:0009056; F:GO:0016491	P:cellular amino acid metabolic process; P:catabolic process; F:oxidoreductase activity			IPR015815 (PIRSF); IPR011548 (TIGRFAM); IPR006115 (PFAM); IPR013328 (G3DSA:1.10.1040.GENE3D); IPR029154 (PFAM); G3DSA:3.40.50.720 (GENE3D); PTHR22981 (PANTHER); PTHR22981:SF7 (PANTHER); IPR002204 (PROSITE_PATTERNS); IPR008927 (SUPERFAMILY); IPR036291 (SUPERFAMILY)	F:GO:0008442; F:GO:0016491; F:GO:0050661; F:GO:0051287; P:GO:0055114	F:3-hydroxyisobutyrate dehydrogenase activity; F:oxidoreductase activity; F:NADP binding; F:NAD binding; P:oxidation-reduction process
TRUE	[INTERPRO, BLASTED, MAPPED]	scaffold_000233F_transcript_id_14191seq_length_3041	facilitated trehalose transporter Tret1-like	3041	20	0	64.35	6	F:GO:0005215; P:GO:0008643; C:GO:0016020; C:GO:0016021; F:GO:0022857; P:GO:0055085	F:transporter activity; P:carbohydrate transport; C:membrane; C:integral component of membrane; F:transmembrane transporter activity; P:transmembrane transport			IPR005828 (PFAM); G3DSA:1.20.1250.20 (GENE3D); PTHR23500 (PANTHER); PTHR23500:SF37 (PANTHER); IPR005829 (PROSITE_PATTERNS); IPR005829 (PROSITE_PATTERNS); TRANSMEMBRANE (PHOBIUS); TRANSMEMBRANE (PHOBIUS); NON_CYTOPLASMIC_DOMAIN (PHOBIUS); TRANSMEMBRANE (PHOBIUS); TRANSMEMBRANE (PHOBIUS); CYTOPLASMIC_DOMAIN (PHOBIUS); CYTOPLASMIC_DOMAIN (PHOBIUS); CYTOPLASMIC_DOMAIN (PHOBIUS); TRANSMEMBRANE (PHOBIU…	F:GO:0005215; C:GO:0016021; F:GO:0022857; P:GO:0055085	F:transporter activity; C:integral component of membrane; F:transmembrane transporter activity; P:transmembrane transport
TRUE	[INTERPRO, BLASTED, MAPPED]	scaffold_000034F_transcript_id_19722seq_length_5118	transient receptor potential channel pyrexia-like	5118	20	0	53.86	6	F:GO:0005216; P:GO:0006811; C:GO:0016020; C:GO:0016021; P:GO:0034220; P:GO:0055085	F:ion channel activity; P:ion transport; C:membrane; C:integral component of membrane; P:ion transmembrane transport; P:transmembrane transport			IPR002110 (SMART); IPR005821 (PFAM); IPR020683 (PFAM); IPR036770 (G3DSA:1.25.40.GENE3D); IPR036770 (G3DSA:1.25.40.GENE3D); IPR036770 (G3DSA:1.25.40.GENE3D); IPR036770 (G3DSA:1.25.40.GENE3D); IPR036770 (G3DSA:1.25.40.GENE3D); mobidb-lite (MOBIDB_LITE); mobidb-lite (MOBIDB_LITE); IPR030288 (PANTHER); NON_CYTOPLASMIC_DOMAIN (PHOBIUS); CYTOPLASMIC_DOMAIN (PHOBIUS); NON_CYTOPLASMIC_DOMAIN (PHOBIUS); C…	F:GO:0005216; F:GO:0005515; P:GO:0006811; C:GO:0016020; C:GO:0016021; P:GO:0034220; P:GO:0055085	F:ion channel activity; F:protein binding; P:ion transport; C:membrane; C:integral component of membrane; P:ion transmembrane transport; P:transmembrane transport
TRUE	[INTERPRO, BLASTED]	scaffold_000123F_transcript_id_13330seq_length_2136	Ankyrin repeat domain protein	2136	20	0	67.81						IPR002110 (PRINTS); IPR002110 (SMART); IPR036770 (G3DSA:1.25.40.GENE3D); IPR002110 (PFAM); IPR036770 (G3DSA:1.25.40.GENE3D); IPR036770 (G3DSA:1.25.40.GENE3D); IPR036770 (G3DSA:1.25.40.GENE3D); IPR036770 (G3DSA:1.25.40.GENE3D); IPR002110 (PFAM); IPR036770 (G3DSA:1.25.40.GENE3D); IPR020683 (PFAM); PTHR44294 (PANTHER); IPR002110 (PROSITE_PROFILES); IPR002110 (PROSITE_PROFILES); IPR002110 (PROSITE_PR…	F:GO:0005515	F:protein binding
TRUE	[INTERPRO, BLASTED]	scaffold_000000F_transcript_id_26850seq_length_3858	adenylate cyclase type 6	3858	20	0	71.72						Coil (COILS); IPR001054 (SMART); IPR029787 (G3DSA:3.30.70.GENE3D); IPR009398 (PFAM); IPR032628 (PFAM); IPR029787 (G3DSA:3.30.70.GENE3D); IPR001054 (PFAM); IPR030672 (PIRSF); mobidb-lite (MOBIDB_LITE); mobidb-lite (MOBIDB_LITE); mobidb-lite (MOBIDB_LITE); PTHR11920 (PANTHER); PTHR11920:SF444 (PANTHER); IPR018297 (PROSITE_PATTERNS); IPR018297 (PROSITE_PATTERNS); TRANSMEMBRANE (PHOBIUS); CYTOPLASMIC…	F:GO:0004016; C:GO:0005886; P:GO:0006171; P:GO:0009190; F:GO:0016849; P:GO:0035556	F:adenylate cyclase activity; C:plasma membrane; P:cAMP biosynthetic process; P:cyclic nucleotide biosynthetic process; F:phosphorus-oxygen lyase activity; P:intracellular signal transduction
TRUE	[INTERPRO, BLASTED, MAPPED, GO-SLIM]	scaffold_000120F_transcript_id_14200seq_length_3068	probable cation-transporting ATPase 13A3 isoform X1	3068	20	0	71.66	1	F:GO:0003674	F:molecular_function			PR00121 (PRINTS); PR00119 (PRINTS); IPR023214 (G3DSA:3.40.50.GENE3D); PF00122 (PFAM); IPR001757 (TIGRFAM); IPR023299 (G3DSA:3.40.1110.GENE3D); IPR006544 (TIGRFAM); G3DSA:1.20.1110.10 (GENE3D); PF00702 (PFAM),SFLDG00002 (SFLD),SFLDF00027 (SFLD); PTHR24093:SF373 (PANTHER); PTHR24093 (PANTHER); IPR018303 (PROSITE_PATTERNS); NON_CYTOPLASMIC_DOMAIN (PHOBIUS); TRANSMEMBRANE (PHOBIUS); TRANSMEMBRANE (PH…	F:GO:0000166; P:GO:0006812; C:GO:0016021; F:GO:0016887	F:nucleotide binding; P:cation transport; C:integral component of membrane; F:ATPase activity
TRUE	[INTERPRO, BLASTED, MAPPED, GO-SLIM]	scaffold_000346F_transcript_id_6374seq_length_1533	high affinity copper uptake protein 1 isoform X2	1533	20	4.55297e-105	86.48	2	C:GO:0005575; F:GO:0022857	C:cellular_component; F:transmembrane transporter activity			IPR007274 (PFAM); mobidb-lite (MOBIDB_LITE); PTHR12483:SF22 (PANTHER); IPR007274 (PANTHER); TRANSMEMBRANE (PHOBIUS); CYTOPLASMIC_DOMAIN (PHOBIUS); CYTOPLASMIC_DOMAIN (PHOBIUS); TRANSMEMBRANE (PHOBIUS); TRANSMEMBRANE (PHOBIUS); NON_CYTOPLASMIC_DOMAIN (PHOBIUS); NON_CYTOPLASMIC_DOMAIN (PHOBIUS); TMhelix (TMHMM); TMhelix (TMHMM); TMhelix (TMHMM)	F:GO:0005375; C:GO:0016021; P:GO:0035434	F:copper ion transmembrane transporter activity; C:integral component of membrane; P:copper ion transmembrane transport
TRUE	[INTERPRO, BLASTED, MAPPED]	scaffold_000354F_transcript_id_13753seq_length_3231	ankyrin-1-like isoform X1	3231	20	0	58.34	2	F:GO:0004842; P:GO:0016567	F:ubiquitin-protein transferase activity; P:protein ubiquitination			IPR002110 (PRINTS); IPR002110 (SMART); IPR036770 (G3DSA:1.25.40.GENE3D); IPR036770 (G3DSA:1.25.40.GENE3D); IPR036770 (G3DSA:1.25.40.GENE3D); IPR002110 (PFAM); PF13857 (PFAM); IPR036770 (G3DSA:1.25.40.GENE3D); IPR036770 (G3DSA:1.25.40.GENE3D); IPR020683 (PFAM); PF13637 (PFAM); IPR036770 (G3DSA:1.25.40.GENE3D); PTHR43928 (PANTHER); IPR020683 (PROSITE_PROFILES); IPR002110 (PROSITE_PROFILES); IPR0021…	F:GO:0005515	F:protein binding
TRUE	[INTERPRO, BLASTED, MAPPED, GO-SLIM]	scaffold_000555F_transcript_id_10518seq_length_1302	ribonuclease UK114	1302	20	1.14609e-82	77.35	1	C:GO:0005622	C:intracellular			IPR006056 (TIGRFAM); IPR006175 (PFAM); IPR035959 (G3DSA:3.30.1330.GENE3D); PTHR11803:SF33 (PANTHER); IPR006175 (PANTHER); IPR019897 (PROSITE_PATTERNS); cd00448 (CDD); IPR035959 (SUPERFAMILY)	no GO terms	no GO terms
TRUE	[INTERPRO, BLASTED, MAPPED, GO-SLIM]	scaffold_000006F_transcript_id_26080seq_length_3798	endoplasmin	3798	20	0	85.01	4	P:GO:0006457; P:GO:0006950; F:GO:0043167; F:GO:0051082	P:protein folding; P:response to stress; F:ion binding; F:unfolded protein binding			Coil (COILS); IPR020575 (PRINTS); IPR003594 (SMART); G3DSA:3.40.50.11260 (GENE3D); G3DSA:3.30.70.2140 (GENE3D); IPR037196 (G3DSA:1.20.120.GENE3D); IPR001404 (PFAM); IPR036890 (G3DSA:3.30.565.GENE3D); IPR001404 (PIRSF); IPR003594 (PFAM); G3DSA:3.30.230.80 (GENE3D); mobidb-lite (MOBIDB_LITE); mobidb-lite (MOBIDB_LITE); PTHR11528:SF73 (PANTHER); IPR001404 (PANTHER); IPR019805 (PROSITE_PATTERNS); SIG…	F:GO:0005524; P:GO:0006457; P:GO:0006950; F:GO:0051082	F:ATP binding; P:protein folding; P:response to stress; F:unfolded protein binding
TRUE	[INTERPRO, BLASTED]	scaffold_000191F_transcript_id_5722seq_length_2178	PREDICTED: uncharacterized protein LOC109031933	2178	20	0	60.64						IPR015897 (SMART); IPR004119 (PFAM); PTHR11012 (PANTHER); IPR011009 (SUPERFAMILY)	no GO terms	no GO terms
TRUE	[INTERPRO, BLASTED, MAPPED]	scaffold_000000F_transcript_id_27043seq_length_2243	monoacylglycerol lipase ABHD12 isoform X1	2243	20	0	68.07	2	C:GO:0016020; C:GO:0016021	C:membrane; C:integral component of membrane			IPR022742 (PFAM); mobidb-lite (MOBIDB_LITE); PTHR12277:SF122 (PANTHER); PTHR12277 (PANTHER); CYTOPLASMIC_DOMAIN (PHOBIUS); TRANSMEMBRANE (PHOBIUS); NON_CYTOPLASMIC_DOMAIN (PHOBIUS); IPR029058 (SUPERFAMILY); TMhelix (TMHMM)	no GO terms	no GO terms
TRUE	[INTERPRO, BLASTED, MAPPED]	scaffold_000338F_transcript_id_3747seq_length_1112	cathepsin B-like cysteine proteinase 6	1112	20	0	56.43	8	F:GO:0004197; C:GO:0005615; C:GO:0005764; P:GO:0006508; F:GO:0008234; F:GO:0016787; P:GO:0050790; P:GO:0051603	F:cysteine-type endopeptidase activity; C:extracellular space; C:lysosome; P:proteolysis; F:cysteine-type peptidase activity; F:hydrolase activity; P:regulation of catalytic activity; P:proteolysis involved in cellular protein catabolic process			IPR000668 (SMART); IPR000668 (PFAM); G3DSA:3.90.70.10 (GENE3D); PTHR12411:SF540 (PANTHER); IPR013128 (PANTHER); SIGNAL_PEPTIDE_N_REGION (PHOBIUS); SIGNAL_PEPTIDE (PHOBIUS); NON_CYTOPLASMIC_DOMAIN (PHOBIUS); SIGNAL_PEPTIDE_H_REGION (PHOBIUS); SIGNAL_PEPTIDE_C_REGION (PHOBIUS); SignalP-noTM (SIGNALP_EUK); IPR038765 (SUPERFAMILY)	P:GO:0006508; F:GO:0008234	P:proteolysis; F:cysteine-type peptidase activity
TRUE	[INTERPRO, BLASTED, MAPPED, GO-SLIM]	scaffold_000009F_transcript_id_26789seq_length_1658	UDP-glucuronosyltransferase 2C1-like	1658	20	0	60.2	1	F:GO:0003674	F:molecular_function			G3DSA:3.40.50.2000 (GENE3D); IPR002213 (PFAM); G3DSA:3.40.50.2000 (GENE3D); PTHR11926:SF151 (PANTHER); PTHR11926 (PANTHER); IPR035595 (PROSITE_PATTERNS); SIGNAL_PEPTIDE (PHOBIUS); CYTOPLASMIC_DOMAIN (PHOBIUS); NON_CYTOPLASMIC_DOMAIN (PHOBIUS); TRANSMEMBRANE (PHOBIUS); SIGNAL_PEPTIDE_C_REGION (PHOBIUS); SIGNAL_PEPTIDE_N_REGION (PHOBIUS); SIGNAL_PEPTIDE_H_REGION (PHOBIUS); SignalP-noTM (SIGNALP_EUK…	P:GO:0008152; F:GO:0016758	P:metabolic process; F:transferase activity, transferring hexosyl groups
TRUE	[INTERPRO, BLASTED, MAPPED]	scaffold_000784F_transcript_id_3556seq_length_2968-1	cytochrome b5-related protein-like	2968	20	0	66.02	7	P:GO:0006629; C:GO:0016020; C:GO:0016021; F:GO:0016491; F:GO:0020037; F:GO:0046872; P:GO:0055114	P:lipid metabolic process; C:membrane; C:integral component of membrane; F:oxidoreductase activity; F:heme binding; F:metal ion binding; P:oxidation-reduction process			IPR001199 (SMART); IPR005804 (PFAM); IPR036400 (G3DSA:3.10.120.GENE3D); IPR001199 (PFAM); PTHR16740 (PANTHER); TRANSMEMBRANE (PHOBIUS); NON_CYTOPLASMIC_DOMAIN (PHOBIUS); TRANSMEMBRANE (PHOBIUS); CYTOPLASMIC_DOMAIN (PHOBIUS); NON_CYTOPLASMIC_DOMAIN (PHOBIUS); TRANSMEMBRANE (PHOBIUS); NON_CYTOPLASMIC_DOMAIN (PHOBIUS); CYTOPLASMIC_DOMAIN (PHOBIUS); CYTOPLASMIC_DOMAIN (PHOBIUS); TRANSMEMBRANE (PHOBIU…	P:GO:0006629	P:lipid metabolic process
TRUE	[INTERPRO, BLASTED, MAPPED, GO-SLIM]	scaffold_000093F_transcript_id_19017seq_length_1669	cytochrome P450 6k1-like	1669	20	0	63.18	1	F:GO:0016491	F:oxidoreductase activity			IPR001128 (PRINTS); IPR002401 (PRINTS); IPR001128 (PFAM); IPR036396 (G3DSA:1.10.630.GENE3D); PTHR24292 (PANTHER); IPR017972 (PROSITE_PATTERNS); TRANSMEMBRANE (PHOBIUS); SIGNAL_PEPTIDE_N_REGION (PHOBIUS); CYTOPLASMIC_DOMAIN (PHOBIUS); SIGNAL_PEPTIDE_C_REGION (PHOBIUS); SIGNAL_PEPTIDE_H_REGION (PHOBIUS); NON_CYTOPLASMIC_DOMAIN (PHOBIUS); SIGNAL_PEPTIDE (PHOBIUS); SignalP-noTM (SIGNALP_EUK); IPR0363…	F:GO:0005506; F:GO:0016705; F:GO:0020037; P:GO:0055114	F:iron ion binding; F:oxidoreductase activity, acting on paired donors, with incorporation or reduction of molecular oxygen; F:heme binding; P:oxidation-reduction process
TRUE	[INTERPRO, BLASTED, MAPPED, GO-SLIM]	scaffold_000092F_transcript_id_12827seq_length_1832	protein pelota	1832	20	0	90.85	5	F:GO:0004518; C:GO:0005634; C:GO:0005737; P:GO:0034655; F:GO:0043167	F:nuclease activity; C:nucleus; C:cytoplasm; P:nucleobase-containing compound catabolic process; F:ion binding			IPR005140 (SMART); IPR005141 (PFAM); G3DSA:3.30.420.60 (GENE3D); IPR029064 (G3DSA:3.30.1330.GENE3D); IPR005142 (PFAM); IPR038069 (G3DSA:2.30.30.GENE3D); IPR005140 (PFAM); IPR004405 (TIGRFAM); IPR004405 (PANTHER); IPR038069 (SUPERFAMILY); IPR029064 (SUPERFAMILY); SSF53137 (SUPERFAMILY)	P:GO:0070481; P:GO:0070966; P:GO:0071025	P:nuclear-transcribed mRNA catabolic process, non-stop decay; P:nuclear-transcribed mRNA catabolic process, no-go decay; P:RNA surveillance
TRUE	[INTERPRO, BLASTED]	scaffold_000449F_transcript_id_106seq_length_2322	PREDICTED: uncharacterized protein LOC109031932	2322	20	0	61.44						IPR015897 (SMART); IPR004119 (PFAM); PTHR11012 (PANTHER); IPR011009 (SUPERFAMILY)	no GO terms	no GO terms
TRUE	[INTERPRO, BLASTED, MAPPED, GO-SLIM]	scaffold_000221F_transcript_id_2231seq_length_3561	glutamine synthetase 2 cytoplasmic-like	3561	20	0	86.99	5	P:GO:0006520; P:GO:0009058; F:GO:0016874; F:GO:0043167; P:GO:0071554	P:cellular amino acid metabolic process; P:biosynthetic process; F:ligase activity; F:ion binding; P:cell wall organization or biogenesis	EC:6.3.1.2	Glutamine synthetase	IPR008146 (SMART); IPR008146 (PFAM); IPR036651 (G3DSA:3.10.20.GENE3D); G3DSA:3.30.590.40 (GENE3D); PTHR20852:SF43 (PANTHER); PTHR20852 (PANTHER); IPR027302 (PROSITE_PATTERNS); IPR027303 (PROSITE_PATTERNS); IPR014746 (SUPERFAMILY); IPR036651 (SUPERFAMILY)	F:GO:0003824; F:GO:0004356; P:GO:0006542; P:GO:0006807	F:catalytic activity; F:glutamate-ammonia ligase activity; P:glutamine biosynthetic process; P:nitrogen compound metabolic process
TRUE	[INTERPRO, BLASTED, MAPPED, GO-SLIM]	scaffold_000065F_transcript_id_18505seq_length_1456	cathepsin B-like cysteine proteinase 4 isoform X1	1456	20	0	62.55	1	F:GO:0003674	F:molecular_function			IPR000668 (SMART); G3DSA:3.90.70.10 (GENE3D); IPR000668 (PFAM); IPR013128 (PANTHER); PTHR12411:SF540 (PANTHER); NON_CYTOPLASMIC_DOMAIN (PHOBIUS); SIGNAL_PEPTIDE (PHOBIUS); SIGNAL_PEPTIDE_N_REGION (PHOBIUS); SIGNAL_PEPTIDE_H_REGION (PHOBIUS); SIGNAL_PEPTIDE_C_REGION (PHOBIUS); cd02620 (CDD); SignalP-TM (SIGNALP_GRAM_POSITIVE); IPR038765 (SUPERFAMILY); TMhelix (TMHMM)	P:GO:0006508; F:GO:0008234	P:proteolysis; F:cysteine-type peptidase activity
TRUE	[INTERPRO, BLASTED, MAPPED, GO-SLIM]	scaffold_000018F_transcript_id_24389seq_length_2193	facilitated trehalose transporter Tret1-like	2193	20	0	72.82	2	C:GO:0005575; F:GO:0022857	C:cellular_component; F:transmembrane transporter activity			IPR003663 (PRINTS); IPR005828 (PFAM); G3DSA:1.20.1250.20 (GENE3D); mobidb-lite (MOBIDB_LITE); PTHR23500:SF11 (PANTHER); PTHR23500 (PANTHER); IPR005829 (PROSITE_PATTERNS); NON_CYTOPLASMIC_DOMAIN (PHOBIUS); TRANSMEMBRANE (PHOBIUS); CYTOPLASMIC_DOMAIN (PHOBIUS); TRANSMEMBRANE (PHOBIUS); TRANSMEMBRANE (PHOBIUS); TRANSMEMBRANE (PHOBIUS); CYTOPLASMIC_DOMAIN (PHOBIUS); TRANSMEMBRANE (PHOBIUS); TRANSMEMB…	F:GO:0005215; C:GO:0016020; C:GO:0016021; F:GO:0022857; P:GO:0055085	F:transporter activity; C:membrane; C:integral component of membrane; F:transmembrane transporter activity; P:transmembrane transport
TRUE	[INTERPRO, BLASTED, MAPPED, GO-SLIM]	scaffold_000025F_transcript_id_20443seq_length_1434	hydroxyacid oxidase 1	1434	20	0	79.29	2	F:GO:0016491; F:GO:0043167	F:oxidoreductase activity; F:ion binding			IPR012133 (PIRSF); IPR013785 (G3DSA:3.20.20.GENE3D); IPR000262 (PFAM); PTHR10578 (PANTHER); IPR008259 (PROSITE_PATTERNS); IPR037396 (PROSITE_PROFILES); IPR012133 (CDD); SSF51395 (SUPERFAMILY)	F:GO:0003824; F:GO:0010181; F:GO:0016491; P:GO:0055114	F:catalytic activity; F:FMN binding; F:oxidoreductase activity; P:oxidation-reduction process
TRUE	[INTERPRO, BLASTED, MAPPED]	scaffold_000007F_transcript_id_24948seq_length_1056	L-galactose dehydrogenase-like	1056	20	0	68.82	2	F:GO:0016491; P:GO:0055114	F:oxidoreductase activity; P:oxidation-reduction process			IPR023210 (PFAM); IPR036812 (G3DSA:3.20.20.GENE3D); PTHR42686 (PANTHER); IPR023210 (CDD); IPR036812 (SUPERFAMILY)	no GO terms	no GO terms
TRUE	[INTERPRO, BLASTED, MAPPED, GO-SLIM]	scaffold_000005F_transcript_id_23354seq_length_2580	oocyte zinc finger protein XlCOF6-like	2580	20	0	69.56	1	F:GO:0003674	F:molecular_function			IPR013087 (SMART); G3DSA:3.30.160.60 (GENE3D); G3DSA:3.30.160.60 (GENE3D); G3DSA:3.30.160.60 (GENE3D); G3DSA:3.30.160.60 (GENE3D); PF00096 (PFAM); G3DSA:3.30.160.60 (GENE3D); PF13894 (PFAM); mobidb-lite (MOBIDB_LITE); mobidb-lite (MOBIDB_LITE); PTHR43950 (PANTHER); IPR013087 (PROSITE_PATTERNS); IPR013087 (PROSITE_PATTERNS); IPR013087 (PROSITE_PATTERNS); IPR013087 (PROSITE_PATTERNS); IPR013087 (PR…	F:GO:0003676	F:nucleic acid binding
TRUE	[INTERPRO, BLASTED]	scaffold_000038F_transcript_id_7712seq_length_2145	UDP-glucuronosyltransferase 2B18-like	2145	20	0	80.06						IPR002213 (PFAM); G3DSA:3.40.50.2000 (GENE3D); PTHR11926:SF151 (PANTHER); PTHR11926 (PANTHER); IPR035595 (PROSITE_PATTERNS); NON_CYTOPLASMIC_DOMAIN (PHOBIUS); TRANSMEMBRANE (PHOBIUS); TRANSMEMBRANE (PHOBIUS); NON_CYTOPLASMIC_DOMAIN (PHOBIUS); CYTOPLASMIC_DOMAIN (PHOBIUS); SSF53756 (SUPERFAMILY); TMhelix (TMHMM)	P:GO:0008152; F:GO:0016758	P:metabolic process; F:transferase activity, transferring hexosyl groups
TRUE	[INTERPRO, BLASTED]	scaffold_000630F_transcript_id_848seq_length_2574	facilitated trehalose transporter Tret1-like	2574	20	0	60.05						IPR005828 (PFAM); G3DSA:1.20.1250.20 (GENE3D); PTHR23500:SF11 (PANTHER); PTHR23500 (PANTHER); TRANSMEMBRANE (PHOBIUS); TRANSMEMBRANE (PHOBIUS); TRANSMEMBRANE (PHOBIUS); CYTOPLASMIC_DOMAIN (PHOBIUS); NON_CYTOPLASMIC_DOMAIN (PHOBIUS); NON_CYTOPLASMIC_DOMAIN (PHOBIUS); TRANSMEMBRANE (PHOBIUS); NON_CYTOPLASMIC_DOMAIN (PHOBIUS); TRANSMEMBRANE (PHOBIUS); CYTOPLASMIC_DOMAIN (PHOBIUS); TRANSMEMBRANE (PHO…	C:GO:0016021; F:GO:0022857; P:GO:0055085	C:integral component of membrane; F:transmembrane transporter activity; P:transmembrane transport
TRUE	[INTERPRO, BLASTED, MAPPED]	scaffold_000025F_transcript_id_20016seq_length_2596	beta-1,4-glucuronyltransferase 1-like	2596	20	0	68.38	4	C:GO:0016020; C:GO:0016021; F:GO:0016740; F:GO:0016757	C:membrane; C:integral component of membrane; F:transferase activity; F:transferase activity, transferring glycosyl groups			PF13896 (PFAM); PTHR12270:SF44 (PANTHER); PTHR12270 (PANTHER); NON_CYTOPLASMIC_DOMAIN (PHOBIUS); CYTOPLASMIC_DOMAIN (PHOBIUS); TRANSMEMBRANE (PHOBIUS); TMhelix (TMHMM)	no GO terms	no GO terms
TRUE	[INTERPRO, BLASTED, MAPPED, GO-SLIM]	scaffold_000021F_transcript_id_20659seq_length_1961	dynein beta chain, ciliary	1961	20	0	90.47	5	C:GO:0005856; P:GO:0008150; F:GO:0016887; C:GO:0032991; F:GO:0043167	C:cytoskeleton; P:biological_process; F:ATPase activity; C:protein-containing complex; F:ion binding	EC:3.6.1.3; EC:3.6.1.15	Adenosinetriphosphatase; Nucleoside-triphosphate phosphatase	G3DSA:1.20.58.1120 (GENE3D); G3DSA:1.10.8.710 (GENE3D); IPR035699 (PFAM); G3DSA:3.40.50.300 (GENE3D); G3DSA:3.40.50.300 (GENE3D); G3DSA:3.20.180.20 (GENE3D); IPR026983 (PANTHER); PTHR10676:SF257 (PANTHER); IPR027417 (SUPERFAMILY); IPR027417 (SUPERFAMILY)	F:GO:0003777; F:GO:0005524; P:GO:0007018	F:microtubule motor activity; F:ATP binding; P:microtubule-based movement
TRUE	[INTERPRO, BLASTED, MAPPED, GO-SLIM]	scaffold_000084F_transcript_id_17251seq_length_1477	mothers against decapentaplegic homolog 4-like	1477	20	8.29667e-137	89.62	8	F:GO:0003677; F:GO:0003700; C:GO:0005634; C:GO:0005737; P:GO:0007165; P:GO:0009058; C:GO:0032991; P:GO:0034641	F:DNA binding; F:DNA-binding transcription factor activity; C:nucleus; C:cytoplasm; P:signal transduction; P:biosynthetic process; C:protein-containing complex; P:cellular nitrogen compound metabolic process			Coil (COILS); IPR003619 (SMART); IPR003619 (PFAM); IPR036578 (G3DSA:3.90.520.GENE3D); mobidb-lite (MOBIDB_LITE); mobidb-lite (MOBIDB_LITE); IPR013790 (PANTHER); PTHR13703:SF50 (PANTHER); IPR013019 (PROSITE_PROFILES); cd10492 (CDD); IPR036578 (SUPERFAMILY)	F:GO:0003700; C:GO:0005622; C:GO:0005667; P:GO:0006355; P:GO:0007179	F:DNA-binding transcription factor activity; C:intracellular; C:transcription factor complex; P:regulation of transcription, DNA-templated; P:transforming growth factor beta receptor signaling pathway
TRUE	[INTERPRO, BLASTED, MAPPED, GO-SLIM]	scaffold_000039F_transcript_id_21667seq_length_2229	glutamate dehydrogenase, mitochondrial	2229	20	0	91.18	2	P:GO:0006520; F:GO:0016491	P:cellular amino acid metabolic process; F:oxidoreductase activity			IPR006095 (PRINTS); IPR006096 (SMART); G3DSA:1.10.287.140 (GENE3D); G3DSA:3.40.50.10860 (GENE3D); G3DSA:3.40.50.720 (GENE3D); IPR006096 (PFAM); IPR006097 (PFAM); PTHR11606 (PANTHER); PTHR11606:SF25 (PANTHER); IPR033922 (CDD); SSF53223 (SUPERFAMILY); IPR036291 (SUPERFAMILY)	P:GO:0006520; F:GO:0016491; F:GO:0016639; P:GO:0055114	P:cellular amino acid metabolic process; F:oxidoreductase activity; F:oxidoreductase activity, acting on the CH-NH2 group of donors, NAD or NADP as acceptor; P:oxidation-reduction process
TRUE	[INTERPRO, BLASTED, MAPPED, GO-SLIM]	scaffold_000019F_transcript_id_22591seq_length_1008	Pantothenate kinase 4	1008	20	7.01429e-145	86.03	6	P:GO:0009058; F:GO:0016301; P:GO:0034641; F:GO:0043167; P:GO:0044281; P:GO:0051186	P:biosynthetic process; F:kinase activity; P:cellular nitrogen compound metabolic process; F:ion binding; P:small molecule metabolic process; P:cofactor metabolic process	EC:2.7.1.33	Pantothenate kinase	G3DSA:3.30.420.40 (GENE3D); G3DSA:3.30.420.510 (GENE3D); IPR004567 (PFAM); PTHR12280:SF20 (PANTHER); PTHR12280 (PANTHER); SSF53067 (SUPERFAMILY); SSF53067 (SUPERFAMILY)	F:GO:0004594; F:GO:0005524; P:GO:0015937	F:pantothenate kinase activity; F:ATP binding; P:coenzyme A biosynthetic process
TRUE	[INTERPRO, BLASTED]	scaffold_000196F_transcript_id_7442seq_length_2368	facilitated trehalose transporter Tret1-like	2368	20	0	69.89						IPR005828 (PFAM); G3DSA:1.20.1250.20 (GENE3D); mobidb-lite (MOBIDB_LITE); mobidb-lite (MOBIDB_LITE); PTHR23500 (PANTHER); PTHR23500 (PANTHER); PTHR23500:SF3 (PANTHER); PTHR23500:SF3 (PANTHER); IPR005829 (PROSITE_PATTERNS); TRANSMEMBRANE (PHOBIUS); TRANSMEMBRANE (PHOBIUS); CYTOPLASMIC_DOMAIN (PHOBIUS); CYTOPLASMIC_DOMAIN (PHOBIUS); TRANSMEMBRANE (PHOBIUS); NON_CYTOPLASMIC_DOMAIN (PHOBIUS); TRANSME…	F:GO:0005215; C:GO:0016021; F:GO:0022857; P:GO:0055085	F:transporter activity; C:integral component of membrane; F:transmembrane transporter activity; P:transmembrane transport
TRUE	[INTERPRO, BLASTED]	scaffold_000047F_transcript_id_19061seq_length_3328	facilitated trehalose transporter Tret1-like	3328	20	0	63.95						IPR005828 (PFAM); G3DSA:1.20.1250.20 (GENE3D); PTHR23500 (PANTHER); PTHR23500:SF3 (PANTHER); PTHR23500 (PANTHER); PTHR23500:SF3 (PANTHER); TRANSMEMBRANE (PHOBIUS); TRANSMEMBRANE (PHOBIUS); NON_CYTOPLASMIC_DOMAIN (PHOBIUS); TRANSMEMBRANE (PHOBIUS); TRANSMEMBRANE (PHOBIUS); CYTOPLASMIC_DOMAIN (PHOBIUS); TRANSMEMBRANE (PHOBIUS); TRANSMEMBRANE (PHOBIUS); CYTOPLASMIC_DOMAIN (PHOBIUS); CYTOPLASMIC_DOMA…	C:GO:0016021; F:GO:0022857; P:GO:0055085	C:integral component of membrane; F:transmembrane transporter activity; P:transmembrane transport
TRUE	[INTERPRO, BLASTED, MAPPED, GO-SLIM]	scaffold_000178F_transcript_id_9413seq_length_2044	protein D3	2044	20	6.88279e-174	63.05	1	P:GO:0008150	P:biological_process			IPR036610 (G3DSA:3.90.280.GENE3D); IPR008914 (PFAM); IPR035810 (PANTHER); IPR035810 (CDD); IPR036610 (SUPERFAMILY)	no GO terms	no GO terms
TRUE	[INTERPRO, BLASTED, MAPPED]	scaffold_000008F_transcript_id_24089seq_length_1763	thiamine transporter 1-like	1763	20	0	64.65	5	C:GO:0016020; C:GO:0016021; P:GO:0035461; P:GO:0051180; F:GO:0090482	C:membrane; C:integral component of membrane; P:vitamin transmembrane transport; P:vitamin transport; F:vitamin transmembrane transporter activity			IPR002666 (PFAM); IPR002666 (TIGRFAM); IPR002666 (PIRSF); IPR002666 (PANTHER); NON_CYTOPLASMIC_DOMAIN (PHOBIUS); TRANSMEMBRANE (PHOBIUS); TRANSMEMBRANE (PHOBIUS); TRANSMEMBRANE (PHOBIUS); CYTOPLASMIC_DOMAIN (PHOBIUS); TRANSMEMBRANE (PHOBIUS); TRANSMEMBRANE (PHOBIUS); TRANSMEMBRANE (PHOBIUS); NON_CYTOPLASMIC_DOMAIN (PHOBIUS); CYTOPLASMIC_DOMAIN (PHOBIUS); TRANSMEMBRANE (PHOBIUS); CYTOPLASMIC_DOMAI…	C:GO:0016021; P:GO:0051180; F:GO:0090482	C:integral component of membrane; P:vitamin transport; F:vitamin transmembrane transporter activity
TRUE	[INTERPRO, BLASTED, MAPPED]	scaffold_000063F_transcript_id_16476seq_length_2259	cytochrome P450 4C1-like	2259	20	0	68.19	9	F:GO:0004497; F:GO:0005506; C:GO:0016020; C:GO:0016021; F:GO:0016491; F:GO:0016705; F:GO:0020037; F:GO:0046872; P:GO:0055114	F:monooxygenase activity; F:iron ion binding; C:membrane; C:integral component of membrane; F:oxidoreductase activity; F:oxidoreductase activity, acting on paired donors, with incorporation or reduction of molecular oxygen; F:heme binding; F:metal ion binding; P:oxidation-reduction process			IPR001128 (PRINTS); IPR002401 (PRINTS); IPR001128 (PFAM); IPR036396 (G3DSA:1.10.630.GENE3D); PTHR24291:SF56 (PANTHER); PTHR24291 (PANTHER); IPR017972 (PROSITE_PATTERNS); CYTOPLASMIC_DOMAIN (PHOBIUS); NON_CYTOPLASMIC_DOMAIN (PHOBIUS); TRANSMEMBRANE (PHOBIUS); IPR036396 (SUPERFAMILY)	F:GO:0005506; F:GO:0016705; F:GO:0020037; P:GO:0055114	F:iron ion binding; F:oxidoreductase activity, acting on paired donors, with incorporation or reduction of molecular oxygen; F:heme binding; P:oxidation-reduction process
TRUE	[INTERPRO, BLASTED]	scaffold_000002F_transcript_id_25252seq_length_1719	facilitated trehalose transporter Tret1-like	1719	20	0	66.29						IPR005828 (PFAM); G3DSA:1.20.1250.20 (GENE3D); PTHR23500:SF37 (PANTHER); PTHR23500 (PANTHER); IPR005829 (PROSITE_PATTERNS); TRANSMEMBRANE (PHOBIUS); TRANSMEMBRANE (PHOBIUS); TRANSMEMBRANE (PHOBIUS); NON_CYTOPLASMIC_DOMAIN (PHOBIUS); TRANSMEMBRANE (PHOBIUS); TRANSMEMBRANE (PHOBIUS); TRANSMEMBRANE (PHOBIUS); TRANSMEMBRANE (PHOBIUS); CYTOPLASMIC_DOMAIN (PHOBIUS); TRANSMEMBRANE (PHOBIUS); NON_CYTOPLA…	F:GO:0005215; C:GO:0016021; F:GO:0022857; P:GO:0055085	F:transporter activity; C:integral component of membrane; F:transmembrane transporter activity; P:transmembrane transport
TRUE	[INTERPRO, BLASTED, MAPPED, GO-SLIM]	scaffold_000049F_transcript_id_13852seq_length_1119	MAP kinase-activated protein kinase 2	1119	20	0	86.38	4	P:GO:0006464; P:GO:0006520; F:GO:0016301; F:GO:0043167	P:cellular protein modification process; P:cellular amino acid metabolic process; F:kinase activity; F:ion binding	EC:2.7.11	Transferring phosphorus-containing groups	IPR000719 (SMART); IPR027442 (G3DSA:4.10.1170.GENE3D); G3DSA:1.10.510.10 (GENE3D); PIRSF000654 (PIRSF); G3DSA:3.30.200.20 (GENE3D); IPR000719 (PFAM); PTHR24349 (PANTHER); PTHR24349:SF64 (PANTHER); IPR008271 (PROSITE_PATTERNS); IPR017441 (PROSITE_PATTERNS); TRANSMEMBRANE (PHOBIUS); NON_CYTOPLASMIC_DOMAIN (PHOBIUS); CYTOPLASMIC_DOMAIN (PHOBIUS); IPR000719 (PROSITE_PROFILES); cd14089 (CDD); IPR01100…	F:GO:0004672; F:GO:0005524; P:GO:0006468	F:protein kinase activity; F:ATP binding; P:protein phosphorylation
TRUE	[INTERPRO, BLASTED, MAPPED, GO-SLIM]	scaffold_000012F_transcript_id_21462seq_length_1646	ribonuclease UK114	1646	20	1.42403e-82	76.79	10	F:GO:0004518; C:GO:0005634; C:GO:0005739; C:GO:0005777; C:GO:0005829; P:GO:0006412; P:GO:0006520; P:GO:0009056; F:GO:0043167; P:GO:0048856	F:nuclease activity; C:nucleus; C:mitochondrion; C:peroxisome; C:cytosol; P:translation; P:cellular amino acid metabolic process; P:catabolic process; F:ion binding; P:anatomical structure development	EC:3.1.31; EC:3.1.27	Acting on ester bonds; Acting on ester bonds	IPR035959 (G3DSA:3.30.1330.GENE3D); IPR006175 (PFAM); IPR006056 (TIGRFAM); PTHR11803:SF33 (PANTHER); IPR006175 (PANTHER); cd00448 (CDD); IPR035959 (SUPERFAMILY)	no GO terms	no GO terms
TRUE	[INTERPRO, BLASTED]	scaffold_000038F_transcript_id_7666seq_length_1883	UDP-glucuronosyltransferase 2B18-like	1883	20	0	76.67						IPR002213 (PFAM); G3DSA:3.40.50.2000 (GENE3D); PTHR11926:SF151 (PANTHER); PTHR11926 (PANTHER); IPR035595 (PROSITE_PATTERNS); SIGNAL_PEPTIDE_C_REGION (PHOBIUS); NON_CYTOPLASMIC_DOMAIN (PHOBIUS); SIGNAL_PEPTIDE_N_REGION (PHOBIUS); CYTOPLASMIC_DOMAIN (PHOBIUS); TRANSMEMBRANE (PHOBIUS); SIGNAL_PEPTIDE (PHOBIUS); SIGNAL_PEPTIDE_H_REGION (PHOBIUS); SSF53756 (SUPERFAMILY); TMhelix (TMHMM); TMhelix (TMHM…	P:GO:0008152; F:GO:0016758	P:metabolic process; F:transferase activity, transferring hexosyl groups
TRUE	[INTERPRO, BLASTED, MAPPED]	scaffold_000652F_transcript_id_3234seq_length_2618	major facilitator superfamily domain-containing protein 6-A-like	2618	20	0	66.71	2	C:GO:0016020; C:GO:0016021	C:membrane; C:integral component of membrane			G3DSA:1.20.1250.20 (GENE3D); G3DSA:1.20.1250.20 (GENE3D); IPR024989 (PFAM); mobidb-lite (MOBIDB_LITE); mobidb-lite (MOBIDB_LITE); mobidb-lite (MOBIDB_LITE); PTHR16172:SF34 (PANTHER); PTHR16172:SF34 (PANTHER); PTHR16172 (PANTHER); NON_CYTOPLASMIC_DOMAIN (PHOBIUS); CYTOPLASMIC_DOMAIN (PHOBIUS); TRANSMEMBRANE (PHOBIUS); TRANSMEMBRANE (PHOBIUS); CYTOPLASMIC_DOMAIN (PHOBIUS); TRANSMEMBRANE (PHOBIUS); …	no GO terms	no GO terms
TRUE	[INTERPRO, BLASTED, MAPPED, GO-SLIM]	scaffold_000004F_transcript_id_23512seq_length_1473	peroxiredoxin-6-like	1473	20	1.08501e-156	86.95	4	C:GO:0005623; P:GO:0006950; F:GO:0016491; P:GO:0042592	C:cell; P:response to stress; F:oxidoreductase activity; P:homeostatic process	EC:1.11.1.15; EC:1.11.1.7	Peroxiredoxin; Peroxidase	IPR000866 (PFAM); IPR024706 (PIRSF); IPR019479 (PFAM); G3DSA:3.40.30.10 (GENE3D); G3DSA:3.30.1020.10 (GENE3D); PTHR43503 (PANTHER); PTHR43503:SF3 (PANTHER); IPR013766 (PROSITE_PROFILES); cd03016 (CDD); IPR036249 (SUPERFAMILY)	F:GO:0016209; F:GO:0016491; P:GO:0045454; F:GO:0051920; P:GO:0055114	F:antioxidant activity; F:oxidoreductase activity; P:cell redox homeostasis; F:peroxiredoxin activity; P:oxidation-reduction process
TRUE	[INTERPRO, BLASTED, MAPPED, GO-SLIM]	scaffold_000344F_transcript_id_1124seq_length_1250	mitogen-activated protein kinase 1	1250	20	8.26995e-169	96.85	7	C:GO:0005634; C:GO:0005737; P:GO:0006464; P:GO:0006520; P:GO:0007165; F:GO:0016301; F:GO:0043167	C:nucleus; C:cytoplasm; P:cellular protein modification process; P:cellular amino acid metabolic process; P:signal transduction; F:kinase activity; F:ion binding	EC:2.7.11; EC:2.7.11.24	Transferring phosphorus-containing groups; Mitogen-activated protein kinase	IPR008349 (PRINTS); IPR000719 (SMART); G3DSA:1.10.510.10 (GENE3D); PIRSF000615 (PIRSF); IPR000719 (PFAM); PTHR24055:SF257 (PANTHER); PTHR24055 (PANTHER); IPR008271 (PROSITE_PATTERNS); SIGNAL_PEPTIDE (PHOBIUS); SIGNAL_PEPTIDE_H_REGION (PHOBIUS); NON_CYTOPLASMIC_DOMAIN (PHOBIUS); SIGNAL_PEPTIDE_C_REGION (PHOBIUS); SIGNAL_PEPTIDE_N_REGION (PHOBIUS); IPR000719 (PROSITE_PROFILES); SignalP-noTM (SIGNAL…	F:GO:0004672; F:GO:0004707; F:GO:0005524; P:GO:0006468	F:protein kinase activity; F:MAP kinase activity; F:ATP binding; P:protein phosphorylation
TRUE	[INTERPRO, BLASTED]	scaffold_000286F_transcript_id_4445seq_length_2764	kelch-like protein 5 isoform X2	2764	20	1.99781e-146	88.56						PR00501 (PRINTS); IPR006652 (SMART); IPR015915 (G3DSA:2.120.10.GENE3D); IPR006652 (PFAM); IPR015915 (G3DSA:2.120.10.GENE3D); PTHR24412 (PANTHER); PTHR24412:SF135 (PANTHER); IPR015915 (SUPERFAMILY); IPR015915 (SUPERFAMILY)	F:GO:0005515	F:protein binding
TRUE	[INTERPRO, BLASTED, MAPPED, GO-SLIM]	scaffold_000111F_transcript_id_8402seq_length_3472-1	meprin A subunit beta-like	3472	20	0	62.18	1	F:GO:0008233	F:peptidase activity			IPR001506 (PRINTS); IPR000998 (SMART); IPR006026 (SMART); IPR000998 (PFAM); IPR024079 (G3DSA:3.40.390.GENE3D); G3DSA:2.60.120.200 (GENE3D); IPR001506 (PFAM); mobidb-lite (MOBIDB_LITE); PTHR10127 (PANTHER); SIGNAL_PEPTIDE_H_REGION (PHOBIUS); SIGNAL_PEPTIDE_C_REGION (PHOBIUS); SIGNAL_PEPTIDE (PHOBIUS); SIGNAL_PEPTIDE_N_REGION (PHOBIUS); NON_CYTOPLASMIC_DOMAIN (PHOBIUS); IPR000998 (PROSITE_PROFILES)…	F:GO:0004222; P:GO:0006508; F:GO:0008237; F:GO:0008270; C:GO:0016020	F:metalloendopeptidase activity; P:proteolysis; F:metallopeptidase activity; F:zinc ion binding; C:membrane
TRUE	[INTERPRO, BLASTED, MAPPED]	scaffold_001071F_transcript_id_10164seq_length_1398	GPI mannosyltransferase 2	1398	20	0	58.39	9	F:GO:0004584; C:GO:0005783; C:GO:0005789; P:GO:0006506; C:GO:0016020; C:GO:0016021; F:GO:0016740; F:GO:0016757; P:GO:0097502	F:dolichyl-phosphate-mannose-glycolipid alpha-mannosyltransferase activity; C:endoplasmic reticulum; C:endoplasmic reticulum membrane; P:GPI anchor biosynthetic process; C:membrane; C:integral component of membrane; F:transferase activity; F:transferase activity, transferring glycosyl groups; P:mannosylation			IPR007315 (PFAM); PTHR12468:SF2 (PANTHER); IPR007315 (PANTHER); NON_CYTOPLASMIC_DOMAIN (PHOBIUS); TRANSMEMBRANE (PHOBIUS); SIGNAL_PEPTIDE_N_REGION (PHOBIUS); TRANSMEMBRANE (PHOBIUS); CYTOPLASMIC_DOMAIN (PHOBIUS); TRANSMEMBRANE (PHOBIUS); NON_CYTOPLASMIC_DOMAIN (PHOBIUS); NON_CYTOPLASMIC_DOMAIN (PHOBIUS); TRANSMEMBRANE (PHOBIUS); TRANSMEMBRANE (PHOBIUS); CYTOPLASMIC_DOMAIN (PHOBIUS); NON_CYTOPLASM…	F:GO:0004584; P:GO:0006506	F:dolichyl-phosphate-mannose-glycolipid alpha-mannosyltransferase activity; P:GPI anchor biosynthetic process
TRUE	[INTERPRO, BLASTED]	scaffold_000025F_transcript_id_19677seq_length_2017	connectin	2017	20	0	62.55						IPR003591 (SMART); SM00365 (SMART); IPR032675 (G3DSA:3.80.10.GENE3D); IPR032675 (G3DSA:3.80.10.GENE3D); IPR001611 (PFAM); IPR032675 (G3DSA:3.80.10.GENE3D); mobidb-lite (MOBIDB_LITE); mobidb-lite (MOBIDB_LITE); PTHR24373 (PANTHER); PTHR24373:SF237 (PANTHER); PTHR24373:SF237 (PANTHER); PTHR24373 (PANTHER); SIGNAL_PEPTIDE_H_REGION (PHOBIUS); SIGNAL_PEPTIDE_N_REGION (PHOBIUS); SIGNAL_PEPTIDE_C_REGION…	F:GO:0005515	F:protein binding
TRUE	[INTERPRO, BLASTED]	scaffold_000058F_transcript_id_16324seq_length_529	immediate early response 3-interacting protein 1	529	20	1.35744e-36	87.1						IPR013880 (PFAM); IPR013880 (PANTHER); PTHR15858:SF0 (PANTHER); SIGNAL_PEPTIDE_N_REGION (PHOBIUS); SIGNAL_PEPTIDE_C_REGION (PHOBIUS); NON_CYTOPLASMIC_DOMAIN (PHOBIUS); SIGNAL_PEPTIDE (PHOBIUS); SIGNAL_PEPTIDE_H_REGION (PHOBIUS); SignalP-noTM (SIGNALP_EUK)	no GO terms	no GO terms
TRUE	[INTERPRO, BLASTED, MAPPED, GO-SLIM]	scaffold_000981F_transcript_id_1612seq_length_1996	transformer-2 protein homolog beta-like isoform X2	1996	20	2.55553e-92	91.17	1	F:GO:0003723	F:RNA binding			IPR000504 (SMART); IPR000504 (PFAM); IPR012677 (G3DSA:3.30.70.GENE3D); mobidb-lite (MOBIDB_LITE); mobidb-lite (MOBIDB_LITE); mobidb-lite (MOBIDB_LITE); mobidb-lite (MOBIDB_LITE); PTHR15241 (PANTHER); PTHR15241:SF1 (PANTHER); IPR000504 (PROSITE_PROFILES); cd12363 (CDD); IPR035979 (SUPERFAMILY)	F:GO:0003676	F:nucleic acid binding
TRUE	[INTERPRO, BLASTED, MAPPED, GO-SLIM]	scaffold_000125F_transcript_id_12435seq_length_2697	glutaryl-CoA dehydrogenase, mitochondrial	2697	20	0	87.43	6	C:GO:0005739; P:GO:0006629; P:GO:0009056; F:GO:0016491; F:GO:0043167; P:GO:0044281	C:mitochondrion; P:lipid metabolic process; P:catabolic process; F:oxidoreductase activity; F:ion binding; P:small molecule metabolic process	EC:1.3.99.3	Acting on the CH-CH group of donors	IPR009075 (PFAM); IPR037069 (G3DSA:1.10.540.GENE3D); IPR006091 (PFAM); IPR013786 (PFAM); G3DSA:2.40.110.10 (GENE3D); G3DSA:1.20.140.10 (GENE3D); PTHR42807 (PANTHER); IPR006089 (PROSITE_PATTERNS); IPR006089 (PROSITE_PATTERNS); cd01151 (CDD); IPR009100 (SUPERFAMILY); IPR036250 (SUPERFAMILY)	F:GO:0003995; F:GO:0016627; F:GO:0050660; P:GO:0055114	F:acyl-CoA dehydrogenase activity; F:oxidoreductase activity, acting on the CH-CH group of donors; F:flavin adenine dinucleotide binding; P:oxidation-reduction process
TRUE	[INTERPRO, BLASTED, MAPPED, GO-SLIM]	scaffold_000068F_transcript_id_17672seq_length_2094	proclotting enzyme-like	2094	20	0	85.49	1	F:GO:0008233	F:peptidase activity	EC:3.4.21	Acting on peptide bonds (peptidases)	IPR001314 (PRINTS); IPR001254 (SMART); G3DSA:2.40.10.10 (GENE3D); IPR001254 (PFAM); mobidb-lite (MOBIDB_LITE); mobidb-lite (MOBIDB_LITE); PTHR24256 (PANTHER); IPR033116 (PROSITE_PATTERNS); IPR018114 (PROSITE_PATTERNS); SIGNAL_PEPTIDE_H_REGION (PHOBIUS); SIGNAL_PEPTIDE (PHOBIUS); SIGNAL_PEPTIDE_N_REGION (PHOBIUS); SIGNAL_PEPTIDE_C_REGION (PHOBIUS); NON_CYTOPLASMIC_DOMAIN (PHOBIUS); IPR001254 (PROS…	F:GO:0004252; P:GO:0006508	F:serine-type endopeptidase activity; P:proteolysis
TRUE	[INTERPRO, BLASTED, MAPPED, GO-SLIM]	scaffold_000101F_transcript_id_11363seq_length_1154	cdc42 homolog	1154	20	4.95664e-122	97.93	4	F:GO:0003924; C:GO:0005622; P:GO:0007165; F:GO:0043167	F:GTPase activity; C:intracellular; P:signal transduction; F:ion binding	EC:3.6.1.15	Nucleoside-triphosphate phosphatase	PR00449 (PRINTS); SM00175 (SMART); SM00174 (SMART); SM00173 (SMART); IPR005225 (TIGRFAM); IPR001806 (PFAM); G3DSA:3.40.50.300 (GENE3D); PTHR24072 (PANTHER); PTHR24072:SF129 (PANTHER); IPR003578 (PROSITE_PROFILES); IPR037874 (CDD); IPR027417 (SUPERFAMILY)	F:GO:0003924; F:GO:0005525; C:GO:0005622; P:GO:0007264	F:GTPase activity; F:GTP binding; C:intracellular; P:small GTPase mediated signal transduction
TRUE	[INTERPRO, BLASTED, MAPPED]	scaffold_000062F_transcript_id_19252seq_length_2497	thiamine transporter 2-like	2497	20	0	61.11	5	C:GO:0016020; C:GO:0016021; P:GO:0035461; P:GO:0051180; F:GO:0090482	C:membrane; C:integral component of membrane; P:vitamin transmembrane transport; P:vitamin transport; F:vitamin transmembrane transporter activity			IPR002666 (PFAM); IPR002666 (PANTHER); TRANSMEMBRANE (PHOBIUS); CYTOPLASMIC_DOMAIN (PHOBIUS); TRANSMEMBRANE (PHOBIUS); NON_CYTOPLASMIC_DOMAIN (PHOBIUS); TRANSMEMBRANE (PHOBIUS); CYTOPLASMIC_DOMAIN (PHOBIUS); NON_CYTOPLASMIC_DOMAIN (PHOBIUS); CYTOPLASMIC_DOMAIN (PHOBIUS); TRANSMEMBRANE (PHOBIUS); TRANSMEMBRANE (PHOBIUS); TRANSMEMBRANE (PHOBIUS); NON_CYTOPLASMIC_DOMAIN (PHOBIUS); CYTOPLASMIC_DOMAIN…	C:GO:0016021; P:GO:0051180; F:GO:0090482	C:integral component of membrane; P:vitamin transport; F:vitamin transmembrane transporter activity
TRUE	[INTERPRO, BLASTED]	scaffold_000005F_transcript_id_23832seq_length_7873-1	tetratricopeptide repeat protein	7873	20	0	62.64						IPR002110 (PRINTS); IPR002110 (SMART); IPR020683 (PFAM); IPR036770 (G3DSA:1.25.40.GENE3D); IPR036770 (G3DSA:1.25.40.GENE3D); IPR011990 (G3DSA:1.25.40.GENE3D); IPR036770 (G3DSA:1.25.40.GENE3D); IPR036770 (G3DSA:1.25.40.GENE3D); PF13424 (PFAM); IPR036770 (G3DSA:1.25.40.GENE3D); IPR036770 (G3DSA:1.25.40.GENE3D); IPR036770 (G3DSA:1.25.40.GENE3D); PTHR43928 (PANTHER); IPR002110 (PROSITE_PROFILES); IPR…	F:GO:0005515	F:protein binding
TRUE	[INTERPRO, BLASTED, MAPPED, GO-SLIM]	scaffold_000058F_transcript_id_16463seq_length_1278	activating transcription factor of chaperone isoform X2	1278	20	2.37617e-165	75.1	5	F:GO:0003700; C:GO:0005622; P:GO:0009058; C:GO:0032991; P:GO:0034641	F:DNA-binding transcription factor activity; C:intracellular; P:biosynthetic process; C:protein-containing complex; P:cellular nitrogen compound metabolic process			Coil (COILS); IPR004827 (SMART); G3DSA:1.20.5.170 (GENE3D); IPR004827 (PFAM); mobidb-lite (MOBIDB_LITE); mobidb-lite (MOBIDB_LITE); PTHR13044 (PANTHER); IPR004827 (PROSITE_PATTERNS); IPR004827 (PROSITE_PROFILES); cd14692 (CDD); SSF57959 (SUPERFAMILY)	F:GO:0003700; P:GO:0006355	F:DNA-binding transcription factor activity; P:regulation of transcription, DNA-templated
TRUE	[INTERPRO, BLASTED, MAPPED, GO-SLIM]	scaffold_000190F_transcript_id_11052seq_length_1006	xyloside xylosyltransferase 1	1006	20	0	79.72	1	C:GO:0005575	C:cellular_component			IPR029044 (G3DSA:3.90.550.GENE3D); PTHR12270:SF17 (PANTHER); PTHR12270 (PANTHER); IPR029044 (SUPERFAMILY)	no GO terms	no GO terms
TRUE	[INTERPRO, BLASTED]	scaffold_000100F_transcript_id_15572seq_length_1617	facilitated trehalose transporter Tret1-like	1617	20	0	65.95						IPR005828 (PFAM); G3DSA:1.20.1250.20 (GENE3D); mobidb-lite (MOBIDB_LITE); PTHR23500:SF37 (PANTHER); PTHR23500 (PANTHER); CYTOPLASMIC_DOMAIN (PHOBIUS); CYTOPLASMIC_DOMAIN (PHOBIUS); NON_CYTOPLASMIC_DOMAIN (PHOBIUS); TRANSMEMBRANE (PHOBIUS); TRANSMEMBRANE (PHOBIUS); NON_CYTOPLASMIC_DOMAIN (PHOBIUS); TRANSMEMBRANE (PHOBIUS); TRANSMEMBRANE (PHOBIUS); NON_CYTOPLASMIC_DOMAIN (PHOBIUS); CYTOPLASMIC_DOMA…	C:GO:0016021; F:GO:0022857; P:GO:0055085	C:integral component of membrane; F:transmembrane transporter activity; P:transmembrane transport
TRUE	[INTERPRO, BLASTED]	scaffold_000172F_transcript_id_7998seq_length_1525	facilitated trehalose transporter Tret1-like isoform X1	1525	20	0	66.4						IPR003663 (PRINTS); G3DSA:1.20.1250.20 (GENE3D); IPR005828 (PFAM); PTHR23500 (PANTHER); PTHR23500:SF11 (PANTHER); CYTOPLASMIC_DOMAIN (PHOBIUS); CYTOPLASMIC_DOMAIN (PHOBIUS); TRANSMEMBRANE (PHOBIUS); CYTOPLASMIC_DOMAIN (PHOBIUS); NON_CYTOPLASMIC_DOMAIN (PHOBIUS); CYTOPLASMIC_DOMAIN (PHOBIUS); NON_CYTOPLASMIC_DOMAIN (PHOBIUS); TRANSMEMBRANE (PHOBIUS); NON_CYTOPLASMIC_DOMAIN (PHOBIUS); NON_CYTOPLASM…	C:GO:0016020; C:GO:0016021; F:GO:0022857; P:GO:0055085	C:membrane; C:integral component of membrane; F:transmembrane transporter activity; P:transmembrane transport
TRUE	[INTERPRO, BLASTED, MAPPED]	scaffold_000116F_transcript_id_18428seq_length_1678	ester hydrolase C11orf54 homolog	1678	20	0	74.51	2	C:GO:0005634; F:GO:0016787	C:nucleus; F:hydrolase activity			IPR015021 (SMART); IPR015021 (PFAM); IPR015021 (PANTHER); SSF117856 (SUPERFAMILY)	C:GO:0005634	C:nucleus
TRUE	[INTERPRO, BLASTED]	scaffold_000283F_transcript_id_3707seq_length_1596	UDP-glucuronosyltransferase 2B7-like isoform X3	1596	20	0	79.44						G3DSA:3.40.50.2000 (GENE3D); IPR002213 (PFAM); PTHR11926:SF151 (PANTHER); PTHR11926 (PANTHER); SIGNAL_PEPTIDE_C_REGION (PHOBIUS); SIGNAL_PEPTIDE_N_REGION (PHOBIUS); CYTOPLASMIC_DOMAIN (PHOBIUS); NON_CYTOPLASMIC_DOMAIN (PHOBIUS); SIGNAL_PEPTIDE (PHOBIUS); SIGNAL_PEPTIDE_H_REGION (PHOBIUS); TRANSMEMBRANE (PHOBIUS); PS51257 (PROSITE_PROFILES); SignalP-TM (SIGNALP_EUK); SignalP-TM (SIGNALP_GRAM_POSIT…	P:GO:0008152; F:GO:0016758	P:metabolic process; F:transferase activity, transferring hexosyl groups
TRUE	[INTERPRO, BLASTED, MAPPED]	scaffold_000010F_transcript_id_23268seq_length_2367	maltase 2-like	2367	20	0	71.45	2	F:GO:0003824; P:GO:0005975	F:catalytic activity; P:carbohydrate metabolic process			IPR006047 (SMART); G3DSA:3.90.400.10 (GENE3D); IPR006047 (PFAM); G3DSA:3.20.20.80 (GENE3D); PTHR10357 (PANTHER); PTHR10357:SF177 (PANTHER); SIGNAL_PEPTIDE_N_REGION (PHOBIUS); SIGNAL_PEPTIDE_C_REGION (PHOBIUS); SIGNAL_PEPTIDE (PHOBIUS); NON_CYTOPLASMIC_DOMAIN (PHOBIUS); SIGNAL_PEPTIDE_H_REGION (PHOBIUS); TRANSMEMBRANE (PHOBIUS); CYTOPLASMIC_DOMAIN (PHOBIUS); cd11328 (CDD); SignalP-TM (SIGNALP_GRAM…	F:GO:0003824; P:GO:0005975	F:catalytic activity; P:carbohydrate metabolic process
TRUE	[INTERPRO, BLASTED, MAPPED]	scaffold_000347F_transcript_id_7851seq_length_3242	dorsal-ventral patterning protein Sog	3242	20	0	59.84	1	P:GO:0007275	P:multicellular organism development			IPR001007 (SMART); IPR001007 (PFAM); PTHR11339 (PANTHER); PTHR11339:SF285 (PANTHER); IPR001007 (PROSITE_PATTERNS); IPR001007 (PROSITE_PATTERNS); IPR001007 (PROSITE_PROFILES); IPR010895 (PROSITE_PROFILES); IPR001007 (PROSITE_PROFILES); IPR010895 (PROSITE_PROFILES); IPR010895 (PROSITE_PROFILES); SSF57603 (SUPERFAMILY); SSF57603 (SUPERFAMILY); SSF57603 (SUPERFAMILY)	F:GO:0005515	F:protein binding
TRUE	[INTERPRO, BLASTED, MAPPED, GO-SLIM]	scaffold_000182F_transcript_id_3551seq_length_3382	cationic amino acid transporter 3	3382	20	0	72.5	1	C:GO:0005575	C:cellular_component			IPR002293 (PIRSF); IPR002293 (PFAM); G3DSA:1.20.1740.10 (GENE3D); IPR029485 (PFAM); PTHR43243 (PANTHER); PTHR43243:SF42 (PANTHER); NON_CYTOPLASMIC_DOMAIN (PHOBIUS); TRANSMEMBRANE (PHOBIUS); TRANSMEMBRANE (PHOBIUS); CYTOPLASMIC_DOMAIN (PHOBIUS); TRANSMEMBRANE (PHOBIUS); CYTOPLASMIC_DOMAIN (PHOBIUS); NON_CYTOPLASMIC_DOMAIN (PHOBIUS); CYTOPLASMIC_DOMAIN (PHOBIUS); TRANSMEMBRANE (PHOBIUS); TRANSMEMBR…	C:GO:0016020; F:GO:0022857; P:GO:0055085	C:membrane; F:transmembrane transporter activity; P:transmembrane transport
TRUE	[INTERPRO, BLASTED, MAPPED]	scaffold_000019F_transcript_id_21641seq_length_416	proton-coupled amino acid transporter-like protein CG1139	416	20	8.16397e-77	74.51	2	C:GO:0016020; C:GO:0016021	C:membrane; C:integral component of membrane			IPR013057 (PFAM); PTHR22950 (PANTHER); PTHR22950:SF340 (PANTHER); CYTOPLASMIC_DOMAIN (PHOBIUS); TRANSMEMBRANE (PHOBIUS); SIGNAL_PEPTIDE_H_REGION (PHOBIUS); SIGNAL_PEPTIDE (PHOBIUS); SIGNAL_PEPTIDE_N_REGION (PHOBIUS); NON_CYTOPLASMIC_DOMAIN (PHOBIUS); TRANSMEMBRANE (PHOBIUS); CYTOPLASMIC_DOMAIN (PHOBIUS); NON_CYTOPLASMIC_DOMAIN (PHOBIUS); TRANSMEMBRANE (PHOBIUS); SIGNAL_PEPTIDE_C_REGION (PHOBIUS);…	no GO terms	no GO terms
TRUE	[INTERPRO, BLASTED]	scaffold_000023F_transcript_id_21242seq_length_2383	UDP-glucuronosyltransferase 2B18-like	2383	20	0	76.73						G3DSA:3.40.50.2000 (GENE3D); G3DSA:3.40.50.2000 (GENE3D); IPR002213 (PFAM); PTHR11926:SF151 (PANTHER); PTHR11926 (PANTHER); TRANSMEMBRANE (PHOBIUS); CYTOPLASMIC_DOMAIN (PHOBIUS); SIGNAL_PEPTIDE_C_REGION (PHOBIUS); SIGNAL_PEPTIDE (PHOBIUS); NON_CYTOPLASMIC_DOMAIN (PHOBIUS); SIGNAL_PEPTIDE_N_REGION (PHOBIUS); SIGNAL_PEPTIDE_H_REGION (PHOBIUS); PS51257 (PROSITE_PROFILES); SignalP-noTM (SIGNALP_EUK);…	P:GO:0008152; F:GO:0016758	P:metabolic process; F:transferase activity, transferring hexosyl groups
TRUE	[INTERPRO, BLASTED]	scaffold_000084F_transcript_id_17867seq_length_1339	cuticle protein 7-like	1339	20	4.37293e-35	87.72						IPR000618 (PFAM); PTHR12236:SF46 (PANTHER); PTHR12236 (PANTHER); SIGNAL_PEPTIDE_N_REGION (PHOBIUS); SIGNAL_PEPTIDE_C_REGION (PHOBIUS); SIGNAL_PEPTIDE (PHOBIUS); SIGNAL_PEPTIDE_H_REGION (PHOBIUS); NON_CYTOPLASMIC_DOMAIN (PHOBIUS); PS51257 (PROSITE_PROFILES); IPR000618 (PROSITE_PROFILES); SignalP-noTM (SIGNALP_GRAM_NEGATIVE); SignalP-noTM (SIGNALP_EUK); SignalP-TM (SIGNALP_GRAM_POSITIVE)	F:GO:0042302	F:structural constituent of cuticle
TRUE	[INTERPRO, BLASTED, MAPPED]	scaffold_000001F_transcript_id_25955seq_length_1248	putative cysteine proteinase CG12163	1248	20	0	65.38	6	F:GO:0004869; P:GO:0006508; F:GO:0008233; F:GO:0008234; P:GO:0010951; F:GO:0016787	F:cysteine-type endopeptidase inhibitor activity; P:proteolysis; F:peptidase activity; F:cysteine-type peptidase activity; P:negative regulation of endopeptidase activity; F:hydrolase activity			IPR000668 (SMART); IPR013201 (SMART); IPR000668 (PFAM); IPR013201 (PFAM); G3DSA:3.90.70.10 (GENE3D); IPR013128 (PANTHER); IPR033158 (PTHR12411:PANTHER); NON_CYTOPLASMIC_DOMAIN (PHOBIUS); SIGNAL_PEPTIDE_N_REGION (PHOBIUS); SIGNAL_PEPTIDE (PHOBIUS); SIGNAL_PEPTIDE_H_REGION (PHOBIUS); SIGNAL_PEPTIDE_C_REGION (PHOBIUS); IPR039417 (CDD); SignalP-TM (SIGNALP_GRAM_POSITIVE); SignalP-noTM (SIGNALP_EUK); …	P:GO:0006508; F:GO:0008234	P:proteolysis; F:cysteine-type peptidase activity
TRUE	[INTERPRO, BLASTED, MAPPED]	scaffold_000108F_transcript_id_14176seq_length_3694	GPI ethanolamine phosphate transferase 3	3694	20	0	62.49	7	F:GO:0003824; P:GO:0006506; P:GO:0008152; C:GO:0016020; C:GO:0016021; F:GO:0016740; F:GO:0051377	F:catalytic activity; P:GPI anchor biosynthetic process; P:metabolic process; C:membrane; C:integral component of membrane; F:transferase activity; F:mannose-ethanolamine phosphotransferase activity			IPR002591 (PFAM); IPR017849 (G3DSA:3.40.720.GENE3D); PTHR23071 (PANTHER); TRANSMEMBRANE (PHOBIUS); CYTOPLASMIC_DOMAIN (PHOBIUS); NON_CYTOPLASMIC_DOMAIN (PHOBIUS); NON_CYTOPLASMIC_DOMAIN (PHOBIUS); CYTOPLASMIC_DOMAIN (PHOBIUS); TRANSMEMBRANE (PHOBIUS); NON_CYTOPLASMIC_DOMAIN (PHOBIUS); TRANSMEMBRANE (PHOBIUS); NON_CYTOPLASMIC_DOMAIN (PHOBIUS); NON_CYTOPLASMIC_DOMAIN (PHOBIUS); TRANSMEMBRANE (PHOBI…	F:GO:0003824; P:GO:0006506; P:GO:0008152; F:GO:0051377	F:catalytic activity; P:GPI anchor biosynthetic process; P:metabolic process; F:mannose-ethanolamine phosphotransferase activity
TRUE	[INTERPRO, BLASTED, MAPPED]	scaffold_000048F_transcript_id_16433seq_length_1778	uncharacterized oxidoreductase dhs-27-like	1778	20	0	66.88	1	F:GO:0016740	F:transferase activity			IPR015897 (SMART); IPR004119 (PFAM); G3DSA:3.90.1200.10 (GENE3D); mobidb-lite (MOBIDB_LITE); PTHR11012 (PANTHER); PTHR11012:SF47 (PANTHER); IPR011009 (SUPERFAMILY)	no GO terms	no GO terms
TRUE	[INTERPRO, BLASTED, MAPPED]	scaffold_000127F_transcript_id_13047seq_length_1683	transcription factor SOX-14-like	1683	20	4.29922e-127	68.13	2	F:GO:0003677; C:GO:0005634	F:DNA binding; C:nucleus			IPR009071 (SMART); IPR036910 (G3DSA:1.10.30.GENE3D); IPR009071 (PFAM); mobidb-lite (MOBIDB_LITE); PTHR10270:SF285 (PANTHER); PTHR10270 (PANTHER); IPR009071 (PROSITE_PROFILES); cd01388 (CDD); IPR036910 (SUPERFAMILY)	no GO terms	no GO terms
TRUE	[INTERPRO, BLASTED, MAPPED, GO-SLIM]	scaffold_000080F_transcript_id_10553seq_length_3188	nose resistant to fluoxetine protein 6-like	3188	20	0	56.07	1	F:GO:0003674	F:molecular_function			IPR006621 (SMART); IPR002656 (PFAM); PTHR11161 (PANTHER); CYTOPLASMIC_DOMAIN (PHOBIUS); TRANSMEMBRANE (PHOBIUS); SIGNAL_PEPTIDE_C_REGION (PHOBIUS); TRANSMEMBRANE (PHOBIUS); CYTOPLASMIC_DOMAIN (PHOBIUS); CYTOPLASMIC_DOMAIN (PHOBIUS); NON_CYTOPLASMIC_DOMAIN (PHOBIUS); SIGNAL_PEPTIDE_N_REGION (PHOBIUS); TRANSMEMBRANE (PHOBIUS); CYTOPLASMIC_DOMAIN (PHOBIUS); NON_CYTOPLASMIC_DOMAIN (PHOBIUS); NON_CYTO…	F:GO:0016747	F:transferase activity, transferring acyl groups other than amino-acyl groups
TRUE	[INTERPRO, BLASTED, MAPPED, GO-SLIM]	scaffold_000138F_transcript_id_2724seq_length_5607	solute carrier family 23 member 2	5607	20	0	85.3	2	C:GO:0005575; F:GO:0022857	C:cellular_component; F:transmembrane transporter activity			IPR006043 (PFAM); PTHR11119:SF3 (PANTHER); PTHR11119 (PANTHER); IPR006042 (PROSITE_PATTERNS); TRANSMEMBRANE (PHOBIUS); NON_CYTOPLASMIC_DOMAIN (PHOBIUS); NON_CYTOPLASMIC_DOMAIN (PHOBIUS); TRANSMEMBRANE (PHOBIUS); NON_CYTOPLASMIC_DOMAIN (PHOBIUS); NON_CYTOPLASMIC_DOMAIN (PHOBIUS); CYTOPLASMIC_DOMAIN (PHOBIUS); CYTOPLASMIC_DOMAIN (PHOBIUS); NON_CYTOPLASMIC_DOMAIN (PHOBIUS); NON_CYTOPLASMIC_DOMAIN (P…	F:GO:0005215; C:GO:0016020; F:GO:0022857; P:GO:0055085	F:transporter activity; C:membrane; F:transmembrane transporter activity; P:transmembrane transport
TRUE	[INTERPRO, BLASTED, MAPPED]	scaffold_000937F_transcript_id_6955seq_length_1923	dynein regulatory complex protein 1	1923	20	0	67.76	1	F:GO:0003676	F:nucleic acid binding			Coil (COILS); IPR029440 (PFAM); PTHR21625 (PANTHER); PTHR21625 (PANTHER); PTHR21625:SF1 (PANTHER); PTHR21625:SF1 (PANTHER)	no GO terms	no GO terms
TRUE	[INTERPRO, BLASTED]	scaffold_000044F_transcript_id_15481seq_length_2357	facilitated trehalose transporter Tret1-like	2357	20	0	76.13						G3DSA:1.20.1250.20 (GENE3D); IPR005828 (PFAM); PTHR23500:SF11 (PANTHER); PTHR23500 (PANTHER); TRANSMEMBRANE (PHOBIUS); NON_CYTOPLASMIC_DOMAIN (PHOBIUS); TRANSMEMBRANE (PHOBIUS); TRANSMEMBRANE (PHOBIUS); TRANSMEMBRANE (PHOBIUS); CYTOPLASMIC_DOMAIN (PHOBIUS); NON_CYTOPLASMIC_DOMAIN (PHOBIUS); CYTOPLASMIC_DOMAIN (PHOBIUS); TRANSMEMBRANE (PHOBIUS); TRANSMEMBRANE (PHOBIUS); TRANSMEMBRANE (PHOBIUS); CY…	C:GO:0016021; F:GO:0022857; P:GO:0055085	C:integral component of membrane; F:transmembrane transporter activity; P:transmembrane transport
TRUE	[INTERPRO, BLASTED]	scaffold_000745F_transcript_id_810seq_length_1911	facilitated trehalose transporter Tret1-like	1911	20	0	60.18						G3DSA:1.20.1250.20 (GENE3D); IPR005828 (PFAM); PTHR23500 (PANTHER); PTHR23500:SF11 (PANTHER); CYTOPLASMIC_DOMAIN (PHOBIUS); NON_CYTOPLASMIC_DOMAIN (PHOBIUS); TRANSMEMBRANE (PHOBIUS); CYTOPLASMIC_DOMAIN (PHOBIUS); TRANSMEMBRANE (PHOBIUS); CYTOPLASMIC_DOMAIN (PHOBIUS); TRANSMEMBRANE (PHOBIUS); NON_CYTOPLASMIC_DOMAIN (PHOBIUS); TRANSMEMBRANE (PHOBIUS); TRANSMEMBRANE (PHOBIUS); CYTOPLASMIC_DOMAIN (PH…	C:GO:0016021; F:GO:0022857; P:GO:0055085	C:integral component of membrane; F:transmembrane transporter activity; P:transmembrane transport
TRUE	[INTERPRO, BLASTED, MAPPED, GO-SLIM]	scaffold_000106F_transcript_id_12397seq_length_1257	cathepsin B	1257	20	0	63.17	1	F:GO:0008233	F:peptidase activity			IPR000668 (PRINTS); IPR000668 (SMART); G3DSA:3.90.70.10 (GENE3D); IPR000668 (PFAM); IPR013128 (PANTHER); PTHR12411:SF369 (PANTHER); IPR025660 (PROSITE_PATTERNS); IPR000169 (PROSITE_PATTERNS); CYTOPLASMIC_DOMAIN (PHOBIUS); NON_CYTOPLASMIC_DOMAIN (PHOBIUS); TRANSMEMBRANE (PHOBIUS); cd02620 (CDD); IPR038765 (SUPERFAMILY); TMhelix (TMHMM)	P:GO:0006508; F:GO:0008234	P:proteolysis; F:cysteine-type peptidase activity
TRUE	[INTERPRO, BLASTED]	scaffold_000696F_transcript_id_9505seq_length_1697	MIP18 family protein CG30152 isoform X2	1697	20	1.2472e-72	81.61						IPR034904 (G3DSA:3.30.300.GENE3D); IPR002744 (PFAM); PTHR12377 (PANTHER); PTHR12377:SF2 (PANTHER); IPR034904 (SUPERFAMILY)	no GO terms	no GO terms
TRUE	[INTERPRO, BLASTED, MAPPED, GO-SLIM]	scaffold_000336F_transcript_id_9617seq_length_2883	septin-2 isoform X2	2883	20	0	95.27	8	P:GO:0005975; P:GO:0006091; P:GO:0009058; F:GO:0016791; P:GO:0034655; F:GO:0043167; P:GO:0044281; P:GO:0051186	P:carbohydrate metabolic process; P:generation of precursor metabolites and energy; P:biosynthetic process; F:phosphatase activity; P:nucleobase-containing compound catabolic process; F:ion binding; P:small molecule metabolic process; P:cofactor metabolic process	EC:3.1.3.23; EC:3.1.3.11; EC:3.1.3.41	Sugar-phosphatase; Fructose-bisphosphatase; 4-nitrophenylphosphatase	Coil (COILS); IPR016491 (PIRSF); G3DSA:3.40.50.300 (GENE3D); IPR030379 (PFAM); mobidb-lite (MOBIDB_LITE); PTHR18884 (PANTHER); PTHR18884:SF109 (PANTHER); IPR030379 (PROSITE_PROFILES); IPR016491 (CDD); IPR027417 (SUPERFAMILY)	F:GO:0005525	F:GTP binding
TRUE	[INTERPRO, BLASTED, MAPPED]	scaffold_000193F_transcript_id_4696seq_length_1816	ragulator complex protein LAMTOR4 homolog	1816	20	3.38428e-57	76.55	3	P:GO:0032008; P:GO:0071230; C:GO:0071986	P:positive regulation of TOR signaling; P:cellular response to amino acid stimulus; C:Ragulator complex			IPR004942 (PFAM); G3DSA:3.30.450.30 (GENE3D); IPR034601 (PANTHER); SSF103196 (SUPERFAMILY)	P:GO:0032008; P:GO:0071230; C:GO:0071986	P:positive regulation of TOR signaling; P:cellular response to amino acid stimulus; C:Ragulator complex
TRUE	[INTERPRO, BLASTED, MAPPED, GO-SLIM]	scaffold_000259F_transcript_id_14671seq_length_2426	peptide methionine sulfoxide reductase isoform X2	2426	20	1.14869e-154	78.73	2	P:GO:0006464; F:GO:0016491	P:cellular protein modification process; F:oxidoreductase activity	EC:1.8.4.11	Peptide-methionine (S)-S-oxide reductase	IPR002569 (TIGRFAM); IPR036509 (G3DSA:3.30.1060.GENE3D); IPR002569 (PFAM); PTHR42799:SF2 (PANTHER); PTHR42799 (PANTHER); IPR002569 (HAMAP); IPR036509 (SUPERFAMILY)	F:GO:0008113; P:GO:0055114	F:peptide-methionine (S)-S-oxide reductase activity; P:oxidation-reduction process
TRUE	[INTERPRO, BLASTED]	scaffold_000162F_transcript_id_7692seq_length_2555	venom serine carboxypeptidase-like	2555	20	0	61.12						IPR001563 (PRINTS); IPR001563 (PFAM); IPR029058 (G3DSA:3.40.50.GENE3D); PTHR11802:SF98 (PANTHER); IPR001563 (PANTHER); NON_CYTOPLASMIC_DOMAIN (PHOBIUS); SIGNAL_PEPTIDE (PHOBIUS); SIGNAL_PEPTIDE_H_REGION (PHOBIUS); SIGNAL_PEPTIDE_C_REGION (PHOBIUS); SIGNAL_PEPTIDE_N_REGION (PHOBIUS); SignalP-noTM (SIGNALP_EUK); IPR029058 (SUPERFAMILY)	F:GO:0004185; P:GO:0006508	F:serine-type carboxypeptidase activity; P:proteolysis
TRUE	[INTERPRO, BLASTED, MAPPED, GO-SLIM]	scaffold_000376F_transcript_id_2286seq_length_1216	pyrroline-5-carboxylate reductase	1216	20	0	67.77	2	P:GO:0006520; P:GO:0009058	P:cellular amino acid metabolic process; P:biosynthetic process			G3DSA:3.40.50.720 (GENE3D); IPR028939 (PFAM); IPR029036 (PFAM); G3DSA:1.10.3730.10 (GENE3D); IPR000304 (PIRSF); IPR000304 (TIGRFAM); PTHR11645 (PANTHER); PTHR11645:SF46 (PANTHER); IPR000304 (PROSITE_PATTERNS); SIGNAL_PEPTIDE_C_REGION (PHOBIUS); SIGNAL_PEPTIDE_N_REGION (PHOBIUS); NON_CYTOPLASMIC_DOMAIN (PHOBIUS); SIGNAL_PEPTIDE (PHOBIUS); SIGNAL_PEPTIDE_H_REGION (PHOBIUS); IPR000304 (HAMAP); IPR03…	F:GO:0004735; P:GO:0006561; P:GO:0055114	F:pyrroline-5-carboxylate reductase activity; P:proline biosynthetic process; P:oxidation-reduction process
TRUE	[INTERPRO, BLASTED, MAPPED]	scaffold_000019F_transcript_id_21631seq_length_2417	proton-coupled amino acid transporter-like protein CG1139	2417	20	0	68.34	2	C:GO:0016020; C:GO:0016021	C:membrane; C:integral component of membrane			IPR013057 (PFAM); PTHR22950 (PANTHER); PTHR22950:SF340 (PANTHER); TRANSMEMBRANE (PHOBIUS); TRANSMEMBRANE (PHOBIUS); TRANSMEMBRANE (PHOBIUS); TRANSMEMBRANE (PHOBIUS); CYTOPLASMIC_DOMAIN (PHOBIUS); TRANSMEMBRANE (PHOBIUS); CYTOPLASMIC_DOMAIN (PHOBIUS); NON_CYTOPLASMIC_DOMAIN (PHOBIUS); CYTOPLASMIC_DOMAIN (PHOBIUS); TRANSMEMBRANE (PHOBIUS); TRANSMEMBRANE (PHOBIUS); NON_CYTOPLASMIC_DOMAIN (PHOBIUS); …	no GO terms	no GO terms
TRUE	[INTERPRO, BLASTED, MAPPED, GO-SLIM]	scaffold_000186F_transcript_id_10655seq_length_2229	PREDICTED: uncharacterized protein LOC109038185 isoform X2	2229	20	0	80.32	3	F:GO:0003674; P:GO:0034641; P:GO:0044281	F:molecular_function; P:cellular nitrogen compound metabolic process; P:small molecule metabolic process			PTHR21234 (PANTHER); PTHR21234:SF16 (PANTHER); IPR035994 (SUPERFAMILY)	F:GO:0003824; P:GO:0009116	F:catalytic activity; P:nucleoside metabolic process
TRUE	[INTERPRO, BLASTED, MAPPED, GO-SLIM]	scaffold_000623F_transcript_id_4344seq_length_2091	amine sulfotransferase-like	2091	20	0	73.79	1	F:GO:0003674	F:molecular_function			IPR000863 (PFAM); G3DSA:3.40.50.300 (GENE3D); PTHR11783 (PANTHER); PTHR11783:SF150 (PANTHER); NON_CYTOPLASMIC_DOMAIN (PHOBIUS); SIGNAL_PEPTIDE_C_REGION (PHOBIUS); SIGNAL_PEPTIDE (PHOBIUS); SIGNAL_PEPTIDE_H_REGION (PHOBIUS); SIGNAL_PEPTIDE_N_REGION (PHOBIUS); SignalP-noTM (SIGNALP_EUK); IPR027417 (SUPERFAMILY); TMhelix (TMHMM)	F:GO:0008146	F:sulfotransferase activity
TRUE	[INTERPRO, BLASTED, MAPPED, GO-SLIM]	scaffold_000049F_transcript_id_12686seq_length_3578	FGGY carbohydrate kinase domain-containing protein	3578	20	0	76.03	2	F:GO:0003674; P:GO:0008150	F:molecular_function; P:biological_process			IPR000577 (PIRSF); G3DSA:3.30.420.460 (GENE3D); IPR018484 (PFAM); G3DSA:3.30.420.40 (GENE3D); IPR006003 (TIGRFAM); IPR018485 (PFAM); PTHR43435 (PANTHER); PTHR43435:SF4 (PANTHER); IPR006003 (CDD); SSF53067 (SUPERFAMILY); SSF53067 (SUPERFAMILY)	P:GO:0005975; F:GO:0016773	P:carbohydrate metabolic process; F:phosphotransferase activity, alcohol group as acceptor
TRUE	[INTERPRO, BLASTED]	scaffold_000569F_transcript_id_13459seq_length_1298	maltase A3-like	1298	20	0	68.25						G3DSA:3.20.20.80 (GENE3D); IPR006047 (PFAM); mobidb-lite (MOBIDB_LITE); PTHR10357:SF177 (PANTHER); PTHR10357 (PANTHER); CYTOPLASMIC_DOMAIN (PHOBIUS); TRANSMEMBRANE (PHOBIUS); NON_CYTOPLASMIC_DOMAIN (PHOBIUS); IPR017853 (SUPERFAMILY)	F:GO:0003824; P:GO:0005975	F:catalytic activity; P:carbohydrate metabolic process
TRUE	[INTERPRO, BLASTED, MAPPED]	scaffold_000019F_transcript_id_21730seq_length_1838	proton-coupled amino acid transporter-like protein CG1139	1838	20	0	73.64	2	C:GO:0016020; C:GO:0016021	C:membrane; C:integral component of membrane			IPR013057 (PFAM); mobidb-lite (MOBIDB_LITE); mobidb-lite (MOBIDB_LITE); PTHR22950 (PANTHER); PTHR22950:SF340 (PANTHER); CYTOPLASMIC_DOMAIN (PHOBIUS); CYTOPLASMIC_DOMAIN (PHOBIUS); NON_CYTOPLASMIC_DOMAIN (PHOBIUS); TRANSMEMBRANE (PHOBIUS); CYTOPLASMIC_DOMAIN (PHOBIUS); NON_CYTOPLASMIC_DOMAIN (PHOBIUS); TRANSMEMBRANE (PHOBIUS); TRANSMEMBRANE (PHOBIUS); TRANSMEMBRANE (PHOBIUS); TRANSMEMBRANE (PHOBIU…	no GO terms	no GO terms
TRUE	[INTERPRO, BLASTED, MAPPED]	scaffold_000078F_transcript_id_18399seq_length_3311	probable G-protein coupled receptor Mth-like 3	3311	20	0	50.85	7	F:GO:0004888; F:GO:0004930; P:GO:0006950; P:GO:0007166; P:GO:0007186; C:GO:0016020; C:GO:0016021	F:transmembrane signaling receptor activity; F:G-protein coupled receptor activity; P:response to stress; P:cell surface receptor signaling pathway; P:G-protein coupled receptor signaling pathway; C:membrane; C:integral component of membrane			IPR000832 (PFAM); G3DSA:1.20.1070.10 (GENE3D); mobidb-lite (MOBIDB_LITE); PTHR12011:SF349 (PANTHER); PTHR12011 (PANTHER); CYTOPLASMIC_DOMAIN (PHOBIUS); TRANSMEMBRANE (PHOBIUS); NON_CYTOPLASMIC_DOMAIN (PHOBIUS); TRANSMEMBRANE (PHOBIUS); CYTOPLASMIC_DOMAIN (PHOBIUS); SIGNAL_PEPTIDE (PHOBIUS); TRANSMEMBRANE (PHOBIUS); TRANSMEMBRANE (PHOBIUS); SIGNAL_PEPTIDE_H_REGION (PHOBIUS); CYTOPLASMIC_DOMAIN (PH…	F:GO:0004888; F:GO:0004930; P:GO:0007166; P:GO:0007186; C:GO:0016021	F:transmembrane signaling receptor activity; F:G-protein coupled receptor activity; P:cell surface receptor signaling pathway; P:G-protein coupled receptor signaling pathway; C:integral component of membrane
TRUE	[INTERPRO, BLASTED]	scaffold_000005F_transcript_id_23554seq_length_2000	UDP-glucuronosyltransferase 2B18-like	2000	20	0	62.62						IPR002213 (PFAM); G3DSA:3.40.50.2000 (GENE3D); G3DSA:3.40.50.2000 (GENE3D); PTHR11926:SF151 (PANTHER); PTHR11926 (PANTHER); IPR035595 (PROSITE_PATTERNS); NON_CYTOPLASMIC_DOMAIN (PHOBIUS); CYTOPLASMIC_DOMAIN (PHOBIUS); TRANSMEMBRANE (PHOBIUS); CYTOPLASMIC_DOMAIN (PHOBIUS); TRANSMEMBRANE (PHOBIUS); SSF53756 (SUPERFAMILY); TMhelix (TMHMM)	P:GO:0008152; F:GO:0016758	P:metabolic process; F:transferase activity, transferring hexosyl groups
TRUE	[INTERPRO, BLASTED, MAPPED, GO-SLIM]	scaffold_000036F_transcript_id_19258seq_length_2629	transient receptor potential cation channel subfamily A member 1	2629	20	0	81.13	2	C:GO:0005575; F:GO:0022857	C:cellular_component; F:transmembrane transporter activity			IPR005821 (PFAM); mobidb-lite (MOBIDB_LITE); IPR030288 (PANTHER); PTHR24190:SF11 (PANTHER); CYTOPLASMIC_DOMAIN (PHOBIUS); TRANSMEMBRANE (PHOBIUS); TRANSMEMBRANE (PHOBIUS); CYTOPLASMIC_DOMAIN (PHOBIUS); TRANSMEMBRANE (PHOBIUS); TRANSMEMBRANE (PHOBIUS); TRANSMEMBRANE (PHOBIUS); NON_CYTOPLASMIC_DOMAIN (PHOBIUS); TRANSMEMBRANE (PHOBIUS); CYTOPLASMIC_DOMAIN (PHOBIUS); NON_CYTOPLASMIC_DOMAIN (PHOBIUS);…	F:GO:0005216; P:GO:0006811; C:GO:0016020; C:GO:0016021; P:GO:0034220; P:GO:0055085	F:ion channel activity; P:ion transport; C:membrane; C:integral component of membrane; P:ion transmembrane transport; P:transmembrane transport
TRUE	[INTERPRO, BLASTED, MAPPED]	scaffold_000060F_transcript_id_14961seq_length_1242	L-xylulose reductase	1242	20	4.38311e-178	78.16	3	C:GO:0005575; F:GO:0016491; P:GO:0055114	C:cellular_component; F:oxidoreductase activity; P:oxidation-reduction process			IPR002347 (PRINTS); IPR002347 (PRINTS); G3DSA:3.40.50.720 (GENE3D); PF13561 (PFAM); PTHR44252 (PANTHER); IPR020904 (PROSITE_PATTERNS); IPR036291 (SUPERFAMILY)	F:GO:0016491	F:oxidoreductase activity
TRUE	[INTERPRO, BLASTED, MAPPED, GO-SLIM]	scaffold_000294F_transcript_id_13425seq_length_2078	trehalase-like isoform X1	2078	20	0	67.7	1	F:GO:0003674	F:molecular_function			IPR001661 (PRINTS); IPR001661 (PFAM); IPR012341 (G3DSA:1.50.10.GENE3D); PTHR23403:SF1 (PANTHER); IPR001661 (PANTHER); IPR018232 (PROSITE_PATTERNS); SIGNAL_PEPTIDE_H_REGION (PHOBIUS); SIGNAL_PEPTIDE_C_REGION (PHOBIUS); NON_CYTOPLASMIC_DOMAIN (PHOBIUS); SIGNAL_PEPTIDE_N_REGION (PHOBIUS); SIGNAL_PEPTIDE (PHOBIUS); SignalP-TM (SIGNALP_GRAM_POSITIVE); SignalP-noTM (SIGNALP_EUK); IPR008928 (SUPERFAMILY)	F:GO:0003824; F:GO:0004555; P:GO:0005991	F:catalytic activity; F:alpha,alpha-trehalase activity; P:trehalose metabolic process
TRUE	[INTERPRO, BLASTED, MAPPED, GO-SLIM]	scaffold_001130F_transcript_id_1293seq_length_1536	facilitated trehalose transporter Tret1-like	1536	20	6.44391e-48	64.19	2	C:GO:0005575; F:GO:0022857	C:cellular_component; F:transmembrane transporter activity			mobidb-lite (MOBIDB_LITE); NON_CYTOPLASMIC_DOMAIN (PHOBIUS); TRANSMEMBRANE (PHOBIUS); CYTOPLASMIC_DOMAIN (PHOBIUS); TMhelix (TMHMM)	no GO terms	no GO terms
TRUE	[INTERPRO, BLASTED, MAPPED, GO-SLIM]	scaffold_000094F_transcript_id_18892seq_length_1411	mitochondrial carrier protein Rim2	1411	20	4.12518e-57	70.58	2	C:GO:0005575; P:GO:0006810	C:cellular_component; P:transport			IPR018108 (PFAM); IPR023395 (G3DSA:1.50.40.GENE3D); IPR023395 (SUPERFAMILY); TMhelix (TMHMM)	no GO terms	no GO terms
TRUE	[INTERPRO, BLASTED, MAPPED, GO-SLIM]	scaffold_000299F_transcript_id_7828seq_length_2097	cytokine-inducible SH2-containing protein-like	2097	20	0	65.04	1	P:GO:0008150	P:biological_process			IPR000980 (PRINTS); IPR000980 (SMART); IPR036860 (G3DSA:3.30.505.GENE3D); IPR000980 (PFAM); mobidb-lite (MOBIDB_LITE); mobidb-lite (MOBIDB_LITE); PTHR44396:SF2 (PANTHER); IPR028410 (PANTHER); IPR000980 (PROSITE_PROFILES); cd09923 (CDD); IPR036860 (SUPERFAMILY)	P:GO:0001558; F:GO:0005159; C:GO:0005737; F:GO:0008269; P:GO:0046426	P:regulation of cell growth; F:insulin-like growth factor receptor binding; C:cytoplasm; F:JAK pathway signal transduction adaptor activity; P:negative regulation of JAK-STAT cascade
TRUE	[INTERPRO, BLASTED, MAPPED, GO-SLIM]	scaffold_000010F_transcript_id_22706seq_length_2501	calmodulin-like protein 4	2501	20	8.33889e-98	87.09	1	F:GO:0043167	F:ion binding			G3DSA:1.10.238.10 (GENE3D); G3DSA:1.10.238.10 (GENE3D); PTHR23050:SF169 (PANTHER); PTHR23050 (PANTHER); IPR002048 (CDD); IPR011992 (SUPERFAMILY)	F:GO:0005509	F:calcium ion binding
TRUE	[INTERPRO, BLASTED, MAPPED]	scaffold_000372F_transcript_id_2626seq_length_1901	facilitated trehalose transporter Tret1-like	1901	20	0	64.7	6	F:GO:0005215; P:GO:0008643; C:GO:0016020; C:GO:0016021; F:GO:0022857; P:GO:0055085	F:transporter activity; P:carbohydrate transport; C:membrane; C:integral component of membrane; F:transmembrane transporter activity; P:transmembrane transport			IPR003663 (PRINTS); IPR005828 (PFAM); G3DSA:1.20.1250.20 (GENE3D); PTHR23500 (PANTHER); PTHR23500:SF11 (PANTHER); TRANSMEMBRANE (PHOBIUS); CYTOPLASMIC_DOMAIN (PHOBIUS); TRANSMEMBRANE (PHOBIUS); NON_CYTOPLASMIC_DOMAIN (PHOBIUS); CYTOPLASMIC_DOMAIN (PHOBIUS); NON_CYTOPLASMIC_DOMAIN (PHOBIUS); CYTOPLASMIC_DOMAIN (PHOBIUS); CYTOPLASMIC_DOMAIN (PHOBIUS); TRANSMEMBRANE (PHOBIUS); TRANSMEMBRANE (PHOBIUS…	C:GO:0016020; C:GO:0016021; F:GO:0022857; P:GO:0055085	C:membrane; C:integral component of membrane; F:transmembrane transporter activity; P:transmembrane transport
TRUE	[INTERPRO, BLASTED, MAPPED, GO-SLIM]	scaffold_000222F_transcript_id_D3TRQ9.1seq_length_951	aldose reductase-like	951	20	0	80.05	1	F:GO:0016491	F:oxidoreductase activity			IPR020471 (PRINTS); IPR036812 (G3DSA:3.20.20.GENE3D); IPR023210 (PFAM); IPR020471 (PIRSF); PTHR11732:SF294 (PANTHER); IPR020471 (PANTHER); IPR018170 (PROSITE_PATTERNS); IPR018170 (PROSITE_PATTERNS); IPR018170 (PROSITE_PATTERNS); IPR023210 (CDD); IPR036812 (SUPERFAMILY)	F:GO:0016491; P:GO:0055114	F:oxidoreductase activity; P:oxidation-reduction process
TRUE	[INTERPRO, BLASTED, MAPPED]	scaffold_000097F_transcript_id_11262seq_length_2114	putative aminopeptidase W07G4.4	2114	20	0	70.85	7	F:GO:0004177; C:GO:0005622; C:GO:0005737; P:GO:0006508; F:GO:0008235; P:GO:0019538; F:GO:0030145	F:aminopeptidase activity; C:intracellular; C:cytoplasm; P:proteolysis; F:metalloexopeptidase activity; P:protein metabolic process; F:manganese ion binding			IPR011356 (PRINTS); G3DSA:3.40.630.10 (GENE3D); IPR000819 (PFAM); IPR011356 (PANTHER); PTHR11963:SF23 (PANTHER); IPR000819 (PROSITE_PATTERNS); SSF53187 (SUPERFAMILY)	F:GO:0004177; C:GO:0005622; C:GO:0005737; P:GO:0006508; F:GO:0008235; P:GO:0019538; F:GO:0030145	F:aminopeptidase activity; C:intracellular; C:cytoplasm; P:proteolysis; F:metalloexopeptidase activity; P:protein metabolic process; F:manganese ion binding
TRUE	[INTERPRO, BLASTED, MAPPED, GO-SLIM]	scaffold_000004F_transcript_id_23257seq_length_1277	glutaredoxin-C4-like isoform X1	1277	20	2.74071e-51	80.28	4	C:GO:0005623; P:GO:0006091; F:GO:0016491; P:GO:0042592	C:cell; P:generation of precursor metabolites and energy; F:oxidoreductase activity; P:homeostatic process			IPR014025 (PRINTS); IPR002109 (PFAM); G3DSA:3.40.30.10 (GENE3D); PTHR10168:SF184 (PANTHER); PTHR10168 (PANTHER); IPR011767 (PROSITE_PATTERNS); IPR002109 (PROSITE_PROFILES); cd03419 (CDD); IPR036249 (SUPERFAMILY)	F:GO:0009055; F:GO:0015035; P:GO:0045454	F:electron transfer activity; F:protein disulfide oxidoreductase activity; P:cell redox homeostasis
TRUE	[INTERPRO, BLASTED, MAPPED]	scaffold_000116F_transcript_id_C4WUU8.1seq_length_366	coiled-coil-helix-coiled-coil-helix domain-containing protein 1	366	20	2.29303e-62	62.46	4	C:GO:0005761; C:GO:0016020; C:GO:0016021; P:GO:0032543	C:mitochondrial ribosome; C:membrane; C:integral component of membrane; P:mitochondrial translation			IPR010625 (PFAM); G3DSA:1.10.287.1130 (GENE3D); IPR033620 (PANTHER); PS51808 (PROSITE_PROFILES); IPR009069 (SUPERFAMILY)	C:GO:0005761; P:GO:0032543	C:mitochondrial ribosome; P:mitochondrial translation
TRUE	[INTERPRO, BLASTED, MAPPED, GO-SLIM]	scaffold_000321F_transcript_id_15149seq_length_4935	High affinity cGMP-specific 3',5'-cyclic phosphodiesterase 9A	4935	20	0	69.8	1	F:GO:0003674	F:molecular_function			Coil (COILS); Coil (COILS); IPR023088 (PRINTS); IPR003607 (SMART); IPR002073 (PFAM); IPR036971 (G3DSA:1.10.1300.GENE3D); mobidb-lite (MOBIDB_LITE); mobidb-lite (MOBIDB_LITE); mobidb-lite (MOBIDB_LITE); mobidb-lite (MOBIDB_LITE); PTHR11347:SF78 (PANTHER); PTHR11347 (PANTHER); IPR023174 (PROSITE_PATTERNS); IPR002073 (PROSITE_PROFILES); IPR003607 (CDD); SSF109604 (SUPERFAMILY)	F:GO:0004114; P:GO:0007165; F:GO:0008081	F:3',5'-cyclic-nucleotide phosphodiesterase activity; P:signal transduction; F:phosphoric diester hydrolase activity
TRUE	[INTERPRO, BLASTED, MAPPED, GO-SLIM]	scaffold_000052F_transcript_id_17144seq_length_1706	delta(7)-sterol-C5(6)-desaturase-like isoform X1	1706	20	0	79.12	5	C:GO:0005737; C:GO:0005783; P:GO:0006629; P:GO:0009058; F:GO:0016491	C:cytoplasm; C:endoplasmic reticulum; P:lipid metabolic process; P:biosynthetic process; F:oxidoreductase activity	EC:1.14.19	Acting on paired donors, with incorporation or reduction of molecular oxygen. The oxygen incorporated need not be derived from O(2)	IPR006694 (PFAM); PTHR11863 (PANTHER); PTHR11863:SF33 (PANTHER); CYTOPLASMIC_DOMAIN (PHOBIUS); NON_CYTOPLASMIC_DOMAIN (PHOBIUS); CYTOPLASMIC_DOMAIN (PHOBIUS); NON_CYTOPLASMIC_DOMAIN (PHOBIUS); TRANSMEMBRANE (PHOBIUS); TRANSMEMBRANE (PHOBIUS); TRANSMEMBRANE (PHOBIUS); TMhelix (TMHMM); TMhelix (TMHMM); TMhelix (TMHMM)	F:GO:0005506; P:GO:0008610; F:GO:0016491; P:GO:0055114	F:iron ion binding; P:lipid biosynthetic process; F:oxidoreductase activity; P:oxidation-reduction process
TRUE	[INTERPRO, BLASTED]	scaffold_000752F_transcript_id_47seq_length_1892	maspardin-like	1892	20	0	83.25						IPR029058 (G3DSA:3.40.50.GENE3D); IPR026151 (PANTHER); IPR029058 (SUPERFAMILY)	no GO terms	no GO terms
TRUE	[INTERPRO, BLASTED, MAPPED, GO-SLIM]	scaffold_000158F_transcript_id_8450seq_length_1080	putative tRNA (cytidine(32)/guanosine(34)-2'-O)-methyltransferase	1080	20	0	71.99	2	P:GO:0006399; F:GO:0008168	P:tRNA metabolic process; F:methyltransferase activity			G3DSA:3.40.50.150 (GENE3D); IPR002877 (PFAM); IPR028590 (PTHR10920:PANTHER); PTHR10920 (PANTHER); NON_CYTOPLASMIC_DOMAIN (PHOBIUS); TRANSMEMBRANE (PHOBIUS); CYTOPLASMIC_DOMAIN (PHOBIUS); IPR015507 (HAMAP); cd02440 (CDD); IPR029063 (SUPERFAMILY); TMhelix (TMHMM)	P:GO:0001510; P:GO:0008033; F:GO:0008168; F:GO:0008175; P:GO:0032259	P:RNA methylation; P:tRNA processing; F:methyltransferase activity; F:tRNA methyltransferase activity; P:methylation
TRUE	[INTERPRO, BLASTED]	scaffold_000036F_transcript_id_17880seq_length_1479	orexin receptor type 1-like	1479	20	0	68.11						IPR000276 (PRINTS); IPR000611 (PRINTS); IPR000276 (PFAM); G3DSA:1.20.1070.10 (GENE3D); PTHR24241:SF76 (PANTHER); PTHR24241 (PANTHER); IPR000276 (PROSITE_PATTERNS); CYTOPLASMIC_DOMAIN (PHOBIUS); TRANSMEMBRANE (PHOBIUS); NON_CYTOPLASMIC_DOMAIN (PHOBIUS); TRANSMEMBRANE (PHOBIUS); TRANSMEMBRANE (PHOBIUS); NON_CYTOPLASMIC_DOMAIN (PHOBIUS); TRANSMEMBRANE (PHOBIUS); CYTOPLASMIC_DOMAIN (PHOBIUS); NON_CYT…	F:GO:0004930; F:GO:0004983; P:GO:0007186; C:GO:0016021	F:G-protein coupled receptor activity; F:neuropeptide Y receptor activity; P:G-protein coupled receptor signaling pathway; C:integral component of membrane
TRUE	[INTERPRO, BLASTED, MAPPED]	scaffold_000189F_transcript_id_4916seq_length_1779	UDP-glucuronosyltransferase 2B20-like	1779	20	0	63.93	7	P:GO:0008152; F:GO:0015020; C:GO:0016020; C:GO:0016021; F:GO:0016740; F:GO:0016757; F:GO:0016758	P:metabolic process; F:glucuronosyltransferase activity; C:membrane; C:integral component of membrane; F:transferase activity; F:transferase activity, transferring glycosyl groups; F:transferase activity, transferring hexosyl groups			G3DSA:3.40.50.2000 (GENE3D); IPR002213 (PFAM); G3DSA:3.40.50.2000 (GENE3D); PTHR11926 (PANTHER); PTHR11926:SF151 (PANTHER); IPR035595 (PROSITE_PATTERNS); SIGNAL_PEPTIDE_C_REGION (PHOBIUS); SIGNAL_PEPTIDE (PHOBIUS); CYTOPLASMIC_DOMAIN (PHOBIUS); SIGNAL_PEPTIDE_N_REGION (PHOBIUS); SIGNAL_PEPTIDE_H_REGION (PHOBIUS); TRANSMEMBRANE (PHOBIUS); NON_CYTOPLASMIC_DOMAIN (PHOBIUS); cd03784 (CDD); SSF53756 (…	P:GO:0008152; F:GO:0016758	P:metabolic process; F:transferase activity, transferring hexosyl groups
TRUE	[INTERPRO, BLASTED, MAPPED, GO-SLIM]	scaffold_000163F_transcript_id_7514seq_length_1872	basic helix-loop-helix neural transcription factor TAP	1872	20	0	85.34	1	F:GO:0003674	F:molecular_function			Coil (COILS); IPR011598 (SMART); IPR036638 (G3DSA:4.10.280.GENE3D); IPR011598 (PFAM); mobidb-lite (MOBIDB_LITE); PTHR19290 (PANTHER); PTHR19290:SF129 (PANTHER); IPR011598 (PROSITE_PROFILES); IPR011598 (CDD); IPR036638 (SUPERFAMILY)	F:GO:0046983	F:protein dimerization activity
TRUE	[INTERPRO, BLASTED, MAPPED]	scaffold_000087F_transcript_id_9984seq_length_1515	putative serine protease K12H4.7	1515	20	0	63.21	3	P:GO:0006508; F:GO:0008233; F:GO:0008236	P:proteolysis; F:peptidase activity; F:serine-type peptidase activity			IPR008758 (PFAM); IPR029058 (G3DSA:3.40.50.GENE3D); G3DSA:1.20.120.980 (GENE3D); PTHR11010:SF11 (PANTHER); PTHR11010 (PANTHER); SIGNAL_PEPTIDE (PHOBIUS); SIGNAL_PEPTIDE_C_REGION (PHOBIUS); SIGNAL_PEPTIDE_N_REGION (PHOBIUS); NON_CYTOPLASMIC_DOMAIN (PHOBIUS); SIGNAL_PEPTIDE_H_REGION (PHOBIUS); SignalP-noTM (SIGNALP_EUK); IPR029058 (SUPERFAMILY)	P:GO:0006508; F:GO:0008236	P:proteolysis; F:serine-type peptidase activity
TRUE	[INTERPRO, BLASTED, MAPPED]	scaffold_000097F_transcript_id_12127seq_length_2356-1	venom serine carboxypeptidase-like	2356	20	0	61.24	5	F:GO:0004180; F:GO:0004185; P:GO:0006508; F:GO:0008233; F:GO:0016787	F:carboxypeptidase activity; F:serine-type carboxypeptidase activity; P:proteolysis; F:peptidase activity; F:hydrolase activity			IPR001563 (PRINTS); IPR029058 (G3DSA:3.40.50.GENE3D); IPR001563 (PFAM); PTHR11802:SF98 (PANTHER); IPR001563 (PANTHER); SIGNAL_PEPTIDE (PHOBIUS); SIGNAL_PEPTIDE_N_REGION (PHOBIUS); SIGNAL_PEPTIDE_C_REGION (PHOBIUS); NON_CYTOPLASMIC_DOMAIN (PHOBIUS); SIGNAL_PEPTIDE_H_REGION (PHOBIUS); IPR029058 (SUPERFAMILY)	F:GO:0004185; P:GO:0006508	F:serine-type carboxypeptidase activity; P:proteolysis
TRUE	[INTERPRO, BLASTED]	scaffold_000131F_transcript_id_13094seq_length_1731	UDP-glucuronosyltransferase 2B7-like isoform X3	1731	20	0	81.68						G3DSA:3.40.50.2000 (GENE3D); IPR002213 (PFAM); PTHR11926 (PANTHER); PTHR11926:SF151 (PANTHER); IPR035595 (PROSITE_PATTERNS); TRANSMEMBRANE (PHOBIUS); NON_CYTOPLASMIC_DOMAIN (PHOBIUS); CYTOPLASMIC_DOMAIN (PHOBIUS); SSF53756 (SUPERFAMILY); TMhelix (TMHMM)	P:GO:0008152; F:GO:0016758	P:metabolic process; F:transferase activity, transferring hexosyl groups
TRUE	[INTERPRO, BLASTED, MAPPED]	scaffold_000021F_transcript_id_18341seq_length_888	putative hydroxypyruvate isomerase	888	20	0	66.9	2	F:GO:0008903; F:GO:0016853	F:hydroxypyruvate isomerase activity; F:isomerase activity			G3DSA:3.20.20.150 (GENE3D); IPR013022 (PFAM); IPR026040 (PIRSF); PTHR43489:SF6 (PANTHER); PTHR43489 (PANTHER); SIGNAL_PEPTIDE_C_REGION (PHOBIUS); SIGNAL_PEPTIDE_H_REGION (PHOBIUS); NON_CYTOPLASMIC_DOMAIN (PHOBIUS); SIGNAL_PEPTIDE (PHOBIUS); SIGNAL_PEPTIDE_N_REGION (PHOBIUS); PS51257 (PROSITE_PROFILES); SignalP-TM (SIGNALP_GRAM_POSITIVE); IPR036237 (SUPERFAMILY)	no GO terms	no GO terms
TRUE	[INTERPRO, BLASTED, MAPPED]	scaffold_000002F_transcript_id_24747seq_length_2299	regucalcin-like	2299	20	0	67.49	3	F:GO:0005509; F:GO:0030234; P:GO:0050790	F:calcium ion binding; F:enzyme regulator activity; P:regulation of catalytic activity			IPR008367 (PRINTS); IPR005511 (PRINTS); IPR013658 (PFAM); IPR011042 (G3DSA:2.120.10.GENE3D); PTHR10907:SF47 (PANTHER); IPR039096 (PANTHER); CYTOPLASMIC_DOMAIN (PHOBIUS); TRANSMEMBRANE (PHOBIUS); NON_CYTOPLASMIC_DOMAIN (PHOBIUS); SSF63829 (SUPERFAMILY)	F:GO:0005509; F:GO:0030234	F:calcium ion binding; F:enzyme regulator activity
TRUE	[INTERPRO, BLASTED, MAPPED]	scaffold_000056F_transcript_id_11553seq_length_2628	Transposon Ty3-I Gag-Pol polyprotein	2628	20	2.03013e-129	56.92	5	F:GO:0003676; F:GO:0004190; P:GO:0006508; F:GO:0008270; P:GO:0015074	F:nucleic acid binding; F:aspartic-type endopeptidase activity; P:proteolysis; F:zinc ion binding; P:DNA integration			IPR000477 (PFAM); IPR021109 (G3DSA:2.40.70.GENE3D); G3DSA:3.30.70.270 (GENE3D); G3DSA:3.10.10.10 (GENE3D); G3DSA:3.30.70.270 (GENE3D); mobidb-lite (MOBIDB_LITE); mobidb-lite (MOBIDB_LITE); mobidb-lite (MOBIDB_LITE); mobidb-lite (MOBIDB_LITE); mobidb-lite (MOBIDB_LITE); PTHR24559:SF222 (PANTHER); PTHR24559 (PANTHER); IPR000477 (PROSITE_PROFILES); cd00303 (CDD); cd01647 (CDD); SSF56672 (SUPERFAMILY)	no GO terms	no GO terms
TRUE	[INTERPRO, BLASTED, MAPPED]	scaffold_000047F_transcript_id_19389seq_length_2079	Dopamine N-acetyltransferase	2079	20	7.91929e-157	62.94	1	F:GO:0016740	F:transferase activity			G3DSA:3.40.630.30 (GENE3D); PTHR20905:SF25 (PANTHER); PTHR20905 (PANTHER); IPR016181 (SUPERFAMILY)	no GO terms	no GO terms
TRUE	[INTERPRO, BLASTED, MAPPED]	scaffold_000020F_transcript_id_22802seq_length_1871	thiamine transporter 2-like	1871	20	0	62.62	5	C:GO:0016020; C:GO:0016021; P:GO:0035461; P:GO:0051180; F:GO:0090482	C:membrane; C:integral component of membrane; P:vitamin transmembrane transport; P:vitamin transport; F:vitamin transmembrane transporter activity			IPR002666 (TIGRFAM); IPR002666 (PFAM); IPR002666 (PANTHER); PTHR10686:SF18 (PANTHER); CYTOPLASMIC_DOMAIN (PHOBIUS); TRANSMEMBRANE (PHOBIUS); NON_CYTOPLASMIC_DOMAIN (PHOBIUS); NON_CYTOPLASMIC_DOMAIN (PHOBIUS); TRANSMEMBRANE (PHOBIUS); CYTOPLASMIC_DOMAIN (PHOBIUS); CYTOPLASMIC_DOMAIN (PHOBIUS); TRANSMEMBRANE (PHOBIUS); TRANSMEMBRANE (PHOBIUS); NON_CYTOPLASMIC_DOMAIN (PHOBIUS); CYTOPLASMIC_DOMAIN (P…	C:GO:0016021; P:GO:0051180; F:GO:0090482	C:integral component of membrane; P:vitamin transport; F:vitamin transmembrane transporter activity
TRUE	[INTERPRO, BLASTED]	scaffold_000035F_transcript_id_20875seq_length_2754	prostatic acid phosphatase-like isoform X1	2754	20	0	69.35						IPR029033 (G3DSA:3.40.50.GENE3D); IPR000560 (PFAM); PTHR11567:SF170 (PANTHER); PTHR11567 (PANTHER); IPR033379 (PROSITE_PATTERNS); TRANSMEMBRANE (PHOBIUS); CYTOPLASMIC_DOMAIN (PHOBIUS); NON_CYTOPLASMIC_DOMAIN (PHOBIUS); PS51257 (PROSITE_PROFILES); IPR000560 (CDD); IPR029033 (SUPERFAMILY); TMhelix (TMHMM)	no GO terms	no GO terms
TRUE	[INTERPRO, BLASTED]	scaffold_000006F_transcript_id_25484seq_length_2344	PREDICTED: LOW QUALITY PROTEIN: uncharacterized protein KIAA1841	2344	20	0	63.25						IPR021777 (PFAM); mobidb-lite (MOBIDB_LITE); PTHR20946 (PANTHER)	no GO terms	no GO terms
TRUE	[INTERPRO, BLASTED, MAPPED]	scaffold_000194F_transcript_id_6377seq_length_3130	facilitated trehalose transporter Tret1-like	3130	20	0	62.55	6	F:GO:0005215; P:GO:0008643; C:GO:0016020; C:GO:0016021; F:GO:0022857; P:GO:0055085	F:transporter activity; P:carbohydrate transport; C:membrane; C:integral component of membrane; F:transmembrane transporter activity; P:transmembrane transport			IPR005828 (PFAM); G3DSA:1.20.1250.20 (GENE3D); PTHR23500 (PANTHER); PTHR23500:SF37 (PANTHER); IPR005829 (PROSITE_PATTERNS); CYTOPLASMIC_DOMAIN (PHOBIUS); NON_CYTOPLASMIC_DOMAIN (PHOBIUS); CYTOPLASMIC_DOMAIN (PHOBIUS); TRANSMEMBRANE (PHOBIUS); TRANSMEMBRANE (PHOBIUS); TRANSMEMBRANE (PHOBIUS); TRANSMEMBRANE (PHOBIUS); NON_CYTOPLASMIC_DOMAIN (PHOBIUS); TRANSMEMBRANE (PHOBIUS); TRANSMEMBRANE (PHOBIUS…	F:GO:0005215; C:GO:0016021; F:GO:0022857; P:GO:0055085	F:transporter activity; C:integral component of membrane; F:transmembrane transporter activity; P:transmembrane transport
TRUE	[INTERPRO, BLASTED, MAPPED]	scaffold_000158F_transcript_id_8810seq_length_1053	zinc transporter ZIP3	1053	20	0	54.87	6	C:GO:0016020; C:GO:0016021; C:GO:0016323; P:GO:0030001; F:GO:0046873; P:GO:0055085	C:membrane; C:integral component of membrane; C:basolateral plasma membrane; P:metal ion transport; F:metal ion transmembrane transporter activity; P:transmembrane transport			IPR003689 (PFAM); mobidb-lite (MOBIDB_LITE); PTHR11040:SF80 (PANTHER); PTHR11040 (PANTHER); TRANSMEMBRANE (PHOBIUS); TRANSMEMBRANE (PHOBIUS); CYTOPLASMIC_DOMAIN (PHOBIUS); TRANSMEMBRANE (PHOBIUS); NON_CYTOPLASMIC_DOMAIN (PHOBIUS); NON_CYTOPLASMIC_DOMAIN (PHOBIUS); TRANSMEMBRANE (PHOBIUS); TRANSMEMBRANE (PHOBIUS); NON_CYTOPLASMIC_DOMAIN (PHOBIUS); CYTOPLASMIC_DOMAIN (PHOBIUS); NON_CYTOPLASMIC_DOMA…	C:GO:0016020; P:GO:0030001; F:GO:0046873; P:GO:0055085	C:membrane; P:metal ion transport; F:metal ion transmembrane transporter activity; P:transmembrane transport
TRUE	[INTERPRO, BLASTED, MAPPED]	scaffold_000182F_transcript_id_3502seq_length_2313	lysocardiolipin acyltransferase 1-like	2313	20	0	69.83	4	P:GO:0008152; C:GO:0016020; C:GO:0016021; F:GO:0016746	P:metabolic process; C:membrane; C:integral component of membrane; F:transferase activity, transferring acyl groups			IPR002123 (SMART); IPR032098 (PFAM); IPR002123 (PFAM); PTHR10983 (PANTHER); PTHR10983:SF16 (PANTHER); CYTOPLASMIC_DOMAIN (PHOBIUS); TRANSMEMBRANE (PHOBIUS); NON_CYTOPLASMIC_DOMAIN (PHOBIUS); TRANSMEMBRANE (PHOBIUS); CYTOPLASMIC_DOMAIN (PHOBIUS); TRANSMEMBRANE (PHOBIUS); NON_CYTOPLASMIC_DOMAIN (PHOBIUS); cd07990 (CDD); SSF69593 (SUPERFAMILY); TMhelix (TMHMM); TMhelix (TMHMM); TMhelix (TMHMM)	P:GO:0008152; F:GO:0016746	P:metabolic process; F:transferase activity, transferring acyl groups
TRUE	[INTERPRO, BLASTED, MAPPED, GO-SLIM]	scaffold_000125F_transcript_id_12380seq_length_3786	glucose dehydrogenase [FAD, quinone]-like	3786	20	0	74.61	2	F:GO:0016491; F:GO:0043167	F:oxidoreductase activity; F:ion binding			IPR007867 (PFAM); G3DSA:3.30.560.10 (GENE3D); IPR000172 (PFAM); IPR012132 (PIRSF); IPR036188 (G3DSA:3.50.50.GENE3D); PTHR11552:SF187 (PANTHER); PTHR11552 (PANTHER); IPR000172 (PROSITE_PATTERNS); SIGNAL_PEPTIDE_C_REGION (PHOBIUS); NON_CYTOPLASMIC_DOMAIN (PHOBIUS); SIGNAL_PEPTIDE_H_REGION (PHOBIUS); SIGNAL_PEPTIDE (PHOBIUS); SIGNAL_PEPTIDE_N_REGION (PHOBIUS); SignalP-noTM (SIGNALP_GRAM_NEGATIVE); S…	F:GO:0016614; F:GO:0050660; P:GO:0055114	F:oxidoreductase activity, acting on CH-OH group of donors; F:flavin adenine dinucleotide binding; P:oxidation-reduction process
TRUE	[INTERPRO, BLASTED, MAPPED]	scaffold_000265F_transcript_id_14175seq_length_5722	E3 ubiquitin-protein ligase listerin	5722	20	0	56.57	3	F:GO:0008270; F:GO:0016874; F:GO:0046872	F:zinc ion binding; F:ligase activity; F:metal ion binding			IPR011016 (SMART); IPR013083 (G3DSA:3.30.40.GENE3D); mobidb-lite (MOBIDB_LITE); mobidb-lite (MOBIDB_LITE); PTHR12389 (PANTHER); CYTOPLASMIC_DOMAIN (PHOBIUS); TRANSMEMBRANE (PHOBIUS); TRANSMEMBRANE (PHOBIUS); CYTOPLASMIC_DOMAIN (PHOBIUS); NON_CYTOPLASMIC_DOMAIN (PHOBIUS); IPR001841 (PROSITE_PROFILES); cd16491 (CDD); IPR016024 (SUPERFAMILY); SSF57850 (SUPERFAMILY)	F:GO:0005488; F:GO:0008270	F:binding; F:zinc ion binding
TRUE	[INTERPRO, BLASTED, MAPPED, GO-SLIM]	scaffold_000055F_transcript_id_12714seq_length_2141	D-2-hydroxyglutarate dehydrogenase, mitochondrial-like	2141	20	0	78.33	1	F:GO:0043167	F:ion binding			G3DSA:3.30.70.2190 (GENE3D); IPR004113 (PFAM); IPR006094 (PFAM); G3DSA:3.30.465.10 (GENE3D); IPR016171 (G3DSA:1.10.45.GENE3D); G3DSA:3.30.70.2740 (GENE3D); PTHR43716:SF1 (PANTHER); PTHR43716 (PANTHER); IPR016166 (PROSITE_PROFILES); IPR036318 (SUPERFAMILY); IPR016164 (SUPERFAMILY)	F:GO:0003824; F:GO:0016491; F:GO:0050660; P:GO:0055114; F:GO:0071949	F:catalytic activity; F:oxidoreductase activity; F:flavin adenine dinucleotide binding; P:oxidation-reduction process; F:FAD binding
TRUE	[INTERPRO, BLASTED, MAPPED]	scaffold_000004F_transcript_id_24016seq_length_1920	alpha-tocopherol transfer protein-like	1920	20	0	58.59	1	F:GO:0016787	F:hydrolase activity			IPR001251 (PFAM); IPR036865 (G3DSA:3.40.525.GENE3D); PTHR10174:SF170 (PANTHER); PTHR10174 (PANTHER); IPR001251 (PROSITE_PROFILES); IPR001251 (CDD); IPR036865 (SUPERFAMILY); IPR036273 (SUPERFAMILY)	no GO terms	no GO terms
TRUE	[INTERPRO, BLASTED, MAPPED, GO-SLIM]	scaffold_000050F_transcript_id_19045seq_length_1447	putative cysteine proteinase CG12163	1447	20	0	67.98	1	F:GO:0003674	F:molecular_function			Coil (COILS); IPR000668 (PRINTS); IPR013201 (SMART); IPR000668 (SMART); IPR000668 (PFAM); IPR013201 (PFAM); G3DSA:3.90.70.10 (GENE3D); PTHR12411:SF444 (PANTHER); IPR013128 (PANTHER); IPR025661 (PROSITE_PATTERNS); IPR025660 (PROSITE_PATTERNS); SIGNAL_PEPTIDE (PHOBIUS); NON_CYTOPLASMIC_DOMAIN (PHOBIUS); SIGNAL_PEPTIDE_H_REGION (PHOBIUS); SIGNAL_PEPTIDE_N_REGION (PHOBIUS); SIGNAL_PEPTIDE_C_REGION (P…	P:GO:0006508; F:GO:0008234	P:proteolysis; F:cysteine-type peptidase activity
TRUE	[INTERPRO, BLASTED, MAPPED, GO-SLIM]	scaffold_000133F_transcript_id_15433seq_length_1270	probable phosphoserine aminotransferase	1270	20	0	78.28	5	F:GO:0003674; C:GO:0005737; P:GO:0006520; P:GO:0009058; P:GO:0034641	F:molecular_function; C:cytoplasm; P:cellular amino acid metabolic process; P:biosynthetic process; P:cellular nitrogen compound metabolic process	EC:2.6.1.52	Phosphoserine transaminase	IPR000192 (PFAM); IPR022278 (TIGRFAM); IPR015421 (G3DSA:3.40.640.GENE3D); IPR022278 (PIRSF); IPR015422 (G3DSA:3.90.1150.GENE3D); PTHR43247 (PANTHER); IPR022278 (HAMAP); IPR015424 (SUPERFAMILY)	F:GO:0003824; F:GO:0004648; P:GO:0006564	F:catalytic activity; F:O-phospho-L-serine:2-oxoglutarate aminotransferase activity; P:L-serine biosynthetic process
TRUE	[INTERPRO, BLASTED, MAPPED, GO-SLIM]	scaffold_000022F_transcript_id_20725seq_length_1567	omega-amidase NIT2	1567	20	0	81.07	5	C:GO:0005815; C:GO:0005829; P:GO:0006520; F:GO:0016810; P:GO:0034641	C:microtubule organizing center; C:cytosol; P:cellular amino acid metabolic process; F:hydrolase activity, acting on carbon-nitrogen (but not peptide) bonds; P:cellular nitrogen compound metabolic process	EC:3.5.1.3	Omega-amidase	IPR003010 (PFAM); IPR036526 (G3DSA:3.60.110.GENE3D); PTHR23088:SF30 (PANTHER); PTHR23088 (PANTHER); IPR003010 (PROSITE_PROFILES); cd07572 (CDD); IPR036526 (SUPERFAMILY)	P:GO:0006807	P:nitrogen compound metabolic process
TRUE	[INTERPRO, BLASTED, MAPPED, GO-SLIM]	scaffold_000000F_transcript_id_26531seq_length_1042	3-oxoacyl-[acyl-carrier-protein] reductase FabG-like	1042	20	3.80214e-92	83.61	2	C:GO:0005575; F:GO:0016491	C:cellular_component; F:oxidoreductase activity			IPR002347 (PRINTS); IPR002347 (PRINTS); IPR002347 (PFAM); G3DSA:3.40.50.720 (GENE3D); PTHR43975 (PANTHER); PTHR43975:SF2 (PANTHER); NON_CYTOPLASMIC_DOMAIN (PHOBIUS); SIGNAL_PEPTIDE_C_REGION (PHOBIUS); SIGNAL_PEPTIDE_N_REGION (PHOBIUS); SIGNAL_PEPTIDE (PHOBIUS); SIGNAL_PEPTIDE_H_REGION (PHOBIUS); SignalP-TM (SIGNALP_GRAM_POSITIVE); IPR036291 (SUPERFAMILY)	no GO terms	no GO terms
TRUE	[INTERPRO, BLASTED, MAPPED, GO-SLIM]	scaffold_000025F_transcript_id_19985seq_length_1509	cathepsin B-like	1509	20	0	66.29	1	F:GO:0008233	F:peptidase activity			IPR000668 (PRINTS); IPR000668 (SMART); IPR000668 (PFAM); G3DSA:3.90.70.10 (GENE3D); IPR012599 (PFAM); PTHR12411:SF540 (PANTHER); IPR013128 (PANTHER); IPR025660 (PROSITE_PATTERNS); IPR000169 (PROSITE_PATTERNS); SIGNAL_PEPTIDE_C_REGION (PHOBIUS); SIGNAL_PEPTIDE_H_REGION (PHOBIUS); SIGNAL_PEPTIDE_N_REGION (PHOBIUS); NON_CYTOPLASMIC_DOMAIN (PHOBIUS); SIGNAL_PEPTIDE (PHOBIUS); cd02620 (CDD); SignalP-n…	F:GO:0004197; P:GO:0006508; F:GO:0008234; P:GO:0050790	F:cysteine-type endopeptidase activity; P:proteolysis; F:cysteine-type peptidase activity; P:regulation of catalytic activity
TRUE	[INTERPRO, BLASTED, MAPPED, GO-SLIM]	scaffold_000035F_transcript_id_20201seq_length_1042	cytidine deaminase-like	1042	20	6.05338e-99	71.58	1	F:GO:0043167	F:ion binding			G3DSA:3.40.140.10 (GENE3D); IPR006262 (TIGRFAM); IPR002125 (PFAM); PTHR11644 (PANTHER); IPR016192 (PROSITE_PATTERNS); SIGNAL_PEPTIDE (PHOBIUS); NON_CYTOPLASMIC_DOMAIN (PHOBIUS); SIGNAL_PEPTIDE_N_REGION (PHOBIUS); SIGNAL_PEPTIDE_H_REGION (PHOBIUS); SIGNAL_PEPTIDE_C_REGION (PHOBIUS); IPR002125 (PROSITE_PROFILES); PS51257 (PROSITE_PROFILES); cd01283 (CDD); SignalP-noTM (SIGNALP_EUK); IPR016193 (SUPE…	F:GO:0003824; F:GO:0004126; F:GO:0008270; P:GO:0009972; F:GO:0016787	F:catalytic activity; F:cytidine deaminase activity; F:zinc ion binding; P:cytidine deamination; F:hydrolase activity
TRUE	[INTERPRO, BLASTED, MAPPED]	scaffold_000166F_transcript_id_2079seq_length_2654	rho GTPase-activating protein 18	2654	20	0	69.4	1	P:GO:0007165	P:signal transduction			IPR000198 (SMART); IPR008936 (G3DSA:1.10.555.GENE3D); IPR000198 (PFAM); mobidb-lite (MOBIDB_LITE); mobidb-lite (MOBIDB_LITE); mobidb-lite (MOBIDB_LITE); PTHR14963 (PANTHER); PTHR14963:SF1 (PANTHER); IPR000198 (PROSITE_PROFILES); IPR008936 (SUPERFAMILY)	P:GO:0007165	P:signal transduction
TRUE	[INTERPRO, BLASTED, MAPPED, GO-SLIM]	scaffold_000234F_transcript_id_1249seq_length_548	DNA-directed RNA polymerases I, II, and III subunit RPABC2	548	20	1.08579e-63	90.82	8	F:GO:0003677; C:GO:0005654; C:GO:0005730; P:GO:0009058; F:GO:0016779; C:GO:0032991; P:GO:0034641; P:GO:0044281	F:DNA binding; C:nucleoplasm; C:nucleolus; P:biosynthetic process; F:nucleotidyltransferase activity; C:protein-containing complex; P:cellular nitrogen compound metabolic process; P:small molecule metabolic process	EC:2.7.7.6	DNA-directed RNA polymerase	Coil (COILS); IPR006110 (SMART); IPR012293 (G3DSA:3.90.940.GENE3D); IPR028363 (PIRSF); IPR006110 (PFAM); IPR006111 (PIRSF); mobidb-lite (MOBIDB_LITE); IPR020708 (PROSITE_PATTERNS); IPR036161 (SUPERFAMILY)	F:GO:0003677; F:GO:0003899; C:GO:0005634; C:GO:0005665; P:GO:0006351	F:DNA binding; F:DNA-directed 5'-3' RNA polymerase activity; C:nucleus; C:RNA polymerase II, core complex; P:transcription, DNA-templated
TRUE	[INTERPRO, BLASTED, MAPPED]	scaffold_000007F_transcript_id_25430seq_length_2343	quinone oxidoreductase-like protein 2	2343	20	0	66.85	3	F:GO:0003960; F:GO:0016491; P:GO:0055114	F:NADPH:quinone reductase activity; F:oxidoreductase activity; P:oxidation-reduction process			IPR020843 (SMART); G3DSA:3.40.50.720 (GENE3D); G3DSA:3.90.180.10 (GENE3D); IPR013149 (PFAM); IPR013154 (PFAM); PTHR43677:SF4 (PANTHER); PTHR43677 (PANTHER); cd08241 (CDD); IPR011032 (SUPERFAMILY); IPR036291 (SUPERFAMILY)	F:GO:0016491; P:GO:0055114	F:oxidoreductase activity; P:oxidation-reduction process
TRUE	[INTERPRO, BLASTED, MAPPED, GO-SLIM]	scaffold_000026F_transcript_id_19331seq_length_2149	probable serine incorporator isoform X3	2149	20	0	76.44	1	C:GO:0005575	C:cellular_component			IPR005016 (PFAM); IPR005016 (PANTHER); CYTOPLASMIC_DOMAIN (PHOBIUS); NON_CYTOPLASMIC_DOMAIN (PHOBIUS); TRANSMEMBRANE (PHOBIUS); SIGNAL_PEPTIDE_N_REGION (PHOBIUS); SIGNAL_PEPTIDE_C_REGION (PHOBIUS); TRANSMEMBRANE (PHOBIUS); TRANSMEMBRANE (PHOBIUS); TRANSMEMBRANE (PHOBIUS); NON_CYTOPLASMIC_DOMAIN (PHOBIUS); TRANSMEMBRANE (PHOBIUS); CYTOPLASMIC_DOMAIN (PHOBIUS); SIGNAL_PEPTIDE (PHOBIUS); TRANSMEMBRA…	C:GO:0016020	C:membrane
TRUE	[INTERPRO, BLASTED, MAPPED, GO-SLIM]	scaffold_000067F_transcript_id_13392seq_length_3644	ribosomal protein S6 kinase alpha-5 isoform X1	3644	20	0	84.64	6	C:GO:0005622; P:GO:0006464; P:GO:0006520; P:GO:0007165; F:GO:0016301; F:GO:0043167	C:intracellular; P:cellular protein modification process; P:cellular amino acid metabolic process; P:signal transduction; F:kinase activity; F:ion binding	EC:2.7.11	Transferring phosphorus-containing groups	Coil (COILS); IPR000719 (SMART); IPR000961 (SMART); IPR000719 (PFAM); IPR017892 (PFAM); G3DSA:1.10.510.10 (GENE3D); G3DSA:1.10.510.10 (GENE3D); G3DSA:3.30.200.20 (GENE3D); G3DSA:3.30.200.20 (GENE3D); mobidb-lite (MOBIDB_LITE); mobidb-lite (MOBIDB_LITE); mobidb-lite (MOBIDB_LITE); PTHR24351:SF41 (PANTHER); PTHR24351 (PANTHER); IPR017441 (PROSITE_PATTERNS); IPR008271 (PROSITE_PATTERNS); IPR008271 (…	F:GO:0004672; F:GO:0004674; F:GO:0005524; P:GO:0006468	F:protein kinase activity; F:protein serine/threonine kinase activity; F:ATP binding; P:protein phosphorylation
TRUE	[INTERPRO, BLASTED]	scaffold_000114F_transcript_id_14086seq_length_1706	facilitated trehalose transporter Tret1-like	1706	20	0	65.6						G3DSA:1.20.1250.20 (GENE3D); IPR005828 (PFAM); PTHR23500 (PANTHER); PTHR23500 (PANTHER); PTHR23500:SF3 (PANTHER); PTHR23500:SF3 (PANTHER); CYTOPLASMIC_DOMAIN (PHOBIUS); CYTOPLASMIC_DOMAIN (PHOBIUS); NON_CYTOPLASMIC_DOMAIN (PHOBIUS); TRANSMEMBRANE (PHOBIUS); TRANSMEMBRANE (PHOBIUS); NON_CYTOPLASMIC_DOMAIN (PHOBIUS); TRANSMEMBRANE (PHOBIUS); CYTOPLASMIC_DOMAIN (PHOBIUS); TRANSMEMBRANE (PHOBIUS); IP…	C:GO:0016021; F:GO:0022857; P:GO:0055085	C:integral component of membrane; F:transmembrane transporter activity; P:transmembrane transport
TRUE	[INTERPRO, BLASTED, MAPPED]	scaffold_000209F_transcript_id_10121seq_length_2362	glucose dehydrogenase [FAD, quinone]-like	2362	20	0	71.49	6	C:GO:0016020; C:GO:0016021; F:GO:0016614; P:GO:0034976; F:GO:0050660; P:GO:0055114	C:membrane; C:integral component of membrane; F:oxidoreductase activity, acting on CH-OH group of donors; P:response to endoplasmic reticulum stress; F:flavin adenine dinucleotide binding; P:oxidation-reduction process			IPR036188 (G3DSA:3.50.50.GENE3D); G3DSA:3.30.560.10 (GENE3D); IPR000172 (PFAM); IPR012132 (PIRSF); IPR007867 (PFAM); PTHR11552:SF148 (PANTHER); PTHR11552 (PANTHER); IPR000172 (PROSITE_PATTERNS); IPR000172 (PROSITE_PATTERNS); TRANSMEMBRANE (PHOBIUS); TRANSMEMBRANE (PHOBIUS); NON_CYTOPLASMIC_DOMAIN (PHOBIUS); NON_CYTOPLASMIC_DOMAIN (PHOBIUS); CYTOPLASMIC_DOMAIN (PHOBIUS); SSF54373 (SUPERFAMILY); IP…	F:GO:0016614; F:GO:0050660; P:GO:0055114	F:oxidoreductase activity, acting on CH-OH group of donors; F:flavin adenine dinucleotide binding; P:oxidation-reduction process
TRUE	[INTERPRO, BLASTED, MAPPED]	scaffold_000167F_transcript_id_17040seq_length_2235	transmembrane serine protease 9, putative	2235	20	0	57.54	6	F:GO:0004252; P:GO:0006508; F:GO:0008233; F:GO:0008236; C:GO:0016021; F:GO:0016787	F:serine-type endopeptidase activity; P:proteolysis; F:peptidase activity; F:serine-type peptidase activity; C:integral component of membrane; F:hydrolase activity			IPR001314 (PRINTS); IPR001254 (SMART); G3DSA:2.40.10.10 (GENE3D); IPR001254 (PFAM); PTHR24253 (PANTHER); IPR033116 (PROSITE_PATTERNS); IPR018114 (PROSITE_PATTERNS); SIGNAL_PEPTIDE (PHOBIUS); NON_CYTOPLASMIC_DOMAIN (PHOBIUS); SIGNAL_PEPTIDE_H_REGION (PHOBIUS); SIGNAL_PEPTIDE_N_REGION (PHOBIUS); SIGNAL_PEPTIDE_C_REGION (PHOBIUS); IPR001254 (PROSITE_PROFILES); IPR001254 (CDD); SignalP-noTM (SIGNALP_…	F:GO:0004252; P:GO:0006508	F:serine-type endopeptidase activity; P:proteolysis
TRUE	[INTERPRO, BLASTED]	scaffold_000115F_transcript_id_761seq_length_2580	UDP-glucuronosyltransferase 2B18-like	2580	20	0	77.09						G3DSA:3.40.50.2000 (GENE3D); G3DSA:3.40.50.2000 (GENE3D); IPR002213 (PFAM); PTHR11926 (PANTHER); PTHR11926:SF151 (PANTHER); IPR035595 (PROSITE_PATTERNS); TRANSMEMBRANE (PHOBIUS); CYTOPLASMIC_DOMAIN (PHOBIUS); TRANSMEMBRANE (PHOBIUS); NON_CYTOPLASMIC_DOMAIN (PHOBIUS); CYTOPLASMIC_DOMAIN (PHOBIUS); SSF53756 (SUPERFAMILY); TMhelix (TMHMM); TMhelix (TMHMM)	P:GO:0008152; F:GO:0016758	P:metabolic process; F:transferase activity, transferring hexosyl groups
TRUE	[INTERPRO, BLASTED]	scaffold_000459F_transcript_id_428seq_length_2249	UDP-glucuronosyltransferase 2B18-like	2249	20	0	74.33						G3DSA:3.40.50.2000 (GENE3D); IPR002213 (PFAM); G3DSA:3.40.50.2000 (GENE3D); PTHR11926:SF151 (PANTHER); PTHR11926 (PANTHER); IPR035595 (PROSITE_PATTERNS); NON_CYTOPLASMIC_DOMAIN (PHOBIUS); SIGNAL_PEPTIDE_N_REGION (PHOBIUS); CYTOPLASMIC_DOMAIN (PHOBIUS); TRANSMEMBRANE (PHOBIUS); SIGNAL_PEPTIDE_C_REGION (PHOBIUS); SIGNAL_PEPTIDE_H_REGION (PHOBIUS); SIGNAL_PEPTIDE (PHOBIUS); PS51257 (PROSITE_PROFILES…	P:GO:0008152; F:GO:0016758	P:metabolic process; F:transferase activity, transferring hexosyl groups
TRUE	[INTERPRO, BLASTED, MAPPED, GO-SLIM]	scaffold_000192F_transcript_id_12834seq_length_567	mpv17-like protein isoform X1	567	20	1.98269e-127	81.41	1	C:GO:0005737	C:cytoplasm			IPR007248 (PFAM); PTHR11266:SF53 (PANTHER); IPR007248 (PANTHER); NON_CYTOPLASMIC_DOMAIN (PHOBIUS); TRANSMEMBRANE (PHOBIUS); TRANSMEMBRANE (PHOBIUS); CYTOPLASMIC_DOMAIN (PHOBIUS); TRANSMEMBRANE (PHOBIUS); NON_CYTOPLASMIC_DOMAIN (PHOBIUS); TRANSMEMBRANE (PHOBIUS); CYTOPLASMIC_DOMAIN (PHOBIUS); CYTOPLASMIC_DOMAIN (PHOBIUS)	C:GO:0016021	C:integral component of membrane
TRUE	[INTERPRO, BLASTED]	scaffold_000114F_transcript_id_14106seq_length_1442	facilitated trehalose transporter Tret1-like	1442	20	1.95178e-148	72.07						IPR005828 (PFAM); G3DSA:1.20.1250.20 (GENE3D); PTHR23500 (PANTHER); PTHR23500:SF3 (PANTHER); NON_CYTOPLASMIC_DOMAIN (PHOBIUS); NON_CYTOPLASMIC_DOMAIN (PHOBIUS); CYTOPLASMIC_DOMAIN (PHOBIUS); CYTOPLASMIC_DOMAIN (PHOBIUS); NON_CYTOPLASMIC_DOMAIN (PHOBIUS); TRANSMEMBRANE (PHOBIUS); TRANSMEMBRANE (PHOBIUS); CYTOPLASMIC_DOMAIN (PHOBIUS); TRANSMEMBRANE (PHOBIUS); TRANSMEMBRANE (PHOBIUS); TRANSMEMBRANE …	C:GO:0016021; F:GO:0022857; P:GO:0055085	C:integral component of membrane; F:transmembrane transporter activity; P:transmembrane transport
TRUE	[INTERPRO, BLASTED, MAPPED, GO-SLIM]	scaffold_000043F_transcript_id_17086seq_length_1714	glutathione S-transferase 1-like	1714	20	2.31972e-178	80.6	1	F:GO:0003674	F:molecular_function			IPR004046 (PFAM); IPR004045 (PFAM); G3DSA:1.20.1050.10 (GENE3D); G3DSA:3.40.30.10 (GENE3D),SFLDS00019 (SFLD),SFLDG00358 (SFLD),SFLDG01153 (SFLD); PTHR43969 (PANTHER); IPR004045 (PROSITE_PROFILES); IPR010987 (PROSITE_PROFILES); cd03177 (CDD); cd03045 (CDD); IPR036282 (SUPERFAMILY); IPR036249 (SUPERFAMILY)	F:GO:0005515	F:protein binding
TRUE	[INTERPRO, BLASTED, MAPPED, GO-SLIM]	scaffold_000433F_transcript_id_2982seq_length_2548	acetyl-CoA acetyltransferase, cytosolic	2548	20	0	81.2	2	P:GO:0008150; F:GO:0016746	P:biological_process; F:transferase activity, transferring acyl groups			IPR016039 (G3DSA:3.40.47.GENE3D); IPR002155 (TIGRFAM); IPR020617 (PFAM); IPR020616 (PFAM); IPR016039 (G3DSA:3.40.47.GENE3D); IPR002155 (PIRSF); mobidb-lite (MOBIDB_LITE); PTHR18919 (PANTHER); PTHR18919:SF101 (PANTHER); IPR020613 (PROSITE_PATTERNS); IPR020610 (PROSITE_PATTERNS); IPR020615 (PROSITE_PATTERNS); IPR002155 (CDD); IPR016039 (SUPERFAMILY); IPR016039 (SUPERFAMILY)	F:GO:0003824; P:GO:0008152; F:GO:0016747	F:catalytic activity; P:metabolic process; F:transferase activity, transferring acyl groups other than amino-acyl groups
TRUE	[INTERPRO, BLASTED, MAPPED]	scaffold_000261F_transcript_id_4812seq_length_2772	putative RNA-directed DNA polymerase from transposon X-element	2772	20	0	60.47	2	F:GO:0003964; P:GO:0006278	F:RNA-directed DNA polymerase activity; P:RNA-dependent DNA biosynthetic process			IPR005135 (PFAM); IPR000477 (PFAM); IPR036691 (G3DSA:3.60.10.GENE3D); PTHR45030 (PANTHER); IPR000477 (PROSITE_PROFILES); cd01650 (CDD); SSF56672 (SUPERFAMILY); IPR036691 (SUPERFAMILY)	no GO terms	no GO terms
TRUE	[INTERPRO, BLASTED, MAPPED]	scaffold_000087F_transcript_id_10131seq_length_594	putative serine protease K12H4.7	594	20	2.87213e-57	67.84	3	P:GO:0006508; F:GO:0008233; F:GO:0008236	P:proteolysis; F:peptidase activity; F:serine-type peptidase activity			Coil (COILS); IPR029058 (G3DSA:3.40.50.GENE3D); IPR008758 (PFAM); PTHR11010 (PANTHER); PTHR11010:SF11 (PANTHER); NON_CYTOPLASMIC_DOMAIN (PHOBIUS); TRANSMEMBRANE (PHOBIUS); CYTOPLASMIC_DOMAIN (PHOBIUS); IPR029058 (SUPERFAMILY); TMhelix (TMHMM)	P:GO:0006508; F:GO:0008236	P:proteolysis; F:serine-type peptidase activity
TRUE	[INTERPRO, BLASTED, MAPPED, GO-SLIM]	scaffold_000572F_transcript_id_8059seq_length_1089	protein fork head	1089	20	0	65.59	1	F:GO:0003674	F:molecular_function			IPR001766 (PRINTS); IPR001766 (SMART); IPR013638 (PFAM); IPR001766 (PFAM); IPR036388 (G3DSA:1.10.10.GENE3D); IPR018533 (PFAM); mobidb-lite (MOBIDB_LITE); mobidb-lite (MOBIDB_LITE); PTHR11829 (PANTHER); PTHR11829:SF230 (PANTHER); IPR018122 (PROSITE_PATTERNS); IPR030456 (PROSITE_PATTERNS); IPR001766 (PROSITE_PROFILES); IPR001766 (CDD); IPR036390 (SUPERFAMILY)	F:GO:0003700; P:GO:0006355; F:GO:0008134; F:GO:0019904; F:GO:0043565	F:DNA-binding transcription factor activity; P:regulation of transcription, DNA-templated; F:transcription factor binding; F:protein domain specific binding; F:sequence-specific DNA binding
TRUE	[INTERPRO, BLASTED, MAPPED, GO-SLIM]	scaffold_000027F_transcript_id_21818seq_length_1376	protein canopy 4	1376	20	2.30274e-131	83.34	2	F:GO:0003674; P:GO:0006457	F:molecular_function; P:protein folding			IPR021852 (PFAM); mobidb-lite (MOBIDB_LITE); PTHR15382 (PANTHER); PTHR15382:SF3 (PANTHER); TRANSMEMBRANE (PHOBIUS); CYTOPLASMIC_DOMAIN (PHOBIUS); NON_CYTOPLASMIC_DOMAIN (PHOBIUS); TMhelix (TMHMM)	no GO terms	no GO terms
TRUE	[INTERPRO, BLASTED, MAPPED, GO-SLIM]	scaffold_000000F_transcript_id_26637seq_length_2370	N(4)-(Beta-N-acetylglucosaminyl)-L-asparaginase	2370	20	0	74.82	5	C:GO:0005764; P:GO:0006464; P:GO:0006520; F:GO:0016810; P:GO:0034641	C:lysosome; P:cellular protein modification process; P:cellular amino acid metabolic process; F:hydrolase activity, acting on carbon-nitrogen (but not peptide) bonds; P:cellular nitrogen compound metabolic process	EC:3.5.1.26	N(4)-(beta-N-acetylglucosaminyl)-L-asparaginase	IPR000246 (PFAM); G3DSA:3.60.20.30 (GENE3D); IPR000246 (PANTHER); PTHR10188:SF6 (PANTHER); NON_CYTOPLASMIC_DOMAIN (PHOBIUS); TRANSMEMBRANE (PHOBIUS); CYTOPLASMIC_DOMAIN (PHOBIUS); cd04513 (CDD); IPR029055 (SUPERFAMILY); TMhelix (TMHMM)	F:GO:0016787	F:hydrolase activity
TRUE	[INTERPRO, BLASTED, MAPPED, GO-SLIM]	scaffold_000316F_transcript_id_3803seq_length_5058	probable cation-transporting ATPase 13A3 isoform X1	5058	20	0	70.92	1	F:GO:0003674	F:molecular_function			PR00121 (PRINTS); PR00119 (PRINTS); IPR006544 (TIGRFAM); IPR023214 (G3DSA:3.40.50.GENE3D); IPR023299 (G3DSA:3.40.1110.GENE3D); G3DSA:2.70.150.10 (GENE3D); PF00122 (PFAM); G3DSA:1.20.1110.10 (GENE3D); IPR006544 (PFAM); IPR004014 (PFAM); PF00702 (PFAM); IPR001757 (TIGRFAM); PTHR24093 (PANTHER); PTHR24093:SF373 (PANTHER); IPR018303 (PROSITE_PATTERNS); TRANSMEMBRANE (PHOBIUS); CYTOPLASMIC_DOMAIN (PHO…	F:GO:0000166; P:GO:0006812; C:GO:0016021; F:GO:0016887	F:nucleotide binding; P:cation transport; C:integral component of membrane; F:ATPase activity
TRUE	[INTERPRO, BLASTED, MAPPED, GO-SLIM]	scaffold_000043F_transcript_id_17129seq_length_663	glutathione S-transferase 1-1-like	663	20	2.66237e-129	77.6	1	F:GO:0003674	F:molecular_function			G3DSA:3.40.30.10 (GENE3D); IPR004045 (PFAM); G3DSA:1.20.1050.10 (GENE3D); IPR004046 (PFAM); PTHR43969 (PANTHER); IPR010987 (PROSITE_PROFILES); IPR004045 (PROSITE_PROFILES); cd03177 (CDD); cd03045 (CDD); IPR036249 (SUPERFAMILY); IPR036282 (SUPERFAMILY)	F:GO:0005515	F:protein binding
TRUE	[INTERPRO, BLASTED, MAPPED, GO-SLIM]	scaffold_000109F_transcript_id_5445seq_length_2917	proton-coupled amino acid transporter-like protein CG1139	2917	20	0	75.61	1	C:GO:0005575	C:cellular_component			IPR013057 (PFAM); PTHR22950 (PANTHER); PTHR22950:SF340 (PANTHER); TRANSMEMBRANE (PHOBIUS); CYTOPLASMIC_DOMAIN (PHOBIUS); TRANSMEMBRANE (PHOBIUS); NON_CYTOPLASMIC_DOMAIN (PHOBIUS); CYTOPLASMIC_DOMAIN (PHOBIUS); TRANSMEMBRANE (PHOBIUS); NON_CYTOPLASMIC_DOMAIN (PHOBIUS); TRANSMEMBRANE (PHOBIUS); NON_CYTOPLASMIC_DOMAIN (PHOBIUS); TRANSMEMBRANE (PHOBIUS); TRANSMEMBRANE (PHOBIUS); NON_CYTOPLASMIC_DOMAI…	no GO terms	no GO terms
TRUE	[INTERPRO, BLASTED, MAPPED, GO-SLIM]	scaffold_000154F_transcript_id_13372seq_length_2781	forkhead box protein F1-like	2781	20	0	75.28	6	F:GO:0003677; F:GO:0003700; C:GO:0005634; P:GO:0009058; C:GO:0032991; P:GO:0034641	F:DNA binding; F:DNA-binding transcription factor activity; C:nucleus; P:biosynthetic process; C:protein-containing complex; P:cellular nitrogen compound metabolic process			IPR001766 (PRINTS); IPR001766 (SMART); IPR036388 (G3DSA:1.10.10.GENE3D); IPR001766 (PFAM); mobidb-lite (MOBIDB_LITE); mobidb-lite (MOBIDB_LITE); mobidb-lite (MOBIDB_LITE); mobidb-lite (MOBIDB_LITE); mobidb-lite (MOBIDB_LITE); PTHR11829 (PANTHER); PTHR11829:SF186 (PANTHER); IPR018122 (PROSITE_PATTERNS); IPR030456 (PROSITE_PATTERNS); IPR001766 (PROSITE_PROFILES); IPR001766 (CDD); IPR036390 (SUPERFA…	F:GO:0003700; P:GO:0006355; F:GO:0043565	F:DNA-binding transcription factor activity; P:regulation of transcription, DNA-templated; F:sequence-specific DNA binding
TRUE	[INTERPRO, BLASTED, MAPPED, GO-SLIM]	scaffold_000675F_transcript_id_P42660.3seq_length_1626	venom serine carboxypeptidase-like	1626	20	0	63.68	1	F:GO:0003674	F:molecular_function			IPR001563 (PRINTS); IPR029058 (G3DSA:3.40.50.GENE3D); IPR029058 (G3DSA:3.40.50.GENE3D); IPR001563 (PFAM); PTHR11802:SF98 (PANTHER); IPR001563 (PANTHER); IPR018202 (PROSITE_PATTERNS); NON_CYTOPLASMIC_DOMAIN (PHOBIUS); SIGNAL_PEPTIDE_N_REGION (PHOBIUS); SIGNAL_PEPTIDE (PHOBIUS); SIGNAL_PEPTIDE_C_REGION (PHOBIUS); SIGNAL_PEPTIDE_H_REGION (PHOBIUS); SignalP-noTM (SIGNALP_EUK); IPR029058 (SUPERFAMILY)…	F:GO:0004185; P:GO:0006508	F:serine-type carboxypeptidase activity; P:proteolysis
TRUE	[INTERPRO, BLASTED, MAPPED, GO-SLIM]	scaffold_000148F_transcript_id_2073seq_length_1819	amine sulfotransferase-like	1819	20	0	73.51	1	F:GO:0003674	F:molecular_function			IPR000863 (PFAM); G3DSA:3.40.50.300 (GENE3D); PTHR11783 (PANTHER); PTHR11783:SF150 (PANTHER); IPR027417 (SUPERFAMILY)	F:GO:0008146	F:sulfotransferase activity
TRUE	[INTERPRO, BLASTED, MAPPED, GO-SLIM]	scaffold_000094F_transcript_id_20120seq_length_1742	UDP-xylose and UDP-N-acetylglucosamine transporter	1742	20	0	82.37	4	C:GO:0005737; C:GO:0005783; C:GO:0005794; F:GO:0022857	C:cytoplasm; C:endoplasmic reticulum; C:Golgi apparatus; F:transmembrane transporter activity			IPR013657 (PFAM); PTHR10778:SF4 (PANTHER); PTHR10778 (PANTHER); NON_CYTOPLASMIC_DOMAIN (PHOBIUS); TRANSMEMBRANE (PHOBIUS); TRANSMEMBRANE (PHOBIUS); TRANSMEMBRANE (PHOBIUS); CYTOPLASMIC_DOMAIN (PHOBIUS); CYTOPLASMIC_DOMAIN (PHOBIUS); TRANSMEMBRANE (PHOBIUS); CYTOPLASMIC_DOMAIN (PHOBIUS); TRANSMEMBRANE (PHOBIUS); NON_CYTOPLASMIC_DOMAIN (PHOBIUS); CYTOPLASMIC_DOMAIN (PHOBIUS); NON_CYTOPLASMIC_DOMAIN…	P:GO:0055085	P:transmembrane transport
TRUE	[INTERPRO, BLASTED, MAPPED, GO-SLIM]	scaffold_000005F_transcript_id_A0A0K8TPE4.1seq_length_543	programmed cell death protein 6	543	20	1.40097e-131	89.71	1	F:GO:0043167	F:ion binding			IPR002048 (SMART); G3DSA:1.10.238.10 (GENE3D); IPR002048 (PFAM); IPR002048 (PFAM); PTHR10183:SF272 (PANTHER); PTHR10183 (PANTHER); IPR018247 (PROSITE_PATTERNS); IPR002048 (PROSITE_PROFILES); cd16183 (CDD); IPR011992 (SUPERFAMILY)	F:GO:0005509	F:calcium ion binding
TRUE	[INTERPRO, BLASTED, MAPPED]	scaffold_000462F_transcript_id_1884seq_length_3290	organic cation transporter protein	3290	20	0	69.84	4	C:GO:0016020; C:GO:0016021; F:GO:0022857; P:GO:0055085	C:membrane; C:integral component of membrane; F:transmembrane transporter activity; P:transmembrane transport			IPR011701 (PFAM); G3DSA:1.20.1250.20 (GENE3D); mobidb-lite (MOBIDB_LITE); PTHR24064:SF428 (PANTHER); PTHR24064 (PANTHER); TRANSMEMBRANE (PHOBIUS); TRANSMEMBRANE (PHOBIUS); TRANSMEMBRANE (PHOBIUS); NON_CYTOPLASMIC_DOMAIN (PHOBIUS); CYTOPLASMIC_DOMAIN (PHOBIUS); TRANSMEMBRANE (PHOBIUS); TRANSMEMBRANE (PHOBIUS); CYTOPLASMIC_DOMAIN (PHOBIUS); TRANSMEMBRANE (PHOBIUS); CYTOPLASMIC_DOMAIN (PHOBIUS); CYT…	C:GO:0016021; P:GO:0055085	C:integral component of membrane; P:transmembrane transport
TRUE	[INTERPRO, BLASTED, MAPPED]	scaffold_000059F_transcript_id_15498seq_length_1370	carbohydrate sulfotransferase 5-like isoform X6	1370	20	0	60.02	4	F:GO:0008146; C:GO:0016020; C:GO:0016021; F:GO:0016740	F:sulfotransferase activity; C:membrane; C:integral component of membrane; F:transferase activity			G3DSA:3.40.50.300 (GENE3D); IPR000863 (PFAM); PTHR10704 (PANTHER); PTHR10704:SF44 (PANTHER); NON_CYTOPLASMIC_DOMAIN (PHOBIUS); SIGNAL_PEPTIDE_N_REGION (PHOBIUS); SIGNAL_PEPTIDE_H_REGION (PHOBIUS); SIGNAL_PEPTIDE (PHOBIUS); SIGNAL_PEPTIDE_C_REGION (PHOBIUS); IPR027417 (SUPERFAMILY)	F:GO:0008146	F:sulfotransferase activity
TRUE	[INTERPRO, BLASTED, MAPPED, GO-SLIM]	scaffold_000175F_transcript_id_4828seq_length_3037	adenylate cyclase type 2	3037	20	0	71.84	6	C:GO:0005623; P:GO:0009058; F:GO:0016829; P:GO:0034641; F:GO:0043167; P:GO:0044281	C:cell; P:biosynthetic process; F:lyase activity; P:cellular nitrogen compound metabolic process; F:ion binding; P:small molecule metabolic process			IPR001054 (SMART); IPR001054 (PFAM); IPR032628 (PFAM); IPR029787 (G3DSA:3.30.70.GENE3D); PTHR11920:SF352 (PANTHER); PTHR11920 (PANTHER); IPR018297 (PROSITE_PATTERNS); NON_CYTOPLASMIC_DOMAIN (PHOBIUS); NON_CYTOPLASMIC_DOMAIN (PHOBIUS); TRANSMEMBRANE (PHOBIUS); TRANSMEMBRANE (PHOBIUS); CYTOPLASMIC_DOMAIN (PHOBIUS); CYTOPLASMIC_DOMAIN (PHOBIUS); NON_CYTOPLASMIC_DOMAIN (PHOBIUS); TRANSMEMBRANE (PHOBI…	P:GO:0009190; F:GO:0016849; P:GO:0035556	P:cyclic nucleotide biosynthetic process; F:phosphorus-oxygen lyase activity; P:intracellular signal transduction
TRUE	[INTERPRO, BLASTED, MAPPED, GO-SLIM]	scaffold_000328F_transcript_id_1417seq_length_1950	4-aminobutyrate aminotransferase, mitochondrial	1950	20	0	80.9	2	P:GO:0006520; F:GO:0043167	P:cellular amino acid metabolic process; F:ion binding	EC:2.6.1.19	4-aminobutyrate--2-oxoglutarate transaminase	IPR005814 (PIRSF); IPR015421 (G3DSA:3.40.640.GENE3D); IPR015422 (G3DSA:3.90.1150.GENE3D); IPR004631 (TIGRFAM); IPR005814 (PFAM); PTHR43206:SF1 (PANTHER); PTHR43206 (PANTHER); IPR005814 (CDD); IPR015424 (SUPERFAMILY)	F:GO:0003824; F:GO:0003867; F:GO:0008483; P:GO:0009448; F:GO:0030170	F:catalytic activity; F:4-aminobutyrate transaminase activity; F:transaminase activity; P:gamma-aminobutyric acid metabolic process; F:pyridoxal phosphate binding
TRUE	[INTERPRO, BLASTED, MAPPED, GO-SLIM]	scaffold_000039F_transcript_id_22366seq_length_519	N-sulphoglucosamine sulphohydrolase	519	20	1.73835e-42	74.11	1	F:GO:0003674	F:molecular_function			IPR017849 (G3DSA:3.40.720.GENE3D); IPR000917 (PFAM); PTHR43108:SF6 (PANTHER); PTHR43108 (PANTHER); SIGNAL_PEPTIDE_C_REGION (PHOBIUS); SIGNAL_PEPTIDE_H_REGION (PHOBIUS); SIGNAL_PEPTIDE_N_REGION (PHOBIUS); SIGNAL_PEPTIDE (PHOBIUS); NON_CYTOPLASMIC_DOMAIN (PHOBIUS); SignalP-TM (SIGNALP_GRAM_POSITIVE); SignalP-noTM (SIGNALP_EUK); IPR017850 (SUPERFAMILY)	F:GO:0003824; P:GO:0008152; F:GO:0008484	F:catalytic activity; P:metabolic process; F:sulfuric ester hydrolase activity
TRUE	[INTERPRO, BLASTED]	scaffold_000050F_transcript_id_20174seq_length_2678	ankyrin repeat domain-containing protein 33-like isoform X2	2678	20	0	75.86						IPR002110 (PRINTS); IPR002110 (SMART); PF13637 (PFAM); IPR020683 (PFAM); IPR036770 (G3DSA:1.25.40.GENE3D); mobidb-lite (MOBIDB_LITE); PTHR24173:SF40 (PANTHER); PTHR24173 (PANTHER); IPR002110 (PROSITE_PROFILES); IPR002110 (PROSITE_PROFILES); IPR020683 (PROSITE_PROFILES); IPR020683 (CDD); IPR036770 (SUPERFAMILY)	F:GO:0005515	F:protein binding
TRUE	[INTERPRO, BLASTED]	scaffold_000050F_transcript_id_20236seq_length_2228	UDP-glucuronosyltransferase 2B18-like	2228	20	0	75.84						IPR002213 (PFAM); G3DSA:3.40.50.2000 (GENE3D); PTHR11926:SF151 (PANTHER); PTHR11926 (PANTHER); IPR035595 (PROSITE_PATTERNS); CYTOPLASMIC_DOMAIN (PHOBIUS); SIGNAL_PEPTIDE_H_REGION (PHOBIUS); SIGNAL_PEPTIDE_C_REGION (PHOBIUS); TRANSMEMBRANE (PHOBIUS); NON_CYTOPLASMIC_DOMAIN (PHOBIUS); SIGNAL_PEPTIDE (PHOBIUS); SIGNAL_PEPTIDE_N_REGION (PHOBIUS); SignalP-noTM (SIGNALP_EUK); SSF53756 (SUPERFAMILY); TM…	P:GO:0008152; F:GO:0016758	P:metabolic process; F:transferase activity, transferring hexosyl groups
TRUE	[INTERPRO, BLASTED, MAPPED]	scaffold_000514F_transcript_id_626seq_length_1651	sialin	1651	20	0	65.47	3	C:GO:0016020; C:GO:0016021; P:GO:0055085	C:membrane; C:integral component of membrane; P:transmembrane transport			G3DSA:1.20.1250.20 (GENE3D); G3DSA:1.20.1250.20 (GENE3D); IPR011701 (PFAM); PTHR11662 (PANTHER); PTHR11662:SF79 (PANTHER); CYTOPLASMIC_DOMAIN (PHOBIUS); NON_CYTOPLASMIC_DOMAIN (PHOBIUS); TRANSMEMBRANE (PHOBIUS); CYTOPLASMIC_DOMAIN (PHOBIUS); TRANSMEMBRANE (PHOBIUS); NON_CYTOPLASMIC_DOMAIN (PHOBIUS); NON_CYTOPLASMIC_DOMAIN (PHOBIUS); TRANSMEMBRANE (PHOBIUS); NON_CYTOPLASMIC_DOMAIN (PHOBIUS); CYTOP…	C:GO:0016021; P:GO:0055085	C:integral component of membrane; P:transmembrane transport
TRUE	[INTERPRO, BLASTED, MAPPED]	scaffold_000038F_transcript_id_8849seq_length_916	apyrase-like isoform X1	916	20	2.38935e-158	68.84	5	F:GO:0000166; P:GO:0009166; F:GO:0016787; F:GO:0016788; F:GO:0046872	F:nucleotide binding; P:nucleotide catabolic process; F:hydrolase activity; F:hydrolase activity, acting on ester bonds; F:metal ion binding			IPR006179 (PRINTS); IPR029052 (G3DSA:3.60.21.GENE3D); IPR004843 (PFAM); IPR006179 (PANTHER); PTHR11575:SF32 (PANTHER); SIGNAL_PEPTIDE_C_REGION (PHOBIUS); NON_CYTOPLASMIC_DOMAIN (PHOBIUS); SIGNAL_PEPTIDE (PHOBIUS); SIGNAL_PEPTIDE_N_REGION (PHOBIUS); SIGNAL_PEPTIDE_H_REGION (PHOBIUS); SignalP-noTM (SIGNALP_EUK); SignalP-noTM (SIGNALP_GRAM_NEGATIVE); SSF56300 (SUPERFAMILY)	P:GO:0009166; F:GO:0016787	P:nucleotide catabolic process; F:hydrolase activity
TRUE	[INTERPRO, BLASTED, MAPPED]	scaffold_000025F_transcript_id_20202seq_length_3681	maltase A3-like	3681	20	0	71.17	2	F:GO:0003824; P:GO:0005975	F:catalytic activity; P:carbohydrate metabolic process			IPR006047 (SMART); G3DSA:3.90.400.10 (GENE3D); G3DSA:3.20.20.80 (GENE3D); IPR006047 (PFAM); PTHR10357:SF177 (PANTHER); PTHR10357 (PANTHER); TRANSMEMBRANE (PHOBIUS); NON_CYTOPLASMIC_DOMAIN (PHOBIUS); CYTOPLASMIC_DOMAIN (PHOBIUS); cd11328 (CDD); IPR017853 (SUPERFAMILY); TMhelix (TMHMM)	F:GO:0003824; P:GO:0005975	F:catalytic activity; P:carbohydrate metabolic process
TRUE	[INTERPRO, BLASTED]	scaffold_000000F_transcript_id_27015seq_length_2326	facilitated trehalose transporter Tret1-like	2326	20	0	78.88						IPR003663 (PRINTS); G3DSA:1.20.1250.20 (GENE3D); IPR005828 (PFAM); PTHR23500 (PANTHER); PTHR23500:SF11 (PANTHER); TRANSMEMBRANE (PHOBIUS); TRANSMEMBRANE (PHOBIUS); TRANSMEMBRANE (PHOBIUS); CYTOPLASMIC_DOMAIN (PHOBIUS); TRANSMEMBRANE (PHOBIUS); TRANSMEMBRANE (PHOBIUS); NON_CYTOPLASMIC_DOMAIN (PHOBIUS); CYTOPLASMIC_DOMAIN (PHOBIUS); TRANSMEMBRANE (PHOBIUS); NON_CYTOPLASMIC_DOMAIN (PHOBIUS); TRANSME…	C:GO:0016020; C:GO:0016021; F:GO:0022857; P:GO:0055085	C:membrane; C:integral component of membrane; F:transmembrane transporter activity; P:transmembrane transport
TRUE	[INTERPRO, BLASTED, MAPPED, GO-SLIM]	scaffold_000105F_transcript_id_16627seq_length_3167	vacuolar protein sorting-associated protein 45	3167	20	0	81.88	1	P:GO:0016192	P:vesicle-mediated transport			Coil (COILS); G3DSA:3.90.830.10 (GENE3D); IPR001619 (PIRSF); G3DSA:1.25.40.60 (GENE3D); G3DSA:3.40.50.2060 (GENE3D); IPR027482 (G3DSA:3.40.50.GENE3D); IPR001619 (PFAM); IPR001619 (PANTHER); PTHR11679:SF3 (PANTHER); IPR036045 (SUPERFAMILY)	P:GO:0006904; P:GO:0016192	P:vesicle docking involved in exocytosis; P:vesicle-mediated transport
TRUE	[INTERPRO, BLASTED, MAPPED, GO-SLIM]	scaffold_000025F_transcript_id_20002seq_length_1398	cathepsin B-like	1398	20	0	70.73	1	F:GO:0008233	F:peptidase activity			IPR000668 (PRINTS); IPR000668 (SMART); G3DSA:3.90.70.10 (GENE3D); IPR012599 (PFAM); IPR000668 (PFAM); IPR013128 (PANTHER); PTHR12411:SF540 (PANTHER); IPR025661 (PROSITE_PATTERNS); IPR000169 (PROSITE_PATTERNS); NON_CYTOPLASMIC_DOMAIN (PHOBIUS); TRANSMEMBRANE (PHOBIUS); CYTOPLASMIC_DOMAIN (PHOBIUS); cd02620 (CDD); IPR038765 (SUPERFAMILY)	F:GO:0004197; P:GO:0006508; F:GO:0008234; P:GO:0050790	F:cysteine-type endopeptidase activity; P:proteolysis; F:cysteine-type peptidase activity; P:regulation of catalytic activity
TRUE	[INTERPRO, BLASTED, MAPPED, GO-SLIM]	scaffold_000094F_transcript_id_18788seq_length_1103	1,2-dihydroxy-3-keto-5-methylthiopentene dioxygenase	1103	20	9.11715e-132	84.99	8	P:GO:0000003; C:GO:0005634; C:GO:0005737; P:GO:0006520; P:GO:0006790; P:GO:0009058; F:GO:0016491; F:GO:0043167	P:reproduction; C:nucleus; C:cytoplasm; P:cellular amino acid metabolic process; P:sulfur compound metabolic process; P:biosynthetic process; F:oxidoreductase activity; F:ion binding	EC:1.13.11; EC:1.13.11.54	Acting on single donors with incorporation of molecular oxygen (oxygenases). The oxygen incorporated need not be derived from O(2); Acireductone dioxygenase (Fe(2+)-requiring)	IPR004313 (PFAM); IPR014710 (G3DSA:2.60.120.GENE3D); IPR004313 (PANTHER); NON_CYTOPLASMIC_DOMAIN (PHOBIUS); SIGNAL_PEPTIDE (PHOBIUS); SIGNAL_PEPTIDE_H_REGION (PHOBIUS); SIGNAL_PEPTIDE_N_REGION (PHOBIUS); SIGNAL_PEPTIDE_C_REGION (PHOBIUS); IPR027496 (HAMAP); SignalP-noTM (SIGNALP_EUK); IPR011051 (SUPERFAMILY)	F:GO:0010309; F:GO:0016491; P:GO:0019509; P:GO:0055114	F:acireductone dioxygenase [iron(II)-requiring] activity; F:oxidoreductase activity; P:L-methionine salvage from methylthioadenosine; P:oxidation-reduction process
TRUE	[INTERPRO, BLASTED, MAPPED]	scaffold_000369F_transcript_id_372seq_length_1439	constitutive coactivator of peroxisome proliferator-activated receptor gamma-like	1439	20	2.78327e-130	56.75	1	C:GO:0005634	C:nucleus			IPR026784 (PANTHER); PTHR15976:SF17 (PANTHER); IPR029060 (SUPERFAMILY)	C:GO:0005634	C:nucleus
TRUE	[INTERPRO, BLASTED, MAPPED]	scaffold_000144F_transcript_id_12108seq_length_1500	facilitated trehalose transporter Tret1-like	1500	20	0	64.53	6	F:GO:0005215; P:GO:0008643; C:GO:0016020; C:GO:0016021; F:GO:0022857; P:GO:0055085	F:transporter activity; P:carbohydrate transport; C:membrane; C:integral component of membrane; F:transmembrane transporter activity; P:transmembrane transport			G3DSA:1.20.1250.20 (GENE3D); IPR005828 (PFAM); PTHR23500 (PANTHER); PTHR23500:SF37 (PANTHER); IPR005829 (PROSITE_PATTERNS); IPR005829 (PROSITE_PATTERNS); TRANSMEMBRANE (PHOBIUS); NON_CYTOPLASMIC_DOMAIN (PHOBIUS); TRANSMEMBRANE (PHOBIUS); CYTOPLASMIC_DOMAIN (PHOBIUS); NON_CYTOPLASMIC_DOMAIN (PHOBIUS); NON_CYTOPLASMIC_DOMAIN (PHOBIUS); TRANSMEMBRANE (PHOBIUS); CYTOPLASMIC_DOMAIN (PHOBIUS); TRANSMEM…	F:GO:0005215; C:GO:0016021; F:GO:0022857; P:GO:0055085	F:transporter activity; C:integral component of membrane; F:transmembrane transporter activity; P:transmembrane transport
TRUE	[INTERPRO, BLASTED, MAPPED]	scaffold_000354F_transcript_id_13753seq_length_3231-1	ankyrin-1-like isoform X1	3231	20	0	58.34	2	F:GO:0004842; P:GO:0016567	F:ubiquitin-protein transferase activity; P:protein ubiquitination			IPR002110 (PRINTS); IPR002110 (SMART); IPR036770 (G3DSA:1.25.40.GENE3D); IPR036770 (G3DSA:1.25.40.GENE3D); IPR036770 (G3DSA:1.25.40.GENE3D); IPR002110 (PFAM); PF13857 (PFAM); IPR036770 (G3DSA:1.25.40.GENE3D); IPR036770 (G3DSA:1.25.40.GENE3D); IPR020683 (PFAM); PF13637 (PFAM); IPR036770 (G3DSA:1.25.40.GENE3D); PTHR43928 (PANTHER); IPR020683 (PROSITE_PROFILES); IPR002110 (PROSITE_PROFILES); IPR0021…	F:GO:0005515	F:protein binding
TRUE	[INTERPRO, BLASTED, MAPPED]	scaffold_000018F_transcript_id_24427seq_length_1903	type-1 angiotensin II receptor-associated protein isoform X1	1903	20	3.99947e-80	58.82	3	C:GO:0016020; C:GO:0016021; P:GO:0038166	C:membrane; C:integral component of membrane; P:angiotensin-activated signaling pathway			IPR009436 (SMART); IPR009436 (PFAM); IPR009436 (PANTHER); TRANSMEMBRANE (PHOBIUS); CYTOPLASMIC_DOMAIN (PHOBIUS); NON_CYTOPLASMIC_DOMAIN (PHOBIUS); TRANSMEMBRANE (PHOBIUS); CYTOPLASMIC_DOMAIN (PHOBIUS); TRANSMEMBRANE (PHOBIUS); TRANSMEMBRANE (PHOBIUS); NON_CYTOPLASMIC_DOMAIN (PHOBIUS); CYTOPLASMIC_DOMAIN (PHOBIUS); TMhelix (TMHMM); TMhelix (TMHMM); TMhelix (TMHMM); TMhelix (TMHMM)	P:GO:0038166	P:angiotensin-activated signaling pathway
TRUE	[INTERPRO, BLASTED, MAPPED]	scaffold_000006F_transcript_id_25489seq_length_1209	IQ and AAA domain-containing protein 1	1209	20	0	73.87	1	F:GO:0005524	F:ATP binding			Coil (COILS); IPR000048 (PFAM); G3DSA:1.20.5.190 (GENE3D); mobidb-lite (MOBIDB_LITE); mobidb-lite (MOBIDB_LITE); PTHR14690 (PANTHER); IPR000048 (PROSITE_PROFILES)	F:GO:0005515	F:protein binding
TRUE	[INTERPRO, BLASTED, MAPPED, GO-SLIM]	scaffold_000175F_transcript_id_4905seq_length_4095	dihydropyrimidine dehydrogenase [NADP(+)]	4095	20	0	85.67	6	C:GO:0005737; P:GO:0006520; P:GO:0009058; F:GO:0016491; P:GO:0034641; P:GO:0051186	C:cytoplasm; P:cellular amino acid metabolic process; P:biosynthetic process; F:oxidoreductase activity; P:cellular nitrogen compound metabolic process; P:cofactor metabolic process	EC:1.3.5.2; EC:1.3.1.2	Dihydroorotate dehydrogenase (quinone); Dihydropyrimidine dehydrogenase (NADP(+))	PR00419 (PRINTS); IPR005720 (TIGRFAM); IPR036188 (G3DSA:3.50.50.GENE3D); PF14697 (PFAM); IPR013785 (G3DSA:3.20.20.GENE3D); IPR023753 (PFAM); IPR009051 (G3DSA:1.10.1060.GENE3D); IPR028261 (PFAM); G3DSA:3.30.70.20 (GENE3D); G3DSA:3.30.70.20 (GENE3D); IPR036188 (G3DSA:3.50.50.GENE3D); IPR005720 (PFAM); mobidb-lite (MOBIDB_LITE); PTHR43073:SF2 (PANTHER); PTHR43073 (PANTHER); IPR017900 (PROSITE_PATTER…	F:GO:0003824; C:GO:0005737; F:GO:0016491; F:GO:0016627; F:GO:0051536; P:GO:0055114	F:catalytic activity; C:cytoplasm; F:oxidoreductase activity; F:oxidoreductase activity, acting on the CH-CH group of donors; F:iron-sulfur cluster binding; P:oxidation-reduction process
TRUE	[INTERPRO, BLASTED, MAPPED, GO-SLIM]	scaffold_000496F_transcript_id_6795seq_length_1588	arylsulfatase B	1588	20	0	84.48	2	F:GO:0003674; P:GO:0008150	F:molecular_function; P:biological_process			IPR017849 (G3DSA:3.40.720.GENE3D); IPR000917 (PFAM); PTHR10342:SF263 (PANTHER); PTHR10342 (PANTHER); IPR024607 (PROSITE_PATTERNS); NON_CYTOPLASMIC_DOMAIN (PHOBIUS); SIGNAL_PEPTIDE_H_REGION (PHOBIUS); SIGNAL_PEPTIDE (PHOBIUS); SIGNAL_PEPTIDE_N_REGION (PHOBIUS); SIGNAL_PEPTIDE_C_REGION (PHOBIUS); cd16029 (CDD); SignalP-noTM (SIGNALP_EUK); IPR017850 (SUPERFAMILY)	F:GO:0003824; P:GO:0008152; F:GO:0008484	F:catalytic activity; P:metabolic process; F:sulfuric ester hydrolase activity
TRUE	[INTERPRO, BLASTED, MAPPED]	scaffold_000064F_transcript_id_18038seq_length_1564	2-oxo-4-hydroxy-4-carboxy-5-ureidoimidazoline decarboxylase-like	1564	20	2.88754e-114	61.16	6	C:GO:0005777; P:GO:0006144; F:GO:0016829; F:GO:0016831; P:GO:0019428; P:GO:0019628	C:peroxisome; P:purine nucleobase metabolic process; F:lyase activity; F:carboxy-lyase activity; P:allantoin biosynthetic process; P:urate catabolic process			IPR017580 (TIGRFAM); IPR018020 (PFAM); IPR036778 (G3DSA:1.10.3330.GENE3D); PTHR43466 (PANTHER); IPR036778 (SUPERFAMILY)	P:GO:0019428	P:allantoin biosynthetic process
TRUE	[INTERPRO, BLASTED, MAPPED]	scaffold_000043F_transcript_id_15022seq_length_3276	breast cancer anti-estrogen resistance protein 3 isoform X1	3276	20	0	69.26	3	F:GO:0005085; C:GO:0005622; P:GO:0007264	F:guanyl-nucleotide exchange factor activity; C:intracellular; P:small GTPase mediated signal transduction			IPR000980 (PRINTS); IPR001895 (SMART); IPR001660 (SMART); IPR000980 (SMART); G3DSA:1.10.150.50 (GENE3D); IPR036964 (G3DSA:1.10.840.GENE3D); IPR036860 (G3DSA:3.30.505.GENE3D); IPR000980 (PFAM); IPR001895 (PFAM); IPR001660 (PFAM); mobidb-lite (MOBIDB_LITE); mobidb-lite (MOBIDB_LITE); PTHR14247:SF8 (PANTHER); PTHR14247 (PANTHER); IPR001660 (PROSITE_PROFILES); IPR000980 (PROSITE_PROFILES); IPR001895 …	F:GO:0005085; F:GO:0005515; P:GO:0007264	F:guanyl-nucleotide exchange factor activity; F:protein binding; P:small GTPase mediated signal transduction
TRUE	[INTERPRO, BLASTED, MAPPED]	scaffold_000257F_transcript_id_7658seq_length_2880	hydroxylysine kinase	2880	20	0	71.63	1	F:GO:0016740	F:transferase activity			IPR002575 (PFAM); G3DSA:3.90.1200.10 (GENE3D); PTHR21064 (PANTHER); IPR011009 (SUPERFAMILY)	no GO terms	no GO terms
TRUE	[INTERPRO, BLASTED, MAPPED, GO-SLIM]	scaffold_000004F_transcript_id_23927seq_length_3610	vesicular glutamate transporter 1 isoform X2	3610	20	0	76.89	1	C:GO:0005575	C:cellular_component			IPR011701 (PFAM); G3DSA:1.20.1250.20 (GENE3D); G3DSA:1.20.1250.20 (GENE3D); mobidb-lite (MOBIDB_LITE); mobidb-lite (MOBIDB_LITE); PTHR11662 (PANTHER); PTHR11662:SF406 (PANTHER); TRANSMEMBRANE (PHOBIUS); TRANSMEMBRANE (PHOBIUS); CYTOPLASMIC_DOMAIN (PHOBIUS); TRANSMEMBRANE (PHOBIUS); TRANSMEMBRANE (PHOBIUS); NON_CYTOPLASMIC_DOMAIN (PHOBIUS); TRANSMEMBRANE (PHOBIUS); TRANSMEMBRANE (PHOBIUS); TRANSME…	C:GO:0016021; P:GO:0055085	C:integral component of membrane; P:transmembrane transport
TRUE	[INTERPRO, BLASTED, MAPPED, GO-SLIM]	scaffold_000017F_transcript_id_23156seq_length_1804-1	putative methyltransferase DDB_G0268948	1804	20	7.11204e-98	83.54	1	F:GO:0008168	F:methyltransferase activity			IPR013216 (PFAM); G3DSA:3.40.50.150 (GENE3D); PTHR45180 (PANTHER); cd02440 (CDD); IPR029063 (SUPERFAMILY)	P:GO:0008152; F:GO:0008168	P:metabolic process; F:methyltransferase activity
TRUE	[INTERPRO, BLASTED, MAPPED]	scaffold_000109F_transcript_id_5536seq_length_1791	proton-coupled amino acid transporter-like protein CG1139	1791	20	0	69.12	2	C:GO:0016020; C:GO:0016021	C:membrane; C:integral component of membrane			IPR013057 (PFAM); mobidb-lite (MOBIDB_LITE); PTHR22950 (PANTHER); PTHR22950:SF340 (PANTHER); TRANSMEMBRANE (PHOBIUS); TRANSMEMBRANE (PHOBIUS); TRANSMEMBRANE (PHOBIUS); NON_CYTOPLASMIC_DOMAIN (PHOBIUS); NON_CYTOPLASMIC_DOMAIN (PHOBIUS); CYTOPLASMIC_DOMAIN (PHOBIUS); TRANSMEMBRANE (PHOBIUS); NON_CYTOPLASMIC_DOMAIN (PHOBIUS); CYTOPLASMIC_DOMAIN (PHOBIUS); TRANSMEMBRANE (PHOBIUS); TRANSMEMBRANE (PHOB…	no GO terms	no GO terms
TRUE	[INTERPRO, BLASTED, MAPPED, GO-SLIM]	scaffold_000025F_transcript_id_19851seq_length_2356	alpha-(1,6)-fucosyltransferase	2356	20	0	73.13	4	C:GO:0005794; P:GO:0006464; P:GO:0009058; F:GO:0016757	C:Golgi apparatus; P:cellular protein modification process; P:biosynthetic process; F:transferase activity, transferring glycosyl groups			Coil (COILS); IPR001452 (SMART); G3DSA:2.30.30.40 (GENE3D); G3DSA:3.40.50.11350 (GENE3D); G3DSA:1.10.287.1060 (GENE3D); PTHR13132:SF35 (PANTHER); PTHR13132 (PANTHER); NON_CYTOPLASMIC_DOMAIN (PHOBIUS); TRANSMEMBRANE (PHOBIUS); CYTOPLASMIC_DOMAIN (PHOBIUS); IPR001452 (PROSITE_PROFILES); IPR027350 (PROSITE_PROFILES); IPR035653 (CDD); cd11300 (CDD); IPR036028 (SUPERFAMILY); TMhelix (TMHMM)	F:GO:0005515	F:protein binding
TRUE	[INTERPRO, BLASTED]	scaffold_000196F_transcript_id_7431seq_length_2566	facilitated trehalose transporter Tret1-like	2566	20	0	70.56						G3DSA:1.20.1250.20 (GENE3D); IPR005828 (PFAM); PTHR23500 (PANTHER); PTHR23500:SF3 (PANTHER); NON_CYTOPLASMIC_DOMAIN (PHOBIUS); TRANSMEMBRANE (PHOBIUS); TRANSMEMBRANE (PHOBIUS); TRANSMEMBRANE (PHOBIUS); TRANSMEMBRANE (PHOBIUS); CYTOPLASMIC_DOMAIN (PHOBIUS); CYTOPLASMIC_DOMAIN (PHOBIUS); NON_CYTOPLASMIC_DOMAIN (PHOBIUS); TRANSMEMBRANE (PHOBIUS); CYTOPLASMIC_DOMAIN (PHOBIUS); TRANSMEMBRANE (PHOBIUS)…	C:GO:0016021; F:GO:0022857; P:GO:0055085	C:integral component of membrane; F:transmembrane transporter activity; P:transmembrane transport
TRUE	[INTERPRO, BLASTED, MAPPED]	scaffold_000131F_transcript_id_13939seq_length_3346	peptide transporter family 1 isoform X2	3346	20	0	73.14	6	F:GO:0005215; P:GO:0006857; C:GO:0016020; C:GO:0016021; F:GO:0022857; P:GO:0055085	F:transporter activity; P:oligopeptide transport; C:membrane; C:integral component of membrane; F:transmembrane transporter activity; P:transmembrane transport			IPR000109 (PFAM); G3DSA:1.20.1250.20 (GENE3D); G3DSA:1.20.1250.20 (GENE3D); PTHR11654:SF292 (PANTHER); IPR000109 (PANTHER); IPR018456 (PROSITE_PATTERNS); NON_CYTOPLASMIC_DOMAIN (PHOBIUS); TRANSMEMBRANE (PHOBIUS); TRANSMEMBRANE (PHOBIUS); NON_CYTOPLASMIC_DOMAIN (PHOBIUS); NON_CYTOPLASMIC_DOMAIN (PHOBIUS); TRANSMEMBRANE (PHOBIUS); CYTOPLASMIC_DOMAIN (PHOBIUS); CYTOPLASMIC_DOMAIN (PHOBIUS); NON_CYTO…	F:GO:0005215; P:GO:0006857; C:GO:0016020; F:GO:0022857; P:GO:0055085	F:transporter activity; P:oligopeptide transport; C:membrane; F:transmembrane transporter activity; P:transmembrane transport
TRUE	[INTERPRO, BLASTED, MAPPED, GO-SLIM]	scaffold_000004F_transcript_id_23882seq_length_1625	probable methylmalonate-semialdehyde dehydrogenase [acylating], mitochondrial	1625	20	0	86.15	6	C:GO:0005739; P:GO:0005975; P:GO:0006520; P:GO:0009056; F:GO:0016491; P:GO:0034641	C:mitochondrion; P:carbohydrate metabolic process; P:cellular amino acid metabolic process; P:catabolic process; F:oxidoreductase activity; P:cellular nitrogen compound metabolic process	EC:1.2.1.27; EC:1.2.1.18	Methylmalonate-semialdehyde dehydrogenase (CoA acylating); Malonate-semialdehyde dehydrogenase (acetylating)	IPR016163 (G3DSA:3.40.309.GENE3D); IPR015590 (PFAM); IPR016162 (G3DSA:3.40.605.GENE3D); IPR010061 (TIGRFAM); IPR010061 (PANTHER); PTHR43866:SF3 (PANTHER); IPR016160 (PROSITE_PATTERNS); IPR010061 (CDD); IPR016161 (SUPERFAMILY)	F:GO:0004491; P:GO:0008152; F:GO:0016491; F:GO:0016620; P:GO:0055114	F:methylmalonate-semialdehyde dehydrogenase (acylating) activity; P:metabolic process; F:oxidoreductase activity; F:oxidoreductase activity, acting on the aldehyde or oxo group of donors, NAD or NADP as acceptor; P:oxidation-reduction process
TRUE	[INTERPRO, BLASTED, MAPPED]	scaffold_000623F_transcript_id_4338seq_length_1987	amine sulfotransferase-like	1987	20	0	68.93	2	F:GO:0008146; F:GO:0016740	F:sulfotransferase activity; F:transferase activity			IPR000863 (PFAM); G3DSA:3.40.50.300 (GENE3D); PTHR11783 (PANTHER); PTHR11783:SF99 (PANTHER); IPR027417 (SUPERFAMILY)	F:GO:0008146	F:sulfotransferase activity
TRUE	[INTERPRO, BLASTED, MAPPED, GO-SLIM]	scaffold_001089F_transcript_id_3230seq_length_2432	plasma membrane calcium-transporting ATPase 2-like	2432	20	0	66.32	1	P:GO:0006810	P:transport			PR00119 (PRINTS); PF00702 (PFAM); IPR006068 (PFAM); G3DSA:1.20.1110.10 (GENE3D); IPR023299 (G3DSA:3.40.1110.GENE3D); PTHR24093 (PANTHER); IPR030325 (PTHR24093:PANTHER); TRANSMEMBRANE (PHOBIUS); CYTOPLASMIC_DOMAIN (PHOBIUS); NON_CYTOPLASMIC_DOMAIN (PHOBIUS); CYTOPLASMIC_DOMAIN (PHOBIUS); NON_CYTOPLASMIC_DOMAIN (PHOBIUS); NON_CYTOPLASMIC_DOMAIN (PHOBIUS); TRANSMEMBRANE (PHOBIUS); TRANSMEMBRANE (PHO…	F:GO:0000166	F:nucleotide binding
TRUE	[INTERPRO, BLASTED, MAPPED, GO-SLIM]	scaffold_001070F_transcript_id_410seq_length_3178	nose resistant to fluoxetine protein 6-like	3178	20	0	55.46	1	F:GO:0003674	F:molecular_function			IPR006621 (SMART); IPR002656 (PFAM); mobidb-lite (MOBIDB_LITE); mobidb-lite (MOBIDB_LITE); PTHR11161 (PANTHER); TRANSMEMBRANE (PHOBIUS); CYTOPLASMIC_DOMAIN (PHOBIUS); NON_CYTOPLASMIC_DOMAIN (PHOBIUS); SIGNAL_PEPTIDE_N_REGION (PHOBIUS); CYTOPLASMIC_DOMAIN (PHOBIUS); TRANSMEMBRANE (PHOBIUS); TRANSMEMBRANE (PHOBIUS); TRANSMEMBRANE (PHOBIUS); TRANSMEMBRANE (PHOBIUS); SIGNAL_PEPTIDE (PHOBIUS); TRANSME…	F:GO:0016747	F:transferase activity, transferring acyl groups other than amino-acyl groups
TRUE	[INTERPRO, BLASTED, MAPPED, GO-SLIM]	scaffold_000048F_transcript_id_17225seq_length_1980	protein mothers against dpp	1980	20	0	83.62	8	F:GO:0003677; F:GO:0003700; C:GO:0005634; C:GO:0005737; P:GO:0007165; P:GO:0009058; C:GO:0032991; P:GO:0034641	F:DNA binding; F:DNA-binding transcription factor activity; C:nucleus; C:cytoplasm; P:signal transduction; P:biosynthetic process; C:protein-containing complex; P:cellular nitrogen compound metabolic process			Coil (COILS); IPR003619 (SMART); IPR001132 (SMART); IPR036578 (G3DSA:3.90.520.GENE3D); IPR017855 (G3DSA:2.60.200.GENE3D); IPR001132 (PFAM); IPR003619 (PFAM); mobidb-lite (MOBIDB_LITE); mobidb-lite (MOBIDB_LITE); IPR013790 (PANTHER); PTHR13703:SF36 (PANTHER); IPR013790 (PANTHER); PTHR13703:SF36 (PANTHER); IPR001132 (PROSITE_PROFILES); IPR013019 (PROSITE_PROFILES); cd10490 (CDD); IPR008984 (SUPERFA…	F:GO:0003700; F:GO:0005515; C:GO:0005622; C:GO:0005667; P:GO:0006355; P:GO:0007179	F:DNA-binding transcription factor activity; F:protein binding; C:intracellular; C:transcription factor complex; P:regulation of transcription, DNA-templated; P:transforming growth factor beta receptor signaling pathway
TRUE	[INTERPRO, BLASTED, MAPPED]	scaffold_001298F_transcript_id_1400seq_length_3309	Zinc finger MIZ domain-containing protein 1	3309	20	0	75.26	1	F:GO:0008270	F:zinc ion binding			IPR004181 (PFAM); IPR013083 (G3DSA:3.30.40.GENE3D); mobidb-lite (MOBIDB_LITE); mobidb-lite (MOBIDB_LITE); PTHR10782 (PANTHER); PTHR10782:SF38 (PANTHER); IPR004181 (PROSITE_PROFILES); cd16791 (CDD)	F:GO:0008270	F:zinc ion binding
TRUE	[INTERPRO, BLASTED, MAPPED, GO-SLIM]	scaffold_000552F_transcript_id_84seq_length_1893	3-ketodihydrosphingosine reductase	1893	20	0	72.99	1	C:GO:0005575	C:cellular_component			IPR002347 (PRINTS); IPR002347 (PRINTS); G3DSA:3.40.50.720 (GENE3D); IPR002347 (PFAM); PTHR43550:SF3 (PANTHER); PTHR43550 (PANTHER); IPR020904 (PROSITE_PATTERNS); cd08939 (CDD); IPR036291 (SUPERFAMILY)	F:GO:0016491	F:oxidoreductase activity
TRUE	[INTERPRO, BLASTED, MAPPED]	scaffold_000002F_transcript_id_25263seq_length_1340	probable isoaspartyl peptidase/L-asparaginase GA20639 isoform X2	1340	20	0	70.68	2	F:GO:0004067; F:GO:0016787	F:asparaginase activity; F:hydrolase activity			G3DSA:3.60.20.30 (GENE3D); IPR000246 (PFAM); IPR000246 (PANTHER); PTHR10188:SF25 (PANTHER); IPR033844 (CDD); IPR029055 (SUPERFAMILY)	F:GO:0004067; F:GO:0016787	F:asparaginase activity; F:hydrolase activity
TRUE	[INTERPRO, BLASTED]	scaffold_000097F_transcript_id_10892seq_length_3255	ankyrin-1-like isoform X1	3255	20	0	59.4						IPR002110 (PRINTS); IPR002110 (SMART); IPR036770 (G3DSA:1.25.40.GENE3D); IPR036770 (G3DSA:1.25.40.GENE3D); IPR036770 (G3DSA:1.25.40.GENE3D); IPR036770 (G3DSA:1.25.40.GENE3D); IPR020683 (PFAM); PF13637 (PFAM); IPR002110 (PFAM); IPR036770 (G3DSA:1.25.40.GENE3D); IPR036770 (G3DSA:1.25.40.GENE3D); PTHR44181 (PANTHER); IPR002110 (PROSITE_PROFILES); IPR002110 (PROSITE_PROFILES); IPR002110 (PROSITE_PROF…	F:GO:0005515	F:protein binding
TRUE	[INTERPRO, BLASTED, MAPPED, GO-SLIM]	scaffold_000675F_transcript_id_830seq_length_2390	venom serine carboxypeptidase-like	2390	20	0	69.78	1	F:GO:0003674	F:molecular_function			IPR001563 (PRINTS); IPR029058 (G3DSA:3.40.50.GENE3D); IPR001563 (PFAM); PTHR11802:SF98 (PANTHER); IPR001563 (PANTHER); IPR018202 (PROSITE_PATTERNS); SIGNAL_PEPTIDE_C_REGION (PHOBIUS); SIGNAL_PEPTIDE (PHOBIUS); SIGNAL_PEPTIDE_N_REGION (PHOBIUS); SIGNAL_PEPTIDE_H_REGION (PHOBIUS); NON_CYTOPLASMIC_DOMAIN (PHOBIUS); SignalP-noTM (SIGNALP_EUK); IPR029058 (SUPERFAMILY)	F:GO:0004185; P:GO:0006508	F:serine-type carboxypeptidase activity; P:proteolysis
TRUE	[INTERPRO, BLASTED, MAPPED]	scaffold_000002F_transcript_id_24678seq_length_2013	regucalcin-like isoform X1	2013	20	0	69.06	4	F:GO:0005509; F:GO:0030234; F:GO:0046872; P:GO:0050790	F:calcium ion binding; F:enzyme regulator activity; F:metal ion binding; P:regulation of catalytic activity			IPR005511 (PRINTS); IPR008367 (PRINTS); IPR011042 (G3DSA:2.120.10.GENE3D); IPR013658 (PFAM); PTHR10907:SF47 (PANTHER); IPR039096 (PANTHER); SSF63829 (SUPERFAMILY)	F:GO:0005509; F:GO:0030234	F:calcium ion binding; F:enzyme regulator activity
TRUE	[INTERPRO, BLASTED, MAPPED, GO-SLIM]	scaffold_000044F_transcript_id_15910seq_length_2201	UDP-glucuronosyltransferase 2B13-like isoform X1	2201	20	0	66.54	1	F:GO:0003674	F:molecular_function			G3DSA:3.40.50.2000 (GENE3D); G3DSA:3.40.50.2000 (GENE3D); IPR002213 (PFAM); PTHR11926:SF151 (PANTHER); PTHR11926 (PANTHER); TRANSMEMBRANE (PHOBIUS); CYTOPLASMIC_DOMAIN (PHOBIUS); SIGNAL_PEPTIDE_C_REGION (PHOBIUS); SIGNAL_PEPTIDE_H_REGION (PHOBIUS); SIGNAL_PEPTIDE (PHOBIUS); NON_CYTOPLASMIC_DOMAIN (PHOBIUS); SIGNAL_PEPTIDE_N_REGION (PHOBIUS); SignalP-noTM (SIGNALP_EUK); SSF53756 (SUPERFAMILY); TMh…	P:GO:0008152; F:GO:0016758	P:metabolic process; F:transferase activity, transferring hexosyl groups
TRUE	[INTERPRO, BLASTED, MAPPED, GO-SLIM]	scaffold_000262F_transcript_id_10998seq_length_3094	adenine phosphoribosyltransferase	3094	20	3.47919e-114	75.1	3	F:GO:0016757; P:GO:0034641; P:GO:0044281	F:transferase activity, transferring glycosyl groups; P:cellular nitrogen compound metabolic process; P:small molecule metabolic process			G3DSA:3.40.50.2020 (GENE3D); IPR005764 (TIGRFAM); IPR000836 (PFAM); PTHR32315 (PANTHER); IPR005764 (HAMAP); IPR000836 (CDD); IPR029057 (SUPERFAMILY)	F:GO:0003999; C:GO:0005737; P:GO:0006168; P:GO:0009116	F:adenine phosphoribosyltransferase activity; C:cytoplasm; P:adenine salvage; P:nucleoside metabolic process
TRUE	[INTERPRO, BLASTED, MAPPED]	scaffold_000078F_transcript_id_18633seq_length_2759	RNA-directed DNA polymerase from mobile element jockey-like	2759	20	1.76583e-176	63.11	2	F:GO:0003964; P:GO:0006278	F:RNA-directed DNA polymerase activity; P:RNA-dependent DNA biosynthetic process			Coil (COILS); IPR000477 (PFAM); PTHR45030 (PANTHER); IPR000477 (PROSITE_PROFILES); cd01650 (CDD); SSF56672 (SUPERFAMILY)	no GO terms	no GO terms
TRUE	[INTERPRO, BLASTED, MAPPED, GO-SLIM]	scaffold_000265F_transcript_id_14289seq_length_3156	facilitated trehalose transporter Tret1-like isoform X1	3156	20	0	64.93	2	F:GO:0003674; P:GO:0006810	F:molecular_function; P:transport			IPR005828 (PFAM); PTHR23500 (PANTHER); PTHR23500 (PANTHER); PTHR23500:SF3 (PANTHER); PTHR23500:SF3 (PANTHER); TRANSMEMBRANE (PHOBIUS); NON_CYTOPLASMIC_DOMAIN (PHOBIUS); TRANSMEMBRANE (PHOBIUS); TRANSMEMBRANE (PHOBIUS); CYTOPLASMIC_DOMAIN (PHOBIUS); CYTOPLASMIC_DOMAIN (PHOBIUS); CYTOPLASMIC_DOMAIN (PHOBIUS); CYTOPLASMIC_DOMAIN (PHOBIUS); TRANSMEMBRANE (PHOBIUS); NON_CYTOPLASMIC_DOMAIN (PHOBIUS); C…	C:GO:0016021; F:GO:0022857; P:GO:0055085	C:integral component of membrane; F:transmembrane transporter activity; P:transmembrane transport
TRUE	[INTERPRO, BLASTED]	scaffold_000197F_transcript_id_8848seq_length_1195	maltase A3-like	1195	20	3.59821e-106	81.68						IPR006047 (SMART); G3DSA:3.90.400.10 (GENE3D); IPR006047 (PFAM); G3DSA:3.20.20.80 (GENE3D); PTHR10357:SF177 (PANTHER); PTHR10357 (PANTHER); SIGNAL_PEPTIDE_N_REGION (PHOBIUS); SIGNAL_PEPTIDE_C_REGION (PHOBIUS); SIGNAL_PEPTIDE_H_REGION (PHOBIUS); SIGNAL_PEPTIDE (PHOBIUS); NON_CYTOPLASMIC_DOMAIN (PHOBIUS); SignalP-noTM (SIGNALP_EUK); IPR017853 (SUPERFAMILY)	F:GO:0003824; P:GO:0005975	F:catalytic activity; P:carbohydrate metabolic process
TRUE	[INTERPRO, BLASTED]	scaffold_000038F_transcript_id_7746seq_length_2947	UDP-glucuronosyltransferase 2B18-like	2947	20	0	75.47						G3DSA:3.40.50.2000 (GENE3D); IPR002213 (PFAM); G3DSA:3.40.50.2000 (GENE3D); PTHR11926 (PANTHER); PTHR11926:SF151 (PANTHER); IPR035595 (PROSITE_PATTERNS); TRANSMEMBRANE (PHOBIUS); SIGNAL_PEPTIDE (PHOBIUS); SIGNAL_PEPTIDE_C_REGION (PHOBIUS); NON_CYTOPLASMIC_DOMAIN (PHOBIUS); SIGNAL_PEPTIDE_N_REGION (PHOBIUS); SIGNAL_PEPTIDE_H_REGION (PHOBIUS); CYTOPLASMIC_DOMAIN (PHOBIUS); SSF53756 (SUPERFAMILY); T…	P:GO:0008152; F:GO:0016758	P:metabolic process; F:transferase activity, transferring hexosyl groups
TRUE	[INTERPRO, BLASTED, MAPPED, GO-SLIM]	scaffold_000009F_transcript_id_27116seq_length_2662	myosin-G heavy chain	2662	20	0	83.06	4	F:GO:0003924; C:GO:0005575; P:GO:0007165; F:GO:0043167	F:GTPase activity; C:cellular_component; P:signal transduction; F:ion binding	EC:3.6.1.15	Nucleoside-triphosphate phosphatase	PR00449 (PRINTS); SM00175 (SMART); SM00174 (SMART); SM00173 (SMART); G3DSA:3.40.50.300 (GENE3D); IPR001806 (PFAM); mobidb-lite (MOBIDB_LITE); IPR020849 (PANTHER); PTHR24070:SF303 (PANTHER); IPR020849 (PROSITE_PROFILES); cd04148 (CDD); IPR027417 (SUPERFAMILY)	F:GO:0003924; F:GO:0005525; P:GO:0007165; C:GO:0016020	F:GTPase activity; F:GTP binding; P:signal transduction; C:membrane
TRUE	[INTERPRO, BLASTED, MAPPED]	scaffold_000242F_transcript_id_16208seq_length_903	Protein 5NUC	903	20	3.73061e-154	63.86	7	F:GO:0000166; P:GO:0009166; C:GO:0016020; C:GO:0016021; F:GO:0016787; F:GO:0016788; F:GO:0046872	F:nucleotide binding; P:nucleotide catabolic process; C:membrane; C:integral component of membrane; F:hydrolase activity; F:hydrolase activity, acting on ester bonds; F:metal ion binding			IPR006179 (PRINTS); IPR008334 (PFAM); IPR036907 (G3DSA:3.90.780.GENE3D); PTHR11575:SF32 (PANTHER); IPR006179 (PANTHER); IPR036907 (SUPERFAMILY)	P:GO:0009166; F:GO:0016787	P:nucleotide catabolic process; F:hydrolase activity
TRUE	[INTERPRO, BLASTED]	scaffold_000045F_transcript_id_18841seq_length_1902	probable maltase	1902	20	0	69.13						IPR006047 (SMART); IPR006047 (PFAM); G3DSA:3.20.20.80 (GENE3D); G3DSA:3.90.400.10 (GENE3D); PTHR10357 (PANTHER); PTHR10357:SF177 (PANTHER); SIGNAL_PEPTIDE_N_REGION (PHOBIUS); SIGNAL_PEPTIDE_H_REGION (PHOBIUS); NON_CYTOPLASMIC_DOMAIN (PHOBIUS); SIGNAL_PEPTIDE (PHOBIUS); SIGNAL_PEPTIDE_C_REGION (PHOBIUS); SignalP-TM (SIGNALP_GRAM_POSITIVE); SignalP-noTM (SIGNALP_GRAM_NEGATIVE); SignalP-noTM (SIGNAL…	F:GO:0003824; P:GO:0005975	F:catalytic activity; P:carbohydrate metabolic process
TRUE	[INTERPRO, BLASTED, MAPPED, GO-SLIM]	scaffold_000491F_transcript_id_3877seq_length_1679	esterase FE4-like	1679	20	2.6074e-84	71.47	1	F:GO:0003674	F:molecular_function			IPR002018 (PFAM); IPR029058 (G3DSA:3.40.50.GENE3D); PTHR11559 (PANTHER); PTHR11559:SF345 (PANTHER); IPR029058 (SUPERFAMILY)	no GO terms	no GO terms
TRUE	[INTERPRO, BLASTED, MAPPED]	scaffold_000025F_transcript_id_19215seq_length_2493	endonuclease-reverse transcriptase	2493	20	0	62.51	4	F:GO:0003964; F:GO:0004519; P:GO:0006278; P:GO:0090305	F:RNA-directed DNA polymerase activity; F:endonuclease activity; P:RNA-dependent DNA biosynthetic process; P:nucleic acid phosphodiester bond hydrolysis			Coil (COILS); IPR000477 (PFAM); PTHR45030 (PANTHER); IPR000477 (PROSITE_PROFILES); cd01650 (CDD); SSF56672 (SUPERFAMILY)	no GO terms	no GO terms
TRUE	[INTERPRO, BLASTED, MAPPED]	scaffold_000587F_transcript_id_1126seq_length_2650	sodium/potassium/calcium exchanger 4-like	2650	20	0	65.76	3	C:GO:0016020; C:GO:0016021; P:GO:0055085	C:membrane; C:integral component of membrane; P:transmembrane transport			IPR004481 (TIGRFAM); G3DSA:1.20.1420.30 (GENE3D); IPR004837 (PFAM); PTHR10846:SF42 (PANTHER); IPR004481 (PANTHER); TRANSMEMBRANE (PHOBIUS); CYTOPLASMIC_DOMAIN (PHOBIUS); TRANSMEMBRANE (PHOBIUS); NON_CYTOPLASMIC_DOMAIN (PHOBIUS); CYTOPLASMIC_DOMAIN (PHOBIUS); TRANSMEMBRANE (PHOBIUS); TRANSMEMBRANE (PHOBIUS); TRANSMEMBRANE (PHOBIUS); TRANSMEMBRANE (PHOBIUS); TRANSMEMBRANE (PHOBIUS); NON_CYTOPLASMIC…	C:GO:0016021; P:GO:0055085	C:integral component of membrane; P:transmembrane transport
TRUE	[INTERPRO, BLASTED, MAPPED, GO-SLIM]	scaffold_000080F_transcript_id_10553seq_length_3188-1	nose resistant to fluoxetine protein 6-like	3188	20	0	56.07	1	F:GO:0003674	F:molecular_function			IPR006621 (SMART); IPR002656 (PFAM); PTHR11161 (PANTHER); TRANSMEMBRANE (PHOBIUS); CYTOPLASMIC_DOMAIN (PHOBIUS); NON_CYTOPLASMIC_DOMAIN (PHOBIUS); NON_CYTOPLASMIC_DOMAIN (PHOBIUS); NON_CYTOPLASMIC_DOMAIN (PHOBIUS); CYTOPLASMIC_DOMAIN (PHOBIUS); NON_CYTOPLASMIC_DOMAIN (PHOBIUS); TRANSMEMBRANE (PHOBIUS); SIGNAL_PEPTIDE_N_REGION (PHOBIUS); TRANSMEMBRANE (PHOBIUS); CYTOPLASMIC_DOMAIN (PHOBIUS); TRANS…	F:GO:0016747	F:transferase activity, transferring acyl groups other than amino-acyl groups
TRUE	[INTERPRO, BLASTED]	scaffold_000012F_transcript_id_21526seq_length_1531	macrophage migration inhibitory factor-like	1531	20	2.01697e-62	76.89						IPR001398 (PFAM); IPR014347 (G3DSA:3.30.429.GENE3D); IPR001398 (PANTHER); PTHR11954:SF6 (PANTHER); IPR001398 (PRODOM); IPR014347 (SUPERFAMILY)	no GO terms	no GO terms
TRUE	[INTERPRO, BLASTED, MAPPED]	scaffold_000045F_transcript_id_19157seq_length_999	platelet-activating factor acetylhydrolase IB subunit beta homolog	999	20	4.08779e-154	72.51	1	F:GO:0016787	F:hydrolase activity			IPR013830 (PFAM); IPR036514 (G3DSA:3.40.50.GENE3D); PTHR11852:SF2 (PANTHER); PTHR11852 (PANTHER); SSF52266 (SUPERFAMILY)	no GO terms	no GO terms
TRUE	[INTERPRO, BLASTED, MAPPED, GO-SLIM]	scaffold_000128F_transcript_id_15577seq_length_1392	cysteine-rich protein 1-like	1392	20	2.94956e-36	93.61	1	F:GO:0043167	F:ion binding			IPR001781 (SMART); G3DSA:2.10.110.10 (GENE3D); IPR001781 (PFAM); PTHR24208 (PANTHER); PTHR24208:SF87 (PANTHER); IPR001781 (PROSITE_PATTERNS); IPR001781 (PROSITE_PROFILES); cd09401 (CDD); SSF57716 (SUPERFAMILY); SSF57716 (SUPERFAMILY)	no GO terms	no GO terms
TRUE	[INTERPRO, BLASTED, MAPPED, GO-SLIM]	scaffold_000346F_transcript_id_6516seq_length_1902	CAAX prenyl protease 1 homolog	1902	20	0	73.87	2	C:GO:0005575; F:GO:0008233	C:cellular_component; F:peptidase activity			Coil (COILS); G3DSA:3.30.2010.10 (GENE3D); IPR032456 (PFAM); IPR001915 (PFAM); mobidb-lite (MOBIDB_LITE); PTHR10120:SF24 (PANTHER); IPR027057 (PANTHER); CYTOPLASMIC_DOMAIN (PHOBIUS); TRANSMEMBRANE (PHOBIUS); NON_CYTOPLASMIC_DOMAIN (PHOBIUS); CYTOPLASMIC_DOMAIN (PHOBIUS); TRANSMEMBRANE (PHOBIUS); TRANSMEMBRANE (PHOBIUS); TRANSMEMBRANE (PHOBIUS); NON_CYTOPLASMIC_DOMAIN (PHOBIUS); TRANSMEMBRANE (PHO…	F:GO:0004222; P:GO:0006508; F:GO:0008233; P:GO:0071586	F:metalloendopeptidase activity; P:proteolysis; F:peptidase activity; P:CAAX-box protein processing
TRUE	[INTERPRO, BLASTED, MAPPED, GO-SLIM]	scaffold_000170F_transcript_id_2783seq_length_1816	lambda-crystallin homolog	1816	20	0	79.12	7	P:GO:0006520; P:GO:0006629; P:GO:0009056; P:GO:0009058; F:GO:0016491; P:GO:0034641; F:GO:0043167	P:cellular amino acid metabolic process; P:lipid metabolic process; P:catabolic process; P:biosynthetic process; F:oxidoreductase activity; P:cellular nitrogen compound metabolic process; F:ion binding	EC:1.1.1.35	3-hydroxyacyl-CoA dehydrogenase	Coil (COILS); IPR006108 (PFAM); IPR006176 (PFAM); G3DSA:3.40.50.720 (GENE3D); IPR022694 (PIRSF); IPR013328 (G3DSA:1.10.1040.GENE3D); PTHR43492:SF2 (PANTHER); PTHR43492 (PANTHER); IPR006180 (PROSITE_PATTERNS); IPR036291 (SUPERFAMILY); IPR008927 (SUPERFAMILY)	F:GO:0003857; P:GO:0006631; F:GO:0016491; P:GO:0055114; F:GO:0070403	F:3-hydroxyacyl-CoA dehydrogenase activity; P:fatty acid metabolic process; F:oxidoreductase activity; P:oxidation-reduction process; F:NAD+ binding
TRUE	[INTERPRO, BLASTED, MAPPED, GO-SLIM]	scaffold_000004F_transcript_id_24386seq_length_2357	pyridoxal kinase	2357	20	0	73.03	1	F:GO:0016301	F:kinase activity			IPR004625 (TIGRFAM); IPR013749 (PFAM); IPR029056 (G3DSA:3.40.1190.GENE3D); IPR004625 (PANTHER); PTHR10534:SF2 (PANTHER); IPR004625 (CDD); IPR029056 (SUPERFAMILY)	F:GO:0008478; P:GO:0009443	F:pyridoxal kinase activity; P:pyridoxal 5'-phosphate salvage
TRUE	[INTERPRO, BLASTED, MAPPED, GO-SLIM]	scaffold_000327F_transcript_id_4390seq_length_2335	UDP-glucuronosyltransferase 2B13-like isoform X1	2335	20	0	63.82	1	F:GO:0003674	F:molecular_function			IPR002213 (PFAM); G3DSA:3.40.50.2000 (GENE3D); PTHR11926 (PANTHER); PTHR11926:SF151 (PANTHER); SIGNAL_PEPTIDE_N_REGION (PHOBIUS); SIGNAL_PEPTIDE_C_REGION (PHOBIUS); CYTOPLASMIC_DOMAIN (PHOBIUS); NON_CYTOPLASMIC_DOMAIN (PHOBIUS); SIGNAL_PEPTIDE_H_REGION (PHOBIUS); TRANSMEMBRANE (PHOBIUS); SIGNAL_PEPTIDE (PHOBIUS); SignalP-noTM (SIGNALP_EUK); SignalP-noTM (SIGNALP_GRAM_NEGATIVE); SSF53756 (SUPERFAM…	P:GO:0008152; F:GO:0016758	P:metabolic process; F:transferase activity, transferring hexosyl groups
TRUE	[INTERPRO, BLASTED, MAPPED]	scaffold_000018F_transcript_id_23834seq_length_1049	orcokinin peptides type A-like isoform X2	1049	20	1.77012e-97	72.3	1	P:GO:0007218	P:neuropeptide signaling pathway			mobidb-lite (MOBIDB_LITE); PTHR33864 (PANTHER); PTHR33864:SF4 (PANTHER); TRANSMEMBRANE (PHOBIUS); NON_CYTOPLASMIC_DOMAIN (PHOBIUS); CYTOPLASMIC_DOMAIN (PHOBIUS)	no GO terms	no GO terms
TRUE	[INTERPRO, BLASTED]	scaffold_000247F_transcript_id_8532seq_length_2556	facilitated trehalose transporter Tret1-like	2556	20	0	65.03						IPR005828 (PFAM); G3DSA:1.20.1250.20 (GENE3D); PTHR23500:SF3 (PANTHER); PTHR23500 (PANTHER); PTHR23500:SF3 (PANTHER); PTHR23500 (PANTHER); TRANSMEMBRANE (PHOBIUS); CYTOPLASMIC_DOMAIN (PHOBIUS); NON_CYTOPLASMIC_DOMAIN (PHOBIUS); NON_CYTOPLASMIC_DOMAIN (PHOBIUS); NON_CYTOPLASMIC_DOMAIN (PHOBIUS); CYTOPLASMIC_DOMAIN (PHOBIUS); NON_CYTOPLASMIC_DOMAIN (PHOBIUS); TRANSMEMBRANE (PHOBIUS); CYTOPLASMIC_DO…	C:GO:0016021; F:GO:0022857; P:GO:0055085	C:integral component of membrane; F:transmembrane transporter activity; P:transmembrane transport
TRUE	[INTERPRO, BLASTED, MAPPED, GO-SLIM]	scaffold_000158F_transcript_id_8226seq_length_3333	dynein beta chain, ciliary-like	3333	20	0	60.86	1	F:GO:0003674	F:molecular_function			Coil (COILS); Coil (COILS); IPR013602 (PFAM); IPR013594 (PFAM); IPR026983 (PANTHER); PTHR10676:SF347 (PANTHER); PTHR10676:SF347 (PANTHER); IPR026983 (PANTHER)	F:GO:0003777; P:GO:0007018	F:microtubule motor activity; P:microtubule-based movement
TRUE	[INTERPRO, BLASTED]	scaffold_000114F_transcript_id_14159seq_length_1599	facilitated trehalose transporter Tret1-like	1599	20	4.23847e-132	74.98						G3DSA:1.20.1250.20 (GENE3D); IPR005828 (PFAM); PTHR23500 (PANTHER); PTHR23500:SF3 (PANTHER); IPR005829 (PROSITE_PATTERNS); TRANSMEMBRANE (PHOBIUS); TRANSMEMBRANE (PHOBIUS); CYTOPLASMIC_DOMAIN (PHOBIUS); CYTOPLASMIC_DOMAIN (PHOBIUS); NON_CYTOPLASMIC_DOMAIN (PHOBIUS); NON_CYTOPLASMIC_DOMAIN (PHOBIUS); TRANSMEMBRANE (PHOBIUS); IPR020846 (PROSITE_PROFILES); IPR020846 (CDD); IPR036259 (SUPERFAMILY); T…	F:GO:0005215; C:GO:0016021; F:GO:0022857; P:GO:0055085	F:transporter activity; C:integral component of membrane; F:transmembrane transporter activity; P:transmembrane transport
TRUE	[INTERPRO, BLASTED, MAPPED, GO-SLIM]	scaffold_000636F_transcript_id_W8BF78.1seq_length_1476	venom serine carboxypeptidase-like	1476	20	0	70.04	1	F:GO:0008233	F:peptidase activity			IPR001563 (PRINTS); IPR029058 (G3DSA:3.40.50.GENE3D); IPR001563 (PFAM); IPR029058 (G3DSA:3.40.50.GENE3D); PTHR11802:SF98 (PANTHER); IPR001563 (PANTHER); IPR018202 (PROSITE_PATTERNS); IPR029058 (SUPERFAMILY); TMhelix (TMHMM)	F:GO:0004185; P:GO:0006508	F:serine-type carboxypeptidase activity; P:proteolysis
TRUE	[INTERPRO, BLASTED]	scaffold_000097F_transcript_id_10898seq_length_3252	ankyrin-1-like isoform X1	3252	20	0	59.72						IPR002110 (PRINTS); IPR002110 (SMART); IPR036770 (G3DSA:1.25.40.GENE3D); IPR036770 (G3DSA:1.25.40.GENE3D); IPR036770 (G3DSA:1.25.40.GENE3D); PF13637 (PFAM); PF13857 (PFAM); IPR002110 (PFAM); IPR036770 (G3DSA:1.25.40.GENE3D); IPR036770 (G3DSA:1.25.40.GENE3D); IPR036770 (G3DSA:1.25.40.GENE3D); IPR036770 (G3DSA:1.25.40.GENE3D); IPR020683 (PFAM); PTHR44762 (PANTHER); IPR020683 (PROSITE_PROFILES); IPR…	F:GO:0005515	F:protein binding
TRUE	[INTERPRO, BLASTED]	scaffold_001171F_transcript_id_7242seq_length_1382	prostatic acid phosphatase-like isoform X1	1382	20	0	72.04						IPR029033 (G3DSA:3.40.50.GENE3D); IPR000560 (PFAM); PTHR11567:SF170 (PANTHER); PTHR11567 (PANTHER); IPR033379 (PROSITE_PATTERNS); TRANSMEMBRANE (PHOBIUS); CYTOPLASMIC_DOMAIN (PHOBIUS); NON_CYTOPLASMIC_DOMAIN (PHOBIUS); IPR000560 (CDD); IPR029033 (SUPERFAMILY); TMhelix (TMHMM)	no GO terms	no GO terms
TRUE	[INTERPRO, BLASTED, MAPPED]	scaffold_000167F_transcript_id_17654seq_length_1268	Dopamine N-acetyltransferase	1268	20	1.74518e-53	57.03	1	F:GO:0016740	F:transferase activity			IPR000182 (PFAM); G3DSA:3.40.630.30 (GENE3D); PTHR20905 (PANTHER); PTHR20905:SF25 (PANTHER); cd04301 (CDD); IPR016181 (SUPERFAMILY)	no GO terms	no GO terms
TRUE	[INTERPRO, BLASTED, MAPPED, GO-SLIM]	scaffold_000103F_transcript_id_6018seq_length_3621	urea carboxylase	3621	20	0	85.17	5	P:GO:0009056; F:GO:0016810; F:GO:0016829; P:GO:0034641; F:GO:0043167	P:catabolic process; F:hydrolase activity, acting on carbon-nitrogen (but not peptide) bonds; F:lyase activity; P:cellular nitrogen compound metabolic process; F:ion binding	EC:3.5.1.54	Allophanate hydrolase	IPR005482 (SMART); IPR003778 (SMART); IPR003833 (SMART); IPR005479 (PFAM); IPR003778 (TIGRFAM); IPR029000 (G3DSA:2.40.100.GENE3D); IPR014084 (TIGRFAM); G3DSA:3.30.470.130 (GENE3D); G3DSA:3.30.1360.40 (GENE3D); IPR005482 (PFAM); IPR029000 (G3DSA:2.40.100.GENE3D); IPR003833 (PFAM); IPR003778 (PFAM); IPR005481 (PFAM); G3DSA:2.40.50.100 (GENE3D); IPR000089 (PFAM); PTHR18866:SF91 (PANTHER); PTHR18866 …	F:GO:0005524; F:GO:0046872	F:ATP binding; F:metal ion binding
TRUE	[INTERPRO, BLASTED, MAPPED, GO-SLIM]	scaffold_000000F_transcript_id_26742seq_length_1280	peroxiredoxin-6-like	1280	20	6.83688e-144	78.71	3	C:GO:0005623; F:GO:0016491; P:GO:0042592	C:cell; F:oxidoreductase activity; P:homeostatic process	EC:1.11.1.15	Peroxiredoxin	G3DSA:3.40.30.10 (GENE3D); G3DSA:3.30.1020.10 (GENE3D); IPR019479 (PFAM); IPR000866 (PFAM); IPR024706 (PIRSF); PTHR43503 (PANTHER); PTHR43503:SF3 (PANTHER); IPR013766 (PROSITE_PROFILES); cd03016 (CDD); IPR036249 (SUPERFAMILY)	F:GO:0016209; F:GO:0016491; P:GO:0045454; F:GO:0051920; P:GO:0055114	F:antioxidant activity; F:oxidoreductase activity; P:cell redox homeostasis; F:peroxiredoxin activity; P:oxidation-reduction process
TRUE	[INTERPRO, BLASTED, MAPPED]	scaffold_000371F_transcript_id_11576seq_length_4602	probable poly(ADP-ribose) glycohydrolase 2 isoform X1	4602	20	0	67.53	2	F:GO:0004649; P:GO:0005975	F:poly(ADP-ribose) glycohydrolase activity; P:carbohydrate metabolic process			IPR007724 (PFAM); mobidb-lite (MOBIDB_LITE); PTHR12837:SF0 (PANTHER); IPR007724 (PANTHER)	F:GO:0004649; P:GO:0005975	F:poly(ADP-ribose) glycohydrolase activity; P:carbohydrate metabolic process
TRUE	[INTERPRO, BLASTED]	scaffold_000090F_transcript_id_19339seq_length_1917	protein FAM110B	1917	20	0	53.39						IPR025741 (PFAM); IPR025739 (PFAM); mobidb-lite (MOBIDB_LITE); mobidb-lite (MOBIDB_LITE); IPR025740 (PANTHER)	no GO terms	no GO terms
TRUE	[INTERPRO, BLASTED, MAPPED, GO-SLIM]	scaffold_000410F_transcript_id_14850seq_length_1635	cell cycle control protein 50A	1635	20	0	77.02	1	C:GO:0005575	C:cellular_component			IPR005045 (PFAM); IPR005045 (PIRSF); PTHR10926:SF46 (PANTHER); IPR005045 (PANTHER); TRANSMEMBRANE (PHOBIUS); CYTOPLASMIC_DOMAIN (PHOBIUS); NON_CYTOPLASMIC_DOMAIN (PHOBIUS); TRANSMEMBRANE (PHOBIUS); CYTOPLASMIC_DOMAIN (PHOBIUS); TMhelix (TMHMM); TMhelix (TMHMM)	C:GO:0016020	C:membrane
TRUE	[INTERPRO, BLASTED]	scaffold_000385F_transcript_id_11390seq_length_2407	facilitated trehalose transporter Tret1-like	2407	20	0	65.61						IPR005828 (PFAM); G3DSA:1.20.1250.20 (GENE3D); PTHR23500:SF3 (PANTHER); PTHR23500 (PANTHER); PTHR23500 (PANTHER); PTHR23500:SF3 (PANTHER); IPR005829 (PROSITE_PATTERNS); TRANSMEMBRANE (PHOBIUS); CYTOPLASMIC_DOMAIN (PHOBIUS); NON_CYTOPLASMIC_DOMAIN (PHOBIUS); TRANSMEMBRANE (PHOBIUS); NON_CYTOPLASMIC_DOMAIN (PHOBIUS); NON_CYTOPLASMIC_DOMAIN (PHOBIUS); TRANSMEMBRANE (PHOBIUS); TRANSMEMBRANE (PHOBIUS)…	F:GO:0005215; C:GO:0016021; F:GO:0022857; P:GO:0055085	F:transporter activity; C:integral component of membrane; F:transmembrane transporter activity; P:transmembrane transport
TRUE	[INTERPRO, BLASTED]	scaffold_000009F_transcript_id_26571seq_length_3141	craniofacial development protein 2-like	3141	20	0	71.56						Coil (COILS); IPR000477 (PFAM); IPR036691 (G3DSA:3.60.10.GENE3D); IPR005135 (PFAM); mobidb-lite (MOBIDB_LITE); mobidb-lite (MOBIDB_LITE); PTHR19446 (PANTHER); IPR000477 (PROSITE_PROFILES); cd01650 (CDD); cd09076 (CDD); IPR036691 (SUPERFAMILY); SSF56672 (SUPERFAMILY)	no GO terms	no GO terms
TRUE	[INTERPRO, BLASTED, MAPPED, GO-SLIM]	scaffold_000109F_transcript_id_5603seq_length_2460	proton-coupled amino acid transporter-like protein CG1139	2460	20	0	73.79	1	C:GO:0005575	C:cellular_component			Coil (COILS); IPR013057 (PFAM); PTHR22950:SF340 (PANTHER); PTHR22950 (PANTHER); CYTOPLASMIC_DOMAIN (PHOBIUS); CYTOPLASMIC_DOMAIN (PHOBIUS); TRANSMEMBRANE (PHOBIUS); TRANSMEMBRANE (PHOBIUS); CYTOPLASMIC_DOMAIN (PHOBIUS); TRANSMEMBRANE (PHOBIUS); TRANSMEMBRANE (PHOBIUS); NON_CYTOPLASMIC_DOMAIN (PHOBIUS); TRANSMEMBRANE (PHOBIUS); TRANSMEMBRANE (PHOBIUS); TRANSMEMBRANE (PHOBIUS); TRANSMEMBRANE (PHOBI…	no GO terms	no GO terms
TRUE	[INTERPRO, BLASTED]	scaffold_000210F_transcript_id_13196seq_length_1709	prostatic acid phosphatase-like isoform X1	1709	20	0	71.05						IPR029033 (G3DSA:3.40.50.GENE3D); IPR000560 (PFAM); PTHR11567 (PANTHER); PTHR11567:SF170 (PANTHER); IPR033379 (PROSITE_PATTERNS); CYTOPLASMIC_DOMAIN (PHOBIUS); NON_CYTOPLASMIC_DOMAIN (PHOBIUS); TRANSMEMBRANE (PHOBIUS); IPR000560 (CDD); IPR029033 (SUPERFAMILY); TMhelix (TMHMM)	no GO terms	no GO terms
TRUE	[INTERPRO, BLASTED, MAPPED, GO-SLIM]	scaffold_000094F_transcript_id_20075seq_length_4060	ER degradation-enhancing alpha-mannosidase-like protein 1	4060	20	0	80.96	6	C:GO:0005737; C:GO:0005783; C:GO:0005794; P:GO:0005975; F:GO:0016798; F:GO:0043167	C:cytoplasm; C:endoplasmic reticulum; C:Golgi apparatus; P:carbohydrate metabolic process; F:hydrolase activity, acting on glycosyl bonds; F:ion binding	EC:3.2.1.113; EC:3.2.1.24	Mannosyl-oligosaccharide 1,2-alpha-mannosidase; Alpha-mannosidase	IPR001382 (PRINTS); IPR012341 (G3DSA:1.50.10.GENE3D); IPR001382 (PFAM); PTHR11742:SF78 (PANTHER); PTHR11742 (PANTHER); SIGNAL_PEPTIDE (PHOBIUS); NON_CYTOPLASMIC_DOMAIN (PHOBIUS); SIGNAL_PEPTIDE_N_REGION (PHOBIUS); SIGNAL_PEPTIDE_H_REGION (PHOBIUS); SIGNAL_PEPTIDE_C_REGION (PHOBIUS); SignalP-noTM (SIGNALP_EUK); IPR036026 (SUPERFAMILY)	F:GO:0003824; F:GO:0004571; F:GO:0005509; C:GO:0016020	F:catalytic activity; F:mannosyl-oligosaccharide 1,2-alpha-mannosidase activity; F:calcium ion binding; C:membrane
TRUE	[INTERPRO, BLASTED, MAPPED]	scaffold_000189F_transcript_id_4916seq_length_1779-1	UDP-glucuronosyltransferase 2B20-like	1779	20	0	63.93	7	P:GO:0008152; F:GO:0015020; C:GO:0016020; C:GO:0016021; F:GO:0016740; F:GO:0016757; F:GO:0016758	P:metabolic process; F:glucuronosyltransferase activity; C:membrane; C:integral component of membrane; F:transferase activity; F:transferase activity, transferring glycosyl groups; F:transferase activity, transferring hexosyl groups			G3DSA:3.40.50.2000 (GENE3D); IPR002213 (PFAM); G3DSA:3.40.50.2000 (GENE3D); PTHR11926 (PANTHER); PTHR11926:SF151 (PANTHER); IPR035595 (PROSITE_PATTERNS); TRANSMEMBRANE (PHOBIUS); SIGNAL_PEPTIDE_N_REGION (PHOBIUS); SIGNAL_PEPTIDE_C_REGION (PHOBIUS); SIGNAL_PEPTIDE (PHOBIUS); SIGNAL_PEPTIDE_H_REGION (PHOBIUS); CYTOPLASMIC_DOMAIN (PHOBIUS); NON_CYTOPLASMIC_DOMAIN (PHOBIUS); cd03784 (CDD); SSF53756 (…	P:GO:0008152; F:GO:0016758	P:metabolic process; F:transferase activity, transferring hexosyl groups
TRUE	[INTERPRO, BLASTED]	scaffold_000038F_transcript_id_7684seq_length_1579	UDP-glucuronosyltransferase 2B18-like	1579	20	0	68.91						G3DSA:3.40.50.2000 (GENE3D); G3DSA:3.40.50.2000 (GENE3D); IPR002213 (PFAM); PTHR11926 (PANTHER); PTHR11926 (PANTHER); PTHR11926:SF151 (PANTHER); PTHR11926:SF151 (PANTHER); IPR035595 (PROSITE_PATTERNS); TRANSMEMBRANE (PHOBIUS); CYTOPLASMIC_DOMAIN (PHOBIUS); TRANSMEMBRANE (PHOBIUS); NON_CYTOPLASMIC_DOMAIN (PHOBIUS); CYTOPLASMIC_DOMAIN (PHOBIUS); TRANSMEMBRANE (PHOBIUS); NON_CYTOPLASMIC_DOMAIN (PHOB…	P:GO:0008152; F:GO:0016758	P:metabolic process; F:transferase activity, transferring hexosyl groups
TRUE	[INTERPRO, BLASTED, MAPPED, GO-SLIM]	scaffold_000037F_transcript_id_18717seq_length_2153	esterase FE4-like	2153	20	0	75.04	1	F:GO:0003674	F:molecular_function			IPR002018 (PFAM); IPR029058 (G3DSA:3.40.50.GENE3D); PTHR11559 (PANTHER); IPR019826 (PROSITE_PATTERNS); IPR029058 (SUPERFAMILY)	no GO terms	no GO terms
TRUE	[INTERPRO, BLASTED]	scaffold_000621F_transcript_id_4078seq_length_1630	PREDICTED: uncharacterized protein LOC109031934	1630	20	0	58.48						IPR015897 (SMART); IPR004119 (PFAM); PTHR11012 (PANTHER); IPR011009 (SUPERFAMILY)	no GO terms	no GO terms
TRUE	[INTERPRO, BLASTED, MAPPED, GO-SLIM]	scaffold_000106F_transcript_id_12353seq_length_1150	hypoxia-inducible factor 1-alpha inhibitor-like	1150	20	0	72.91	1	F:GO:0016491	F:oxidoreductase activity			IPR003347 (SMART); G3DSA:2.60.120.1660 (GENE3D); IPR027452 (G3DSA:1.10.287.GENE3D); PF13621 (PFAM); IPR027445 (PTHR12461:PANTHER); PTHR12461 (PANTHER); IPR003347 (PROSITE_PROFILES); SSF51197 (SUPERFAMILY)	no GO terms	no GO terms
TRUE	[INTERPRO, BLASTED]	scaffold_000140F_transcript_id_6884seq_length_2081	maltase A3-like	2081	20	0	68.92						IPR006047 (SMART); G3DSA:3.20.20.80 (GENE3D); G3DSA:3.90.400.10 (GENE3D); IPR006047 (PFAM); PTHR10357:SF177 (PANTHER); PTHR10357 (PANTHER); SIGNAL_PEPTIDE_H_REGION (PHOBIUS); NON_CYTOPLASMIC_DOMAIN (PHOBIUS); SIGNAL_PEPTIDE_N_REGION (PHOBIUS); SIGNAL_PEPTIDE (PHOBIUS); SIGNAL_PEPTIDE_C_REGION (PHOBIUS); SignalP-noTM (SIGNALP_EUK); IPR017853 (SUPERFAMILY)	F:GO:0003824; P:GO:0005975	F:catalytic activity; P:carbohydrate metabolic process
TRUE	[INTERPRO, BLASTED, MAPPED]	scaffold_000773F_transcript_id_W8BDJ5.1seq_length_384	PREDICTED: uncharacterized protein LOC109040110	384	20	5.93491e-62	65.02	2	C:GO:0016020; C:GO:0016021	C:membrane; C:integral component of membrane			IPR032073 (PFAM); mobidb-lite (MOBIDB_LITE); mobidb-lite (MOBIDB_LITE); PTHR21104 (PANTHER); SIGNAL_PEPTIDE_H_REGION (PHOBIUS); SIGNAL_PEPTIDE_C_REGION (PHOBIUS); SIGNAL_PEPTIDE_N_REGION (PHOBIUS); SIGNAL_PEPTIDE (PHOBIUS); NON_CYTOPLASMIC_DOMAIN (PHOBIUS)	no GO terms	no GO terms
TRUE	[INTERPRO, BLASTED]	scaffold_000038F_transcript_id_7738seq_length_2577	UDP-glucuronosyltransferase 2B18-like	2577	20	0	74.8						G3DSA:3.40.50.2000 (GENE3D); G3DSA:3.40.50.2000 (GENE3D); IPR002213 (PFAM); PTHR11926:SF151 (PANTHER); PTHR11926 (PANTHER); IPR035595 (PROSITE_PATTERNS); SIGNAL_PEPTIDE (PHOBIUS); SIGNAL_PEPTIDE_C_REGION (PHOBIUS); TRANSMEMBRANE (PHOBIUS); SIGNAL_PEPTIDE_H_REGION (PHOBIUS); NON_CYTOPLASMIC_DOMAIN (PHOBIUS); CYTOPLASMIC_DOMAIN (PHOBIUS); SIGNAL_PEPTIDE_N_REGION (PHOBIUS); cd03784 (CDD); SSF53756 (…	P:GO:0008152; F:GO:0016758	P:metabolic process; F:transferase activity, transferring hexosyl groups
TRUE	[INTERPRO, BLASTED, MAPPED, GO-SLIM]	scaffold_000035F_transcript_id_20753seq_length_2471	sodium/hydrogen exchanger 9B2-like isoform X1	2471	20	0	69.89	2	C:GO:0005575; P:GO:0055085	C:cellular_component; P:transmembrane transport			IPR006153 (PFAM); IPR038770 (G3DSA:1.20.1530.GENE3D); mobidb-lite (MOBIDB_LITE); mobidb-lite (MOBIDB_LITE); PTHR31102 (PANTHER); NON_CYTOPLASMIC_DOMAIN (PHOBIUS); NON_CYTOPLASMIC_DOMAIN (PHOBIUS); CYTOPLASMIC_DOMAIN (PHOBIUS); NON_CYTOPLASMIC_DOMAIN (PHOBIUS); TRANSMEMBRANE (PHOBIUS); TRANSMEMBRANE (PHOBIUS); CYTOPLASMIC_DOMAIN (PHOBIUS); NON_CYTOPLASMIC_DOMAIN (PHOBIUS); CYTOPLASMIC_DOMAIN (PHOB…	P:GO:0006812; F:GO:0015299; C:GO:0016021; P:GO:0055085	P:cation transport; F:solute:proton antiporter activity; C:integral component of membrane; P:transmembrane transport
TRUE	[INTERPRO, BLASTED, MAPPED, GO-SLIM]	scaffold_000299F_transcript_id_7947seq_length_1137	cathepsin B-like	1137	20	0	66.83	1	F:GO:0003674	F:molecular_function			IPR000668 (PRINTS); IPR000668 (SMART); IPR012599 (PFAM); IPR000668 (PFAM); G3DSA:3.90.70.10 (GENE3D); PTHR12411:SF540 (PANTHER); IPR013128 (PANTHER); IPR000169 (PROSITE_PATTERNS); IPR025660 (PROSITE_PATTERNS); SIGNAL_PEPTIDE_N_REGION (PHOBIUS); SIGNAL_PEPTIDE_H_REGION (PHOBIUS); SIGNAL_PEPTIDE_C_REGION (PHOBIUS); NON_CYTOPLASMIC_DOMAIN (PHOBIUS); SIGNAL_PEPTIDE (PHOBIUS); cd02620 (CDD); SignalP-T…	F:GO:0004197; P:GO:0006508; F:GO:0008234; P:GO:0050790	F:cysteine-type endopeptidase activity; P:proteolysis; F:cysteine-type peptidase activity; P:regulation of catalytic activity
TRUE	[INTERPRO, BLASTED]	scaffold_000000F_transcript_id_27021seq_length_1680	facilitated trehalose transporter Tret1-like	1680	20	0	82.2						G3DSA:1.20.1250.20 (GENE3D); IPR005828 (PFAM); mobidb-lite (MOBIDB_LITE); mobidb-lite (MOBIDB_LITE); PTHR23500:SF11 (PANTHER); PTHR23500 (PANTHER); CYTOPLASMIC_DOMAIN (PHOBIUS); CYTOPLASMIC_DOMAIN (PHOBIUS); TRANSMEMBRANE (PHOBIUS); NON_CYTOPLASMIC_DOMAIN (PHOBIUS); NON_CYTOPLASMIC_DOMAIN (PHOBIUS); TRANSMEMBRANE (PHOBIUS); TRANSMEMBRANE (PHOBIUS); TRANSMEMBRANE (PHOBIUS); NON_CYTOPLASMIC_DOMAIN …	C:GO:0016021; F:GO:0022857; P:GO:0055085	C:integral component of membrane; F:transmembrane transporter activity; P:transmembrane transport
TRUE	[INTERPRO, BLASTED]	scaffold_000067F_transcript_id_12394seq_length_2311	transcriptional coactivator YAP1-A isoform X1	2311	20	0	68.15						Coil (COILS); IPR001202 (SMART); G3DSA:2.20.70.10 (GENE3D); G3DSA:2.20.70.10 (GENE3D); IPR001202 (PFAM); mobidb-lite (MOBIDB_LITE); mobidb-lite (MOBIDB_LITE); PTHR17616 (PANTHER); IPR001202 (PROSITE_PATTERNS); IPR001202 (PROSITE_PATTERNS); IPR001202 (PROSITE_PROFILES); IPR001202 (PROSITE_PROFILES); IPR001202 (CDD); IPR001202 (CDD); IPR036020 (SUPERFAMILY); IPR036020 (SUPERFAMILY)	F:GO:0005515	F:protein binding
TRUE	[INTERPRO, BLASTED, MAPPED]	scaffold_000341F_transcript_id_2962seq_length_1083	gag-pol fusion protein	1083	20	9.09675e-57	50.91	9	F:GO:0003676; F:GO:0004190; F:GO:0004519; P:GO:0006508; F:GO:0008270; P:GO:0015074; C:GO:0016020; C:GO:0016021; P:GO:0090305	F:nucleic acid binding; F:aspartic-type endopeptidase activity; F:endonuclease activity; P:proteolysis; F:zinc ion binding; P:DNA integration; C:membrane; C:integral component of membrane; P:nucleic acid phosphodiester bond hydrolysis			G3DSA:3.10.10.10 (GENE3D); G3DSA:3.30.70.270 (GENE3D); G3DSA:3.30.70.270 (GENE3D); IPR000477 (PFAM); PTHR24559 (PANTHER); IPR000477 (PROSITE_PROFILES); cd01647 (CDD); SSF56672 (SUPERFAMILY)	no GO terms	no GO terms
TRUE	[INTERPRO, BLASTED, MAPPED, GO-SLIM]	scaffold_000443F_transcript_id_10959seq_length_825	bunched, isoform B	825	20	3.87878e-41	87.49	18	P:GO:0000003; F:GO:0003700; C:GO:0005634; C:GO:0005737; P:GO:0006950; P:GO:0007165; P:GO:0007568; P:GO:0008219; P:GO:0008283; P:GO:0009058; P:GO:0022607; P:GO:0030154; C:GO:0032991; P:GO:0034641; P:GO:0040007; P:GO:0042592; P:GO:0048646; P:GO:0048870	P:reproduction; F:DNA-binding transcription factor activity; C:nucleus; C:cytoplasm; P:response to stress; P:signal transduction; P:aging; P:cell death; P:cell proliferation; P:biosynthetic process; P:cellular component assembly; P:cell differentiation; C:protein-containing complex; P:cellular nitrogen compound metabolic process; P:growth; P:homeostatic process; P:anatomical structure formation i…			Coil (COILS); IPR000580 (PFAM); G3DSA:1.20.5.490 (GENE3D); mobidb-lite (MOBIDB_LITE); IPR000580 (PANTHER); IPR000580 (PROSITE_PATTERNS); IPR000580 (PRODOM); SSF58026 (SUPERFAMILY)	F:GO:0003700; P:GO:0006355	F:DNA-binding transcription factor activity; P:regulation of transcription, DNA-templated
TRUE	[INTERPRO, BLASTED, MAPPED]	scaffold_000851F_transcript_id_1818seq_length_1896	gamma-glutamyl hydrolase-like	1896	20	0	61.96	6	P:GO:0006508; F:GO:0008242; C:GO:0016020; C:GO:0016021; F:GO:0016787; F:GO:0034722	P:proteolysis; F:omega peptidase activity; C:membrane; C:integral component of membrane; F:hydrolase activity; F:gamma-glutamyl-peptidase activity			IPR011697 (PFAM); IPR029062 (G3DSA:3.40.50.GENE3D); IPR015527 (PANTHER); SIGNAL_PEPTIDE_C_REGION (PHOBIUS); SIGNAL_PEPTIDE (PHOBIUS); NON_CYTOPLASMIC_DOMAIN (PHOBIUS); SIGNAL_PEPTIDE_N_REGION (PHOBIUS); SIGNAL_PEPTIDE_H_REGION (PHOBIUS); IPR015527 (PROSITE_PROFILES); SignalP-noTM (SIGNALP_EUK); IPR029062 (SUPERFAMILY)	F:GO:0008242; F:GO:0016787	F:omega peptidase activity; F:hydrolase activity
TRUE	[INTERPRO, BLASTED, MAPPED]	scaffold_000457F_transcript_id_4190seq_length_1932	protein amalgam-like isoform X2	1932	20	0	53.99	4	C:GO:0005918; C:GO:0016020; C:GO:0016021; P:GO:0019991	C:septate junction; C:membrane; C:integral component of membrane; P:septate junction assembly			IPR003598 (SMART); IPR003599 (SMART); IPR013106 (SMART); IPR013098 (PFAM); IPR013783 (G3DSA:2.60.40.GENE3D); IPR013783 (G3DSA:2.60.40.GENE3D); IPR013106 (PFAM); IPR013783 (G3DSA:2.60.40.GENE3D); PIRSF000615 (PIRSF); IPR013783 (G3DSA:2.60.40.GENE3D); PF13927 (PFAM); mobidb-lite (MOBIDB_LITE); mobidb-lite (MOBIDB_LITE); PTHR45080 (PANTHER); SIGNAL_PEPTIDE_C_REGION (PHOBIUS); SIGNAL_PEPTIDE_N_REGION…	F:GO:0005515	F:protein binding
TRUE	[INTERPRO, BLASTED]	scaffold_000006F_transcript_id_25914seq_length_1414	testicular acid phosphatase homolog	1414	20	0	68.85						IPR029033 (G3DSA:3.40.50.GENE3D); IPR000560 (PFAM); PTHR11567 (PANTHER); PTHR11567:SF170 (PANTHER); IPR033379 (PROSITE_PATTERNS); NON_CYTOPLASMIC_DOMAIN (PHOBIUS); SIGNAL_PEPTIDE_H_REGION (PHOBIUS); SIGNAL_PEPTIDE (PHOBIUS); SIGNAL_PEPTIDE_C_REGION (PHOBIUS); SIGNAL_PEPTIDE_N_REGION (PHOBIUS); IPR000560 (CDD); SignalP-noTM (SIGNALP_EUK); IPR029033 (SUPERFAMILY)	no GO terms	no GO terms
TRUE	[INTERPRO, BLASTED, MAPPED]	scaffold_000784F_transcript_id_3556seq_length_2968-2	cytochrome b5-related protein-like	2968	20	0	66.02	7	P:GO:0006629; C:GO:0016020; C:GO:0016021; F:GO:0016491; F:GO:0020037; F:GO:0046872; P:GO:0055114	P:lipid metabolic process; C:membrane; C:integral component of membrane; F:oxidoreductase activity; F:heme binding; F:metal ion binding; P:oxidation-reduction process			IPR001199 (SMART); IPR005804 (PFAM); IPR036400 (G3DSA:3.10.120.GENE3D); IPR001199 (PFAM); PTHR16740 (PANTHER); TRANSMEMBRANE (PHOBIUS); CYTOPLASMIC_DOMAIN (PHOBIUS); TRANSMEMBRANE (PHOBIUS); CYTOPLASMIC_DOMAIN (PHOBIUS); CYTOPLASMIC_DOMAIN (PHOBIUS); TRANSMEMBRANE (PHOBIUS); NON_CYTOPLASMIC_DOMAIN (PHOBIUS); TRANSMEMBRANE (PHOBIUS); TRANSMEMBRANE (PHOBIUS); NON_CYTOPLASMIC_DOMAIN (PHOBIUS); CYTOP…	P:GO:0006629	P:lipid metabolic process
TRUE	[INTERPRO, BLASTED]	scaffold_000766F_transcript_id_550seq_length_1703	facilitated trehalose transporter Tret1-like	1703	20	0	56.26						IPR005828 (PFAM); G3DSA:1.20.1250.20 (GENE3D); PTHR23500 (PANTHER); PTHR23500:SF11 (PANTHER); TRANSMEMBRANE (PHOBIUS); TRANSMEMBRANE (PHOBIUS); TRANSMEMBRANE (PHOBIUS); NON_CYTOPLASMIC_DOMAIN (PHOBIUS); TRANSMEMBRANE (PHOBIUS); CYTOPLASMIC_DOMAIN (PHOBIUS); NON_CYTOPLASMIC_DOMAIN (PHOBIUS); NON_CYTOPLASMIC_DOMAIN (PHOBIUS); CYTOPLASMIC_DOMAIN (PHOBIUS); TRANSMEMBRANE (PHOBIUS); CYTOPLASMIC_DOMAIN…	C:GO:0016021; F:GO:0022857; P:GO:0055085	C:integral component of membrane; F:transmembrane transporter activity; P:transmembrane transport
TRUE	[INTERPRO, BLASTED, MAPPED]	scaffold_000053F_transcript_id_15829seq_length_1637	zinc finger protein 691	1637	20	1.87453e-79	45.54	1	F:GO:0003676	F:nucleic acid binding			IPR013087 (SMART); G3DSA:3.30.160.60 (GENE3D); G3DSA:3.30.160.60 (GENE3D); PF00096 (PFAM); mobidb-lite (MOBIDB_LITE); mobidb-lite (MOBIDB_LITE); PTHR24376 (PANTHER); PTHR24376:SF57 (PANTHER); PTHR24376:SF57 (PANTHER); PTHR24376 (PANTHER); IPR013087 (PROSITE_PATTERNS); IPR013087 (PROSITE_PATTERNS); IPR013087 (PROSITE_PATTERNS); IPR013087 (PROSITE_PATTERNS); IPR013087 (PROSITE_PATTERNS); IPR013087 …	F:GO:0003676	F:nucleic acid binding
TRUE	[INTERPRO, BLASTED, MAPPED, GO-SLIM]	scaffold_000035F_transcript_id_20720seq_length_3762	uricase	3762	20	0	71.43	1	P:GO:0008150	P:biological_process			IPR002042 (PRINTS); IPR002042 (PFAM); IPR002042 (TIGRFAM); G3DSA:3.10.270.10 (GENE3D); IPR002042 (PIRSF); PTHR42874 (PANTHER); IPR019842 (PROSITE_PATTERNS); PD003367 (PRODOM); SSF55620 (SUPERFAMILY); SSF55620 (SUPERFAMILY)	F:GO:0004846; P:GO:0006144; P:GO:0055114	F:urate oxidase activity; P:purine nucleobase metabolic process; P:oxidation-reduction process
TRUE	[INTERPRO, BLASTED]	scaffold_000079F_transcript_id_14902seq_length_2783	UDP-glucuronosyltransferase 2B7-like isoform X3	2783	20	0	78.41						IPR002213 (PFAM); G3DSA:3.40.50.2000 (GENE3D); PTHR11926 (PANTHER); PTHR11926:SF151 (PANTHER); SIGNAL_PEPTIDE_H_REGION (PHOBIUS); SIGNAL_PEPTIDE_C_REGION (PHOBIUS); TRANSMEMBRANE (PHOBIUS); NON_CYTOPLASMIC_DOMAIN (PHOBIUS); CYTOPLASMIC_DOMAIN (PHOBIUS); SIGNAL_PEPTIDE_N_REGION (PHOBIUS); SIGNAL_PEPTIDE (PHOBIUS); cd03784 (CDD); SignalP-TM (SIGNALP_EUK); SignalP-TM (SIGNALP_GRAM_POSITIVE); SSF5375…	P:GO:0008152; F:GO:0016758	P:metabolic process; F:transferase activity, transferring hexosyl groups
TRUE	[INTERPRO, BLASTED, MAPPED]	scaffold_000116F_transcript_id_18428seq_length_1678-1	ester hydrolase C11orf54 homolog	1678	20	0	74.51	2	C:GO:0005634; F:GO:0016787	C:nucleus; F:hydrolase activity			IPR015021 (SMART); IPR015021 (PFAM); IPR015021 (PANTHER); SSF117856 (SUPERFAMILY)	C:GO:0005634	C:nucleus
TRUE	[INTERPRO, BLASTED, MAPPED]	scaffold_000144F_transcript_id_12125seq_length_2391	facilitated trehalose transporter Tret1-like	2391	20	0	63.8	6	F:GO:0005215; P:GO:0008643; C:GO:0016020; C:GO:0016021; F:GO:0022857; P:GO:0055085	F:transporter activity; P:carbohydrate transport; C:membrane; C:integral component of membrane; F:transmembrane transporter activity; P:transmembrane transport			IPR005828 (PFAM); G3DSA:1.20.1250.20 (GENE3D); PTHR23500 (PANTHER); PTHR23500:SF37 (PANTHER); IPR005829 (PROSITE_PATTERNS); IPR005829 (PROSITE_PATTERNS); TRANSMEMBRANE (PHOBIUS); SIGNAL_PEPTIDE_H_REGION (PHOBIUS); SIGNAL_PEPTIDE (PHOBIUS); TRANSMEMBRANE (PHOBIUS); SIGNAL_PEPTIDE_C_REGION (PHOBIUS); TRANSMEMBRANE (PHOBIUS); CYTOPLASMIC_DOMAIN (PHOBIUS); NON_CYTOPLASMIC_DOMAIN (PHOBIUS); TRANSMEMBR…	F:GO:0005215; C:GO:0016021; F:GO:0022857; P:GO:0055085	F:transporter activity; C:integral component of membrane; F:transmembrane transporter activity; P:transmembrane transport
TRUE	[INTERPRO, BLASTED]	scaffold_000199F_transcript_id_10517seq_length_2398	maltase A3-like	2398	20	0	74.54						IPR006047 (SMART); G3DSA:3.20.20.80 (GENE3D); IPR006047 (PFAM); IPR013780 (G3DSA:2.60.40.GENE3D); G3DSA:3.90.400.10 (GENE3D); PTHR10357 (PANTHER); PTHR10357:SF177 (PANTHER); TRANSMEMBRANE (PHOBIUS); SIGNAL_PEPTIDE_N_REGION (PHOBIUS); TRANSMEMBRANE (PHOBIUS); CYTOPLASMIC_DOMAIN (PHOBIUS); NON_CYTOPLASMIC_DOMAIN (PHOBIUS); SIGNAL_PEPTIDE_H_REGION (PHOBIUS); NON_CYTOPLASMIC_DOMAIN (PHOBIUS); SIGNAL_…	F:GO:0003824; P:GO:0005975	F:catalytic activity; P:carbohydrate metabolic process
TRUE	[INTERPRO, BLASTED, MAPPED, GO-SLIM]	scaffold_000067F_transcript_id_13445seq_length_1607	iodotyrosine dehalogenase 1	1607	20	0	76.18	2	C:GO:0005575; F:GO:0016491	C:cellular_component; F:oxidoreductase activity			IPR000415 (G3DSA:3.40.109.GENE3D); IPR029479 (PFAM); PTHR23026:SF90 (PANTHER); PTHR23026 (PANTHER); NON_CYTOPLASMIC_DOMAIN (PHOBIUS); CYTOPLASMIC_DOMAIN (PHOBIUS); TRANSMEMBRANE (PHOBIUS); cd02144 (CDD); IPR000415 (SUPERFAMILY)	F:GO:0016491	F:oxidoreductase activity
TRUE	[INTERPRO, BLASTED]	scaffold_000141F_transcript_id_10567seq_length_1202	PREDICTED: uncharacterized protein LOC109029718	1202	20	2.45893e-119	78.03						PTHR38332:SF1 (PANTHER); PTHR38332 (PANTHER); SIGNAL_PEPTIDE_C_REGION (PHOBIUS); SIGNAL_PEPTIDE (PHOBIUS); NON_CYTOPLASMIC_DOMAIN (PHOBIUS); SIGNAL_PEPTIDE_H_REGION (PHOBIUS); SIGNAL_PEPTIDE_N_REGION (PHOBIUS); SignalP-TM (SIGNALP_GRAM_POSITIVE); SignalP-noTM (SIGNALP_EUK)	no GO terms	no GO terms
TRUE	[INTERPRO, BLASTED, MAPPED, GO-SLIM]	scaffold_000012F_transcript_id_22025seq_length_3231	cleft lip and palate transmembrane protein 1 homolog	3231	20	0	79.35	1	C:GO:0005575	C:cellular_component			IPR008429 (PFAM); mobidb-lite (MOBIDB_LITE); mobidb-lite (MOBIDB_LITE); PTHR21347:SF7 (PANTHER); IPR008429 (PANTHER); TRANSMEMBRANE (PHOBIUS); CYTOPLASMIC_DOMAIN (PHOBIUS); NON_CYTOPLASMIC_DOMAIN (PHOBIUS); TRANSMEMBRANE (PHOBIUS); NON_CYTOPLASMIC_DOMAIN (PHOBIUS); CYTOPLASMIC_DOMAIN (PHOBIUS); TRANSMEMBRANE (PHOBIUS); NON_CYTOPLASMIC_DOMAIN (PHOBIUS); TRANSMEMBRANE (PHOBIUS); TRANSMEMBRANE (PHOB…	C:GO:0016021	C:integral component of membrane
TRUE	[INTERPRO, BLASTED, MAPPED, GO-SLIM]	scaffold_000114F_transcript_id_14827seq_length_1143	ubiquitin-conjugating enzyme E2 J2	1143	20	0	77.02	1	C:GO:0005575	C:cellular_component			SM00212 (SMART); IPR000608 (PFAM); IPR016135 (G3DSA:3.10.110.GENE3D); mobidb-lite (MOBIDB_LITE); PTHR43972 (PANTHER); PTHR43972:SF1 (PANTHER); CYTOPLASMIC_DOMAIN (PHOBIUS); NON_CYTOPLASMIC_DOMAIN (PHOBIUS); TRANSMEMBRANE (PHOBIUS); IPR000608 (PROSITE_PROFILES); IPR000608 (CDD); IPR016135 (SUPERFAMILY); TMhelix (TMHMM)	no GO terms	no GO terms
TRUE	[INTERPRO, BLASTED, MAPPED, GO-SLIM]	scaffold_000616F_transcript_id_9297seq_length_2551	methionyl-tRNA formyltransferase, mitochondrial	2551	20	0	64.79	1	F:GO:0003674	F:molecular_function			G3DSA:3.40.50.12230 (GENE3D); IPR002376 (PFAM); mobidb-lite (MOBIDB_LITE); mobidb-lite (MOBIDB_LITE); mobidb-lite (MOBIDB_LITE); PTHR11138 (PANTHER); PTHR11138:SF0 (PANTHER); NON_CYTOPLASMIC_DOMAIN (PHOBIUS); CYTOPLASMIC_DOMAIN (PHOBIUS); TRANSMEMBRANE (PHOBIUS); cd08646 (CDD); IPR036477 (SUPERFAMILY)	P:GO:0009058; F:GO:0016742	P:biosynthetic process; F:hydroxymethyl-, formyl- and related transferase activity
TRUE	[INTERPRO, BLASTED, MAPPED, GO-SLIM]	scaffold_000069F_transcript_id_9261seq_length_1338	mediator of RNA polymerase II transcription subunit 8	1338	20	3.07042e-146	74.08	3	C:GO:0005634; P:GO:0009058; P:GO:0034641	C:nucleus; P:biosynthetic process; P:cellular nitrogen compound metabolic process			IPR019364 (PFAM); mobidb-lite (MOBIDB_LITE); mobidb-lite (MOBIDB_LITE); IPR019364 (PANTHER)	F:GO:0003712; P:GO:0006357; C:GO:0016592	F:transcription coregulator activity; P:regulation of transcription by RNA polymerase II; C:mediator complex
TRUE	[INTERPRO, BLASTED, MAPPED, GO-SLIM]	scaffold_000285F_transcript_id_11453seq_length_1620	N-acetylgalactosamine kinase	1620	20	0	67.79	1	F:GO:0016301	F:kinase activity			PR00959 (PRINTS); IPR000705 (PRINTS); IPR006204 (PFAM); G3DSA:3.30.70.3170 (GENE3D); IPR006206 (PIRSF); IPR014721 (G3DSA:3.30.230.GENE3D); IPR000705 (TIGRFAM); G3DSA:1.20.1440.340 (GENE3D); IPR013750 (PFAM); IPR019539 (PFAM); PTHR10457 (PANTHER); PTHR10457:SF7 (PANTHER); IPR006203 (PROSITE_PATTERNS); IPR019741 (PROSITE_PATTERNS); IPR020568 (SUPERFAMILY); IPR036554 (SUPERFAMILY)	F:GO:0004335; F:GO:0005524; F:GO:0005534; C:GO:0005737; P:GO:0006012; P:GO:0008152; F:GO:0016301; F:GO:0016773; P:GO:0046835	F:galactokinase activity; F:ATP binding; F:galactose binding; C:cytoplasm; P:galactose metabolic process; P:metabolic process; F:kinase activity; F:phosphotransferase activity, alcohol group as acceptor; P:carbohydrate phosphorylation
TRUE	[INTERPRO, BLASTED]	scaffold_000000F_transcript_id_26487seq_length_1814	facilitated trehalose transporter Tret1-like	1814	20	0	63.52						Coil (COILS); IPR003663 (PRINTS); G3DSA:1.20.1250.20 (GENE3D); IPR005828 (PFAM); PTHR23500:SF11 (PANTHER); PTHR23500 (PANTHER); CYTOPLASMIC_DOMAIN (PHOBIUS); CYTOPLASMIC_DOMAIN (PHOBIUS); NON_CYTOPLASMIC_DOMAIN (PHOBIUS); TRANSMEMBRANE (PHOBIUS); NON_CYTOPLASMIC_DOMAIN (PHOBIUS); NON_CYTOPLASMIC_DOMAIN (PHOBIUS); CYTOPLASMIC_DOMAIN (PHOBIUS); TRANSMEMBRANE (PHOBIUS); TRANSMEMBRANE (PHOBIUS); NON_…	C:GO:0016020; C:GO:0016021; F:GO:0022857; P:GO:0055085	C:membrane; C:integral component of membrane; F:transmembrane transporter activity; P:transmembrane transport
[truncated: 925 more rows]

## Sheet: Dataset S1C
Dataset S1C: Fischer's exact enrichment test
Tags	GO ID	GO Name	GO Category	FDR	P-Value	Nr Test	Nr Reference	Non Annot Test	Non Annot Reference
[truncated: 51 more rows]
