# Supplementary material for: In silico prediction of candidate gene targets for the management of African cassava whitefly (Bemisia tabaci, SSA1-SG1), a key vector of viruses causing cassava brown streak disease
Source: PeerJ. 2024 Feb 23;12:e16949. doi: 10.7717/peerj.16949 (PMC10896082; doi:10.7717/peerj.16949)
Supplement: Supplemental Information 4 [file peerj-12-16949-s004.xlsx]

## Sheet: Reaction List
Abbreviation	Description	Reaction	GPR	Genes	Proteins	Subsystem	Reversible	Lower bound	Upper bound	Objective	Confidence Score	EC Number	Notes	References
ACOTA	acetylornithine transaminase	acg5sa[c] + glu-L[c] => acorn[c] + akg[c]	fig|235572.25.peg.142	fig|235572.25.peg.142		Arginine Biosynthesis I	0	0	1000	0	2	2.6.1.11	argD
CBPS	carbamoyl-phosphate synthase (glutamine-hydrolysing)	2 atp[c] + gln-L[c] + h2o[c] + hco3[c] => 2 adp[c] + cbp[c] + glu-L[c] + 2 h[c] + pi[c]	fig|235572.25.peg.197 and fig|235572.25.peg.198	fig|235572.25.peg.197 fig|235572.25.peg.198		Arginine Biosynthesis	0	0	1000	0	2	6.3.5.5	carAB
OCBT	ornithine carbamoyltransferase	cbp[c] + orn[c] => citr-L[c] + h[c] + pi[c]	fig|235572.25.peg.55	fig|235572.25.peg.55		Arginine Biosynthesis	0	0	1000	0	2	2.1.3.3	argF
ARGSS	argininosuccinate synthase	asp-L[c] + atp[c] + citr-L[c] => amp[c] + argsuc[c] + h[c] + ppi[c]	fig|235572.25.peg.137	fig|235572.25.peg.137		Arginine Biosynthesis	0	0	1000	0	2	6.3.4.5	argG
METS	methionine synthase (cobalamin-independent)	5mthf[c] + hcys-L[c] => h[c] + met-L[c] + thf[c]	fig|235572.25.peg.211	fig|235572.25.peg.211		Methionine Biosynthesis	0	0	1000	0	2	2.1.1.14	metE
PRPPS	phosphoribosylpyrophosphate synthetase	atp[c] + r5p[c] => amp[c] + h[c] + prpp[c]	fig|235572.25.peg.126	fig|235572.25.peg.126		Histidine Biosynthesis	0	0	1000	0	2	2.7.6.1	prs
ATPPRT	ATP phosphoribosyltransferase	atp[c] + prpp[c] => ppi[c] + prbatp[c]	fig|235572.25.peg.41 and fig|235572.25.peg.118	fig|235572.25.peg.41 fig|235572.25.peg.118		Histidine Biosynthesis	0	0	1000	0	2	2.4.2.17	hisGZ
PRATPP	phosphoribosyl-ATP pyrophosphatase	h2o[c] + prbatp[c] => h[c] + ppi[c] + prbamp[c]	fig|235572.25.peg.212	fig|235572.25.peg.212		Histidine Biosynthesis	0	0	1000	0	2	3.6.1.31	hisI
PRAMPC	phosphoribosyl-AMP cyclohydrolase	h2o[c] + prbamp[c] => prfp[c]	fig|235572.25.peg.240	fig|235572.25.peg.240		Histidine Biosynthesis	0	0	1000	0	2	3.5.4.19	hisI
PRMICI	1-(5-phosphoribosyl)-5-[(5-phosphoribosylamino)methylideneamino)imidazole-4-carboxamide isomerase	prfp[c] => prlp[c]	fig|235572.25.peg.106	fig|235572.25.peg.106		Histidine Biosynthesis	0	0	1000	0	2	5.3.1.16	hisA
IG3PS	Imidazole-glycerol-3-phosphate synthase	gln-L[c] + prlp[c] => aicar[c] + eig3p[c] + glu-L[c] + h[c]	fig|235572.25.peg.104 and fig|235572.25.peg.107	fig|235572.25.peg.104 fig|235572.25.peg.107		Histidine Biosynthesis	0	0	1000	0	2	4.3.2.10	hisHF
IGPDH	imidazoleglycerol-phosphate dehydratase	eig3p[c] => h2o[c] + imacp[c]	fig|235572.25.peg.103	fig|235572.25.peg.103		Histidine Biosynthesis	0	0	1000	0	2	4.2.1.19	hisB
HSTPT	histidinol-phosphate transaminase	glu-L[c] + imacp[c] => akg[c] + hisp[c]	fig|235572.25.peg.108	fig|235572.25.peg.108		Histidine Biosynthesis	0	0	1000	0	2	2.6.1.9	hisC
ASPK	aspartate kinase	asp-L[c] + atp[c] => 4pasp[c] + adp[c]	fig|235572.25.peg.151 or fig|235572.25.peg.94	fig|235572.25.peg.151 fig|235572.25.peg.94		Lysine Biosynthesis	0	0	1000	0	2	2.7.2.4	lysC thrA
ASAD	aspartate-semialdehyde dehydrogenase	4pasp[c] + h[c] + nadph[c] => aspsa[c] + nadp[c] + pi[c]	fig|235572.25.peg.52	fig|235572.25.peg.52		Lysine Biosynthesis	0	0	1000	0	2	1.2.1.11	asd
DHDPS	4-hydroxy-tetrahydrodipicolinate synthase	aspsa[c] + pyr[c] => 23dhdp[c] + h[c] + 2 h2o[c]	fig|235572.25.peg.236	fig|235572.25.peg.236		Lysine Biosynthesis	0	0	1000	0	2	4.3.3.7	dapA
THDPS	tetrahydrodipicolinate succinylase	h2o[c] + succoa[c] + thdp[c] => coa[c] + sl2a6o[c]	fig|235572.25.peg.203	fig|235572.25.peg.203		Lysine Biosynthesis	0	0	1000	0	2	2.3.1.117	dapD
SDPTA	succinyldiaminopimelate transaminase	glu-L[c] + sl2a6o[c] <=> akg[c] + sl26da[c]	fig|235572.25.peg.142	fig|235572.25.peg.142		Lysine Biosynthesis	1	-1000	1000	0	2	2.6.1.17	argD
SDPDS	succinyl-diaminopimelate desuccinylase	h2o[c] + sl26da[c] => 26dap-LL[c] + succ[c]	fig|235572.25.peg.202	fig|235572.25.peg.202		Lysine Biosynthesis	0	0	1000	0	2	3.5.1.18	dapE
HSD	homoserine dehydrogenase (NADPH)	aspsa[c] + h[c] + nadph[c] <=> hom-L[c] + nadp[c]	fig|235572.25.peg.94	fig|235572.25.peg.94		Threonine Biosynthesis	1	-1000	1000	0	2	1.1.1.3	thrA
HSK	homoserine kinase	atp[c] + hom-L[c] => adp[c] + h[c] + phom[c]	fig|235572.25.peg.109	fig|235572.25.peg.109		Threonine Biosynthesis	0	0	1000	0	2	2.7.1.39	thrB
THRS	threonine synthase	h2o[c] + phom[c] => pi[c] + thr-L[c]	fig|235572.25.peg.93	fig|235572.25.peg.93		Threonine Biosynthesis	0	0	1000	0	2	4.2.3.1	thrC
DDPA	3-deoxy-D-arabino-heptulosonate 7-phosphate synthetase	e4p[c] + h2o[c] + pep[c] => 2dda7p[c] + pi[c]	fig|235572.25.peg.210	fig|235572.25.peg.210		Chorismate Biosynthesis	0	0	1000	0	2	2.5.1.54	aroFGH
DHQS	3-dehydroquinate synthase	2dda7p[c] => 3dhq[c] + pi[c]	fig|235572.25.peg.217	fig|235572.25.peg.217		Chorismate Biosynthesis	0	0	1000	0	2	4.2.3.4	aroB
DHQTi	3-dehydroquinate dehydratase, irreversible	3dhq[c] => 3dhsk[c] + h2o[c]	fig|235572.25.peg.181	fig|235572.25.peg.181		Chorismate Biosynthesis	0	0	1000	0	2	4.2.1.10	aroQ
SHK3Dr	shikimate dehydrogenase	3dhsk[c] + h[c] + nadph[c] <=> nadp[c] + skm[c]	fig|235572.25.peg.169	fig|235572.25.peg.169		Chorismate Biosynthesis	1	-1000	1000	0	2	1.1.1.25	aroE
SHKK	shikimate kinase	atp[c] + skm[c] => adp[c] + h[c] + skm5p[c]	fig|235572.25.peg.216	fig|235572.25.peg.216		Chorismate Biosynthesis	0	0	1000	0	2	2.7.1.71	aroK
PSCVT	3-phosphoshikimate 1-carboxyvinyltransferase	pep[c] + skm5p[c] <=> 3psme[c] + pi[c]	fig|235572.25.peg.234	fig|235572.25.peg.234		Chorismate Biosynthesis	1	-1000	1000	0	2	2.5.1.19	aroA
CHORS	chorismate synthase	3psme[c] => chor[c] + pi[c]	fig|235572.25.peg.227	fig|235572.25.peg.227		Chorismate Biosynthesis	0	0	1000	0	2	4.2.3.5	aroC
ANS	anthranilate synthase	chor[c] + gln-L[c] => anth[c] + glu-L[c] + h[c] + pyr[c]	(fig|235572.25.peg.132 and fig|235572.25.peg.133)	fig|235572.25.peg.132 fig|235572.25.peg.133		Tryptophan Biosynthesis	0	0	1000	0	2	4.1.3.27	trpE
ANPRT	anthranilate phosphoribosyltransferase	anth[c] + prpp[c] => ppi[c] + pran[c]	fig|235572.25.peg.131	fig|235572.25.peg.131		Tryptophan Biosynthesis	0	0	1000	0	2	2.4.2.18	trpD
PRAIi	phosphoribosylanthranilate isomerase (irreversible)	pran[c] => 2cpr5p[c]	fig|235572.25.peg.50	fig|235572.25.peg.50		Tryptophan Biosynthesis	0	0	1000	0	2	5.3.1.24	trpF
IGPS	indole-3-glycerol-phosphate synthase	2cpr5p[c] + h[c] => 3ig3p[c] + co2[c] + h2o[c]	fig|235572.25.peg.130	fig|235572.25.peg.130		Tryptophan Biosynthesis	0	0	1000	0	2	4.1.1.48	trpC
TRPS3	tryptophan synthase (indoleglycerol phosphate)	3ig3p[c] => g3p[c] + indole[c]	(fig|235572.25.peg.146 and fig|235572.25.peg.147)	fig|235572.25.peg.146 fig|235572.25.peg.147		Tryptophan Biosynthesis	0	0	1000	0	2	4.2.1.20	trpAB
TRPS1	tryptophan synthase (indoleglycerol phosphate)	3ig3p[c] + ser-L[c] => g3p[c] + h2o[c] + trp-L[c]	(fig|235572.25.peg.146 and fig|235572.25.peg.147)	fig|235572.25.peg.146 fig|235572.25.peg.147		Tryptophan Biosynthesis	0	0	1000	0	2	4.2.1.20	trpAB
TRPS2	tryptophan synthase (indole)	indole[c] + ser-L[c] => h2o[c] + trp-L[c]	(fig|235572.25.peg.146 and fig|235572.25.peg.147)	fig|235572.25.peg.146 fig|235572.25.peg.147		Tryptophan Biosynthesis	0	0	1000	0	2	4.2.1.20	trpAB
CHORM	chorismate mutase	chor[c] => pphn[c]	fig|235572.25.peg.233	fig|235572.25.peg.233		Phenylalanine Biosynthesis	0	0	1000	0	2	5.4.99.5	trpAB
PPNDH	prephenate dehydratase	h[c] + pphn[c] => co2[c] + h2o[c] + phpyr[c]	fig|235572.25.peg.233	fig|235572.25.peg.233		Phenylalanine Biosynthesis	0	0	1000	0	2	4.2.1.51	trpAB
THRD_L	L-threonine deaminase	thr-L[c] => 2obut[c] + nh4[c]	fig|235572.25.peg.65	fig|235572.25.peg.65		Isoleucine Biosynthesis	0	0	1000	0	2	4.3.1.19	ilvI
ACHBS	2-aceto-2-hydroxybutanoate synthase	2obut[c] + h[c] + pyr[c] => 2ahbut[c] + co2[c]	(fig|235572.25.peg.99 and fig|235572.25.peg.100)	fig|235572.25.peg.99 fig|235572.25.peg.100		Isoleucine Biosynthesis	0	0	1000	0	2	2.2.1.6	ilvH
KARA2	ketol-acid reductoisomerase (2-Acetolactate)	2ahbut[c] + h[c] + nadph[c] <=> 23dhmp[c] + nadp[c]	fig|235572.25.peg.98	fig|235572.25.peg.98		Isoleucine Biosynthesis	1	-1000	1000	0	2	1.1.1.86	ilvC
DHAD2	Dihydroxy-acid dehydratase (2,3-dihydroxy-3-methylpentanoate)	23dhmp[c] => 3mop[c] + h2o[c]	fig|235572.25.peg.44	fig|235572.25.peg.44		Isoleucine Biosynthesis	0	0	1000	0	2	4.2.1.9	ilvD
ACLS	acetolactate synthase	h[c] + 2 pyr[c] => alac-S[c] + co2[c]	(fig|235572.25.peg.99 and fig|235572.25.peg.100)	fig|235572.25.peg.99 fig|235572.25.peg.100		Valine Biosynthesis	0	0	1000	0	2	2.2.1.6	ilvH
KARA1	ketol-acid reductoisomerase (2,3-dihydroxy-3-methylbutanoate)	alac-S[c] + h[c] + nadph[c] <=> 23dhmb[c] + nadp[c]	fig|235572.25.peg.98	fig|235572.25.peg.98		Valine Biosynthesis	1	-1000	1000	0	2	1.1.1.86	ilvC
DHAD1	dihydroxy-acid dehydratase (2,3-dihydroxy-3-methylbutanoate)	23dhmb[c] => 3mob[c] + h2o[c]	fig|235572.25.peg.44	fig|235572.25.peg.44		Valine Biosynthesis	0	0	1000	0	2	4.2.1.9	trpAB
IPPS	2-isopropylmalate synthase	3mob[c] + accoa[c] + h2o[c] => 3c3hmp[c] + coa[c] + h[c]	fig|235572.25.peg.224	fig|235572.25.peg.224		Leucine Biosynthesis	0	0	1000	0	2	2.3.3.13	leuB
IPPMIb	2-isopropylmalate hydratase	3c3hmp[c] <=> 2ippm[c] + h2o[c]	(fig|235572.25.peg.54 and fig|235572.25.peg.228)	fig|235572.25.peg.54 fig|235572.25.peg.228		Leucine Biosynthesis	1	-1000	1000	0	2	4.2.1.33	leuC
IPPMIa	3-isopropylmalate dehydratase	2ippm[c] + h2o[c] <=> 3c2hmp[c]	(fig|235572.25.peg.54 and fig|235572.25.peg.228)	fig|235572.25.peg.54 fig|235572.25.peg.228		Leucine Biosynthesis	1	-1000	1000	0	2	4.2.1.33	leucD
IPMD	3-isopropylmalate dehydrogenase	3c2hmp[c] + nad[c] => 3c4mop[c] + h[c] + nadh[c]	fig|235572.25.peg.53	fig|235572.25.peg.53		Leucine Biosynthesis	0	0	1000	0	2	1.1.1.85	leuB
OMCDC	2-Oxo-4-methyl-3-carboxypentanoate decarboxylation	3c4mop[c] + h[c] => 4mop[c] + co2[c]	fig|235572.25.peg.53	fig|235572.25.peg.53		Leucine Biosynthesis	0	0	1000	0	2	1.1.1.85	spontaneous
HEX1	glucokinase	atp[c] + glc-D[c] => adp[c] + g6p[c] + h[c]	fig|235572.25.peg.171	fig|235572.25.peg.171		Glycolysis	0	0	1000	0	2	2.7.1.1	glk
PDH	pyruvate dehydrogenase	coa[c] + nad[c] + pyr[c] => accoa[c] + co2[c] + nadh[c]	(fig|235572.25.peg.237 and fig|235572.25.peg.238 and fig|235572.25.peg.262)	fig|235572.25.peg.237 fig|235572.25.peg.238 fig|235572.25.peg.262		Glycolysis	0	0	1000	0	2	1.2.4.1	aceE
AKGDH	2-Oxoglutarate dehydrogenase	akg[c] + coa[c] + nad[c] => co2[c] + nadh[c] + succoa[c]	(fig|235572.25.peg.264 and fig|235572.25.peg.263 and fig|235572.25.peg.262)	fig|235572.25.peg.264 fig|235572.25.peg.263 fig|235572.25.peg.262		Citric Acid Cycle	0	0	1000	0	2		sucAB lpd
G6PDH2	glucose 6-phosphate dehydrogenase	g6p[c] + nadp[c] => 6pgl[c] + h[c] + nadph[c]	fig|235572.25.peg.172	fig|235572.25.peg.172		Pentose Phosphate Pathway	0	0	1000	0	2	1.1.1.49	gnd
GND	phosphogluconate dehydrogenase	6pgc[c] + nadp[c] => co2[c] + nadph[c] + ru5p-D[c]	fig|235572.25.peg.30	fig|235572.25.peg.30		Pentose Phosphate Pathway	0	0	1000	0	2	1.1.1.44	atpA
ATPS4rpp	ATP synthase (four protons for one ATP) (periplasm)	adp[c] + pi[c] + 4 h[p] <=> atp[c] + 3 h[c] + h2o[c]	(fig|235572.25.peg.56 and fig|235572.25.peg.57 and fig|235572.25.peg.58 and fig|235572.25.peg.59)	fig|235572.25.peg.56 fig|235572.25.peg.57 fig|235572.25.peg.58 fig|235572.25.peg.59		Oxidative Phosphorylation	1	-1000	1000	0	2	7.1.2.2;3.6.3.14	ATpABCD
CYTBO3_4pp	cytochrome oxidase bo3 (ubiquinol-8: 4 protons) (periplasm)	4 h[c] + 0.5 o2[c] + q8h2[c] => h2o[c] + q8[c] + 4 h[p]	(fig|235572.25.peg.249 and fig|235572.25.peg.250 and fig|235572.25.peg.251 and fig|235572.25.peg.252)	fig|235572.25.peg.249 fig|235572.25.peg.250 fig|235572.25.peg.251 fig|235572.25.peg.252		Oxidative Phosphorylation	0	0	1000	0	2	1.10.3.-	cyoABCDE
NADH16pp	NADH dehydrogenase (ubiquinone-8 & 3 protons) (periplasm)	4 h[c] + nadh[c] + q8[c] => nad[c] + q8h2[c] + 3 h[p]	(fig|235572.25.peg.74 and fig|235572.25.peg.75 and fig|235572.25.peg.76 and fig|235572.25.peg.77 and fig|235572.25.peg.78 and fig|235572.25.peg.79 and fig|235572.25.peg.80 and fig|235572.25.peg.81 and fig|235572.25.peg.82 and fig|235572.25.peg.83 and fig|235572.25.peg.84 and fig|235572.25.peg.85 and fig|235572.25.peg.86)	fig|235572.25.peg.74 fig|235572.25.peg.75 fig|235572.25.peg.76 fig|235572.25.peg.77 fig|235572.25.peg.78 fig|235572.25.peg.79 fig|235572.25.peg.80 fig|235572.25.peg.81 fig|235572.25.peg.82 fig|235572.25.peg.83 fig|235572.25.peg.84 fig|235572.25.peg.85 fig|235572.25.peg.86		Oxidative Phosphorylation	0	0	1000	0	2	7.1.1.2;1.6.5.3	nuoABCDEFGHIJKLM
PSY1	phytoene synthase (1)	2 ggdp[c] => ppi[c] + prephytedp[c]	fig|235572.25.peg.123	fig|235572.25.peg.123		Carotenoid biosynthesis	0	0	1000	0	2	2.5.1.32	crtB
PSY2	phytoene synthase (2)	prephytedp[c] => ppi[c] + phytoe[c]	fig|235572.25.peg.123	fig|235572.25.peg.123		Carotenoid biosynthesis	0	0	1000	0	2	2.5.1.32	crtB
PDS1	phytoene desaturase (1)	nadp[c] + phytoe[c] => h[c] + nadph[c] + phytof[c]	fig|235572.25.peg.122	fig|235572.25.peg.122		Carotenoid biosynthesis	0	0	1000	0	2	1.3.99.31	crtI
PDS2	phytoene desaturase (2)	nadp[c] + phytof[c] => h[c] + nadph[c] + zcarote[c]	fig|235572.25.peg.122	fig|235572.25.peg.122		Carotenoid biosynthesis	0	0	1000	0	2	1.3.99.31	crtI
ZCAROTDH1	zeta-carotene desaturase (1)	h[c] + o2[c] + nadph[c] + zcarote[c] => 2 h2o[c] + nadp[c] + neuspn[c]	fig|235572.25.peg.122	fig|235572.25.peg.122		Carotenoid Biosynthesis	0	0	1000	0	2	1.3.99.31	crtI
ZCAROTDH2	zeta-carotene desaturase(2)	h[c] + o2[c] + nadph[c] + neuspn[c] => 2 h2o[c] + nadp[c] + lycop[c]	fig|235572.25.peg.122	fig|235572.25.peg.122		Carotenoid Biosynthesis	0	0	1000	0	2	1.3.99.31	crtI
LCYBZC	lycopene cyclase (beta-zeacarotene producing)	neuspn[c] => bzcarote[c]	fig|235572.25.peg.122	fig|235572.25.peg.122		Carotenoid biosynthesis	0	0	1000	0	2	5.5.1.19	crtY
GLUTRS	Glutamyl-tRNA synthetase	atp[c] + glu-L[c] + trnaglu[c] => amp[c] + glutrna[c] + ppi[c]	fig|235572.25.peg.265	fig|235572.25.peg.265		Heme Biosynthesis	0	0	1000	0	2	6.1.1.17	gltX
HEMEOS	Heme O synthase	frdp[c] + h2o[c] + pheme[c] => hemeO[c] + ppi[c]	fig|235572.25.peg.248	fig|235572.25.peg.248		Heme Biosynthesis	0	0	1000	0	2	2.5.1.-;2.5.1.141	cyoE
LIPOS	Lipoate synthase	4fe4s[c] + 2 amet[c] + h[c] + nad[c] + octapb[c] => 2fe2s[c] + 2 dad-5[c] + 2 fe2[c] + lipopb[c] + 2 met-L[c] + nadh[c]	fig|235572.25.peg.153	fig|235572.25.peg.153		Lipoate Biosynthesis and Incorporation I	0	0	1000	0	2	2.8.1.8	lipA
MTHFR2	5,10-methylenetetrahydrofolate reductase (NADH)	2 h[c] + mlthf[c] + nadh[c] => 5mthf[c] + nad[c]	fig|235572.25.peg.178	fig|235572.25.peg.178		Folate Metabolism	0	0	1000	0	2	1.5.1.20
SCYSDS	SUF Cysteine desulfuration	cys-L[c] + sufse[c] => ala-L[c] + sufsesh[c]	fig|235572.25.peg.35	fig|235572.25.peg.35		Cofactor and Prosthetic Group Biosynthesis	0	0	1000	0	2	2.8.1.7
S2FE2SR	SUF [2Fe-2S] regeneration	2fe1s[c] + atp[c] + h2o[c] + sufbcd[c] + sufsesh[c] => adp[c] + 5 h[c] + pi[c] + sufbcd-2fe2s[c] + sufse[c]	(fig|235572.25.peg.40 and fig|235572.25.peg.37 and fig|235572.25.peg.36 and fig|235572.25.peg.241 and fig|235572.25.peg.35)	fig|235572.25.peg.40 fig|235572.25.peg.37 fig|235572.25.peg.36 fig|235572.25.peg.241 fig|235572.25.peg.35		Cofactor and Prosthetic Group Biosynthesis	0	0	1000	0	2		sufBCDSE
S4FE4SR	SUF [4Fe-4S] Reduction	fadh2[c] + 2 h[c] + sufbcd-2fe2s2[c] => fad[c] + sufbcd-4fe4s[c]	(fig|235572.25.peg.40 and fig|235572.25.peg.37 and fig|235572.25.peg.36)	fig|235572.25.peg.40 fig|235572.25.peg.37 fig|235572.25.peg.36		Cofactor and Prosthetic Group Biosynthesis	0	0	1000	0	2		sufBCD
S4FE4ST	SUF [4Fe-4S] Transfer	4 h[c] + sufbcd-4fe4s[c] => 4fe4s[c] + sufbcd[c]	(fig|235572.25.peg.40 and fig|235572.25.peg.37 and fig|235572.25.peg.36)	fig|235572.25.peg.40 fig|235572.25.peg.37 fig|235572.25.peg.36		Cofactor and Prosthetic Group Biosynthesis	0	0	1000	0	2		sufABCD
S2FE2SS	SUF [2Fe-2S] Synthesis	atp[c] + fadh2[c] + 2 fe2[c] + h2o[c] + sufbcd[c] + 2 sufsesh[c] => adp[c] + fad[c] + 7 h[c] + pi[c] + sufbcd-2fe2s[c] + 2 sufse[c]	(fig|235572.25.peg.40 and fig|235572.25.peg.37 and fig|235572.25.peg.36 and fig|235572.25.peg.241 and fig|235572.25.peg.35)	fig|235572.25.peg.40 fig|235572.25.peg.37 fig|235572.25.peg.36 fig|235572.25.peg.241 fig|235572.25.peg.35		Cofactor and Prosthetic Group Biosynthesis	0	0	1000	0	2		sufBCDSE
S2FE2SS2	SUF [2Fe-2S] Synthesis II	atp[c] + fadh2[c] + 2 fe2[c] + h2o[c] + sufbcd-2fe2s[c] + 2 sufsesh[c] => adp[c] + fad[c] + 7 h[c] + pi[c] + sufbcd-2fe2s2[c] + 2 sufse[c]	(fig|235572.25.peg.40 and fig|235572.25.peg.37 and fig|235572.25.peg.36 and fig|235572.25.peg.241 and fig|235572.25.peg.35)	fig|235572.25.peg.40 fig|235572.25.peg.37 fig|235572.25.peg.36 fig|235572.25.peg.241 fig|235572.25.peg.35		Cofactor and Prosthetic Group Biosynthesis	0	0	1000	0	2		sufBCDSE
DPR	2-dehydropantoate 2-reductase	2dhp[c] + h[c] + nadph[c] => nadp[c] + pant-R[c]	fig|235572.25.peg.98	fig|235572.25.peg.98		Phosphopantothenate Biosynthesis	0	0	1000	0	2	1.1.1.169	trpAB
CLPNS160pp	cardiolipin synthase (periplasmic, n-C16:0)	2 pg160[c] <=> clpn160[c] + glyc[c]	fig|235572.25.peg.160	fig|235572.25.peg.160		Cardiolipin Biosynthesis	1	-1000	1000	0	2	2.7.8.-
P_GROW	Biomass objective function	0.3208 ala-L[c] + 0.21594 arg-L[c] + 0.27238 asn-L[c] + 0.28334 asp-L[c] + 0.03231 cys-L[c] + 0.1607 gln-L[c] + 0.37901 glu-L[c] + 0.32163 gly[c] + 0.082 his-L[c] + 0.43019 ile-L[c] + 0.42814 leu-L[c] + 0.43881 lys-L[c] + 0.14595 met-L[c] + 0.15598 phe-L[c] + 0.15415 pro-L[c] + 0.32982 ser-L[c] + 0.25236 thr-L[c] + 0.03107 trp-L[c] + 0.12909 tyr-L[c] + 0.36104 val-L[c] + 0.03667 datp[c] + 0.01303…				Biomass	0	0	1000	1	2
DM_4FE4S	Source to allow [4Fe-4S] iron-sulfur cluster to enter system	=> 4fe4s[c]				Source	0	0	1000	0	2
DM_SUFSE	Source to allow SUFSE to enter system	=> sufse[c]				Source	0	0	1000	0	2
DM_SUFSESH	Sink to allow SUFSESH to leave system	sufsesh[c] =>				Sink	0	0	1000	0	2
DM_LIPOPB	Sink to allow lipoate to leave system	lipopb[c] =>				Sink	0	0	1000	0	2
DM_GLYC	Sink to allow Glycerol to leave system	glyc[c] =>				Sink	0	0	1000	0	2
O2tex	oxygen transport via diffusion	o2[e] <=> o2[c]				Transport	1	-20	1000	0	2
H2Otex	H2O transport via diffusion	h2o[e] <=> h2o[c]				Transport	1	-1000	1000	0	2
CO2tcy	CO2 transport via diffusion	co2[c] <=> co2[e]				Transport	1	-1000	1000	0	2
FE2tex	iron (II) transport via diffusion	fe2[e] <=> fe2[c]				Transport	1	-1000	1000	0	2
Htex	H transport by diffusion	h[p] <=> h[e]				Transport	1	-1000	1000	0	2
Pitex	Phosphate transport by diffusion	pi[c] <=> pi[e]				Transport	1	-1000	1000	0	2
UP_Q8H2	Import Ubiquinol-8	q8h2[e] => q8h2[c]				Transport	0	0	1000	0	2
UP_HCO3	Import HCO3	hco3[e] => hco3[c]				Transport	0	0	1000	0	2
UP_6PGC	Import 6-Phospho-D-gluconate	6pgc[e] => 6pgc[c]				Transport	0	0	1000	0	2
UP_2DHP	Import 2-Dehydropantoate	2dhp[e] => 2dhp[c]				Transport	0	0	1000	0	2
UP_PYR	Import Pyruvate	pyr[e] => pyr[c]				Transport	0	0	1000	0	2
UP_E4P	Import D-Erythrose 4-phosphate	e4p[e] => e4p[c]				Transport	0	0	1000	0	2
UP_PEP	Import Phosphoenolpyruvate	pep[e] => pep[c]				Transport	0	0	1000	0	2
UP_R5P	Import alpha-D-Ribose 5-phosphate	r5p[e] => r5p[c]				Transport	0	0	1000	0	2
UP_PG160	Import Phosphatidylglycerol (didodecanoyl, n-C12:0)	pg160[e] => pg160[c]				Transport	0	0	1000	0	2
UP_GGDP	Import Geranylgeranyl diphosphate	ggdp[e] => ggdp[c]				Transport	0	0	1000	0	2
UP_GLC-D	Import D-Glucose	glc-D[e] => glc-D[c]				Transport	0	0	1000	0	2
UP_FRDP	Import Farnesyl diphosphate	frdp[e] => frdp[c]				Transport	0	0	1000	0	2
UP_TRNAGLU	Import tRNA (Glu)	trnaglu[e] => trnaglu[c]				Transport	0	0	1000	0	2
UP_OCTAPB	Import octanoate (protein bound)	octapb[e] => octapb[c]				Transport	0	0	1000	0	2
UP_FADH2	Import FADH2	fadh2[e] => fadh2[c]				Transport	0	0	1000	0	2
UP_PYDX5P	Import Pyridoxal 5'-phosphate	pydx5p[e] => pydx5p[c]				Transport	0	0	1000	0	2
UP_THMPP	Import Thiamine diphosphate	thmpp[e] => thmpp[c]				Transport	0	0	1000	0	2
UP_FMNH2	Import Reduced FMN	fmnh2[e] => fmnh2[c]				Transport	0	0	1000	0	2
UP_THDP	Import 2,3,4,5-Tetrahydrodipicolinate	thdp[e] => thdp[c]				Transport	0	0	1000	0	2
UP_MLTHF	Import 5,10-Methylenetetrahydrofolate	mlthf[e] => mlthf[c]				Transport	0	0	1000	0	2
UP_COA	Import Coenzyme A	coa[e] => coa[c]				Transport	0	0	1000	0	2
UP_PHEME	Import Protoheme	pheme[e] => pheme[c]				Transport	0	0	1000	0	2
UP_NADP	Import NADP	nadp[e] => nadp[c]				Transport	0	0	1000	0	2
UP_NADH	Import NADH	nadh[e] => nadh[c]				Transport	0	0	1000	0	2
UP_DATP	Import dATP	datp[e] => datp[c]				Transport	0	0	1000	0	2
UP_DCTP	Import dCTP	dctp[e] => dctp[c]				Transport	0	0	1000	0	2
UP_DGTP	Import dGTP	dgtp[e] => dgtp[c]				Transport	0	0	1000	0	2
UP_DTTP	Import dTTP	dttp[e] => dttp[c]				Transport	0	0	1000	0	2
UP_ADP	Import ADP	adp[e] => adp[c]				Transport	0	0	1000	0	2
UP_CTP	Import CTP	ctp[e] => ctp[c]				Transport	0	0	1000	0	2
UP_GTP	Import GTP	gtp[e] => gtp[c]				Transport	0	0	1000	0	2
UP_UTP	Import UTP	utp[e] => utp[c]				Transport	0	0	1000	0	2
UP_AMET	Import S-Adenosyl-L-methionine	amet[e] => amet[c]				Transport	0	0	1000	0	2
UP_HCYS-L	Import L-Homocysteine	hcys-L[e] => hcys-L[c]				Transport	0	0	1000	0	2
UP_ORN	Import Ornithine	orn[e] => orn[c]				Transport	0	0	1000	0	2
UP_CBP	Import Carbamoyl phosphate	cbp[e] => cbp[c]				Transport	0	0	1000	0	2
UP_ALA-L	Import L-Alanine	ala-L[e] => ala-L[c]				Transport	0	0	1000	0	2
UP_ASN-L	Import L-Asparagine	asn-L[e] => asn-L[c]				Transport	0	0	1000	0	2
UP_ASP-L	Import L-Aspartate	asp-L[e] => asp-L[c]				Transport	0	0	1000	0	2
UP_CYS-L	Import L-Cysteine	cys-L[e] => cys-L[c]				Transport	0	0	1000	0	2
UP_GLN-L	Import L-Glutamine	gln-L[e] => gln-L[c]				Transport	0	0	1000	0	2
UP_GLY	Import Glycine	gly[e] => gly[c]				Transport	0	0	1000	0	2
UP_PRO-L	Import L-Proline	pro-L[e] => pro-L[c]				Transport	0	0	1000	0	2
UP_SER-L	Import L-Serine	ser-L[e] => ser-L[c]				Transport	0	0	1000	0	2
UP_TYR-L	Import L-Tyrosine	tyr-L[e] => tyr-L[c]				Transport	0	0	1000	0	2
UP_ARG-L	Import Arginine	arg-L[e] => arg-L[c]				Transport	0	0	1000	0	2
UP_HIS-L	Import Histidine	his-L[e] => his-L[c]				Transport	0	0	1000	0	2
UP_ILE-L	Import Isoleucine	ile-L[e] => ile-L[c]				Transport	0	0	1000	0	2
UP_LEU-L	Import Leucine	leu-L[e] => leu-L[c]				Transport	0	0	1000	0	2
UP_LYS-L	Import L-Lysine	lys-L[e] => lys-L[c]				Transport	0	0	1000	0	2
UP_PHE-L	Import Phenylalanine	phe-L[e] => phe-L[c]				Transport	0	0	1000	0	2
UP_VAL-L	Import L-Valine	val-L[e] => val-L[c]				Transport	0	0	1000	0	2
UP_ACG5SA	Import N-Acetyl-L-glutamate 5-semialdehyde	acg5sa[e] => acg5sa[c]				Transport	0	0	1000	0	2
EF_CHOR	Export Chorismate	chor[c] => chor[e]				Transport	0	0	1000	0	2
EF_SUCC	Export Succinate	succ[c] => succ[e]				Transport	0	0	1000	0	2
EF_6PGL	Export 6-phospho-D-glucono-1,5-lactone	6pgl[c] => 6pgl[e]				Transport	0	0	1000	0	2
EF_RU5P-D	Export D-Ribulose 5-phosphate	ru5p-D[c] => ru5p-D[e]				Transport	0	0	1000	0	2
EF_G3P	Export Glyceraldehyde 3-phosphate	g3p[c] => g3p[e]				Transport	0	0	1000	0	2
EF_PPI	Export Diphosphate	ppi[c] => ppi[e]				Transport	0	0	1000	0	2
EF_PANT-R	Export (R)-Pantoate	pant-R[c] => pant-R[e]				Transport	0	0	1000	0	2
EF_PHPYR	Export Phenylpyruvate	phpyr[c] => phpyr[e]				Transport	0	0	1000	0	2
EF_3MOB	Export 3-Methyl-2-oxobutanoate	3mob[c] <=> 3mob[e]				Transport	0	0	1000	0	2
EF_3MOP	Export (S)-3-Methyl-2-oxopentanoate	3mop[c] => 3mop[e]				Transport	0	0	1000	0	2
EF_4MOP	Export 4-Methyl-2-oxopentanoate	4mop[c] => 4mop[e]				Transport	0	0	1000	0	2
EF_SUCCOA	Export succinyl coA	succoa[c] <=> succoa[e]				Transport	0	0	1000	0	2
EF_DAD-5	Export 5'-Deoxyadenosine	dad-5[c] => dad-5[e]				Transport	0	0	1000	0	2
EF_AMP	Export AMP	amp[c] => amp[e]				Transport	0	0	1000	0	2
EF_THF	Export 5,6,7,8-Tetrahydrofolate	thf[c] => thf[e]				Transport	0	0	1000	0	2
EF_FAD	Export FAD	fad[c] => fad[e]				Transport	0	0	1000	0	2
EF_AICAR	Export 5-Amino-1-(5-Phospho-D-ribosyl)imidazole-4-carboxamide	aicar[c] => aicar[e]				Transport	0	0	1000	0	2
EF_NH4	Export ammonia	nh4[c] <=> nh4[e]				Transport	0	0	1000	0	2
EF_GLUTRNA	Export L-Glutamyl-tRNA(Glu)	glutrna[c] => glutrna[e]				Transport	0	0	1000	0	2
EF_CITR-L	Export L-Citrulline	citr-L[c] => citr-L[e]				Transport	0	0	1000	0	2
EF_23DHDP	Export 2,3-Dihydrodipicolinate	23dhdp[c] => 23dhdp[e]				Transport	0	0	1000	0	2
EF_26DAP-LL	Export LL-2,6-Diaminoheptanedioate	26dap-LL[c] => 26dap-LL[e]				Transport	0	0	1000	0	2
EF_ARGSUC	Export N(omega)-(L-Arginino)succinate	argsuc[c] => argsuc[e]				Transport	0	0	1000	0	2
EF_HISP	Export L-Histidinol phosphate	hisp[c] => hisp[e]				Transport	0	0	1000	0	2
EF_TRP-L	Export L-Tryptophan	trp-L[c] => trp-L[e]				Transport	0	0	1000	0	2
EF_THR-L	Export L-Threonine	thr-L[c] => thr-L[e]				Transport	0	0	1000	0	2
EF_MET-L	Export L-Methionine	met-L[c] => met-L[e]				Transport	0	0	1000	0	2
EF_ACORN	Export acetylornithine	acorn[c] => acorn[e]				Transport	0	0	1000	0	2
EX_o2(e)	Exchange oxygen	o2[e] <=>				Exchange	1	-20	1000	0	2
EX_h2o(e)	Exchange H2O	h2o[e] <=>				Exchange	1	-1000	1000	0	2
EX_co2(e)	Exchange CO2	co2[e] <=>				Exchange	1	-1000	1000	0	2
EX_fe2(e)	Exchange iron (II)	fe2[e] <=>				Exchange	1	-1000	1000	0	2
EX_h(e)	Exchange H	h[e] <=>				Exchange	1	-1000	1000	0	2
EX_pi(e)	Exchange Phosphate	pi[e] <=>				Exchange	1	-1000	1000	0	2
EX_q8h2(e)	Exchange Ubiquinol-8	q8h2[e] <=>				Exchange	1	-1000	1000	0	2
EX_hco3(e)	Exchange HCO3	hco3[e] <=>				Exchange	1	-1000	1000	0	2
EX_6pgc(e)	Exchange 6-Phospho-D-gluconate	6pgc[e] <=>				Exchange	1	-1000	1000	0	2
EX_2dhp(e)	Exchange 2-Dehydropantoate	2dhp[e] <=>				Exchange	1	-1000	1000	0	2
EX_pyr(e)	Exchange Pyruvate	pyr[e] <=>				Exchange	1	-1000	1000	0	2
EX_e4p(e)	Exchange D-Erythrose 4-phosphate	e4p[e] <=>				Exchange	1	-1000	1000	0	2
EX_pep(e)	Exchange Phosphoenolpyruvate	pep[e] <=>				Exchange	1	-1000	1000	0	2
EX_r5p(e)	Exchange alpha-D-Ribose 5-phosphate	r5p[e] <=>				Exchange	1	-1000	1000	0	2
EX_pg160(e)	Exchange Phosphatidylglycerol (didodecanoyl, n-C12:0)	pg160[e] <=>				Exchange	1	-1000	1000	0	2
EX_ggdp(e)	Exchange Geranylgeranyl diphosphate	ggdp[e] <=>				Exchange	1	-1000	1000	0	2
EX_glc-D(e)	Exchange D-Glucose	glc-D[e] <=>				Exchange	1	-1000	1000	0	2
EX_frdp(e)	Exchange Farnesyl diphosphate	frdp[e] <=>				Exchange	1	-1000	1000	0	2
EX_trnaglu(e)	Exchange tRNA (Glu)	trnaglu[e] <=>				Exchange	1	-1000	1000	0	2
EX_octapb(e)	Exchange octanoate (protein bound)	octapb[e] <=>				Exchange	1	-1000	1000	0	2
EX_fadh2(e)	Exchange FADH2	fadh2[e] <=>				Exchange	1	-1000	1000	0	2
EX_pydx5p(e)	Exchange Pyridoxal 5'-phosphate	pydx5p[e] <=>				Exchange	1	-1000	1000	0	2
EX_thmpp(e)	Exchange Thiamine diphosphate	thmpp[e] <=>				Exchange	1	-1000	1000	0	2
EX_fmnh2(e)	Exchange Reduced FMN	fmnh2[e] <=>				Exchange	1	-1000	1000	0	2
EX_thdp(e)	Exchange 2,3,4,5-Tetrahydrodipicolinate	thdp[e] <=>				Exchange	1	-1000	1000	0	2
EX_mlthf(e)	Exchange 5,10-Methylenetetrahydrofolate	mlthf[e] <=>				Exchange	1	-1000	1000	0	2
EX_coa(e)	Exchange Coenzyme A	coa[e] <=>				Exchange	1	-1000	1000	0	2
EX_pheme(e)	Exchange Protoheme	pheme[e] <=>				Exchange	1	-1000	1000	0	2
EX_nadp(e)	Exchange NADP	nadp[e] <=>				Exchange	1	-1000	1000	0	2
EX_nadh(e)	Exchange NADH	nadh[e] <=>				Exchange	1	-1000	1000	0	2
EX_datp(e)	Exchange dATP	datp[e] <=>				Exchange	1	-1000	1000	0	2
EX_dctp(e)	Exchange dCTP	dctp[e] <=>				Exchange	1	-1000	1000	0	2
EX_dgtp(e)	Exchange dGTP	dgtp[e] <=>				Exchange	1	-1000	1000	0	2
EX_dttp(e)	Exchange dTTP	dttp[e] <=>				Exchange	1	-1000	1000	0	2
EX_adp(e)	Exchange ADP	adp[e] <=>				Exchange	1	-1000	1000	0	2
EX_ctp(e)	Exchange CTP	ctp[e] <=>				Exchange	1	-1000	1000	0	2
EX_gtp(e)	Exchange GTP	gtp[e] <=>				Exchange	1	-1000	1000	0	2
EX_utp(e)	Exchange UTP	utp[e] <=>				Exchange	1	-1000	1000	0	2
EX_amet(e)	Exchange S-Adenosyl-L-methionine	amet[e] <=>				Exchange	1	-1000	1000	0	2
EX_hcys-L(e)	Exchange L-Homocysteine	hcys-L[e] <=>				Exchange	1	-1000	1000	0	2
EX_orn(e)	Exchange Ornithine	orn[e] <=>				Exchange	1	-1000	1000	0	2
EX_cbp(e)	Exchange Carbamoyl phosphate	cbp[e] <=>				Exchange	1	-1000	1000	0	2
EX_ala-L(e)	Exchange L-Alanine	ala-L[e] <=>				Exchange	1	-1000	1000	0	2
EX_asn-L(e)	Exchange L-Asparagine	asn-L[e] <=>				Exchange	1	-1000	1000	0	2
EX_asp-L(e)	Exchange L-Aspartate	asp-L[e] <=>				Exchange	1	-1000	1000	0	2
EX_cys-L(e)	Exchange L-Cysteine	cys-L[e] <=>				Exchange	1	-1000	1000	0	2
EX_gln-L(e)	Exchange L-Glutamine	gln-L[e] <=>				Exchange	1	-1000	1000	0	2
EX_gly(e)	Exchange Glycine	gly[e] <=>				Exchange	1	-1000	1000	0	2
EX_pro-L(e)	Exchange L-Proline	pro-L[e] <=>				Exchange	1	-1000	1000	0	2
EX_ser-L(e)	Exchange L-Serine	ser-L[e] <=>				Exchange	1	-1000	1000	0	2
EX_tyr-L(e)	Exchange L-Tyrosine	tyr-L[e] <=>				Exchange	1	-1000	1000	0	2
EX_arg-L(e)	Exchange Arginine	arg-L[e] <=>				Exchange	1	-1000	1000	0	2
EX_his-L(e)	Exchange Histidine	his-L[e] <=>				Exchange	1	-1000	1000	0	2
EX_ile-L(e)	Exchange Isoleucine	ile-L[e] <=>				Exchange	1	-1000	1000	0	2
EX_leu-L(e)	Exchange Leucine	leu-L[e] <=>				Exchange	1	-1000	1000	0	2
EX_lys-L(e)	Exchange L-Lysine	lys-L[e] <=>				Exchange	1	-1000	1000	0	2
EX_phe-L(e)	Exchange Phenylalanine	phe-L[e] <=>				Exchange	1	-1000	1000	0	2
EX_val-L(e)	Exchange L-Valine	val-L[e] <=>				Exchange	1	-1000	1000	0	2
EX_chor(e)	Exchange Chorismate	chor[e] <=>				Exchange	1	-1000	1000	0	2
EX_succ(e)	Exchange Succinate	succ[e] <=>				Exchange	1	-1000	1000	0	2
EX_6pgl(e)	Exchange 6-phospho-D-glucono-1,5-lactone	6pgl[e] <=>				Exchange	1	-1000	1000	0	2
EX_ru5p-D(e)	Exchange D-Ribulose 5-phosphate	ru5p-D[e] <=>				Exchange	1	-1000	1000	0	2
EX_g3p(e)	Exchange Glyceraldehyde 3-phosphate	g3p[e] <=>				Exchange	1	-1000	1000	0	2
EX_ppi(e)	Exchange Diphosphate	ppi[e] <=>				Exchange	1	-1000	1000	0	2
EX_pant-R(e)	Exchange (R)-Pantoate	pant-R[e] <=>				Exchange	1	-1000	1000	0	2
EX_phpyr(e)	Exchange Phenylpyruvate	phpyr[e] <=>				Exchange	1	-1000	1000	0	2
EX_3mob(e)	Exchange 3-Methyl-2-oxobutanoate	3mob[e] <=>				Exchange	1	-1000	1000	0	2
EX_3mop(e)	Exchange (S)-3-Methyl-2-oxopentanoate	3mop[e] <=>				Exchange	1	-1000	1000	0	2
EX_4mop(e)	Exchange 4-Methyl-2-oxopentanoate	4mop[e] <=>				Exchange	1	-1000	1000	0	2
EX_succoa(e)	Exchange succinyl coA	succoa[e] <=>				Exchange	1	-1000	1000	0	2
EX_dad-5(e)	Exchange 5'-Deoxyadenosine	dad-5[e] <=>				Exchange	1	-1000	1000	0	2
EX_amp(e)	Exchange AMP	amp[e] <=>				Exchange	1	-1000	1000	0	2
EX_thf(e)	Exchange 5,6,7,8-Tetrahydrofolate	thf[e] <=>				Exchange	1	-1000	1000	0	2
EX_fad(e)	Exchange FAD	fad[e] <=>				Exchange	1	-1000	1000	0	2
EX_aicar(e)	Exchange 5-Amino-1-(5-Phospho-D-ribosyl)imidazole-4-carboxamide	aicar[e] <=>				Exchange	1	-1000	1000	0	2
EX_nh4(e)	Exchange ammonia	nh4[e] <=>				Exchange	1	-1000	1000	0	2
EX_glutrna(e)	Exchange L-Glutamyl-tRNA(Glu)	glutrna[e] <=>				Exchange	1	-1000	1000	0	2
EX_citr-L(e)	Exchange L-Citrulline	citr-L[e] <=>				Exchange	1	-1000	1000	0	2
EX_23dhdp(e)	Exchange 2,3-Dihydrodipicolinate	23dhdp[e] <=>				Exchange	1	-1000	1000	0	2
EX_26dap-LL(e)	Exchange LL-2,6-Diaminoheptanedioate	26dap-LL[e] <=>				Exchange	1	-1000	1000	0	2
EX_argsuc(e)	Exchange N(omega)-(L-Arginino)succinate	argsuc[e] <=>				Exchange	1	-1000	1000	0	2
EX_hisp(e)	Exchange L-Histidinol phosphate	hisp[e] <=>				Exchange	1	-1000	1000	0	2
EX_trp-L(e)	Exchange L-Tryptophan	trp-L[e] <=>				Exchange	1	-1000	1000	0	2
EX_thr-L(e)	Exchange L-Threonine	thr-L[e] <=>				Exchange	1	-1000	1000	0	2
EX_met-L(e)	Exchange L-Methionine	met-L[e] <=>				Exchange	1	-1000	1000	0	2
EX_acg5sa(e)	Exchange N-Acetyl-L-glutamate 5-semialdehyde	acg5sa[e] <=>				Exchange	1	-1000	1000	0	2
EX_acorn(e)	Exchange acetylornithine	acorn[e] <=>				Exchange	1	-1000	1000	0	2

## Sheet: Metabolite List
Abbreviation	Description	Neutral formula	Charged formula	Charge	Compartment	KEGG ID	PubChem ID	ChEBI ID	InChI string	SMILES	HMDB ID
23dhdp[e]	2,3-Dihydrodipicolinate	C7H7NO4	C7H5NO4	-2		C03340
23dhdp[c]	2,3-Dihydrodipicolinate	C7H7NO4	C7H5NO4	-2		C03340
23dhmb[c]	(R)-2,3-Dihydroxy-3-methylbutanoate	C5H10O4	C5H9O4	-1		C04272
23dhmp[c]	(R)-2,3-Dihydroxy-3-methylpentanoate	C6H12O4	C6H11O4	-1		C06007
26dap-LL[e]	LL-2,6-Diaminoheptanedioate	C7H14N2O4	C7H14N2O4	0		C00666
26dap-LL[c]	LL-2,6-Diaminoheptanedioate	C7H14N2O4	C7H14N2O4	0		C00666
2ahbut[c]	(S)-2-Aceto-2-hydroxybutanoate	C6H10O4	C6H9O4	-1		C06006
2cpr5p[c]	1-(2-Carboxyphenylamino)-1-deoxy-D-ribulose 5-phosphate	C12H16NO9P	C12H13NO9P	-3		C01302
2dda7p[c]	2-Dehydro-3-deoxy-D-arabino-heptonate 7-phosphate	C7H13O10P	C7H10O10P	-3		C04691
2dhp[e]	2-Dehydropantoate	C6H10O4	C6H9O4	-1		C00966
2dhp[c]	2-Dehydropantoate	C6H10O4	C6H9O4	-1		C00966
2fe1s[c]	[2Fe-1S] desulfurated iron-sulfur cluster	SFe2	SFe2	2
2fe2s[c]	[2Fe-2S] iron-sulfur cluster	S2Fe2	S2Fe2	2
2ippm[c]	2-Isopropylmaleate	C7H10O4	C7H8O4	-2		C02631
2obut[e]	2-Oxobutanoate	C4H6O3	C4H5O3	-1		C00109
2obut[c]	2-Oxobutanoate	C4H6O3	C4H5O3	-1		C00109
3c2hmp[c]	3-Carboxy-2-hydroxy-4-methylpentanoate	C7H12O5	C7H10O5	-2		C04411
3c3hmp[c]	3-Carboxy-3-hydroxy-4-methylpentanoate	C7H12O5	C7H10O5	-2		C02504
3c4mop[c]	3-Carboxy-4-methyl-2-oxopentanoate	C7H10O5	C7H8O5	-2		C04236
3dhq[c]	3-Dehydroquinate	C7H10O6	C7H9O6	-1		C00944
3dhsk[c]	3-Dehydroshikimate	C7H8O5	C7H7O5	-1		C02637
3ig3p[c]	C-(3-Indolyl)-glycerol 3-phosphate	C11H14NO6P	C11H12NO6P	-2		C03506
3mob[e]	3-Methyl-2-oxobutanoate	C5H8O3	C5H7O3	-1		C00141
3mob[c]	3-Methyl-2-oxobutanoate	C5H8O3	C5H7O3	-1		C00141
3mop[e]	(S)-3-Methyl-2-oxopentanoate	C6H10O3	C6H9O3	-1		C00671
3mop[c]	(S)-3-Methyl-2-oxopentanoate	C6H10O3	C6H9O3	-1		C00671
3psme[c]	5-O-(1-Carboxyvinyl)-3-phosphoshikimate	C10H13O10P	C10H9O10P	-4		C01269
4fe4s[c]	[4Fe-4S] iron-sulfur cluster	S4Fe4	S4Fe4	2
4mop[e]	4-Methyl-2-oxopentanoate	C6H10O3	C6H9O3	-1		C00233
4mop[c]	4-Methyl-2-oxopentanoate	C6H10O3	C6H9O3	-1		C00233
4pasp[c]	4-Phospho-L-aspartate	C4H8NO7P	C4H6NO7P	-2		C03082
5mthf[c]	5-Methyltetrahydrofolate	C20H25N7O6	C20H24N7O6	-1		C00440
6pgc[e]	6-Phospho-D-gluconate	C6H13O10P	C6H10O10P	-3		C00345
6pgc[c]	6-Phospho-D-gluconate	C6H13O10P	C6H10O10P	-3		C00345
6pgl[e]	6-phospho-D-glucono-1,5-lactone	C6H11O9P	C6H9O9P	-2		C01236
6pgl[c]	6-phospho-D-glucono-1,5-lactone	C6H11O9P	C6H9O9P	-2		C01236
accoa[c]	Acetyl-CoA	C23H38N7O17P3S	C23H34N7O17P3S	-4		C00024
adp[e]	ADP	C10H15N5O10P2	C10H12N5O10P2	-3		C00008
adp[c]	ADP	C10H15N5O10P2	C10H12N5O10P2	-3		C00008
aicar[e]	5-Amino-1-(5-Phospho-D-ribosyl)imidazole-4-carboxamide	C9H15N4O8P	C9H13N4O8P	-2		C04677
aicar[c]	5-Amino-1-(5-Phospho-D-ribosyl)imidazole-4-carboxamide	C9H15N4O8P	C9H13N4O8P	-2		C04677
akg[c]	2-Oxoglutarate	C5H6O5	C5H4O5	-2		C00026
alac-S[c]	(S)-2-Acetolactate	C5H8O4	C5H7O4	-1		C06010
ala-L[e]	L-Alanine	C3H7NO2	C3H7NO2	0		C00041
ala-L[c]	L-Alanine	C3H7NO2	C3H7NO2	0		C00041
amet[e]	S-Adenosyl-L-methionine	C15H22N6O5S	C15H23N6O5S	1		C00019
amet[c]	S-Adenosyl-L-methionine	C15H22N6O5S	C15H23N6O5S	1		C00019
amp[e]	AMP	C10H14N5O7P	C10H12N5O7P	-2		C00020
amp[c]	AMP	C10H14N5O7P	C10H12N5O7P	-2		C00020
anth[c]	Anthranilate	C7H7NO2	C7H6NO2	-1		C00108
arg-L[e]	L-Arginine	C6H14N4O2	C6H15N4O2	1		C00062
arg-L[c]	L-Arginine	C6H14N4O2	C6H15N4O2	1		C00062
argsuc[e]	N(omega)-(L-Arginino)succinate	C10H18N4O6	C10H17N4O6	-1		C03406
argsuc[c]	N(omega)-(L-Arginino)succinate	C10H18N4O6	C10H17N4O6	-1		C03406
asn-L[e]	L-Asparagine	C4H8N2O3	C4H8N2O3	0		C00152
asn-L[c]	L-Asparagine	C4H8N2O3	C4H8N2O3	0		C00152
asp-L[e]	L-Aspartate	C4H7NO4	C4H6NO4	-1		C00049
asp-L[c]	L-Aspartate	C4H7NO4	C4H6NO4	-1		C00049
aspsa[c]	L-Aspartate 4-semialdehyde	C4H7NO3	C4H7NO3	0		C00441
atp[c]	ATP	C10H16N5O13P3	C10H12N5O13P3	-4		C00002
bzcarote[c]	beta-Zeacarotene	C40H58	C40H58	0		C05434
cbp[e]	Carbamoyl phosphate	CH4NO5P	CH2NO5P	-2		C00169
cbp[c]	Carbamoyl phosphate	CH4NO5P	CH2NO5P	-2		C00169
chor[e]	chorismate	C10H10O6	C10H8O6	-2		C00251
chor[c]	chorismate	C10H10O6	C10H8O6	-2		C00251
citr-L[e]	L-Citrulline	C6H13N3O3	C6H13N3O3	0		C00327
citr-L[c]	L-Citrulline	C6H13N3O3	C6H13N3O3	0		C00327
clpn160[c]	cardiolipin (tetrahexadecanoyl, n-C16:0)	C73H142O17P2	C73H140O17P2	-2		C05980
co2[e]	CO2	CO2	CO2	0		C00011
co2[c]	CO2	CO2	CO2	0		C00011
coa[e]	Coenzyme A	C21H36N7O16P3S	C21H32N7O16P3S	-4		C00010
coa[c]	Coenzyme A	C21H36N7O16P3S	C21H32N7O16P3S	-4		C00010
ctp[e]	CTP	C9H16N3O14P3	C9H12N3O14P3	-4		C00063
ctp[c]	CTP	C9H16N3O14P3	C9H12N3O14P3	-4		C00063
cys-L[e]	L-Cysteine	C3H7NO2S	C3H7NO2S	0		C00097
cys-L[c]	L-Cysteine	C3H7NO2S	C3H7NO2S	0		C00097
dad-5[e]	5-Deoxyadenosine	C10H13N5O3	C10H13N5O3	0		C05198
dad-5[c]	5-Deoxyadenosine	C10H13N5O3	C10H13N5O3	0		C05198
datp[e]	dATP	C10H16N5O12P3	C10H12N5O12P3	-4		C00131
datp[c]	dATP	C10H16N5O12P3	C10H12N5O12P3	-4		C00131
dctp[e]	dCTP	C9H16N3O13P3	C9H12N3O13P3	-4		C00458
dctp[c]	dCTP	C9H16N3O13P3	C9H12N3O13P3	-4		C00458
dgtp[e]	dGTP	C10H16N5O13P3	C10H12N5O13P3	-4		C00286
dgtp[c]	dGTP	C10H16N5O13P3	C10H12N5O13P3	-4		C00286
dttp[e]	dTTP	C10H17N2O14P3	C10H13N2O14P3	-4		C00459
dttp[c]	dTTP	C10H17N2O14P3	C10H13N2O14P3	-4		C00459
e4p[e]	D-Erythrose 4-phosphate	C4H9O7P	C4H7O7P	-2		C00279
e4p[c]	D-Erythrose 4-phosphate	C4H9O7P	C4H7O7P	-2		C00279
eig3p[c]	D-erythro-1-(Imidazol-4-yl)glycerol 3-phosphate	C6H11N2O6P	C6H9N2O6P	-2		C04666
fad[e]	Flavin adenine dinucleotide oxidized	C27H33N9O15P2	C27H31N9O15P2	-2		C00016
fad[c]	Flavin adenine dinucleotide oxidized	C27H33N9O15P2	C27H31N9O15P2	-2		C00016
fadh2[e]	Flavin adenine dinucleotide reduced	C27H35N9O15P2	C27H33N9O15P2	-2		C01352
fadh2[c]	Flavin adenine dinucleotide reduced	C27H35N9O15P2	C27H33N9O15P2	-2
fe2[e]	Fe2+	Fe	Fe	2		C00023
fe2[c]	Fe2+	Fe	Fe	2		C00023
fmnh2[e]	Reduced FMN	C17H23N4O9P	C17H21N4O9P	-2		C01847
fmnh2[c]	Reduced FMN	C17H23N4O9P	C17H21N4O9P	-2		C01847
frdp[e]	Farnesyl diphosphate	C15H28O7P2	C15H25O7P2	-3		C00448
frdp[c]	Farnesyl diphosphate	C15H28O7P2	C15H25O7P2	-3		C00448
g3p[e]	Glyceraldehyde 3-phosphate	C3H7O6P	C3H5O6P	-2		C00661
g3p[c]	Glyceraldehyde 3-phosphate	C3H7O6P	C3H5O6P	-2		C00661
g6p[c]	D-Glucose 6-phosphate	C6H13O9P	C6H11O9P	-2		C00092
ggdp[e]	Geranylgeranyl diphosphate	C20H36O7P2	C20H33O7P2	-3
ggdp[c]	Geranylgeranyl diphosphate	C20H36O7P2	C20H33O7P2	-3
glc-D[e]	D-Glucose	C6H12O6	C6H12O6	0		C00031
glc-D[c]	D-Glucose	C6H12O6	C6H12O6	0		C00031
gln-L[e]	L-Glutamine	C5H10N2O3	C5H10N2O3	0		C00064
gln-L[c]	L-Glutamine	C5H10N2O3	C5H10N2O3	0		C00064
glu-L[c]	L-Glutamate	C5H9NO4	C5H8NO4	-1		C00025
glutrna[e]	L-Glutamyl-tRNA(Glu)	C5H7NO3R	C5H7NO3R	0		C02987
glutrna[c]	L-Glutamyl-tRNA(Glu)	C5H7NO3R	C5H7NO3R	0		C02987
gly[e]	Glycine	C2H5NO2	C2H5NO2	0		C00037
gly[c]	Glycine	C2H5NO2	C2H5NO2	0		C00037
glyc[c]	Glycerol	C3H8O3	C3H8O3	0		C00116
gtp[e]	GTP	C10H16N5O14P3	C10H12N5O14P3	-4		C00044
gtp[c]	GTP	C10H16N5O14P3	C10H12N5O14P3	-4		C00044
h[p]	H+	H	H	1		C00080
h[e]	H+	H	H	1		C00080
h[c]	H+	H	H	1		C00080
h2o[e]	H2O	H2O	H2O	0		C00001
h2o[c]	H2O	H2O	H2O	0		C00001
hco3[e]	Bicarbonate	CH2O3	CHO3	-1		C00288
hco3[c]	Bicarbonate	CH2O3	CHO3	-1		C00288
hcys-L[e]	L-Homocysteine	C4H9NO2S	C4H9NO2S	0		C00155
hcys-L[c]	L-Homocysteine	C4H9NO2S	C4H9NO2S	0		C00155
hemeO[c]	Heme O	C49H58FeN4O5	C49H56FeN4O5	-2		C15672
his-L[e]	L-Histidine	C6H9N3O2	C6H9N3O2	0		C00135
his-L[c]	L-Histidine	C6H9N3O2	C6H9N3O2	0		C00135
hisp[e]	L-Histidinol phosphate	C6H12N3O4P	C6H11N3O4P	-1		C01100
hisp[c]	L-Histidinol phosphate	C6H12N3O4P	C6H11N3O4P	-1		C01100
hom-L[c]	L-Homoserine	C4H9NO3	C4H9NO3	0		C00263
ile-L[e]	L-Isoleucine	C6H13NO2	C6H13NO2	0		C00407
ile-L[c]	L-Isoleucine	C6H13NO2	C6H13NO2	0		C00407
imacp[c]	3-(Imidazol-4-yl)-2-oxopropyl phosphate	C6H9N2O5P	C6H7N2O5P	-2		C01267
indole[c]	Indole	C8H7N	C8H7N	0		C00463
leu-L[e]	L-Leucine	C6H13NO2	C6H13NO2	0		C00123
leu-L[c]	L-Leucine	C6H13NO2	C6H13NO2	0		C00123
lipopb[c]	lipoate (protein bound)	C8H12OS2	C8H13OS2	1
lycop[c]	Lycopene	C40H56	C40H56	0		C05432
lys-L[e]	L-Lysine	C6H14N2O2	C6H15N2O2	1		C00047
lys-L[c]	L-Lysine	C6H14N2O2	C6H15N2O2	1		C00047
met-L[e]	L-Methionine	C5H11NO2S	C5H11NO2S	0		C00073
met-L[c]	L-Methionine	C5H11NO2S	C5H11NO2S	0		C00073
mlthf[e]	5,10-Methylenetetrahydrofolate	C20H23N7O6	C20H21N7O6	-2		C00143
mlthf[c]	5,10-Methylenetetrahydrofolate	C20H23N7O6	C20H21N7O6	-2		C00143
nad[c]	Nicotinamide adenine dinucleotide	C21H28N7O14P2	C21H26N7O14P2	-1		C00003
nadh[e]	Nicotinamide adenine dinucleotide - reduced	C21H29N7O14P2	C21H27N7O14P2	-2		C00004
nadh[c]	Nicotinamide adenine dinucleotide - reduced	C21H29N7O14P2	C21H27N7O14P2	-2		C00004
nadp[e]	Nicotinamide adenine dinucleotide phosphate	C21H28N7O17P3	C21H25N7O17P3	-3		C00006
nadp[c]	Nicotinamide adenine dinucleotide phosphate	C21H28N7O17P3	C21H25N7O17P3	-3		C00006
nadph[c]	Nicotinamide adenine dinucleotide phosphate - reduced	C21H30N7O17P3	C21H26N7O17P3	-4		C00005
neuspn[c]	Neurosporene	C40H58	C40H58	0		C05431
nh4[e]	Ammonium	H3N	H4N	1		C01342
nh4[c]	Ammonium	H3N	H4N	1		C01342
o2[e]	O2	O2	O2	0		C00007
o2[c]	O2	O2	O2	0		C00007
octapb[e]	octanoate (protein bound)	C8H14O	C8H15O	1
octapb[c]	octanoate (protein bound)	C8H14O	C8H15O	1
orn[e]	Ornithine	C5H12N2O2	C5H13N2O2	1		C01602
orn[c]	Ornithine	C5H12N2O2	C5H13N2O2	1		C01602
pant-R[e]	(R)-Pantoate	C6H12O4	C6H11O4	-1		C00522
pant-R[c]	(R)-Pantoate	C6H12O4	C6H11O4	-1		C00522
pep[e]	Phosphoenolpyruvate	C3H5O6P	C3H2O6P	-3		C00074
pep[c]	Phosphoenolpyruvate	C3H5O6P	C3H2O6P	-3		C00074
pg160[e]	Phosphatidylglycerol (dihexadecanoyl, n-C16:0)	C38H75O10P1	C38H74O10P1	-1		C00344
pg160[c]	Phosphatidylglycerol (dihexadecanoyl, n-C16:0)	C38H75O10P1	C38H74O10P1	-1		C00344
phe-L[e]	L-Phenylalanine	C9H11NO2	C9H11NO2	0		C00079
phe-L[c]	L-Phenylalanine	C9H11NO2	C9H11NO2	0		C00079
pheme[e]	Protoheme	C34H32FeN4O4	C34H30FeN4O4	-2		C00032
pheme[c]	Protoheme	C34H32FeN4O4	C34H30FeN4O4	-2		C00032
phom[c]	O-Phospho-L-homoserine	C4H10NO6P	C4H8NO6P	-2		C01102
phpyr[e]	Phenylpyruvate	C9H8O3	C9H7O3	-1		C00166
phpyr[c]	Phenylpyruvate	C9H8O3	C9H7O3	-1		C00166
phytoe[c]	Phytoene	C40H64	C40H64	0		C05413
phytof[c]	Phytofluene	C40H62	C40H62	0		C05414
pi[e]	Phosphate	H3O4P	HO4P	-2		C00009
pi[c]	Phosphate	H3O4P	HO4P	-2		C00009
pphn[e]	Prephenate	C10H10O6	C10H8O6	-2		C00254
pphn[c]	Prephenate	C10H10O6	C10H8O6	-2		C00254
ppi[e]	Diphosphate	H4O7P2	HO7P2	-3		C00013
ppi[c]	Diphosphate	H4O7P2	HO7P2	-3		C00013
pran[c]	N-(5-Phospho-D-ribosyl)anthranilate	C12H16NO9P	C12H13NO9P	-3		C04302
prbamp[c]	1-(5-Phosphoribosyl)-AMP	C15H23N5O14P2	C15H19N5O14P2	-4		C02741
prbatp[c]	1-(5-Phosphoribosyl)-ATP	C15H25N5O20P4	C15H19N5O20P4	-6		C02739
prephytedp[c]	Prephytoene diphosphate	C40H68O7P2	C40H65O7P2	-3		C03427
prfp[c]	1-(5-Phosphoribosyl)-5-[(5-phosphoribosylamino)methylideneamino]imidazole-4-carboxamide	C15H25N5O15P2	C15H21N5O15P2	-4		C04896
prlp[c]	5-[(5-phospho-1-deoxyribulos-1-ylamino)methylideneamino]-1-(5-phosphoribosyl)imidazole-4-carboxamide	C15H25N5O15P2	C15H21N5O15P2	-4		C04916
pro-L[e]	L-Proline	C5H9NO2	C5H9NO2	0		C00148
pro-L[c]	L-Proline	C5H9NO2	C5H9NO2	0		C00148
prpp[c]	5-Phospho-alpha-D-ribose 1-diphosphate	C5H13O14P3	C5H8O14P3	-5		C00119
pydx5p[e]	Pyridoxal 5-phosphate	C8H10NO6P	C8H8NO6P	-2		C00018
pydx5p[c]	Pyridoxal 5-phosphate	C8H10NO6P	C8H8NO6P	-2		C00018
pyr[e]	Pyruvate	C3H4O3	C3H3O3	-1		C00022
pyr[c]	Pyruvate	C3H4O3	C3H3O3	-1		C00022
q8[c]	Ubiquinone-8	C49H74O4	C49H74O4	0		C00399
q8h2[e]	Ubiquinol-8	C49H76O4	C49H76O4	0		C00390
q8h2[c]	Ubiquinol-8	C49H76O4	C49H76O4	0		C00390
r5p[e]	alpha-D-Ribose 5-phosphate	C5H11O8P	C5H9O8P	-2		C00117
r5p[c]	alpha-D-Ribose 5-phosphate	C5H11O8P	C5H9O8P	-2		C00117
ru5p-D[e]	D-Ribulose 5-phosphate	C5H11O8P	C5H9O8P	-2		C00199
ru5p-D[c]	D-Ribulose 5-phosphate	C5H11O8P	C5H9O8P	-2		C00199
ser-L[e]	L-Serine	C3H7NO3	C3H7NO3	0		C00065
ser-L[c]	L-Serine	C3H7NO3	C3H7NO3	0		C00065
skm[c]	Shikimate	C7H10O5	C7H9O5	-1		C00493
skm5p[c]	Shikimate 5-phosphate	C7H11O8P	C7H8O8P	-3		C03175
sl26da[c]	N-Succinyl-LL-2,6-diaminoheptanedioate	C11H18N2O7	C11H16N2O7	-2		C04421
sl2a6o[c]	N-Succinyl-2-L-amino-6-oxoheptanedioate	C11H15NO8	C11H12NO8	-3		C04462
succ[e]	Succinate	C4H6O4	C4H4O4	-2		C00042
succ[c]	Succinate	C4H6O4	C4H4O4	-2		C00042
succoa[e]	Succinyl-CoA	C25H40N7O19P3S	C25H35N7O19P3S	-5		C00091
succoa[c]	Succinyl-CoA	C25H40N7O19P3S	C25H35N7O19P3S	-5		C00091
sufbcd[c]	SufBCD scaffold complex	H8O2S6R	H8O2S6R	0
sufbcd-2fe2s[c]	SufBCD with bound [2Fe-2S] cluster	H6O2S8Fe2R	H4O2S8Fe2R	-2
sufbcd-2fe2s2[c]	SufBCD with two bound [2Fe-2S] clusters	H4O2S10Fe4R	O2S10Fe4R	-4
sufbcd-4fe4s[c]	SufBCD with bound [4Fe-4S] cluster	H6O2S10Fe4R	H4O2S10Fe4R	-2
sufse[c]	SufSE sulfur acceptor complex	HSR	HSR	0
sufsesh[c]	SufSE with bound sulfur	HS2R	HS2R	0
thdp[e]	2,3,4,5-Tetrahydrodipicolinate	C7H9NO4	C7H7NO4	-2		C03972
thdp[c]	2,3,4,5-Tetrahydrodipicolinate	C7H9NO4	C7H7NO4	-2		C03972
thf[e]	5,6,7,8-Tetrahydrofolate	C19H23N7O6	C19H21N7O6	-2		C00101
thf[c]	5,6,7,8-Tetrahydrofolate	C19H23N7O6	C19H21N7O6	-2		C00101
thmpp[e]	Thiamine diphosphate	C12H19N4O7P2S	C12H16N4O7P2S	-2		C00068
thmpp[c]	Thiamine diphosphate	C12H19N4O7P2S	C12H17N4O7P2S	-2		C00068
thr-L[e]	L-Threonine	C4H9NO3	C4H9NO3	0		C00188
thr-L[c]	L-Threonine	C4H9NO3	C4H9NO3	0		C00188
trnaglu[e]	tRNA (Glu)	R	R	0		C01641
trnaglu[c]	tRNA (Glu)	R	R	0		C01641
trp-L[e]	L-Tryptophan	C11H12N2O2	C11H12N2O2	0		C00078
trp-L[c]	L-Tryptophan	C11H12N2O2	C11H12N2O2	0		C00078
tyr-L[e]	L-Tyrosine	C9H11NO3	C9H11NO3	0		C00082
tyr-L[c]	L-Tyrosine	C9H11NO3	C9H11NO3	0		C00082
utp[e]	UTP	C9H15N2O15P3	C9H11N2O15P3	-4		C00075
utp[c]	UTP	C9H15N2O15P3	C9H11N2O15P3	-4		C00075
val-L[e]	L-Valine	C5H11NO2	C5H11NO2	0		C00183
val-L[c]	L-Valine	C5H11NO2	C5H11NO2	0		C00183
zcarote[c]	zeta-Carotene	C40H60	C40H60	0		C05430
acg5sa[c]	N-Acetyl-L-glutamate 5-semialdehyde	C7H11NO4	C7H10NO4	-1		C01250
acg5sa[e]	N-Acetyl-L-glutamate 5-semialdehyde	C7H11NO5	C7H10NO4	-1		C01250
acorn[c]	N2-Acetyl-L-ornithine	C7H14N2O3	C7H14N2O3	0		C00437
acorn[e]	N2-Acetyl-L-ornithine	C7H14N2O3	C7H14N2O3	0		C00437

## Sheet: Genes in model
Genes	Notes	Description
fig|235572.25.peg.197	carA	Carbamoyl-phosphate synthase small chain
fig|235572.25.peg.198	carB	Carbamoyl-phosphate synthase large chain
fig|235572.25.peg.55	argF	ornithine carbamoyltransferase
fig|235572.25.peg.137	argG	argininosuccinate synthase
fig|235572.25.peg.211	metE	5 methyltetrahydropteroyltriglutamate homocysteine S methyltransferase
fig|235572.25.peg.126	prs	Ribose-phosphate pyrophosphokinase
fig|235572.25.peg.41	hisG	ATP phosphoribosyltransferase
fig|235572.25.peg.118	hisZ	ATP phosphoribosyltransferase regulatory subunit
fig|235572.25.peg.212	hisI	phosphoribosyl-ATP pyrophosphatase
fig|235572.25.peg.240	hisI	phosphoribosyl-AMP cyclohydrolase
fig|235572.25.peg.106	hisA	1-(5-phosphoribosyl)-5-[(5- phosphoribosylamino)methylideneamino] imidazole-4-carboxamide isomerase
fig|235572.25.peg.104	hisH	Imidazole-glycerol-3-phosphate synthase subunit HisH
fig|235572.25.peg.107	hisF	Imidazole-glycerol-3-phosphate synthase subunit HisF
fig|235572.25.peg.103	hisB	imidazoleglycerol-phosphate dehydratase
fig|235572.25.peg.108	hisC	histidinol-phosphate transaminase
fig|235572.25.peg.151	lysC	aspartatekinase
fig|235572.25.peg.94	thrA	homoserine dehydrogenase
fig|235572.25.peg.142	argD	Acetylornithine aminotransferase
fig|235572.25.peg.52	asd	aspartate-semialdehyde dehydrogenase
fig|235572.25.peg.236	dapA	4-hydroxy-tetrahydrodipicolinate synthase
fig|235572.25.peg.203	dapD	Tetrahydropyridine-dicarboxylate N-succinyltransferase
fig|235572.25.peg.202	dapE	Succinyl-diaminopimelate desuccinylase
fig|235572.25.peg.94	thrA	homoserine dehydrogenase
fig|235572.25.peg.109	thrB	homoserine kinase
fig|235572.25.peg.93	thrC	threonine synthase
fig|235572.25.peg.210	aroFGH	Phospho-2-dehydro-3-deoxyheptonate aldolase
fig|235572.25.peg.217	aroB	3-dehydroquinate synthase
fig|235572.25.peg.181	aroQ	3-dehydroquinate dehydratase II
fig|235572.25.peg.169	aroE	shikimate dehydrogenase (NADP(+)
fig|235572.25.peg.216	aroK	shikimate kinase 1
fig|235572.25.peg.234	aroA	3-phosphoshikimate 1-carboxyvinyltransferase
fig|235572.25.peg.227	aroC	chorismate synthase
fig|235572.25.peg.132	trpE	Anthranilate synthase, component II
fig|235572.25.peg.133	trpE	Anthranilate synthase, component I
fig|235572.25.peg.131	trpD	anthranilate phosphoribosyltransferase
fig|235572.25.peg.50	trpF	N-(5'-phosphoribosyl)anthranilate isomerase
fig|235572.25.peg.130	trpC	indole-3-glycerol-phosphate synthase
fig|235572.25.peg.146	trpA	tryptophan synthase alpha chain
fig|235572.25.peg.147	trpB	tryptophan synthase beta chain
fig|235572.25.peg.233	pheA	chorismate mutase / prephenate dehydratase
fig|235572.25.peg.65	ilvA	L-threonine dehydratase
fig|235572.25.peg.99	ilvI	Acetolactate synthase small subunit
fig|235572.25.peg.100	ilvH	Acetolactate synthase large subunit
fig|235572.25.peg.98	ilvC	ketol-acid reductoisomerase
fig|235572.25.peg.44	ilvD	Dihydroxy-acid dehydratase
fig|235572.25.peg.224	leuB	3-isopropylmalate dehydrogenase
fig|235572.25.peg.54	leuC	3-isopropylmalate dehydratase small subunit
fig|235572.25.peg.228	leucD	3-isopropylmalate dehydratase large subunit
fig|235572.25.peg.53	leuB	3-isopropylmalate dehydrogenase
fig|235572.25.peg.171	glk	glucokinase
fig|235572.25.peg.237	aceE	Pyruvate dehydrogenase E1 component
fig|235572.25.peg.238	aceF	Acetyltransferase component of pyruvate dehydrogenase complex
fig|235572.25.peg.264	sucA	2-oxoglutarate dehydrogenase E1 component
fig|235572.25.peg.263	sucB	Dihydrolipoyllysine-residue succinyltransferase component of 2-oxoglutarate dehydrogenase complex
fig|235572.25.peg.262	ipd	Dihydrolipoyl dehydrogenase
fig|235572.25.peg.172	zwf	Glucose-6-phosphate 1-dehydrogenase
fig|235572.25.peg.30	gnd	6-phosphogluconate dehydrogenase decarboxylating
fig|235572.25.peg.56	atpA	ATP synthase epsilon chain
fig|235572.25.peg.57	atpB	ATP synthase subunit beta
fig|235572.25.peg.58	atpC	ATP synthase gamma chain
fig|235572.25.peg.59	atpD	ATP synthase subunit alpha
fig|235572.25.peg.60	atpF	ATP synthase subunit b
fig|235572.25.peg.61	atpG	ATP synthase subunit c
fig|235572.25.peg.62	atpH	ATP synthase subunit a
fig|235572.25.peg.40	sufB	SufB protein
fig|235572.25.peg.37	sufC	FeS assembly ATPase SufC
fig|235572.25.peg.36	sufD	Fe-S cluster assembly protein SufD
fig|235572.25.peg.35	sufS	Cysteine desulfurase
fig|235572.25.peg.241	sufE	Cysteine desulfuration protein SufE
fig|235572.25.peg.251	cyoC	Cytochrome O ubiquinol oxidase subunit I
fig|235572.25.peg.252	cyoD	Cytochrome O ubiquinol oxidase subunit II
fig|235572.25.peg.250	cyoA	Cytochrome O ubiquinol oxidase subunit III
fig|235572.25.peg.249	cyoB	Cytochrome O ubiquinol oxidase subunit IV
fig|235572.25.peg.74	nuoA	NADH-quinone oxidoreductase subunit
fig|235572.25.peg.75	nuoB	NADH-quinone oxidoreductase subunit B
fig|235572.25.peg.76	nuoC	NADH-quinone oxidoreductase subunit D
fig|235572.25.peg.77	nuoN	NADH-quinone oxidoreductase subunit N
fig|235572.25.peg.78	nuoE	NADH-quinone oxidoreductase subunit E protein
fig|235572.25.peg.79	nuoF	NADH dehydrogenase subunit F
fig|235572.25.peg.80	nuoG	NADH-quinone oxidoreductase
fig|235572.25.peg.81	nuoH	NADH-quinone oxidoreductase subunit H
fig|235572.25.peg.82	nuoI	NADH-quinone oxidoreductase subunit I
fig|235572.25.peg.83	nuoJ	ADH-ubiquinone oxidoreductase chain J
fig|235572.25.peg.84	nuoK	NADH-quinone oxidoreductase subunit K
fig|235572.25.peg.85	nuoL	NADH-quinone oxidoreductase, L subunit
fig|235572.25.peg.86	nuoM	NADH-quinone oxidoreductase chain m
fig|235572.25.peg.123	crtB	phytoene synthase
fig|235572.25.peg.122	crtI	Phytoene dehydrogenase (Phytoene desaturase)
fig|235572.25.peg.265	cyoD	Glutamyl-tRNA synthetase
fig|235572.25.peg.248	cyoE	Heme O synthase
fig|235572.25.peg.153	lipA	Lipoyl synthase
fig|235572.25.peg.178	metF	Methylenetetrahydrofolate reductase
fig|235572.25.peg.160	clsA	Cardiolipin synthase A
