# Supplementary material for: In silico prediction of candidate gene targets for the management of African cassava whitefly (Bemisia tabaci, SSA1-SG1), a key vector of viruses causing cassava brown streak disease
Source: PeerJ. 2024 Feb 23;12:e16949. doi: 10.7717/peerj.16949 (PMC10896082; doi:10.7717/peerj.16949)
Supplement: Supplemental Information 5 [file peerj-12-16949-s005.xlsx]

## Sheet: Reaction List
Abbreviation	Description	Reaction	GPR	Genes	Proteins	Subsystem	Reversible	Lower bound	Upper bound	Objective	Confidence Score	EC Number	Notes	References
SSA1-Por_CBPS	carbamoyl-phosphate synthase (glutamine-hydrolysing)	2 atp[p] + gln-L[p] + h2o[p] + hco3[p] => 2 adp[p] + cbp[p] + glu-L[p] + 2 h[p] + pi[p]	fig|235572.25.peg.197 and fig|235572.25.peg.198	fig|235572.25.peg.197 fig|235572.25.peg.198		Arginine Biosynthesis I	0	0	1000	0	2	6.3.5.5	carAB
SSA1-Por_OCBT	ornithine carbamoyltransferase	cbp[p] + orn[p] => citr-L[p] + h[p] + pi[p]	fig|235572.25.peg.55	fig|235572.25.peg.55		Arginine Biosynthesis I	0	0	1000	0	2	2.1.3.3	argF
SSA1-Por_ARGSS	argininosuccinate synthase	asp-L[p] + atp[p] + citr-L[p] => amp[p] + argsuc[p] + h[p] + ppi[p]	fig|235572.25.peg.137	fig|235572.25.peg.137		Arginine Biosynthesis I	0	0.082103	1000	0	2	6.3.4.5	argG
SSA1-Por_METS	methionine synthase	5mthf[p] + hcys-L[p] => h[p] + met-L[p] + thf[p]	fig|235572.25.peg.211	fig|235572.25.peg.211		Methionine Biosynthesis	0	0	0.0569756	0	2	2.1.1.14	metE
SSA1-Por_PRPPS	phosphoribosylpyrophosphate synthetase	atp[p] + r5p[p] => amp[p] + h[p] + prpp[p]	fig|235572.25.peg.126	fig|235572.25.peg.126		Histidine Biosynthesis	0	0	1000	0	2	2.7.6.1	prs
SSA1-Por_ATPPRT	ATP phosphoribosyltransferase	atp[p] + prpp[p] => ppi[p] + prbatp[p]	fig|235572.25.peg.41 and fig|235572.25.peg.118	fig|235572.25.peg.41 fig|235572.25.peg.118		Histidine Biosynthesis	0	0	1000	0	2	2.4.2.17	hisGZ
SSA1-Por_PRATPP	phosphoribosyl-ATP pyrophosphatase	h2o[p] + prbatp[p] => h[p] + ppi[p] + prbamp[p]	fig|235572.25.peg.212	fig|235572.25.peg.212		Histidine Biosynthesis	0	0	1000	0	2	3.6.1.31	hisI
SSA1-Por_PRAMPC	phosphoribosyl-AMP cyclohydrolase	h2o[p] + prbamp[p] => prfp[p]	fig|235572.25.peg.240	fig|235572.25.peg.240		Histidine Biosynthesis	0	0	1000	0	2	3.5.4.19	hisI
SSA1-Por_PRMICI	1-(5-phosphoribosyl)-5-[(5-phosphoribosylamino)methylideneamino)imidazole-4-carboxamide isomerase	prfp[p] => prlp[p]	fig|235572.25.peg.106	fig|235572.25.peg.106		Histidine Biosynthesis	0	0	1000	0	2	5.3.1.16	hisA
SSA1-Por_IG3PS	Imidazole-glycerol-3-phosphate synthase	gln-L[p] + prlp[p] => aicar[p] + eig3p[p] + glu-L[p] + h[p]	fig|235572.25.peg.104 and fig|235572.25.peg.107	fig|235572.25.peg.104 fig|235572.25.peg.107		Histidine Biosynthesis	0	0	1000	0	2	2.4.2.-	hisHF
SSA1-Por_IGPDH	imidazoleglycerol-phosphate dehydratase	eig3p[p] => h2o[p] + imacp[p]	fig|235572.25.peg.103	fig|235572.25.peg.103		Histidine Biosynthesis	0	0	1000	0	2	4.2.1.19	hisB
SSA1-Por_HSTPT	histidinol-phosphate transaminase	glu-L[p] + imacp[p] => akg[p] + hisp[p]	fig|235572.25.peg.108	fig|235572.25.peg.108		Histidine Biosynthesis	0	0	1000	0	2	2.6.1.9	hisC
SSA1-Por_ASPK	aspartate kinase	asp-L[p] + atp[p] => 4pasp[p] + adp[p]	fig|235572.25.peg.151 or fig|235572.25.peg.94	fig|235572.25.peg.151 fig|235572.25.peg.94		Lysine Biosynthesis I	0	0	1000	0	2	2.7.2.4	lysC thrA
SSA1-Por_ASAD	aspartate-semialdehyde dehydrogenase	4pasp[p] + h[p] + nadph[p] => aspsa[p] + nadp[p] + pi[p]	fig|235572.25.peg.52	fig|235572.25.peg.52		Lysine Biosynthesis I	0	0	1000	0	2	1.2.1.11	asd
SSA1-Por_DHDPS	4-hydroxy-tetrahydrodipicolinate synthase	aspsa[p] + pyr[p] => 23dhdp[p] + h[p] + 2 h2o[p]	fig|235572.25.peg.236	fig|235572.25.peg.236		Lysine Biosynthesis I	0	0	1000	0	2	4.3.3.7	dapA
SSA1-Por_THDPS	tetrahydrodipicolinate succinylase	h2o[p] + succoa[p] + thdp[p] => coa[p] + sl2a6o[p]	fig|235572.25.peg.203	fig|235572.25.peg.203		Lysine Biosynthesis I	0	0	1000	0	2	2.3.1.117	dapD
SSA1-Por_SDPTA	succinyldiaminopimelate transaminase	glu-L[p] + sl2a6o[p] <=> akg[p] + sl26da[p]	fig|235572.25.peg.142	fig|235572.25.peg.142		Lysine Biosynthesis I	1	-1000	1000	0	2	2.6.1.17	argD
SSA1-Por_SDPDS	succinyl-diaminopimelate desuccinylase	h2o[p] + sl26da[p] => 26dap-LL[p] + succ[p]	fig|235572.25.peg.202	fig|235572.25.peg.202		Lysine Biosynthesis I	0	0	1000	0	2	3.5.1.18	dapE
SSA1-Por_HSD	homoserine dehydrogenase (NADPH)	aspsa[p] + h[p] + nadph[p] <=> hom-L[p] + nadp[p]	fig|235572.25.peg.94	fig|235572.25.peg.94		Threonine Biosynthesis	1	-1000	1000	0	2	1.1.1.3	thrA
SSA1-Por_HSK	homoserine kinase	atp[p] + hom-L[p] => adp[p] + h[p] + phom[p]	fig|235572.25.peg.109	fig|235572.25.peg.109		Threonine Biosynthesis	0	0	1000	0	2	2.7.1.39	thrB
SSA1-Por_THRS	threonine synthase	h2o[p] + phom[p] => pi[p] + thr-L[p]	fig|235572.25.peg.93	fig|235572.25.peg.93		Threonine Biosynthesis	0	0	0.100596	0	2	4.2.3.1	thrC
SSA1-Por_DDPA	3-deoxy-D-arabino-heptulosonate 7-phosphate synthetase	e4p[p] + h2o[p] + pep[p] => 2dda7p[p] + pi[p]	fig|235572.25.peg.210	fig|235572.25.peg.210		Chorismate Biosynthesis I	0	0	1000	0	2	2.5.1.54	aroFGH
SSA1-Por_DHQS	3-dehydroquinate synthase	2dda7p[p] => 3dhq[p] + pi[p]	fig|235572.25.peg.217	fig|235572.25.peg.217		Chorismate Biosynthesis I	0	0	1000	0	2	4.2.3.4	aroB
SSA1-Por_DHQTi	3-dehydroquinate dehydratase, irreversible	3dhq[p] => 3dhsk[p] + h2o[p]	fig|235572.25.peg.181	fig|235572.25.peg.181		Chorismate Biosynthesis I	0	0	1000	0	2	4.2.1.10	aroQ
SSA1-Por_SHK3Dr	shikimate dehydrogenase	3dhsk[p] + h[p] + nadph[p] <=> nadp[p] + skm[p]	fig|235572.25.peg.169	fig|235572.25.peg.169		Chorismate Biosynthesis I	1	-1000	1000	0	2	1.1.1.25	aroE
SSA1-Por_SHKK	shikimate kinase	atp[p] + skm[p] => adp[p] + h[p] + skm5p[p]	fig|235572.25.peg.216	fig|235572.25.peg.216		Chorismate Biosynthesis I	0	0	1000	0	2	2.7.1.71	aroK
SSA1-Por_PSCVT	3-phosphoshikimate 1-carboxyvinyltransferase	pep[p] + skm5p[p] <=> 3psme[p] + pi[p]	fig|235572.25.peg.234	fig|235572.25.peg.234		Chorismate Biosynthesis I	1	-1000	1000	0	2	2.5.1.19	aroA
SSA1-Por_CHORS	chorismate synthase	3psme[p] => chor[p] + pi[p]	fig|235572.25.peg.227	fig|235572.25.peg.227		Chorismate Biosynthesis I	0	0	1000	0	2	4.2.3.5	aroC
SSA1-Por_ANS	anthranilate synthase	chor[p] + gln-L[p] => anth[p] + glu-L[p] + h[p] + pyr[p]	(fig|235572.25.peg.132 and fig|235572.25.peg.133)	fig|235572.25.peg.132 fig|235572.25.peg.133		Tryptophan Biosynthesis	0	0	1000	0	2	4.1.3.27	trpE
SSA1-Por_ANPRT	anthranilate phosphoribosyltransferase	anth[p] + prpp[p] => ppi[p] + pran[p]	fig|235572.25.peg.131	fig|235572.25.peg.131		Tryptophan Biosynthesis	0	0	1000	0	2	2.4.2.18	trpD
SSA1-Por_PRAIi	phosphoribosylanthranilate isomerase (irreversible)	pran[p] => 2cpr5p[p]	fig|235572.25.peg.50	fig|235572.25.peg.50		Tryptophan Biosynthesis	0	0	1000	0	2	5.3.1.24	trpF
SSA1-Por_IGPS	indole-3-glycerol-phosphate synthase	2cpr5p[p] + h[p] => 3ig3p[p] + co2[p] + h2o[p]	fig|235572.25.peg.130	fig|235572.25.peg.130		Tryptophan Biosynthesis	0	0	1000	0	2	4.1.1.48	trpC
SSA1-Por_TRPS3	tryptophan synthase (indoleglycerol phosphate)	3ig3p[p] => g3p[p] + indole[p]	(fig|235572.25.peg.146 and fig|235572.25.peg.147)	fig|235572.25.peg.146 fig|235572.25.peg.147		Tryptophan Biosynthesis	0	0	1000	0	2	4.2.1.20	trpAB
SSA1-Por_TRPS1	tryptophan synthase (indoleglycerol phosphate)	3ig3p[p] + ser-L[p] => g3p[p] + h2o[p] + trp-L[p]	(fig|235572.25.peg.146 and fig|235572.25.peg.147)	fig|235572.25.peg.146 fig|235572.25.peg.147		Tryptophan Biosynthesis	0	0	1000	0	2	4.2.1.20	trpAB
SSA1-Por_TRPS2	tryptophan synthase (indole)	indole[p] + ser-L[p] => h2o[p] + trp-L[p]	(fig|235572.25.peg.146 and fig|235572.25.peg.147)	fig|235572.25.peg.146 fig|235572.25.peg.147		Tryptophan Biosynthesis	0	0	1000	0	2	4.2.1.20	trpAB
SSA1-Por_CHORM	chorismate mutase	chor[p] => pphn[p]	fig|235572.25.peg.233	fig|235572.25.peg.233		Phenylalanine Biosynthesis	0	0	1000	0	2	5.4.99.5	pheA
SSA1-Por_PPNDH	prephenate dehydratase	h[p] + pphn[p] => co2[p] + h2o[p] + phpyr[p]	fig|235572.25.peg.233	fig|235572.25.peg.233		Phenylalanine Biosynthesis	0	0	1000	0	2	4.2.1.51	pheA
SSA1-Por_THRD_L	L-threonine deaminase	thr-L[p] => 2obut[p] + nh4[p]	fig|235572.25.peg.65	fig|235572.25.peg.65		Isoleucine Biosynthesis	0	0	1000	0	2	4.3.1.19	ilvA
SSA1-Por_ACHBS	2-aceto-2-hydroxybutanoate synthase	2obut[p] + h[p] + pyr[p] => 2ahbut[p] + co2[p]	(fig|235572.25.peg.99 and fig|235572.25.peg.100)	fig|235572.25.peg.99 fig|235572.25.peg.100		Isoleucine Biosynthesis	0	0	1000	0	2	2.2.1.6	ilvHI
SSA1-Por_KARA2	ketol-acid reductoisomerase (2-Acetolactate)	2ahbut[p] + h[p] + nadph[p] <=> 23dhmp[p] + nadp[p]	fig|235572.25.peg.98	fig|235572.25.peg.98		Isoleucine Biosynthesis	1	-1000	1000	0	2	1.1.1.86	ilvC
SSA1-Por_DHAD2	Dihydroxy-acid dehydratase (2,3-dihydroxy-3-methylpentanoate)	23dhmp[p] => 3mop[p] + h2o[p]	fig|235572.25.peg.44	fig|235572.25.peg.44		Isoleucine Biosynthesis	0	0	1000	0	2	4.2.1.9	ilvD
SSA1-Por_ACLS	acetolactate synthase	h[p] + 2 pyr[p] => alac-S[p] + co2[p]	(fig|235572.25.peg.99 and fig|235572.25.peg.100)	fig|235572.25.peg.99 fig|235572.25.peg.100		Valine Biosynthesis	0	0	1000	0	2	2.2.1.6	ilvHI
SSA1-Por_KARA1	ketol-acid reductoisomerase (2,3-dihydroxy-3-methylbutanoate)	alac-S[p] + h[p] + nadph[p] <=> 23dhmb[p] + nadp[p]	fig|235572.25.peg.98	fig|235572.25.peg.98		Valine Biosynthesis	1	-1000	1000	0	2	1.1.1.86	ilvC
SSA1-Por_DHAD1	dihydroxy-acid dehydratase (2,3-dihydroxy-3-methylbutanoate)	23dhmb[p] => 3mob[p] + h2o[p]	fig|235572.25.peg.44	fig|235572.25.peg.44		Valine Biosynthesis	0	0	1000	0	2	4.2.1.9	ilvD
SSA1-Por_IPPS	2-isopropylmalate synthase	3mob[p] + accoa[p] + h2o[p] => 3c3hmp[p] + coa[p] + h[p]	fig|235572.25.peg.224	fig|235572.25.peg.224		Leucine Biosynthesis	0	0	1000	0	2	2.3.3.13	leuA
SSA1-Por_IPPMIb	2-isopropylmalate hydratase	3c3hmp[p] <=> 2ippm[p] + h2o[p]	(fig|235572.25.peg.54 and fig|235572.25.peg.228)	fig|235572.25.peg.54 fig|235572.25.peg.228		Leucine Biosynthesis	1	-1000	1000	0	2	4.2.1.33	leuCD
SSA1-Por_IPPMIa	3-isopropylmalate dehydratase	2ippm[p] + h2o[p] <=> 3c2hmp[p]	(fig|235572.25.peg.54 and fig|235572.25.peg.228)	fig|235572.25.peg.54 fig|235572.25.peg.228		Leucine Biosynthesis	1	-1000	1000	0	2	4.2.1.33	leuCD
SSA1-Por_IPMD	3-isopropylmalate dehydrogenase	3c2hmp[p] + nad[p] => 3c4mop[p] + h[p] + nadh[p]	fig|235572.25.peg.53	fig|235572.25.peg.53		Leucine Biosynthesis	0	0	1000	0	2	1.1.1.85	leuB
SSA1-Por_OMCDC	2-Oxo-4-methyl-3-carboxypentanoate decarboxylation	3c4mop[p] + h[p] => 4mop[p] + co2[p]	fig|235572.25.peg.53	fig|235572.25.peg.53		Leucine Biosynthesis	0	0	1000	0	2	1.1.1.85	spontaneous
SSA1-Por_HEX1	glucokinase	atp[p] + glc-D[p] => adp[p] + g6p[p] + h[p]	fig|235572.25.peg.171	fig|235572.25.peg.171		Glycolysis	0	0	1000	0	2	2.7.1.1	glk
SSA1-Por_PDH	pyruvate dehydrogenase	coa[p] + nad[p] + pyr[p] => accoa[p] + co2[p] + nadh[p]	(fig|235572.25.peg.237 and fig|235572.25.peg.238 and fig|235572.25.peg.262)	fig|235572.25.peg.237 fig|235572.25.peg.238 fig|235572.25.peg.262		Glycolysis	0	0	1000	0	2	1.2.1.-	aceEF lpd
SSA1-Por_AKGDH	2-Oxoglutarate dehydrogenase	akg[p] + coa[p] + nad[p] => co2[p] + nadh[p] + succoa[p]	(fig|235572.25.peg.264 and fig|235572.25.peg.263 and fig|235572.25.peg.262)	fig|235572.25.peg.264 fig|235572.25.peg.263 fig|235572.25.peg.262		Citric Acid Cycle	0	0	1000	0	2		sucAB lpd
SSA1-Por_G6PDH2	glucose 6-phosphate dehydrogenase	g6p[p] + nadp[p] => 6pgl[p] + h[p] + nadph[p]	fig|235572.25.peg.172	fig|235572.25.peg.172		Pentose Phosphate Pathway	0	0	1000	0	2	1.1.1.49	zwf
SSA1-Por_GND	phosphogluconate dehydrogenase	6pgc[p] + nadp[p] => co2[p] + nadph[p] + ru5p-D[p]	fig|235572.25.peg.30	fig|235572.25.peg.30		Pentose Phosphate Pathway	0	0	1000	0	2	1.1.1.44	gnd
SSA1-Por_ATPS4rpp	ATP synthase (four protons for one ATP) (periplasm)	adp[p] + pi[p] + 4 h[c] <=> atp[p] + 3 h[p] + h2o[p]	(fig|235572.25.peg.56 and fig|235572.25.peg.57 and fig|235572.25.peg.58 and fig|235572.25.peg.59)	fig|235572.25.peg.56 fig|235572.25.peg.57 fig|235572.25.peg.58 fig|235572.25.peg.59		Oxidative Phosphorylation	1	-1000	1000	0	2	3.6.3.14	atpABCDEFGH
SSA1-Por_CYTBO3_4pp	cytochrome oxidase bo3 (ubiquinol-8: 4 protons) (periplasm)	4 h[p] + 0.5 o2[p] + q8h2[p] => h2o[p] + q8[p] + 4 h[c]	(fig|235572.25.peg.249 and fig|235572.25.peg.250 and fig|235572.25.peg.251 and fig|235572.25.peg.252)	fig|235572.25.peg.249 fig|235572.25.peg.250 fig|235572.25.peg.251 fig|235572.25.peg.252		Oxidative Phosphorylation	0	0	1000	0	2		cyoABCDE
SSA1-Por_NADH16pp	NADH dehydrogenase (ubiquinone-8 & 3 protons) (periplasm)	4 h[p] + nadh[p] + q8[p] => nad[p] + q8h2[p] + 3 h[c]	(fig|235572.25.peg.74 and fig|235572.25.peg.75 and fig|235572.25.peg.76 and fig|235572.25.peg.77 and fig|235572.25.peg.78 and fig|235572.25.peg.79 and fig|235572.25.peg.80 and fig|235572.25.peg.81 and fig|235572.25.peg.82 and fig|235572.25.peg.83 and fig|235572.25.peg.84 and fig|235572.25.peg.85 and fig|235572.25.peg.86)	fig|235572.25.peg.74 fig|235572.25.peg.75 fig|235572.25.peg.76 fig|235572.25.peg.77 fig|235572.25.peg.78 fig|235572.25.peg.79 fig|235572.25.peg.80 fig|235572.25.peg.81 fig|235572.25.peg.82 fig|235572.25.peg.83 fig|235572.25.peg.84 fig|235572.25.peg.85 fig|235572.25.peg.86		Oxidative Phosphorylation	0	0	1000	0	2	1.6.5.3	nuoABCEFGHIJKLMN
SSA1-Por_PSY1	phytoene synthase (1)	2 ggdp[p] => ppi[p] + prephytedp[p]	fig|235572.25.peg.123	fig|235572.25.peg.123		Carotenoid biosynthesis	0	0	1000	0	2	2.5.1.32	crtB
SSA1-Por_PSY2	phytoene synthase (2)	prephytedp[p] => ppi[p] + phytoe[p]	fig|235572.25.peg.123	fig|235572.25.peg.123		Carotenoid biosynthesis	0	0	1000	0	2	2.5.1.32	crtB
SSA1-Por_PDS1	phytoene desaturase (1)	nadp[p] + phytoe[p] => h[p] + nadph[p] + phytof[p]	fig|235572.25.peg.122	fig|235572.25.peg.122		Carotenoid biosynthesis	0	0	1000	0	2	1.3.99.31	crtI
SSA1-Por_PDS2	phytoene desaturase (2)	nadp[p] + phytof[p] => h[p] + nadph[p] + zcarote[p]	fig|235572.25.peg.122	fig|235572.25.peg.122		Carotenoid biosynthesis	0	0	1000	0	2	1.3.99.31	crtI
SSA1-Por_ZCAROTDH1	zeta-carotene desaturase (1)	h[p] + o2[p] + nadph[p] + zcarote[p] => 2 h2o[p] + nadp[p] + neuspn[p]	fig|235572.25.peg.122	fig|235572.25.peg.122		Carotenoid Biosynthesis	0	0	1000	0	2	1.3.99.31	crtI
SSA1-Por_ZCAROTDH2	zeta-carotene desaturase(2)	h[p] + o2[p] + nadph[p] + neuspn[p] => 2 h2o[p] + nadp[p] + lycop[p]	fig|235572.25.peg.122	fig|235572.25.peg.122		Carotenoid Biosynthesis	0	0	1000	0	2	1.3.99.31	crtI
SSA1-Por_LCYBZC	lycopene cyclase (beta-zeacarotene producing)	neuspn[p] => bzcarote[p]	fig|235572.25.peg.122	fig|235572.25.peg.122		Carotenoid biosynthesis	0	0	1000	0	2	5.5.1.19	crtY
SSA1-Por_GLUTRS	Glutamyl-tRNA synthetase	atp[p] + glu-L[p] + trnaglu[p] => amp[p] + glutrna[p] + ppi[p]	fig|235572.25.peg.265	fig|235572.25.peg.265		Heme Biosynthesis	0	0	1000	0		6.1.1.17	gltX
SSA1-Por_HEMEOS	Heme O synthase	frdp[p] + h2o[p] + pheme[p] => hemeO[p] + ppi[p]	fig|235572.25.peg.248	fig|235572.25.peg.248		Heme Biosynthesis	0	0	1000	0	2		cyoE
SSA1-Por_LIPOS	Lipoate synthase	4fe4s[p] + 2 amet[p] + h[p] + nad[p] + octapb[p] => 2fe2s[p] + 2 dad-5[p] + 2 fe2[p] + lipopb[p] + 2 met-L[p] + nadh[p]	fig|235572.25.peg.153	fig|235572.25.peg.153		Lipoate Biosynthesis and Incorporation I	0	0	1000	0	2	2.8.1.8	lipA
SSA1-Por_MTHFR2	5,10-methylenetetrahydrofolate reductase (NADH)	2 h[p] + mlthf[p] + nadh[p] => 5mthf[p] + nad[p]	fig|235572.25.peg.178	fig|235572.25.peg.178		Folate Metabolism	0	0	1000	0	2	1.5.1.20	metF
SSA1-Por_SCYSDS	SUF Cysteine desulfuration	cys-L[p] + sufse[p] => ala-L[p] + sufsesh[p]	fig|235572.25.peg.35	fig|235572.25.peg.35		Cofactor and Prosthetic Group Biosynthesis	0	0	1000	0	2		sufES
SSA1-Por_S2FE2SR	SUF [2Fe-2S] regeneration	2fe1s[p] + atp[p] + h2o[p] + sufbcd[p] + sufsesh[p] => adp[p] + 5 h[p] + pi[p] + sufbcd-2fe2s[p] + sufse[p]	(fig|235572.25.peg.40 and fig|235572.25.peg.37 and fig|235572.25.peg.36 and fig|235572.25.peg.241 and fig|235572.25.peg.35)	fig|235572.25.peg.40 fig|235572.25.peg.37 fig|235572.25.peg.36 fig|235572.25.peg.241 fig|235572.25.peg.35		Cofactor and Prosthetic Group Biosynthesis	0	0	1000	0	2		sufBCDSE
SSA1-Por_S4FE4SR	SUF [4Fe-4S] Reduction	fadh2[p] + 2 h[p] + sufbcd-2fe2s2[p] => fad[p] + sufbcd-4fe4s[p]	(fig|235572.25.peg.40 and fig|235572.25.peg.37 and fig|235572.25.peg.36)	fig|235572.25.peg.40 fig|235572.25.peg.37 fig|235572.25.peg.36		Cofactor and Prosthetic Group Biosynthesis	0	0	1000	0	2		sufBCD
SSA1-Por_S2FE2SS	SUF [2Fe-2S] Synthesis	atp[p] + fadh2[p] + 2 fe2[p] + h2o[p] + sufbcd[p] + 2 sufsesh[p] => adp[p] + fad[p] + 7 h[p] + pi[p] + sufbcd-2fe2s[p] + 2 sufse[p]	(fig|235572.25.peg.40 and fig|235572.25.peg.37 and fig|235572.25.peg.36 and fig|235572.25.peg.241 and fig|235572.25.peg.35)	fig|235572.25.peg.40 fig|235572.25.peg.37 fig|235572.25.peg.36 fig|235572.25.peg.241 fig|235572.25.peg.35		Cofactor and Prosthetic Group Biosynthesis	0	0	1000	0	2		sufBCDSE
SSA1-Por_S2FE2SS2	SUF [2Fe-2S] Synthesis II	atp[p] + fadh2[p] + 2 fe2[p] + h2o[p] + sufbcd-2fe2s[p] + 2 sufsesh[p] => adp[p] + fad[p] + 7 h[p] + pi[p] + sufbcd-2fe2s2[p] + 2 sufse[p]	(fig|235572.25.peg.40 and fig|235572.25.peg.37 and fig|235572.25.peg.36 and fig|235572.25.peg.241 and fig|235572.25.peg.35)	fig|235572.25.peg.40 fig|235572.25.peg.37 fig|235572.25.peg.36 fig|235572.25.peg.241 fig|235572.25.peg.35		Cofactor and Prosthetic Group Biosynthesis	0	0	1000	0	2		sufBCDSE
SSA1-Por_S4FE4ST	SUF [4Fe-4S] Transfer	4 h[p] + sufbcd-4fe4s[p] => 4fe4s[p] + sufbcd[p]	(fig|235572.25.peg.40 and fig|235572.25.peg.37 and fig|235572.25.peg.36)	fig|235572.25.peg.40 fig|235572.25.peg.37 fig|235572.25.peg.36		Cofactor and Prosthetic Group Biosynthesis	0	0	1000	0	2		sufABCD
SSA1-Por_DPR	2-dehydropantoate 2-reductase	2dhp[p] + h[p] + nadph[p] => nadp[p] + pant-R[p]	fig|235572.25.peg.98	fig|235572.25.peg.98		Phosphopantothenate biosynthesis I	0	0	1000	0	2	1.1.1.169	ilvC
SSA1-Por_CLPNS160pp	cardiolipin synthase (periplasmic, n-C16:0)	2 pg160[p] <=> clpn160[p] + glyc[p]	fig|235572.25.peg.160	fig|235572.25.peg.160		Cardiolipin Biosynthesis I	1	-1000	1000	0	2	2.7.8.-	clsA
P_GROW	Biomass objective function	0.3208 ala-L[p] + 0.21594 arg-L[p] + 0.27238 asn-L[p] + 0.28334 asp-L[p] + 0.03231 cys-L[p] + 0.1607 gln-L[p] + 0.37901 glu-L[p] + 0.32163 gly[p] + 0.082 his-L[p] + 0.43019 ile-L[p] + 0.42814 leu-L[p] + 0.43881 lys-L[p] + 0.14595 met-L[p] + 0.15598 phe-L[p] + 0.15415 pro-L[p] + 0.32982 ser-L[p] + 0.25236 thr-L[p] + 0.03107 trp-L[p] + 0.12909 tyr-L[p] + 0.36104 val-L[p] + 0.03667 datp[p] + 0.01303…				Biomass	0	0.0493294	1000	0	2
SSA1-Por_DM_4FE4S	Source to allow [4Fe-4S] iron-sulfur cluster to enter system	=> 4fe4s[p]				Source	0	0	1000	0	2
SSA1-Por_DM_SUFSE	Source to allow SUFSE to enter system	=> sufse[p]				Source	0	0	1000	0	2
SSA1-Por_DM_SUFSESH	Sink to allow SUFSESH to leave system	sufsesh[p] =>				Sink	0	0	1000	0	2
SSA1-Por_DM_LIPOPB	Sink to allow lipoate to leave system	lipopb[p] =>				Sink	0	0	1000	0	2
SSA1-Por_DM_GLYC	Sink to allow Glycerol to leave system	glyc[p] =>				Sink	0	0	1000	0	2
SSA1-Por_O2tex	oxygen transport via diffusion	o2[c] <=> o2[p]				Transport	1	-1000	1000	0	2
SSA1-Por_H2Otex	H2O transport via diffusion	h2o[c] <=> h2o[p]				Transport	1	-1000	1000	0	2
SSA1-Por_CO2tcy	CO2 transport via diffusion	co2[p] <=> co2[c]				Transport	1	-1000	1000	0	2
SSA1-Por_FE2tex	iron (II) transport via diffusion	fe2[c] <=> fe2[p]				Transport	1	-1000	1000	0	2
SSA1-Por_Htex	H transport by diffusion	h[p] <=> h[c]				Transport	1	-1000	1000	0	2
SSA1-Por_Pitex	Phosphate transport by diffusion	pi[p] <=> pi[c]				Transport	1	-1000	1000	0	2
SSA1-Por_UP_Q8H2	Import Ubiquinol-8	q8h2[c] => q8h2[p]				Transport	0	0	1000	0	2
SSA1-Por_UP_HCO3	Import HCO3	hco3[c] => hco3[p]				Transport	0	0	1000	0	2
SSA1-Por_UP_6PGC	Import 6-Phospho-D-gluconate	6pgc[c] => 6pgc[p]				Transport	0	0	1000	0	2
SSA1-Por_UP_2DHP	Import 2-Dehydropantoate	2dhp[c] => 2dhp[p]				Transport	0	0	1000	0	2
SSA1-Por_UP_PYR	Import Pyruvate	pyr[c] => pyr[p]				Transport	0	0	1000	0	2
SSA1-Por_UP_PPHN	Import Prephenate	pphn[c] => pphn[p]				Transport	0	0	1000	0	2
SSA1-Por_UP_2OBUT	Import 2-Oxobutanoate	2obut[c] => 2obut[p]				Transport	0	0	1000	0	2
SSA1-Por_UP_E4P	Import D-Erythrose 4-phosphate	e4p[c] => e4p[p]				Transport	0	0	1000	0	2
SSA1-Por_UP_PEP	Import Phosphoenolpyruvate	pep[c] => pep[p]				Transport	0	0	1000	0	2
SSA1-Por_UP_R5P	Import alpha-D-Ribose 5-phosphate	r5p[c] => r5p[p]				Transport	0	0	1000	0	2
SSA1-Por_UP_PG160	Import Phosphatidylglycerol (didodecanoyl, n-C12:0)	pg160[c] => pg160[p]				Transport	0	0	1000	0	2
SSA1-Por_UP_GGDP	Import Geranylgeranyl diphosphate	ggdp[c] => ggdp[p]				Transport	0	0	1000	0	2
SSA1-Por_UP_GLC-D	Import D-Glucose	glc-D[c] => glc-D[p]				Transport	0	0	1000	0	2
SSA1-Por_UP_FRDP	Import Farnesyl diphosphate	frdp[c] => frdp[p]				Transport	0	0	1000	0	2
SSA1-Por_UP_TRNAGLU	Import tRNA (Glu)	trnaglu[c] => trnaglu[p]				Transport	0	0	1000	0	2
SSA1-Por_UP_OCTAPB	Import octanoate (protein bound)	octapb[c] => octapb[p]				Transport	0	0	1000	0	2
SSA1-Por_UP_FADH2	Import FADH2	fadh2[c] => fadh2[p]				Transport	0	0	1000	0	2
SSA1-Por_UP_PYDX5P	Import Pyridoxal 5'-phosphate	pydx5p[c] => pydx5p[p]				Transport	0	0	1000	0	2
SSA1-Por_UP_THMPP	Import Thiamine diphosphate	thmpp[c] => thmpp[p]				Transport	0	0	1000	0	2
SSA1-Por_UP_FMNH2	Import Reduced FMN	fmnh2[c] => fmnh2[p]				Transport	0	0	1000	0	2
SSA1-Por_UP_THDP	Import 2,3,4,5-Tetrahydrodipicolinate	thdp[c] => thdp[p]				Transport	0	0	1000	0	2
SSA1-Por_UP_MLTHF	Import 5,10-Methylenetetrahydrofolate	mlthf[c] => mlthf[p]				Transport	0	0	1000	0	2
SSA1-Por_UP_COA	Import Coenzyme A	coa[c] => coa[p]				Transport	0	0	1000	0	2
SSA1-Por_UP_PHEME	Import Protoheme	pheme[c] => pheme[p]				Transport	0	0	1000	0	2
SSA1-Por_UP_NADP	Import NADP	nadp[c] => nadp[p]				Transport	0	0	1000	0	2
SSA1-Por_UP_NADH	Import NADH	nadh[c] => nadh[p]				Transport	0	0	1000	0	2
SSA1-Por_UP_DATP	Import dATP	datp[c] => datp[p]				Transport	0	0	1000	0	2
SSA1-Por_UP_DCTP	Import dCTP	dctp[c] => dctp[p]				Transport	0	0	1000	0	2
SSA1-Por_UP_DGTP	Import dGTP	dgtp[c] => dgtp[p]				Transport	0	0	1000	0	2
SSA1-Por_UP_DTTP	Import dTTP	dttp[c] => dttp[p]				Transport	0	0	1000	0	2
SSA1-Por_UP_ADP	Import ADP	adp[c] => adp[p]				Transport	0	0	1000	0	2
SSA1-Por_UP_CTP	Import CTP	ctp[c] => ctp[p]				Transport	0	0	1000	0	2
SSA1-Por_UP_GTP	Import GTP	gtp[c] => gtp[p]				Transport	0	0	1000	0	2
SSA1-Por_UP_UTP	Import UTP	utp[c] => utp[p]				Transport	0	0	1000	0	2
SSA1-Por_UP_AMET	Import S-Adenosyl-L-methionine	amet[c] => amet[p]				Transport	0	0	1000	0	2
SSA1-Por_UP_HCYS-L	Import L-Homocysteine	hcys-L[c] => hcys-L[p]				Transport	0	0	1000	0	2
SSA1-Por_UP_ORN	Import Ornithine	orn[c] => orn[p]				Transport	0	0	1000	0	2
SSA1-Por_UP_CBP	Import Carbamoyl phosphate	cbp[c] => cbp[p]				Transport	0	0	1000	0	2
SSA1-Por_UP_ALA-L	Import L-Alanine	ala-L[c] => ala-L[p]				Transport	0	0	1000	0	2
SSA1-Por_UP_ASN-L	Import L-Asparagine	asn-L[c] => asn-L[p]				Transport	0	0	1000	0	2
SSA1-Por_UP_ASP-L	Import L-Aspartate	asp-L[c] => asp-L[p]				Transport	0	0	1000	0	2
SSA1-Por_UP_CYS-L	Import L-Cysteine	cys-L[c] => cys-L[p]				Transport	0	0	1000	0	2
SSA1-Por_UP_GLN-L	Import L-Glutamine	gln-L[c] => gln-L[p]				Transport	0	0	1000	0	2
SSA1-Por_UP_GLY	Import Glycine	gly[c] => gly[p]				Transport	0	0	1000	0	2
SSA1-Por_UP_PRO-L	Import L-Proline	pro-L[c] => pro-L[p]				Transport	0	0	1000	0	2
SSA1-Por_UP_SER-L	Import L-Serine	ser-L[c] => ser-L[p]				Transport	0	0	1000	0	2
SSA1-Por_UP_TYR-L	Import L-Tyrosine	tyr-L[c] => tyr-L[p]				Transport	0	0	1000	0	2
SSA1-Por_UP_ARG-L	Import Arginine	arg-L[c] => arg-L[p]				Transport	0	0	1000	0	2
SSA1-Por_UP_HIS-L	Import Histidine	his-L[c] => his-L[p]				Transport	0	0	1000	0	2
SSA1-Por_UP_ILE-L	Import Isoleucine	ile-L[c] => ile-L[p]				Transport	0	0	1000	0	2
SSA1-Por_UP_LEU-L	Import Leucine	leu-L[c] => leu-L[p]				Transport	0	0	1000	0	2
SSA1-Por_UP_LYS-L	Import L-Lysine	lys-L[c] => lys-L[p]				Transport	0	0	1000	0	2
SSA1-Por_UP_PHE-L	Import Phenylalanine	phe-L[c] => phe-L[p]				Transport	0	0	1000	0	2
SSA1-Por_UP_VAL-L	Import L-Valine	val-L[c] => val-L[p]				Transport	0	0	1000	0	2
SSA1-Por_EF_CHOR	Export Chorismate	chor[p] => chor[c]				Transport	0	0	1000	0	2
SSA1-Por_EF_SUCC	Export Succinate	succ[p] => succ[c]				Transport	0	0	1000	0	2
SSA1-Por_EF_6PGL	Export 6-phospho-D-glucono-1,5-lactone	6pgl[p] => 6pgl[c]				Transport	0	0	1000	0	2
SSA1-Por_EF_RU5P-D	Export D-Ribulose 5-phosphate	ru5p-D[p] => ru5p-D[c]				Transport	0	0	1000	0	2
SSA1-Por_EF_G3P	Export Glyceraldehyde 3-phosphate	g3p[p] => g3p[c]				Transport	0	0	1000	0	2
SSA1-Por_EF_PPI	Export Diphosphate	ppi[p] => ppi[c]				Transport	0	0	1000	0	2
SSA1-Por_EF_PANT-R	Export (R)-Pantoate	pant-R[p] => pant-R[c]				Transport	0	0	1000	0	2
SSA1-Por_EF_PHPYR	Export Phenylpyruvate	phpyr[p] => phpyr[c]				Transport	0	0	1000	0	2
SSA1-Por_EF_3MOB	Export 3-Methyl-2-oxobutanoate	3mob[p] <=> 3mob[c]				Transport	0	0	1000	0	2
SSA1-Por_EF_3MOP	Export (S)-3-Methyl-2-oxopentanoate	3mop[p] => 3mop[c]				Transport	0	0	1000	0	2
SSA1-Por_EF_4MOP	Export 4-Methyl-2-oxopentanoate	4mop[p] => 4mop[c]				Transport	0	0	1000	0	2
SSA1-Por_EF_SUCCOA	Export succinyl coA	succoa[p] <=> succoa[c]				Transport	0	0	1000	0	2
SSA1-Por_EF_DAD-5	Export 5'-Deoxyadenosine	dad-5[p] => dad-5[c]				Transport	0	0	1000	0	2
SSA1-Por_EF_AMP	Export AMP	amp[p] => amp[c]				Transport	0	0	1000	0	2
SSA1-Por_EF_THF	Export 5,6,7,8-Tetrahydrofolate	thf[p] => thf[c]				Transport	0	0	1000	0	2
SSA1-Por_EF_FAD	Export FAD	fad[p] => fad[c]				Transport	0	0	1000	0	2
SSA1-Por_EF_AICAR	Export 5-Amino-1-(5-Phospho-D-ribosyl)imidazole-4-carboxamide	aicar[p] => aicar[c]				Transport	0	0	1000	0	2
SSA1-Por_EF_NH4	Export ammonia	nh4[p] <=> nh4[c]				Transport	0	0	1000	0	2
SSA1-Por_EF_GLUTRNA	Export L-Glutamyl-tRNA(Glu)	glutrna[p] => glutrna[c]				Transport	0	0	1000	0	2
SSA1-Por_EF_CITR-L	Export L-Citrulline	citr-L[p] => citr-L[c]				Transport	0	0	1000	0	2
SSA1-Por_EF_23DHDP	Export 2,3-Dihydrodipicolinate	23dhdp[p] => 23dhdp[c]				Transport	0	0	1000	0	2
SSA1-Por_EF_26DAP-LL	Export LL-2,6-Diaminoheptanedioate	26dap-LL[p] => 26dap-LL[c]				Transport	0	0	1000	0	2
SSA1-Por_EF_ARGSUC	Export N(omega)-(L-Arginino)succinate	argsuc[p] => argsuc[c]				Transport	0	0	1000	0	2
SSA1-Por_EF_HISP	Export L-Histidinol phosphate	hisp[p] => hisp[c]				Transport	0	0	1000	0	2
SSA1-Por_EF_TRP-L	Export L-Tryptophan	trp-L[p] => trp-L[c]				Transport	0	0	1000	0	2
SSA1-Por_EF_THR-L	Export L-Threonine	thr-L[p] => thr-L[c]				Transport	0	0	1000	0	2
SSA1-Por_EF_MET-L	Export L-Methionine	met-L[p] => met-L[c]				Transport	0	0	1000	0	2
SSA1-Bt_ALATA_L	L-alanine transaminase	glu-L[c] + pyr[c] <=> akg[c] + ala-L[c]	(ENSSSA1UGT026921 or ENSSSA1UGT007016 or ENSSSA1UGT007957)	ENSSSA1UGT026921 ENSSSA1UGT007016 ENSSSA1UGT007957		Alanine Biosynthesis II	1	-1000	6.45	0	2	2.6.1.2
SSA1-Bt_ASPTA	aspartate transaminase	glu-L[c] + oaa[c] <=> akg[c] + asp-L[c]	(ENSSSA1UGT023690 or ENSSSA1UGT008794 or ENSSSA1UGT008852)	ENSSSA1UGT023690 ENSSSA1UGT008794 ENSSSA1UGT008852	AspC	Glutamate Degradation	1	-1000	6.08	0	2	2.6.1.1
SSA1-Bt_ASNS1	asparagine synthase (glutamine-hydrolysing)	asp-L[c] + atp[c] + gln-L[c] + h2o[c] => amp[c] + asn-L[c] + glu-L[c] + h[c] + ppi[c]	ENSSSA1UGT006715	ENSSSA1UGT006715	AsnB	Aspartate Metabolism	0	0	5.27	0	2	6.3.5.4
SSA1-Bt_ASNN	L-asparaginase	asn-L[c] + h2o[c] => asp-L[c] + nh4[c]	(ENSSSA1UGT009664 or ENSSSA1UGT022252 or ENSSSA1UGT027098)	ENSSSA1UGT009664 ENSSSA1UGT022252 ENSSSA1UGT027098	AnsA	Asparagine Degradation	0	0	4.01	0	2	3.5.1.1
SSA1-Bt_DHDPRy	dihydrodipicolinate reductase (NADPH)	23dhdp[c] + h[c] + nadph[c] => nadp[c] + thdp[c]	Earlham_SSA1_SG1_HGAP_000256F_arrow_541574-609186	Earlham_SSA1_SG1_HGAP_000256F_arrow_541574-609186	DapB	Lysine Biosynthesis	0	0	1000	0	2	1.17.1.8
SSA1-Bt_DAPE	diaminopimelate epimerase	26dap-LL[c] <=> 26dap-M[c]	ENSSSA1UGT013675	ENSSSA1UGT013675	DapF	Lysine Biosynthesis	1	-1000	3.48	0	2	5.1.1.7
SSA1-Bt_DAPDC	diaminopimelate decarboxylase	26dap-M[c] + h[c] => co2[c] + lys-L[c]	ENSSSA1UGT007134	ENSSSA1UGT007134	LysA	Lysine Biosynthesis	0	0	6.61	0	2	4.1.1.20
SSA1-Bt_URCB	urea carboxylase/Urea amidolyase	atp[c] + urea[c] + hco3[c] <=> adp[c] + pi[c] + allphn[c] + 2 h[c]	ENSSSA1UGT005350	ENSSSA1UGT005350	DUR1,2	Urea degradation	1	-1000	1.67	0	2	6.3.4.6
SSA1-Bt_ALPH	allophanate hydrolase/Urea amidolyase	allphn[c] + h2o[c] + 3 h[c] => 2 co2[c] + 2 nh4[c]	ENSSSA1UGT005350	ENSSSA1UGT005350	AH/AHS1,2	Urea degradation	0	0	1.67	0	2	3.5.1.54
SSA1-Bt_GLUDy	glutamate dehydrogenase (NADP)	akg[c] + h[c] + nadph[c] + nh4[c] <=> glu-L[c] + h2o[c] + nadp[c]	(ENSSSA1UGT010321 or ENSSSA1UGT000847)	ENSSSA1UGT010321 ENSSSA1UGT000847	GdhA	Glutamate Biosynthesis	1	-1000	5.81	0	2	1.4.1.4
SSA1-Bt_GLUSy	glutamate synthase (NADPH)	akg[c] + gln-L[c] + h[c] + nadph[c] => 2 glu-L[c] + nadp[c]	ENSSSA1UGT010474	ENSSSA1UGT010474	GltB/GOGAT	Glutamate Biosynthesis	0	0	5.91	0	2	1.4.1.13
SSA1-Bt_GLNS	glutamine synthetase	atp[c] + glu-L[c] + nh4[c] => adp[c] + gln-L[c] + h[c] + pi[c]	ENSSSA1UGT014504	ENSSSA1UGT014504	GlnA/GLNS /GS	Glutamine Biosynthesis	0	0	6.94	0	2	6.3.1.2
SSA1-Bt_CBPS	carbamoyl-phosphate synthase (glutamine-hydrolysing)	2 atp[c] + gln-L[c] + h2o[c] + hco3[c] => 2 adp[c] + cbp[c] + glu-L[c] + 2 h[c] + pi[c]	ENSSSA1UGT025177	ENSSSA1UGT025177	CAD	Arginine Biosynthesis	0	0	5.02	0	2	6.3.5.5
SSA1-Bt_AMCY	aminoacylase-1	acorn[c] + h2o[c] => ac[c] + orn[c]	ENSSSA1UGT026340	ENSSSA1UGT026340		Arginine Biosynthesis	0	0	4.49	0	2	3.5.1.14
SSA1-Bt_PROD2	Proline dehydrogenase	fad[c] + pro-L[c] => 1pyr5c[c] + fadh2[c] + h[c]	ENSSSA1UGT028335	ENSSSA1UGT028335	PRODH	Proline Degradation	0	0	5.85	0	2	1.5.5.2
SSA1-Bt_P5CR	pyrroline-5-carboxylate reductase	1pyr5c[c] + 2 h[c] + nadph[c] <=> nadp[c] + pro-L[c]	(ENSSSA1UGT010402 or ENSSSA1UGT018892)	ENSSSA1UGT010402 ENSSSA1UGT018892	P5CR	Proline Biosynthesis	0	-1000	5.99	0	2	1.5.1.2
SSA1-Bt_P5CDr	1-pyrroline-5-carboxylate dehydrogenase	glu-L[c] + h[c] + nadh[c] <=> 1pyr5c[c] + 2 h2o[c] + nad[c]	(ENSSSA1UGT016218 or ENSSSA1UGT020151)	ENSSSA1UGT016218 ENSSSA1UGT020151	ALDH4A1/PCD	Glutamate Metabolism	1	-1000	6.07	0	2	1.2.1.88
SSA1-Bt_GSC	Glutamate semialdehyde conversion	1pyr5c[c] + h[c] + h2o[c] <=> glu5sa[c]			spontaneous	Proline Biosynthesis	1	-1000	1000	0	2
SSA1-Bt_ORNTAr	ornithine transaminase	glu-L[c] + glu5sa[c] <=> akg[c] + orn[c]	(ENSSSA1UGT018652 or ENSSSA1UGT006688)	ENSSSA1UGT018652 ENSSSA1UGT006688	OAT	Proline Biosynthesis	0	0	5.57	0	2	2.6.1.13
SSA1-Bt_ARGSS	argininosuccinate synthase	asp-L[c] + atp[c] + citr-L[c] => amp[c] + argsuc[c] + h[c] + ppi[c]	ENSSSA1UGT003597	ENSSSA1UGT003597	ArgG	Arginine Biosynthesis	0	0	6.53	0	2	6.3.4.5
SSA1-Bt_ARGSL	argininosuccinate lyase	argsuc[c] => arg-L[c] + fum[c]	ENSSSA1UGT003467	ENSSSA1UGT003467	ArgH	Arginine Biosynthesis	0	0	3.95	0	2	4.3.2.1
SSA1-Bt_METAT	methionine adenosyltransferase	atp[c] + h2o[c] + met-L[c] => amet[c] + pi[c] + ppi[c]	ENSSSA1UGT024342	ENSSSA1UGT024342	MetK	S-Adenosyl-L-Methionine Cycle	0	0	7.05	0	2	2.5.1.6
SSA1-Bt_DMT	DNA (cytosine-5-)-methyltransferase	amet[c] + dnac[c] <=> ahcys[c] + h[c] + dna5mtc[c]	(ENSSSA1UGT000853 or ENSSSA1UGT002948)	ENSSSA1UGT000853 ENSSSA1UGT002948	DCM/DNMT1	Methionine Metabolism	0	0	4.75	0	2	2.1.1.37
SSA1-Bt_AHCi	adenosylhomocysteinase	ahcys[c] + h2o[c] => hcys-L[c] + adn[c]	ENSSSA1UGT018476	ENSSSA1UGT018476	SAHH/AhcY	Methionine Metabolism	0	0	8.03	0	2	3.3.1.1
SSA1-Bt_BPNT	3',5'-bisphosphate nucleotidase	h2o[c] + pap[c] => amp[c] + pi[c]				Cysteine Metabolism	0	0	1000	0	2	3.1.3.7
SSA1-Bt_CYSTS	Cystathionine beta synthase	hcys-L[c] + ser-L[c] => cyst-L[c] + h2o[c]	ENSSSA1UGT023279	ENSSSA1UGT023279		Cysteine Metabolism	0	0	5.46	0	2	4.2.1.22
SSA1-Bt_CYSTGL	cystathionine g-lyase	h2o[c] + cyst-L[c] => 2obut[c] + cys-L[c] + nh4[c]	(ENSSSA1UGT014360 or ENSSSA1UGT022599 or ENSSSA1UGT028098)	ENSSSA1UGT014360 ENSSSA1UGT022599 ENSSSA1UGT028098	CGL/Cth	Cysteine Biosynthesis	0	0	7.71	0	2	4.4.1.1
SSA1-Bt_HCYSMT	homocysteine S-methyltransferase	amet[c] + hcys-L[c] => ahcys[c] + h[c] + met-L[c]	(ENSSSA1UGT022269 or ENSSSA1UGT004714)	ENSSSA1UGT022269 ENSSSA1UGT004714	mmuM	Methionine Biosynthesis	0	0	4.8	0	2	2.1.1.10
SSA1-Bt_HISTP	histidinol-phosphatase	h2o[c] + hisp[c] => histd[c] + pi[c]			HisB	Histidine Biosynthesis	0	0	1000	0	2	3.1.3.15
SSA1-Bt_HISTD	histidinol dehydrogenase	h2o[c] + histd[c] + 2 nad[c] => 3 h[c] + his-L[c] + 2 nadh[c]			HisD	Histidine Biosynthesis	0	0	1000	0	2	1.1.1.23
SSA1-Bt_THRD_L	L-threonine deaminase	thr-L[c] => 2obut[c] + nh4[c]	ENSSSA1UGT029095	ENSSSA1UGT029095	TD/SDS/THD1/IlvA	Threonine Degradation	0	0	5.34	0	2	4.3.1.19
SSA1-Bt_ILETA	isoleucine transaminase	3mop[c] + glu-L[c] => akg[c] + ile-L[c]	ENSSSA1UGT021004	ENSSSA1UGT021004	BCAT	Isoleucine Biosynthesis	0	0	8.04	0	2	2.6.1.42
SSA1-Bt_LEUTAi	leucine transaminase (irreversible)	4mop[c] + glu-L[c] => akg[c] + leu-L[c]	ENSSSA1UGT021004	ENSSSA1UGT021004	BCAT	Leucine Biosynthesis	0	0	8.04	0	2	2.6.1.42
SSA1-Bt_CHORM	chorismate mutase	chor[c] => pphn[c]	ENSSSA1UGT025651	ENSSSA1UGT025651	CM	Phenylalanine Biosynthesis	0	0	1000	0	2	5.4.99.5
SSA1-Bt_PHETA1	phenylalanine transaminase	glu-L[c] + phpyr[c] <=> akg[c] + phe-L[c]	(ENSSSA1UGT028668 or ENSSSA1UGT021004 or ENSSSA1UGT008852 or ENSSSA1UGT023690 or ENSSSA1UGT008794)	ENSSSA1UGT028668 ENSSSA1UGT021004 ENSSSA1UGT008852 ENSSSA1UGT023690 ENSSSA1UGT008794	AspC BCAT	Phenylalanine Biosynthesis	1	-1000	8.04	0	2	2.6.1.58
SSA1-Bt_PHETHPTOX	L-Phenylalanine,tetrahydrobiopterin:oxygen oxidoreductase (4-hydroxylating)	o2[c] + phe-L[c] + thbpt[c] => dhbpt[c] + h2o[c] + tyr-L[c]	(ENSSSA1UGT007044 or ENSSSA1UGT012699 or ENSSSA1UGT018020 or ENSSSA1UGT029004)	ENSSSA1UGT007044 ENSSSA1UGT012699 ENSSSA1UGT018020 ENSSSA1UGT029004	PhhA	Phenylalanine degradation	0	0	7.05	0	2	1.14.16.1
SSA1-Bt_PGCD	phosphoglycerate dehydrogenase	3pg[c] + nad[c] => 3php[c] + h[c] + nadh[c]	ENSSSA1UGT001968	ENSSSA1UGT001968	SerA	Serine Biosynthesis	0	0	7.09	0	2	1.1.1.95
SSA1-Bt_PSERT	phosphoserine transaminase	3php[c] + glu-L[c] => akg[c] + pser-L[c]	ENSSSA1UGT011663	ENSSSA1UGT011663	SerC	Serine Biosynthesis	0	0	7.63	0	2	2.6.1.52
SSA1-Bt_PSP_L	phosphoserine phosphatase (L-serine)	h2o[c] + pser-L[c] => pi[c] + ser-L[c]	ENSSSA1UGT027888	ENSSSA1UGT027888	SerB	Serine Biosynthesis	0	0	4.25	0	2	3.1.3.3
SSA1-Bt_THRAL	threonine ammonia-lyase (serine)	pyr[c] + nh4[c] <=> ser-L[c]	(ENSSSA1UGT029095 or ENSSSA1UGT002200)	ENSSSA1UGT029095 ENSSSA1UGT002200	TD/SDS/THD1/IlvA	Serine Metabolism	0	0	5.35	0	2	4.3.1.19
SSA1-Bt_VALTA	valine transaminase	3mob[c] + glu-L[c] <=> akg[c] + val-L[c]	ENSSSA1UGT021004	ENSSSA1UGT021004	BCAT	Valine Biosynthesis	1	-1000	8.04	0	2	2.6.1.42
SSA1-Bt_GLUTRS	Glutamyl-tRNA synthetase	atp[c] + glu-L[c] + trnaglu[c] => amp[c] + glutrna[c] + ppi[c]	(ENSSSA1UGT013438 or ENSSSA1UGT024760 or ENSSSA1UGT002394)	ENSSSA1UGT013438 ENSSSA1UGT024760 ENSSSA1UGT002394		Heme Biosynthesis	0	0	3.93	0		6.1.1.17
SSA1-Bt_GTPCI	GTP cyclohydrolase I	gtp[c] + h2o[c] => ahdt[c] + for[c] + h[c]	ENSSSA1UGT024916	ENSSSA1UGT024916	FolE	Folate Biosynthesis	0	0	7.33	0	2	3.5.4.16
SSA1-Bt_AKP1	Alkaline phosphatase Dihydroneopterin	ahdt[c] + 3 h2o[c] <=> dhnpt[c] + 2 h[c] + 3 pi[c]	(ENSSSA1UGT011108 or ENSSSA1UGT014423 or ENSSSA1UGT020426 or ENSSSA1UGT029214 or ENSSSA1UGT006594)	ENSSSA1UGT011108 ENSSSA1UGT014423 ENSSSA1UGT020426 ENSSSA1UGT029214 ENSSSA1UGT006594			1	-1000	3.69	0	2	3.1.3.1
SSA1-Bt_PTHPS	6-pyruvoyltetrahydropterin synthase	ahdt[c] => pppi[c] + 6pthp[c]	ENSSSA1UGT020502	ENSSSA1UGT020502	PTPS	Folate Biosynthesis	0	0	5.64	0	2	4.2.3.12
SSA1-Bt_SPR	sepiapterin reductase	2 h[c] + 6pthp[c] + 2 nadph[c] => 2 nadp[c] + thbpt[c]	ENSSSA1UGT019452	ENSSSA1UGT019452	SPR/FabG	Folate Biosynthesis	0	0	5.39	0	2	1.1.1.153
SSA1-Bt_THBIO1	5,6,7,8-tetrahydrobiopterin:NAD+ oxidoreductase	thbpt[c] + nad[c] <=> dhbpt[c] + nadh[c] + h[c]	ENSSSA1UGT000253	ENSSSA1UGT000253	Qdpr	Folate Biosynthesis	0	0	6.4	0	2	1.5.1.34
SSA1-Bt_THBIO2	5,6,7,8-tetrahydrobiopterin:NADP+ oxidoreductase	thbpt[c] + nadp[c] <=> dhbpt[c] + nadph[c] + h[c]	ENSSSA1UGT000253	ENSSSA1UGT000253	Qdpr	Folate Biosynthesis	0	0	6.4	0	2	1.5.1.34
SSA1-Bt_DHFS	dihydrofolate synthase/Folylpolyglutamate synthase	atp[c] + dhpt[c] + glu-L[c] => adp[c] + dhf[c] + h[c] + pi[c]	ENSSSA1UGT030859	ENSSSA1UGT030859	FolC	Folate Biosynthesis	0	0	4.65	0	2	6.3.2.17
SSA1-Bt_FOLR2	Folate reductase	dhf[c] + nadp[c] <=> fol[c] + nadph[c] + h[c]	ENSSSA1UGT002649	ENSSSA1UGT002649	FolA	One carbon pool by folate	0	0	4.61	0	2	1.5.1.3
SSA1-Bt_DHFR	Dihydrofolate reductase (NADP+)	dhf[c] + nadph[c] + h[c] <=> thf[c] + nadp[c]	ENSSSA1UGT002649	ENSSSA1UGT002649	FolA	One carbon pool by folate	1	-1000	4.61	0	2	1.5.1.3
SSA1-Bt_THFOR2	5,6,7,8-Tetrahydrofolate:NADP+ oxidoreductase	fol[c] + 2 nadph[c] + 2 h[c] => thf[c] + 2 nadp[c]	ENSSSA1UGT002649	ENSSSA1UGT002649	FolA	One carbon pool by folate	0	0	4.61	0	2	1.5.1.3
SSA1-Bt_FTHFL	Formate--tetrahydrofolate ligase	atp[c] + for[c] + thf[c] => 10fthf[c] + adp[c] + pi[c]	Earlham_SSA1_SG1_HGAP_000005F_arrow_5022025-5046892	Earlham_SSA1_SG1_HGAP_000005F_arrow_5022025-5046892	Fhs	One carbon pool by folate	0	0	1000	0	2	6.3.4.3
SSA1-Bt_FTHFO	10-formyltetrahydrofolate:NADP+ oxidoreductase	10fthf[c] + nadp[c] + h2o[c] => thf[c] + co2[c] + nadph[c] + h[c]	ENSSSA1UGT028798	ENSSSA1UGT028798	Fmt/ALDH	One carbon pool by folate	0	0	3.69	0	2	1.5.1.6
SSA1-Bt_GHMT2r	glycine hydroxymethyltransferase, reversible	ser-L[c] + thf[c] <=> gly[c] + h2o[c] + mlthf[c]	ENSSSA1UGT010745	ENSSSA1UGT010745	GlyA	N10-Formyl-Tetrahydrofolate Biosynthesis	1	-1000	7.48	0	2	2.1.2.1
SSA1-Bt_GLYCL	Glycine Cleavage System	gly[c] + nad[c] + thf[c] <=> co2[c] + mlthf[c] + nadh[c] + nh4[c]	(ENSSSA1UGT020713 and ENSSSA1UGT025589)	ENSSSA1UGT020713 ENSSSA1UGT025589	GcvT	N10-Formyl-Tetrahydrofolate Biosynthesis	1	-1000	6.35	0	2	2.1.2.10
SSA1-Bt_MTHFD	methylenetetrahydrofolate dehydrogenase (NADP)	mlthf[c] + nadp[c] <=> methf[c] + nadph[c]	ENSSSA1UGT027248	ENSSSA1UGT027248		N10-Formyl-Tetrahydrofolate Biosynthesis	1	-1000	5.49	0	2	1.5.1.5
SSA1-Bt_MTHFC	methenyltetrahydrofolate cyclohydrolase	h2o[c] + methf[c] <=> 10fthf[c] + h[c]	ENSSSA1UGT027248	ENSSSA1UGT027248		N10-Formyl-Tetrahydrofolate Biosynthesis	1	-1000	5.49	0	2	3.5.4.9
SSA1-Bt_RBFK	riboflavin kinase	atp[c] + ribflv[c] => adp[c] + fmn[c] + h[c]	(ENSSSA1UGT026636 or ENSSSA1UGT028005)	ENSSSA1UGT026636 ENSSSA1UGT028005	RibF/RFK	Flavin Biosynthesis	0	0	5.05	0	2	2.7.1.26
SSA1-Bt_FMNAT	FMN adenylyltransferase	atp[c] + fmn[c] + h[c] => fad[c] + ppi[c]	(ENSSSA1UGT026636 or ENSSSA1UGT028005)	ENSSSA1UGT026636 ENSSSA1UGT028006	RibF/FLAD1	Flavin Biosynthesis	0	0	5.05	0	2	2.7.7.2
SSA1-Bt_FADRx2	FAD reductase	fad[c] + h[c] + nadph[c] <=> fadh2[c] + nadp[c]	ENSSSA1UGT019555	ENSSSA1UGT019555		Cofactor and Prosthetic Group Biosynthesis	1	-1000	6.59	0	2	1.5.1.30
SSA1-Bt_FADRx	FAD reductase	fad[c] + h[c] + nadh[c] => fadh2[c] + nad[c]	ENSSSA1UGT019555	ENSSSA1UGT019555		Cofactor and Prosthetic Group Biosynthesis	0	0	6.59	0	2
SSA1-Bt_FE3Ri	Fe(III) reduction	fadh2[c] + 2 fe3[c] => fad[c] + 2 fe2[c] + 2 h[c]	ENSSSA1UGT019555	ENSSSA1UGT019555		Cofactor and Prosthetic Group Biosynthesis	0	0	6.59	0	2
SSA1-Bt_FLVRx	flavin reductase (NAD)	h[c] + nadh[c] + ribflv[c] => nad[c] + rbflvrd[c]	ENSSSA1UGT019555	ENSSSA1UGT019555		Cofactor and Prosthetic Group Biosynthesis	0	0	6.59	0	2	1.5.1.30
SSA1-Bt_FLVR	flavin reductase	h[c] + nadph[c] + ribflv[c] => nadp[c] + rbflvrd[c]	ENSSSA1UGT019555	ENSSSA1UGT019555		Flavin Reduction	0	0	6.59	0	2	1.5.1.30
SSA1-Bt_FMNRx	FMN reductase	fmn[c] + h[c] + nadh[c] => fmnh2[c] + nad[c]	ENSSSA1UGT019555	ENSSSA1UGT019555		Cofactor and Prosthetic Group Biosynthesis	0	0	6.59	0	2
SSA1-Bt_FMNRx2	FMN reductase	fmn[c] + h[c] + nadph[c] => fmnh2[c] + nadp[c]	ENSSSA1UGT019555	ENSSSA1UGT019555		Flavin Reduction	0	0	6.59	0	2
SSA1-Bt_NARP	nicotinamide ribonucleotide phosphohydrolase	nmn[c] + h2o[c] => rnam[c] + pi[c]	ENSSSA1UGT030307	ENSSSA1UGT030307	SurE/UshA	Nicotinate and nicotinamide metabolism	0	0	6.02	0	2	3.1.3.5
SSA1-Bt_RNMK	nicotinamide riboside kinase	rnam[c] + atp[c] => nmn[c] + adp[c] + h[c]	ENSSSA1UGT000490	ENSSSA1UGT000490	NadR/NRK1	Nicotinate and nicotinamide metabolism	0	0	3.6	0	2	2.7.1.22
SSA1-Bt_NRPH	nicotinate D-ribonucleotide phosphohydrolase	nicrnt[c] + h2o[c] => nicrns[c] + pi[c]	ENSSSA1UGT030307	ENSSSA1UGT030307	SurE/UshA	Nicotinate and nicotinamide metabolism	0	0	6.02	0	2	3.1.3.5
SSA1-Bt_NRSPRT	Nicotinate D-ribonucleoside:orthophosphate ribosyltransferase	nicrns[c] + pi[c] <=> nac[c] + r5p[c] + h[c]	ENSSSA1UGT019676	ENSSSA1UGT019676	PNP	Nicotinate and nicotinamide metabolism	1	-1000	4.91	0	2	2.4.2.1
SSA1-Bt_RNMK1	nicotinamide riboside kinase	nicrns[c] + atp[c] => nicrnt[c] + adp[c] + h[c]	ENSSSA1UGT000490	ENSSSA1UGT000490	NadR/NRK1	Nicotinate and nicotinamide metabolism	0	0	3.6	0	2	2.7.1.173
SSA1-Bt_NAPT	nicotinamide phosphoribosyltransferase	nmn[c] + ppi[c] <=> ncam[c] + prpp[c] + h[c]	ENSSSA1UGT019676	ENSSSA1UGT019676	PNP	Nicotinate and nicotinamide metabolism	1	-1000	4.91	0	2	2.4.2.1
SSA1-Bt_NMNAT	Nicotinamide-nucleotide adenylyltransferase	atp[c] + nmn[c] + h[c] <=> ppi[c] + nad[c]	ENSSSA1UGT000975	ENSSSA1UGT000975	NadD/NMNAT	Nicotinate and nicotinamide metabolism	1	-1000	4.66	0	2	2.7.7.18;2.7.7.1
SSA1-Bt_NAAH	nicotinamide amidohydrolase	ncam[c] + h2o[c] => nac[c] + nh4[c]	(ENSSSA1UGT011212 or ENSSSA1UGT003537)	ENSSSA1UGT011212 ENSSSA1UGT003537	PncA	Nicotinate and nicotinamide metabolism	0	0	4.52	0	2	3.5.1.19
SSA1-Bt_NCTPPRT	Nicotinate phosphoribosyltransferase	atp[c] + h2o[c] + nac[c] + prpp[c] <=> adp[c] + nicrnt[c] + pi[c] + ppi[c]	Earlham_SSA1_SG1_HGAP_000082F_arrow_630939-680034	Earlham_SSA1_SG1_HGAP_000082F_arrow_630939-680034	PncB	Nicotinate and nicotinamide metabolism	1	-1000	1000	0	2	6.3.4.21
SSA1-Bt_ANNA	ATP:nicotinamide-nucleotide adenylyltransferase	atp[c] + nicrnt[c] + h[c] <=> ppi[c] + dnad[c]	ENSSSA1UGT000975	ENSSSA1UGT000975	NadD/NMNAT	Nicotinate and nicotinamide metabolism	1	-1000	4.66	0	2	2.7.7.18;2.7.7.1
SSA1-Bt_DNGAL	deamido-NAD+:L-glutamine amido-ligase (AMP-forming)	atp[c] + dnad[c] + gln-L[c] + h2o[c] => amp[c] + ppi[c] + nad[c] + glu-L[c] + h[c]	ENSSSA1UGT019222	ENSSSA1UGT019222	NadE/NADSYN1	Nicotinate and nicotinamide metabolism	0	0	4.28	0	2	6.3.5.1
SSA1-Bt_NADK	NAD kinase	atp[c] + nad[c] => adp[c] + h[c] + nadp[c]	(ENSSSA1UGT017371 and ENSSSA1UGT007227)	ENSSSA1UGT017371 ENSSSA1UGT007227	NadF/NADK/PpnK	NAD Phosphorylation	0	0	5.14	0	2	2.7.1.23
SSA1-Bt_AMAOT	adenosylmethionine-8-amino-7-oxononanoate transaminase	8aonn[c] + amet[c] => amob[c] + dann[c]	(Earlham_SSA1_SG1_HGAP_000024F_arrow_4385697-4418725 or Earlham_SSA1_SG1_HGAP_000193F_arrow_215675-227343)	Earlham_SSA1_SG1_HGAP_000024F_arrow_4385697-4418725 Earlham_SSA1_SG1_HGAP_000193F_arrow_215675-227343	BioA	Biotin biosynthesis	0	0	1000	0	2	2.6.1.62
SSA1-Bt_DBTS	dethiobiotin synthase	atp[c] + co2[c] + dann[c] => adp[c] + dtbt[c] + 3 h[c] + pi[c]	ENSSSA1UGT012203	ENSSSA1UGT012203	BioD	Biotin biosynthesis	0	0	4.63	0	2	6.3.3.3
SSA1-Bt_BTS5	Biotin synthase	2fe2s[c] + amet[c] + dtbt[c] => 2fe1s[c] + btn[c] + dad-5[c] + h[c] + met-L[c]	ENSSSA1UGT031701	ENSSSA1UGT031701	BioB	Biotin biosynthesis	0	0	4.36	0	2	2.8.1.6
SSA1-Bt_MOHMT	3-methyl-2-oxobutanoate hydroxymethyltransferase	3mob[c] + h2o[c] + mlthf[c] => 2dhp[c] + thf[c]	(ENSSSA1UGT010749 or ENSSSA1UGT002124)	ENSSSA1UGT010749 ENSSSA1UGT002124	PanB	Pantothenate Biosynthesis	0	0	2.93	0	2	2.1.2.11
SSA1-Bt_PANTS	pantothenate synthase	ala-B[c] + atp[c] + pant-R[c] => amp[c] + h[c] + pnto-R[c] + ppi[c]	(ENSSSA1UGT010749 or ENSSSA1UGT002124)	ENSSSA1UGT010749 ENSSSA1UGT002124	PanC	Pantothenate Biosynthesis	0	0	2.93	0	2	6.3.2.1
SSA1-Bt_PNTK	pantothenate kinase	atp[c] + pnto-R[c] => 4ppan[c] + adp[c] + h[c]	(ENSSSA1UGT011824 or ENSSSA1UGT025078 or ENSSSA1UGT001757 or ENSSSA1UGT001819)	ENSSSA1UGT011824 ENSSSA1UGT025078 ENSSSA1UGT001757 ENSSSA1UGT001819	CoaA/PanK	Phosphopantothenate Biosynthesis	0	0	5.26	0	2	2.7.1.33
SSA1-Bt_PPNCL2	phosphopantothenate-cysteine ligase	4ppan[c] + ctp[c] + cys-L[c] => 4ppcys[c] + cmp[c] + h[c] + ppi[c]	ENSSSA1UGT030127	ENSSSA1UGT030127	CoaB/Dfp	Coenzyme A Biosynthesis	0	0	2.86	0	2	6.3.2.5
SSA1-Bt_PPCDC	phosphopantothenoylcysteine decarboxylase	4ppcys[c] + h[c] => co2[c] + pan4p[c]	ENSSSA1UGT014949	ENSSSA1UGT014949	CoaC/Dfp	Coenzyme A Biosynthesis	0	0	5.23	0	2	4.1.1.36
SSA1-Bt_PTPATi	pantetheine-phosphate adenylyltransferase	atp[c] + h[c] + pan4p[c] => dpcoa[c] + ppi[c]	ENSSSA1UGT006622	ENSSSA1UGT006622	CoaD	Coenzyme A Biosynthesis	0	0	4.5	0	2	2.7.7.3
SSA1-Bt_DPCOAK	dephospho-CoA kinase	atp[c] + dpcoa[c] => adp[c] + coa[c] + h[c]	ENSSSA1UGT006622	ENSSSA1UGT006622	CoaE	Coenzyme A Biosynthesis	0	0	4.5	0	2	2.7.1.24
SSA1-Bt_ALASm	5-aminolevulinate synthase	gly[c] + h[c] + succoa[c] => 5aop[c] + co2[c] + coa[c]	ENSSSA1UGT011999	ENSSSA1UGT011999	ALAS	Heme Biosynthesis	0	0	5.84	0	2	2.3.1.37
SSA1-Bt_PPBNGS	porphobilinogen synthase	2 5aop[c] => h[c] + 2 h2o[c] + ppbng[c]	(ENSSSA1UGT010546 or ENSSSA1UGT010852)	ENSSSA1UGT010546 ENSSSA1UGT010852	HemB	Heme Biosynthesis	0	0	3.96	0	2	4.2.1.24
SSA1-Bt_HMBS	hydroxymethylbilane synthase	h2o[c] + 4 ppbng[c] => hmbil[c] + 4 nh4[c]	ENSSSA1UGT004076	ENSSSA1UGT004076	HemC	Heme Biosynthesis	0	0	4.45	0	2	4.3.1.8
SSA1-Bt_UPP3S	uroporphyrinogen-III synthase	hmbil[c] => h2o[c] + uppg3[c]	ENSSSA1UGT026769	ENSSSA1UGT026769	HemD	Heme Biosynthesis	0	0	2.25	0	2	4.2.1.75
SSA1-Bt_UPPDC1	uroporphyrinogen decarboxylase (uroporphyrinogen III)	4 h[c] + uppg3[c] => 4 co2[c] + cpppg3[c]	ENSSSA1UGT025537	ENSSSA1UGT025537	HemE	Heme Biosynthesis	0	0	3.93	0	2	4.1.1.37
SSA1-Bt_CPPPGO	coproporphyrinogen oxidase (O2 required)	cpppg3[c] + 2 h[c] + o2[c] => 2 co2[c] + 2 h2o[c] + pppg9[c]	ENSSSA1UGT014102	ENSSSA1UGT014102	HemF	Heme Biosynthesis	0	0	3.77	0	2	1.3.3.3
SSA1-Bt_PPPGO	protoporphyrinogen oxidase (aerobic)	1.5 o2[c] + pppg9[c] => 3 h2o[c] + ppp9[c]	ENSSSA1UGT002517	ENSSSA1UGT002517	HemY	Heme Biosynthesis	0	0	4.32	0	2	1.3.3.4
SSA1-Bt_FCLT	Ferrochelatase	fe2[c] + ppp9[c] => 2 h[c] + pheme[c]	ENSSSA1UGT013955	ENSSSA1UGT013955	HemH	Heme Biosynthesis	0	0	4.89	0	2	4.99.1.1
SSA1-Bt_HEMEOS	Heme O synthase	frdp[c] + h2o[c] + pheme[c] => hemeO[c] + ppi[c]	ENSSSA1UGT009463	ENSSSA1UGT009463	CyoE	Heme Biosynthesis	0	0	5.14	0	2	2.5.1.-
SSA1-Bt_HEMEAS	Heme A synthase	h2o[c] + hemeO[c] => hemeA[c] + 2 h[c]	ENSSSA1UGT006058	ENSSSA1UGT006058	COX15	Heme Biosynthesis	0	0	4.52	0	2
SSA1-Bt_PDXPP	Pyridoxine-5'-phosphate phosphohydrolase	pdx5p[c] + h2o[c] => pydxn[c] + pi[c]	000262F|arrow:454297-457603	000262F|arrow:454297-457603	PHOSPHO2/PdxP	Vitamin B6 metabolism	0	0	1000	0	2	3.1.3.74
SSA1-Bt_PYAMPP	Pyridoxamine-5'-phosphate phosphohydrolase	pyam5p[c] + h2o[c] => pydam[c] + pi[c]	000262F|arrow:454297-457603	000262F|arrow:454297-457603	PHOSPHO2/PdxP	Vitamin B6 metabolism	0	0	1000	0	2	3.1.3.74
SSA1-Bt_PYDXPP	Pyridoxal-5'-phosphate phosphohydrolase	pydx5p[c] + h2o[c] => pydx[c] + pi[c]	000262F|arrow:454297-457603	000262F|arrow:454297-457603	PHOSPHO2/PdxP	Vitamin B6 metabolism	0	0	1000	0	2	3.1.3.74
SSA1-Bt_PYDXO	Pyridoxamine:oxygen oxidoreductase (deaminating)	pydam[c] + h2o[c] + o2[c] <=> pydx[c] + nh4[c] + h2o2[c]	(ENSSSA1UGT017663 or ENSSSA1UGT025770 or ENSSSA1UGT017442)	ENSSSA1UGT017663 ENSSSA1UGT025770 ENSSSA1UGT017442	PdxH/PNPO	Vitamin B6 metabolism	1	-1000	6.57	0	2	1.4.3.5
SSA1-Bt_PYDXNO	Pyridoxine:oxygen oxidoreductase (deaminating)	pydxn[c] + o2[c] <=> pydx[c] + h2o2[c]	(ENSSSA1UGT017663 or ENSSSA1UGT025770 or ENSSSA1UGT017442)	ENSSSA1UGT017663 ENSSSA1UGT025770 ENSSSA1UGT017443	PdxH/PNPO	Vitamin B6 metabolism	1	-1000	6.57	0	2	1.4.3.5
SSA1-Bt_PYAM5PO	pyridoxamine 5'-phosphate oxidase	h2o[c] + o2[c] + pyam5p[c] => h2o2[c] + nh4[c] + pydx5p[c]	(ENSSSA1UGT017663 or ENSSSA1UGT025770 or ENSSSA1UGT017442)	ENSSSA1UGT017663 ENSSSA1UGT025770 ENSSSA1UGT017444	PdxH/PNPO	Pyridoxal 5'-Phosphate Salvage	0	0	6.57	0	2	1.4.3.5
SSA1-Bt_PDX5POi	pyridoxine 5'-phosphate oxidase	o2[c] + pdx5p[c] => h2o2[c] + pydx5p[c]	(ENSSSA1UGT017663 or ENSSSA1UGT025770 or ENSSSA1UGT017442)	ENSSSA1UGT017663 ENSSSA1UGT025770 ENSSSA1UGT017445	PdxH/PNPO	Pyridoxal 5'-Phosphate Biosynthesis	0	0	6.57	0	2	1.4.3.5
SSA1-Bt_PYDXK	pyridoxal kinase	atp[c] + pydx[c] => adp[c] + h[c] + pydx5p[c]	ENSSSA1UGT016376	ENSSSA1UGT016376	PdxK	Pyridoxal 5'-Posphate Salvage	0	0	6.99	0	2	2.7.1.35
SSA1-Bt_PYDAMK	ATP:pyridoxal 5'-phosphotransferase	atp[c] + pydam[c] => adp[c] + pyam5p[c] + h[c]	ENSSSA1UGT016376	ENSSSA1UGT016376	PdxK	Vitamin B6 metabolism	0	0	6.99	0	2	2.7.1.35
SSA1-Bt_PYDXNK	ATP:pyridoxine 5'-phosphotransferase	atp[c] + pydxn[c] => adp[c] + pdx5p[c] + h[c]	ENSSSA1UGT016376	ENSSSA1UGT016376	PdxK	Vitamin B6 metabolism	0	0	6.99	0	2	2.7.1.35
SSA1-Bt_GCL	glutamate---cysteine ligase	atp[c] + cys-L[c] + glu-L[c] => adp[c] + glucys[c] + h[c] + pi[c]	ENSSSA1UGT017909	ENSSSA1UGT017909	GCS/GshA	Glutamate metabolism;Glutathione metabolism	0	0	4.47	0	2	6.3.2.2
SSA1-Bt_GTHS	glutathione synthetase	atp[c] + glucys[c] + gly[c] => adp[c] + gthrd[c] + h[c] + pi[c]	ENSSSA1UGT012746	ENSSSA1UGT012746	GSH/GshB	Glutathione Biosynthesis	0	0	5.24	0	2	6.3.2.3
SSA1-Bt_GTHP	glutathione peridoxase	2 gthrd[c] + h2o2[c] <=> gthox[c] + 2 h2o[c]	ENSSSA1UGT013990	ENSSSA1UGT013990	GSHPx/GstA	Glutathione metabolism	1	-1000	6.19	0	2	1.11.1.9/1.5.4.1
SSA1-Bt_ICYSDS	ISC Cysteine desulfuration	cys-L[c] + iscs[c] => ala-L[c] + iscssh[c]	ENSSSA1UGT017946	ENSSSA1UGT017946	IscS	Cofactor and Prosthetic Group Biosynthesis	0	0	4.85	0	2
SSA1-Bt_I2FE2SS	ISC [2Fe-2S] Synthesis	fadh2[c] + 2 fe2[c] + 2 iscssh[c] + iscu[c] => fad[c] + 6 h[c] + 2 iscs[c] + iscu-2fe2s[c]	(ENSSSA1UGT028399 and ENSSSA1UGT017946 and ENSSSA1UGT025574)	ENSSSA1UGT028399 ENSSSA1UGT017946 ENSSSA1UGT025574	CyaY IscS IscU	Cofactor and Prosthetic Group Biosynthesis	0	0	5.48	0	2
SSA1-Bt_I2FE2SS2	ISC [2Fe-2S] Synthesis II	fadh2[c] + 2 fe2[c] + 2 iscssh[c] + iscu-2fe2s[c] => fad[c] + 6 h[c] + 2 iscs[c] + iscu-2fe2s2[c]	(ENSSSA1UGT028399 and ENSSSA1UGT017946 and ENSSSA1UGT025574)	ENSSSA1UGT028399 ENSSSA1UGT017946 ENSSSA1UGT025574	CyaY IscS IscU	Cofactor and Prosthetic Group Biosynthesis	0	0	5.48	0	2
SSA1-Bt_I2FE2SR	ISC [2Fe-2S] regeneration	2fe1s[c] + iscssh[c] + iscu[c] => 4 h[c] + iscs[c] + iscu-2fe2s[c]	(ENSSSA1UGT017946 and ENSSSA1UGT025574)	ENSSSA1UGT017946 ENSSSA1UGT025574	IscS IscU	Cofactor and Prosthetic Group Biosynthesis	0	0	6.3	0	2
SSA1-Bt_I4FE4SR	ISC [4Fe-4S] Reduction	fadh2[c] + 2 h[c] + iscu-2fe2s2[c] => fad[c] + iscu-4fe4s[c]	ENSSSA1UGT025574	ENSSSA1UGT025574	IscU	Cofactor and Prosthetic Group Biosynthesis	0	0	7.76	0	2
SSA1-Bt_I2FE2ST	ISC [2Fe-2S] Transfer	4 h[c] + iscu-2fe2s[c] => 2fe2s[c] + iscu[c]	ENSSSA1UGT025574	ENSSSA1UGT025574	ErpA IscU	Cofactor and Prosthetic Group Biosynthesis	0	0	7.76	0	2
SSA1-Bt_I4FE4ST	ISC [4Fe-4S] Transfer	4 h[c] + iscu-4fe4s[c] => 4fe4s[c] + iscu[c]	ENSSSA1UGT025574	ENSSSA1UGT025574	ErpA IscU	Cofactor and Prosthetic Group Biosynthesis	0	0	7.76	0	2
SSA1-Bt_ADCL	4-aminobenzoate synthase/aminodeoxychorismate lyase	4adcho[c] => 4abz[c] + h[c] + pyr[c]	ENSSSA1UGT021004	ENSSSA1UGT021004	BCAT/ilvE		0	0	8.04	0	2	4.1.3.38
SSA1-Bt_PGMT	phosphoglucomutase	g6p[c] <=> g1p[c]	ENSSSA1UGT029837	ENSSSA1UGT029837	PGM1 PGM2	UDP-Glucose Biosynthesis	1	-1000	6.35	0	2	5.4.2.2
SSA1-Bt_GLUK	Glucokinase/hexokinase	atp[c] + glc-D[c] => adp[c] + g6p[c] + h[c]	(ENSSSA1UGT008203 or ENSSSA1UGT005523)	ENSSSA1UGT008203 ENSSSA1UGT005523	HK1/HK2	Glycolysis/Gluconeogenesis	0	0	6.46	0	2	2.7.1.1
SSA1-Bt_PGI	glucose-6-phosphate isomerase	g6p[c] <=> f6p[c]	ENSSSA1UGT021805	ENSSSA1UGT021805	PGI	Glycolysis/Gluconeogenesis	0	0	6.51	0	2	5.3.1.9
SSA1-Bt_PFK	phosphofructokinase	atp[c] + f6p[c] => adp[c] + fdp[c] + h[c]	(ENSSSA1UGT026301 or ENSSSA1UGT027506 or ENSSSA1UGT027515)	ENSSSA1UGT026301 ENSSSA1UGT027506 ENSSSA1UGT027515	PFK	Glycolysis/Gluconeogenesis	0	0	6.18	0	2	2.7.1.11
SSA1-Bt_FBP	fructose-bisphosphatase	fdp[c] + h2o[c] => f6p[c] + pi[c]	ENSSSA1UGT013654	ENSSSA1UGT013654	FBP	Glycolysis/Gluconeogenesis	0	0	6.45	0	2	3.1.3.11
SSA1-Bt_FBA	fructose-bisphosphate aldolase	fdp[c] <=> dhap[c] + g3p[c]	ENSSSA1UGT010083	ENSSSA1UGT010083	FBA1	Glycolysis/Gluconeogenesis	1	-1000	9.41	0	2	4.1.2.13
SSA1-Bt_TPI	triose-phosphate isomerase	dhap[c] <=> g3p[c]	ENSSSA1UGT031014	ENSSSA1UGT031014	TpiA/TIM	Glycolysis/Gluconeogenesis	1	-1000	7.94	0	2	5.3.1.1
SSA1-Bt_GAPD	glyceraldehyde-3-phosphate dehydrogenase	g3p[c] + nad[c] + pi[c] <=> 13dpg[c] + h[c] + nadh[c]	Earlham_SSA1_SG1_HGAP_000000F_arrow_10662169-10671381	Earlham_SSA1_SG1_HGAP_000000F_arrow_10662169-10671381	GapA/GAPDH	Glycolysis/Gluconeogenesis	1	-1000	1000	0	2	1.2.1.12
SSA1-Bt_PGK	phosphoglycerate kinase	13dpg[c] + adp[c] <=> 3pg[c] + atp[c]	ENSSSA1UGT002011	ENSSSA1UGT002011	PGK1	Glycolysis/Gluconeogenesis	1	-1000	7.34	0	2	2.7.2.3
SSA1-Bt_PGM	phosphoglycerate mutase	3pg[c] <=> 2pg[c]	ENSSSA1UGT015219	ENSSSA1UGT015219	GpmA	Glycolysis/Gluconeogenesis	1	-1000	4.07	0	2	5.4.2.1
SSA1-Bt_ENO	enolase	2pg[c] <=> h2o[c] + pep[c]	ENSSSA1UGT006414	ENSSSA1UGT006414	Eno	Glycolysis/Gluconeogenesis	1	-1000	8.83	0	2	4.2.1.11
SSA1-Bt_PYK	pyruvate kinase	adp[c] + h[c] + pep[c] => atp[c] + pyr[c]	ENSSSA1UGT028537	ENSSSA1UGT028537	PykF/PK	Glycolysis/Gluconeogenesis	0	0	7.9	0	2	2.7.1.40
SSA1-Bt_PDH	pyruvate dehydrogenase	coa[c] + nad[c] + pyr[c] => accoa[c] + co2[c] + nadh[c]	(((ENSSSA1UGT005633 and ENSSSA1UGT007563) or (ENSSSA1UGT019795 and ENSSSA1UGT007563)) and ((ENSSSA1UGT005633 or ENSSSA1UGT019795) and (ENSSSA1UGT007563)) and (ENSSSA1UGT022182 or ENSSSA1UGT022007 or ENSSSA1UGT022013 or ENSSSA1UGT001444) and ENSSSA1UGT023602)	ENSSSA1UGT005633 ENSSSA1UGT007563 ENSSSA1UGT019795 ENSSSA1UGT022182 ENSSSA1UGT022007 ENSSSA1UGT022013 ENSSSA1UGT001444 ENSSSA1UGT023602	AceE/PDHA1/PDHA2/PDHB/AceF/DLAT/lpd/DLD	Glycolysis/Gluconeogenesis	0	0	6.22	0	2	1.2.4.1;2.3.1.12;1.8.1.4
SSA1-Bt_ACS	acetyl-CoA synthetase	ac[c] + atp[c] + coa[c] => accoa[c] + amp[c] + ppi[c]	ENSSSA1UGT021691	ENSSSA1UGT021691		Glycolysis/Gluconeogenesis	0	0	4.91	0	2	6.2.1.1
SSA1-Bt_PPCK	phosphoenolpyruvate carboxykinase (GTP)	gtp[c] + oaa[c] => gdp[c] + co2[c] + pep[c]	ENSSSA1UGT014522	ENSSSA1UGT014522	Pck/PEPCK	Anaplerotic Reactions	0	0	7.52	0	2	4.1.1.32
SSA1-Bt_PPS	phosphoenolpyruvate synthase	atp[c] + h2o[c] + pyr[c] => amp[c] + 2 h[c] + pep[c] + pi[c]	Earlham_SSA1_SG1_HGAP_000068F_arrow_1709576-1734599	Earlham_SSA1_SG1_HGAP_000068F_arrow_1709576-1734599	Ppsa	Pyruvate Metabolism	0	0	1000	0	2	2.7.9.2
SSA1-Bt_PCr	Pyruvate carboxylase	atp[c] + hco3[c] + pyr[c] <=> adp[c] + h[c] + oaa[c] + pi[c]	ENSSSA1UGT023524	ENSSSA1UGT023524	PC/Pyc	Citric Acid Cycle	1	-1000	7.59	0	2	6.4.1.1
SSA1-Bt_CS	citrate synthase	accoa[c] + h2o[c] + oaa[c] => cit[c] + coa[c] + h[c]	(ENSSSA1UGT006646 or ENSSSA1UGT023782)	ENSSSA1UGT006646 ENSSSA1UGT023782	GltA/ACLY	Citric Acid Cycle	0	0	7.75	0	2	2.3.3.1/2.3.3.8
SSA1-Bt_ACONTa	aconitase (half-reaction A, Citrate hydro-lyase)	cit[c] <=> acon-C[c] + h2o[c]	(ENSSSA1UGT029585 and ENSSSA1UGT026672)	ENSSSA1UGT029585 ENSSSA1UGT026672	AcnA	Citric Acid Cycle	1	-1000	6.91	0	2	4.2.1.3
SSA1-Bt_ACONTb	aconitase (half-reaction B, Isocitrate hydro-lyase)	acon-C[c] + h2o[c] <=> icit[c]	(ENSSSA1UGT029585 and ENSSSA1UGT026672)	ENSSSA1UGT029585 ENSSSA1UGT026673	AcnB	Citric Acid Cycle	1	-1000	6.91	0	2	4.2.1.3
SSA1-Bt_ICDHyr	isocitrate dehydrogenase (NADP)	icit[c] + nadp[c] <=> akg[c] + co2[c] + nadph[c]	(ENSSSA1UGT016660 or ENSSSA1UGT021784)	ENSSSA1UGT016660 ENSSSA1UGT021784	Icd	Citric Acid Cycle	1	-1000	6.36	0	2	1.1.1.42
SSA1-Bt_ICDHm	isocitrate dehydrogenase (NAD)	icit[c] + nad[c] => akg[c] + co2[c] + nadh[c]	(ENSSSA1UGT011657 or ENSSSA1UGT021888)	ENSSSA1UGT011657 ENSSSA1UGT021888	Icd	Citric Acid Cycle	0	0	6.12	0	2	1.1.1.41
SSA1-Bt_AKGDH	2-Oxogluterate dehydrogenase	akg[c] + coa[c] + nad[c] => co2[c] + nadh[c] + succoa[c]	(ENSSSA1UGT023602 and ENSSSA1UGT015269 and ENSSSA1UGT026612)	ENSSSA1UGT023602 ENSSSA1UGT015269 ENSSSA1UGT026612	SucAB lpd	Citric Acid Cycle	0	0	5.91	0	2	1.2.4.2/1.8.1.4/2.3.1.61
SSA1-Bt_SUCOAS	succinyl-CoA synthetase (ADP-forming)	adp[c] + pi[c] + succoa[c] <=> atp[c] + coa[c] + succ[c]	(ENSSSA1UGT028315 and ENSSSA1UGT019132 and ENSSSA1UGT011894)	ENSSSA1UGT028315 ENSSSA1UGT019132 ENSSSA1UGT011894	SucDC	Citric Acid Cycle	1	-1000	6.13	0	2	6.2.1.4/6.2.1.5
SSA1-Bt_SUCDi	succinate dehydrogenase (irreversible)	q9[c] + succ[c] => fum[c] + q9h2[c]	(ENSSSA1UGT029582 and ENSSSA1UGT027362 and ENSSSA1UGT022737 and ENSSSA1UGT022350 and ENSSSA1UGT013278 and ENSSSA1UGT011582)	ENSSSA1UGT029582 ENSSSA1UGT027362 ENSSSA1UGT022737 ENSSSA1UGT022350 ENSSSA1UGT013278 ENSSSA1UGT011582	SdhCDAB	Citric Acid Cycle	0	0	6.46	0	2	1.3.5.1
SSA1-Bt_FUM	fumarase	fum[c] + h2o[c] <=> mal-L[c]	ENSSSA1UGT024583	ENSSSA1UGT024583	FumC	Citric Acid Cycle	1	-1000	6.77	0	2	4.2.1.2
SSA1-Bt_MDH	Malate dehydrogenase	mal-L[c] + nad[c] <=> h[c] + nadh[c] + oaa[c]	ENSSSA1UGT010290	ENSSSA1UGT010290	Mdh	Citric Acid Cycle	1	-1000	7.08	0	2	1.1.1.37
SSA1-Bt_G6PADH	glucose-6-phosphate-1-dehydrogenase	g6p[c] + nadp[c] => 6pgl[c] + h[c] + nadph[c]	ENSSSA1UGT019778	ENSSSA1UGT019778	Zwf	Pentose Phosphate Pathway	0	0	4.86	0	2	1.1.1.49
SSA1-Bt_PGL	6-phosphogluconolactonase	6pgl[c] + h2o[c] => 6pgc[c] + h[c]	ENSSSA1UGT000294	ENSSSA1UGT000294	Pgl	Pentose Phosphate Pathway	0	0	6.59	0	2	3.1.1.31
SSA1-Bt_GND	phosphogluconate dehydrogenase	6pgc[c] + nadp[c] => co2[c] + nadph[c] + ru5p-D[c]	ENSSSA1UGT016144	ENSSSA1UGT016144	Gnd	Pentose Phosphate Pathway	0	0	7.31	0	2	1.1.1.44
SSA1-Bt_RPE	ribulose 5-phosphate 3-epimerase	ru5p-D[c] <=> xu5p-D[c]	ENSSSA1UGT028114	ENSSSA1UGT028114	Rpe	Pentose Phosphate Pathway	1	-1000	4.69	0	2	5.1.3.1
SSA1-Bt_RPI	ribose-5-phosphate isomerase	ru5p-D[c] <=> r5p[c]	ENSSSA1UGT008067	ENSSSA1UGT008067	RpiA	Pentose Phosphate Pathway	1	-1000	6.67	0	2	5.3.1.6
SSA1-Bt_TKT1	transketolase	r5p[c] + xu5p-D[c] <=> g3p[c] + s7p[c]	(ENSSSA1UGT016241 or ENSSSA1UGT007565)	ENSSSA1UGT016241 ENSSSA1UGT007565	TktA	Pentose Phosphate Pathway	1	-1000	8.43	0	2	2.2.1.1
SSA1-Bt_TALA	transaldolase	g3p[c] + s7p[c] <=> e4p[c] + f6p[c]	ENSSSA1UGT027889	ENSSSA1UGT027889	TalAB	Pentose Phosphate Pathway	1	-1000	9.14	0	2	2.2.1.2
SSA1-Bt_TKT2	transketolase	e4p[c] + xu5p-D[c] <=> f6p[c] + g3p[c]	(ENSSSA1UGT016241 or ENSSSA1UGT007565)	ENSSSA1UGT016241 ENSSSA1UGT007565	TktA	Pentose Phosphate Pathway	1	-1000	8.43	0	2	2.2.1.1
SSA1-Bt_PFK_3	phosphofructokinase (s7p)	atp[c] + s7p[c] => adp[c] + h[c] + s17bp[c]	(ENSSSA1UGT027515 or ENSSSA1UGT027506 or ENSSSA1UGT026301)	ENSSSA1UGT027515 ENSSSA1UGT027506 ENSSSA1UGT026301	PfkA	Sedoheptulose Bisphosphate Bypass	0	0	6.18	0	2	2.7.1.11
SSA1-Bt_FBA3	Sedoheptulose 1,7-bisphosphate D-glyceraldehyde-3-phosphate-lyase	s17bp[c] <=> dhap[c] + e4p[c]	ENSSSA1UGT010083	ENSSSA1UGT010083	FbaA	Sedoheptulose Bisphosphate Bypass	1	-1000	9.4	0	2	4.1.2.13
SSA1-Bt_GALUi	UTP-glucose-1-phosphate uridylyltransferase (irreversible)	g1p[c] + h[c] + utp[c] => ppi[c] + udpg[c]	ENSSSA1UGT022587	ENSSSA1UGT022587	UGP	Sucrose metabolism	0	0	6.61	0	2	2.7.7.9
SSA1-Bt_GLCS2	glycogen synthase (UDPGlc)	udpg[c] => udp[c] + glycogen[c] + h[c]	ENSSSA1UGT013039	ENSSSA1UGT013039	GYS	Glycogen Biosynthesis	0	0	6.01	0	2	2.4.1.11
SSA1-Bt_GLCP	glycogen phosphorylase	glycogen[c] + pi[c] => g1p[c]	ENSSSA1UGT027673	ENSSSA1UGT027673	GlgP	Glycogen Degradation	0	0	7.63	0	2	2.4.1.1
SSA1-Bt_XYLI2	xylose isomerase	glc-D[c] <=> fru[c]	ENSSSA1UGT002618	ENSSSA1UGT002618	XylA	Xylose Degradation	1	-1000	3.97	0	2	5.3.1.5
SSA1-Bt_SAGH	alpha/beta-fructofuranosidase	sucr[c] + h2o[c] => fru[c] + glc-D[c]	(ENSSSA1UGT023520 or ENSSSA1UGT004181 or ENSSSA1UGT021177)	ENSSSA1UGT023520 ENSSSA1UGT004181 ENSSSA1UGT021177	SacC/ScrB/YicI	Sucrose Metabolism	0	0	6.08	0	2	3.2.1.26;3.2.1.20
SSA1-Bt_ATPS4m	ATP synthase Complex V	adp[c] + pi[c] + 4 h[e] <=> atp[c] + 3 h[c] + h2o[c]	(Earlham_SSA1_SG1_HGAP_000030F_arrow_584705-612620 and Earlham_SSA1_SG1_HGAP_000134F_arrow_860160-893460 and Earlham_SSA1_SG1_HGAP_000018F_arrow_2525843-2536219 and Earlham_SSA1_SG1_HGAP_000113F_arrow_1163029-1169754 and Earlham_SSA1_SG1_HGAP_000019F_arrow_4128374-4135597 and Earlham_SSA1_SG1_HGAP_000028F_arrow_2459261-2459887 and Earlham_SSA1_SG1_HGAP_000108F_arrow_1205793-1210760 and Earlham_SS…	Earlham_SSA1_SG1_HGAP_000030F_arrow_584705-612620 Earlham_SSA1_SG1_HGAP_000134F_arrow_860160-893460 Earlham_SSA1_SG1_HGAP_000018F_arrow_2525843-2536219 Earlham_SSA1_SG1_HGAP_000113F_arrow_1163029-1169754 Earlham_SSA1_SG1_HGAP_000019F_arrow_4128374-4135597 Earlham_SSA1_SG1_HGAP_000028F_arrow_2459261-2459887 Earlham_SSA1_SG1_HGAP_000108F_arrow_1205793-1210760 Earlham_SSA1_SG1_HGAP_000026F_arrow_159…	V and F type ATPase	Oxidative Phosphorylation	0	0	1000	0	2	3.6.3.14
SSA1-Bt_CYOO6m	cytochrome c oxidase Complex IV	4 focytc[c] + 8 h[c] + o2[c] => 4 ficytc[c] + 4 h[e] + 2 h2o[c]	(Earlham_SSA1_SG1_HGAP_000429F_arrow_167017-181962 and Earlham_SSA1_SG1_HGAP_000002F_arrow_9040087-9450743 and (Earlham_SSA1_SG1_HGAP_000000F_arrow_6183-35823 or Earlham_SSA1_SG1_HGAP_000246F_arrow_96382-126999) and Earlham_SSA1_SG1_HGAP_000002F_arrow_8802126-8806555 and Earlham_SSA1_SG1_HGAP_000388F_arrow_444354-504302 and Earlham_SSA1_SG1_HGAP_000021F_arrow_3561491-3571129 and Earlham_SSA1_SG1_…	Earlham_SSA1_SG1_HGAP_000429F_arrow_167017-181962 Earlham_SSA1_SG1_HGAP_000002F_arrow_9040087-9450743 Earlham_SSA1_SG1_HGAP_000000F_arrow_6183-35823 or Earlham_SSA1_SG1_HGAP_000246F_arrow_96382-126999 Earlham_SSA1_SG1_HGAP_000002F_arrow_8802126-8806555 Earlham_SSA1_SG1_HGAP_000388F_arrow_444354-504302 Earlham_SSA1_SG1_HGAP_000021F_arrow_3561491-3571129 Earlham_SSA1_SG1_HGAP_000192F_arrow_807424-8…		Oxidative Phosphorylation	0	0	1000	0	2	1.9.3.1
SSA1-Bt_CYOR(q9)m	ubiquinol-cytochrome c oxidoreductase Complex III	2 ficytc[c] + 2 h[c] + q9h2[c] => 2 focytc[c] + 4 h[e] + q9[c]	(Earlham_SSA1_SG1_HGAP_000024F_arrow_3250739-3271908 and Earlham_SSA1_SG1_HGAP_000532F_arrow_156776-195785 and Earlham_SSA1_SG1_HGAP_000000F_arrow_14563501-14573253 and Earlham_SSA1_SG1_HGAP_000037F_arrow_2242938-2247282 and Earlham_SSA1_SG1_HGAP_000286F_arrow_190770-206483)	Earlham_SSA1_SG1_HGAP_000024F_arrow_3250739-3271908 Earlham_SSA1_SG1_HGAP_000532F_arrow_156776-195785 Earlham_SSA1_SG1_HGAP_000000F_arrow_14563501-14573253 Earlham_SSA1_SG1_HGAP_000037F_arrow_2242938-2247282 Earlham_SSA1_SG1_HGAP_000286F_arrow_190770-206483		Oxidative Phosphorylation	0	0	1000	0	2	1.10.2.2
SSA1-Bt_NADHOR	NADH dehydrogenase (ubiquinone-9 ) Complex I	5 h[c] + nadh[c] + q9[c] => 4 h[e] + nad[c] + q9h2[c]	(Earlham_SSA1_SG1_HGAP_000006F_arrow_2237708-2242674 and Earlham_SSA1_SG1_HGAP_000001F_arrow_3334406-3350044 and Earlham_SSA1_SG1_HGAP_000379F_arrow_393473-397930)	000435Flarrow_289026-374964 000282Flarrow_504493-671862 000007Flarrow_2024399-2416423 000052Flarrow_150560-172791 000578Flarrow_1096-150490 000692Flarrow_97135-115716 000078Flarrow_1595915-1823635 000081Flarrow_1296112-1326376 000110Flarrow_1432078-1468755 000618Flarrow_204099-221807 000267Flarrow_405821-579655 001124Flarrow_11066-43256 000062Flarrow_1125423-1410771 000113Flarrow_504748-526441 00…		Oxidative Phosphorylation	0	0	1000	0	2	1.6.5.3; 1.6.99.3
SSA1-Bt_TRDR	thioredoxin reductase (NADPH)	h[c] + nadph[c] + trdox[c] => nadp[c] + trdrd[c]	(Earlham_SSA1_SG1_HGAP_000046F_arrow_203958-240864 or Earlham_SSA1_SG1_HGAP_000227F_arrow_716306-722324)	Earlham_SSA1_SG1_HGAP_000046F_arrow_203958-240864 Earlham_SSA1_SG1_HGAP_000227F_arrow_716306-722324		Oxidative Phosphorylation	0	0	1000	0	2	1.8.1.9
SSA1-Bt_PPA	inorganic diphosphatase	h2o[c] + ppi[c] => h[c] + 2 pi[c]	(Earlham_SSA1_SG1_HGAP_000083F_arrow_2069919-2081543 or Earlham_SSA1_SG1_HGAP_000518F_arrow_191868-207965 or Earlham_SSA1_SG1_HGAP_000020F_arrow_3156217-3160127) )	Earlham_SSA1_SG1_HGAP_000083F_arrow_2069919-2081543 Earlham_SSA1_SG1_HGAP_000518F_arrow_191868-207965 Earlham_SSA1_SG1_HGAP_000020F_arrow_3156217-3160127 )	Ppa	Oxidative Phosphorylation	0	0	1000	0	2	3.6.1.1
SSA1-Bt_ALKP	Alkaline phosphatase	dhap[c] + h2o[c] <=> dha[c] + pi[c]	(Earlham_SSA1_SG1_HGAP_000313F_arrow_282376-313799 or Earlham_SSA1_SG1_HGAP_000032F_arrow_27714-42136 or Earlham_SSA1_SG1_HGAP_000005F_arrow_85006-118231 or Earlham_SSA1_SG1_HGAP_000008F_arrow_6563864-6592217 or Earlham_SSA1_SG1_HGAP_000065F_arrow_110741-117916)	Earlham_SSA1_SG1_HGAP_000313F_arrow_282376-313799 Earlham_SSA1_SG1_HGAP_000032F_arrow_27714-42136 Earlham_SSA1_SG1_HGAP_000005F_arrow_85006-118231 Earlham_SSA1_SG1_HGAP_000008F_arrow_6563864-6592217 Earlham_SSA1_SG1_HGAP_000065F_arrow_110741-117916			1	-1000	1000	0	2	3.1.3.1
SSA1-Bt_DHAK	Dihydroxyacetone kinase	atp[c] + dha[c] => adp[c] + dhap[c] + h[c]	ENSSSA1UGT017137	ENSSSA1UGT017137	Dak1/Dak2	Glycerolipid metabolism	0	0	2.34	0	2	2.7.1.29
SSA1-Bt_TRIOK	Triokinase	atp[c] + glyald[c] <=> adp[c] + g3p[c] + h[c]	ENSSSA1UGT017137	ENSSSA1UGT017137			1	-1000	2.34	0	2	2.7.1.28
SSA1-Bt_FBA2	fructose-bisphosphate aldolase	f1p[c] <=> dhap[c] + glyald[c]	ENSSSA1UGT010083	ENSSSA1UGT010083		Fructose and mannose metabolism	1	-1000	9.41	0	2	4.1.2.13
SSA1-Bt_GDPPH	GDP phosphohydrolase	gdp[c] + h2o[c] => gmp[c] + pi[c] + h[c]	(ENSSSA1UGT008989 or ENSSSA1UGT010101 or ENSSSA1UGT011206 or ENSSSA1UGT022689 or ENSSSA1UGT026571 or ENSSSA1UGT029132 or ENSSSA1UGT029171)	ENSSSA1UGT008989 ENSSSA1UGT010101 ENSSSA1UGT011206 ENSSSA1UGT022689 ENSSSA1UGT026571 ENSSSA1UGT029132 ENSSSA1UGT029171		Purine metabolism	0	0	5.29	0	2	3.6.1.6
SSA1-Bt_UDPPH	UDP phosphohydrolase	udp[c] + h2o[c] => ump[c] + pi[c] + h[c]	(ENSSSA1UGT008989 or ENSSSA1UGT010101 or ENSSSA1UGT011206 or ENSSSA1UGT022689 or ENSSSA1UGT026571 or ENSSSA1UGT029132 or ENSSSA1UGT029171)	ENSSSA1UGT008989 ENSSSA1UGT010101 ENSSSA1UGT011206 ENSSSA1UGT022689 ENSSSA1UGT026571 ENSSSA1UGT029132 ENSSSA1UGT029172		Pyrimidine metabolism	0	0	5.29	0	2	3.6.1.6
SSA1-Bt_ACACT1r	acetyl-CoA C-acetyltransferase	2 accoa[c] <=> aacoa[c] + coa[c]	(ENSSSA1UGT008361 or ENSSSA1UGT009081 or ENSSSA1UGT019907)	ENSSSA1UGT008361 ENSSSA1UGT009081 ENSSSA1UGT019907	PaaJ	Polyisoprenoid Biosynthesis	1	-1000	6.75	0	2	2.3.1.9
SSA1-Bt_HMGCOAS	hydroxymethylglutaryl-coa synthase	accoa[c] + h2o[c] + aacoa[c] <=> hmgcoa[c] + coa[c] + h[c]	Earlham_SSA1_SG1_HGAP_000028F_arrow_2493800-2507638	Earlham_SSA1_SG1_HGAP_000028F_arrow_2493800-2507638		Polyisoprenoid Biosynthesis	1	-1000	1000	0	2	2.3.3.10
SSA1-Bt_HMGCOARx	Hydroxymethylglutaryl CoA reductase (ir)	2 h[c] + hmgcoa[c] + 2 nadph[c] => coa[c] + mev-R[c] + 2 nadp[c]	ENSSSA1UGT008355	ENSSSA1UGT008355	HMG1/HMGCR	Polyisoprenoid Biosynthesis	0	0	4.44	0	2	1.1.1.34
SSA1-Bt_MEVK1x	mevalonate kinase (atp)	atp[c] + mev-R[c] => h[c] + adp[c] + 5pmev[c]	ENSSSA1UGT018070	ENSSSA1UGT018070	MVK	Polyisoprenoid Biosynthesis	0	0	5.94	0	2	2.7.1.36
SSA1-Bt_PMEVKx	phosphomevalonate kinase	atp[c] + 5pmev[c] => adp[c] + 5dpmev[c]	ENSSSA1UGT005299	ENSSSA1UGT005299	PMVK	Polyisoprenoid Biosynthesis	0	0	4.41	0	2	2.7.4.2
SSA1-Bt_DPMVDx	diphosphomevalonate decarboxylase	atp[c] + 5dpmev[c] => adp[c] + co2[c] + ipdp[c] + pi[c]	ENSSSA1UGT015892	ENSSSA1UGT015892	MVD	Polyisoprenoid Biosynthesis	0	0	3.95	0	2	4.1.1.33
SSA1-Bt_IPDDI	isopentenyl-diphosphate D-isomerase	ipdp[c] <=> dmpp[c]	(ENSSSA1UGT024617 or ENSSSA1UGT024644 or ENSSSA1UGT024710)	ENSSSA1UGT024617 ENSSSA1UGT024644 ENSSSA1UGT024710	Idi	Polyisoprenoid Biosynthesis	1	-1000	5.19	0	2	5.3.3.2
SSA1-Bt_DMATT	dimethylallyltranstransferase	dmpp[c] + ipdp[c] => grdp[c] + ppi[c]	ENSSSA1UGT012791	ENSSSA1UGT012791	IspA	Polyisoprenoid Biosynthesis	0	0	4.52	0	2	2.5.1.1
SSA1-Bt_GRTT	geranyltranstransferase/Farnesyl diphosphate synthase	grdp[c] + ipdp[c] => frdp[c] + ppi[c]	ENSSSA1UGT012791	ENSSSA1UGT012791	IspA	Polyisoprenoid Biosynthesis	0	0	4.52	0	2	2.5.1.10
SSA1-Bt_FRTT	Geranylgeranyl pyrophosphate synthase/farnesyltransferase	frdp[c] + ipdp[c] => ppi[c] + ggdp[c]	ENSSSA1UGT010522	ENSSSA1UGT010522	GGPPS/IspA	Polyisoprenoid Biosynthesis	0	0	5.82	0	2	2.5.1.29
SSA1-Bt_HCO3E	HCO3 equilibration reaction	co2[c] + h2o[c] <=> h[c] + hco3[c]	(ENSSSA1UGT010285 or ENSSSA1UGT023401 or ENSSSA1UGT027912)	ENSSSA1UGT010285 ENSSSA1UGT023401 ENSSSA1UGT027912	Cah	Unassigned	1	-1000	4.65	0	2	4.2.1.1
SSA1-Bt_CAT	catalase	2 h2o2[c] <=> 2 h2o[c] + o2[c]	(ENSSSA1UGT023620 or ENSSSA1UGT028776 or ENSSSA1UGT030180 or ENSSSA1UGT003326 or ENSSSA1UGT003466)	ENSSSA1UGT023620 ENSSSA1UGT028776 ENSSSA1UGT030180 ENSSSA1UGT003326 ENSSSA1UGT003466	KatE	Unassigned	1	-1000	4.9	0	2	1.11.1.6
SSA1-Bt_R5PDP	ribose-phosphate diphosphokinase	atp[c] + r5p[c] => amp[c] + prpp[c] + h[c]	(ENSSSA1UGT010239 or ENSSSA1UGT029066)	ENSSSA1UGT010239 ENSSSA1UGT029066	PrsA	Nucleotide biosynthesis	0	0	6.44	0	2	2.7.6.1
SSA1-Bt_ASPCT	aspartate carbamoyltransferase, cytosol	cbp[c] + asp-L[c] => pi[c] + h[c] + cbasp[c]	ENSSSA1UGT025177	ENSSSA1UGT025177	CAD	UMP Biosynthesis	0	0	5.01	0	2	2.1.3.2
SSA1-Bt_DHORTS	dihydroorotase	cbasp[c] + h[c] <=> dhor-S[c] + h2o[c]	ENSSSA1UGT025177	ENSSSA1UGT025177	CAD	UMP Biosynthesis	1	-1000	5.01	0	2	3.5.2.3
SSA1-Bt_DHORD2	dihydoorotic acid dehydrogenase (quinone9)	dhor-S[c] + q9[c] => orot[c] + q9h2[c]	(ENSSSA1UGT006008 or ENSSSA1UGT022236)	ENSSSA1UGT006008 ENSSSA1UGT022236	PyrD/DHODH	UMP Biosynthesis	1	-1000	4.87	0	2	1.3.5.2
SSA1-Bt_ORPRT	orotate phosphoribosyltransferase	orot[c] + prpp[c] <=> orot5p[c] + ppi[c]	ENSSSA1UGT027554	ENSSSA1UGT027554	PyrE	UMP Biosynthesis	1	-1000	4.35	0	2	2.4.2.10
SSA1-Bt_ORPDC	orotidine-5'-phosphate decarboxylase	orot5p[c] + h[c] => ump[c] + co2[c]	ENSSSA1UGT027554	ENSSSA1UGT027554	PyrF	UMP Biosynthesis	0	0	4.35	0	2	4.1.1.23
SSA1-Bt_UMPK	UMP kinase	atp[c] + ump[c] => adp[c] + udp[c]	ENSSSA1UGT005414	ENSSSA1UGT005414	Cmk/Adk	UTP and CTP de novo biosynthesis	0	0	5.12	0	2	2.7.4.14
SSA1-Bt_ATUD	ATP:UDP phosphotransferase	atp[c] + udp[c] <=> adp[c] + utp[c]	(ENSSSA1UGT015276 or ENSSSA1UGT016124 or ENSSSA1UGT017814 or ENSSSA1UGT018563 or ENSSSA1UGT026306 or ENSSSA1UGT028874)	ENSSSA1UGT015276 ENSSSA1UGT016124 ENSSSA1UGT017814 ENSSSA1UGT018563 ENSSSA1UGT026306 ENSSSA1UGT028874	Ndk	UTP and CTP de novo biosynthesis	1	-1000	6.12	0	2	2.7.4.6
SSA1-Bt_UTAL	UTP:ammonia ligase (ADP-forming)	atp[c] + utp[c] + nh4[c] => adp[c] + pi[c] + ctp[c] + 2 h[c]	(ENSSSA1UGT018391 or ENSSSA1UGT028210)	ENSSSA1UGT018391 ENSSSA1UGT028210	PyrG	UTP and CTP de novo biosynthesis	0	0	4.27	0	2	6.3.4.2
SSA1-Bt_UTGAL	UTP:L-glutamine amido-ligase (ADP-forming)	atp[c] + utp[c] + gln-L[c] + h2o[c] => adp[c] + pi[c] + ctp[c] + glu-L[c] + 2 h[c]	(ENSSSA1UGT018391 or ENSSSA1UGT028210)	ENSSSA1UGT018391 ENSSSA1UGT028211	PyrG	UTP and CTP de novo biosynthesis	0	0	4.27	0	2	6.3.4.2
SSA1-Bt_ATCM	ATP:CMP phosphotransferase	atp[c] + cmp[c] <=> adp[c] + cdp[c]	ENSSSA1UGT005414	ENSSSA1UGT005414	Cmk/Adk	UTP and CTP de novo biosynthesis	1	-1000	5.12	0	2	2.7.4.14
SSA1-Bt_ATCD	ATP:CDP phosphotransferase	atp[c] + cdp[c] <=> adp[c] + ctp[c]	(ENSSSA1UGT015276 or ENSSSA1UGT016124 or ENSSSA1UGT017814 or ENSSSA1UGT018563 or ENSSSA1UGT026306 or ENSSSA1UGT028874)	ENSSSA1UGT015276 ENSSSA1UGT016124 ENSSSA1UGT017814 ENSSSA1UGT018563 ENSSSA1UGT026306 ENSSSA1UGT028874	Ndk	UTP and CTP de novo biosynthesis	1	-1000	7.1	0	2	2.7.4.6
SSA1-Bt_ATDCM	ATP:dCMP phosphotransferase	atp[c] + dcmp[c] <=> adp[c] + dcdp[c]	ENSSSA1UGT005414	ENSSSA1UGT005414	Cmk/Adk	UTP and CTP de novo biosynthesis	1	-1000	5.12	0	2	2.7.4.14
SSA1-Bt_ATDCD	ATP:dCDP phosphotransferase	atp[c] + dcdp[c] <=> adp[c] + dctp[c]	(ENSSSA1UGT015276 or ENSSSA1UGT016124 or ENSSSA1UGT017814 or ENSSSA1UGT018563 or ENSSSA1UGT026306 or ENSSSA1UGT028874)	ENSSSA1UGT015276 ENSSSA1UGT016124 ENSSSA1UGT017814 ENSSSA1UGT018563 ENSSSA1UGT026306 ENSSSA1UGT028874	Ndk	UTP and CTP de novo biosynthesis	1	-1000	7.1	0	2	2.7.4.6
SSA1-Bt_ATDGD	ATP:dGDP phosphotransferase	atp[c] + dgdp[c] <=> adp[c] + dgtp[c]	(ENSSSA1UGT015276 or ENSSSA1UGT016124 or ENSSSA1UGT017814 or ENSSSA1UGT018563 or ENSSSA1UGT026306 or ENSSSA1UGT028874)	ENSSSA1UGT015276 ENSSSA1UGT016124 ENSSSA1UGT017814 ENSSSA1UGT018563 ENSSSA1UGT026306 ENSSSA1UGT028875	Ndk	UTP and CTP de novo biosynthesis	1	-1000	7.1	0	2	2.7.4.6
SSA1-Bt_ATGD	ATP:GDP phosphotransferase	atp[c] + gdp[c] <=> adp[c] + gtp[c]	(ENSSSA1UGT015276 or ENSSSA1UGT016124 or ENSSSA1UGT017814 or ENSSSA1UGT018563 or ENSSSA1UGT026306 or ENSSSA1UGT028874)	ENSSSA1UGT015276 ENSSSA1UGT016124 ENSSSA1UGT017814 ENSSSA1UGT018563 ENSSSA1UGT026306 ENSSSA1UGT028876	Ndk	UTP and CTP de novo biosynthesis	1	-1000	7.1	0	2	2.7.4.6
SSA1-Bt_NDPK	nucleoside-diphosphate kinase	atp[c] + dadp[c] <=> adp[c] + datp[c]	(ENSSSA1UGT015276 or ENSSSA1UGT016124 or ENSSSA1UGT017814 or ENSSSA1UGT018563 or ENSSSA1UGT026306 or ENSSSA1UGT028874)	ENSSSA1UGT015276 ENSSSA1UGT016124 ENSSSA1UGT017814 ENSSSA1UGT018563 ENSSSA1UGT026306 ENSSSA1UGT028877	Ndk	UTP and CTP de novo biosynthesis	1	-1000	7.1	0	2	2.7.4.6
SSA1-Bt_ATDTD	ATP:dTDP phosphotransferase	atp[c] + dtdp[c] <=> adp[c] + dttp[c]	(ENSSSA1UGT015276 or ENSSSA1UGT016124 or ENSSSA1UGT017814 or ENSSSA1UGT018563 or ENSSSA1UGT026306 or ENSSSA1UGT028874)	ENSSSA1UGT015276 ENSSSA1UGT016124 ENSSSA1UGT017814 ENSSSA1UGT018563 ENSSSA1UGT026306 ENSSSA1UGT028878	Ndk	UTP and CTP de novo biosynthesis	1	-1000	7.1	0	2	2.7.4.6
SSA1-Bt_ATDUD	ATP:dUDP phosphotransferase	atp[c] + dudp[c] <=> adp[c] + dutp[c]	(ENSSSA1UGT015276 or ENSSSA1UGT016124 or ENSSSA1UGT017814 or ENSSSA1UGT018563 or ENSSSA1UGT026306 or ENSSSA1UGT028874)	ENSSSA1UGT015276 ENSSSA1UGT016124 ENSSSA1UGT017814 ENSSSA1UGT018563 ENSSSA1UGT026306 ENSSSA1UGT028879	Ndk	UTP and CTP de novo biosynthesis	1	-1000	7.1	0	2	2.7.4.6
SSA1-Bt_NTDP	nucleoside-triphosphate diphosphatase (GTP)	gtp[c] + h2o[c] => gmp[c] + ppi[c] + h[c]	(ENSSSA1UGT009500 or ENSSSA1UGT013637 or ENSSSA1UGT014214 or ENSSSA1UGT019682 or ENSSSA1UGT021457 or ENSSSA1UGT025426)	ENSSSA1UGT009500 ENSSSA1UGT013637 ENSSSA1UGT014214 ENSSSA1UGT019682 ENSSSA1UGT021457 ENSSSA1UGT025426	ITPA	Nucleotide Salvage Pathway	0	0	6.75	0	2	3.6.1.19
SSA1-Bt_PRDPAR	5-phosphoribosylamine:diphosphate phospho-alpha-D-ribosyltransferase (glutamate-amidating)	gln-L[c] + prpp[c] + h2o[c] => pram[c] + ppi[c] + glu-L[c]	ENSSSA1UGT031693	ENSSSA1UGT031693	PurF/PPAT	5-Aminoimidazole Ribonucleotide Biosynthesis	0	0	4.29	0	2	2.4.2.14
SSA1-Bt_PPRGL	phosphoribosylamine---glycine ligase	atp[c] + pram[c] + gly[c] => adp[c] + pi[c] + gar[c] + h[c]	Earlham_SSA1_SG1_HGAP_000141F_arrow_1109456-1125293	Earlham_SSA1_SG1_HGAP_000141F_arrow_1109456-1125293	PurD/GART	5-Aminoimidazole Ribonucleotide Biosynthesis	0	0	1000	0	2	6.3.4.13
SSA1-Bt_FPGFT	phosphoribosylglycinamide formyltransferase, cytosol	10fthf[c] + gar[c] <=> thf[c] + fgam[c] + h[c]	Earlham_SSA1_SG1_HGAP_000141F_arrow_1109456-1125293	Earlham_SSA1_SG1_HGAP_000141F_arrow_1109456-1125293	PurN/GART	5-Aminoimidazole Ribonucleotide Biosynthesis	1	-1000	1000	0	2	2.1.2.2
SSA1-Bt_PRFGS	phosphoribosylformylglycinamidine synthase	atp[c] + fgam[c] + gln-L[c] + h2o[c] => adp[c] + pi[c] + fpram[c] + glu-L[c] + h[c]	ENSSSA1UGT014513	ENSSSA1UGT014513	PurL/PFAS	5-Aminoimidazole Ribonucleotide Biosynthesis	0	0	4.66	0	2	6.3.5.3
SSA1-Bt_PRFGCL	phosphoribosylformylglycinamidine cyclo-ligase	atp[c] + fpram[c] => adp[c] + pi[c] + air[c] + 2 h[c]	Earlham_SSA1_SG1_HGAP_000141F_arrow_1109456-1125293	Earlham_SSA1_SG1_HGAP_000141F_arrow_1109456-1125293	PurM/GART	5-Aminoimidazole Ribonucleotide Biosynthesis	0	0	1000	0	2	6.3.3.1
SSA1-Bt_PRAIC	phosphoribosylaminoimidazole carboxylase, cytosol	air[c] + co2[c] <=> 5aizc[c] + h[c]	Earlham_SSA1_SG1_HGAP_000112F_arrow_181796-193659	Earlham_SSA1_SG1_HGAP_000112F_arrow_181796-193659	PurE/PIACS	Purine metabolism	1	-1000	1000	0	2	4.1.1.21
SSA1-Bt_PRAIS	phosphoribosylaminoimidazolesuccinocarboxamide synthase, cytosol	atp[c] + 5aizc[c] + asp-L[c] => adp[c] + pi[c] + 25aics[c] + h[c]	ENSSSA1UGT031642	ENSSSA1UGT031642	PurC/PAICS	IMP Biosynthesis	0	0	5.34	0	2	6.3.2.6
SSA1-Bt_AIAL	1-(5'-Phosphoribosyl)-5-amino-4-(N-succinocarboxamide)-imidazole AMP-lyase	25aics[c] <=> fum[c] + aicar[c]	Earlham_SSA1_SG1_HGAP_000040F_arrow_261226-297277	Earlham_SSA1_SG1_HGAP_000040F_arrow_261226-297277	PurB/ADSL	IMP Biosynthesis	1	-1000	1000	0	2	4.3.2.2
SSA1-Bt_FPAIF	phosphoribosylaminoimidazolecarboxamide formyltransferase	10fthf[c] + aicar[c] <=> thf[c] + fprica[c]	ENSSSA1UGT027614	ENSSSA1UGT027614	PurH/ATIC	IMP Biosynthesis	1	-1000	7.23	0	2	2.1.2.3
SSA1-Bt_ICH	IMP cyclohydrolase	fprica[c] <=> imp[c] + h2o[c]	ENSSSA1UGT027614	ENSSSA1UGT027614	PurH/ATIC	IMP Biosynthesis	1	-1000	7.23	0	2	2.1.2.3;3.5.4.10
SSA1-Bt_IMPD	IMP dehydrogenase	imp[c] + nad[c] + h2o[c] => xmp[c] + nadh[c] + h[c]	ENSSSA1UGT029114	ENSSSA1UGT029114	GuaB/IMPDH	Guanosine Nucleotides Biosynthesis	0	0	6.36	0	2	1.1.1.205
SSA1-Bt_GMPS(glu)	GMP synthase (glutamine-hydrolysing), cytosol	atp[c] + xmp[c] + gln-L[c] + h2o[c] => amp[c] + ppi[c] + gmp[c] + glu-L[c] + 2 h[c]	Earlham_SSA1_SG1_HGAP_000044F_arrow_1373790-1390176	Earlham_SSA1_SG1_HGAP_000044F_arrow_1373790-1390176	GuaA/GMPS	Guanosine Nucleotides Biosynthesis	0	0	1000	0	2	6.3.5.2
SSA1-Bt_GMP5N	GMP-5'-nucleotidase	gmp[c] + h2o[c] => gsn[c] + pi[c]	ENSSSA1UGT030307	ENSSSA1UGT030307	SurE/UshA	Nucleotide Salvage Pathway	0	0	6.01	0	2	3.1.3.5
SSA1-Bt_AGPT	ATP:GMP phosphotransferase	atp[c] + gmp[c] => adp[c] + gdp[c]	(ENSSSA1UGT012465 or ENSSSA1UGT015252 or ENSSSA1UGT024421 or ENSSSA1UGT025952)	ENSSSA1UGT012465 ENSSSA1UGT015252 ENSSSA1UGT024421 ENSSSA1UGT025952	Gmk/GUK1/GMPK	Guanosine Nucleotides Biosynthesis	0	0	4.73	0	2	2.7.4.8
SSA1-Bt_DGOTO	2'-Deoxyguanosine 5'-diphosphate:oxidized-thioredoxin 2'-oxidoreductase	gdp[c] + trdrd[c] => dgdp[c] + trdox[c] + h2o[c]	(ENSSSA1UGT019965 or ENSSSA1UGT019985 or ENSSSA1UGT026306)	ENSSSA1UGT019965 ENSSSA1UGT019985 ENSSSA1UGT026306	NrdAF	Guanosine Nucleotides Biosynthesis	0	0	6.68	0	2	1.17.4.1
SSA1-Bt_ATDGM	ATP:dGMP phosphotransferase	atp[c] + dgmp[c] => adp[c] + dgdp[c]	(ENSSSA1UGT012465 or ENSSSA1UGT015252 or ENSSSA1UGT024421 or ENSSSA1UGT025952)	ENSSSA1UGT012465 ENSSSA1UGT015252 ENSSSA1UGT024421 ENSSSA1UGT025952	Gmk/GUK1/GMPK	Guanosine Nucleotides Biosynthesis	0	0	3.92	0	2	2.7.4.8
SSA1-Bt_ADSS	adenylosuccinate synthase	gtp[c] + imp[c] + asp-L[c] => gdp[c] + pi[c] + dcamp[c] + 2 h[c]	(ENSSSA1UGT019876 or ENSSSA1UGT005561)	ENSSSA1UGT019876 ENSSSA1UGT005561	PurA/ADSS	Adenosine Ribonucleotides Biosynthesis	0	0	6.14	0	2	6.3.4.4
SSA1-Bt_AAL(fum)	N6-(1,2-dicarboxyethyl)AMP AMP-lyase (fumarate-forming)	dcamp[c] => fum[c] + amp[c]	Earlham_SSA1_SG1_HGAP_000040F_arrow_261226-297277	Earlham_SSA1_SG1_HGAP_000040F_arrow_261226-297277	PurB/ADSL	Adenosine Ribonucleotides Biosynthesis	0	0	1000	0	2	4.3.2.2
SSA1-Bt_ATAM	ATP:AMP phosphotransferase	atp[c] + amp[c] <=> 2 adp[c]	(ENSSSA1UGT020344 or ENSSSA1UGT020654 or ENSSSA1UGT023443 or ENSSSA1UGT028874)	ENSSSA1UGT020344 ENSSSA1UGT020654 ENSSSA1UGT023443 ENSSSA1UGT028874	Adk	Adenosine Ribonucleotides Biosynthesis	0	0	4.66	0	2	2.7.4.3;2.7.4.10
SSA1-Bt_DAOTO	2'-Deoxyadenosine 5'-diphosphate:oxidized-thioredoxin 2'-oxidoreductase	trdrd[c] + adp[c] => dadp[c] + trdox[c] + h2o[c]	(ENSSSA1UGT019965 or ENSSSA1UGT019985 or ENSSSA1UGT026306)	ENSSSA1UGT019965 ENSSSA1UGT019985 ENSSSA1UGT026306	Gmk/GUK1/GMPK	Purine Metabolism	0	0	6.68	0	2	1.17.4.1
SSA1-Bt_DCDT	2'-Deoxycytidine diphosphate:oxidized-thioredoxin 2'-oxidoreductase	trdrd[c] + cdp[c] => dcdp[c] + trdox[c] + h2o[c]	(ENSSSA1UGT019965 or ENSSSA1UGT019985 or ENSSSA1UGT026306)	ENSSSA1UGT019965 ENSSSA1UGT019985 ENSSSA1UGT026307	Gmk/GUK1/GMPK	Purine Metabolism	0	0	6.68	0	2	1.17.4.1
SSA1-Bt_DUDT	2'-Deoxyuridine 5'-diphosphate:oxidized-thioredoxin 2'-oxidoreductase	trdrd[c] + udp[c] => dudp[c] + trdox[c] + h2o[c]	(ENSSSA1UGT019965 or ENSSSA1UGT019985 or ENSSSA1UGT026306)	ENSSSA1UGT019965 ENSSSA1UGT019985 ENSSSA1UGT026308	Gmk/GUK1/GMPK	Purine Metabolism	0	0	6.68	0	2	1.17.4.1
SSA1-Bt_DGTD	2'-Deoxyguanosine 5'-triphosphate diphosphohydrolase	dgtp[c] + h2o[c] => dgmp[c] + ppi[c] + h[c]	(ENSSSA1UGT009500 or ENSSSA1UGT013637 or ENSSSA1UGT014214 or ENSSSA1UGT019682 or ENSSSA1UGT021457 or ENSSSA1UGT025426)	ENSSSA1UGT009500 ENSSSA1UGT013637 ENSSSA1UGT014214 ENSSSA1UGT019682 ENSSSA1UGT021457 ENSSSA1UGT025426	ITPA	Nucleotide Salvage Pathway	0	0	6.75	0	2	3.6.1.19
SSA1-Bt_DCMAH	dCMP aminohydrolase	dcmp[c] + h2o[c] + h[c] => dump[c] + nh4[c]	Earlham_SSA1_SG1_HGAP_000116F_arrow_760669-765618	Earlham_SSA1_SG1_HGAP_000005F_arrow_1242489-1245676	ComEB	Pyrimidine metabolism	0	0	1000	0	2	3.5.4.12
SSA1-Bt_TMDS	thymidylate synthase	dump[c] + mlthf[c] => dhf[c] + dtmp[c]	ENSSSA1UGT024748	ENSSSA1UGT024748	ThyA		0	0	4.29	0	2	2.1.1.45
SSA1-Bt_DTMPK	dTMP kinase	atp[c] + dtmp[c] <=> adp[c] + dtdp[c]	ENSSSA1UGT017814	ENSSSA1UGT017814	Tmk	Pyrimidine Deoxyribonucleotides de novo Biosynthesis-Superpathway	0	0	5.97	0	2	2.7.4.9
SSA1-Bt_ADNK	adenosine kinase	atp[c] + adn[c] <=> adp[c] + amp[c] + h[c]	ENSSSA1UGT017500	ENSSSA1UGT017500		Nucleotide Salvage Pathway	1	-1000	5.86	0	2	2.7.1.20
SSA1-Bt_AMP5N	AMP-5'-nucleotidase	amp[c] + h2o[c] => adn[c] + pi[c]	ENSSSA1UGT030307	ENSSSA1UGT030307		Nucleotide Salvage Pathway	0	0	6.02	0	2	3.1.3.5
SSA1-Bt_DUTNH	dUTP nucleotidohydrolase	dutp[c] + h2o[c] <=> dump[c] + ppi[c] + h[c]	(ENSSSA1UGT007682 or ENSSSA1UGT007859 or ENSSSA1UGT028465)	(ENSSSA1UGT007682 or ENSSSA1UGT007859 or ENSSSA1UGT028465)	ITPA	Pyrimidine metabolism	1	-1000	3.42	0	2	3.6.1.23;3.6.1.19
SSA1-Bt_AMPD	AMP deaminase	amp[c] + h2o[c] + h[c] => imp[c] + nh4[c]	ENSSSA1UGT028959	ENSSSA1UGT028959		Purine metabolism	0	0	5.36	0	2	3.5.4.6
SSA1-Bt_DM_DNAC	Source to allow DNA cytosine to enter system	=> dnac[c]				Souce	0	0	1000	0	2
SSA1-Bt_DM_8AONN	Source to allow 8-Amino-7-oxononanoate to enter system	=> 8aonn[c]				Souce	0	0	1000	0	2
SSA1-Bt_DM_ALA-B	Source to allow beta-Alanine to enter system	=> ala-B[c]				Souce	0	0	1000	0	2
SSA1-Bt_DM_PG160	Source to allow Phosphatidylglycerol to enter system	=> pg160[c]				Souce	0	0	1000	0	2	2.3.1.23 2.3.1.67
SSA1-Bt_DM_OCTAPB	Source to allow Octanoate to enter system	=> octapb[c]				Souce	0	0	1000	0	2	2.8.1.8/2.3.1.181
SSA1-Bt_DM_DNA5MTC	Sink to allow DNA 5-methylcytosine to leave system	dna5mtc[c] =>				Sink	0	0	1000	0	2
SSA1-Bt_DM_DHBPT	Sink to allow 6,7-Dihydrobiopterin to leave system	dhbpt[c] =>				Sink	0	0	1000	0	2
SSA1-Bt_O2tex	oxygen transport via diffusion	o2[e] <=> o2[c]				Transport	1	-1000	1000	0	2
SSA1-Bt_H2Otex	H2O transport via diffusion	h2o[e] <=> h2o[c]				Transport	1	-1000	1000	0	2
SSA1-Bt_CO2tex	CO2 transport via diffusion	co2[c] <=> co2[e]				Transport	1	-1000	1000	0	2
SSA1-Bt_Htex	H transport by diffusion	h[c] <=> h[e]				Transport	1	-1000	1000	0	2
SSA1-Bt_Pitex	phosphate transport via diffusion	pi[c] <=> pi[e]				Transport	1	-1000	1000	0	2
SSA1-Bt_NH4tex	ammonia transport via diffusion	nh4[c] <=> nh4[e]				Transport	1	-1000	1000	0	2
SSA1-Bt_H2Stex	H2S transport via diffusion	h2s[e] <=> h2s[c]				Transport	1	-1000	1000	0	2
SSA1-Bt_Fe2ex	Fe2+ transport via diffusion	fe2[e] <=> fe2[c]				Transport	1	-1000	1000	0	2
SSA1-Bt_Fe3ex	Fe3+ transport via diffusion	fe3[e] <=> fe3[c]				Transport	1	-1000	1000	0	2
SSA1-Bt_UP_fru	Import D-Fructose	fru[e] => fru[c]				Transport	0	0	1000	0	2
SSA1-Bt_UP_glc-D	Import Glucose	glc-D[e] => glc-D[c]				Transport	0	0	1000	0	2
SSA1-Bt_UP_sucr	Import Sucrose	sucr[e] => sucr[c]				Transport	0	0	1000	0	2
SSA1-Bt_UP_hcys-L	Import L-Homocysteine	hcys-L[e] => hcys-L[c]				Transport	0	0	1000	0	2
SSA1-Bt_UP_thmmp	Import Thiamin monophosphate	thmmp[e] => thmmp[c]				Transport	0	0	1000	0	2
SSA1-Bt_UP_thmpp	Import Thiamine diphosphate	thmpp[e] => thmpp[c]				Transport	0	0	1000	0	2
SSA1-Bt_UP_ribflv	Import Riboflavin	ribflv[e] => ribflv[c]				Transport	0	0	1000	0	2
SSA1-Bt_UP_pdx5p	Import Pyridoxine 5-phosphate	pdx5p[e] => pdx5p[c]				Transport	0	0	1000	0	2
SSA1-Bt_UP_nicrnt	Import Nicotinate D-ribonucleotide	nicrnt[e] => nicrnt[c]				Transport	0	0	1000	0	2
SSA1-Bt_EF_dad-5	Export 5'-Deoxyadenosine	dad-5[c] => dad-5[e]				Transport	0	0	1000	0	2
SSA1-Bt_EF_AC	Export Acetate	ac[c] => ac[e]				Transport	0	0	1000	0	2
SSA1-Bt_EF_rhcys	Export S-Ribosyl-L-homocysteine	rhcys[c] => rhcys[e]				Transport	0	0	1000	0	2
SSA1-Bt_EF_meoh	Export Methanol	meoh[c] => meoh[e]				Transport	0	0	1000	0	2
SSA1-Bt_EF_for	Export Formate	for[c] => for[e]				Transport	0	0	1000	0	2
SSA1-Bt_EF_gcald	Export Glycolaldehyde	gcald[c] => gcald[e]				Transport	0	0	1000	0	2
SSA1-Bt_EF_amob	Export S-Adenosyl-4-methylthio-2-oxobutanoate	amob[c] => amob[e]				Transport	0	0	1000	0	2
SSA1-Bt_EF_5drib	Export 5'-Deoxyribose	5drib[c] => 5drib[e]				Transport	0	0	1000	0	2
SSA1-Bt_EF_5mtr	Export 5-Methylthio-D-Ribose	5mtr[c] => 5mtr[e]				Transport	0	0	1000	0	2
SSA1-Bt_EF_btn	Export Biotin	btn[c] => btn[e]				Transport	0	0	1000	0	2
SSA1-Bt_EF_dha	Export Dihydroxyacetone	dha[c] => dha[e]				Transport	0	0	1000	0	2
SSA1-Bt_EF_pppi	Export Inorganic triphosphate	pppi[c] => pppi[e]				Transport	0	0	1000	0	2
SSA1-Bt_EF_gsn	Export Guanosine	gsn[c] => gsn[e]				Transport	0	0	1000	0	2
SSA1-Bt_EF_acald	Export Acetaldehyde	acald[c] => acald[e]				Transport	0	0	1000	0	2
SSA1-Bt_EF_aprut	Export N-Acetylputrescine	aprut[c] => aprut[e]				Transport	0	0	1000	0	2
SSA1-Bt_EF_dcyt	Export Deoxycytidine	dcyt[c] => dcyt[e]				Transport	0	0	1000	0	2
SSA1-Bt_EF_duri	Export Deoxyuridine	duri[c] => duri[e]				Transport	0	0	1000	0	2
SSA1-Bt_EF_fadh2	Export Flavin adenine dinucleotide reduced	fadh2[c] => fadh2[e]				Transport	0	0	1000	0	2
SSA1-Bt_EF_thf	Export 5,6,7,8-Tetrahydrofolate	thf[c] => thf[e]				Transport	0	0	1000	0	2
SSA1-Bt_EF_ala-L	Export L-Alanine	ala-L[c] => ala-L[e]				Transport	0	0	1000	0	2
SSA1-Bt_EF_ARG-L	Export L-Arginine	arg-L[c] => arg-L[e]				Transport	0	0	1000	0	2
SSA1-Bt_EF_ASN-L	Export L-Asparagine	asn-L[c] => asn-L[e]				Transport	0	0	1000	0	2
SSA1-Bt_EF_ASP-L	Export L-Aspartate	asp-L[c] => asp-L[e]				Transport	0	0	1000	0	2
SSA1-Bt_EF_CYS-L	Export L-Cysteine	cys-L[c] => cys-L[e]				Transport	0	0	1000	0	2
SSA1-Bt_EF_GLU-L	Export L-Glutamate	glu-L[c] => glu-L[e]				Transport	0	0	1000	0	2
SSA1-Bt_EF_GLN-L	Export L-Glutamine	gln-L[c] => gln-L[e]				Transport	0	0	1000	0	2
SSA1-Bt_EF_GLY	Export L-Glycine	gly[c] => gly[e]				Transport	0	0	1000	0	2
SSA1-Bt_EF_HIS-L	Export L-Histidine	his-L[c] => his-L[e]				Transport	0	0	1000	0	2
SSA1-Bt_EF_ILE-L	Export L-Isoleucine	ile-L[c] => ile-L[e]				Transport	0	0	1000	0	2
SSA1-Bt_EF_LEU-L	Export L-Leucine	leu-L[c] => leu-L[e]				Transport	0	0	1000	0	2
SSA1-Bt_EF_LYS-L	Export L-Lysine	lys-L[c] => lys-L[e]				Transport	0	0	1000	0	2
SSA1-Bt_EF_MET-L	Export L-Methioniine	met-L[c] => met-L[e]				Transport	0	0	1000	0	2
SSA1-Bt_EF_PHE-L	Export L-Phenylalanine	phe-L[c] => phe-L[e]				Transport	0	0	1000	0	2
SSA1-Bt_EF_PRO-L	Export L-Proline	pro-L[c] => pro-L[e]				Transport	0	0	1000	0	2
SSA1-Bt_EF_SER-L	Export L-Serine	ser-L[c] => ser-L[e]				Transport	0	0	1000	0	2
SSA1-Bt_EF_THR-L	Export L-Threonine	thr-L[c] => thr-L[e]				Transport	0	0	1000	0	2
SSA1-Bt_EF_TRP-L	Export L-Tryptophan	trp-L[c] => trp-L[e]				Transport	0	0	1000	0	2
SSA1-Bt_EF_TYR-L	Export L-Tyrosine	tyr-L[c] => tyr-L[e]				Transport	0	0	1000	0	2
SSA1-Bt_EF_VAL-L	Export L-Valine	val-L[c] => val-L[e]				Transport	0	0	1000	0	2
Bt_GROW	Biomass objective function	0.272 ala-L[c] + 0.382 arg-L[c] + 0.268 asn-L[c] + 0.231 asp-L[c] + 0.154 cys-L[c] + 0.236 gln-L[c] + 0.307 glu-L[c] + 0.236 gly[c] + 0.164 his-L[c] + 0.342 ile-L[c] + 0.562 leu-L[c] + 0.403 lys-L[c] + 0.665 met-L[c] + 0.317 phe-L[c] + 0.266 pro-L[c] + 0.483 ser-L[c] + 0.306 thr-L[c] + 0.084 trp-L[c] + 0.187 tyr-L[c] + 0.328 val-L[c] + 26.709 atp[c] + 26.709 h2o[c] => 26.709 adp[c] + 26.709 h[c] …				Biomass	0	0	1000	1	2
EX_meoh(e)	Exchange Methanol	meoh[e] <=>				Exchange	0	0	1000	0	2
EX_for(e)	Exchange Formate	for[e] <=>				Exchange	0	0	1000	0	2
EX_gcald(e)	Exchange Glycolaldehyde	gcald[e] <=>				Exchange	0	0	1000	0	2
EX_amob(e)	Exchange S-Adenosyl-4-methylthio-2-oxobutanoate	amob[e] <=>				Exchange	0	0	1000	0	2
EX_gsn(e)	Exchange Guanosine	gsn[e] <=>				Exchange	0	0	1000	0	2
EX_rhcys(e)	Exchange S-Ribosyl-L-homocysteine	rhcys[e] <=>				Exchange	0	0	1000	0	2
EX_5drib(e)	Exchange 5'-Deoxyribose	5drib[e] <=>				Exchange	0	0	1000	0	2
EX_5mtr(e)	Exchange 5-Methylthio-D-Ribose	5mtr[e] <=>				Exchange	0	0	1000	0	2
EX_acald(e)	Exchange Acetaldehyde	acald[e] <=>				Exchange	0	0	1000	0	2
EX_aprut(e)	Exchange N-Acetylputrescine	aprut[e] <=>				Exchange	0	0	1000	0	2
EX_btn(e)	Exchange Biotin	btn[e] <=>				Exchange	0	0	1000	0	2
EX_dcyt(e)	Exchange Deoxycytidine	dcyt[e] <=>				Exchange	0	0	1000	0	2
EX_dha(e)	Exchange Dihydroxyacetone	dha[e] <=>				Exchange	0	0	1000	0	2
EX_duri(e)	Exchange Deoxyuridine	duri[e] <=>				Exchange	0	0	1000	0	2
EX_pppi(e)	Exchange Inorganic triphosphate	pppi[e] <=>				Exchange	0	0	1000	0	2
EX_ac(e)	Exchange Acetate	ac[e] <=>				Exchange	0	0	1000	0	2
EX_fadh2(e)	Exchange Flavin adenine dinucleotide reduced	fadh2[e] <=>				Exchange	0	0	1000	0	2
EX_thf(e)	Exchange 5,6,7,8-Tetrahydrofolate	thf[e] <=>				Exchange	0	0	1000	0	2
EX_dad-5(e)	Exchange 5'-Deoxyadenosine	dad-5[e] <=>				Exchange	0	0	1000	0	2
EX_o2(e)	Exchange O2	o2[e] <=>				Exchange	1	-20	1000	0	2
EX_h2o(e)	Exchange H2O	h2o[e] <=>				Exchange	1	-100	1000	0	2
EX_h(e)	Exchange H+	h[e] <=>				Exchange	1	-100	1000	0	2
EX_co2(e)	Exchange CO2	co2[e] <=>				Exchange	1	-100	1000	0	2
EX_fe2(e)	Exchange Fe2+	fe2[e] <=>				Exchange	1	-100	1000	0	2
EX_fe3(e)	Exchange Fe3+	fe3[e] <=>				Exchange	1	-100	1000	0	2
EX_h2s(e)	Exchange H2S	h2s[e] <=>				Exchange	1	-100	1000	0	2
EX_pi(e)	Exchange Phosphate	pi[e] <=>				Exchange	1	-100	1000	0	2
EX_glc-D(e)	Exchange Glucose	glc-D[e] <=>				Exchange	1	-100	1000	0	2
EX_fru(e)	D-Fructose exchange	fru[e] <=>				Exchange	1	-100	1000	0	2
EX_sucr(e)	Exchange Sucrose	sucr[e] <=>				Exchange	1	-100	1000	0	2
EX_nh4(e)	Exchange Ammonium	nh4[e] <=>				Exchange	1	-100	1000	0	2
EX_hcys-L(e)	Exchange L-Homocysteine	hcys-L[e] <=>				Exchange	1	-100	1000	0	2
EX_thmmp(e)	Exchange Thiamin monophosphate	thmmp[e] <=>				Exchange	1	-100	1000	0	2
EX_thmpp(e)	Exchange Thiamine diphosphate	thmpp[e] <=>				Exchange	1	-100	1000	0	2
EX_ribflv(e)	Exchange Riboflavin	ribflv[e] <=>				Exchange	1	-100	1000	0	2
EX_pdx5p(e)	Exchange Pyridoxine 5-phosphate	pdx5p[e] <=>				Exchange	1	-100	1000	0	2
EX_nicrnt(e)	Exchange Nicotinate D-ribonucleotide	nicrnt[e] <=>				Exchange	1	-100	1000	0	2
EX_ala-L(e)	Exchange L-Alanine	ala-L[e] <=>				Exchange	0	0	1000	0	2
EX_arg-L(e)	Exchange L-Arginine	arg-L[e] <=>				Exchange	0	0	1000	0	2
EX_asn-L(e)	Exchange L-Asparagine	asn-L[e] <=>				Exchange	0	0	1000	0	2
EX_asp-L(e)	Exchange L-Aspartate	asp-L[e] <=>				Exchange	0	0	1000	0	2
EX_cys-L(e)	Exchange L-Cysteine	cys-L[e] <=>				Exchange	0	0	1000	0	2
EX_glu-L(e)	Exchange L-Glutamate	glu-L[e] <=>				Exchange	0	0	1000	0	2
EX_gln-L(e)	Exchange L-Glutamine	gln-L[e] <=>				Exchange	0	0	1000	0	2
EX_gly(e)	Exchange L-Glycine	gly[e] <=>				Exchange	0	0	1000	0	2
EX_his-L(e)	Exchange L-Histidine	his-L[e] <=>				Exchange	0	0	1000	0	2
EX_ile-L(e)	Exchange L-Isoleucine	ile-L[e] <=>				Exchange	0	0	1000	0	2
EX_leu-L(e)	Exchange L-Leucine	leu-L[e] <=>				Exchange	0	0	1000	0	2
EX_lys-L(e)	Exchange L-Lysine	lys-L[e] <=>				Exchange	0	0	1000	0	2
EX_met-L(e)	Exchange L-Methionine	met-L[e] <=>				Exchange	0	0	1000	0	2
EX_phe-L(e)	Exchange L-Phenylalanine	phe-L[e] <=>				Exchange	0	0	1000	0	2
EX_pro-L(e)	Exchange L-Proline	pro-L[e] <=>				Exchange	0	0	1000	0	2
EX_ser-L(e)	Exchange L-Serine	ser-L[e] <=>				Exchange	0	0	1000	0	2
EX_thr-L(e)	Exchange L-Threonine	thr-L[e] <=>				Exchange	0	0	1000	0	2
EX_trp-L(e)	Exchange L-Tryptophan	trp-L[e] <=>				Exchange	0	0	1000	0	2
EX_tyr-L(e)	Exchange L-Tyrosine	tyr-L[e] <=>				Exchange	0	0	1000	0	2
EX_val-L(e)	Exchange L-Valine	val-L[e] <=>				Exchange	0	0	1000	0	2

## Sheet: Metabolite List
Abbreviation	Description	Neutral formula	Charged formula	Charge	Compartment	KEGG ID	PubChem ID	ChEBI ID	InChI string	SMILES	HMDB ID
23dhdp[s]	2,3-Dihydrodipicolinate	C7H7NO4	C7H5NO4	-2		C03340
23dhdp[p]	2,3-Dihydrodipicolinate	C7H7NO4	C7H5NO4	-2		C03340
23dhmb[p]	(R)-2,3-Dihydroxy-3-methylbutanoate	C5H10O4	C5H9O4	-1		C04272
23dhmp[p]	(R)-2,3-Dihydroxy-3-methylpentanoate	C6H12O4	C6H11O4	-1		C06007
26dap-LL[s]	LL-2,6-Diaminoheptanedioate	C7H14N2O4	C7H14N2O4	0		C00666
26dap-LL[p]	LL-2,6-Diaminoheptanedioate	C7H14N2O4	C7H14N2O4	0		C00666
2ahbut[p]	(S)-2-Aceto-2-hydroxybutanoate	C6H10O4	C6H9O4	-1		C06006
2cpr5p[p]	1-(2-Carboxyphenylamino)-1-deoxy-D-ribulose 5-phosphate	C12H16NO9P	C12H13NO9P	-3		C01302
2dda7p[p]	2-Dehydro-3-deoxy-D-arabino-heptonate 7-phosphate	C7H13O10P	C7H10O10P	-3		C04691
2dhp[s]	2-Dehydropantoate	C6H10O4	C6H9O4	-1		C00966
2dhp[p]	2-Dehydropantoate	C6H10O4	C6H9O4	-1		C00966
2fe1s[p]	[2Fe-1S] desulfurated iron-sulfur cluster	SFe2	SFe2	2
2fe2s[p]	[2Fe-2S] iron-sulfur cluster	S2Fe2	S2Fe2	2
2ippm[p]	2-Isopropylmaleate	C7H10O4	C7H8O4	-2		C02631
2obut[s]	2-Oxobutanoate	C4H6O3	C4H5O3	-1		C00109
2obut[p]	2-Oxobutanoate	C4H6O3	C4H5O3	-1		C00109
3c2hmp[p]	3-Carboxy-2-hydroxy-4-methylpentanoate	C7H12O5	C7H10O5	-2		C04411
3c3hmp[p]	3-Carboxy-3-hydroxy-4-methylpentanoate	C7H12O5	C7H10O5	-2		C02504
3c4mop[p]	3-Carboxy-4-methyl-2-oxopentanoate	C7H10O5	C7H8O5	-2		C04236
3dhq[p]	3-Dehydroquinate	C7H10O6	C7H9O6	-1		C00944
3dhsk[p]	3-Dehydroshikimate	C7H8O5	C7H7O5	-1		C02637
3ig3p[p]	C-(3-Indolyl)-glycerol 3-phosphate	C11H14NO6P	C11H12NO6P	-2		C03506
3mob[s]	3-Methyl-2-oxobutanoate	C5H8O3	C5H7O3	-1		C00141
3mob[p]	3-Methyl-2-oxobutanoate	C5H8O3	C5H7O3	-1		C00141
3mop[s]	(S)-3-Methyl-2-oxopentanoate	C6H10O3	C6H9O3	-1		C00671
3mop[p]	(S)-3-Methyl-2-oxopentanoate	C6H10O3	C6H9O3	-1		C00671
3psme[p]	5-O-(1-Carboxyvinyl)-3-phosphoshikimate	C10H13O10P	C10H9O10P	-4		C01269
4fe4s[p]	[4Fe-4S] iron-sulfur cluster	S4Fe4	S4Fe4	2
4mop[s]	4-Methyl-2-oxopentanoate	C6H10O3	C6H9O3	-1		C00233
4mop[p]	4-Methyl-2-oxopentanoate	C6H10O3	C6H9O3	-1		C00233
4pasp[p]	4-Phospho-L-aspartate	C4H8NO7P	C4H6NO7P	-2		C03082
5mthf[p]	5-Methyltetrahydrofolate	C20H25N7O6	C20H24N7O6	-1		C00440
6pgc[s]	6-Phospho-D-gluconate	C6H13O10P	C6H10O10P	-3		C00345
6pgc[p]	6-Phospho-D-gluconate	C6H13O10P	C6H10O10P	-3		C00345
6pgl[s]	6-phospho-D-glucono-1,5-lactone	C6H11O9P	C6H9O9P	-2		C01236
6pgl[p]	6-phospho-D-glucono-1,5-lactone	C6H11O9P	C6H9O9P	-2		C01236
accoa[p]	Acetyl-CoA	C23H38N7O17P3S	C23H34N7O17P3S	-4		C00024
adp[s]	ADP	C10H15N5O10P2	C10H12N5O10P2	-3		C00008
adp[p]	ADP	C10H15N5O10P2	C10H12N5O10P2	-3		C00008
aicar[s]	5-Amino-1-(5-Phospho-D-ribosyl)imidazole-4-carboxamide	C9H15N4O8P	C9H13N4O8P	-2		C04677
aicar[p]	5-Amino-1-(5-Phospho-D-ribosyl)imidazole-4-carboxamide	C9H15N4O8P	C9H13N4O8P	-2		C04677
akg[p]	2-Oxoglutarate	C5H6O5	C5H4O5	-2		C00026
alac-S[p]	(S)-2-Acetolactate	C5H8O4	C5H7O4	-1		C06010
ala-L[s]	L-Alanine	C3H7NO2	C3H7NO2	0		C00041
ala-L[p]	L-Alanine	C3H7NO2	C3H7NO2	0		C00041
amet[s]	S-Adenosyl-L-methionine	C15H22N6O5S	C15H23N6O5S	1		C00019
amet[p]	S-Adenosyl-L-methionine	C15H22N6O5S	C15H23N6O5S	1		C00019
amp[s]	AMP	C10H14N5O7P	C10H12N5O7P	-2		C00020
amp[p]	AMP	C10H14N5O7P	C10H12N5O7P	-2		C00020
anth[p]	Anthranilate	C7H7NO2	C7H6NO2	-1		C00108
arg-L[s]	L-Arginine	C6H14N4O2	C6H15N4O2	1		C00062
arg-L[p]	L-Arginine	C6H14N4O2	C6H15N4O2	1		C00062
argsuc[s]	N(omega)-(L-Arginino)succinate	C10H18N4O6	C10H17N4O6	-1		C03406
argsuc[p]	N(omega)-(L-Arginino)succinate	C10H18N4O6	C10H17N4O6	-1		C03406
asn-L[s]	L-Asparagine	C4H8N2O3	C4H8N2O3	0		C00152
asn-L[p]	L-Asparagine	C4H8N2O3	C4H8N2O3	0		C00152
asp-L[s]	L-Aspartate	C4H7NO4	C4H6NO4	-1		C00049
asp-L[p]	L-Aspartate	C4H7NO4	C4H6NO4	-1		C00049
aspsa[p]	L-Aspartate 4-semialdehyde	C4H7NO3	C4H7NO3	0		C00441
atp[p]	ATP	C10H16N5O13P3	C10H12N5O13P3	-4		C00002
bzcarote[p]	beta-Zeacarotene	C40H58	C40H58	0		C05434
cbp[s]	Carbamoyl phosphate	CH4NO5P	CH2NO5P	-2		C00169
cbp[p]	Carbamoyl phosphate	CH4NO5P	CH2NO5P	-2		C00169
chor[s]	chorismate	C10H10O6	C10H8O6	-2		C00251
chor[p]	chorismate	C10H10O6	C10H8O6	-2		C00251
citr-L[s]	L-Citrulline	C6H13N3O3	C6H13N3O3	0		C00327
citr-L[p]	L-Citrulline	C6H13N3O3	C6H13N3O3	0		C00327
clpn160[p]	cardiolipin (tetrahexadecanoyl, n-C16:0)	C73H142O17P2	C73H140O17P2	-2		C05980
co2[s]	CO2	CO2	CO2	0		C00011
co2[p]	CO2	CO2	CO2	0		C00011
coa[s]	Coenzyme A	C21H36N7O16P3S	C21H32N7O16P3S	-4		C00010
coa[p]	Coenzyme A	C21H36N7O16P3S	C21H32N7O16P3S	-4		C00010
ctp[s]	CTP	C9H16N3O14P3	C9H12N3O14P3	-4		C00063
ctp[p]	CTP	C9H16N3O14P3	C9H12N3O14P3	-4		C00063
cys-L[s]	L-Cysteine	C3H7NO2S	C3H7NO2S	0		C00097
cys-L[p]	L-Cysteine	C3H7NO2S	C3H7NO2S	0		C00097
dad-5[s]	5-Deoxyadenosine	C10H13N5O3	C10H13N5O3	0		C05198
dad-5[p]	5-Deoxyadenosine	C10H13N5O3	C10H13N5O3	0		C05198
datp[s]	dATP	C10H16N5O12P3	C10H12N5O12P3	-4		C00131
datp[p]	dATP	C10H16N5O12P3	C10H12N5O12P3	-4		C00131
dctp[s]	dCTP	C9H16N3O13P3	C9H12N3O13P3	-4		C00458
dctp[p]	dCTP	C9H16N3O13P3	C9H12N3O13P3	-4		C00458
dgtp[s]	dGTP	C10H16N5O13P3	C10H12N5O13P3	-4		C00286
dgtp[p]	dGTP	C10H16N5O13P3	C10H12N5O13P3	-4		C00286
dttp[s]	dTTP	C10H17N2O14P3	C10H13N2O14P3	-4		C00459
dttp[p]	dTTP	C10H17N2O14P3	C10H13N2O14P3	-4		C00459
e4p[s]	D-Erythrose 4-phosphate	C4H9O7P	C4H7O7P	-2		C00279
e4p[p]	D-Erythrose 4-phosphate	C4H9O7P	C4H7O7P	-2		C00279
eig3p[p]	D-erythro-1-(Imidazol-4-yl)glycerol 3-phosphate	C6H11N2O6P	C6H9N2O6P	-2		C04666
fad[s]	Flavin adenine dinucleotide oxidized	C27H33N9O15P2	C27H31N9O15P2	-2		C00016
fad[p]	Flavin adenine dinucleotide oxidized	C27H33N9O15P2	C27H31N9O15P2	-2		C00016
fadh2[s]	Flavin adenine dinucleotide reduced	C27H35N9O15P2	C27H33N9O15P2	-2		C01352
fadh2[p]	Flavin adenine dinucleotide reduced	C27H35N9O15P2	C27H33N9O15P2	-2
fe2[s]	Fe2+	Fe	Fe	2		C00023
fe2[p]	Fe2+	Fe	Fe	2		C00023
fmnh2[s]	Reduced FMN	C17H23N4O9P	C17H21N4O9P	-2		C01847
fmnh2[p]	Reduced FMN	C17H23N4O9P	C17H21N4O9P	-2		C01847
frdp[p]	Farnesyl diphosphate	C15H28O7P2	C15H25O7P2	-3		C00448
g3p[p]	Glyceraldehyde 3-phosphate	C3H7O6P	C3H5O6P	-2		C00661
g6p[p]	D-Glucose 6-phosphate	C6H13O9P	C6H11O9P	-2		C00092
ggdp[p]	Geranylgeranyl diphosphate	C20H36O7P2	C20H33O7P2	-3
glc-D[p]	D-Glucose	C6H12O6	C6H12O6	0		C00031
gln-L[p]	L-Glutamine	C5H10N2O3	C5H10N2O3	0		C00064
glu-L[p]	L-Glutamate	C5H9NO4	C5H8NO4	-1		C00025
glutrna[s]	L-Glutamyl-tRNA(Glu)	C5H7NO3R	C5H7NO3R	0		C02987
glutrna[p]	L-Glutamyl-tRNA(Glu)	C5H7NO3R	C5H7NO3R	0		C02987
gly[s]	Glycine	C2H5NO2	C2H5NO2	0		C00037
gly[p]	Glycine	C2H5NO2	C2H5NO2	0		C00037
glyc[p]	Glycerol	C3H8O3	C3H8O3	0		C00116
gtp[s]	GTP	C10H16N5O14P3	C10H12N5O14P3	-4		C00044
gtp[p]	GTP	C10H16N5O14P3	C10H12N5O14P3	-4		C00044
h[s]	H+	H	H	1		C00080
h[p]	H+	H	H	1		C00080
h2o[s]	H2O	H2O	H2O	0		C00001
h2o[p]	H2O	H2O	H2O	0		C00001
hco3[s]	Bicarbonate	CH2O3	CHO3	-1		C00288
hco3[p]	Bicarbonate	CH2O3	CHO3	-1		C00288
hcys-L[s]	L-Homocysteine	C4H9NO2S	C4H9NO2S	0		C00155
hcys-L[p]	L-Homocysteine	C4H9NO2S	C4H9NO2S	0		C00155
hemeO[p]	Heme O	C49H58FeN4O5	C49H56FeN4O5	-2		C15672
his-L[s]	L-Histidine	C6H9N3O2	C6H9N3O2	0		C00135
his-L[p]	L-Histidine	C6H9N3O2	C6H9N3O2	0		C00135
hisp[s]	L-Histidinol phosphate	C6H12N3O4P	C6H11N3O4P	-1		C01100
hisp[p]	L-Histidinol phosphate	C6H12N3O4P	C6H11N3O4P	-1		C01100
hom-L[p]	L-Homoserine	C4H9NO3	C4H9NO3	0		C00263
ile-L[s]	L-Isoleucine	C6H13NO2	C6H13NO2	0		C00407
ile-L[p]	L-Isoleucine	C6H13NO2	C6H13NO2	0		C00407
imacp[p]	3-(Imidazol-4-yl)-2-oxopropyl phosphate	C6H9N2O5P	C6H7N2O5P	-2		C01267
indole[p]	Indole	C8H7N	C8H7N	0		C00463
leu-L[s]	L-Leucine	C6H13NO2	C6H13NO2	0		C00123
leu-L[p]	L-Leucine	C6H13NO2	C6H13NO2	0		C00123
lipopb[p]	lipoate (protein bound)	C8H12OS2	C8H13OS2	1
lycop[p]	Lycopene	C40H56	C40H56	0		C05432
lys-L[p]	L-Lysine	C6H14N2O2	C6H15N2O2	1		C00047
met-L[s]	L-Methionine	C5H11NO2S	C5H11NO2S	0		C00073
met-L[p]	L-Methionine	C5H11NO2S	C5H11NO2S	0		C00073
mlthf[s]	5,10-Methylenetetrahydrofolate	C20H23N7O6	C20H21N7O6	-2		C00143
mlthf[p]	5,10-Methylenetetrahydrofolate	C20H23N7O6	C20H21N7O6	-2		C00143
nad[p]	Nicotinamide adenine dinucleotide	C21H28N7O14P2	C21H26N7O14P2	-1		C00003
nadh[s]	Nicotinamide adenine dinucleotide - reduced	C21H29N7O14P2	C21H27N7O14P2	-2		C00004
nadh[p]	Nicotinamide adenine dinucleotide - reduced	C21H29N7O14P2	C21H27N7O14P2	-2		C00004
nadp[s]	Nicotinamide adenine dinucleotide phosphate	C21H28N7O17P3	C21H25N7O17P3	-3		C00006
nadp[p]	Nicotinamide adenine dinucleotide phosphate	C21H28N7O17P3	C21H25N7O17P3	-3		C00006
nadph[p]	Nicotinamide adenine dinucleotide phosphate - reduced	C21H30N7O17P3	C21H26N7O17P3	-4		C00005
neuspn[p]	Neurosporene	C40H58	C40H58	0		C05431
nh4[s]	Ammonium	H3N	H4N	1		C01342
nh4[p]	Ammonium	H3N	H4N	1		C01342
o2[p]	O2	O2	O2	0		C00007
octapb[p]	octanoate (protein bound)	C8H14O	C8H15O	1
orn[s]	Ornithine	C5H12N2O2	C5H13N2O2	1		C01602
orn[p]	Ornithine	C5H12N2O2	C5H13N2O2	1		C01602
pant-R[s]	(R)-Pantoate	C6H12O4	C6H11O4	-1		C00522
pant-R[p]	(R)-Pantoate	C6H12O4	C6H11O4	-1		C00522
pep[s]	Phosphoenolpyruvate	C3H5O6P	C3H2O6P	-3		C00074
pep[p]	Phosphoenolpyruvate	C3H5O6P	C3H2O6P	-3		C00074
pg160[p]	Phosphatidylglycerol (dihexadecanoyl, n-C16:0)	C38H75O10P1	C38H74O10P1	-1		C00344
phe-L[s]	L-Phenylalanine	C9H11NO2	C9H11NO2	0		C00079
phe-L[p]	L-Phenylalanine	C9H11NO2	C9H11NO2	0		C00079
pheme[s]	Protoheme	C34H32FeN4O4	C34H30FeN4O4	-2		C00032
pheme[p]	Protoheme	C34H32FeN4O4	C34H30FeN4O4	-2		C00032
phom[p]	O-Phospho-L-homoserine	C4H10NO6P	C4H8NO6P	-2		C01102
phpyr[s]	Phenylpyruvate	C9H8O3	C9H7O3	-1		C00166
phpyr[p]	Phenylpyruvate	C9H8O3	C9H7O3	-1		C00166
phytoe[p]	Phytoene	C40H64	C40H64	0		C05413
phytof[p]	Phytofluene	C40H62	C40H62	0		C05414
pi[s]	Phosphate	H3O4P	HO4P	-2		C00009
pi[p]	Phosphate	H3O4P	HO4P	-2		C00009
pphn[s]	Prephenate	C10H10O6	C10H8O6	-2		C00254
pphn[p]	Prephenate	C10H10O6	C10H8O6	-2		C00254
ppi[s]	Diphosphate	H4O7P2	HO7P2	-3		C00013
ppi[p]	Diphosphate	H4O7P2	HO7P2	-3		C00013
pran[p]	N-(5-Phospho-D-ribosyl)anthranilate	C12H16NO9P	C12H13NO9P	-3		C04302
prbamp[p]	1-(5-Phosphoribosyl)-AMP	C15H23N5O14P2	C15H19N5O14P2	-4		C02741
prbatp[p]	1-(5-Phosphoribosyl)-ATP	C15H25N5O20P4	C15H19N5O20P4	-6		C02739
prephytedp[p]	Prephytoene diphosphate	C40H68O7P2	C40H65O7P2	-3		C03427
prfp[p]	1-(5-Phosphoribosyl)-5-[(5-phosphoribosylamino)methylideneamino]imidazole-4-carboxamide	C15H25N5O15P2	C15H21N5O15P2	-4		C04896
prlp[p]	5-[(5-phospho-1-deoxyribulos-1-ylamino)methylideneamino]-1-(5-phosphoribosyl)imidazole-4-carboxamide	C15H25N5O15P2	C15H21N5O15P2	-4		C04916
pro-L[s]	L-Proline	C5H9NO2	C5H9NO2	0		C00148
pro-L[p]	L-Proline	C5H9NO2	C5H9NO2	0		C00148
prpp[p]	5-Phospho-alpha-D-ribose 1-diphosphate	C5H13O14P3	C5H8O14P3	-5		C00119
pydx5p[s]	Pyridoxal 5-phosphate	C8H10NO6P	C8H8NO6P	-2		C00018
pydx5p[p]	Pyridoxal 5-phosphate	C8H10NO6P	C8H8NO6P	-2		C00018
pyr[s]	Pyruvate	C3H4O3	C3H3O3	-1		C00022
pyr[p]	Pyruvate	C3H4O3	C3H3O3	-1		C00022
q8[p]	Ubiquinone-8	C49H74O4	C49H74O4	0		C00399
q8h2[s]	Ubiquinol-8	C49H76O4	C49H76O4	0		C00390
q8h2[p]	Ubiquinol-8	C49H76O4	C49H76O4	0		C00390
r5p[s]	alpha-D-Ribose 5-phosphate	C5H11O8P	C5H9O8P	-2		C00117
r5p[p]	alpha-D-Ribose 5-phosphate	C5H11O8P	C5H9O8P	-2		C00117
ru5p-D[s]	D-Ribulose 5-phosphate	C5H11O8P	C5H9O8P	-2		C00199
ru5p-D[p]	D-Ribulose 5-phosphate	C5H11O8P	C5H9O8P	-2		C00199
ser-L[s]	L-Serine	C3H7NO3	C3H7NO3	0		C00065
ser-L[p]	L-Serine	C3H7NO3	C3H7NO3	0		C00065
skm[p]	Shikimate	C7H10O5	C7H9O5	-1		C00493
skm5p[p]	Shikimate 5-phosphate	C7H11O8P	C7H8O8P	-3		C03175
sl26da[p]	N-Succinyl-LL-2,6-diaminoheptanedioate	C11H18N2O7	C11H16N2O7	-2		C04421
sl2a6o[p]	N-Succinyl-2-L-amino-6-oxoheptanedioate	C11H15NO8	C11H12NO8	-3		C04462
succ[s]	Succinate	C4H6O4	C4H4O4	-2		C00042
succ[p]	Succinate	C4H6O4	C4H4O4	-2		C00042
succoa[s]	Succinyl-CoA	C25H40N7O19P3S	C25H35N7O19P3S	-5		C00091
succoa[p]	Succinyl-CoA	C25H40N7O19P3S	C25H35N7O19P3S	-5		C00091
sufbcd[p]	SufBCD scaffold complex	H8O2S6R	H8O2S6R	0
sufbcd-2fe2s[p]	SufBCD with bound [2Fe-2S] cluster	H6O2S8Fe2R	H4O2S8Fe2R	-2
sufbcd-2fe2s2[p]	SufBCD with two bound [2Fe-2S] clusters	H4O2S10Fe4R	O2S10Fe4R	-4
sufbcd-4fe4s[p]	SufBCD with bound [4Fe-4S] cluster	H6O2S10Fe4R	H4O2S10Fe4R	-2
sufse[p]	SufSE sulfur acceptor complex	HSR	HSR	0
sufsesh[p]	SufSE with bound sulfur	HS2R	HS2R	0
thdp[s]	2,3,4,5-Tetrahydrodipicolinate	C7H9NO4	C7H7NO4	-2		C03972
thdp[p]	2,3,4,5-Tetrahydrodipicolinate	C7H9NO4	C7H7NO4	-2		C03972
thf[s]	5,6,7,8-Tetrahydrofolate	C19H23N7O6	C19H21N7O6	-2		C00101
thf[p]	5,6,7,8-Tetrahydrofolate	C19H23N7O6	C19H21N7O6	-2		C00101
thmpp[s]	Thiamine diphosphate	C12H19N4O7P2S	C12H16N4O7P2S	-2		C00068
thmpp[p]	Thiamine diphosphate	C12H19N4O7P2S	C12H17N4O7P2S	-2		C00068
thr-L[s]	L-Threonine	C4H9NO3	C4H9NO3	0		C00188
thr-L[p]	L-Threonine	C4H9NO3	C4H9NO3	0		C00188
trnaglu[s]	tRNA (Glu)	R	R	0		C01641
trnaglu[p]	tRNA (Glu)	R	R	0		C01641
trp-L[s]	L-Tryptophan	C11H12N2O2	C11H12N2O2	0		C00078
trp-L[p]	L-Tryptophan	C11H12N2O2	C11H12N2O2	0		C00078
tyr-L[s]	L-Tyrosine	C9H11NO3	C9H11NO3	0		C00082
tyr-L[p]	L-Tyrosine	C9H11NO3	C9H11NO3	0		C00082
utp[s]	UTP	C9H15N2O15P3	C9H11N2O15P3	-4		C00075
utp[p]	UTP	C9H15N2O15P3	C9H11N2O15P3	-4		C00075
val-L[s]	L-Valine	C5H11NO2	C5H11NO2	0		C00183
val-L[p]	L-Valine	C5H11NO2	C5H11NO2	0		C00183
zcarote[p]	zeta-Carotene	C40H60	C40H60	0		C05430
acg5sa[p]	N-Acetyl-L-glutamate 5-semialdehyde	C7H11NO4	C7H10NO4	-1		C01250
acg5sa[s]	N-Acetyl-L-glutamate 5-semialdehyde	C7H11NO5	C7H10NO4	-1		C01250
acorn[p]	N2-Acetyl-L-ornithine	C7H14N2O3	C7H14N2O3	0		C00437
acorn[s]	N2-Acetyl-L-ornithine	C7H14N2O3	C7H14N2O3	0		C00437
akg[s]	2-Oxoglutarate	C5H6O5	C5H4O5	-2		C00026
26dap-M[s]	meso-2,6-Diaminoheptanedioate	C7H14N2O4	C7H14N2O4	0		C00680
glu-L[s]	L-Glutamate	C5H9NO4	C5H8NO4	-1		C00025
glu-L[e]	L-Glutamate	C5H9NO4	C5H8NO4	-1		C00025
ile-L[e]	L-Isoleucine	C6H13NO2	C6H13NO2	0		C00407
leu-L[e]	L-Leucine	C6H13NO2	C6H13NO2	0		C00123
2obut[e]	2-Oxobutanoate	C4H6O3	C4H5O3	-1		C00109
1pyr5c[s]	1-Pyrroline-5-carboxylate	C5H7NO2	C5H6NO2	-1		C03912
2fe2s[s]	[2Fe-2S] iron-sulfur cluster	S2Fe2	S2Fe2	2
3pg[s]	3-Phospho-D-glycerate	C3H7O7P	C3H4O7P	-3		C00197
3php[s]	3-Phosphohydroxypyruvate	C3H5O7P	C3H2O7P	-3		C03232
13dpg[s]	3-Phospho-D-glyceroyl phosphate	C3H8O10P2	C3H4O10P2	-4		C00236
2pg[s]	D-Glycerate 2-phosphate	C3H7O7P	C3H4O7P	-3		C00631
2fe1s[s]	[2Fe-1S] desulfurated iron-sulfur cluster	SFe2	SFe2	2
4fe4s[s]	[4Fe-4S] iron-sulfur cluster	S4Fe4	S4Fe4	2
4ppan[s]	D-4-Phosphopantothenate	C9H18NO8P	C9H15NO8P	-3		C03492
4ppcys[s]	N-((R)-4-Phosphopantothenoyl)-L-cysteine	C12H23N2O9PS	C12H20N2O9PS	-3		C04352
10fthf[s]	10-Formyltetrahydrofolate	C20H23N7O7	C20H21N7O7	-2		C00234
5aop[s]	5-Amino-4-oxopentanoate	C5H9NO3	C5H9NO3	0		C00430
5aizc[s]	5-amino-1-(5-phospho-D-ribosyl)imidazole-4-carboxylate	C9H14N3O9P	C9H11N3O9P	-3		C04751
5dpmev[s]	R-5-Diphosphomevalonate	C6H14O10P2	C6H10O10P2	-4		C01143
25aics[s]	(S)-2-[5-Amino-1-(5-phospho-D-ribosyl)imidazole-4-carboxamido]succinate	C13H19N4O12P	C13H15N4O12P	-4		C04823
btn[s]	Biotin	C10H16N2O3S	C10H15N2O3S	-1		C00120
btn[e]	Biotin	C10H16N2O3S	C10H15N2O3S	-1		C00120
5pmev[s]	R-5-Phosphomevalonate	C6H13O7P	C6H10O7P	-3		C01107
6pthp[s]	6-Pyruvoyl-5,6,7,8-tetrahydropterin	C9H11N5O3	C9H11N5O3	0
8aonn[s]	8-Amino-7-oxononanoate	C9H17NO3	C9H17NO3	0		C01092
aacoa[s]	Acetoacetyl-CoA	C25H40N7O18P3S	C25H36N7O18P3S	-4		C00332
ac[s]	Acetate	C2H4O2	C2H3O2	-1		C00033
ac[e]	Acetate	C2H4O2	C2H3O2	-1		C00033
accoa[s]	Acetyl-CoA	C23H38N7O17P3S	C23H34N7O17P3S	-4		C00024
acon-C[s]	cis-Aconitate	C6H6O6	C6H3O6	-3		C00417
adn[s]	Adenosine	C10H13N5O4	C10H13N5O4	0		C00212
ahcys[s]	S-Adenosyl-L-homocysteine	C14H20N6O5S	C14H20N6O5S	0		C00021
ahdt[s]	2-Amino-4-hydroxy-6-(erythro-1,2,3-trihydroxypropyl)dihydropteridine triphosphate	C9H16N5O13P3	C9H12N5O13P3	-4		C04895
air[s]	5-amino-1-(5-phospho-D-ribosyl)imidazole	C8H14N3O7P	C8H12N3O7P	-2		C03373
pg160[s]	Phosphatidylglycerol (dihexadecanoyl, n-C16:0)	C38H75O10P1	C38H74O10P1	-1		C00344
ala-B[s]	beta-Alanine	C3H7NO2	C3H7NO2	0		C00099
ala-L[e]	L-Alanine	C3H7NO2	C3H7NO2	0		C00041
allphn[s]	Allophanate	C2H4N2O3	C2H3N2O3	-1		C01010
amob[s]	S-Adenosyl-4-methylthio-2-oxobutanoate	C15H20N5O6S	C15H19N5O6S	0		C04425
amob[e]	S-Adenosyl-4-methylthio-2-oxobutanoate	C15H20N5O6S	C15H19N5O6S	0		C04425
rnam[s]	N-Ribosylnicotinamide	C11H14N2O5	C11H15N2O5	1		C03150
octapb[s]	octanoate (protein bound)	C8H14O	C8H15O	1
arg-L[e]	L-Arginine	C6H14N4O2	C6H15N4O2	1		C00062
asn-L[e]	L-Asparagine	C4H8N2O3	C4H8N2O3	0		C00152
asp-L[e]	L-Aspartate	C4H7NO4	C4H6NO4	-1		C00049
atp[s]	ATP	C10H16N5O13P3	C10H12N5O13P3	-4		C00002
h2s[s]	Hydrogen sulfide	H2S	H2S	0		C00283
h2s[e]	Hydrogen sulfide	H2S	H2S	0		C00283
cbasp[s]	N-Carbamoyl-L-aspartate	C5H8N2O5	C5H6N2O5	-2		C00438
cdp[s]	CDP	C9H15N3O11P2	C9H12N3O11P2	-3		C00112
cit[s]	Citrate	C6H8O7	C6H5O7	-3		C00158
cmp[s]	CMP	C9H14N3O8P	C9H12N3O8P	-2		C00055
co2[e]	CO2	CO2	CO2	0		C00011
cpppg3[s]	Coproporphyrinogen III	C36H44N4O8	C36H40N4O8	-4		C03263
cyst-L[s]	L-Cystathionine	C7H14N2O4S	C7H14N2O4S	0		C02291
o2[s]	O2	O2	O2	0		C00007
o2[e]	O2	O2	O2	0		C00007
dadp[s]	dADP	C10H15N5O9P2	C10H12N5O9P2	-3		C00206
dann[s]	7,8-Diaminononanoate	C9H20N2O2	C9H21N2O2	1		C01037
dcamp[s]	N6-(1,2-Dicarboxyethyl)-AMP	C14H18N5O11P	C14H14N5O11P	-4		C03794
dcdp[s]	dCDP	C9H15N3O10P2	C9H12N3O10P2	-3		C00705
dcmp[s]	dCMP	C9H14N3O7P	C9H12N3O7P	-2		C00239
f1p[s]	D-Fructose 1-phosphate	C6H13O9P	C6H11O9P	-2		C02976
dgdp[s]	dGDP	C10H15N5O10P2	C10H12N5O10P2	-3		C00361
dgmp[s]	dGMP	C10H14N5O7P	C10H12N5O7P	-2		C00362
dha[s]	Dihydroxyacetone	C3H6O3	C3H6O3	0		C00184
dha[e]	Dihydroxyacetone	C3H6O3	C3H6O3	0		C00184
dhap[s]	Dihydroxyacetone phosphate	C3H7O6P	C3H5O6P	-2		C00111
dhbpt[s]	6,7-Dihydrobiopterin	C9H13N5O3	C9H13N5O3	0		C00268
dhf[s]	7,8-Dihydrofolate	C19H21N7O6	C19H19N7O6	-2		C00415
dhnpt[s]	Dihydroneopterin	C9H13N5O4	C9H13N5O4	0		C04874
dhpt[s]	Dihydropteroate	C14H14N6O3	C14H13N6O3	-1		C00921
dhor-S[s]	(S)-Dihydroorotate	C5H6N2O4	C5H5N2O4	-1		C00337
lys-L[s]	L-Lysine	C6H14N2O2	C6H15N2O2	1		C00047
lys-L[e]	L-Lysine	C6H14N2O2	C6H15N2O2	1		C00047
dna5mtc[s]	DNA 5-methylcytosine	C10H16N3O7PR2	C10H16N3O7PR2	0		C02967
dnac[s]	DNA cytosine	C9H14N3O7PR2	C9H14N3O7PR2	0		C00856
dmpp[s]	Dimethylallyl diphosphate	C5H12O7P2	C5H9O7P2	-3		C00235
dpcoa[s]	Dephospho-CoA	C21H35N7O13P2S	C21H33N7O13P2S	-2		C00882
dtbt[s]	Dethiobiotin	C10H18N2O3	C10H17N2O3	-1		C01909
dtdp[s]	dTDP	C10H16N2O11P2	C10H13N2O11P2	-3		C00363
dtmp[s]	dTMP	C10H15N2O8P	C10H13N2O8P	-2		C00364
dudp[s]	dUDP	C9H14N2O11P2	C9H11N2O11P2	-3		C01346
dump[s]	dUMP	C9H13N2O8P	C9H11N2O8P	-2		C00365
dnad[s]	Deamino-NAD+	C21H27N6O15P2	C21H24N6O15P2	-2		C00857
dutp[s]	dUTP	C9H15N2O14P3	C9H11N2O14P3	-4		C00460
f6p[s]	D-Fructose 6-phosphate	C6H13O9P	C6H11O9P	-2		C00085
fadh2[e]	Flavin adenine dinucleotide reduced	C27H35N9O15P2	C27H33N9O15P2	-2		C01352
fdp[s]	D-Fructose 1,6-bisphosphate	C6H14O12P2	C6H10O12P2	-4		C00354
fe2[e]	Fe2+	Fe	Fe	2		C00023
fe3[s]	Fe3+	Fe	Fe	3		C14819
fe3[e]	Fe3+	Fe	Fe	3		C14819
fgam[s]	N2-Formyl-N1-(5-phospho-D-ribosyl)glycinamide	C8H15N2O9P	C8H13N2O9P	-2		C04376
ficytc[s]	Ferricytochrome c	C42H44FeN8O8S2R4	C42H46FeN8O8S2R4	3		C00125
fmn[s]	FMN	C17H21N4O9P	C17H19N4O9P	-2		C00061
focytc[s]	Ferrocytochrome c	C42H44FeN8O8S2R4	C42H46FeN8O8S2R4	2		C00126
fol[s]	Folate	C19H19N7O6	C19H17N7O6	-2		C00504
for[s]	Formate	CH2O2	CH1O2	-1		C00058
for[e]	Formate	CH2O2	CH1O2	-1		C00058
fpram[s]	2-(Formamido)-N1-(5-phospho-D-ribosyl)acetamidine	C8H16N3O8P	C8H15N3O8P	-1		C04640
fprica[s]	5-Formamido-1-(5-phospho-D-ribosyl)imidazole-4-carboxamide	C10H15N4O9P	C10H13N4O9P	-2		C04734
frdp[s]	Farnesyl diphosphate	C15H28O7P2	C15H25O7P2	-3		C00448
fru[s]	D-Fructose	C6H12O6	C6H12O6	0		C00095
fru[e]	D-Fructose	C6H12O6	C6H12O6	0		C00095
fum[s]	Fumarate	C4H4O4	C4H2O4	-2		C00122
g1p[s]	D-Glucose 1-phosphate	C6H13O9P	C6H11O9P	-2		C00103
g3p[s]	Glyceraldehyde 3-phosphate	C3H7O6P	C3H5O6P	-2		C00661
g6p[s]	D-Glucose 6-phosphate	C6H13O9P	C6H11O9P	-2		C00092
gar[s]	N1-(5-Phospho-D-ribosyl)glycinamide	C7H15N2O8P	C7H14N2O8P	-1		C03838
thmmp[s]	Thiamin monophosphate	C12H17N4O4PS	C12H16N4O4PS	-1		C01081
thmmp[e]	Thiamin monophosphate	C12H17N4O4PS	C12H16N4O4PS	-1		C01081
gdp[s]	GDP	C10H15N5O11P2	C10H12N5O11P2	-3		C00035
ggdp[s]	Geranylgeranyl diphosphate	C20H36O7P2	C20H33O7P2	-3
glc-D[s]	D-Glucose	C6H12O6	C6H12O6	0		C00031
glc-D[e]	D-Glucose	C6H12O6	C6H12O6	0		C00031
gln-L[s]	L-Glutamine	C5H10N2O3	C5H10N2O3	0		C00064
gln-L[e]	L-Glutamine	C5H10N2O3	C5H10N2O3	0		C00064
glu5sa[s]	L-Glutamate 5-semialdehyde	C5H9NO3	C5H9NO3	0		C01165
glucys[s]	gamma-L-Glutamyl-L-cysteine	C8H14N2O5S	C8H13N2O5S	-1		C00669
thmpp[e]	Thiamine diphosphate	C12H19N4O7P2S	C12H16N4O7P2S	-3		C00068
gly[e]	Glycine	C2H5NO2	C2H5NO2	0		C00037
glyald[s]	D-Glyceraldehyde	C3H6O3	C3H6O3	0		C00577
glycogen[s]	glycogen	C6H10O5	C6H10O5	0		C00182
gmp[s]	GMP	C10H14N5O8P	C10H12N5O8P	-2		C00144
grdp[s]	Geranyl diphosphate	C10H20O7P2	C10H17O7P2	-3		C00341
gsn[s]	Guanosine	C10H13N5O5	C10H13N5O5	0		C00387
gsn[e]	Guanosine	C10H13N5O5	C10H13N5O5	0		C00387
gthox[s]	Oxidized glutathione	C20H32N6O12S2	C20H30N6O12S2	-2		C00127
gthrd[s]	Reduced glutathione	C10H17N3O6S	C10H16N3O6S	-1		C00051
h[e]	H+	H	H	1		C00080
h2o[e]	H2O	H2O	H2O	0		C00001
h2o2[s]	Hydrogen peroxide	H2O2	H2O2	0		C00027
hcys-L[e]	L-Homocysteine	C4H9NO2S	C4H9NO2S	0		C00155
thbpt[s]	Tetrahydrobiopterin	C9H15N5O3	C9H15N5O3	0		C00272
hemeA[s]	Heme A	C49H56FeN4O6	C49H56FeN4O6	0		C15670
hemeO[s]	Heme O	C49H58FeN4O5	C49H56FeN4O5	-2		C15672
his-L[e]	L-Histidine	C6H9N3O2	C6H9N3O2	0		C00135
histd[s]	L-Histidinol	C6H11N3O	C6H12N3O	1		C00860
hmbil[s]	Hydroxymethylbilane	C40H46N4O17	C40H38N4O17	-8		C01024
hmgcoa[s]	Hydroxymethylglutaryl-CoA	C27H44N7O20P3S	C27H39N7O20P3S	-5		C00356
icit[s]	Isocitrate	C6H8O7	C6H5O7	-3		C00311
imp[s]	IMP	C10H13N4O8P	C10H11N4O8P	-2		C00130
ipdp[s]	Isopentenyl diphosphate	C5H12O7P2	C5H9O7P2	-3		C00129
iscs[s]	IscS sulfur acceptor protein	HSR	HSR	0
iscssh[s]	IscS with bound sulfur	HS2R	HS2R	0
iscu[s]	IscU scaffold protein	H8O2S6R	H8O2S6R	0
iscu-2fe2s[s]	IscU with bound [2Fe-2S] cluster	H6O2S8Fe2R	H4O2S8Fe2R	-2
iscu-2fe2s2[s]	IscU with two bound [2Fe-2S] clusters	H4O2S10Fe4R	O2S10Fe4R	-4
iscu-4fe4s[s]	IscU with bound [4Fe-4S] cluster	H6O2S10Fe4R	H4O2S10Fe4R	-2
cys-L[e]	L-Cysteine	C3H7NO2S	C3H7NO2S	0		C00097
methf[s]	5,10-Methenyltetrahydrofolate	C20H22N7O6	C20H20N7O6	-1		C00445
mal-L[s]	L-Malate	C4H6O5	C4H4O5	-2		C00149
met-L[e]	L-Methionine	C5H11NO2S	C5H11NO2S	0		C00073
mev-R[s]	R-Mevalonate	C6H12O4	C6H11O4	-1		C00418
nac[s]	Nicotinate	C6H5NO2	C6H4NO2	-1		C00253
nad[s]	Nicotinamide adenine dinucleotide	C21H28N7O14P2	C21H26N7O14P2	-1		C00003
nadph[s]	Nicotinamide adenine dinucleotide phosphate - reduced	C21H30N7O17P3	C21H26N7O17P3	-4		C00005
nh4[e]	Ammonium	H3N	H4N	1		C01342
nicrns[s]	Nicotinate D-ribonucleoside	C11H14NO6	C11H13NO6	0		C05841
nmn[s]	Nicotinamide D-ribonucleotide	C11H15N2O8P	C11H14N2O8P	-1		C00455
ncam[s]	Nicotinamide	C6H6N2O	C6H6N2O	0		C00153
nicrnt[s]	Nicotinate D-ribonucleotide	C11H15NO9P	C11H12NO9P	-2		C01185
nicrnt[e]	Nicotinate D-ribonucleotide	C11H15NO9P	C11H12NO9P	-2		C01185
oaa[s]	Oxaloacetate	C4H4O5	C4H2O5	-2		C00036
orot[s]	Orotate	C5H4N2O4	C5H3N2O4	-1		C00295
orot5p[s]	Orotidine 5-phosphate	C10H13N2O11P	C10H10N2O11P	-3		C01103
pan4p[s]	Pantetheine 4-phosphate	C11H23N2O7PS	C11H21N2O7PS	-2		C01134
pdx5p[s]	Pyridoxine 5-phosphate	C8H12NO6P	C8H10NO6P	-2		C00627
pdx5p[e]	Pyridoxine 5-phosphate	C8H12NO6P	C8H10NO6P	-2		C00627
phe-L[e]	L-Phenylalanine	C9H11NO2	C9H11NO2	0		C00079
pi[e]	Phosphate	H3O4P	HO4P	-2		C00009
pnto-R[s]	(R)-Pantothenate	C9H17NO5	C9H16NO5	-1		C00864
ppbng[s]	Porphobilinogen	C10H14N2O4	C10H13N2O4	-1		C00931
ppi[e]	Diphosphate	H4O7P2	HO7P2	-3		C00013
pppg9[s]	Protoporphyrinogen IX	C34H40N4O4	C34H38N4O4	-2		C01079
pppi[s]	Inorganic triphosphate	H5O10P3	HO10P3	-4		C00536
pppi[e]	Inorganic triphosphate	H5O10P3	HO10P3	-4		C00536
pram[s]	5-Phospho-beta-D-ribosylamine	C5H12NO7P	C5H11NO7P	-1		C03090
ppp9[s]	Protoporphyrin	C34H34N4O4	C34H32N4O4	-2		C02191
pro-L[e]	L-Proline	C5H9NO2	C5H9NO2	0		C00148
prpp[s]	5-Phospho-alpha-D-ribose 1-diphosphate	C5H13O14P3	C5H8O14P3	-5		C00119
pser-L[s]	O-Phospho-L-serine	C3H8NO6P	C3H6NO6P	-2		C01005
pyam5p[s]	Pyridoxamine 5-phosphate	C8H13N2O5P	C8H12N2O5P	-1		C00647
pydam[s]	Pyridoxamine	C8H12N2O2	C8H13N2O2	1		C00534
pydx[s]	Pyridoxal	C8H9NO3	C8H9NO3	0		C00250
pydxn[s]	Pyridoxine	C8H11NO3	C8H11NO3	0		C00314
q9[s]	Ubiquinone-9	C54H82O4	C54H82O4	0		C01967
q9h2[s]	Ubiquinol-9	C54H84O4	C54H84O4	0		C00390
rbflvrd[s]	Reduced riboflavin	C17H22N4O6	C17H22N4O6	0		C01007
tyr-L[e]	L-Tyrosine	C9H11NO3	C9H11NO3	0		C00082
ribflv[s]	Riboflavin	C17H20N4O6	C17H20N4O6	0		C00255
ribflv[e]	Riboflavin	C17H20N4O6	C17H20N4O6	0		C00255
s17bp[s]	Sedoheptulose 1,7-bisphosphate	C7H16O13P2	C7H12O13P2	-4		C00447
s7p[s]	Sedoheptulose 7-phosphate	C7H15O10P	C7H13O10P	-2		C05382
ser-L[e]	L-Serine	C3H7NO3	C3H7NO3	0		C00065
sucr[s]	Sucrose	C12H22O11	C12H22O11	0		C00089
sucr[e]	Sucrose	C12H22O11	C12H22O11	0		C00089
thf[e]	5,6,7,8-Tetrahydrofolate	C19H23N7O6	C19H21N7O6	-2		C00101
dad-5[e]	5-Deoxyadenosine	C10H13N5O3	C10H13N5O3	0		C05198
thr-L[e]	L-Threonine	C4H9NO3	C4H9NO3	0		C00188
trdox[s]	Oxidized thioredoxin	X	X	0		C00343
trdrd[s]	Reduced thioredoxin	XH2	XH2	0		C00342
udp[s]	UDP	C9H14N2O12P2	C9H11N2O12P2	-3		C00015
udpg[s]	UDP glucose	C15H24N2O17P2	C15H22N2O17P2	-2		C00029
ump[s]	UMP	C9H13N2O9P	C9H11N2O9P	-2		C00105
uppg3[s]	Uroporphyrinogen III	C40H44N4O16	C40H36N4O16	-8		C01051
urea[s]	Urea	CH4N2O	CH5N2O	1		C00086
xmp[s]	Xanthosine 5-phosphate	C10H13N4O9P	C10H11N4O9P	-2		C00655
xu5p-D[s]	D-Xylulose 5-phosphate	C5H11O8P	C5H9O8P	-2		C00231
val-L[e]	L-Valine	C5H11NO2	C5H11NO2	0		C00183
trp-L[e]	L-Tryptophan	C11H12N2O2	C11H12N2O2	0		C00078
dhpt[s]	Dihydropteroate	C14H14N6O3	C14H13N6O3	-1		C00921
dhpt[e]	Dihydropteroate	C14H14N6O3	C14H13N6O3	-1		C00921
