# Supplementary material for: In silico prediction of candidate gene targets for the management of African cassava whitefly (Bemisia tabaci, SSA1-SG1), a key vector of viruses causing cassava brown streak disease
Source: PeerJ. 2024 Feb 23;12:e16949. doi: 10.7717/peerj.16949 (PMC10896082; doi:10.7717/peerj.16949)
Supplement: Supplemental Information 6 [file peerj-12-16949-s006.xlsx]

## Sheet: Amino Acid Composition
All frequencies are given in percent.
Domain: Data
	Ala	Cys	Asp	Glu	Phe	Gly	His	Ile	Lys	Leu	Met	Asn	Pro	Gln	Arg	Ser	Thr	Val	Trp	Tyr	Total
ENSSSA1UGT000009	5	0.357143	4.64286	3.92857	5.35714	7.85714	4.64286	7.85714	7.5	9.64286	1.78571	3.21429	2.85714	5.35714	3.92857	7.14286	5.71429	7.5	1.42857	4.28571	280
ENSSSA1UGT000010	2.94118	3.52941	2.94118	5.88235	2.94118	7.05882	4.11765	8.23529	4.70588	5.88235	0	2.94118	7.05882	7.64706	13.5294	10.5882	2.94118	2.94118	2.35294	1.76471	170
ENSSSA1UGT000014	7.53111	2.35756	3.53635	4.3222	4.25671	5.04257	3.07793	4.45318	3.99476	9.75769	2.42305	4.78062	7.40013	5.10806	5.17354	8.90635	6.02489	8.84086	0.654879	2.35756	1527
ENSSSA1UGT000017	6.42857	8.57143	2.85714	2.14286	5.71429	2.85714	6.42857	2.14286	12.8571	5.71429	3.57143	3.57143	4.28571	5.71429	6.42857	13.5714	1.42857	5	0	0.714286	140
ENSSSA1UGT000018	4.45434	2.33853	2.11581	4.5657	4.12027	3.2294	4.12027	6.4588	6.01336	8.35189	2.89532	5.45657	5.45657	4.34298	10.245	9.79955	6.90423	5.79065	1.11359	2.22717	898
ENSSSA1UGT000021	4.68384	6.32319	2.26386	7.33802	5.46448	3.66901	8.35285	2.88837	6.79157	4.7619	2.10773	3.35675	4.52771	3.35675	4.7619	14.676	10.6948	2.8103	0.312256	0.858704	1281
ENSSSA1UGT000023	4.89396	2.93638	1.79445	5.22023	5.22023	3.42577	5.87276	4.73083	3.75204	11.4192	2.28385	4.24144	4.0783	5.70962	8.80914	8.80914	7.17781	4.40457	2.12072	3.09951	613
ENSSSA1UGT000024	4.56334	4.24862	2.04563	4.64201	6.29426	3.93391	4.48466	5.66483	4.87805	11.9591	2.12431	4.01259	2.36035	5.97954	5.03541	10.8576	6.68765	4.24862	1.96696	4.01259	1271
ENSSSA1UGT000025	7.26496	2.62515	1.5873	3.663	5.06716	2.1978	4.45665	7.44811	5.18926	11.4774	1.64835	5.43346	4.1514	3.60195	9.34066	7.93651	5.98291	7.50916	0.732601	2.6862	1638
ENSSSA1UGT000026	8.21429	2.14286	5.71429	2.85714	5.71429	7.14286	1.42857	3.57143	1.78571	11.7857	0.714286	5.35714	7.5	4.64286	4.28571	8.21429	5.71429	8.57143	1.07143	3.57143	280
ENSSSA1UGT000028	5.25773	2.57732	5.36082	3.19588	7.62887	6.08247	1.4433	6.70103	4.3299	11.0309	1.4433	5.56701	5.56701	3.09278	5.97938	7.1134	5.7732	6.80412	0.721649	4.3299	970
ENSSSA1UGT000036	3.28152	4.4905	2.41796	3.79965	7.25389	3.79965	3.28152	7.59931	3.97237	13.4715	0.863558	3.79965	6.73575	3.97237	11.0535	6.56304	4.31779	4.83592	0.690846	3.79965	579
ENSSSA1UGT000039	11.4754	0	3.27869	4.91803	0	6.55738	1.63934	8.19672	11.4754	16.3934	0	8.19672	4.91803	4.91803	6.55738	1.63934	4.91803	4.91803	0	0	61
ENSSSA1UGT000040	5.69948	1.29534	5.18135	9.32642	4.40415	6.21762	2.33161	2.33161	7.77202	9.84456	3.88601	5.44041	5.69948	5.95855	3.62694	6.47668	5.44041	5.44041	0.518135	3.10881	386
ENSSSA1UGT000042	7.78443	2.69461	8.08383	4.49102	6.28743	5.68862	3.29341	5.98802	7.18563	6.88623	1.1976	4.49102	2.69461	3.29341	3.59281	6.28743	6.58683	8.38323	2.39521	2.69461	334
ENSSSA1UGT000046	4.94062	1.90024	5.08314	4.7981	4.98812	5.17815	2.66033	6.4133	4.94062	9.83373	1.52019	6.31829	5.65321	2.80285	4.08551	10.7838	5.6057	6.74584	2.18527	3.56295	2105
ENSSSA1UGT000052	6.63265	2.55102	5.10204	6.63265	5.10204	3.57143	1.02041	5.10204	11.2245	12.7551	1.53061	5.10204	4.59184	5.10204	2.04082	4.59184	9.69388	4.08163	0	3.57143	196
ENSSSA1UGT000053	6.72854	1.39211	3.24826	5.91647	5.22042	3.94432	2.66821	2.43619	5.68445	11.7169	1.62413	5.80046	9.28074	7.19258	3.48028	9.28074	4.9884	5.10441	1.50812	2.78422	862
ENSSSA1UGT000054	6.61896	1.61002	3.22004	6.08229	6.08229	4.47227	3.57782	4.83005	3.39893	10.7335	1.43113	4.11449	3.9356	4.83005	8.05009	8.58676	6.08229	7.69231	1.25224	3.39893	559
ENSSSA1UGT000065	5.91716	0.591716	9.46746	11.8343	6.50888	6.50888	0.591716	7.10059	5.91716	6.50888	5.91716	5.32544	2.36686	2.36686	4.14201	4.14201	7.10059	4.73373	0	2.95858	169
ENSSSA1UGT000067	3.76344	0.537634	11.2903	5.37634	2.15054	6.98925	3.22581	5.37634	5.91398	12.9032	2.15054	4.30108	3.22581	4.30108	4.83871	10.2151	4.83871	5.91398	0.537634	2.15054	186
ENSSSA1UGT000068	5.43971	5.53037	1.54125	5.89302	3.35449	6.25567	2.71985	3.98912	8.70354	5.25839	0.453309	5.16772	2.99184	5.07706	10.9701	13.0553	7.43427	2.44787	1.08794	2.62919	1103
ENSSSA1UGT000069	5.27132	3.41085	4.96124	4.03101	3.72093	5.27132	2.0155	6.04651	8.21705	10.2326	3.25581	4.34109	3.87597	4.18605	4.8062	10.8527	6.20155	7.5969	0.465116	1.24031	645
ENSSSA1UGT000071	8.07453	0.621118	4.96894	10.559	6.21118	4.96894	2.48447	6.21118	7.45342	8.07453	1.86335	4.96894	3.10559	1.24224	2.48447	9.93789	3.10559	9.93789	1.24224	2.48447	161
ENSSSA1UGT000072	3.38733	2.79823	6.03829	4.56554	7.06922	3.68189	3.53461	7.06922	7.36377	9.86745	2.50368	6.48012	3.68189	3.68189	4.71281	7.8056	2.94551	6.48012	1.7673	4.56554	679
ENSSSA1UGT000073	3.45125	3.19241	2.761	7.42019	4.65919	5.0906	1.55306	6.55738	10.2675	8.71441	1.20794	5.43572	3.19241	5.43572	10.0949	7.59275	4.74547	4.22778	1.12166	3.27869	1159
ENSSSA1UGT000074	8.76351	2.64106	3.36134	5.16206	4.68187	6.0024	3.60144	3.0012	4.92197	14.2857	2.16086	3.36134	4.32173	2.88115	8.04322	8.04322	4.56182	5.7623	0.840336	3.60144	833
ENSSSA1UGT000075	8.70787	1.40449	3.93258	4.77528	3.37079	6.74157	1.1236	4.77528	8.98876	10.3933	0.842697	7.86517	2.52809	5.05618	5.89888	8.42697	7.58427	2.52809	0.280899	4.77528	356
ENSSSA1UGT000076	8.16832	2.72277	3.21782	3.46535	1.73267	4.70297	5.44554	2.47525	4.70297	12.8713	0.247525	1.23762	10.6436	6.43564	13.1188	5.44554	5.19802	3.9604	2.72277	1.48515	404
ENSSSA1UGT000077	4.85714	1.42857	6.28571	8.57143	6.57143	4.57143	2.85714	5.71429	4.57143	8.85714	1.71429	4.28571	6.57143	5.14286	8	5.42857	4.28571	6.28571	1.71429	2.28571	350
ENSSSA1UGT000078	4.90677	2.55152	4.21982	3.82728	7.45829	4.90677	2.45339	5.10304	6.47694	11.9725	2.45339	6.18253	3.63101	3.53288	3.53288	10.6968	4.7105	6.18253	1.07949	4.12169	1019
ENSSSA1UGT000081	3.3046	4.31034	3.16092	4.31034	7.75862	3.44828	2.58621	6.75287	8.18966	11.6379	2.87356	5.74713	4.31034	3.73563	4.74138	6.75287	4.88506	5.17241	1.58046	4.74138	696
ENSSSA1UGT000082	12.9032	2.15054	4.30108	2.15054	4.30108	4.30108	2.15054	4.30108	4.30108	9.67742	3.22581	2.15054	6.45161	3.22581	3.22581	12.9032	9.67742	4.30108	1.07527	3.22581	93
ENSSSA1UGT000091	4.60123	0.920245	7.36196	6.44172	6.74847	5.52147	1.22699	7.36196	7.05521	9.81595	1.53374	4.60123	6.13497	4.29448	4.90798	8.58896	3.98773	5.21472	1.84049	1.84049	326
ENSSSA1UGT000097	5.89744	2.05128	4.87179	10	3.33333	6.41026	1.79487	3.07692	6.92308	11.0256	2.30769	6.15385	3.84615	4.61538	8.71795	5.38462	4.87179	2.5641	2.30769	3.84615	390
ENSSSA1UGT000098	7.75076	1.82371	6.68693	3.95137	5.92705	5.16717	3.03951	4.71125	6.07903	10.3343	0.911854	2.43161	8.05471	5.16717	6.07903	6.53495	6.07903	5.77508	0.911854	2.58359	658
ENSSSA1UGT000099	7.03364	3.0581	3.66972	3.66972	6.42202	7.03364	4.58716	4.89297	6.72783	10.7034	1.52905	3.66972	4.89297	2.14067	5.19878	9.78593	3.97554	5.19878	2.14067	3.66972	327
ENSSSA1UGT000100	4.49827	3.80623	2.07612	3.80623	8.65052	5.53633	2.76817	4.49827	3.46021	11.7647	2.42215	3.80623	4.15225	7.95848	3.46021	13.1488	6.57439	3.46021	2.07612	2.07612	289
ENSSSA1UGT000104	5.20446	4.46097	1.6109	2.3544	5.20446	7.18711	3.71747	3.59356	4.33705	7.80669	0.991326	2.72615	5.57621	3.22181	8.55019	14.1264	9.29368	4.7088	2.85006	2.47831	807
ENSSSA1UGT000106	4.40367	1.46789	2.93578	6.05505	1.83486	5.87156	2.93578	3.30275	7.15596	4.95413	1.10092	2.75229	10.4587	4.58716	5.50459	10.8257	12.4771	5.13761	0.733945	5.50459	545
ENSSSA1UGT000112	7.0632	2.60223	2.23048	2.60223	11.1524	5.57621	3.71747	11.1524	3.71747	11.1524	2.23048	4.83271	2.60223	1.48699	5.20446	7.43494	5.20446	4.08922	0.743494	5.20446	269
ENSSSA1UGT000114	8.6747	2.89157	1.68675	2.6506	4.33735	6.26506	5.06024	7.22892	2.89157	10.8434	2.89157	2.6506	5.3012	1.68675	5.54217	8.6747	5.78313	8.19277	1.92771	4.81928	415
ENSSSA1UGT000117	5.40721	3.27103	1.66889	3.13752	4.00534	4.53939	3.27103	5.80774	6.27503	12.4833	4.13885	3.07076	4.53939	5.47397	5.40721	12.1495	6.87583	5.2737	1.40187	1.8024	1498
ENSSSA1UGT000119	5.71429	2.85714	3.80952	5.2381	6.66667	6.19048	3.33333	3.80952	7.61905	9.52381	1.42857	6.19048	6.66667	4.7619	6.19048	5.71429	2.85714	5.71429	1.42857	4.28571	210
ENSSSA1UGT000125	2.40964	7.22892	4.81928	1.20482	4.81928	3.61446	1.20482	4.81928	6.0241	10.8434	1.20482	8.43373	9.63855	2.40964	10.8434	8.43373	6.0241	4.81928	1.20482	0	83
ENSSSA1UGT000126	5.5914	4.51613	2.58065	5.16129	6.66667	6.02151	2.7957	4.94624	6.66667	8.3871	0.430108	5.16129	3.65591	5.16129	9.67742	9.89247	3.44086	4.30108	1.93548	3.01075	465
ENSSSA1UGT000130	6.32111	2.65487	3.79267	4.93047	6.57396	5.18331	2.90771	7.45891	9.1024	9.73451	2.2756	5.94185	3.66625	3.91909	4.93047	6.70038	4.17193	4.5512	0.505689	4.67762	791
ENSSSA1UGT000139	6.04797	6.67362	2.39833	3.54536	5.21376	3.54536	3.54536	4.48384	5.21376	8.8634	1.04275	4.37956	2.18978	3.44108	10.6361	11.9917	5.83942	3.75391	3.54536	3.64964	959
ENSSSA1UGT000141	5.13141	2.75344	3.12891	2.25282	4.8811	4.50563	1.37672	4.00501	5.38173	7.25907	1.25156	3.37922	9.26158	1.62703	9.63705	15.3942	11.3892	2.62829	2.37797	2.37797	799
ENSSSA1UGT000142	5.82329	2.00803	2.20884	4.61847	8.63454	3.21285	2.81124	6.2249	7.83133	11.4458	3.61446	5.02008	2.81124	4.41767	4.41767	7.42972	5.82329	7.02811	2.00803	2.61044	498
ENSSSA1UGT000145	3.5	1.5	5	4	5.25	5.25	2	6.75	6.25	10.5	2.75	8	4.25	3.75	5.25	8.5	2.75	7.75	2.25	4.75	400
ENSSSA1UGT000148	0.925926	4.16667	1.38889	4.16667	5.55556	4.16667	3.24074	5.09259	5.09259	12.963	0.462963	2.77778	5.55556	9.72222	9.72222	10.1852	6.94444	4.62963	2.31481	0.925926	216
ENSSSA1UGT000149	5.32609	2.82609	5.86957	5.86957	4.45652	3.69565	1.84783	4.13043	8.36957	11.5217	2.3913	5.76087	4.8913	3.36957	4.67391	13.587	5.65217	3.36957	0.543478	1.84783	920
ENSSSA1UGT000160	4.49438	5.29695	2.88925	3.37079	6.26003	4.33387	3.21027	4.81541	7.54414	9.95185	0.802568	6.26003	2.08668	2.24719	8.02568	11.0754	6.09952	5.45746	2.88925	2.88925	623
ENSSSA1UGT000161	5.52995	1.6129	3.91705	5.52995	4.83871	5.76037	2.53456	7.8341	11.0599	10.5991	2.76498	4.14747	4.14747	3.22581	4.37788	7.14286	6.45161	4.60829	0.691244	3.22581	434
ENSSSA1UGT000166	5.99647	2.1164	4.05644	4.7619	6.52557	3.52734	2.1164	5.64374	6.34921	9.17108	1.94004	5.11464	5.11464	3.1746	5.99647	7.76014	4.7619	7.93651	2.29277	5.64374	567
ENSSSA1UGT000167	3.56083	2.37389	2.37389	5.34125	6.82493	3.56083	1.48368	8.01187	5.34125	11.276	2.07715	5.34125	5.34125	2.37389	2.67062	10.3858	8.60534	5.93472	1.18694	5.93472	337
ENSSSA1UGT000168	5.46763	3.45324	3.02158	3.02158	6.04317	5.32374	4.17266	5.03597	4.89209	9.64029	0.863309	5.46763	6.04317	4.89209	8.05755	10.2158	4.31655	6.04317	1.58273	2.44604	695
ENSSSA1UGT000174	6.43478	1.73913	4.26087	8.08696	3.56522	3.04348	1.3913	5.65217	8.43478	8.08696	1.13043	4.95652	8.6087	3.73913	2.17391	13.913	5.65217	5.65217	1.30435	2.17391	1150
ENSSSA1UGT000175	7.32759	1.2931	5.60345	7.32759	6.89655	3.01724	1.72414	6.46552	8.18966	7.75862	1.2931	6.89655	3.01724	4.31034	3.01724	10.3448	3.44828	9.05172	0	3.01724	232
ENSSSA1UGT000176	3.11284	8.94942	2.33463	3.89105	3.89105	7.393	2.72374	3.11284	5.05837	6.61479	0.389105	7.00389	3.50195	4.66926	10.8949	13.6187	4.66926	1.94553	4.66926	1.55642	257
ENSSSA1UGT000178	5.6701	2.83505	2.83505	4.63918	7.21649	3.86598	1.54639	5.41237	7.98969	12.1134	1.03093	4.89691	3.09278	3.09278	8.50515	8.24742	5.15464	5.92784	1.80412	4.12371	388
ENSSSA1UGT000179	5.11628	1.39535	3.25581	3.72093	6.51163	4.18605	2.7907	6.97674	9.30233	11.1628	1.86047	4.18605	4.65116	0.930233	8.37209	11.1628	3.72093	6.04651	0.930233	3.72093	215
ENSSSA1UGT000182	6.0462	1.69837	4.34783	7.54076	3.73641	3.80435	2.85326	4.75543	5.84239	10.6658	1.63043	5.16304	6.79348	4.14402	5.50272	8.35598	5.16304	6.99728	1.42663	3.53261	1472
ENSSSA1UGT000184	2.95359	1.89873	9.70464	10.7595	5.06329	4.43038	3.16456	7.80591	10.1266	6.75105	0.843882	3.79747	7.80591	3.5865	1.68776	4.85232	4.00844	4.43038	2.1097	4.21941	474
ENSSSA1UGT000188	7.05128	0	5.76923	9.61538	5.12821	4.48718	0.641026	1.28205	7.69231	8.33333	1.28205	4.48718	2.5641	14.1026	9.61538	8.33333	5.76923	1.92308	0.641026	1.28205	156
ENSSSA1UGT000191	3.85233	3.04976	3.04976	6.58106	8.1862	5.45746	2.56822	4.6549	5.77849	9.14928	1.28411	6.26003	5.77849	4.81541	4.97592	8.34671	5.77849	4.97592	1.76565	3.69181	623
ENSSSA1UGT000194	5.14019	3.36449	5.14019	6.07477	4.11215	7.28972	3.92523	5.3271	5.88785	9.81308	1.58879	4.6729	4.95327	3.36449	5.51402	7.28972	4.39252	8.2243	1.21495	2.71028	1070
ENSSSA1UGT000202	5.45723	2.50737	3.68732	5.60472	6.48968	7.07965	3.24484	2.80236	2.0649	9.73451	0.737463	3.09735	8.99705	6.34218	13.5693	6.63717	3.24484	5.89971	0.737463	2.0649	678
ENSSSA1UGT000207	10.3448	2.80172	1.72414	4.09483	4.31034	7.32759	2.37069	4.09483	6.46552	8.40517	1.07759	2.37069	8.83621	2.15517	12.5	7.32759	5.38793	4.52586	2.37069	1.50862	464
ENSSSA1UGT000208	6.12795	0.942761	5.25253	5.85859	4.51178	6.73401	2.0202	4.64646	8.61953	8.28283	1.3468	4.10774	5.52189	4.0404	4.44444	11.2458	8.28283	5.05051	0.40404	2.55892	1485
ENSSSA1UGT000210	5.65584	6.13718	1.80505	5.89651	6.61853	2.88809	4.45247	3.97112	7.46089	7.94224	0.481348	4.33213	3.2491	5.77617	8.06258	11.071	4.93381	4.69314	1.56438	3.00842	831
ENSSSA1UGT000211	3.57724	3.73984	1.13821	3.41463	4.87805	3.41463	3.90244	7.31707	7.80488	13.6585	2.92683	3.41463	4.71545	4.71545	6.01626	9.5935	6.01626	5.52846	1.13821	3.08943	615
ENSSSA1UGT000215	10.0791	2.37154	4.34783	6.52174	4.94071	8.69565	1.3834	7.50988	7.70751	7.50988	1.58103	4.54545	3.75494	2.7668	3.35968	6.32411	4.94071	9.09091	0.988142	1.58103	506
ENSSSA1UGT000217	13.5057	2.29885	5.17241	4.31034	5.17241	9.48276	3.16092	6.03448	4.88506	7.75862	2.29885	4.88506	4.02299	2.58621	3.44828	7.75862	4.5977	6.32184	0.574713	1.72414	348
ENSSSA1UGT000219	3.2419	5.23691	3.49127	3.74065	4.98753	5.48628	4.48878	5.23691	4.73815	6.98254	1.99501	5.48628	4.2394	2.49377	10.7232	11.2219	6.48379	3.74065	3.49127	2.49377	401
ENSSSA1UGT000221	3.30073	3.05623	2.93399	3.91198	6.60147	3.05623	3.05623	6.72372	7.09046	8.43521	0.977995	5.13447	4.27873	5.62347	8.19071	11.0024	5.74572	5.13447	2.81174	2.93399	818
ENSSSA1UGT000222	4.93066	1.77196	7.55008	7.70416	2.15716	4.00616	2.38829	4.00616	7.16487	7.08783	2.23421	6.00924	6.8567	6.16333	6.16333	11.7874	3.85208	4.46841	1.30971	2.38829	1298
ENSSSA1UGT000225	4.25532	3.03951	3.79939	7.75076	4.86322	6.68693	2.43161	6.231	9.57447	4.86322	1.51976	5.6231	2.12766	3.79939	10.1824	8.05471	6.99088	3.34347	0.759878	4.10334	658
ENSSSA1UGT000227	8.91089	1.9802	2.47525	7.92079	4.9505	2.9703	0.990099	6.93069	7.92079	10.396	3.9604	4.45545	3.9604	6.43564	4.45545	5.44554	3.46535	6.93069	0.990099	4.45545	202
ENSSSA1UGT000228	7.18232	4.78821	2.02578	3.68324	4.60405	4.78821	4.23573	3.49908	5.89319	6.814	0.368324	4.23573	6.99816	3.31492	8.83978	11.6022	7.36648	4.78821	2.20994	2.76243	543
ENSSSA1UGT000231	8.09859	1.40845	5.6338	8.4507	6.69014	3.16901	3.16901	4.57746	10.5634	10.2113	2.8169	2.46479	4.92958	4.57746	2.46479	7.39437	4.22535	4.57746	0.704225	3.87324	284
ENSSSA1UGT000236	7.12531	0.2457	1.9656	5.40541	0.737101	3.4398	4.6683	2.7027	6.63391	2.7027	0.2457	0.737101	18.6732	2.457	2.457	6.63391	3.6855	21.3759	0.4914	7.61671	407
ENSSSA1UGT000237	5.36913	12.0805	4.69799	6.04027	2.68456	13.4228	4.02685	2.68456	4.69799	0.671141	1.34228	6.71141	2.01342	4.02685	10.7383	9.39597	3.3557	2.01342	0	4.02685	149
ENSSSA1UGT000238	2.7907	5.46512	1.74419	4.88372	5	6.39535	3.48837	4.4186	9.4186	6.39535	0.813953	5.81395	3.13953	5.23256	13.0233	10.5814	4.18605	3.72093	1.27907	2.2093	860
ENSSSA1UGT000240	3.27869	4.91803	6.01093	4.37158	7.10383	10.3825	3.82514	3.82514	6.55738	12.0219	1.63934	3.82514	4.91803	0.546448	3.27869	3.27869	7.10383	7.65027	1.63934	3.82514	183
ENSSSA1UGT000242	5.23139	0	3.42052	5.23139	6.03622	8.65191	4.22535	4.82897	5.83501	2.41449	1.00604	4.62777	12.4748	3.82294	3.21932	10.4628	3.62173	10.0604	0.201207	4.62777	497
ENSSSA1UGT000243	2.43161	3.95137	1.82371	3.64742	6.99088	3.34347	3.64742	8.20669	5.77508	12.462	3.03951	2.43161	5.77508	5.77508	3.34347	9.42249	7.59878	4.86322	2.12766	3.34347	329
ENSSSA1UGT000245	5.01567	0.940439	3.76176	7.52351	4.07524	5.64263	1.25392	7.21003	11.2853	6.58307	2.19436	4.38871	4.07524	3.44828	7.21003	5.95611	4.38871	7.21003	2.50784	5.32915	319
ENSSSA1UGT000246	4.13123	2.30863	1.70109	3.15917	6.80437	4.25273	3.52369	8.38396	6.92588	11.9077	3.15917	6.07533	3.28068	4.49575	4.73876	9.35601	6.07533	6.31835	0.850547	2.55164	823
ENSSSA1UGT000247	5.36013	2.34506	4.43886	5.44389	5.10888	4.94137	3.01508	5.69514	5.52764	14.6566	2.26131	6.1139	5.27638	2.59631	5.69514	7.95645	6.1139	4.10385	0.921273	2.42881	1194
ENSSSA1UGT000249	4.39684	5.18602	2.14205	4.39684	5.52424	3.26945	3.60767	5.63698	5.07328	10.7103	0.901917	5.07328	4.2841	3.83315	7.32807	11.274	4.17136	6.42616	1.91657	4.8478	887
ENSSSA1UGT000250	5.25502	1.70015	4.79134	6.18238	2.93663	5.40958	2.93663	5.87326	4.48223	14.9923	2.93663	6.95518	4.9459	3.24575	5.25502	9.11901	5.25502	5.10046	0.927357	1.70015	647
ENSSSA1UGT000253	6.17978	1.87266	2.99625	3.93258	7.6779	6.17978	2.43446	5.99251	6.74157	11.6105	2.43446	4.68165	2.80899	3.74532	2.43446	12.3596	4.30712	5.80524	2.05993	3.74532	534
ENSSSA1UGT000260	6.01719	1.05062	4.48902	4.87106	4.96657	4.20248	3.91595	5.34862	6.20821	12.6074	1.52818	3.4384	7.35435	3.53391	5.92168	7.8319	4.96657	7.06781	2.38777	2.29226	1047
ENSSSA1UGT000265	6.79612	1.94175	3.39806	2.91262	3.8835	1.94175	4.36893	6.79612	6.79612	10.1942	2.42718	2.42718	4.36893	5.33981	7.76699	8.25243	6.79612	6.79612	3.39806	3.39806	206
ENSSSA1UGT000267	6.69145	1.48699	1.67286	1.48699	2.41636	3.71747	2.7881	4.64684	6.69145	8.55019	1.85874	3.34572	7.62082	4.46097	11.71	13.0112	7.99257	5.57621	2.60223	1.67286	538
ENSSSA1UGT000268	6.45724	2.79232	3.4904	5.2356	5.41012	6.1082	4.88656	4.71204	3.66492	9.5986	0.52356	4.71204	5.93368	4.53752	11.1693	8.726	3.31588	5.2356	1.04712	2.44328	573
ENSSSA1UGT000269	8.77531	1.63934	3.27869	5.78592	1.92864	11.4754	4.72517	2.4108	3.08582	7.81099	0.385728	2.7001	9.9325	4.8216	15.3327	6.55738	3.56798	4.33944	0.48216	0.96432	1037
ENSSSA1UGT000272	4.96689	3.31126	2.98013	6.95364	5.62914	3.31126	2.31788	4.30464	4.96689	7.28477	3.64238	7.61589	6.29139	10.2649	6.29139	7.28477	6.62252	3.31126	0.331126	2.31788	302
ENSSSA1UGT000273	5.18784	2.68336	2.86225	4.29338	6.08229	3.22004	1.9678	7.33453	6.79785	8.58676	2.68336	5.36673	2.86225	4.47227	7.69231	12.7013	5.00894	6.26118	1.9678	1.9678	559
ENSSSA1UGT000274	4.51389	2.60417	4.34028	5.90278	9.80903	3.99306	2.95139	5.03472	5.90278	12.1528	0.868056	4.25347	5.20833	2.77778	5.12153	8.50694	5.46875	6.77083	1.21528	2.60417	1152
ENSSSA1UGT000276	6.19919	1.82927	5.4878	6.91057	3.86179	3.04878	2.84553	5.0813	8.53659	11.0772	1.52439	5.89431	5.18293	3.96341	4.26829	8.02846	6.50407	5.89431	1.21951	2.64228	984
ENSSSA1UGT000278	5.828	0.923952	5.11727	10.8742	2.84293	3.76688	2.1322	5.11727	9.66596	9.66596	2.77186	4.19332	5.25942	5.18834	6.04122	6.46766	4.90405	5.47264	1.0661	2.70078	1407
ENSSSA1UGT000280	4.8433	3.27635	0.997151	1.85185	5.55556	2.849	2.849	9.11681	6.83761	12.6781	2.99145	3.27635	5.41311	4.8433	4.5584	9.97151	7.83476	5.55556	1.7094	2.99145	702
ENSSSA1UGT000282	9.53437	2.66075	5.54324	7.76053	6.20843	2.88248	2.66075	4.43459	6.87361	9.09091	2.88248	3.99113	4.43459	3.32594	4.87805	8.64745	3.54767	7.76053	1.10865	1.77384	451
ENSSSA1UGT000283	6.7696	1.18765	4.3943	8.4323	1.90024	5.93824	3.91924	3.68171	4.15677	9.38242	2.019	5.81948	4.27553	6.65083	9.73872	8.55107	4.86936	5.22565	0.593824	2.49406	842
ENSSSA1UGT000284	5.14706	3.52941	3.97059	4.41176	5.58824	6.47059	2.79412	5.14706	6.02941	7.79412	1.17647	3.67647	6.02941	3.08824	10.1471	11.7647	3.38235	6.91176	1.32353	1.61765	680
ENSSSA1UGT000285	3.85542	4.33735	3.13253	2.40964	4.09639	4.33735	7.46988	6.50602	4.81928	9.87952	0.963855	4.33735	6.74699	4.81928	9.15663	11.0843	3.85542	4.33735	1.68675	2.16867	415
ENSSSA1UGT000286	6.72269	2.10084	7.56303	4.62185	6.30252	3.78151	2.10084	4.62185	7.56303	9.2437	1.68067	5.88235	5.04202	2.94118	7.56303	6.30252	6.30252	4.62185	2.10084	2.94118	238
ENSSSA1UGT000287	6.47482	4.12034	4.25114	5.7554	4.05494	8.6985	2.28908	2.61609	5.03597	7.97907	1.17724	3.0739	4.57816	3.46632	10.2681	10.2027	3.66252	7.32505	2.35448	2.61609	1529
ENSSSA1UGT000288	5.0813	2.84553	1.42276	2.64228	4.6748	2.84553	1.21951	4.47154	6.70732	14.0244	5.0813	2.64228	4.47154	3.65854	8.53659	12.8049	6.30081	4.47154	3.04878	3.04878	492
ENSSSA1UGT000289	3.57143	3.78151	3.36134	7.56303	5.67227	2.73109	2.31092	5.46218	8.82353	9.66387	3.15126	6.09244	5.2521	4.83193	4.62185	8.61345	3.9916	6.72269	1.05042	2.73109	476
ENSSSA1UGT000290	3.77358	2.26415	2.64151	3.58491	6.98113	3.20755	2.83019	7.73585	7.54717	10.1887	2.83019	5.84906	3.20755	5.4717	6.41509	9.81132	5.4717	6.03774	1.69811	2.45283	530
ENSSSA1UGT000293	3.80952	9.04762	2.38095	4.28571	7.61905	4.28571	3.33333	3.80952	5.2381	8.09524	0.952381	4.28571	3.80952	5.2381	9.04762	14.2857	3.33333	2.85714	2.85714	1.42857	210
ENSSSA1UGT000294	6.1674	2.64317	5.72687	5.28634	7.48899	7.04846	2.64317	6.60793	7.92952	11.4537	0.881057	2.64317	5.72687	2.20264	4.84581	8.37004	4.84581	3.52423	0.881057	3.0837	227
ENSSSA1UGT000300	3.86819	2.5788	6.01719	7.73639	4.44126	4.58453	2.86533	3.29513	7.02006	8.16619	1.7192	6.16046	10.4585	3.29513	5.30086	12.3209	4.87106	2.72206	0.429799	2.149	698
ENSSSA1UGT000307	7.94521	3.0137	3.28767	3.83562	5.75342	5.20548	2.73973	5.47945	5.75342	10.137	0.273973	2.73973	6.84932	4.93151	10.411	8.49315	4.10959	5.47945	0.821918	2.73973	365
ENSSSA1UGT000309	7.09593	1.97109	6.04468	9.19842	3.81078	5.78187	2.36531	4.20499	7.75296	6.5703	0.65703	4.07359	5.38765	4.59921	5.78187	10.3811	5.38765	6.4389	0.394218	2.1025	761
ENSSSA1UGT000311	4.02075	3.37224	8.0415	5.70687	4.79896	3.37224	3.76135	5.44747	6.87419	8.43061	2.85344	5.05837	5.83658	4.53956	5.31777	6.87419	4.02075	4.92866	0.648508	6.09598	771
ENSSSA1UGT000314	3.63636	1.81818	2.42424	4.84848	9.69697	2.42424	6.66667	5.45455	9.09091	9.69697	0.606061	5.45455	4.84848	2.42424	6.06061	10.9091	1.21212	7.87879	0.606061	4.24242	165
ENSSSA1UGT000316	11.2583	0.662252	0	0	0	7.28477	7.94702	3.31126	0	5.96026	0.662252	0.662252	17.2185	0.662252	11.9205	9.93377	7.28477	7.94702	6.62252	0.662252	151
ENSSSA1UGT000319	3.93795	3.10263	2.50597	5.36993	7.75656	3.57995	2.86396	7.75656	8.23389	14.2005	2.98329	5.01193	4.65394	4.05728	4.77327	6.20525	4.05728	4.41527	2.50597	2.02864	838
ENSSSA1UGT000322	3.7	3.9	2.8	3	5.9	6.3	3.9	5.9	4.6	10	0.8	3.7	4.2	4.3	11.1	9.2	5.4	6.6	1.7	3	1000
ENSSSA1UGT000323	4.2735	6.83761	5.12821	9.40171	5.12821	7.69231	5.12821	3.4188	6.83761	7.69231	1.7094	0.854701	5.12821	5.12821	11.9658	7.69231	0.854701	2.5641	0.854701	1.7094	117
ENSSSA1UGT000336	3.01205	2.00803	4.41767	5.62249	8.23293	5.22088	4.61847	6.0241	8.83534	9.83936	1.60643	4.41767	4.01606	2.20884	5.02008	10.241	4.61847	5.42169	0.60241	4.01606	498
ENSSSA1UGT000338	3.61613	2.36439	6.11961	5.70236	4.86787	5.98053	2.08623	5.4242	6.25869	10.5702	2.22531	4.45063	4.72879	4.58971	6.25869	10.4312	5.4242	6.9541	0.556328	1.39082	719
ENSSSA1UGT000340	6.12648	2.17391	4.1502	4.94071	8.39921	5.23715	2.47036	5.73123	7.90514	10.7708	1.3834	4.8419	4.64427	4.44664	5.33597	5.92885	4.64427	7.21344	0.494071	3.16206	1012
ENSSSA1UGT000343	7.28863	1.74927	4.37318	4.66472	3.79009	8.45481	1.74927	4.37318	4.08163	11.9534	3.49854	3.49854	2.91545	4.08163	6.12245	5.8309	7.28863	7.58017	1.16618	5.53936	343
ENSSSA1UGT000345	5.51181	1.5748	5.6243	8.09899	4.61192	5.39933	2.92463	6.74916	6.86164	12.261	1.34983	4.27447	4.8369	4.04949	4.38695	7.64904	4.8369	6.07424	1.23735	1.68729	889
ENSSSA1UGT000349	4.97854	1.80258	4.80687	4.63519	7.63948	4.97854	2.66094	6.43777	5.83691	12.618	2.74678	4.03433	4.54936	4.63519	6.35193	6.60944	4.63519	4.80687	1.6309	3.60515	1165
ENSSSA1UGT000350	7.10634	2.91411	5.47035	7.00409	3.73211	4.9591	2.35174	5.26585	5.1636	13.4458	2.14724	3.83436	4.7546	4.03885	4.39673	10.4294	4.03885	5.87935	0.817996	2.24949	1956
ENSSSA1UGT000351	3.90071	3.4279	3.4279	4.96454	7.91962	3.30969	2.36407	6.02837	8.03783	11.3475	1.30024	5.43735	3.5461	5.08274	5.79196	7.32861	6.14657	7.0922	0.945626	2.60047	846
ENSSSA1UGT000355	3.2345	1.88679	6.19946	7.81671	6.19946	4.04313	3.50404	5.39084	11.0512	10.2426	2.42588	7.27763	2.42588	3.2345	7.81671	5.39084	3.50404	5.92992	0.539084	1.88679	371
ENSSSA1UGT000357	5.35948	2.0915	3.79085	4.96732	5.22876	4.8366	3.13725	8.23529	4.44444	10.9804	2.61438	4.57516	5.22876	3.39869	5.75163	7.32026	6.14379	6.66667	1.04575	4.18301	765
ENSSSA1UGT000358	8.29545	2.27273	1.47727	2.5	4.43182	5.90909	1.02273	3.63636	5.45455	5.56818	1.70455	1.59091	7.5	1.81818	14.3182	15	10.4545	4.31818	1.25	1.47727	880
ENSSSA1UGT000364	4.55408	1.80266	5.59772	8.06452	2.46679	8.15939	1.99241	6.35674	9.29791	7.59013	2.27704	3.79507	2.65655	5.02846	8.06452	5.50285	3.79507	7.49526	2.46679	3.03605	1054
ENSSSA1UGT000366	1.75439	6.14035	2.63158	3.50877	3.50877	5.26316	7.01754	3.50877	7.01754	7.01754	0	10.5263	6.14035	7.01754	7.89474	5.26316	4.38596	7.01754	0.877193	3.50877	114
ENSSSA1UGT000367	6.86813	3.47985	2.65568	4.30403	4.67033	6.22711	3.38828	5.03663	4.30403	8.05861	0.549451	3.2967	5.86081	3.93773	12.8205	9.43223	5.21978	5.58608	1.55678	2.74725	1092
ENSSSA1UGT000371	2.67176	2.29008	1.52672	2.67176	7.25191	3.43511	2.67176	7.63359	11.8321	8.77863	3.43511	6.87023	4.19847	4.19847	8.01527	11.0687	4.58015	3.81679	2.29008	0.763359	262
ENSSSA1UGT000372	5.91873	1.06007	2.12014	1.06007	6.71378	15.5477	1.06007	2.91519	1.32509	2.73852	0.265018	6.27208	14.1343	5.38869	2.82686	12.1025	9.4523	4.5053	0.706714	3.88693	1132
ENSSSA1UGT000377	8.22072	1.8018	1.23874	2.47748	1.23874	6.19369	2.59009	1.91441	5.63063	7.65766	2.25225	3.04054	10.1351	3.37838	13.964	13.6261	7.43243	3.94144	1.57658	1.68919	888
ENSSSA1UGT000378	3.11943	6.23886	2.58467	4.63458	4.45633	3.83244	4.63458	5.34759	5.34759	8.11052	0.713012	5.08021	3.38681	4.99109	10.9626	13.5472	4.27807	3.92157	2.31729	2.49554	1122
ENSSSA1UGT000382	5.60748	2.18069	8.72274	4.36137	3.73832	5.60748	1.55763	6.54206	6.54206	8.41121	2.49221	3.73832	5.60748	3.11526	6.23053	5.919	6.54206	7.78816	0.934579	4.36137	321
ENSSSA1UGT000383	5.13158	1.57895	5.78947	5.26316	6.97368	3.68421	2.23684	6.18421	7.36842	12.5	2.10526	5.65789	4.86842	2.5	5.65789	7.63158	4.07895	5.92105	1.44737	3.42105	760
ENSSSA1UGT000384	11.3569	2.94985	3.09735	6.26844	2.0649	7.89086	2.43363	1.69617	3.17109	5.97345	0.442478	2.94985	9.95575	4.27729	12.3894	10.3245	5.89971	3.9823	1.32743	1.54867	1356
ENSSSA1UGT000386	11.5242	6.3197	2.23048	1.11524	2.97398	2.60223	5.57621	3.71747	1.85874	10.7807	2.60223	1.85874	16.7286	5.20446	3.71747	11.5242	5.20446	2.97398	0	1.48699	269
ENSSSA1UGT000389	6.04027	2.90828	3.80313	7.38255	6.04027	5.48098	2.23714	5.14541	6.04027	11.745	1.78971	3.80313	4.58613	4.47427	6.59955	6.26398	4.69799	5.92841	1.23043	3.80313	894
ENSSSA1UGT000393	5.06257	2.90102	3.2992	4.94881	5.91581	3.12856	3.2992	7.33788	5.46075	13.1968	1.9909	5.6314	4.09556	4.60751	5.00569	8.64619	5.51763	6.20023	0.910125	2.84414	1758
ENSSSA1UGT000395	4.88048	2.78884	1.09562	2.88845	4.28287	4.18327	2.78884	5.87649	6.1753	10.4582	3.38645	4.98008	5.67729	4.38247	9.66135	10.1594	6.0757	6.2749	1.49402	2.49004	1004
ENSSSA1UGT000396	4.99168	2.49584	4.49251	6.3228	6.3228	5.82363	0.665557	6.15641	5.99002	9.65058	0.831947	4.82529	6.98835	2.49584	4.32612	7.98669	5.99002	8.15308	1.33111	4.15973	601
ENSSSA1UGT000398	5.53398	2.52427	3.49515	4.36893	4.36893	7.37864	3.49515	5.24272	4.75728	8.05825	2.03883	5.53398	6.1165	4.36893	5.63107	9.80583	6.50485	6.50485	0.970874	3.30097	1030
ENSSSA1UGT000400	3.9959	4.5082	2.45902	3.79098	7.27459	4.71311	2.66393	7.47951	7.37705	10.2459	1.02459	5.63525	3.38115	3.27869	6.96721	10.5533	5.32787	4.61066	1.7418	2.97131	976
ENSSSA1UGT000403	5.67929	0.556793	6.57016	7.57238	2.33853	6.12472	2.11581	4.34298	5.56793	8.90869	2.22717	3.78619	4.78842	4.5657	7.34967	11.4699	6.68151	6.57016	1.22494	1.55902	898
ENSSSA1UGT000404	3.13725	3.52941	1.96078	4.70588	3.52941	4.70588	2.7451	7.05882	7.45098	7.84314	0	6.66667	1.56863	6.66667	10.5882	8.23529	6.27451	6.66667	3.13725	3.52941	255
ENSSSA1UGT000407	6.43478	4	2.78261	2.43478	3.82609	5.73913	1.91304	5.73913	4.52174	8.86957	1.3913	3.82609	5.73913	2.78261	10.7826	12	6.43478	6.08696	1.91304	2.78261	575
ENSSSA1UGT000409	4.28571	11.4286	2.85714	8.57143	2.85714	2.85714	1.42857	10	1.42857	10	4.28571	4.28571	1.42857	4.28571	7.14286	8.57143	7.14286	2.85714	4.28571	0	70
ENSSSA1UGT000410	2.73082	3.90117	1.82055	2.47074	7.6723	2.86086	1.95059	7.93238	6.37191	15.7347	2.08062	3.38101	3.90117	5.46164	6.63199	9.23277	5.07152	5.20156	2.3407	3.25098	769
ENSSSA1UGT000411	3.80411	1.70529	8.39528	9.35724	4.11019	3.97901	2.27372	4.85352	5.99038	8.70136	1.44294	7.30214	4.89725	3.32313	3.67293	13.1176	5.72803	4.11019	0.918233	2.31745	2287
ENSSSA1UGT000415	6.11111	1.55556	5.77778	11.2222	4.44444	3.66667	2.66667	6.44444	6.77778	9.33333	2.22222	4.66667	3.55556	3.55556	6.77778	4.11111	4.88889	5.55556	1.66667	5	900
ENSSSA1UGT000423	2.0202	2.82828	3.23232	4.24242	5.85859	5.05051	3.0303	6.46465	6.46465	12.5253	3.43434	3.23232	3.23232	5.05051	7.47475	8.28283	7.67677	4.24242	2.82828	2.82828	495
ENSSSA1UGT000425	4.62428	3.37187	3.56455	3.9499	5.87669	5.87669	2.6975	5.87669	4.4316	8.3815	1.44509	5.78035	6.55106	5.00963	6.6474	11.079	4.4316	5.49133	1.44509	3.46821	1038
ENSSSA1UGT000426	3.66162	4.79798	2.65152	4.41919	7.07071	4.29293	2.0202	7.32323	4.54545	11.6162	1.89394	6.06061	3.66162	3.78788	6.31313	11.2374	4.67172	4.79798	1.64141	3.53535	792
ENSSSA1UGT000435	7.26257	1.39665	6.14525	4.46927	5.58659	4.18994	2.7933	6.70391	11.7318	9.49721	0.837989	5.30726	3.91061	3.91061	2.7933	9.49721	5.30726	6.42458	0.27933	1.95531	358
ENSSSA1UGT000436	4.11081	3.93208	3.30652	2.77033	8.40036	3.66399	3.48525	6.07685	8.13226	10.5451	1.42985	5.36193	4.20018	4.11081	6.16622	10.7239	5.36193	4.11081	1.25112	2.8597	1119
ENSSSA1UGT000438	4.61538	3.07692	1.53846	4.61538	4.61538	9.23077	1.53846	6.15385	4.61538	12.3077	4.61538	1.53846	10.7692	4.61538	3.07692	12.3077	0	6.15385	0	4.61538	65
ENSSSA1UGT000439	5.37815	2.68908	4.87395	4.53782	4.36975	6.72269	4.36975	6.21849	4.36975	11.4286	2.85714	4.53782	3.86555	2.18487	6.55462	6.89076	5.37815	6.89076	1.68067	4.20168	595
ENSSSA1UGT000441	4.21053	6.1244	2.77512	3.25359	5.74163	5.16746	3.73206	4.40191	4.21053	7.6555	0.382775	4.78469	3.92344	4.21053	11.866	13.0144	4.88038	4.49761	1.62679	3.54067	1045
ENSSSA1UGT000442	2.91545	6.99708	2.33236	1.74927	6.99708	3.207	7.28863	6.99708	1.74927	8.45481	0.291545	7.58017	3.79009	3.79009	7.87172	9.62099	4.37318	8.16327	2.33236	3.49854	343
ENSSSA1UGT000444	5.58598	1.97152	4.92881	7.77656	4.92881	5.47645	2.95728	3.83352	8.10515	8.65279	2.51917	6.0241	3.3954	3.28587	5.91457	8.65279	4.60022	7.77656	0.766703	2.84775	913
ENSSSA1UGT000445	3.50365	2.91971	1.75182	4.23358	10.073	5.54745	3.94161	6.42336	5.69343	11.9708	1.60584	4.52555	5.83942	3.79562	6.56934	7.29927	7.15328	5.10949	0.729927	1.31387	685
ENSSSA1UGT000447	7.07237	1.48026	3.61842	3.94737	4.27632	9.70395	4.11184	1.97368	1.97368	9.375	0.164474	1.80921	10.6908	6.90789	15.1316	8.88158	3.78289	3.94737	0.328947	0.822368	608
ENSSSA1UGT000448	6.18687	2.0202	3.91414	2.77778	5.68182	4.41919	4.67172	4.92424	6.56566	10.4798	2.52525	4.41919	5.93434	3.28283	6.69192	9.72222	5.55556	5.55556	1.64141	3.0303	792
ENSSSA1UGT000449	5.47945	2.51142	2.51142	4.10959	5.93607	4.10959	2.51142	3.19635	5.70776	7.53425	1.82648	4.56621	7.99087	4.10959	8.90411	13.0137	7.99087	4.10959	2.73973	1.14155	438
ENSSSA1UGT000451	4.08163	3.45369	2.98273	5.49451	8.00628	5.96546	1.72684	6.27943	8.94819	8.00628	1.41287	5.02355	3.76766	3.61068	5.96546	7.37834	5.33752	6.75039	2.04082	3.76766	637
ENSSSA1UGT000454	3.97351	1.98675	7.28477	9.93377	3.31126	3.97351	1.3245	7.94702	4.63576	9.27152	1.3245	5.29801	1.3245	3.97351	9.27152	9.93377	3.97351	8.60927	1.3245	1.3245	151
ENSSSA1UGT000455	5.84416	2.07792	4.54545	4.41558	5.32468	4.54545	3.11688	7.4026	6.62338	11.4286	1.55844	5.45455	3.76623	3.76623	4.67532	10.7792	4.80519	5.97403	0.779221	3.11688	770
ENSSSA1UGT000458	19.5704	0.477327	0.238663	0	6.68258	22.673	0	0.238663	0	10.0239	0.238663	0	8.59189	1.67064	11.9332	7.39857	0.477327	3.81862	5.96659	0	419
ENSSSA1UGT000462	4.93827	2.74348	5.21262	7.81893	5.62414	3.97805	3.29218	6.72154	6.44719	11.6598	2.33196	6.03567	2.46914	2.88066	4.52675	7.68176	5.21262	6.99588	0.411523	3.01783	729
ENSSSA1UGT000464	10.6195	1.76991	5.0885	2.65487	4.64602	8.18584	5.53097	1.76991	1.99115	7.74336	2.65487	4.64602	7.52212	4.42478	4.42478	11.5044	7.52212	4.20354	0.663717	2.43363	452
ENSSSA1UGT000466	10.0367	3.42717	2.32558	2.93758	3.54957	5.99755	2.44798	5.38556	3.67197	6.60955	1.59119	3.18237	6.85435	2.08078	11.1383	14.0759	7.58874	4.77356	1.22399	1.10159	817
ENSSSA1UGT000471	6.26186	2.46679	4.36433	6.26186	5.12334	6.83112	1.89753	7.77989	7.21063	9.67742	1.70778	3.22581	3.22581	4.36433	4.55408	8.72865	5.12334	7.21063	0.189753	3.79507	527
ENSSSA1UGT000472	6.71378	2.29682	2.82686	7.95053	4.59364	7.24382	3.53357	3.18021	5.30035	10.7774	1.23675	3.53357	4.947	6.00707	12.3675	7.24382	2.4735	3.88693	2.12014	1.76678	566
ENSSSA1UGT000476	5.06073	3.23887	3.23887	4.65587	3.84615	8.09717	3.64372	4.25101	6.07287	7.28745	1.417	5.06073	2.83401	4.65587	10.3239	11.336	4.8583	5.66802	1.417	3.03644	494
ENSSSA1UGT000479	4.95868	2.75482	6.33609	10.7438	3.85675	5.23416	4.13223	7.16253	7.98898	4.40771	3.0303	2.47934	6.06061	6.88705	4.40771	6.06061	5.50964	5.23416	0.826446	1.92837	363
ENSSSA1UGT000481	7.27273	12.7273	0	7.27273	3.63636	1.81818	3.63636	3.63636	7.27273	5.45455	3.63636	9.09091	5.45455	3.63636	9.09091	3.63636	1.81818	1.81818	0	9.09091	55
ENSSSA1UGT000484	4.4586	5.09554	1.27389	7.00637	4.4586	1.91083	3.18471	7.00637	7.64331	12.7389	1.91083	6.36943	3.18471	5.73248	5.09554	8.28025	4.4586	6.36943	1.91083	1.91083	157
ENSSSA1UGT000485	6.37681	1.44928	3.04348	5.21739	4.49275	4.34783	4.34783	4.63768	5.7971	13.1884	0.869565	3.47826	7.10145	2.89855	7.10145	8.26087	4.49275	8.26087	2.46377	2.17391	690
ENSSSA1UGT000488	6.86427	1.24805	9.36037	7.95632	4.36817	5.14821	2.34009	4.05616	10.7644	8.58034	3.58814	4.21217	4.21217	2.65211	5.30421	8.11232	4.52418	4.36817	0.624025	1.71607	641
ENSSSA1UGT000489	4.0695	2.46914	5.94422	6.26429	5.02972	3.65798	2.33196	7.45313	9.09922	8.36763	1.28029	7.63603	4.2524	4.2524	4.66392	8.3219	6.17284	5.07545	0.365798	3.29218	2187
ENSSSA1UGT000490	5.18519	3.20988	3.45679	5.4321	4.69136	7.40741	3.7037	5.4321	4.69136	8.88889	1.48148	3.45679	5.67901	5.92593	10.3704	8.39506	4.69136	4.69136	1.48148	1.7284	405
ENSSSA1UGT000491	8.54093	0.355872	2.4911	4.62633	4.98221	8.54093	3.91459	4.62633	3.55872	17.4377	4.27046	2.4911	3.20285	1.77936	1.77936	7.82918	8.18505	10.3203	0	1.06762	281
ENSSSA1UGT000494	5.16717	2.73556	4.25532	7.29483	3.64742	3.34347	3.03951	3.03951	8.81459	12.462	1.51976	8.20669	3.95137	4.55927	4.86322	10.0304	3.03951	4.55927	1.21581	4.25532	329
ENSSSA1UGT000495	6.41026	1.28205	4.48718	8.33333	3.84615	6.41026	5.12821	4.16667	9.29487	10.5769	3.20513	2.5641	5.12821	3.52564	5.44872	4.16667	2.88462	7.37179	1.92308	3.84615	312
ENSSSA1UGT000496	4.25963	6.28803	1.0142	3.85396	4.86815	3.0426	2.63692	4.0568	4.46247	9.53347	2.23124	2.23124	5.27383	3.0426	7.91075	19.2698	8.72211	3.65112	2.43408	1.21704	493
ENSSSA1UGT000497	6.66667	2.45614	3.33333	4.91228	3.68421	6.31579	2.10526	4.73684	4.21053	8.42105	2.45614	4.38596	7.54386	3.85965	7.19298	10.1754	5.61404	8.24561	1.05263	2.63158	570
ENSSSA1UGT000507	3.4632	6.06061	2.3088	3.4632	6.06061	4.329	2.7417	5.62771	7.21501	8.94661	1.443	5.91631	3.1746	5.91631	7.50361	12.8427	3.7518	4.329	2.0202	2.886	693
ENSSSA1UGT000508	3.92157	2.52101	5.88235	7.28291	3.64146	8.68347	1.12045	5.04202	9.80392	8.40336	3.08123	3.08123	2.2409	4.7619	8.12325	4.20168	4.7619	7.28291	2.80112	3.36134	357
ENSSSA1UGT000515	7.89916	2.01681	1.51261	2.85714	2.85714	5.37815	2.01681	3.52941	2.68908	5.54622	0.672269	2.35294	10.9244	0.672269	13.1092	19.1597	10.084	3.36134	1.68067	1.68067	595
ENSSSA1UGT000517	4.54545	1.46104	6.00649	7.14286	6.33117	6.16883	3.08442	7.30519	8.27922	6.81818	2.5974	4.38312	4.38312	2.5974	4.05844	7.46753	7.46753	6.16883	0.811688	2.92208	616
ENSSSA1UGT000518	6.37971	2.84397	2.15219	2.69024	4.6887	7.22521	1.84473	3.38201	3.22829	8.22444	1.61414	2.45965	9.3774	2.92083	10.146	13.8355	9.06995	3.99693	2.61337	1.30669	1301
ENSSSA1UGT000519	5.70571	2.7027	2.1021	4.5045	2.4024	7.95796	5.25526	3.45345	3.75375	9.90991	0.45045	3.45345	8.40841	5.55556	11.4114	8.85886	6.60661	3.75375	2.55255	1.2012	666
ENSSSA1UGT000521	5.51724	2.06897	9.65517	6.89655	3.44828	1.37931	0.689655	2.75862	6.2069	8.96552	5.51724	4.82759	2.75862	7.58621	8.27586	11.0345	4.13793	4.82759	0	3.44828	145
ENSSSA1UGT000522	6.10687	8.39695	1.52672	8.39695	3.81679	3.81679	2.29008	6.10687	5.34351	6.10687	0	4.58015	15.2672	5.34351	4.58015	7.63359	3.05344	1.52672	4.58015	1.52672	131
ENSSSA1UGT000532	6.93182	1.36364	4.20455	11.25	3.97727	2.04545	2.5	5.68182	9.88636	11.4773	2.61364	2.95455	3.06818	5.79545	7.72727	6.47727	3.52273	4.77273	0.681818	3.06818	880
ENSSSA1UGT000533	6.93878	1.63265	3.67347	4.08163	8.97959	2.04082	1.63265	5.71429	5.71429	11.8367	2.04082	4.4898	4.08163	4.4898	3.67347	10.6122	4.4898	6.93878	1.63265	5.30612	245
ENSSSA1UGT000534	8.04749	1.45119	5.5409	7.65172	2.90237	4.22164	1.58311	5.80475	11.4776	9.76253	1.18734	5.01319	3.82586	6.0686	5.01319	7.91557	3.56201	4.88127	0.659631	3.43008	758
ENSSSA1UGT000535	3.22148	1.74497	4.42953	6.57718	7.78523	3.22148	2.81879	6.57718	8.99329	7.38255	1.74497	3.08725	7.11409	1.61074	5.63758	7.91946	9.5302	5.63758	1.87919	3.08725	745
ENSSSA1UGT000540	10.1449	2.89855	3.62319	5.7971	2.17391	3.62319	0.724638	6.52174	18.1159	5.7971	4.34783	0.724638	4.34783	0.724638	7.24638	7.24638	6.52174	5.7971	0	3.62319	138
ENSSSA1UGT000542	2.92398	3.7037	0.974659	5.26316	6.23782	5.45809	2.53411	10.5263	7.9922	7.79727	3.11891	3.50877	4.09357	3.31384	7.79727	7.9922	6.43275	7.40741	1.36452	1.55945	513
ENSSSA1UGT000543	4.0856	4.66926	4.76654	5.15564	5.05837	6.1284	4.0856	3.50195	4.37743	9.8249	0.972763	4.28016	6.42023	4.0856	6.90661	9.4358	5.7393	6.32296	0.680934	3.50195	1028
ENSSSA1UGT000545	6.85185	3.51852	1.66667	3.14815	3.51852	8.14815	0.925926	3.14815	3.33333	5.37037	0.925926	1.48148	10.7407	2.22222	12.7778	13.3333	10	2.40741	4.07407	2.40741	540
ENSSSA1UGT000546	6.88259	3.64372	4.45344	4.65587	4.65587	3.84615	2.42915	4.25101	2.42915	11.7409	2.02429	2.22672	5.87045	4.8583	8.90688	10.5263	3.84615	9.51417	1.61943	1.61943	494
ENSSSA1UGT000547	4.88778	2.24439	5.48628	6.18454	3.54115	5.13716	1.84539	4.2394	6.33416	9.52618	2.04489	5.28678	7.33167	4.13965	7.18204	10.8728	6.53367	5.13716	0.798005	1.24688	2005
ENSSSA1UGT000550	5.30612	3.53741	1.63265	3.26531	5.44218	4.62585	4.21769	5.30612	7.07483	8.02721	0.544218	5.03401	3.80952	6.2585	8.84354	10.8844	8.16327	4.62585	1.22449	2.17687	735
ENSSSA1UGT000551	5.23256	1.97674	4.18605	4.88372	8.13953	6.86047	2.32558	5.93023	6.16279	9.06977	1.86047	6.27907	2.2093	3.48837	4.76744	9.18605	5.11628	6.16279	1.51163	4.65116	860
ENSSSA1UGT000559	3.22581	2.72953	5.95533	8.68486	5.95533	4.21836	1.73697	6.45161	9.42928	10.4218	1.24069	4.96278	4.21836	3.47395	2.23325	7.94045	3.72208	8.18859	0.992556	4.21836	403
ENSSSA1UGT000564	5.03401	3.12925	6.66667	6.39456	5.98639	5.17007	2.31293	5.30612	6.66667	10.6122	1.36054	4.62585	5.57823	2.31293	4.89796	8.84354	4.35374	6.80272	0.816327	3.12925	735
ENSSSA1UGT000565	5.14286	2.57143	5.42857	3.42857	5.42857	4.85714	1.71429	4	6.57143	9.71429	3.14286	6.28571	5.14286	5.14286	6.28571	6	6.28571	7.14286	1.71429	4	350
ENSSSA1UGT000568	4.8913	1.63043	1.90217	3.26087	7.33696	4.07609	1.08696	4.61957	6.79348	7.88043	1.90217	2.98913	5.43478	2.17391	9.23913	14.6739	10.5978	3.80435	2.44565	3.26087	368
ENSSSA1UGT000569	6.44567	3.68324	2.11786	5.61694	5.3407	5.98527	3.13076	4.60405	6.07735	4.14365	1.10497	4.60405	2.94659	3.77532	13.4438	12.7072	6.07735	4.41989	1.10497	2.67035	1086
ENSSSA1UGT000570	4.42105	2	4.21053	3.26316	6.94737	3.78947	2.84211	7.57895	4.42105	16.2105	2.21053	4.84211	2.94737	2.52632	3.78947	9.68421	5.89474	7.05263	1.26316	4.10526	950
ENSSSA1UGT000572	6.93717	2.09424	3.66492	4.51571	6.28272	6.08639	2.0288	6.21728	4.97382	11.2565	2.22513	3.79581	4.97382	3.07592	5.10471	7.65707	6.41361	7.98429	1.11257	3.59948	1528
ENSSSA1UGT000573	7.48031	2.49344	4.06824	4.72441	6.16798	4.98688	1.83727	6.82415	7.34908	9.58005	1.83727	5.77428	4.72441	2.75591	5.38058	8.66142	3.67454	4.85564	1.70604	5.11811	762
ENSSSA1UGT000574	6.11247	3.54523	5.13447	6.96822	4.52323	6.72372	3.42298	5.01222	4.64548	10.2689	1.22249	5.50122	4.15648	2.07824	9.29095	7.33496	5.50122	5.25672	0.977995	2.32274	818
ENSSSA1UGT000575	4.86486	3.24324	5.58559	6.12613	3.78378	4.86486	2.88288	5.94595	9.00901	11.7117	1.8018	4.14414	4.5045	4.14414	2.52252	8.10811	3.24324	8.64865	0.720721	4.14414	555
ENSSSA1UGT000576	3.50877	3.50877	1.75439	6.14035	2.63158	2.63158	4.38596	7.89474	12.2807	11.4035	0.877193	9.64912	5.26316	3.50877	5.26316	6.14035	5.26316	3.50877	0.877193	3.50877	114
ENSSSA1UGT000578	5.02092	3.55649	3.76569	5.64854	3.13808	9.62343	2.09205	3.9749	7.32218	6.06695	1.25523	5.02092	5.43933	4.39331	8.57741	11.0879	3.76569	4.39331	2.51046	3.34728	478
ENSSSA1UGT000586	10.4	0	3.2	5.6	0.8	6.4	2.4	6.4	15.2	4.8	2.4	3.2	2.4	2.4	6.4	11.2	6.4	6.4	0	4	125
ENSSSA1UGT000588	4.52489	3.01659	2.41327	7.39065	5.12821	4.0724	3.31825	4.97738	7.39065	12.6697	1.80995	4.0724	4.82655	3.77074	5.27903	8.89894	6.6365	4.97738	1.20664	3.61991	663
ENSSSA1UGT000592	3.42466	2.22603	4.28082	5.65068	5.99315	4.62329	3.25342	8.04795	6.84932	9.76027	2.39726	4.28082	4.79452	4.10959	7.53425	8.21918	4.96575	5.13699	2.05479	2.39726	584
ENSSSA1UGT000595	2.17391	5.72082	3.54691	5.83524	6.29291	4.23341	6.97941	4.11899	8.46682	6.17849	0.572082	2.40275	4.69108	3.54691	6.75057	18.4211	7.55149	1.94508	0	0.572082	874
ENSSSA1UGT000596	6.54628	2.25734	3.16027	4.51467	3.16027	5.86907	2.93454	6.32054	4.74041	6.77201	1.80587	3.83747	11.0609	3.61174	7.67494	10.6095	5.86907	5.64334	2.0316	1.58014	443
ENSSSA1UGT000597	5.92885	3.35968	0.988142	2.7668	2.37154	4.34783	1.3834	5.33597	4.54545	5.73123	1.58103	2.96443	6.917	2.96443	12.4506	19.3676	10.8696	1.77866	2.7668	1.58103	506
ENSSSA1UGT000598	5.14641	2.5732	4.43656	5.94499	5.50133	3.54925	2.5732	6.5661	7.27595	11.3576	2.48447	5.14641	4.34783	5.23514	4.25909	7.18722	5.50133	7.09849	0.79858	3.01686	1127
ENSSSA1UGT000601	3.91986	2.87456	2.00348	2.35192	5.83624	3.223	3.91986	5.66202	5.31359	11.5854	2.35192	4.96516	4.96516	3.48432	7.14286	12.6307	8.62369	4.52962	2.1777	2.43902	1148
ENSSSA1UGT000602	5.59441	4.07925	3.7296	2.91375	7.92541	4.07925	1.74825	9.20746	5.94406	11.3054	1.98135	3.61305	4.07925	1.8648	5.36131	9.44056	3.84615	6.29371	1.8648	5.12821	858
ENSSSA1UGT000603	7.25806	3.62903	1.6129	3.22581	2.41935	4.6371	1.81452	5.44355	6.45161	10.0806	1.41129	4.23387	5.04032	2.82258	11.2903	10.4839	8.66935	5.24194	2.41935	1.81452	496
ENSSSA1UGT000611	5.10638	3.93617	3.19149	5.10638	7.34043	5.74468	4.46809	5.42553	5.6383	10.6383	1.38298	3.29787	3.29787	3.40426	7.23404	9.89362	5.42553	4.68085	1.2766	3.51064	940
ENSSSA1UGT000613	4.04624	2.31214	9.24855	3.46821	3.46821	4.62428	3.46821	5.20231	8.67052	7.51445	1.15607	7.51445	2.89017	4.62428	8.67052	6.93642	7.51445	5.78035	0	2.89017	173
ENSSSA1UGT000616	5.60272	2.03735	4.58404	6.28183	4.58404	6.28183	2.88625	6.11205	6.79117	9.67742	1.69779	3.90492	2.71647	5.43294	4.9236	8.31919	5.94228	8.31919	1.01868	2.88625	589
ENSSSA1UGT000617	6.2417	0.796813	4.78088	6.5073	3.85126	4.64807	2.92165	5.31208	6.5073	10.093	1.85923	5.84329	8.49934	7.03851	2.65604	11.0226	3.45286	3.98406	0.796813	3.18725	753
ENSSSA1UGT000618	3.58127	3.71901	2.75482	3.99449	6.06061	7.85124	3.44353	4.6832	5.23416	9.64187	0.550964	3.99449	5.09642	5.3719	12.5344	8.26446	4.13223	5.23416	0.826446	3.0303	726
ENSSSA1UGT000621	7.431	2.12314	3.60934	5.73248	3.82166	6.36943	2.76008	5.09554	8.06794	8.28025	2.9724	5.09554	2.76008	2.54777	7.21868	9.12951	6.58174	4.88323	1.91083	3.60934	471
ENSSSA1UGT000622	6.70391	0.931099	5.95903	5.58659	2.97952	7.44879	2.97952	5.58659	3.91061	10.4283	2.23464	5.40037	6.33147	1.8622	6.89013	6.89013	4.28305	6.89013	2.60708	4.09683	537
ENSSSA1UGT000623	4.60526	2.41228	2.85088	4.38596	6.35965	3.50877	1.97368	4.82456	5.70175	8.11404	0.877193	3.50877	4.82456	4.38596	7.67544	15.5702	7.01754	5.92105	2.19298	3.28947	456
ENSSSA1UGT000625	7.6087	0.724638	6.88406	5.07246	5.07246	13.4058	1.08696	3.98551	8.33333	2.89855	1.81159	4.71014	4.71014	5.07246	4.34783	5.43478	5.07246	5.7971	0	7.97101	276
ENSSSA1UGT000626	4.10448	2.61194	2.61194	3.48259	6.21891	2.61194	2.98507	6.59204	9.57711	14.9254	2.61194	3.73134	2.98507	2.8607	5.47264	11.8159	5.22388	5.84577	0.995025	2.73632	804
ENSSSA1UGT000627	4.14815	1.03704	6.96296	4.88889	5.18519	5.77778	1.92593	7.11111	5.62963	10.0741	3.25926	5.03704	4.59259	2.37037	5.62963	6.96296	6.51852	5.77778	2.66667	4.44444	675
ENSSSA1UGT000628	5.13393	3.01339	3.125	3.79464	5.02232	7.58929	5.13393	4.01786	3.90625	10.4911	1.11607	2.56696	7.92411	4.24107	12.8348	6.69643	3.57143	5.91518	1.45089	2.45536	896
ENSSSA1UGT000629	7.54537	2.5788	3.72493	6.39924	4.48902	3.4384	2.76982	7.25883	6.87679	12.6074	2.67431	4.96657	2.76982	4.39351	4.58453	9.36008	4.29799	5.73066	0.668577	2.86533	1047
ENSSSA1UGT000631	3.14961	3.93701	4.19948	3.93701	7.08661	6.03675	3.93701	5.77428	4.46194	6.56168	0.787402	6.03675	4.72441	4.19948	12.0735	9.71129	4.72441	4.19948	0.524934	3.93701	381
ENSSSA1UGT000636	2.73556	5.6231	3.64742	5.92705	5.31915	4.86322	8.81459	3.34347	8.66261	6.83891	0.455927	4.10334	3.95137	1.51976	5.77508	15.6535	8.51064	3.64742	0	0.607903	658
ENSSSA1UGT000640	3.31325	1.80723	4.21687	3.61446	5.72289	8.73494	2.40964	6.0241	5.72289	7.83133	1.80723	2.71084	4.81928	5.12048	7.22892	10.8434	7.22892	7.22892	1.50602	2.10843	332
ENSSSA1UGT000641	4.38596	1.16959	5.84795	6.72515	3.80117	7.89474	2.92398	5.84795	8.47953	5.84795	2.33918	4.38596	2.63158	6.43275	6.72515	5.26316	3.50877	9.94152	1.75439	4.09357	342
ENSSSA1UGT000642	5.10949	1.94647	5.10949	5.10949	6.81265	3.89294	2.6764	7.05596	5.10949	11.9221	2.18978	2.91971	4.86618	3.16302	4.37956	9.73236	5.10949	5.83942	2.18978	4.86618	411
ENSSSA1UGT000644	7.17402	2.42365	1.9874	2.32671	4.70189	4.79884	2.61755	4.508	4.21716	6.98013	1.30877	3.05381	10.1309	2.03587	12.9908	11.6335	9.11294	4.02327	2.27824	1.69656	2063
ENSSSA1UGT000645	4.72441	2.58718	3.37458	3.82452	6.29921	7.08661	4.04949	4.94938	3.14961	6.97413	0.787402	5.17435	4.8369	3.59955	11.2486	11.3611	5.96175	4.49944	2.3622	3.14961	889
ENSSSA1UGT000646	6.77966	11.8644	0	6.77966	3.38983	1.69492	3.38983	3.38983	8.47458	5.08475	3.38983	8.47458	5.08475	3.38983	10.1695	5.08475	1.69492	1.69492	0	10.1695	59
ENSSSA1UGT000647	4.92308	2.76923	5.23077	6.46154	8.30769	4	2.15385	4	6.46154	9.84615	3.38462	5.84615	4.92308	3.38462	4	7.38462	4.61538	5.84615	1.84615	4.61538	325
ENSSSA1UGT000648	4.99716	4.59966	8.0636	4.59966	3.40716	7.21181	3.12323	5.84895	5.33788	8.29074	1.87394	5.50823	4.71323	2.10108	5.73538	7.95003	4.99716	6.47359	2.38501	2.78251	1761
ENSSSA1UGT000650	5.45455	4.54545	5.45455	8.18182	6.36364	4.09091	1.81818	5.45455	9.54545	8.18182	2.27273	5	6.36364	2.27273	5.45455	8.63636	5	3.63636	0.454545	1.81818	220
ENSSSA1UGT000653	5.57351	2.98869	2.50404	2.98869	7.18901	6.30048	2.82714	9.36995	4.84653	10.9855	2.82714	3.39257	5.08885	3.15024	3.47334	8.07754	5.33118	6.86591	1.61551	4.6042	1238
ENSSSA1UGT000655	10.4	0	3.2	5.6	0.8	6.4	2.4	6.4	15.2	4.8	2.4	3.2	2.4	2.4	6.4	11.2	6.4	6.4	0	4	125
ENSSSA1UGT000658	6.19469	3.53982	7.07965	2.65487	5.30973	5.30973	3.53982	3.53982	9.73451	6.19469	1.76991	4.42478	9.73451	7.07965	7.07965	5.30973	3.53982	3.53982	1.76991	2.65487	113
ENSSSA1UGT000660	5.37815	2.18487	3.52941	6.05042	4.36975	6.55462	1.68067	4.03361	6.21849	8.7395	1.0084	5.04202	5.71429	2.85714	10.4202	10.084	5.37815	7.89916	1.0084	1.84874	595
ENSSSA1UGT000661	4.41176	0	5.39216	6.37255	5.88235	4.90196	3.92157	5.39216	9.80392	9.80392	2.94118	5.88235	4.41176	6.37255	2.94118	8.82353	3.92157	5.39216	0	3.43137	204
ENSSSA1UGT000665	5.04732	2.2082	4.10095	7.88644	3.78549	3.78549	3.78549	3.47003	9.46372	12.9338	1.57729	6.30915	3.47003	4.4164	5.36278	10.0946	3.78549	3.78549	0.946372	3.78549	317
ENSSSA1UGT000666	4.86436	3.83536	2.33863	3.83536	3.55472	7.48363	0.748363	5.23854	7.0159	7.95136	3.087	3.92891	4.30309	2.61927	11.2254	10.29	7.48363	4.9579	2.61927	2.61927	1069
ENSSSA1UGT000667	6.81818	1.13636	3.40909	7.95455	3.40909	9.09091	4.54545	4.16667	2.65152	8.33333	1.13636	4.16667	7.19697	4.54545	10.6061	7.19697	4.92424	5.30303	0.757576	2.65152	264
ENSSSA1UGT000668	3.54523	3.17848	3.78973	4.88998	7.57946	2.93399	3.91198	7.45721	6.47922	11.4914	2.44499	5.99022	3.54523	3.05623	5.25672	8.31296	5.62347	5.13447	1.71149	3.66748	818
ENSSSA1UGT000669	7.01439	2.8777	3.95683	4.4964	4.13669	7.55396	1.79856	7.01439	5.57554	12.4101	1.79856	6.29496	4.67626	1.97842	7.01439	9.53237	2.51799	5.93525	1.25899	2.15827	556
ENSSSA1UGT000670	3.70943	4.32767	3.09119	4.63679	5.25502	3.86399	2.47295	7.57342	8.50077	9.27357	1.23648	6.33694	3.86399	3.24575	7.10974	8.34621	6.95518	5.56414	1.70015	2.93663	647
ENSSSA1UGT000672	3.0871	3.85888	2.53583	2.97685	6.50496	3.0871	3.85888	8.15877	8.04851	11.0254	2.20507	4.85116	3.41786	3.19735	7.6075	8.59978	4.85116	4.96141	1.54355	5.62293	907
ENSSSA1UGT000673	4.91803	1.43443	5.32787	5.32787	6.65984	2.45902	3.17623	5.94262	7.17213	8.81148	2.2541	8.29918	3.58607	3.38115	3.9959	10.8607	5.43033	5.02049	1.12705	4.81557	976
ENSSSA1UGT000676	4.66786	3.05206	1.6158	3.41113	4.3088	5.20646	3.05206	7.0018	4.3088	11.6697	3.2316	3.7702	4.8474	3.7702	8.25853	7.0018	9.87433	4.8474	3.05206	3.05206	557
ENSSSA1UGT000681	6.31068	1.57767	4.36893	4.49029	3.2767	5.58252	2.91262	5.82524	4.00485	11.2864	3.15534	4.49029	7.76699	4.85437	5.70388	9.70874	5.82524	5.46117	1.09223	2.30583	824
ENSSSA1UGT000685	8.94309	0	1.62602	1.62602	7.31707	4.87805	0.813008	8.13008	4.87805	12.1951	0.813008	4.06504	4.87805	6.50407	4.06504	10.5691	3.25203	8.13008	4.87805	2.43902	123
ENSSSA1UGT000686	5.47368	2.94737	2.73684	6.52632	5.89474	3.78947	2.73684	6.10526	7.15789	10.1053	1.89474	6.73684	5.05263	4	5.47368	7.15789	5.47368	5.26316	1.05263	4.42105	475
ENSSSA1UGT000687	6.75273	0.595829	2.18471	2.28401	4.27011	20.7547	1.19166	4.1708	1.68818	5.56107	2.28401	7.14995	10.1291	8.2423	3.37637	4.76663	4.86594	5.06455	0.893744	3.77358	1007
ENSSSA1UGT000688	4.51128	2.81955	6.39098	5.82707	4.13534	5.07519	3.38346	6.76692	5.26316	9.58647	2.06767	4.69925	2.81955	3.7594	7.33083	8.27068	5.45113	6.39098	2.63158	2.81955	532
ENSSSA1UGT000689	2.25989	6.49718	2.82486	2.25989	8.47458	5.64972	2.54237	6.49718	5.08475	8.19209	0.847458	4.23729	1.41243	5.36723	11.0169	12.7119	4.23729	4.23729	1.41243	4.23729	354
ENSSSA1UGT000690	6.28675	2.21619	4.74898	6.15106	4.74898	4.43238	2.80416	5.92492	5.47264	13.2067	2.39711	5.33695	4.52284	4.2967	4.9299	7.59837	4.79421	5.74401	1.08548	3.30167	2211
ENSSSA1UGT000692	3.90071	3.64742	3.90071	6.231	4.66059	3.59676	3.69807	6.33232	8.05471	8.81459	2.22898	5.72442	4.00203	4.25532	4.20466	9.27052	7.0922	6.99088	0.35461	3.03951	1974
ENSSSA1UGT000694	9.56938	0.956938	7.41627	9.33014	4.78469	3.34928	1.67464	6.9378	9.80861	10.5263	2.39234	2.87081	4.54545	4.30622	6.2201	4.78469	3.82775	3.82775	0.717703	2.15311	418
ENSSSA1UGT000696	4.04624	4.04624	1.15607	3.46821	5.20231	3.46821	2.89017	9.24855	6.93642	13.2948	4.62428	4.04624	3.46821	3.46821	6.93642	8.67052	8.09249	4.62428	0.578035	1.7341	173
ENSSSA1UGT000698	4.23529	2.35294	4.23529	8.23529	2.82353	7.05882	2.11765	7.52941	7.29412	12	1.64706	3.52941	2.58824	4	5.17647	8.47059	4.70588	8.47059	1.64706	1.88235	425
ENSSSA1UGT000699	2.64766	1.62933	5.70265	5.29532	7.73931	2.24033	4.27699	7.53564	6.92464	13.8493	1.222	4.88798	3.25866	4.07332	5.70265	6.92464	5.49898	5.90631	0.610998	4.07332	491
ENSSSA1UGT000701	3.75587	1.52582	4.57746	5.39906	5.39906	3.52113	2.58216	5.28169	6.80751	9.74178	2.11268	6.33803	5.98592	3.40376	6.10329	12.7934	6.10329	6.22066	0.704225	1.64319	852
ENSSSA1UGT000704	5.625	3.97727	4.60227	4.65909	4.31818	6.30682	4.88636	3.69318	3.29545	8.23864	0.568182	3.69318	6.02273	3.69318	12.2727	8.46591	4.82955	5.11364	2.15909	3.57955	1760
ENSSSA1UGT000707	4.13724	2.11907	1.00908	2.4218	5.34813	2.21998	2.5227	7.06357	5.85267	12.6135	2.62361	5.44904	5.85267	5.44904	6.1554	11.4026	7.97175	7.06357	0.807265	1.91726	991
ENSSSA1UGT000710	5	4.20635	4.12698	7.14286	6.11111	4.12698	4.20635	5.79365	7.61905	7.46032	1.66667	6.03175	4.04762	4.44444	5.87302	8.88889	5.31746	4.68254	0.873016	2.38095	1260
ENSSSA1UGT000711	2.27273	5.06993	4.37063	5.76923	5.76923	4.54545	6.99301	4.54545	8.39161	6.99301	0.524476	3.4965	5.06993	2.97203	5.76923	16.6084	7.16783	2.97203	0	0.699301	572
ENSSSA1UGT000712	4.2623	2.13115	3.60656	4.7541	5.57377	4.91803	2.13115	6.88525	5.7377	10.8197	2.78689	5.40984	4.7541	4.2623	4.42623	5.7377	6.88525	7.54098	2.29508	5.08197	610
ENSSSA1UGT000714	6.79214	1.63666	4.90998	5.64648	5.15548	3.84615	2.61866	5.64648	6.38298	8.83797	1.96399	5.31915	6.46481	4.66448	5.72831	7.28314	5.72831	7.20131	1.39116	2.78232	1222
ENSSSA1UGT000715	3.30579	2.47934	4.95868	6.40496	3.09917	4.54545	2.27273	5.78512	7.2314	9.91736	2.06612	11.7769	5.16529	2.89256	4.33884	11.7769	4.54545	4.33884	0.826446	2.27273	484
ENSSSA1UGT000716	3.0888	2.4453	1.6731	2.9601	5.79151	2.8314	2.7027	7.07851	11.4543	11.7117	3.0888	4.8906	3.2175	4.1184	9.00901	8.36551	6.43501	5.40541	0.900901	2.8314	777
ENSSSA1UGT000718	7.41222	2.73082	4.6814	5.59168	5.07152	5.98179	3.51105	5.72172	4.03121	9.62289	1.69051	6.76203	4.16125	2.3407	5.85176	6.11183	5.72172	6.63199	2.08062	4.29129	769
ENSSSA1UGT000720	3.7123	5.33643	1.62413	3.24826	8.58469	2.78422	3.48028	7.88863	6.72854	6.72854	0.464037	5.80046	1.85615	5.10441	8.58469	14.1531	5.80046	2.5522	0.696056	4.87239	431
ENSSSA1UGT000721	5.18868	3.06604	2.35849	5.66038	4.24528	2.59434	1.17925	4.00943	8.49057	11.7925	2.83019	3.30189	5.66038	2.83019	7.54717	14.6226	8.25472	3.06604	1.88679	1.41509	424
ENSSSA1UGT000725	2.57009	1.40187	1.63551	1.16822	4.43925	1.40187	3.50467	7.00935	10.514	12.6168	4.90654	6.07477	5.84112	6.30841	6.7757	9.34579	4.90654	4.43925	1.63551	3.50467	428
ENSSSA1UGT000731	5.19481	2.1645	6.49351	8.22511	4.329	1.7316	1.7316	6.92641	8.22511	10.3896	2.1645	7.79221	3.0303	3.8961	5.62771	9.09091	3.8961	4.329	0.865801	3.8961	231
ENSSSA1UGT000732	6.03622	2.41449	6.43863	6.03622	4.82897	5.23139	2.61569	4.62777	9.65795	8.4507	2.41449	5.6338	5.23139	1.81087	3.01811	7.84708	6.84105	7.84708	0.804829	2.21328	497
ENSSSA1UGT000735	5.98053	1.39082	6.39777	9.04033	2.78164	3.8943	3.75522	3.19889	6.9541	10.8484	2.08623	3.75522	2.92072	5.70236	6.11961	12.1001	4.17246	5.98053	1.11266	1.80807	719
ENSSSA1UGT000737	3.19149	1.41844	4.43262	5.49645	5.31915	6.02837	3.7234	7.0922	7.44681	10.9929	1.95035	5.49645	6.73759	2.83688	6.02837	5.14184	5.49645	5.14184	1.59574	4.43262	564
ENSSSA1UGT000738	8.55856	3.15315	3.003	4.05405	6.90691	5.40541	3.45345	4.5045	4.35435	9.45946	1.05105	4.05405	4.2042	3.9039	8.85886	9.60961	6.15616	4.2042	1.5015	3.6036	666
ENSSSA1UGT000739	0.626566	6.6416	1.8797	4.51128	7.14286	4.7619	9.77444	4.51128	10.401	6.6416	0.250627	2.38095	4.01003	2.75689	5.76441	18.0451	7.01754	1.62907	0.250627	1.00251	798
ENSSSA1UGT000741	4.90463	1.90736	4.35967	5.72207	3.54223	2.7248	1.63488	8.99183	4.35967	8.71935	2.7248	7.35695	5.17711	5.17711	6.53951	10.3542	4.63215	7.62943	0.817439	2.7248	367
ENSSSA1UGT000744	5.80065	2.53268	5.31046	4.98366	5.47386	2.53268	2.45098	5.31046	8.08824	10.866	1.55229	5.63725	5.39216	4.65686	4.24837	9.80392	4.24837	6.69935	0.898693	3.51307	1224
ENSSSA1UGT000746	7.42188	0.390625	5.07812	16.4062	2.34375	4.6875	1.17188	4.6875	8.20312	8.59375	3.125	2.73438	4.29688	12.5	5.85938	4.29688	2.73438	3.125	0.78125	1.5625	256
ENSSSA1UGT000748	3.5533	3.45178	2.13198	3.75635	6.90355	5.88832	4.46701	6.49746	6.09137	8.0203	1.92893	5.27919	4.06091	3.85787	8.83249	12.1827	3.75635	4.16244	1.92893	3.24873	985
ENSSSA1UGT000749	4.28571	2.12245	5.95918	6.04082	4.69388	3.38776	2.32653	7.38776	8.69388	8.53061	1.5102	7.79592	4.65306	4.61224	4.2449	8.4898	6.08163	5.34694	0.408163	3.42857	2450
ENSSSA1UGT000754	4.2394	2.74314	5.98504	6.23441	4.98753	3.99002	1.74564	6.73317	8.4788	13.217	1.24688	4.2394	3.49127	2.49377	6.23441	8.22943	4.73815	5.98504	2.24439	2.74314	401
ENSSSA1UGT000758	8.49515	0.728155	3.8835	8.00971	2.42718	3.64078	1.94175	4.61165	7.03883	8.98058	2.6699	7.03883	3.8835	6.31068	4.85437	9.46602	9.70874	4.12621	0.970874	1.21359	412
ENSSSA1UGT000759	4.329	4.7619	6.70996	3.24675	5.19481	7.14286	7.14286	3.24675	3.24675	10.8225	0.21645	3.67965	6.27706	4.97835	10.6061	6.27706	2.1645	4.7619	2.5974	2.5974	462
ENSSSA1UGT000761	3.98551	2.35507	2.17391	3.62319	7.97101	4.52899	2.71739	7.78986	5.25362	12.3188	2.53623	4.16667	6.52174	2.89855	3.98551	9.60145	5.25362	7.97101	1.63043	2.71739	552
ENSSSA1UGT000762	4.02194	3.47349	1.27971	3.10786	5.85009	4.7532	2.19378	7.1298	5.11883	10.7861	2.3766	2.92505	4.93601	3.65631	10.2377	9.5064	9.32358	4.20475	2.55941	2.55941	547
ENSSSA1UGT000763	5.88663	2.10756	4.36047	7.70349	3.85174	3.92442	3.05233	4.79651	5.88663	11.2645	1.52616	4.36047	5.30523	3.85174	5.81395	8.43023	5.81395	6.90407	1.52616	3.63372	1376
ENSSSA1UGT000764	5.19481	2.1645	6.49351	8.22511	4.329	1.7316	1.7316	6.92641	8.22511	10.3896	2.1645	7.79221	3.0303	3.8961	5.62771	9.09091	3.8961	4.329	0.865801	3.8961	231
ENSSSA1UGT000765	3.56295	1.66271	4.038	5.46318	5.93824	4.038	3.56295	4.98812	6.65083	11.4014	3.08789	6.17577	6.65083	3.08789	5.46318	8.7886	3.56295	6.17577	1.66271	4.038	421
ENSSSA1UGT000766	2.98137	3.85093	2.1118	3.97516	9.06832	3.97516	2.48447	7.20497	7.57764	9.06832	1.49068	4.96894	4.7205	4.2236	8.07453	9.19255	5.96273	4.2236	1.36646	3.47826	805
ENSSSA1UGT000768	6.55738	1.47541	5.90164	5.2459	3.77049	7.86885	3.60656	5.7377	4.91803	8.52459	1.96721	5.7377	5.40984	3.27869	4.42623	8.85246	4.59016	6.39344	2.62295	3.11475	610
ENSSSA1UGT000769	4.15301	4.15301	1.42077	3.93443	5.68306	5.90164	3.49727	6.3388	6.55738	7.21311	0.874317	5.13661	5.68306	6.22951	10.1639	11.8033	3.82514	3.82514	1.0929	2.51366	915
ENSSSA1UGT000770	6.54362	1.84564	5.20134	4.69799	4.86577	5.36913	2.51678	7.04698	3.69128	11.0738	1.00671	4.86577	8.05369	3.18792	5.53691	6.54362	5.36913	8.38926	1.84564	2.34899	596
ENSSSA1UGT000772	4.84669	3.75865	3.46192	5.24233	6.82493	4.64886	2.96736	6.52819	5.34125	10.1879	1.97824	4.84669	5.73689	4.1543	4.45104	7.61622	5.34125	7.02275	0.890208	4.1543	1011
ENSSSA1UGT000775	5.39062	2.03125	5.625	8.04688	4.29688	5.15625	2.1875	5.54688	10.4688	9.53125	2.03125	6.17188	3.04688	2.57812	4.76562	7.10938	6.09375	5.3125	1.40625	3.20312	1280
ENSSSA1UGT000776	3.74016	5.90551	4.13386	8.85827	4.72441	2.3622	3.74016	4.52756	8.66142	8.07087	1.77165	6.49606	5.51181	5.11811	4.92126	10.0394	5.31496	4.33071	0.393701	1.37795	508
ENSSSA1UGT000778	5.13393	1.78571	5.02232	5.24554	4.6875	4.46429	2.23214	5.91518	7.36607	11.1607	2.56696	4.91071	5.24554	3.125	5.35714	8.92857	5.58036	6.47321	1.89732	2.90179	896
ENSSSA1UGT000779	6.22155	2.88316	3.0349	6.52504	5.00759	6.22155	4.85584	4.24886	5.46282	6.98027	0.455235	5.00759	4.09712	6.0698	11.0774	8.64947	3.49014	6.37329	1.51745	1.82094	659
ENSSSA1UGT000781	5.47368	2.94737	2.73684	6.52632	5.89474	3.78947	2.73684	6.10526	7.15789	10.1053	1.89474	6.73684	5.05263	4	5.47368	7.15789	5.47368	5.26316	1.05263	4.42105	475
ENSSSA1UGT000784	4.07855	2.41692	2.26586	4.07855	9.2145	3.32326	2.87009	9.06344	6.94864	9.96979	1.20846	3.17221	4.53172	4.38066	6.64653	10.8761	5.89124	5.89124	0.755287	2.41692	662
ENSSSA1UGT000785	4.31034	1.43678	6.89655	8.33333	3.73563	2.72989	1.72414	5.45977	8.04598	7.9023	2.15517	6.89655	7.47126	5.17241	4.88506	11.9253	4.5977	4.02299	0.287356	2.01149	696
ENSSSA1UGT000786	3.0837	4.84581	7.48899	1.76211	6.1674	4.40529	3.52423	6.60793	7.48899	8.81057	2.64317	5.72687	3.52423	4.40529	5.28634	9.2511	4.84581	4.84581	1.32159	3.96476	227
ENSSSA1UGT000788	6.83871	2.45161	4	4.3871	3.6129	5.67742	2.45161	7.87097	5.93548	10.7097	1.80645	5.29032	6.70968	3.48387	5.67742	6.19355	7.6129	5.67742	0.516129	3.09677	775
ENSSSA1UGT000791	5.66038	2.74443	4.80274	7.54717	5.8319	3.25901	2.22985	4.80274	8.57633	11.3208	2.40137	3.08748	4.80274	4.63122	7.03259	6.86106	5.31732	4.97427	1.20069	2.91595	583
ENSSSA1UGT000793	3.01291	3.01291	2.29555	3.29986	8.17791	3.29986	2.5825	7.89096	7.60402	13.4864	2.86944	2.29555	3.15638	5.45194	5.02152	8.60832	6.59971	5.16499	1.86514	4.30416	697
ENSSSA1UGT000794	7.22101	2.407	5.47046	4.59519	3.93873	7.87746	2.62582	6.56455	8.3151	9.62801	3.28228	4.15755	4.37637	2.62582	3.50109	6.34573	6.56455	7.43982	0.218818	2.84464	457
ENSSSA1UGT000796	6.93069	5.94059	2.9703	4.9505	6.43564	2.47525	4.9505	6.43564	5.94059	7.42574	1.9802	3.46535	1.48515	2.9703	8.91089	11.8812	3.46535	5.44554	2.9703	2.9703	202
ENSSSA1UGT000798	2.88462	3.26923	3.84615	6.34615	5.19231	4.42308	3.07692	7.69231	10.3846	10.1923	2.30769	4.23077	3.46154	4.80769	2.88462	8.26923	6.15385	6.53846	1.15385	2.88462	520
ENSSSA1UGT000800	5.25127	1.86335	4.68662	5.92885	4.74308	3.44438	2.87973	6.49351	4.63015	15.0762	2.25861	5.08187	4.0655	4.29136	4.74308	8.46979	5.59006	6.71937	0.846979	2.93619	1771
ENSSSA1UGT000801	9.78261	0.815217	3.53261	2.44565	1.3587	8.69565	5.16304	1.3587	1.90217	13.0435	0.543478	1.3587	14.6739	6.52174	9.78261	8.42391	4.8913	4.07609	0.271739	1.3587	368
ENSSSA1UGT000803	9.48276	0.862069	4.31034	4.31034	10.3448	1.72414	2.58621	5.17241	3.44828	11.2069	1.72414	5.17241	2.58621	7.75862	6.03448	10.3448	5.17241	4.31034	0.862069	2.58621	116
ENSSSA1UGT000806	5.64516	4.23387	2.52016	4.13306	8.16532	5.04032	2.41935	7.45968	5.34274	12.0968	2.01613	4.53629	2.92339	3.02419	4.43548	8.56855	5.04032	8.26613	1.6129	2.52016	992
ENSSSA1UGT000808	1.76991	4.42478	8.84956	7.9646	2.65487	3.53982	1.76991	2.65487	15.0442	6.19469	1.76991	7.07965	7.07965	3.53982	2.65487	10.6195	3.53982	7.07965	0.884956	0.884956	113
ENSSSA1UGT000811	5.55556	2.96296	4.81481	3.7037	5.18519	4.44444	5.18519	5.55556	3.7037	9.62963	1.85185	4.81481	4.81481	3.33333	4.44444	10	3.7037	6.66667	3.33333	6.2963	270
ENSSSA1UGT000813	4.33566	4.05594	1.67832	3.35664	5.73427	3.63636	3.21678	6.57343	4.05594	10.9091	2.0979	2.65734	5.03497	3.07692	8.39161	12.8671	6.85315	5.31469	2.37762	3.77622	715
ENSSSA1UGT000814	4.91453	1.7094	5.76923	4.48718	3.4188	5.12821	2.5641	9.18803	8.33333	12.8205	0.854701	4.05983	4.70085	2.77778	7.69231	7.05128	3.4188	5.34188	1.92308	3.84615	468
ENSSSA1UGT000815	3.57143	1.42857	1.60714	3.92857	3.03571	5.53571	2.14286	5	11.6071	11.9643	3.57143	6.60714	1.78571	6.25	7.85714	6.78571	8.03571	5.53571	1.78571	1.96429	560
ENSSSA1UGT000816	6.13497	1.53374	2.76074	3.98773	6.28834	6.28834	3.52761	6.74847	3.68098	9.66258	1.38037	4.44785	5.3681	3.98773	9.04908	10.7362	4.90798	4.7546	1.68712	3.06748	652
ENSSSA1UGT000817	3.30033	3.30033	3.9604	7.59076	5.61056	4.9505	0.990099	6.27063	5.61056	11.2211	1.65017	7.59076	4.9505	1.9802	3.9604	10.8911	2.9703	6.27063	2.31023	4.62046	303
ENSSSA1UGT000818	3.55828	3.06748	2.08589	2.69939	7.97546	4.41718	2.33129	7.36196	8.22086	11.6564	2.33129	6.74847	3.31288	4.04908	6.50307	8.83436	5.39877	5.39877	1.47239	2.57669	815
ENSSSA1UGT000819	3.36538	3.6859	2.72436	4.00641	6.25	5.76923	3.20513	7.37179	5.76923	10.5769	1.76282	5.12821	3.04487	4.16667	7.85256	10.0962	6.57051	4.00641	1.76282	2.88462	624
ENSSSA1UGT000821	3.3419	3.08483	5.14139	5.01285	6.16967	5.01285	2.82776	6.55527	7.32648	11.8252	1.28535	5.01285	3.3419	4.49871	4.88432	9.6401	6.2982	4.75578	0.899743	3.08483	778
ENSSSA1UGT000822	7.74648	8.4507	4.92958	3.52113	5.6338	6.33803	1.40845	4.22535	2.11268	8.4507	0	4.22535	2.8169	3.52113	7.04225	13.3803	4.92958	4.92958	0.704225	5.6338	142
ENSSSA1UGT000824	5.16987	4.43131	5.16987	6.35155	3.98818	2.95421	2.95421	5.31758	5.613	15.3619	1.92024	5.31758	4.2836	3.39734	4.72674	9.8966	5.02216	6.35155	0.738552	1.03397	677
ENSSSA1UGT000826	3.84615	4.28994	1.47929	3.40237	5.02959	5.47337	2.51479	5.91716	6.21302	9.02367	2.81065	3.99408	6.21302	4.73373	9.31953	10.355	6.80473	3.99408	2.66272	1.92308	676
ENSSSA1UGT000827	3.30827	3.15789	3.15789	2.55639	7.96992	2.70677	2.10526	6.31579	8.27068	11.2782	1.35338	6.61654	4.51128	4.06015	5.41353	9.47368	5.11278	7.5188	0.902256	4.21053	665
ENSSSA1UGT000829	7.07965	0	1.32743	3.09735	3.09735	1.76991	2.21239	3.9823	2.65487	7.52212	0.884956	3.09735	11.5044	3.9823	5.75221	18.1416	18.5841	2.65487	1.76991	0.884956	226
ENSSSA1UGT000830	4.13223	4.33884	4.33884	5.2686	6.92149	3.92562	2.68595	7.02479	5.2686	10.0207	3.5124	5.99174	5.57851	4.54545	4.33884	9.09091	4.23554	5.2686	0.516529	2.99587	968
ENSSSA1UGT000831	3.68852	2.86885	2.86885	2.45902	4.09836	3.68852	5.32787	4.91803	5.7377	8.60656	0.819672	7.37705	5.32787	6.14754	9.01639	8.60656	6.96721	7.78689	1.22951	2.45902	244
ENSSSA1UGT000832	2.32198	4.64396	3.40557	6.81115	6.34675	3.71517	6.50155	6.19195	6.34675	8.04954	1.08359	5.26316	3.71517	3.25077	5.88235	12.8483	8.20433	3.71517	0.464396	1.23839	646
ENSSSA1UGT000833	5.93472	5.34125	4.1543	4.1543	6.82493	6.52819	3.85757	2.37389	4.1543	6.82493	0.890208	3.56083	10.6825	3.56083	7.71513	10.089	4.45104	5.63798	1.48368	1.78042	337
ENSSSA1UGT000837	2.95858	1.57791	9.07298	7.69231	6.70611	4.73373	2.95858	7.10059	9.27022	8.28402	1.18343	3.94477	6.50888	2.95858	1.57791	5.71992	4.33925	7.10059	2.5641	3.74753	507
ENSSSA1UGT000838	7.88177	0.985222	3.44828	14.7783	2.95567	1.47783	1.97044	4.92611	14.7783	8.867	3.44828	5.41872	0	7.38916	3.44828	7.38916	3.44828	5.41872	0	1.97044	203
ENSSSA1UGT000839	4.44915	3.60169	4.02542	5.50847	2.9661	9.74576	2.33051	2.9661	6.99153	5.9322	0.635593	5.29661	5.08475	4.02542	9.95763	11.0169	3.81356	5.29661	2.54237	3.81356	472
ENSSSA1UGT000842	3.29489	3.13015	4.28336	4.28336	10.8731	3.13015	3.29489	6.2603	10.2142	11.3674	2.14168	4.28336	4.28336	3.78913	3.29489	9.71993	4.77759	4.44811	0.329489	2.80066	607
ENSSSA1UGT000843	6.36856	3.11653	4.87805	7.45257	5.01355	4.06504	2.43902	7.45257	6.77507	10.1626	1.76152	3.92954	4.20054	4.20054	5.55556	8.40108	5.28455	5.42005	0.813008	2.71003	738
ENSSSA1UGT000844	7.40072	1.98556	2.52708	3.97112	5.41516	2.70758	2.52708	5.05415	7.40072	8.66426	0.722022	4.33213	8.84477	3.2491	1.98556	11.5523	11.0108	8.48375	0.722022	1.44404	554
ENSSSA1UGT000847	8.26087	3.04348	6.52174	6.08696	6.08696	4.78261	3.47826	7.82609	8.26087	7.82609	3.04348	2.6087	4.34783	1.73913	6.52174	7.82609	3.04348	6.52174	0	2.17391	230
ENSSSA1UGT000848	10.4167	2.60417	4.16667	8.33333	5.72917	5.20833	2.08333	3.125	16.1458	3.125	3.64583	2.60417	4.6875	2.60417	8.33333	4.16667	3.64583	4.6875	1.5625	3.125	192
ENSSSA1UGT000851	5.75636	4.95315	5.62249	5.48862	4.14993	5.89023	2.40964	6.4257	4.55154	9.10308	1.47256	4.68541	3.74833	3.61446	6.0241	9.10308	7.49665	6.69344	0.535475	2.27577	747
ENSSSA1UGT000852	5.19481	1.94805	5.84416	4.54545	5.19481	3.24675	1.2987	9.74026	9.09091	9.09091	1.2987	7.14286	1.94805	5.19481	5.19481	7.79221	3.8961	7.79221	1.2987	3.24675	154
ENSSSA1UGT000853	7.23684	3.28947	7.89474	7.23684	5.92105	5.92105	3.28947	5.92105	7.89474	11.8421	1.31579	3.94737	3.28947	3.28947	1.97368	4.60526	5.26316	5.26316	0.657895	3.94737	152
ENSSSA1UGT000854	3.5461	4.25532	2.83688	5.67376	8.51064	4.25532	0.70922	3.5461	1.41844	13.4752	2.12766	1.41844	7.80142	4.96454	5.67376	7.0922	7.0922	9.21986	3.5461	2.83688	141
ENSSSA1UGT000855	5.5607	2.1316	3.15107	6.67285	5.18999	4.17053	2.68767	7.32159	9.63855	9.4532	2.03892	4.81928	4.26321	4.7266	6.20945	7.04356	4.35589	6.30213	1.57553	2.68767	1079
ENSSSA1UGT000857	4.59519	4.814	5.03282	5.47046	4.814	5.47046	7.87746	6.12691	7.87746	5.47046	0.218818	3.71991	5.25164	2.407	5.25164	13.5667	7.87746	2.84464	0	1.31291	457
ENSSSA1UGT000861	6.28571	1.42857	4.57143	4.85714	9.14286	4	3.71429	7.14286	6.28571	7.42857	3.71429	5.71429	6	3.42857	5.71429	5.42857	5.14286	6.28571	0.857143	2.85714	350
ENSSSA1UGT000864	3.7594	2.25564	5.07519	7.70677	6.20301	4.51128	1.8797	7.70677	7.70677	11.2782	1.50376	3.19549	4.88722	3.94737	3.00752	8.45865	5.82707	6.39098	0.93985	3.7594	532
ENSSSA1UGT000865	3.95315	3.3675	2.04978	3.66032	6.14934	2.92826	3.80673	6.58858	6.44217	10.6881	2.04978	4.97804	3.3675	4.24597	8.05271	9.0776	8.49195	4.68521	1.1713	4.24597	683
ENSSSA1UGT000867	2.15054	4.30108	1.07527	5.37634	13.9785	3.22581	1.07527	5.37634	3.22581	22.5806	2.15054	2.15054	1.07527	2.15054	2.15054	10.7527	4.30108	7.52688	1.07527	4.30108	93
ENSSSA1UGT000868	5.64827	2.43902	6.41849	5.77664	3.20924	4.36457	2.9525	6.67522	5.77664	13.6072	2.05392	5.39153	3.33761	4.49294	5.26316	8.21566	4.36457	6.41849	0.898588	2.69576	779
ENSSSA1UGT000870	3.9039	1.8018	2.4024	2.4024	3.003	6.30631	3.6036	3.003	3.6036	9.90991	0.900901	2.4024	9.90991	6.90691	10.2102	16.2162	4.5045	4.5045	1.8018	2.7027	333
ENSSSA1UGT000871	7.85498	0.906344	3.02115	6.0423	3.32326	7.85498	4.22961	2.71903	1.81269	10.2719	1.20846	2.71903	7.25076	6.0423	12.6888	8.76133	5.43807	5.74018	1.20846	0.906344	331
ENSSSA1UGT000872	4.74255	2.30352	4.60705	4.60705	7.45257	5.69106	2.30352	6.36856	6.50407	8.67209	3.38753	4.87805	3.92954	2.43902	7.04607	8.13008	4.74255	6.50407	1.21951	4.47154	738
ENSSSA1UGT000874	5.59322	2.54237	3.13559	5.42373	6.94915	4.91525	2.37288	6.18644	6.52542	10.2542	2.45763	3.47458	5.16949	4.0678	5.9322	8.64407	5.76271	6.10169	0.932203	3.55932	1180
ENSSSA1UGT000875	3.8176	1.9088	4.87805	6.04454	5.93849	3.28738	2.01485	3.92365	9.01379	11.2407	2.75716	7.21103	5.30223	3.28738	5.93849	10.8165	4.45387	3.92365	0.636267	3.60551	943
ENSSSA1UGT000877	6.89655	0.344828	7.58621	13.4483	2.06897	2.75862	1.03448	1.72414	18.6207	5.86207	2.75862	3.7931	5.86207	4.82759	6.89655	5.17241	3.10345	4.82759	0	2.41379	290
ENSSSA1UGT000881	3.74332	2.54011	4.67914	4.94652	3.47594	4.54545	2.27273	4.14439	5.48128	8.42246	2.27273	5.74866	10.6952	4.14439	8.15508	10.8289	5.88235	4.94652	0.534759	2.54011	748
ENSSSA1UGT000882	4.3956	1.64835	5.41601	5.18053	6.90738	3.53218	3.45369	6.59341	7.69231	10.9105	0.941915	5.88697	6.12245	3.2967	4.23862	8.8697	5.41601	6.90738	0.549451	2.04082	1274
ENSSSA1UGT000883	7.04023	1.43678	6.03448	10.9195	3.16092	3.3046	1.86782	4.31034	11.7816	8.90805	2.58621	3.59195	4.31034	3.59195	6.03448	8.33333	4.5977	5.45977	1.00575	1.72414	696
ENSSSA1UGT000884	3.61446	1.20482	13.253	10.8434	3.61446	7.22892	2.40964	4.81928	4.81928	10.8434	2.40964	3.61446	3.61446	4.81928	3.61446	6.0241	3.61446	6.0241	2.40964	1.20482	83
ENSSSA1UGT000887	8.20584	2.92072	3.75522	3.47705	3.8943	8.06676	4.86787	2.50348	2.22531	11.6829	0.69541	3.33797	6.67594	5.00695	12.5174	6.67594	3.75522	7.09318	1.11266	1.5299	719
ENSSSA1UGT000892	10.9589	9.58904	9.58904	5.47945	6.84932	5.47945	2.73973	4.10959	5.47945	4.10959	5.47945	1.36986	1.36986	2.73973	6.84932	4.10959	2.73973	5.47945	1.36986	4.10959	73
ENSSSA1UGT000894	4.37756	3.14637	2.59918	4.10397	7.11354	4.10397	3.69357	7.52394	5.88235	9.30233	1.50479	4.78796	5.33516	2.59918	4.78796	10.3967	5.06156	7.79754	1.77839	4.10397	731
ENSSSA1UGT000900	9.11017	3.17797	2.11864	4.44915	6.99153	6.77966	0.847458	7.41525	3.60169	12.2881	1.69492	1.90678	3.38983	3.38983	2.9661	7.62712	7.20339	9.5339	2.33051	3.17797	472
ENSSSA1UGT000901	8.14917	2.90055	2.20994	3.1768	6.35359	4.14365	1.79558	5.93923	2.90055	11.1878	2.62431	4.41989	6.21547	2.20994	8.56354	8.28729	5.38674	8.01105	1.38122	4.14365	724
ENSSSA1UGT000902	2.11268	2.8169	3.52113	5.28169	5.28169	3.52113	2.46479	7.04225	7.04225	14.0845	3.52113	3.16901	3.52113	5.98592	7.04225	8.09859	4.57746	7.04225	2.8169	1.05634	284
ENSSSA1UGT000904	5.70571	2.7027	1.2012	3.15315	3.6036	2.85285	3.6036	3.45345	5.55556	13.0631	2.85285	5.25526	4.95495	6.15616	7.80781	11.7117	7.65766	5.40541	1.5015	1.8018	666
ENSSSA1UGT000906	5.14286	3.14286	5.71429	4.85714	4	4.57143	2.85714	4.57143	9.14286	10.5714	2.57143	4.28571	4	4.57143	3.14286	10	5.71429	6.85714	0.857143	3.42857	350
ENSSSA1UGT000907	5.68182	0	5.68182	5.68182	3.40909	9.09091	3.40909	9.09091	6.81818	4.54545	0	4.54545	7.95455	4.54545	6.81818	9.09091	5.68182	6.81818	1.13636	0	88
ENSSSA1UGT000908	3.7415	4.08163	3.40136	3.57143	5.78231	3.57143	2.72109	6.12245	5.10204	11.7347	2.55102	5.95238	3.23129	5.61224	7.65306	10.8844	4.7619	5.27211	1.70068	2.55102	588
ENSSSA1UGT000909	4.41899	1.30933	7.36498	9.49264	6.21931	4.74632	1.63666	5.07365	10.802	9.98363	2.29133	4.41899	4.25532	3.76432	5.72831	6.05565	3.92799	4.58265	0.981997	2.94599	611
ENSSSA1UGT000911	4.73485	1.70455	6.25	7.00758	6.81818	4.35606	3.59848	5.49242	7.00758	9.4697	2.27273	5.30303	3.59848	2.65152	5.68182	5.87121	5.11364	6.62879	1.13636	5.30303	528
ENSSSA1UGT000913	5.17241	2.95567	3.69458	5.41872	4.18719	2.95567	2.21675	8.12808	6.15764	13.3005	3.20197	3.94089	3.69458	4.6798	5.17241	8.867	4.92611	6.89655	0.246305	4.18719	406
ENSSSA1UGT000915	6.4588	1.67038	4.89978	7.7951	4.34298	3.56347	2.44989	8.24053	9.1314	14.4766	1.67038	7.46102	2.22717	3.00668	3.56347	7.12695	3.67483	6.23608	0.222717	1.78174	898
ENSSSA1UGT000916	5.62061	2.10773	7.37705	6.79157	5.15222	2.57611	2.22482	6.55738	7.49415	11.007	1.75644	6.44028	3.39578	2.8103	5.15222	9.60187	4.56674	6.08899	0.819672	2.45902	854
ENSSSA1UGT000918	4.73485	3.59848	2.84091	6.06061	6.81818	3.59848	3.0303	7.19697	7.00758	10.6061	3.0303	6.06061	3.2197	3.78788	4.73485	8.14394	4.54545	7.00758	0.94697	3.0303	528
ENSSSA1UGT000920	5.67901	1.85185	4.07407	4.5679	7.16049	3.95062	2.59259	6.41975	3.7037	12.5926	1.7284	5.30864	4.5679	2.83951	7.77778	8.88889	5.30864	6.91358	0.246914	3.82716	810
ENSSSA1UGT000922	3.55769	2.88462	1.82692	2.98077	6.82692	5.48077	2.78846	7.30769	7.59615	9.03846	2.40385	4.80769	3.17308	4.13462	8.36538	10.1923	6.05769	4.80769	2.69231	3.07692	1040
ENSSSA1UGT000923	2.3569	2.18855	2.6936	3.19865	4.0404	4.88215	2.3569	7.23906	9.42761	10.4377	2.0202	5.05051	4.54545	3.53535	9.76431	9.59596	6.22896	5.21886	1.51515	3.7037	594
ENSSSA1UGT000927	6.76737	1.69184	4.22961	6.34441	5.61934	5.92145	1.81269	6.34441	4.95468	11.9033	3.20242	4.16918	3.6858	3.32326	5.37764	6.94864	6.40483	6.22356	1.45015	3.62538	1655
ENSSSA1UGT000929	3.92749	2.71903	4.22961	4.53172	6.0423	5.43807	2.71903	6.34441	3.62538	8.1571	1.51057	4.83384	5.74018	3.32326	9.36556	9.96979	4.83384	6.64653	2.71903	3.32326	331
ENSSSA1UGT000930	4.95868	2.89256	1.65289	3.09917	4.95868	3.71901	3.71901	4.95868	5.57851	9.71074	1.65289	2.68595	5.16529	3.92562	7.85124	17.7686	4.33884	5.16529	2.47934	3.71901	484
ENSSSA1UGT000931	9.35961	1.14943	4.7619	6.73235	4.26929	9.85222	3.61248	4.92611	5.09031	8.70279	1.97044	3.61248	6.23974	3.28407	4.10509	7.38916	4.26929	7.71757	0.985222	1.97044	609
ENSSSA1UGT000933	4.52261	1.00503	5.27638	5.52764	3.51759	3.51759	3.26633	8.29146	8.54271	12.3116	0.753769	5.02513	5.52764	3.01508	5.77889	5.77889	7.28643	5.27638	1.75879	4.0201	398
ENSSSA1UGT000934	5.11509	2.55754	5.11509	3.58056	6.64962	4.85934	2.04604	5.37084	7.16113	10.7417	2.55754	3.58056	5.6266	3.06905	4.85934	8.4399	6.64962	7.92839	0.511509	3.58056	391
ENSSSA1UGT000935	7.92768	2.64256	4.31154	3.75522	3.61613	8.76217	3.75522	4.17246	3.33797	9.04033	0.834492	3.75522	8.20584	3.19889	11.2656	8.34492	4.58971	5.84145	0.556328	2.08623	719
ENSSSA1UGT000936	6.79348	5.61594	5.70652	6.06884	4.34783	4.43841	2.53623	5.88768	7.42754	11.0507	2.44565	5.25362	5.3442	3.98551	3.17029	6.61232	4.34783	6.06884	0.815217	2.08333	1104
ENSSSA1UGT000937	4.92487	2.17028	5.92654	7.76294	4.09015	5.25876	2.00334	5.7596	10.0167	8.1803	2.08681	6.84474	3.25543	2.67112	5.25876	6.42738	6.34391	6.26043	1.25209	3.50584	1198
ENSSSA1UGT000942	3.08789	0	7.36342	5.93824	8.7886	11.1639	4.27553	3.80048	6.4133	6.17577	4.27553	4.51306	4.27553	2.85036	6.65083	10.4513	4.27553	3.56295	0.475059	1.66271	421
ENSSSA1UGT000943	9.52381	0.793651	4.7619	7.14286	4.7619	3.96825	3.1746	6.34921	4.7619	10.3175	1.5873	6.34921	2.38095	5.55556	5.55556	7.93651	5.55556	3.96825	1.5873	3.96825	126
ENSSSA1UGT000946	4.64567	2.04724	6.37795	4.72441	4.64567	3.93701	3.30709	7.00787	4.48819	13.3858	1.65354	9.05512	2.99213	3.46457	4.72441	8.4252	4.88189	5.82677	1.1811	3.22835	1270
ENSSSA1UGT000948	3.35196	3.72439	2.17256	3.53818	4.90379	2.545	1.55183	7.57294	7.57294	13.9665	4.96586	5.3383	3.16574	4.77964	6.64184	6.82806	5.52452	6.89013	1.55183	3.41403	1611
ENSSSA1UGT000949	4.66531	1.21704	3.85396	4.86815	8.31643	4.46247	4.0568	9.93915	5.07099	10.3448	2.23124	5.67951	5.47667	2.23124	4.86815	5.88235	6.28803	6.89655	1.0142	2.63692	493
ENSSSA1UGT000950	2.63158	1.75439	2.63158	2.63158	10.5263	4.38596	4.38596	11.4035	1.75439	13.1579	0.877193	8.77193	4.38596	4.38596	5.26316	8.77193	4.38596	3.50877	0.877193	3.50877	114
ENSSSA1UGT000951	7.14286	2.38095	4.7619	0	3.57143	5.95238	8.33333	0	13.0952	11.9048	2.38095	8.33333	1.19048	2.38095	8.33333	8.33333	3.57143	7.14286	1.19048	0	84
ENSSSA1UGT000952	3.29412	4.47059	2.82353	4.23529	9.41176	4.23529	4	6.11765	6.82353	10.3529	0.941176	4.47059	2.35294	3.29412	7.05882	8.94118	5.88235	5.17647	1.41176	4.70588	425
ENSSSA1UGT000955	5.72917	2.60417	5.46875	7.29167	4.16667	4.94792	3.125	4.94792	8.33333	7.03125	2.34375	3.125	5.98958	3.38542	8.07292	6.51042	5.98958	6.51042	2.08333	2.34375	384
ENSSSA1UGT000958	8.33333	1.38889	6.94444	8.33333	5.09259	5.09259	1.85185	4.62963	7.40741	11.5741	4.16667	3.24074	4.62963	4.62963	3.7037	5.09259	5.55556	4.16667	0.925926	3.24074	216
ENSSSA1UGT000959	4.1958	2.7972	0.932401	3.0303	8.39161	3.9627	1.6317	9.09091	8.39161	8.85781	1.6317	6.29371	4.4289	4.1958	6.99301	10.4895	4.8951	5.36131	0.4662	3.9627	429
ENSSSA1UGT000960	3.21285	3.81526	3.41365	3.81526	6.82731	3.61446	4.21687	8.83534	5.02008	13.4538	1.80723	4.81928	3.81526	4.61847	4.81928	9.23695	3.81526	5.62249	1.40562	3.81526	498
ENSSSA1UGT000961	4.17495	1.19284	5.36779	6.36183	4.77137	4.57256	1.78926	5.76541	8.54871	10.1392	2.7833	4.57256	7.15706	7.55467	6.16302	5.5666	4.97018	4.77137	1.19284	2.58449	503
ENSSSA1UGT000971	5.5313	4.36681	3.05677	2.62009	6.69578	3.78457	3.34789	6.2591	4.51237	8.29694	0.873362	4.80349	4.80349	3.78457	8.73362	12.6638	5.82242	4.51237	2.62009	2.91121	687
ENSSSA1UGT000975	5.39683	1.5873	5.39683	5.71429	1.5873	6.03175	3.49206	6.34921	7.30159	7.93651	2.53968	5.39683	5.07937	3.1746	6.34921	8.57143	6.34921	6.98413	1.90476	2.85714	315
ENSSSA1UGT000979	6.4389	3.28515	4.99343	4.59921	3.94218	6.70171	5.78187	4.07359	4.3364	8.27858	1.44547	3.02234	6.04468	4.73062	12.0894	8.6728	4.3364	4.20499	0.788436	2.2339	761
ENSSSA1UGT000980	4.3956	3.11355	1.0989	9.15751	4.21245	4.0293	1.4652	5.86081	8.42491	10.6227	2.38095	4.21245	3.2967	2.74725	11.7216	7.14286	5.67766	6.22711	1.28205	2.9304	546
ENSSSA1UGT000981	4.16667	1.89394	2.77778	2.90404	7.95455	5.80808	1.89394	7.57576	5.80808	12.8788	3.0303	5.55556	2.52525	2.90404	3.40909	7.82828	5.68182	7.44949	1.64141	6.31313	792
ENSSSA1UGT000982	3.21839	2.29885	3.67816	3.67816	10.3448	3.90805	2.52874	7.81609	7.12644	8.73563	1.14943	3.90805	4.5977	4.13793	7.35632	11.4943	4.13793	4.36782	1.83908	3.67816	435
ENSSSA1UGT000985	3.1746	3.43915	2.6455	5.55556	5.55556	4.2328	4.49735	7.14286	8.20106	8.20106	2.6455	5.82011	5.02646	3.43915	5.02646	8.99471	5.55556	5.55556	2.1164	3.1746	378
ENSSSA1UGT000986	4.87239	2.08817	3.13225	5.91647	2.32019	6.49652	1.16009	4.9884	6.2645	8.46868	3.01624	5.91647	13.3411	3.48028	6.38051	8.12065	5.56845	5.10441	1.04408	2.32019	862
ENSSSA1UGT000990	8.38926	3.02013	3.3557	3.18792	6.87919	5.7047	1.34228	4.5302	4.02685	7.21477	1.67785	3.02013	5.87248	3.3557	10.7383	11.745	6.54362	4.5302	2.18121	2.68456	596
ENSSSA1UGT000991	6.48855	3.43511	1.52672	3.05344	4.58015	3.05344	6.48855	4.96183	3.81679	9.92366	1.14504	4.58015	3.05344	2.67176	12.5954	11.8321	5.34351	7.63359	1.9084	1.9084	262
ENSSSA1UGT000994	3.08582	3.18226	1.25362	2.15365	4.43587	2.76438	2.4108	5.9145	8.87175	11.9576	3.7287	3.85728	5.01446	5.40019	6.52523	12.7612	6.75024	5.20733	2.25008	2.47509	3111
ENSSSA1UGT000995	6.08466	2.91005	1.85185	5.29101	6.34921	5.02646	1.85185	7.14286	8.73016	10.582	2.6455	4.49735	5.55556	3.43915	3.96825	7.67196	5.02646	6.34921	0.529101	4.49735	378
ENSSSA1UGT000996	4.54545	4.54545	1.51515	3.0303	4.54545	4.54545	10.6061	4.54545	12.1212	4.54545	1.51515	6.06061	3.0303	6.06061	9.09091	6.06061	4.54545	0	3.0303	6.06061	66
ENSSSA1UGT000997	4.59519	2.18818	5.47046	8.53392	2.84464	8.09628	1.31291	5.25164	9.19037	9.40919	2.62582	2.18818	2.18818	5.25164	8.97155	3.93873	3.93873	7.87746	3.06346	3.06346	457
ENSSSA1UGT000998	14.1538	0.923077	0.615385	0.923077	9.23077	20.6154	0.307692	1.23077	2.15385	9.53846	0.307692	0	7.07692	0.615385	6.76923	8	7.07692	4	2.76923	3.69231	325
ENSSSA1UGT000999	8.54987	1.34116	4.44258	6.53814	3.85583	5.95138	3.93965	7.20872	8.46605	11.3998	1.76027	7.8793	2.2632	2.51467	3.26907	6.03521	5.69992	5.95138	0.335289	2.59849	1193
ENSSSA1UGT001000	3.61446	2.71084	3.61446	9.03614	3.01205	3.61446	2.40964	6.62651	12.0482	9.63855	1.20482	7.83133	9.33735	4.81928	3.01205	2.71084	8.13253	3.31325	0.903614	2.40964	332
ENSSSA1UGT001003	3.53228	2.19245	3.65408	5.72473	7.30816	2.80146	1.82704	7.67357	8.03898	10.3532	1.82704	5.35932	4.01949	4.3849	5.60292	9.50061	4.7503	5.84653	0.974421	4.6285	821
ENSSSA1UGT001005	3.7037	4.62963	3.00926	4.39815	6.01852	7.17593	3.93519	5.78704	6.01852	10.6481	1.38889	5.32407	1.62037	4.62963	7.17593	11.8056	3.7037	4.16667	2.31481	2.5463	432
ENSSSA1UGT001010	4.12783	1.99734	4.92676	6.12517	6.25832	4.92676	2.13049	6.12517	8.25566	10.6525	2.26365	6.52463	3.46205	3.19574	6.79095	6.52463	3.06258	7.98935	0.798935	3.86152	751
ENSSSA1UGT001011	5.46448	1.63934	4.37158	4.37158	6.01093	5.46448	3.82514	7.10383	3.27869	10.929	0.546448	5.46448	5.46448	3.27869	2.73224	8.74317	4.37158	7.10383	1.0929	8.74317	183
ENSSSA1UGT001012	5.18135	1.03627	10.1036	5.69948	2.84974	6.47668	1.29534	3.88601	3.36788	8.54922	1.29534	4.40415	5.69948	11.658	2.33161	9.06736	6.99482	8.29016	0.777202	1.03627	386
ENSSSA1UGT001013	3.82979	1.2766	3.40426	7.23404	4.68085	4.25532	2.12766	7.65957	4.25532	10.6383	2.97872	8.51064	5.53191	4.25532	6.80851	5.95745	5.95745	4.25532	1.70213	4.68085	235
ENSSSA1UGT001015	4.56731	2.04327	3.84615	5.04808	7.93269	3.36538	3.00481	6.00962	4.92788	9.49519	1.80288	5.52885	5.16827	3.36538	5.64904	11.5385	6.00962	5.76923	1.5625	3.36538	832
ENSSSA1UGT001016	3.09598	2.78638	1.85759	3.71517	5.26316	4.95356	3.40557	3.71517	6.81115	9.28793	2.78638	4.64396	4.95356	4.64396	9.90712	12.0743	8.04954	4.64396	1.23839	2.16718	323
ENSSSA1UGT001017	10.2941	8.82353	0	7.35294	2.94118	0	4.41176	2.94118	10.2941	7.35294	1.47059	2.94118	4.41176	4.41176	2.94118	7.35294	7.35294	8.82353	0	5.88235	68
ENSSSA1UGT001026	3.4965	2.5641	4.4289	5.36131	6.52681	3.2634	3.7296	7.92541	6.52681	8.85781	2.0979	5.59441	3.9627	5.12821	5.59441	10.2564	5.59441	5.36131	0.932401	2.7972	429
ENSSSA1UGT001027	4.20354	3.53982	2.21239	5.97345	9.29204	4.64602	1.32743	7.52212	4.64602	9.51327	1.76991	6.85841	2.21239	3.31858	5.30973	8.40708	5.30973	6.41593	0.884956	6.63717	452
ENSSSA1UGT001032	5.19288	2.52226	5.93472	4.30267	5.93472	3.26409	4.59941	5.63798	6.67656	12.908	1.63205	5.19288	4.45104	4.1543	4.89614	6.97329	3.7092	8.01187	0.74184	3.26409	674
ENSSSA1UGT001033	6.06061	1.443	4.7619	6.06061	3.1746	8.22511	1.7316	5.48341	4.4733	9.95671	1.443	3.6075	6.92641	2.4531	6.06061	8.51371	7.93651	5.62771	2.1645	3.8961	693
ENSSSA1UGT001034	5.94059	4.10184	5.16266	6.01132	4.66761	3.39463	2.12164	6.57709	6.71853	10.1132	1.9802	4.38472	6.08204	4.59689	5.16266	8.84017	4.80905	5.58699	0.919378	2.82885	1414
ENSSSA1UGT001035	11.5226	2.05761	3.29218	6.58436	1.23457	2.88066	2.05761	6.17284	9.46502	13.5802	2.05761	3.29218	2.88066	4.93827	3.29218	9.0535	4.52675	4.93827	0.411523	5.76132	243
ENSSSA1UGT001038	7.22892	6.0241	4.21687	6.0241	4.21687	4.21687	3.61446	1.80723	6.0241	5.42169	1.80723	3.01205	6.0241	4.21687	3.61446	10.8434	7.83133	6.0241	0.60241	7.22892	166
ENSSSA1UGT001039	2.96296	2.22222	3.7037	2.22222	3.7037	5.92593	1.48148	3.7037	8.88889	4.44444	2.96296	3.7037	7.40741	3.7037	8.88889	24.4444	3.7037	4.44444	0	1.48148	135
ENSSSA1UGT001041	5.38847	1.8797	6.89223	10.401	6.01504	4.88722	1.50376	5.38847	7.76942	8.39599	2.00501	5.88972	5.38847	3.00752	3.50877	8.27068	5.6391	4.01003	0.877193	2.88221	798
ENSSSA1UGT001042	7.16912	2.20588	3.125	6.98529	6.25	2.94118	1.65441	6.25	7.72059	9.74265	1.10294	5.33088	5.51471	4.22794	6.98529	8.82353	3.125	6.06618	2.02206	2.75735	544
ENSSSA1UGT001046	7.03235	2.1097	3.65682	3.51617	6.75105	5.62588	3.23488	4.92264	8.15752	8.29817	1.82841	5.34459	6.46976	2.1097	3.93812	9.98594	5.34459	6.32911	0.843882	4.5007	711
ENSSSA1UGT001048	5.29301	2.26843	3.59168	4.7259	5.10397	4.34783	2.6465	6.61626	8.12854	11.1531	2.45747	6.42722	2.83554	3.21361	6.80529	8.12854	5.48204	6.99433	0.756144	3.02457	529
ENSSSA1UGT001049	3.33333	4.31373	2.7451	4.70588	8.62745	3.52941	3.52941	7.05882	9.60784	11.1765	1.96078	4.11765	3.72549	3.92157	5.4902	8.23529	5.09804	4.70588	0.196078	3.92157	510
ENSSSA1UGT001050	4.51807	3.01205	1.20482	2.71084	4.81928	2.10843	3.01205	4.21687	6.0241	12.0482	3.31325	6.3253	5.42169	4.21687	5.42169	10.5422	12.0482	6.0241	2.10843	0.903614	332
ENSSSA1UGT001051	4.38972	3.53319	5.35332	6.42398	4.60385	4.38972	3.74732	5.99572	6.53105	7.17345	1.17773	5.56745	5.13919	3.10493	7.70878	9.63597	5.78158	5.99572	1.07066	2.67666	934
ENSSSA1UGT001052	3.02376	1.51188	5.61555	7.34341	3.88769	7.12743	1.2959	7.77538	11.2311	13.6069	2.59179	4.75162	1.2959	1.94384	8.42333	3.88769	2.37581	6.69546	2.59179	3.02376	463
ENSSSA1UGT001054	4.37376	2.38569	5.96421	7.15706	4.37376	7.15706	1.39165	5.36779	7.75348	9.14513	2.98211	2.58449	2.38569	4.57256	8.74751	4.77137	3.97614	8.3499	2.58449	3.97614	503
ENSSSA1UGT001055	2.72109	3.57143	2.38095	4.08163	4.59184	3.91156	2.21088	6.29252	5.78231	9.86395	1.87075	5.95238	3.23129	4.7619	8.16327	10.8844	7.65306	6.29252	2.04082	3.7415	588
ENSSSA1UGT001057	3.05958	1.93237	2.57649	4.83092	2.89855	4.34783	3.38164	4.50886	3.7037	8.05153	2.0934	5.63607	9.17874	4.50886	6.76329	18.3575	6.44122	4.02576	0.644122	3.05958	621
ENSSSA1UGT001059	8.20896	0	5.22388	8.20896	4.47761	8.95522	3.73134	5.22388	11.194	11.9403	2.23881	5.22388	3.73134	1.49254	5.97015	1.49254	4.47761	3.73134	0.746269	3.73134	134
ENSSSA1UGT001060	3.44828	3.44828	2.49042	3.63985	7.27969	4.5977	4.21456	5.9387	4.78927	8.42912	1.341	5.36398	2.68199	5.55556	9.57854	12.8352	4.78927	4.78927	1.341	3.44828	522
ENSSSA1UGT001061	6.57895	1.31579	3.61842	7.40132	7.73026	4.11184	1.64474	6.74342	7.40132	9.21053	2.13816	4.11184	3.94737	4.27632	4.76974	10.0329	3.45395	6.41447	1.48026	3.61842	608
ENSSSA1UGT001062	5.81633	3.26531	4.28571	5.10204	7.65306	4.69388	1.73469	6.53061	7.2449	9.28571	2.2449	5.10204	3.77551	3.46939	4.28571	8.97959	7.04082	5.71429	0.816327	2.95918	980
ENSSSA1UGT001064	3.34988	2.97767	1.6129	3.10174	3.72208	9.42928	1.11663	5.7072	7.19603	9.18114	2.8536	2.8536	3.84615	2.72953	12.0347	12.531	6.69975	5.58313	2.35732	1.11663	806
ENSSSA1UGT001066	5.43478	2.17391	6.52174	4.34783	5.43478	3.26087	2.17391	4.34783	10.8696	4.34783	2.17391	8.69565	3.26087	3.26087	5.43478	3.26087	8.69565	13.0435	1.08696	2.17391	92
ENSSSA1UGT001067	6.09319	3.22581	3.58423	3.94265	9.319	7.16846	1.79211	6.45161	4.30108	12.1864	2.50896	6.09319	1.43369	2.50896	3.58423	8.60215	4.6595	7.52688	2.50896	2.50896	279
ENSSSA1UGT001071	8.64198	1.23457	1.23457	1.23457	11.1111	2.46914	0	8.64198	2.46914	16.0494	2.46914	4.93827	3.7037	0	4.93827	14.8148	6.17284	9.87654	0	0	81
ENSSSA1UGT001075	3.9548	2.82486	5.08475	3.9548	7.9096	6.77966	3.38983	6.21469	6.77966	11.2994	0.564972	4.51977	1.69492	1.69492	4.51977	10.1695	5.64972	6.77966	0.564972	5.64972	177
ENSSSA1UGT001077	7.62712	2.9661	4.02542	4.44915	4.02542	5.50847	2.11864	6.35593	8.26271	7.41525	2.11864	5.72034	3.60169	3.81356	5.08475	8.47458	5.9322	6.77966	2.54237	3.17797	472
ENSSSA1UGT001079	5.37897	3.66748	1.46699	3.91198	6.11247	3.42298	2.20049	2.68949	3.42298	13.2029	1.95599	3.17848	7.09046	4.88998	13.6919	8.31296	6.60147	3.91198	1.71149	3.17848	409
ENSSSA1UGT001081	5.16304	0.815217	10.8696	7.6087	2.17391	5.16304	2.98913	3.53261	6.25	7.88043	1.90217	2.98913	10.3261	4.8913	5.97826	6.79348	5.70652	5.16304	0.815217	2.98913	368
ENSSSA1UGT001084	3.5443	4.68354	4.81013	2.65823	6.07595	6.07595	4.68354	5.44304	4.55696	8.48101	1.13924	3.92405	4.3038	3.92405	11.0127	8.98734	3.41772	6.32911	3.16456	2.78481	790
ENSSSA1UGT001089	7.67824	0.457038	5.39305	4.38757	1.09689	7.86106	1.46252	2.74223	7.86106	3.19927	1.27971	2.28519	5.21024	1.00548	17.1846	24.223	1.91956	3.10786	0.639854	1.00548	1094
ENSSSA1UGT001092	5.96394	2.21914	2.77393	4.29958	5.40915	5.40915	3.6061	6.10264	4.02219	9.01526	0.970874	3.7448	6.24133	5.68655	6.79612	9.57004	8.32178	4.99307	1.24827	3.6061	721
ENSSSA1UGT001095	4.93056	2.5	2.91667	4.72222	2.5	5.13889	2.84722	4.16667	6.94444	5.97222	1.31944	5.90278	5.69444	3.88889	14.0278	9.93056	11.5278	3.40278	1.11111	0.555556	1440
ENSSSA1UGT001097	4.80929	2.48756	1.99005	4.31177	4.47761	5.14096	2.6534	6.46766	6.46766	7.62852	2.32172	6.13599	5.14096	2.15589	9.95025	13.267	6.13599	3.81426	1.99005	2.6534	603
ENSSSA1UGT001098	4.07609	4.34783	1.63043	2.17391	4.8913	5.16304	1.3587	5.16304	5.43478	10.0543	1.63043	4.61957	5.70652	4.61957	4.8913	12.5	10.8696	5.70652	2.71739	2.44565	368
ENSSSA1UGT001099	3.9726	2.19178	2.73973	9.45205	5.47945	5.47945	3.83562	6.0274	5.89041	9.31507	3.28767	5.34247	3.28767	2.19178	8.21918	8.08219	4.52055	7.12329	1.09589	2.46575	730
ENSSSA1UGT001100	5.88235	4.20168	10.084	7.56303	4.20168	6.72269	4.20168	6.72269	2.52101	11.7647	1.68067	4.20168	2.52101	2.52101	5.88235	4.20168	6.72269	6.72269	0	1.68067	119
ENSSSA1UGT001102	3.92157	2.52101	3.36134	5.60224	6.72269	1.96078	2.2409	7.56303	9.2437	8.40336	1.40056	5.32213	5.88235	3.64146	5.04202	11.7647	5.32213	6.44258	1.68067	1.96078	357
ENSSSA1UGT001105	4.76858	3.08555	1.54278	3.78682	6.73212	4.76858	1.12202	5.18934	5.8906	9.39691	1.26227	5.04909	7.15288	3.08555	10.6592	10.0982	7.57363	5.04909	1.68303	2.10379	713
ENSSSA1UGT001106	6.14973	2.6738	4.54545	4.54545	4.27807	5.88235	3.74332	8.28877	6.68449	9.89305	2.6738	5.08021	2.94118	2.6738	3.74332	9.35829	5.88235	7.75401	1.60428	1.60428	374
ENSSSA1UGT001108	7.60736	3.06748	3.31288	4.53988	5.39877	6.99387	4.29448	3.43558	4.66258	8.22086	1.34969	3.55828	6.62577	4.66258	11.1656	8.34356	4.41718	5.15337	0.736196	2.45399	815
ENSSSA1UGT001110	6.88	2.24	5.28	6.08	3.36	8.32	5.44	3.68	6.24	4.32	0.8	3.52	6.88	5.44	3.52	8.8	4.8	5.76	0.8	7.84	625
ENSSSA1UGT001111	7.28863	4.66472	5.8309	9.62099	3.207	3.79009	7.87172	4.08163	8.74636	4.95627	2.04082	4.08163	5.24781	2.04082	6.99708	6.70554	6.41399	6.12245	0	0.291545	343
ENSSSA1UGT001112	3.67347	1.22449	5.5102	6.12245	2.65306	4.4898	2.2449	9.18367	9.59184	11.0204	2.04082	6.93878	4.28571	2.44898	4.89796	7.34694	7.34694	4.4898	1.83673	2.65306	490
ENSSSA1UGT001113	3.94007	2.44173	1.27636	2.38624	3.32963	3.88457	3.55161	4.49501	10.1554	12.8746	2.49723	4.32852	5.4939	6.77026	8.43507	8.43507	6.27081	5.82686	2.16426	1.44284	1802
ENSSSA1UGT001114	7.31707	0.813008	2.43902	8.94309	0.813008	4.06504	1.62602	8.13008	11.3821	11.3821	2.43902	5.69106	8.94309	2.43902	3.25203	3.25203	5.69106	3.25203	3.25203	4.87805	123
ENSSSA1UGT001115	4.51745	4.92813	3.90144	4.31211	6.16016	4.72279	3.90144	5.95483	6.57084	9.65092	0.821355	4.92813	2.6694	3.6961	9.44559	9.24025	4.72279	4.51745	1.23203	4.10678	487
ENSSSA1UGT001119	6.15475	2.63775	4.33763	5.86166	4.9238	4.68933	2.40328	6.15475	7.26846	9.26143	1.81712	4.68933	6.44783	3.92732	5.80305	10.7855	4.10317	4.98242	0.996483	2.75498	1706
ENSSSA1UGT001120	5.55556	2.08333	2.08333	2.08333	6.25	4.16667	1.38889	6.25	9.72222	11.8056	1.38889	6.25	5.55556	4.86111	5.55556	10.4167	3.47222	6.25	0	4.86111	144
ENSSSA1UGT001130	6.25889	3.84068	3.84068	3.98293	3.41394	7.53912	5.6899	3.27169	3.27169	7.53912	0.56899	2.9872	6.25889	5.6899	11.8065	11.0953	4.12518	5.6899	1.13798	1.99147	703
ENSSSA1UGT001131	6.45161	2.41935	6.45161	10.4839	2.01613	2.41935	2.01613	4.03226	7.66129	8.46774	1.6129	4.83871	2.41935	3.22581	6.85484	18.1452	2.82258	4.83871	0.403226	2.41935	248
ENSSSA1UGT001133	5.19685	2.99213	4.88189	5.66929	5.35433	4.25197	2.3622	5.03937	4.56693	8.50394	2.51969	4.25197	5.19685	3.30709	7.87402	7.71654	7.08661	7.24409	1.41732	4.56693	635
ENSSSA1UGT001137	6.32244	2.4236	1.36986	1.26449	4.32034	4.10959	2.8451	4.42571	3.58272	6.32244	1.79136	2.95047	10.8535	2.95047	12.961	13.6986	11.275	4.21496	1.47524	0.842993	949
ENSSSA1UGT001138	6.38037	1.84049	4.53988	5.03067	4.90798	8.34356	2.69939	4.04908	3.80368	10.3067	2.82209	4.66258	6.62577	3.43558	6.62577	7.48466	6.01227	6.62577	1.47239	2.33129	815
ENSSSA1UGT001139	5.81761	1.57233	4.08805	7.38994	5.18868	1.88679	1.25786	4.55975	10.3774	7.7044	2.83019	3.93082	8.49057	4.71698	7.86164	9.59119	5.34591	5.81761	0.157233	1.41509	636
ENSSSA1UGT001140	11.7647	8.82353	2.94118	10.2941	1.47059	2.94118	1.47059	10.2941	10.2941	2.94118	5.88235	4.41176	5.88235	1.47059	7.35294	7.35294	4.41176	0	0	0	68
ENSSSA1UGT001141	8.7013	2.98701	4.02597	5.19481	2.72727	8.96104	2.72727	5.45455	4.02597	7.14286	1.16883	3.63636	6.88312	2.98701	7.53247	8.31169	5.97403	8.18182	1.2987	2.07792	770
ENSSSA1UGT001142	3.47826	2.93478	2.17391	4.45652	4.13043	3.69565	3.47826	4.8913	4.23913	10.6522	1.08696	4.67391	5.76087	4.13043	13.0435	11.7391	4.13043	5.86957	2.3913	3.04348	920
ENSSSA1UGT001144	2	2	11	5	10	3	1	5	7	8	2	9	3	1	12	9	1	4	1	4	100
ENSSSA1UGT001145	1.45455	3.27273	6.54545	9.45455	4.72727	3.27273	2.18182	4.72727	9.09091	9.81818	1.81818	5.45455	6.54545	4.36364	4.72727	9.09091	4.72727	5.81818	0.363636	2.54545	275
ENSSSA1UGT001146	6.31068	4.12621	4.12621	6.06796	5.58252	6.31068	2.91262	6.79612	5.58252	9.46602	2.91262	4.12621	3.39806	3.39806	5.82524	8.98058	3.64078	5.33981	2.18447	2.91262	412
ENSSSA1UGT001148	4.11523	0.823045	4.93827	7.40741	7.40741	8.23045	3.29218	7.81893	4.93827	9.0535	2.46914	7.40741	8.23045	1.64609	4.52675	3.7037	4.11523	4.93827	1.23457	3.7037	243
ENSSSA1UGT001149	3.663	2.5641	2.9304	6.95971	5.86081	2.9304	1.0989	8.42491	12.4542	8.05861	1.4652	5.12821	4.3956	4.0293	5.12821	8.42491	5.49451	6.95971	1.0989	2.9304	273
ENSSSA1UGT001150	8.44156	3.57143	4.22078	4.22078	3.24675	4.87013	1.94805	7.79221	7.14286	6.81818	2.27273	6.16883	4.87013	3.24675	5.19481	8.11688	4.87013	7.79221	2.27273	2.92208	308
ENSSSA1UGT001153	4.83871	3.22581	2.41935	9.67742	9.67742	1.6129	2.41935	7.25806	2.41935	8.06452	2.41935	1.6129	1.6129	7.25806	4.03226	8.87097	8.06452	8.87097	1.6129	4.03226	124
ENSSSA1UGT001155	4.22886	4.72637	3.48259	6.46766	2.98507	3.9801	4.22886	3.23383	10.4478	6.71642	1.74129	2.98507	5.72139	4.22886	9.70149	10.4478	6.96517	5.72139	0.248756	1.74129	402
ENSSSA1UGT001158	4.12926	4.12926	5.9246	3.94973	5.56553	6.4632	2.51346	6.28366	7.71993	8.61759	3.41113	4.66786	3.05206	3.94973	4.3088	8.43806	5.56553	7.0018	1.79533	2.51346	557
ENSSSA1UGT001160	4.69136	1.7284	5.4321	5.67901	3.20988	2.96296	2.96296	4.69136	5.4321	9.1358	2.22222	3.45679	6.66667	7.16049	8.14815	12.0988	4.69136	6.17284	1.48148	1.97531	405
ENSSSA1UGT001162	9.61538	4.48718	8.33333	5.12821	6.41026	7.69231	2.5641	6.41026	5.76923	6.41026	0.641026	3.84615	5.76923	1.92308	7.69231	2.5641	5.12821	5.12821	2.5641	1.92308	156
ENSSSA1UGT001163	4.08163	1.87075	5.27211	6.29252	5.27211	4.93197	2.55102	5.27211	7.65306	11.9048	2.72109	4.7619	2.89116	4.7619	7.14286	11.0544	3.91156	3.91156	1.02041	2.72109	588
ENSSSA1UGT001168	3.55649	3.76569	3.13808	2.92887	8.3682	5.64854	3.13808	7.74059	3.34728	12.1339	1.46444	6.06695	4.39331	2.71967	5.23013	11.0879	4.60251	5.23013	0.83682	4.60251	478
ENSSSA1UGT001169	2.89017	2.89017	1.34875	1.34875	7.89981	3.66089	1.34875	6.93642	7.70713	11.368	3.66089	5.00963	5.58767	7.70713	6.74374	8.67052	5.39499	5.58767	1.34875	2.89017	519
ENSSSA1UGT001173	6.5	1.25	4	5	3.75	5.25	3	4	7	12.75	1.75	4	5.5	4.25	8.75	5.75	3.5	8.5	2.5	3	400
ENSSSA1UGT001177	6.51163	3.25581	1.86047	3.25581	6.97674	3.25581	5.5814	4.65116	6.97674	10.6977	1.39535	3.25581	6.04651	4.65116	4.18605	11.6279	6.04651	6.51163	1.39535	1.86047	215
ENSSSA1UGT001179	4.35897	2.05128	4.35897	3.58974	9.74359	3.07692	1.02564	7.4359	6.15385	14.359	0.512821	7.17949	3.33333	2.5641	4.35897	9.74359	4.61538	5.12821	1.28205	5.12821	390
ENSSSA1UGT001181	5.94855	4.66238	1.76849	2.73312	4.82315	4.82315	1.76849	5.14469	4.34084	9.00322	2.41158	3.37621	5.46624	2.73312	9.32476	14.6302	8.5209	4.01929	1.92926	2.57235	622
ENSSSA1UGT001183	5.31915	3.82979	1.48936	4.68085	8.93617	4.46809	0.851064	10.2128	5.53191	12.5532	2.97872	4.04255	2.76596	2.12766	2.34043	9.3617	4.89362	6.59574	1.48936	5.53191	470
ENSSSA1UGT001185	3.59408	4.43975	3.17125	1.69133	6.76533	4.86258	2.537	8.24524	5.074	11.8393	2.32558	4.22833	4.01691	5.91966	4.65116	9.30233	5.91966	4.22833	2.11416	5.074	473
ENSSSA1UGT001187	7.08899	1.65913	3.61991	6.78733	4.37406	3.16742	2.86576	7.69231	11.3122	10.4072	1.20664	5.12821	5.12821	3.01659	6.78733	6.6365	3.46908	4.82655	1.65913	3.16742	663
ENSSSA1UGT001189	4.73856	2.12418	1.96078	2.94118	6.86275	4.73856	3.26797	5.88235	8.82353	9.80392	2.61438	3.75817	3.59477	2.94118	8.49673	11.4379	7.84314	4.73856	1.96078	1.47059	612
ENSSSA1UGT001190	2.53623	3.07971	2.53623	4.52899	4.71014	4.52899	4.34783	4.8913	5.97826	10.1449	1.99275	4.71014	4.34783	5.43478	12.3188	8.33333	6.88406	4.16667	1.81159	2.71739	552
ENSSSA1UGT001191	5.40541	3.7422	1.4553	4.7817	4.5738	5.40541	2.9106	3.9501	4.5738	9.14761	0.623701	3.7422	4.5738	6.86071	11.0187	11.4345	7.69231	4.3659	1.4553	2.2869	481
ENSSSA1UGT001193	5.34188	3.63248	3.63248	5.76923	9.18803	4.05983	2.77778	4.2735	9.61538	9.18803	2.35043	5.12821	6.83761	1.92308	5.55556	7.90598	5.12821	4.91453	1.28205	1.49573	468
ENSSSA1UGT001194	4.02844	3.08057	3.08057	3.31754	4.50237	3.79147	4.02844	7.109	8.05687	8.76777	0.7109	7.81991	3.5545	9.00474	8.05687	7.81991	4.02844	5.21327	0.947867	3.08057	422
ENSSSA1UGT001195	6.01093	4.37158	5.46448	4.37158	8.19672	3.82514	1.0929	7.65027	7.10383	8.19672	0.546448	8.19672	3.82514	1.63934	4.91803	9.28962	4.37158	6.01093	0.546448	4.37158	183
ENSSSA1UGT001197	4.79532	1.40351	2.10526	3.97661	3.97661	4.21053	3.62573	8.07018	6.43275	9.82456	2.69006	4.09357	6.54971	3.50877	9.7076	9.12281	6.31579	4.67836	1.9883	2.92398	855
ENSSSA1UGT001199	6.44444	3.33333	4.88889	5.77778	4.66667	7.11111	3.33333	6.88889	9.33333	5.33333	1.77778	4.88889	4.88889	2	2.66667	8.66667	6	5.55556	2.22222	4.22222	450
ENSSSA1UGT001201	6.77966	2.17918	4.60048	6.37611	5.73043	3.71267	2.66344	6.94108	5.97256	11.6223	2.25989	5.08475	3.79338	3.30912	5.24617	6.77966	6.21469	7.34463	0.645682	2.74415	1239
ENSSSA1UGT001204	5.76923	3.84615	1.92308	7.69231	13.4615	7.69231	5.76923	5.76923	7.69231	9.61538	0	1.92308	1.92308	5.76923	7.69231	3.84615	1.92308	5.76923	0	1.92308	52
ENSSSA1UGT001205	5.18978	4.02789	1.85902	4.49264	7.0488	3.79551	3.48567	4.5701	5.80945	11.1541	1.23935	3.95043	4.33772	7.12626	7.59101	10.6119	5.11232	4.72502	1.62665	2.24632	1291
ENSSSA1UGT001210	10.7895	2.36842	5.26316	6.31579	6.31579	6.84211	2.36842	6.05263	6.05263	6.57895	2.63158	5.26316	3.42105	2.36842	3.94737	6.84211	5.52632	6.57895	0.789474	3.68421	380
ENSSSA1UGT001211	3.59551	2.47191	2.24719	2.69663	2.92135	6.51685	2.47191	5.8427	4.94382	8.98876	2.69663	4.26966	7.64045	3.37079	8.98876	12.3596	8.98876	6.29213	0.674157	2.02247	445
ENSSSA1UGT001213	8.9153	1.63447	3.12036	4.16048	5.94354	5.94354	2.22883	9.65825	4.30906	10.2526	1.3373	4.16048	4.30906	2.97177	5.05201	8.76672	4.60624	7.28083	1.48588	3.8633	673
ENSSSA1UGT001214	5.5794	1.71674	2.57511	0.858369	12.4464	5.15021	3.86266	3.86266	8.15451	10.3004	3.00429	1.28755	2.57511	4.72103	5.5794	6.43777	5.5794	7.29614	3.43348	5.5794	233
ENSSSA1UGT001215	7.16561	0.477707	4.29936	7.32484	3.18471	5.09554	1.59236	3.98089	7.48408	7.16561	0.955414	3.02548	9.3949	5.25478	5.57325	11.465	6.36943	5.41401	0.477707	4.29936	628
ENSSSA1UGT001216	5.51471	2.94118	5.14706	5.14706	5.14706	4.41176	2.20588	7.72059	4.77941	11.7647	1.83824	6.61765	5.14706	2.57353	4.04412	10.2941	6.61765	5.88235	0.735294	1.47059	272
ENSSSA1UGT001219	2.9382	3.5461	2.53293	3.74873	7.90274	4.35664	3.24215	6.88956	6.28166	10.6383	1.41844	4.55927	4.66059	4.05268	5.57244	11.9554	4.86322	6.07903	1.31712	3.44478	987
ENSSSA1UGT001220	3.3419	3.3419	5.39846	9.2545	4.11311	6.6838	2.57069	3.59897	10.7969	6.16967	1.28535	5.9126	4.62725	3.59897	6.16967	11.8252	4.88432	3.59897	0.514139	2.31362	389
ENSSSA1UGT001222	6.62651	2.40964	3.61446	7.83133	3.01205	4.81928	4.81928	4.81928	9.03614	8.43373	1.80723	5.42169	11.4458	3.01205	3.61446	6.62651	5.42169	4.21687	0.60241	2.40964	166
ENSSSA1UGT001225	11.3821	0	3.25203	4.06504	3.25203	7.31707	1.62602	6.50407	10.5691	6.50407	5.69106	5.69106	5.69106	0.813008	4.87805	12.1951	1.62602	2.43902	0.813008	5.69106	123
ENSSSA1UGT001226	4.06223	3.02506	1.29646	2.8522	7.51945	3.02506	2.16076	6.05013	11.6681	11.236	3.63008	5.01296	4.58081	4.92653	9.16162	7.86517	4.32152	4.8401	0.605013	2.16076	1157
ENSSSA1UGT001227	6.10329	4.10798	1.05634	1.52582	4.22535	2.11268	2.8169	5.16432	7.39437	11.8545	2.69953	2.8169	5.16432	6.69014	7.39437	11.8545	5.75117	5.75117	1.87793	3.6385	852
ENSSSA1UGT001229	5.85443	2.05696	4.27215	7.12025	2.53165	4.58861	1.26582	5.37975	7.43671	8.38608	1.74051	6.32911	6.17089	3.9557	6.32911	11.7089	6.8038	5.22152	0.791139	2.05696	632
ENSSSA1UGT001230	4.69716	6.92213	2.96663	4.94438	4.57355	4.20272	4.82077	5.19159	8.65266	4.57355	0.618047	4.44994	3.33745	5.68603	9.1471	11.6193	4.44994	3.9555	1.3597	3.83189	809
ENSSSA1UGT001231	3.125	1.04167	7.29167	4.16667	8.33333	7.29167	4.16667	5.20833	4.16667	3.125	2.08333	10.4167	6.25	4.16667	5.20833	6.25	7.29167	6.25	3.125	1.04167	96
ENSSSA1UGT001237	7.55814	4.26357	0.581395	1.55039	2.90698	6.39535	0.968992	1.35659	4.26357	6.58915	0.775194	1.74419	12.4031	3.29457	11.4341	21.3178	3.87597	3.10078	4.45736	1.16279	516
ENSSSA1UGT001238	5.91216	0.675676	4.05405	5.06757	6.92568	4.56081	3.88514	6.08108	6.58784	11.1486	2.02703	5.74324	5.57432	3.71622	4.22297	7.26351	3.88514	6.92568	1.35135	4.39189	592
ENSSSA1UGT001239	3.65297	1.36986	7.30594	11.4155	5.47945	0.913242	0.913242	9.13242	8.6758	13.242	2.28311	4.56621	2.73973	3.65297	3.19635	5.47945	5.47945	4.56621	0.913242	5.02283	219
ENSSSA1UGT001240	4.09051	4.09051	2.78503	7.48477	5.48303	4.61271	3.74238	4.35161	5.04787	6.26632	0.522193	4.52567	4.96084	6.44038	10.0957	11.4012	5.57006	5.1349	1.21845	2.17581	1149
ENSSSA1UGT001241	6.95771	3.13779	3.95634	2.45566	4.63847	6.95771	2.72851	5.3206	3.95634	10.7776	2.18281	2.45566	8.04911	2.86494	6.82128	11.869	4.91132	6.13915	1.22783	2.59209	733
ENSSSA1UGT001251	5.96206	1.62602	3.79404	4.60705	5.14905	4.87805	2.71003	7.04607	9.48509	12.1951	1.08401	3.52304	4.60705	3.52304	6.50407	7.31707	5.14905	5.14905	2.16802	3.52304	369
ENSSSA1UGT001254	6.42202	1.37615	4.12844	7.79817	7.33945	4.58716	3.21101	6.42202	7.79817	10.0917	2.29358	4.58716	5.04587	3.21101	3.66972	5.04587	5.9633	5.9633	1.37615	3.66972	218
ENSSSA1UGT001261	4.49251	2.16306	2.32945	2.49584	5.65724	4.49251	2.66223	7.32113	2.66223	9.98336	2.66223	4.82529	4.49251	3.82696	10.3161	11.1481	8.98502	4.6589	1.99667	2.82862	601
ENSSSA1UGT001263	4.31818	3.18182	5	4.54545	6.81818	4.54545	0.909091	7.95455	7.04545	8.63636	2.72727	5.68182	6.59091	3.86364	4.31818	9.77273	4.09091	5.22727	0.909091	3.86364	440
ENSSSA1UGT001269	5.79151	1.1583	5.01931	10.6178	3.28185	6.37066	3.0888	3.28185	5.59846	9.45946	2.3166	4.05405	5.01931	3.861	5.79151	11.0039	4.6332	5.01931	1.1583	3.4749	518
ENSSSA1UGT001271	4.86486	2.52252	5.22523	5.40541	6.66667	3.96396	3.96396	6.66667	6.12613	10.4505	1.8018	3.96396	5.22523	3.6036	6.12613	8.46847	3.42342	7.38739	1.26126	2.88288	555
ENSSSA1UGT001274	8.37438	3.11987	3.94089	4.4335	5.09031	7.06076	1.14943	5.74713	3.77668	11.9869	3.11987	3.28407	4.92611	2.46305	5.41872	7.55337	5.58292	8.21018	1.14943	3.61248	609
ENSSSA1UGT001275	5.11571	3.89769	3.89769	5.60292	5.35932	2.55786	3.41048	6.45554	5.11571	10.2314	2.67966	5.96833	4.26309	6.82095	5.96833	9.0134	5.48112	4.3849	0.487211	3.28867	821
ENSSSA1UGT001279	5.05051	2.6936	3.367	3.7037	7.74411	4.3771	1.3468	8.41751	8.41751	11.4478	2.0202	5.72391	4.7138	3.367	3.0303	6.73401	4.7138	7.07071	1.6835	4.3771	297
ENSSSA1UGT001281	5.21327	6.16114	3.79147	3.31754	2.8436	5.21327	1.4218	4.73934	8.05687	11.3744	3.79147	3.31754	4.2654	4.2654	3.79147	11.3744	6.63507	6.16114	0.947867	3.31754	211
ENSSSA1UGT001283	4.34783	2.48447	4.96894	6.21118	4.96894	4.34783	0	5.59006	10.559	6.8323	1.24224	3.72671	4.34783	1.86335	7.45342	7.45342	6.21118	11.8012	1.24224	4.34783	161
ENSSSA1UGT001287	3.47594	3.20856	3.47594	3.47594	6.68449	2.94118	2.40642	7.48663	5.61497	9.89305	2.40642	4.81283	4.0107	3.74332	8.02139	12.2995	5.08021	6.14973	1.87166	2.94118	374
ENSSSA1UGT001289	4.70588	4.31373	5.4902	5.09804	5.88235	7.05882	4.70588	6.27451	7.05882	6.66667	1.96078	3.52941	5.09804	3.13725	5.4902	9.01961	5.09804	4.70588	1.56863	3.13725	255
ENSSSA1UGT001290	3.50877	3.94737	1.75439	4.82456	5.70175	8.33333	3.07018	6.14035	3.07018	6.14035	0	6.14035	2.19298	3.50877	11.4035	11.8421	3.50877	3.07018	7.01754	4.82456	228
ENSSSA1UGT001291	4.88599	2.9316	4.23453	7.49186	3.58306	5.21173	3.25733	3.90879	3.90879	10.0977	1.30293	4.56026	7.16612	3.90879	5.86319	8.14332	5.53746	8.14332	0.977199	4.88599	307
ENSSSA1UGT001293	10.2837	2.83688	0.886525	0.35461	3.36879	6.20567	1.59574	2.48227	1.77305	4.96454	1.24113	1.41844	11.1702	1.95035	12.4113	21.6312	7.2695	3.01418	3.36879	1.77305	564
ENSSSA1UGT001294	9.24609	1.42248	6.82788	6.54339	3.27169	7.39687	2.56046	4.55192	3.12945	9.81508	2.27596	2.13371	6.82788	3.41394	6.11664	5.6899	5.54765	7.11238	3.55619	2.56046	703
ENSSSA1UGT001296	4.7619	1.19048	4.04762	6.42857	6.66667	3.80952	2.38095	6.90476	8.09524	8.33333	2.38095	3.33333	4.04762	4.52381	5.95238	8.33333	5.71429	6.42857	2.14286	4.52381	420
ENSSSA1UGT001299	5.36723	3.38983	3.24859	6.77966	7.06215	6.63842	3.81356	3.67232	4.9435	6.77966	0.706215	3.24859	4.66102	6.07345	11.7232	8.89831	4.66102	5.64972	1.12994	1.55367	708
ENSSSA1UGT001305	3.4965	1.3986	0	2.0979	4.8951	8.39161	0	4.8951	6.99301	12.5874	2.0979	2.7972	7.69231	0.699301	3.4965	10.4895	11.8881	12.5874	1.3986	2.0979	143
ENSSSA1UGT001309	5.70265	4.48065	2.64766	3.25866	5.49898	4.88798	4.07332	6.72098	5.49898	6.72098	0.814664	4.07332	4.68432	6.31365	10.5906	8.75764	4.68432	4.88798	2.24033	3.46232	491
ENSSSA1UGT001313	4.24837	0.490196	7.67974	4.24837	6.37255	6.37255	2.45098	4.41176	5.06536	8.16993	2.77778	5.55556	5.22876	3.75817	4.73856	6.04575	6.37255	6.69935	3.43137	5.88235	612
ENSSSA1UGT001315	4.99168	4.6589	2.82862	2.91181	7.65391	5.40765	4.90849	4.40932	4.15973	10.8153	1.16473	4.15973	7.15474	4.57571	5.65724	10.1498	5.07488	4.7421	1.16473	3.41098	1202
ENSSSA1UGT001316	3.57583	3.20592	2.46609	5.05549	6.78175	6.04192	2.95931	8.26141	8.26141	9.86436	0.739827	5.17879	4.06905	3.08261	7.76819	8.87793	4.56227	5.17879	1.60296	2.46609	811
ENSSSA1UGT001317	5.29412	3.52941	1.76471	5.29412	6.17647	5	3.82353	3.82353	7.64706	9.70588	2.94118	4.11765	5	3.82353	9.11765	8.82353	4.11765	5.29412	2.64706	2.05882	340
ENSSSA1UGT001321	3.65714	3.42857	2.17143	3.88571	7.65714	4	1.6	6.17143	7.31429	10.4	2.28571	6.51429	3.54286	3.42857	5.82857	9.82857	7.54286	6.17143	1.14286	3.42857	875
ENSSSA1UGT001323	4.7619	3.96825	2.38095	4.7619	3.57143	4.36508	3.1746	5.95238	3.96825	9.12698	2.38095	5.15873	7.14286	2.77778	8.33333	11.1111	7.93651	4.7619	1.98413	2.38095	252
ENSSSA1UGT001324	2.77778	11.1111	1.85185	1.85185	3.7037	4.62963	0.925926	1.85185	2.77778	20.3704	0	0.925926	13.8889	0.925926	16.6667	4.62963	0	11.1111	0	0	108
ENSSSA1UGT001325	9.93377	5.96026	5.96026	5.29801	6.62252	7.28477	1.3245	5.29801	9.27152	5.96026	0.662252	7.94702	0.662252	2.64901	5.29801	4.63576	3.97351	6.62252	1.98675	2.64901	151
ENSSSA1UGT001326	5.91716	4.73373	1.77515	6.50888	8.87574	5.32544	1.18343	8.28402	5.32544	9.46746	2.95858	5.32544	3.5503	2.95858	2.95858	9.46746	7.10059	4.73373	0	3.5503	169
ENSSSA1UGT001327	3.76344	5.51075	2.41935	4.43548	3.49462	4.03226	3.22581	5.10753	7.25806	6.98925	1.07527	3.49462	4.56989	5.91398	9.4086	12.9032	6.58602	5.64516	2.15054	2.01613	744
ENSSSA1UGT001330	2.91971	0.729927	9.48905	3.64964	5.10949	13.1387	2.18978	5.10949	4.37956	7.29927	1.45985	5.83942	2.91971	4.37956	2.18978	8.0292	5.10949	6.56934	1.45985	8.0292	137
ENSSSA1UGT001331	3.79562	2.48175	4.81752	6.86131	3.50365	4.37956	2.91971	5.25547	8.32117	11.3869	1.31387	7.0073	5.25547	4.37956	5.40146	9.05109	4.08759	6.27737	0.729927	2.77372	685
ENSSSA1UGT001332	4.17633	2.32019	2.78422	1.16009	9.74478	4.40835	4.64037	7.19258	5.33643	8.12065	0.928074	4.87239	4.87239	4.40835	9.04872	10.4408	4.87239	6.72854	0.928074	3.01624	431
ENSSSA1UGT001334	4.72441	4.33071	1.1811	5.90551	5.11811	3.54331	2.75591	5.90551	6.29921	12.2047	0.787402	5.11811	3.93701	2.75591	6.29921	11.811	5.90551	6.69291	2.75591	1.9685	254
ENSSSA1UGT001335	8.19022	1.4531	3.30251	5.68032	2.50991	5.81242	2.24571	7.66182	6.07662	12.8137	0.924703	6.07662	7.13342	3.83091	5.81242	4.62351	5.81242	5.81242	1.0568	3.17041	757
ENSSSA1UGT001337	7.66046	1.65631	3.51967	4.55487	4.7619	4.55487	2.07039	5.38302	7.03934	9.52381	1.86335	5.59006	8.48861	4.14079	3.31263	8.69565	7.03934	7.86749	0.207039	2.07039	483
ENSSSA1UGT001339	4.93601	1.64534	6.21572	10.6033	4.02194	4.20475	2.74223	4.02194	7.31261	10.0548	2.3766	4.02194	5.66728	3.83912	5.66728	5.11883	4.93601	6.94698	1.82815	3.83912	547
ENSSSA1UGT001342	3.75	2.5	3.125	3.125	6.25	2.5	1.875	3.75	8.125	13.125	3.125	1.875	6.25	5.625	8.125	9.375	6.25	7.5	1.875	1.875	160
ENSSSA1UGT001343	7.97872	2.65957	2.65957	1.06383	2.65957	5.85106	1.59574	5.85106	3.7234	15.4255	2.12766	4.78723	4.25532	3.7234	2.65957	11.1702	9.04255	6.38298	1.59574	4.78723	188
ENSSSA1UGT001344	5.70652	2.44565	5.16304	6.79348	8.42391	5.16304	2.44565	5.43478	5.16304	9.23913	0.815217	5.43478	3.26087	3.26087	7.6087	6.52174	5.16304	4.8913	1.08696	5.97826	368
ENSSSA1UGT001345	4.41558	0	5.71429	14.8052	2.33766	2.85714	0.779221	5.19481	16.8831	7.53247	0.779221	1.55844	16.1039	2.33766	3.37662	4.67532	4.67532	4.67532	0	1.2987	385
ENSSSA1UGT001347	4.72441	3.14961	5.51181	2.3622	4.72441	8.66142	2.3622	7.87402	10.2362	8.66142	0.787402	4.72441	7.87402	1.5748	1.5748	8.66142	3.14961	7.87402	2.3622	3.14961	127
ENSSSA1UGT001348	6.04317	2.30216	5.32374	4.31655	6.04317	6.18705	3.59712	5.17986	2.73381	10.5036	2.30216	5.17986	4.31655	4.17266	5.32374	8.77698	6.61871	6.90647	1.43885	2.73381	695
ENSSSA1UGT001349	6.28415	1.91257	6.01093	4.64481	2.18579	7.65027	2.18579	8.19672	8.19672	8.74317	1.91257	9.28962	2.45902	1.36612	4.09836	6.28415	6.8306	5.19126	3.82514	2.73224	366
ENSSSA1UGT001351	5.11182	3.83387	1.91693	2.55591	4.15335	3.51438	3.51438	7.34824	4.47284	14.377	2.55591	3.19489	3.83387	6.07029	7.02875	11.1821	6.70927	5.43131	0.958466	2.23642	313
ENSSSA1UGT001353	7.26496	1.92308	1.06838	4.48718	4.48718	5.12821	1.06838	5.55556	7.47863	8.11966	2.13675	3.4188	6.62393	2.77778	9.18803	13.0342	9.82906	2.77778	2.5641	1.06838	468
ENSSSA1UGT001355	4.90112	3.52537	2.32158	2.49355	5.50301	4.72915	2.14961	6.36285	6.62081	9.4583	1.89166	2.83749	4.4712	3.61135	8.42648	12.7257	8.3405	5.24506	1.63371	2.7515	1163
ENSSSA1UGT001363	5.27704	1.58311	4.48549	5.5409	7.38786	5.01319	2.11082	5.5409	2.90237	8.17942	1.31926	5.27704	8.70712	5.01319	4.48549	5.5409	7.91557	5.80475	1.58311	6.33245	379
ENSSSA1UGT001364	6.89655	5.74713	3.44828	5.74713	2.29885	6.89655	4.5977	3.44828	1.14943	6.89655	2.29885	4.5977	8.04598	3.44828	12.6437	12.6437	4.5977	1.14943	0	3.44828	87
ENSSSA1UGT001365	5.10753	2.28495	2.55376	5.91398	3.76344	5.24194	3.36022	5.51075	6.1828	9.67742	2.68817	3.76344	7.12366	3.22581	10.2151	8.06452	5.64516	4.97312	2.01613	2.68817	744
ENSSSA1UGT001367	4.97132	2.67686	3.05927	5.73614	4.58891	3.05927	1.52964	4.58891	5.73614	13.3843	1.72084	4.39771	3.82409	3.44168	5.54493	11.6635	8.2218	7.26577	1.52964	3.05927	523
ENSSSA1UGT001369	5.59441	2.7972	1.04895	3.14685	6.29371	3.4965	2.44755	6.29371	2.0979	16.7832	3.14685	4.54545	4.8951	2.7972	6.99301	5.24476	6.64336	9.09091	2.44755	4.1958	286
ENSSSA1UGT001373	2.92072	2.08623	5.00695	6.11961	7.51043	4.31154	3.47705	7.64951	8.20584	10.2921	2.36439	6.39777	4.03338	3.47705	2.92072	9.87483	4.45063	4.86787	0.973574	3.05981	719
ENSSSA1UGT001374	6.90789	2.63158	6.25	5.26316	4.93421	5.26316	3.61842	2.30263	6.25	6.90789	1.64474	3.94737	9.86842	3.94737	7.56579	9.53947	4.27632	4.27632	1.97368	2.63158	304
ENSSSA1UGT001375	7.77013	0.930797	5.8276	5.34197	5.34197	5.98948	1.983	6.3537	9.75314	9.55079	0.283286	5.22056	3.4399	3.35896	2.67098	9.06516	5.66572	7.12262	0.364225	3.96601	2471
ENSSSA1UGT001377	5.66038	2.35849	6.60377	3.30189	3.77358	13.6792	0.943396	5.18868	5.66038	8.49057	1.41509	2.35849	6.13208	4.24528	9.90566	7.54717	3.30189	4.71698	1.88679	2.83019	212
ENSSSA1UGT001378	5.55556	2.08333	3.93519	3.93519	4.86111	9.25926	3.7037	4.86111	4.16667	6.25	1.38889	4.39815	5.09259	5.09259	8.7963	10.8796	6.71296	4.86111	2.08333	2.08333	432
ENSSSA1UGT001380	7.12946	3.00188	2.25141	4.87805	6.5666	6.00375	1.31332	7.31707	6.37899	10.1313	2.06379	3.00188	4.50281	3.37711	5.81614	6.94184	5.4409	8.25516	1.68856	3.93996	533
ENSSSA1UGT001381	5.94059	2.9703	5.94059	5.94059	5.28053	2.9703	2.31023	4.29043	17.1617	7.92079	2.9703	4.9505	5.94059	2.31023	3.9604	6.60066	3.63036	6.93069	0.330033	1.65017	303
ENSSSA1UGT001382	4.15225	4.49827	1.03806	5.19031	5.53633	3.46021	2.07612	5.19031	6.92042	12.1107	2.76817	5.53633	2.76817	4.49827	5.19031	10.3806	7.26644	6.22837	2.76817	2.42215	289
ENSSSA1UGT001386	5.29661	1.27119	4.66102	6.77966	4.87288	5.72034	2.75424	7.41525	6.5678	8.68644	1.27119	5.50847	2.75424	4.02542	6.35593	9.32203	5.72034	6.5678	0.423729	4.02542	472
ENSSSA1UGT001387	1.92308	4.80769	5.76923	7.69231	5.76923	4.80769	3.84615	4.80769	8.65385	5.76923	2.88462	5.76923	1.92308	2.88462	12.5	3.84615	3.84615	9.61538	0	2.88462	104
ENSSSA1UGT001388	7.21393	1.74129	4.22886	4.47761	3.73134	6.46766	0.995025	2.48756	6.71642	8.95522	2.73632	5.22388	5.72139	6.21891	4.72637	13.1841	7.71144	4.22886	0.746269	2.48756	402
ENSSSA1UGT001390	3.91304	3.04348	7.3913	2.6087	3.91304	7.82609	1.73913	5.65217	6.95652	10	1.73913	6.08696	3.47826	3.91304	7.82609	7.3913	4.34783	8.26087	1.30435	2.6087	230
ENSSSA1UGT001391	2.99786	4.06852	2.99786	4.28266	7.06638	2.35546	1.2848	6.63812	10.0642	10.7066	1.2848	5.56745	4.49679	3.64026	4.92505	9.85011	6.20985	8.56531	1.07066	1.92719	467
ENSSSA1UGT001394	3.84615	3.84615	6.73077	4.80769	10.5769	3.84615	4.80769	8.65385	4.80769	3.84615	1.92308	5.76923	5.76923	2.88462	5.76923	4.80769	5.76923	7.69231	0.961538	2.88462	104
ENSSSA1UGT001395	5.92168	1.05062	4.58453	4.68004	4.96657	4.29799	3.82044	5.34862	6.30372	12.6074	1.52818	3.34288	7.25883	3.53391	5.92168	7.92741	4.87106	7.25883	2.38777	2.38777	1047
ENSSSA1UGT001397	9.4086	2.68817	5.10753	5.37634	5.91398	6.1828	1.07527	6.72043	8.60215	7.7957	1.88172	4.83871	4.83871	1.88172	4.56989	7.52688	4.03226	6.72043	1.34409	3.49462	372
ENSSSA1UGT001400	5.3528	1.94647	1.70316	3.89294	6.08273	1.94647	1.70316	4.86618	8.51582	14.5985	3.64964	4.62287	4.37956	4.86618	7.29927	8.51582	6.08273	5.3528	2.18978	2.43309	411
ENSSSA1UGT001405	7.12468	2.54453	3.30789	6.36132	5.34351	5.08906	3.81679	7.12468	6.61578	8.39695	3.05344	4.3257	5.08906	4.3257	4.83461	4.83461	5.59796	4.83461	1.78117	5.59796	393
ENSSSA1UGT001406	5.27704	1.31926	5.5409	8.70712	6.33245	7.65172	3.16623	8.44327	7.91557	9.23483	1.58311	4.22164	2.37467	2.37467	5.01319	7.65172	3.16623	6.59631	2.11082	1.31926	379
ENSSSA1UGT001407	7.06806	2.22513	4.97382	5.2356	2.74869	9.42408	3.53403	2.6178	1.83246	9.55497	0.78534	1.83246	9.81675	6.41361	12.4346	7.19895	4.05759	5.36649	1.43979	1.43979	764
ENSSSA1UGT001408	5.42636	1.55039	2.32558	5.42636	3.10078	4.65116	0.775194	6.20155	6.20155	7.75194	3.87597	4.65116	11.6279	2.32558	4.65116	9.30233	3.10078	6.97674	2.32558	7.75194	129
ENSSSA1UGT001409	4.53564	1.51188	5.61555	6.69546	3.45572	8.20734	2.80778	6.91145	8.85529	6.04752	2.37581	3.67171	3.02376	6.04752	6.91145	6.91145	3.88769	7.5594	1.94384	3.02376	463
ENSSSA1UGT001410	6.80804	2.56696	4.6875	5.46875	5.80357	4.57589	2.45536	5.58036	4.12946	10.8259	1.89732	3.90625	6.69643	2.79018	6.13839	7.8125	6.91964	7.70089	1.00446	2.23214	896
ENSSSA1UGT001411	4.31655	7.91367	3.59712	6.47482	0.719424	6.47482	3.59712	2.8777	7.91367	3.59712	0.719424	7.19424	5.03597	5.7554	13.6691	10.7914	2.8777	2.8777	0	3.59712	139
ENSSSA1UGT001412	4.7619	2.85714	3.80952	7.61905	6.66667	4.7619	5.71429	4.7619	5.71429	8.57143	2.85714	3.80952	1.90476	2.85714	6.66667	6.66667	6.66667	7.61905	0.952381	4.7619	105
ENSSSA1UGT001415	5.95556	1.68889	4.44444	5.68889	4.8	4.17778	1.68889	9.68889	9.77778	10.6667	1.68889	8.26667	2.48889	4.17778	4.44444	6.57778	4.88889	4.88889	1.15556	2.84444	1125
ENSSSA1UGT001416	5.51876	1.3245	5.73951	6.84327	5.07726	3.75276	2.20751	4.63576	7.94702	9.49227	2.42826	5.73951	6.40177	4.19426	5.29801	4.85651	6.40177	6.40177	1.98675	3.75276	453
ENSSSA1UGT001418	4.28922	2.57353	3.55392	3.79902	6.25	4.04412	1.83824	7.84314	7.35294	8.08824	1.83824	5.7598	4.41176	4.53431	5.7598	8.33333	7.23039	6.25	1.71569	4.53431	816
ENSSSA1UGT001419	5.28	2.4	5.28	5.28	5.6	5.76	2.24	4.64	6.4	10.88	3.68	4.64	4	3.36	6.72	8	3.36	8.48	0.8	3.2	625
ENSSSA1UGT001421	9.26829	1.95122	6.34146	5.85366	5.85366	5.36585	0	7.31707	7.80488	7.31707	1.95122	8.29268	2.43902	4.39024	4.39024	5.85366	5.85366	5.85366	1.46341	2.43902	205
ENSSSA1UGT001427	7.09677	1.84332	5.80645	4.88479	4.97696	6.82028	1.93548	7.09677	7.37327	9.12442	2.21198	5.06912	3.96313	3.7788	4.51613	6.72811	5.43779	7.28111	0.829493	3.22581	1085
ENSSSA1UGT001431	1.28205	11.5385	1.28205	0	0	7.69231	0	1.28205	12.8205	1.28205	0	1.28205	24.359	1.28205	10.2564	12.8205	0	12.8205	0	0	78
ENSSSA1UGT001432	4.37063	3.67133	1.3986	3.84615	4.37063	5.94406	1.92308	5.76923	5.41958	9.26573	2.44755	3.32168	5.24476	2.7972	11.7133	8.21678	10.3147	6.11888	2.27273	1.57343	572
ENSSSA1UGT001436	5.09259	2.22222	6.38889	5.64815	6.01852	3.88889	3.7037	5.92593	7.40741	9.53704	2.40741	5.55556	4.72222	2.77778	6.48148	5.74074	5.37037	5.92593	0.462963	4.72222	1080
ENSSSA1UGT001437	4.7619	1.90476	1.90476	5.71429	4.7619	1.90476	5.71429	5.71429	4.7619	8.57143	1.90476	6.66667	5.71429	2.85714	2.85714	11.4286	6.66667	6.66667	3.80952	5.71429	105
ENSSSA1UGT001441	5.62347	1.71149	9.53545	10.0244	2.20049	2.68949	1.71149	3.66748	8.06846	9.04645	1.22249	5.62347	7.57946	4.15648	7.57946	8.31296	3.91198	5.13447	0.244499	1.95599	409
ENSSSA1UGT001442	3.0303	1.65289	2.75482	5.23416	5.50964	4.95868	3.58127	8.26446	7.43802	10.4683	1.65289	3.85675	5.78512	2.20386	5.23416	9.91736	6.88705	6.33609	1.10193	4.13223	363
ENSSSA1UGT001444	8.84521	1.2285	3.6855	7.49386	2.9484	6.38821	1.2285	7.00246	7.37101	9.33661	2.08845	3.31695	7.37101	3.56265	3.1941	8.84521	5.28256	8.35381	0.859951	1.59705	814
ENSSSA1UGT001448	6.11814	2.32068	2.53165	3.27004	3.37553	4.11392	4.11392	7.173	6.54008	9.59916	2.63713	4.32489	6.01266	5.16878	7.48945	8.33333	6.64557	7.91139	0.843882	1.47679	948
ENSSSA1UGT001449	5.26316	6.31579	3.15789	3.15789	8.42105	1.05263	1.05263	7.36842	6.31579	8.42105	5.26316	3.15789	7.36842	3.15789	3.15789	9.47368	9.47368	6.31579	0	2.10526	95
ENSSSA1UGT001450	1.66205	2.21607	3.04709	2.77008	6.6482	3.04709	1.93906	7.75623	7.47922	14.9584	3.87812	4.43213	4.15512	1.66205	6.6482	8.58726	7.47922	7.47922	1.38504	2.77008	361
ENSSSA1UGT001452	4.68004	2.5788	3.82044	4.29799	7.54537	3.62942	2.19675	8.40497	8.21394	10.4107	1.43266	4.96657	4.10697	3.82044	5.15759	8.59599	4.87106	6.68577	0.859599	3.72493	1047
ENSSSA1UGT001454	6.61269	2.83401	4.18354	6.34278	7.4224	4.72335	3.37382	6.07287	5.66802	10.9312	2.2942	4.18354	4.8583	3.50877	6.07287	6.34278	3.77868	4.8583	1.88934	4.04858	741
ENSSSA1UGT001455	6.33333	4	1.83333	2.66667	6.66667	4.5	2.66667	5.5	5	13.1667	3	3.83333	3.66667	3.16667	7.5	11.8333	5.5	5.33333	2	1.83333	600
ENSSSA1UGT001456	3.07287	2.98507	5.61896	8.60404	5.09219	4.21422	2.10711	7.63828	12.2915	8.51624	1.84372	7.63828	3.07287	2.72169	3.68745	5.00439	3.95083	5.09219	0.877963	5.97015	1139
ENSSSA1UGT001458	4.914	1.4742	6.63391	5.89681	5.65111	4.4226	2.457	6.63391	7.37101	6.38821	2.7027	4.1769	4.1769	3.6855	4.914	5.15971	8.35381	8.59951	1.9656	4.4226	407
ENSSSA1UGT001460	4.34783	3.72671	5.90062	5.2795	3.41615	9.00621	2.17391	3.10559	6.8323	5.2795	0.621118	5.2795	5.59006	3.72671	10.559	10.8696	2.79503	4.34783	3.41615	3.72671	322
ENSSSA1UGT001466	3.2967	2.1978	4.3956	5.76923	4.12088	7.69231	2.47253	9.06593	5.21978	10.989	1.92308	5.21978	4.94505	2.1978	4.94505	7.69231	8.51648	6.04396	0.549451	2.74725	364
ENSSSA1UGT001468	8.61538	2.5641	1.84615	2.15385	2.87179	6.76923	1.84615	4.82051	3.07692	5.84615	1.4359	2.05128	7.69231	2.46154	12	13.4359	13.0256	4.30769	1.94872	1.23077	975
ENSSSA1UGT001469	5.9322	1.69492	5.59322	5.42373	5.25424	5.9322	2.88136	7.9661	5.42373	9.66102	1.69492	3.22034	5.08475	3.72881	6.44068	6.10169	6.10169	7.45763	0.508475	3.89831	590
ENSSSA1UGT001470	2.81457	2.48344	3.31126	3.64238	5.46358	4.4702	3.64238	6.29139	5.7947	11.0927	1.98675	4.13907	3.97351	4.63576	9.93377	10.596	3.97351	6.95364	1.98675	2.81457	604
ENSSSA1UGT001471	5.61497	4.0107	5.61497	6.14973	4.81283	8.55615	2.40642	3.74332	7.21925	5.34759	1.60428	6.14973	5.34759	2.94118	2.6738	8.55615	4.81283	6.68449	2.40642	5.34759	374
ENSSSA1UGT001475	5.69395	4.98221	2.84698	4.27046	5.33808	8.18505	1.42349	8.8968	3.55872	11.3879	4.62633	4.62633	2.13523	3.20285	3.20285	8.18505	3.91459	8.18505	1.77936	3.55872	281
ENSSSA1UGT001476	6.48148	2.77778	5.82011	6.08466	3.57143	7.27513	3.1746	1.85185	4.10053	6.74603	2.1164	3.57143	9.25926	3.83598	8.46561	10.9788	4.2328	6.74603	1.19048	1.71958	756
ENSSSA1UGT001479	4.3573	2.61438	2.39651	5.01089	7.40741	3.92157	2.83224	5.44662	5.66449	13.2898	3.05011	5.01089	6.10022	3.7037	2.61438	10.6754	5.88235	5.66449	0.87146	3.48584	459
ENSSSA1UGT001481	8.16568	1.77515	4.61538	3.31361	3.78698	6.62722	2.01183	5.68047	4.26036	8.28402	2.24852	4.02367	7.10059	3.07692	9.46746	7.92899	6.74556	5.44379	2.01183	3.43195	845
ENSSSA1UGT001482	8.65385	1.60256	5.44872	6.73077	5.76923	7.37179	2.5641	8.97436	8.01282	5.76923	3.20513	5.12821	4.48718	2.5641	3.84615	6.08974	4.48718	7.05128	0.320513	1.92308	312
ENSSSA1UGT001484	4.5977	1.43678	5.74713	5.17241	4.88506	3.44828	2.01149	6.89655	8.33333	8.90805	1.43678	7.18391	3.44828	2.87356	7.75862	6.6092	5.45977	6.32184	2.01149	5.45977	348
ENSSSA1UGT001487	7.69231	0.961538	7.69231	10.5769	5.76923	3.84615	1.92308	3.84615	5.76923	11.5385	0.961538	2.88462	1.92308	2.88462	2.88462	7.69231	5.76923	11.5385	0	3.84615	104
ENSSSA1UGT001488	8.33333	4.86111	9.02778	7.63889	2.77778	5.55556	2.08333	5.55556	9.72222	11.1111	1.38889	5.55556	2.08333	4.16667	2.77778	2.08333	2.77778	9.72222	1.38889	1.38889	144
ENSSSA1UGT001489	5.06667	1.6	6.4	8.8	2.4	6.93333	2.66667	5.86667	12	8.8	1.33333	3.46667	2.66667	5.6	6.66667	5.6	3.2	5.33333	2.13333	3.46667	375
ENSSSA1UGT001490	5.97015	2.23881	4.47761	0.995025	3.23383	7.9602	5.22388	2.48756	2.73632	13.9303	0.248756	2.48756	11.194	4.47761	13.9303	6.71642	3.23383	5.97015	0.746269	1.74129	402
ENSSSA1UGT001492	6.35324	2.66836	3.04956	5.59085	3.43075	10.0381	3.81194	2.79543	4.57433	6.35324	1.65184	3.55781	7.62389	5.33672	14.2313	7.11563	3.81194	5.46379	1.01652	1.52478	787
ENSSSA1UGT001500	4.35835	3.38983	2.90557	3.38983	7.02179	3.99516	3.38983	8.47458	5.44794	7.86925	1.08959	5.32688	6.17433	3.99516	7.02179	10.5327	6.53753	3.99516	1.33172	3.75303	826
ENSSSA1UGT001501	3.10078	1.29199	4.90956	5.94315	4.65116	3.61757	2.32558	6.97674	12.9199	7.75194	2.06718	5.16796	4.39276	1.55039	5.94315	7.49354	6.97674	5.68475	1.55039	5.68475	387
ENSSSA1UGT001506	10.8033	1.66205	4.70914	4.43213	3.60111	4.98615	4.15512	4.15512	7.75623	12.4654	1.93906	7.47922	3.04709	3.87812	3.04709	6.92521	5.26316	6.92521	0.554017	2.21607	361
ENSSSA1UGT001508	2.80899	2.24719	7.30337	5.05618	5.89888	5.33708	1.96629	6.46067	7.86517	10.6742	1.1236	5.61798	3.08989	3.08989	4.77528	7.86517	4.21348	5.61798	2.52809	6.46067	356
ENSSSA1UGT001509	3.18471	0.955414	5.41401	6.05096	5.09554	5.73248	1.91083	6.36943	6.6879	12.1019	1.59236	7.32484	4.14013	3.18471	6.05096	9.23567	4.4586	8.28025	0	2.2293	314
ENSSSA1UGT001512	4.92341	2.62582	2.407	5.25164	5.47046	5.68928	3.50109	6.12691	5.14223	9.62801	1.2035	4.59519	6.56455	5.79869	8.86214	9.95624	4.7046	4.04814	0.875274	2.62582	914
ENSSSA1UGT001515	4.72441	4.40945	3.14961	2.83465	6.14173	4.56693	3.77953	6.92913	6.14173	8.8189	2.67717	4.40945	3.30709	3.46457	7.08661	10.8661	6.14173	4.56693	1.88976	4.09449	635
ENSSSA1UGT001516	5.46218	2.94118	5.88235	7.98319	6.30252	5.04202	1.68067	5.04202	6.30252	8.82353	2.10084	5.46218	4.20168	4.20168	5.46218	10.5042	3.78151	6.72269	0.840336	1.2605	238
ENSSSA1UGT001517	4.32692	2.64423	4.80769	4.32692	6.25	4.32692	0.961538	7.21154	4.56731	13.7019	2.40385	3.84615	3.36538	3.84615	4.32692	10.0962	4.80769	9.375	1.68269	3.125	416
ENSSSA1UGT001520	2.45614	2.80702	4.21053	6.31579	4.21053	4.21053	3.85965	5.26316	3.85965	9.47368	1.05263	4.21053	4.21053	7.7193	9.82456	10.5263	5.96491	3.85965	1.05263	4.91228	285
ENSSSA1UGT001521	7.61905	3.61905	2.85714	4.95238	7.2381	8.19048	1.14286	7.2381	3.2381	10.8571	3.04762	1.71429	4.57143	2.85714	3.80952	6.85714	7.42857	8.38095	2.28571	2.09524	525
ENSSSA1UGT001524	4.54545	5.30303	2.27273	6.06061	6.81818	9.84848	4.54545	3.0303	4.54545	9.84848	1.51515	2.27273	4.54545	3.0303	6.81818	9.84848	5.30303	4.54545	0.757576	4.54545	132
ENSSSA1UGT001525	9.04836	1.71607	4.83619	6.55226	4.83619	4.36817	2.4961	4.68019	5.61622	13.5725	2.4961	6.08424	3.58814	4.21217	6.39626	4.36817	3.74415	6.08424	1.09204	4.21217	641
ENSSSA1UGT001526	5.30303	2.65152	3.0303	4.16667	6.62879	3.0303	2.84091	5.87121	8.14394	11.9318	2.27273	5.30303	3.97727	3.78788	7.38636	7.38636	5.68182	5.49242	0.94697	4.16667	528
ENSSSA1UGT001528	3.9629	3.28836	2.02361	2.78246	5.48061	3.70995	3.28836	8.26307	6.23946	13.7437	3.9629	4.21585	3.20405	4.72175	4.89039	7.9258	6.23946	8.34739	0.84317	2.86678	1186
ENSSSA1UGT001531	5.20833	1.04167	2.60417	8.33333	4.16667	4.16667	2.08333	4.6875	19.7917	7.29167	2.08333	3.64583	4.6875	4.16667	8.85417	2.60417	3.125	6.77083	1.5625	3.125	192
ENSSSA1UGT001534	6.23946	3.54132	4.04722	3.54132	5.73356	7.25126	4.04722	6.23946	3.70995	10.118	1.0118	3.03541	4.89039	5.39629	8.4317	8.76897	3.70995	5.05902	2.36088	2.86678	593
ENSSSA1UGT001536	2.53165	3.79747	2.1097	8.43882	3.79747	3.79747	3.37553	8.01688	9.70464	11.8143	1.68776	6.32911	3.37553	4.21941	4.21941	6.75105	4.64135	4.64135	2.1097	4.64135	237
ENSSSA1UGT001539	4.1791	2.18905	4.47761	5.17413	6.06965	3.68159	3.48259	6.56716	4.87562	14.3284	1.89055	5.37313	4.77612	4.0796	5.27363	8.85572	5.27363	5.27363	0.995025	3.18408	1005
ENSSSA1UGT001540	5.37634	4.03226	3.76344	2.68817	6.72043	7.52688	3.49462	4.56989	6.98925	7.52688	0.537634	2.68817	3.76344	4.30108	9.4086	9.67742	7.52688	4.03226	1.6129	3.76344	372
ENSSSA1UGT001541	4.69083	1.27932	5.11727	6.39659	4.90405	3.62473	1.70576	5.97015	10.8742	10.2345	1.91898	6.60981	2.98507	2.55864	4.26439	6.82303	5.97015	7.03625	1.27932	5.75693	469
ENSSSA1UGT001542	5.70213	2.04255	3.91489	5.87234	2.29787	6.21277	3.48936	3.14894	5.19149	7.65957	1.87234	6.7234	6.89362	3.31915	6.6383	14.0426	5.70213	6.55319	0.851064	1.87234	1175
ENSSSA1UGT001543	3.7551	3.7551	2.04082	2.93878	9.06122	3.83673	2.20408	6.93878	6.53061	12.5714	1.87755	4.08163	4.73469	4	6.53061	10.2857	5.14286	4.89796	1.87755	2.93878	1225
ENSSSA1UGT001547	7.88991	1.65138	4.77064	3.66972	4.0367	8.25688	5.50459	2.56881	4.95413	8.99083	4.22018	3.48624	9.17431	3.48624	8.44037	8.07339	3.30275	5.13761	1.10092	1.2844	545
ENSSSA1UGT001551	4.97592	3.5313	2.24719	1.92616	6.26003	4.01284	1.92616	7.22311	4.97592	12.8411	2.08668	5.13644	4.6549	5.13644	5.13644	10.4334	4.49438	4.81541	2.08668	6.09952	623
ENSSSA1UGT001552	6.41026	4.54545	2.44755	5.94406	5.01166	4.07925	3.2634	5.94406	7.45921	6.99301	0.4662	5.47786	3.37995	6.75991	8.04196	10.2564	5.12821	3.84615	1.6317	2.91375	858
ENSSSA1UGT001555	5.34045	1.86916	3.87183	4.27236	8.01068	4.93992	4.40587	6.27503	6.54206	10.5474	1.06809	3.60481	4.80641	3.87183	7.47664	9.74633	4.13885	5.8745	1.06809	2.26969	749
ENSSSA1UGT001557	5.43634	2.14592	6.15165	8.58369	3.43348	5.15021	2.43205	4.57797	9.01288	9.72818	1.8598	7.01001	3.00429	2.43205	5.43634	7.86838	5.72246	6.00858	1.43062	2.57511	699
ENSSSA1UGT001563	4.21893	3.30673	2.96465	2.7366	4.90308	8.20981	2.85063	5.9293	4.21893	8.43786	1.48233	3.53478	5.70125	2.39453	10.2623	12.0867	6.95553	5.9293	2.05245	1.8244	877
ENSSSA1UGT001564	6.05536	3.11419	4.49827	4.67128	6.57439	5.0173	3.2872	6.40138	4.15225	9.86159	2.24913	4.32526	5.36332	5.53633	6.57439	7.26644	4.32526	6.92042	0.519031	3.2872	578
ENSSSA1UGT001565	4.42478	5.30973	4.42478	2.65487	2.65487	7.07965	8.84956	0.884956	11.5044	7.07965	1.76991	3.53982	5.30973	1.76991	9.73451	7.9646	7.9646	1.76991	1.76991	3.53982	113
ENSSSA1UGT001569	5.56901	4.60048	2.66344	4.11622	7.74818	6.77966	1.69492	4.60048	5.56901	10.4116	1.21065	3.63196	2.90557	4.60048	6.2954	9.4431	3.87409	7.02179	1.69492	5.56901	413
ENSSSA1UGT001573	3.68885	3.36808	2.64635	3.36808	10.7458	3.28789	2.80674	7.53809	7.29751	10.826	2.24539	6.09463	3.60866	3.52847	4.2502	9.22213	4.73136	6.09463	1.0425	3.60866	1247
ENSSSA1UGT001574	6.49351	1.08225	8.87446	7.35931	2.81385	4.329	1.7316	6.06061	7.57576	7.35931	3.67965	6.49351	6.06061	2.38095	2.38095	9.95671	4.7619	6.70996	0.865801	3.0303	462
ENSSSA1UGT001575	4.50581	3.63372	2.61628	3.63372	7.84884	4.06977	3.63372	5.37791	8.13953	11.6279	1.30814	4.94186	2.76163	5.37791	5.9593	9.59302	5.23256	4.79651	1.01744	3.92442	688
ENSSSA1UGT001576	6.18337	0.21322	5.33049	8.742	4.26439	6.18337	1.49254	5.11727	13.0064	10.4478	1.49254	5.97015	3.83795	3.83795	2.98507	4.90405	6.18337	4.47761	0.852878	4.47761	469
ENSSSA1UGT001578	5.27344	1.95312	3.71094	5.01302	3.90625	6.96615	4.23177	5.07812	4.16667	10.8073	1.30208	2.66927	9.50521	4.88281	13.0859	6.25	3.64583	4.81771	0.520833	2.21354	1536
ENSSSA1UGT001579	3.79747	2.02532	5.56962	4.55696	7.59494	5.06329	3.03797	5.56962	3.79747	7.34177	1.01266	5.31646	5.31646	4.05063	6.83544	14.6835	5.06329	5.31646	1.26582	2.78481	395
ENSSSA1UGT001580	5.5794	2.14592	8.15451	6.86695	3.86266	3.86266	2.14592	5.15021	5.5794	9.01288	3.00429	3.86266	7.29614	1.28755	5.15021	5.5794	8.15451	8.15451	1.28755	3.86266	233
ENSSSA1UGT001581	3.67647	0.980392	7.35294	3.43137	5.88235	8.33333	0.735294	6.61765	1.96078	9.31373	0.735294	5.88235	6.12745	2.69608	4.41176	7.35294	9.06863	9.55882	0.735294	5.14706	408
ENSSSA1UGT001582	6.35593	3.38983	5.9322	5.50847	6.35593	3.81356	2.11864	4.23729	10.5932	8.05085	1.27119	4.23729	5.50847	6.35593	7.62712	8.89831	2.54237	3.81356	1.27119	2.11864	236
ENSSSA1UGT001583	4.4733	2.66955	1.8759	2.7417	6.85426	4.54545	2.886	8.51371	6.85426	9.59596	2.1645	4.40115	4.54545	3.4632	7.72006	8.08081	8.29726	4.4733	2.1645	3.67965	1386
ENSSSA1UGT001584	4.74227	1.4433	6.39175	7.21649	3.29897	7.21649	2.8866	6.18557	9.27835	7.21649	2.26804	4.74227	2.8866	5.56701	7.42268	5.7732	3.71134	6.80412	1.64948	3.29897	485
ENSSSA1UGT001585	4.86258	5.28541	3.8055	4.22833	6.13108	2.74841	2.32558	6.76533	7.82241	9.93658	1.05708	3.8055	5.28541	6.13108	4.65116	7.61099	7.18816	6.76533	0.634249	2.95983	473
ENSSSA1UGT001586	5.32258	2.58065	3.87097	4.83871	5	3.87097	2.25806	6.29032	9.35484	11.4516	2.58065	4.03226	5.64516	2.41935	5	9.35484	6.29032	6.29032	0.322581	3.22581	620
ENSSSA1UGT001587	3.57143	10.7143	5.95238	3.57143	5.95238	2.38095	4.7619	8.33333	7.14286	5.95238	1.19048	2.38095	1.19048	2.38095	3.57143	8.33333	8.33333	4.7619	0	9.52381	84
ENSSSA1UGT001591	5.50699	3.23427	2.27273	2.18531	5.85664	4.1958	2.44755	7.25524	5.15734	8.82867	1.92308	3.84615	6.55594	3.4965	9.09091	11.9755	8.21678	4.1958	1.83566	1.92308	1144
ENSSSA1UGT001594	7.25664	1.59292	4.24779	6.0177	3.89381	4.60177	3.53982	5.30973	4.60177	9.38053	2.83186	3.18584	6.54867	2.83186	5.13274	12.2124	5.84071	5.84071	0.530973	4.60177	565
ENSSSA1UGT001596	8.2912	2.02224	5.35895	3.84226	5.15672	5.15672	4.1456	4.44894	4.9545	9.80789	1.11223	2.22447	8.89788	4.85339	7.58342	7.28008	6.06673	5.25784	1.51668	2.02224	989
ENSSSA1UGT001598	4.64481	3.68852	3.14208	4.5082	6.14754	3.55191	3.55191	5.46448	7.10383	11.4754	1.63934	4.91803	6.69399	3.00546	6.96721	10.7923	4.64481	4.23497	0.68306	3.14208	732
ENSSSA1UGT001599	5.95745	2.34043	2.97872	3.61702	5.95745	4.68085	3.40426	3.40426	2.55319	12.5532	0.212766	2.12766	6.59574	5.74468	20.8511	6.17021	1.70213	2.97872	4.46809	1.70213	470
ENSSSA1UGT001600	6.33484	2.48869	4.52489	6.78733	3.84615	4.97738	3.39367	5.20362	6.56109	5.88235	2.71493	5.42986	5.65611	2.71493	5.88235	6.1086	5.42986	6.33484	2.94118	6.78733	442
ENSSSA1UGT001601	9.09091	2.43902	5.32151	6.20843	4.43459	5.32151	1.33038	2.21729	1.99557	9.97783	1.10865	3.32594	10.8647	4.87805	10.1996	7.09534	4.21286	5.32151	1.55211	3.10421	451
ENSSSA1UGT001603	5.92593	3.33333	2.03704	3.51852	3.88889	2.40741	2.59259	5.18519	6.48148	8.51852	1.66667	5.92593	6.66667	3.33333	10.1852	11.4815	6.48148	4.81481	2.22222	3.33333	540
ENSSSA1UGT001607	4.4878	2.92683	3.41463	3.80488	5.36585	4.97561	5.65854	6.34146	3.80488	11.0244	1.65854	4.39024	5.95122	5.17073	10.439	8	4	3.60976	1.07317	3.90244	1025
ENSSSA1UGT001608	5.97243	2.75651	8.26953	6.58499	3.52221	4.59418	1.37825	6.58499	6.58499	10.5666	1.37825	6.27871	2.90965	4.44104	2.45023	9.95406	3.82848	7.81011	0.765697	3.36907	653
ENSSSA1UGT001609	5.38302	4.34783	1.24224	4.7619	4.55487	5.17598	3.93375	6.62526	6.00414	7.03934	0.828157	4.96894	6.41822	5.7971	8.28157	11.8012	3.72671	4.34783	1.65631	3.10559	483
ENSSSA1UGT001612	4.98575	3.60874	2.37417	4.89079	7.69231	4.8433	3.56125	5.88794	7.16999	8.78443	0.949668	4.03609	3.1339	4.74834	8.78443	10.6838	4.51092	4.32099	1.61443	3.4188	2106
ENSSSA1UGT001615	4.78589	2.51889	5.79345	9.3199	3.27456	7.30479	1.25945	5.79345	11.5869	9.82368	1.51134	3.27456	2.51889	4.28212	6.29723	5.54156	4.03023	5.54156	1.76322	3.77834	397
ENSSSA1UGT001617	4.76974	4.27632	2.30263	3.94737	6.90789	5.09868	4.27632	6.74342	4.93421	9.86842	0.657895	4.11184	5.26316	4.27632	10.3618	8.22368	5.26316	5.26316	1.31579	2.13816	608
ENSSSA1UGT001618	2.32558	1.16279	10.4651	10.4651	5.81395	4.65116	1.16279	13.9535	12.7907	10.4651	2.32558	4.65116	4.65116	1.16279	2.32558	5.81395	1.16279	4.65116	0	0	86
ENSSSA1UGT001619	3.4965	2.44755	4.1958	5.24476	4.1958	9.09091	2.7972	5.59441	8.04196	6.99301	0.699301	8.04196	3.14685	3.84615	6.64336	7.69231	5.24476	6.64336	2.7972	3.14685	286
ENSSSA1UGT001621	5.85586	3.9039	3.3033	3.3033	6.30631	4.05405	2.1021	7.20721	5.10511	7.80781	3.3033	3.6036	4.05405	2.7027	8.10811	9.15916	5.55556	7.95796	1.95195	4.65465	666
ENSSSA1UGT001622	3.82166	1.59236	6.05096	7.00637	6.6879	6.6879	2.86624	4.77707	5.41401	9.87261	2.86624	6.36943	4.77707	2.86624	5.73248	7.00637	3.82166	4.77707	2.2293	4.77707	314
ENSSSA1UGT001623	7.14286	0	5	12.1429	4.28571	4.28571	1.42857	4.28571	10	5	1.42857	5	5	4.28571	5.71429	10	7.14286	5.71429	0	2.14286	140
ENSSSA1UGT001626	3.8835	4.85437	5.82524	5.82524	4.85437	3.8835	3.8835	5.82524	7.76699	3.8835	1.94175	4.85437	4.85437	3.8835	13.5922	4.85437	3.8835	8.73786	0	2.91262	103
ENSSSA1UGT001627	5.79882	4.02367	2.48521	5.32544	7.45562	5.08876	4.73373	4.26036	3.90533	9.46746	0.946746	3.07692	5.79882	4.61538	10.5325	8.28402	5.68047	5.32544	1.06509	2.13018	845
ENSSSA1UGT001628	5.82524	1.94175	6.79612	3.8835	2.91262	7.76699	0	2.91262	3.8835	6.79612	0.970874	6.79612	3.8835	5.82524	3.8835	21.3592	8.73786	1.94175	2.91262	0.970874	103
ENSSSA1UGT001630	4.51694	3.26223	1.75659	3.01129	6.64994	5.01882	1.25471	5.5207	6.77541	9.15935	1.75659	3.51317	5.14429	3.26223	9.66123	12.798	8.15558	4.64241	2.00753	2.133	797
ENSSSA1UGT001632	5.28967	3.27456	3.77834	8.31234	5.79345	5.03778	1.51134	7.30479	6.80101	9.82368	3.77834	2.77078	5.28967	4.28212	5.28967	7.30479	5.28967	5.28967	1.00756	2.77078	397
ENSSSA1UGT001633	2.98507	2.48756	5.47264	8.95522	4.97512	3.48259	2.73632	8.20896	9.95025	5.97015	1.74129	7.9602	3.9801	4.97512	3.23383	4.72637	6.21891	6.46766	0.248756	5.22388	402
ENSSSA1UGT001635	5.45455	4.05594	3.21678	3.35664	8.11189	3.4965	3.21678	6.15385	4.8951	9.51049	1.25874	5.73427	4.33566	5.31469	8.11189	9.65035	4.33566	4.75524	2.0979	2.93706	715
ENSSSA1UGT001636	13.1579	1.31579	3.94737	2.63158	1.31579	5.26316	1.31579	9.21053	0	14.4737	5.26316	5.26316	2.63158	2.63158	3.94737	6.57895	5.26316	10.5263	3.94737	1.31579	76
ENSSSA1UGT001637	7.37527	1.51844	6.07375	5.42299	4.98915	5.20607	1.51844	5.63991	6.94143	7.80911	2.1692	5.85683	4.12148	2.60304	7.15835	7.80911	5.42299	5.85683	1.73536	4.77223	461
ENSSSA1UGT001638	16.0083	2.079	1.6632	3.1185	6.44491	3.7422	3.1185	4.9896	3.7422	5.61331	1.6632	2.4948	14.9688	3.9501	4.158	8.31601	3.7422	7.48441	0.4158	2.2869	481
ENSSSA1UGT001639	2.77778	0.925926	4.62963	7.40741	4.16667	2.77778	3.7037	5.09259	3.24074	18.0556	2.31481	9.72222	4.16667	3.24074	3.7037	10.1852	5.09259	6.01852	0.462963	2.31481	216
ENSSSA1UGT001640	3.89972	2.78552	5.29248	5.29248	5.01393	6.12813	2.78552	4.73538	7.24234	11.9777	1.67131	5.29248	3.06407	5.01393	6.68524	7.79944	3.06407	6.96379	0.278552	5.01393	359
ENSSSA1UGT001641	5.17241	1.72414	4.88506	7.75862	3.44828	2.58621	1.14943	6.6092	16.954	8.33333	2.58621	3.73563	6.32184	4.5977	4.88506	5.74713	3.73563	6.32184	1.14943	2.29885	348
ENSSSA1UGT001642	5.6553	2.06463	6.82226	4.5781	4.66786	3.94973	1.79533	5.29623	8.79713	8.97666	1.52603	7.18133	5.6553	5.20646	6.82226	5.20646	4.75763	5.9246	0.897666	4.21903	1114
ENSSSA1UGT001644	7.67635	3.3195	4.14938	5.39419	2.28216	9.75104	4.97925	3.73444	2.6971	9.54357	0.829876	2.07469	9.3361	3.73444	9.3361	7.67635	4.77178	5.18672	2.07469	1.45228	482
ENSSSA1UGT001646	4.61538	3.4188	4.78632	5.12821	6.49573	7.00855	3.07692	5.98291	9.05983	7.35043	1.19658	5.81197	4.10256	3.4188	3.07692	6.83761	5.12821	6.15385	2.73504	4.61538	585
ENSSSA1UGT001651	8.4507	2.43278	4.73752	6.78617	4.35339	4.9936	2.30474	7.04225	7.17029	9.09091	1.40845	4.35339	3.71319	4.22535	5.50576	8.4507	4.9936	5.6338	0.768246	3.58515	781
ENSSSA1UGT001652	3.66226	3.05188	4.47609	3.4588	6.00203	4.88301	4.98474	5.79858	4.06918	8.34181	2.03459	4.98474	5.59512	4.57782	9.3591	8.24008	7.73143	4.37436	1.11902	3.25534	983
ENSSSA1UGT001654	7.10383	1.0929	10.3825	6.01093	2.73224	5.46448	1.63934	2.73224	9.83607	8.19672	2.18579	6.01093	4.91803	2.18579	3.82514	7.10383	3.27869	9.28962	3.27869	2.73224	183
ENSSSA1UGT001655	5.78704	2.5463	3.47222	5.78704	6.25	8.10185	2.77778	5.78704	6.48148	9.02778	1.15741	5.09259	4.39815	3.24074	5.78704	8.33333	6.48148	4.62963	0.925926	3.93519	432
ENSSSA1UGT001663	4.2292	2.04638	1.36426	1.90996	5.18417	4.2292	1.90996	5.18417	5.3206	7.50341	1.77353	2.18281	7.23056	2.18281	10.6412	17.7353	11.4598	3.68349	2.59209	1.63711	733
ENSSSA1UGT001664	4.65116	3.10078	4.65116	3.10078	5.42636	8.52713	2.32558	5.42636	10.0775	10.8527	0.775194	4.65116	7.75194	1.55039	2.32558	9.30233	3.10078	6.97674	1.55039	3.87597	129
ENSSSA1UGT001665	4.85075	1.1194	5.97015	5.97015	5.22388	7.46269	4.10448	5.97015	4.47761	11.194	0.746269	8.58209	4.85075	4.47761	5.22388	2.61194	4.47761	5.97015	2.61194	4.10448	268
ENSSSA1UGT001666	14.3636	1.81818	4.18182	8	2.90909	5.63636	2.18182	2.36364	3.45455	6	0.727273	3.45455	13.8182	4.36364	3.81818	7.45455	4	8.18182	0.181818	3.09091	550
ENSSSA1UGT001668	6.20301	2.63158	3.38346	3.94737	10.3383	4.13534	2.44361	6.01504	6.20301	9.3985	1.12782	8.27068	1.69173	2.63158	6.57895	10.1504	6.20301	4.69925	1.12782	2.81955	532
ENSSSA1UGT001672	2.83286	3.68272	2.83286	5.38244	7.93201	3.96601	3.68272	6.79887	6.23229	9.63173	0.566572	3.11615	6.51558	4.81586	12.4646	7.36544	3.39943	4.24929	1.69972	2.83286	353
ENSSSA1UGT001675	5.02793	1.39665	3.91061	3.07263	6.42458	8.10056	7.26257	7.82123	3.91061	12.2905	3.07263	3.35196	2.7933	3.63128	2.23464	10.0559	2.51397	7.5419	1.39665	4.18994	358
ENSSSA1UGT001676	7.01754	3.11891	3.31384	3.7037	5.26316	6.82261	3.11891	7.60234	5.65302	7.79727	0.974659	5.26316	3.50877	4.2885	9.74659	9.16179	5.45809	4.67836	0.779727	2.72904	513
ENSSSA1UGT001677	5.96491	1.40351	3.15789	1.75439	4.5614	2.80702	4.5614	5.61404	5.61404	7.36842	1.75439	5.26316	4.91228	2.80702	8.07018	17.8947	8.07018	4.21053	1.40351	2.80702	285
ENSSSA1UGT001678	2.86976	4.63576	2.42826	4.63576	5.96026	4.19426	3.75276	5.07726	7.06402	9.05077	1.3245	3.97351	4.41501	5.51876	9.05077	11.2583	4.85651	3.53201	1.54525	4.85651	453
ENSSSA1UGT001679	4.99109	0.713012	1.78253	4.81283	4.81283	23.8859	30.1248	2.13904	4.81283	4.09982	0.178253	2.13904	0.178253	1.42602	1.60428	7.30838	1.78253	2.6738	0.178253	0.356506	561
ENSSSA1UGT001680	5.68182	2.72727	3.86364	3.18182	5.90909	3.86364	2.72727	8.18182	7.27273	11.5909	3.86364	4.77273	4.54545	3.63636	2.72727	10.9091	3.86364	7.5	0.681818	2.5	440
ENSSSA1UGT001681	2.41935	1.6129	3.22581	5.64516	9.67742	6.45161	5.64516	9.67742	7.25806	8.87097	0.806452	5.64516	4.03226	3.22581	4.03226	4.03226	6.45161	8.87097	1.6129	0.806452	124
ENSSSA1UGT001683	6.86528	3.36788	0.777202	1.5544	2.46114	6.86528	1.29534	1.1658	1.94301	5.05181	0.906736	2.07254	9.19689	2.72021	13.8601	19.9482	13.7306	2.33161	2.72021	1.1658	772
ENSSSA1UGT001685	3.83387	0.319489	5.11182	14.6965	1.59744	2.8754	0.319489	4.47284	16.6134	7.02875	1.27796	1.91693	16.2939	2.55591	4.47284	5.43131	5.11182	4.79233	0	1.27796	313
ENSSSA1UGT001686	4.98442	3.11526	5.919	7.47664	5.60748	4.04984	0.934579	7.78816	9.34579	10.5919	0.934579	4.6729	3.11526	3.11526	5.919	8.09969	4.6729	5.919	0.934579	2.80374	321
ENSSSA1UGT001688	5.12821	2.5641	4.8433	8.54701	6.83761	3.1339	1.7094	6.26781	11.9658	9.40171	1.7094	5.69801	2.2792	3.4188	3.9886	6.26781	5.12821	7.12251	0.2849	3.7037	351
ENSSSA1UGT001693	2.32558	1.16279	10.4651	10.4651	5.81395	4.65116	1.16279	13.9535	12.7907	10.4651	2.32558	4.65116	4.65116	1.16279	2.32558	5.81395	1.16279	4.65116	0	0	86
ENSSSA1UGT001699	2.89331	3.07414	2.35081	6.50995	10.1266	3.4358	2.16998	10.6691	7.77577	12.2966	0.904159	3.9783	3.4358	2.89331	5.78662	9.40325	2.89331	6.87161	0.361664	2.16998	553
ENSSSA1UGT001700	4.64169	3.50163	2.76873	4.72313	6.35179	5.21173	3.01303	7.32899	7.32899	8.38762	1.05863	4.80456	3.1759	5.86319	7.32899	10.6678	4.96743	5.13029	1.2215	2.52443	1228
ENSSSA1UGT001701	9.89305	2.13904	2.13904	5.88235	4.54545	4.81283	1.06952	4.81283	8.82353	5.08021	1.3369	10.1604	5.61497	6.41711	2.6738	8.82353	6.41711	5.61497	2.13904	1.60428	374
ENSSSA1UGT001703	7.7381	1.78571	7.44048	6.54762	2.67857	2.97619	3.86905	6.54762	7.7381	10.7143	1.19048	3.57143	6.54762	2.67857	3.57143	9.82143	6.54762	4.16667	1.78571	2.08333	336
ENSSSA1UGT001706	3.57143	3.1746	2.18254	3.37302	3.1746	5.35714	2.57937	9.52381	7.14286	13.6905	2.38095	3.76984	4.56349	3.57143	5.35714	10.3175	4.96032	7.14286	1.98413	2.18254	504
ENSSSA1UGT001707	6.84932	9.58904	6.84932	4.10959	4.10959	8.21918	2.73973	6.84932	8.21918	5.47945	4.10959	1.36986	4.10959	2.73973	5.47945	4.10959	2.73973	6.84932	2.73973	2.73973	73
ENSSSA1UGT001708	6.01504	4.69925	1.50376	1.12782	6.01504	6.20301	3.38346	5.6391	5.45113	8.83459	2.63158	3.57143	5.6391	1.50376	7.89474	10.7143	9.02256	4.51128	3.19549	2.44361	532
ENSSSA1UGT001710	7.90816	2.29592	4.33673	3.95408	4.20918	7.52551	4.84694	3.44388	2.67857	10.2041	0.510204	2.04082	8.67347	4.08163	12.2449	8.54592	2.93367	6.25	1.14796	2.16837	784
ENSSSA1UGT001714	4.038	2.85036	4.75059	4.15677	6.29454	4.3943	3.08789	7.12589	8.19477	10.6888	1.66271	6.65083	3.20665	4.27553	5.81948	7.48219	3.56295	7.12589	0.712589	3.91924	842
ENSSSA1UGT001715	5.35844	6.22737	2.60681	3.1861	6.08255	5.28602	3.54815	4.85156	4.63432	8.03765	1.08617	5.1412	3.62056	5.1412	8.39971	12.9616	3.54815	5.06879	2.5344	2.67922	1381
ENSSSA1UGT001719	4.54545	5.08021	1.87166	2.94118	4.0107	6.14973	2.6738	6.41711	3.47594	12.0321	1.60428	4.0107	6.95187	1.60428	9.62567	12.5668	6.14973	4.54545	2.13904	1.60428	374
ENSSSA1UGT001720	2.19298	0.219298	5.70175	14.9123	1.97368	5.04386	0.877193	5.70175	15.7895	7.01754	0.438596	1.97368	11.4035	2.85088	4.38596	6.57895	3.94737	7.23684	0.219298	1.53509	456
ENSSSA1UGT001722	6.8323	0.621118	3.10559	9.93789	3.72671	4.96894	3.72671	10.559	7.45342	5.59006	3.10559	4.96894	4.34783	4.34783	5.59006	6.21118	4.34783	6.21118	0.621118	3.72671	161
ENSSSA1UGT001724	4.92611	4.4335	3.44828	7.88177	1.47783	6.89655	2.46305	4.92611	9.85222	9.35961	0.985222	4.92611	1.97044	5.41872	10.8374	7.38916	5.41872	4.4335	0.492611	2.46305	203
ENSSSA1UGT001726	3.22086	2.60736	2.45399	3.68098	5.21472	4.29448	2.14724	6.59509	5.06135	9.96933	3.37423	3.83436	4.44785	4.7546	8.58896	9.5092	11.1963	4.60123	1.99387	2.45399	652
ENSSSA1UGT001731	6.03645	4.32802	3.07517	4.10023	4.32802	6.15034	4.10023	3.75854	5.69476	8.54214	1.13895	3.41686	6.15034	3.87244	11.8451	8.88383	4.55581	6.03645	1.70843	2.2779	878
ENSSSA1UGT001732	7.25624	3.62812	4.53515	9.07029	4.53515	4.53515	2.49433	4.7619	9.97732	6.57596	3.1746	2.04082	3.62812	3.40136	4.98866	8.84354	6.57596	5.21542	0.907029	3.85488	441
ENSSSA1UGT001733	4.18574	2.8777	6.86723	10.8568	2.09287	3.79333	3.27011	3.33551	7.25965	6.21321	0.981033	6.86723	5.8208	3.98954	1.50425	17.4624	5.23218	5.29758	0.784827	1.30804	1529
ENSSSA1UGT001734	3.51852	2.77778	1.11111	3.7037	5.92593	2.96296	2.96296	8.14815	8.51852	12.2222	4.81481	3.7037	3.88889	4.62963	5.74074	11.4815	3.88889	5.74074	1.66667	2.59259	540
ENSSSA1UGT001735	4.91803	3.27869	2.45902	3.27869	7.37705	6.55738	2.45902	9.83607	1.63934	9.01639	1.63934	4.91803	4.91803	2.45902	6.55738	6.55738	4.91803	10.6557	0	6.55738	122
ENSSSA1UGT001737	6.42202	1.14679	5.73394	6.42202	3.66972	7.33945	2.06422	5.73394	6.19266	6.88073	3.44037	3.66972	4.58716	4.81651	3.66972	8.94495	5.73394	7.79817	1.37615	4.3578	436
ENSSSA1UGT001739	3.64146	3.36134	2.80112	2.80112	10.3641	2.80112	4.20168	8.96359	4.7619	14.5658	2.2409	5.88235	4.48179	3.64146	1.96078	7.56303	3.36134	6.16246	1.68067	4.7619	357
ENSSSA1UGT001740	2.62136	3.30097	1.65049	3.00971	9.12621	3.20388	2.81553	7.57282	9.41748	13.1068	3.59223	3.8835	4.17476	4.36893	5.63107	7.28155	6.31068	5.63107	1.35922	1.94175	1030
ENSSSA1UGT001742	3.9557	5.37975	2.21519	3.48101	7.43671	3.00633	1.89873	7.27848	7.91139	13.6076	2.05696	5.22152	3.79747	4.11392	5.37975	9.49367	3.9557	4.90506	1.26582	3.63924	632
ENSSSA1UGT001743	6.46552	3.87931	3.53448	5.68966	4.91379	10.0862	3.36207	3.18966	5.86207	6.03448	1.12069	3.7931	4.82759	4.74138	9.74138	8.10345	4.65517	5	2.32759	2.67241	1160
ENSSSA1UGT001744	4.35644	4.75248	1.9802	4.9505	6.53465	3.9604	2.9703	4.75248	4.35644	8.71287	2.17822	4.35644	3.76238	4.75248	8.71287	11.8812	4.75248	6.53465	2.77228	2.9703	505
ENSSSA1UGT001745	6.51429	2.28571	4.11429	4.45714	5.25714	5.94286	3.65714	7.42857	5.25714	7.88571	1.14286	4.34286	4.91429	4.8	8.57143	7.88571	5.94286	6.05714	1.6	1.94286	875
ENSSSA1UGT001746	4.75483	1.3373	5.34918	4.01189	6.24071	5.79495	1.78306	7.13224	9.21248	11.1441	1.18871	5.20059	4.75483	1.78306	4.75483	6.53789	5.20059	7.42942	1.04012	5.34918	673
ENSSSA1UGT001747	7.52212	2.30088	5.22124	6.81416	6.54867	5.75221	2.30088	5.39823	7.78761	12.1239	1.76991	6.0177	2.92035	2.65487	3.71681	8.40708	4.51327	5.48673	0.973451	1.76991	1130
ENSSSA1UGT001748	11.068	1.16505	3.30097	5.24272	1.94175	12.233	5.24272	2.52427	2.52427	8.73786	0	2.3301	13.3981	6.60194	12.8155	4.46602	2.3301	2.91262	0.582524	0.582524	515
ENSSSA1UGT001750	8.88889	3.88889	4.44444	4.86111	2.91667	7.91667	3.19444	3.33333	3.47222	7.63889	0.277778	2.5	7.5	5	14.0278	8.19444	2.77778	6.11111	1.11111	1.94444	720
ENSSSA1UGT001751	5.87755	2.77551	1.46939	4.97959	6.28571	4.16327	3.18367	5.46939	8.73469	10.6122	2.12245	3.18367	5.06122	5.55102	7.5102	9.22449	6.44898	4.40816	1.30612	1.63265	1225
ENSSSA1UGT001752	2.61097	1.04439	6.26632	8.09399	4.43864	4.17755	2.34987	7.04961	7.3107	12.2715	2.34987	6.00522	3.13316	2.61097	5.22193	10.1828	4.69974	7.8329	0.261097	2.08877	383
ENSSSA1UGT001757	8.15451	2.28898	5.5794	8.01144	4.57797	7.58226	2.43205	4.72103	6.72389	12.0172	1.57368	4.43491	3.14735	2.57511	4.57797	6.86695	4.00572	5.29328	1.57368	3.86266	699
ENSSSA1UGT001759	5.25526	5.25526	2.7027	3.75375	6.45646	4.2042	2.7027	4.95495	7.50751	8.55856	1.35135	3.3033	3.75375	5.25526	8.10811	10.6607	5.40541	5.25526	2.1021	3.45345	666
ENSSSA1UGT001760	3.5343	3.1185	3.1185	2.9106	7.48441	5.61331	1.6632	9.14761	9.14761	9.56341	1.6632	3.5343	3.9501	4.5738	4.7817	8.52391	6.86071	4.158	2.2869	4.3659	481
ENSSSA1UGT001767	7.17241	1.51724	4.55172	6.89655	5.51724	5.65517	2.2069	4.82759	8.27586	7.17241	1.24138	4.27586	7.17241	4.41379	5.10345	8.68966	5.93103	5.7931	0.551724	3.03448	725
ENSSSA1UGT001768	2.88739	3.07988	1.05871	3.84986	7.98845	2.40616	2.98364	8.0847	7.31473	13.4745	3.46487	6.35226	2.6949	4.52358	3.9461	10.2984	5.77478	5.19731	1.05871	3.56112	1039
ENSSSA1UGT001769	5.03704	2.37037	3.7037	4.59259	4.74074	6.96296	5.03704	5.48148	4	9.18519	1.48148	4.44444	9.48148	3.11111	10.2222	8.74074	3.40741	5.48148	0.740741	1.77778	675
ENSSSA1UGT001771	4.09357	4.82456	8.33333	5.55556	4.82456	3.80117	3.07018	4.97076	8.77193	7.16374	2.04678	5.84795	4.82456	3.50877	5.40936	9.35673	4.53216	4.82456	1.02339	3.21637	684
ENSSSA1UGT001774	6.93642	2.89017	4.04624	3.46821	3.46821	4.62428	2.31214	4.62428	5.78035	9.24855	1.7341	2.89017	5.78035	4.62428	7.51445	11.5607	9.24855	7.51445	1.15607	0.578035	173
ENSSSA1UGT001776	3.33333	3.0303	1.51515	3.93939	6.06061	4.54545	1.81818	7.57576	7.57576	12.7273	3.0303	5.45455	4.54545	3.0303	3.63636	10.9091	7.57576	6.06061	1.51515	2.12121	330
ENSSSA1UGT001777	1.46413	6.58858	0.878477	4.83163	7.17423	3.07467	11.5666	6.58858	7.32064	6.58858	2.19619	2.34261	4.39239	1.75695	8.19912	16.1054	6.14934	1.31772	0	1.46413	683
ENSSSA1UGT001778	6.68524	3.06407	3.34262	6.40669	5.57103	3.76045	2.92479	5.01393	8.6351	9.88858	2.22841	2.92479	4.31755	3.06407	5.71031	9.33148	6.26741	5.98886	0.696379	4.17827	718
ENSSSA1UGT001779	4.91803	3.27869	7.21311	4.59016	3.93443	6.22951	1.31148	5.90164	6.88525	9.18033	2.29508	5.2459	2.62295	3.60656	7.86885	8.19672	4.91803	6.88525	1.31148	3.60656	305
ENSSSA1UGT001780	5.41872	3.07882	2.0936	3.07882	5.04926	6.52709	4.4335	4.06404	4.80296	9.60591	0.492611	3.32512	6.65025	6.03448	12.1921	9.60591	2.70936	8.37438	1.10837	1.35468	812
ENSSSA1UGT001782	2.82486	2.82486	2.25989	5.64972	6.21469	7.34463	2.82486	9.60452	6.77966	3.38983	3.38983	2.82486	2.25989	6.77966	7.9096	10.7345	6.21469	5.08475	1.69492	3.38983	177
ENSSSA1UGT001785	3.91304	1.73913	3.47826	5.21739	3.91304	2.17391	3.47826	6.08696	6.95652	10.4348	2.17391	5.65217	3.47826	5.21739	8.69565	10.8696	3.91304	5.21739	1.30435	6.08696	230
ENSSSA1UGT001786	6.41711	1.28342	4.38503	3.85027	6.31016	6.63102	3.20856	4.38503	2.35294	11.6578	1.71123	4.81283	6.63102	2.6738	5.45455	9.83957	6.09626	7.37968	1.06952	3.85027	935
ENSSSA1UGT001788	5.03401	3.12925	6.66667	6.39456	5.98639	5.03401	2.31293	5.30612	6.66667	10.6122	1.36054	4.62585	5.57823	2.31293	4.89796	8.97959	4.35374	6.80272	0.816327	3.12925	735
ENSSSA1UGT001789	4.65839	2.17391	4.96894	5.59006	4.65839	6.8323	1.86335	4.96894	4.65839	11.4907	3.10559	4.96894	2.48447	4.65839	6.52174	8.38509	7.45342	8.38509	0.621118	1.5528	322
ENSSSA1UGT001791	2.26415	4.33962	2.26415	3.77358	7.73585	3.77358	2.83019	7.35849	7.16981	8.11321	0.754717	4.90566	4.90566	4.33962	8.11321	10.3774	6.03774	6.03774	1.69811	3.20755	530
ENSSSA1UGT001794	5.16987	5.02216	4.43131	6.79468	5.02216	3.98818	5.90842	3.39734	8.4195	10.4874	2.06795	5.613	3.98818	3.98818	5.02216	10.4874	4.57903	4.57903	0.14771	0.886263	677
ENSSSA1UGT001795	6.07375	2.1692	5.09761	5.63991	4.77223	4.55531	2.92842	6.39913	6.94143	10.0868	1.73536	4.66377	4.12148	3.47072	3.90456	9.76139	5.09761	6.39913	2.1692	4.01302	922
ENSSSA1UGT001797	6.72098	1.62933	4.68432	9.16497	4.07332	4.88798	3.66599	7.33198	7.33198	10.1833	1.01833	6.31365	3.46232	4.07332	6.92464	5.29532	3.86965	4.68432	1.222	3.46232	491
ENSSSA1UGT001798	5.65724	2.32945	4.49251	6.98835	6.98835	4.82529	2.16306	6.65557	7.65391	10.8153	0.831947	4.6589	5.82363	3.66057	3.32779	7.32113	4.6589	7.32113	0.665557	3.1614	601
ENSSSA1UGT001800	5.1199	1.36099	4.01815	5.24951	4.53662	3.88853	3.43487	3.95334	3.75891	8.29553	1.81465	4.47181	9.13804	9.33247	5.96241	11.6008	6.22165	4.407	0.324044	3.11082	1543
ENSSSA1UGT001801	5.64374	2.82187	3.35097	4.05644	6.70194	5.99647	3.35097	7.23104	8.28924	8.64198	2.46914	4.58554	4.93827	2.6455	6.34921	9.87654	3.88007	5.29101	1.23457	2.6455	567
ENSSSA1UGT001803	4.11255	1.08225	3.67965	6.49351	5.62771	3.67965	2.5974	6.70996	7.14286	10.8225	2.81385	8.00866	4.54545	2.81385	4.97835	8.00866	5.41126	6.70996	1.51515	3.24675	462
ENSSSA1UGT001804	5.64166	2.78983	2.04588	3.16181	3.03782	5.26968	2.60384	6.32362	5.82765	9.9194	2.97582	4.27774	4.9597	5.33168	7.56355	9.42343	8.61748	6.75759	2.23187	1.23993	1613
ENSSSA1UGT001805	3.29154	3.29154	3.1348	4.54545	8.93417	4.70219	4.07524	5.64263	4.38871	10.3448	1.41066	5.17241	3.76176	2.82132	11.9122	8.77743	4.38871	4.38871	0.783699	4.23197	638
ENSSSA1UGT001806	1.68067	1.68067	2.52101	1.68067	8.40336	4.20168	8.40336	2.52101	5.88235	11.7647	3.36134	0.840336	10.084	4.20168	0.840336	22.6891	0.840336	5.88235	1.68067	0.840336	119
ENSSSA1UGT001807	7.07804	1.27042	3.62976	4.71869	3.62976	6.1706	2.90381	6.53358	4.90018	12.1597	2.17786	4.17423	4.35572	2.54083	5.08167	10.5263	5.44465	9.07441	0.725953	2.90381	551
ENSSSA1UGT001808	3.37756	2.17129	4.70446	5.66948	6.6345	3.86007	3.61882	8.56454	7.35826	9.52955	1.68878	6.39324	4.10133	3.25694	2.6538	10.1327	4.70446	6.27262	1.08565	4.22195	829
ENSSSA1UGT001809	3.58362	2.73038	3.41297	3.58362	5.6314	4.60751	3.75427	5.80205	5.9727	9.04437	1.53584	4.60751	3.58362	2.73038	7.33788	11.7747	7.84983	4.94881	5.2901	2.21843	586
ENSSSA1UGT001810	5.4	1.4	0.8	5	5.4	2.2	4.2	7.2	8.2	11	1.8	5	6.6	4	6.2	10	7.6	5.8	0.8	1.4	500
ENSSSA1UGT001811	5.30786	3.39703	3.60934	5.09554	7.431	7.21868	4.03397	3.39703	5.9448	9.97877	1.27389	5.09554	4.4586	3.18471	9.55414	5.9448	4.88323	4.88323	1.4862	3.82166	471
ENSSSA1UGT001812	1.93798	3.48837	2.32558	2.90698	7.94574	4.45736	2.71318	6.00775	7.75194	10.4651	1.16279	7.17054	5.42636	4.06977	7.75194	8.72093	4.84496	5.62016	1.93798	3.29457	516
ENSSSA1UGT001813	7.14286	2.5641	4.0293	4.57875	6.04396	5.67766	2.38095	6.41026	5.31136	9.89011	2.1978	4.3956	6.95971	2.38095	4.21245	8.05861	7.14286	5.31136	1.64835	3.663	546
ENSSSA1UGT001815	5.28846	2.16346	5.76923	5.04808	2.16346	12.5	1.44231	6.00962	5.28846	8.17308	2.64423	3.36538	10.3365	4.08654	4.56731	7.93269	5.52885	4.32692	0.721154	2.64423	416
ENSSSA1UGT001816	6.17829	3.97176	5.29568	5.4722	3.00088	7.50221	3.8835	6.53133	5.56046	10.0618	2.38305	4.85437	3.44219	3.70697	5.11915	7.23742	4.94263	7.23742	1.05914	2.55958	1133
ENSSSA1UGT001817	5.97285	2.98643	3.43891	3.71041	5.97285	6.06335	2.80543	5.15837	5.06787	10.7692	1.62896	4.97738	6.69683	2.89593	7.78281	8.77828	4.88688	6.33484	1.35747	2.71493	1105
ENSSSA1UGT001819	7.32394	1.40845	5.07042	6.76056	5.35211	9.85915	3.09859	6.47887	7.60563	10.4225	2.25352	5.35211	2.25352	1.12676	3.94366	8.16901	4.22535	3.66197	0.56338	5.07042	355
ENSSSA1UGT001821	4.60993	3.19149	5.31915	6.56028	5.85106	3.5461	3.01418	5.85106	10.1064	8.68794	1.77305	4.96454	3.01418	3.36879	5.85106	9.75177	5.14184	5.31915	0.531915	3.5461	564
ENSSSA1UGT001822	2.95858	2.95858	3.35306	4.53649	8.48126	3.35306	2.95858	7.69231	8.6785	12.0316	1.97239	4.33925	2.76134	3.74753	5.32544	6.90335	6.31164	5.71992	1.18343	4.73373	507
ENSSSA1UGT001824	3.42466	6.16438	1.59817	3.19635	7.53425	2.28311	3.65297	5.47945	5.47945	8.90411	1.59817	3.42466	3.19635	3.88128	7.99087	15.0685	5.70776	4.56621	4.10959	2.73973	438
ENSSSA1UGT001825	6.89655	3.06513	2.49042	3.63985	5.17241	5.17241	3.06513	5.17241	4.02299	7.66284	2.10728	7.08812	8.04598	2.87356	8.23755	10.3448	4.98084	5.74713	0.574713	3.63985	522
ENSSSA1UGT001826	4.33962	5.09434	2.45283	1.88679	4.15094	5.09434	1.69811	6.41509	9.0566	12.2642	3.77358	4.33962	3.39623	5.09434	4.5283	9.62264	6.41509	6.98113	1.88679	1.50943	530
ENSSSA1UGT001827	4.63526	1.97568	3.87538	7.06687	5.09119	2.73556	3.03951	7.37082	6.45897	12.8419	2.43161	5.24316	3.64742	5.77508	4.86322	10.0304	4.40729	5.54711	0.683891	2.27964	1316
ENSSSA1UGT001831	3.6075	2.3088	4.6176	5.33911	7.50361	4.4733	2.3088	8.51371	6.63781	9.81241	3.1746	5.19481	5.91631	3.3189	7.21501	6.63781	4.6176	5.33911	1.0101	2.4531	693
ENSSSA1UGT001833	3.93401	3.5533	1.52284	2.91878	7.99492	3.5533	4.18782	6.9797	6.09137	12.3096	2.28426	2.91878	4.31472	4.06091	5.83756	9.64467	5.20305	6.9797	2.28426	3.4264	788
ENSSSA1UGT001834	1.83983	3.57143	1.40693	2.92208	7.03463	2.38095	2.05628	10.3896	7.35931	14.2857	4.54545	4.22078	3.13853	4.87013	4.7619	9.19913	6.49351	5.08658	1.2987	3.13853	924
ENSSSA1UGT001837	5.93692	1.66976	4.82375	4.45269	6.49351	5.75139	2.96846	8.34879	3.8961	12.616	3.71058	4.26716	3.15399	2.5974	4.08163	6.86456	5.19481	5.75139	2.78293	4.63822	539
ENSSSA1UGT001838	5.66038	1.25786	5.97484	7.2327	5.03145	4.40252	3.45912	5.03145	8.49057	7.2327	2.20126	5.03145	5.97484	4.08805	5.34591	5.34591	7.2327	5.97484	1.57233	3.45912	318
ENSSSA1UGT001839	5.71859	3.00978	2.63356	3.68698	4.81565	5.04138	2.0316	4.66516	4.58992	6.47103	0.978179	3.08503	6.54628	2.40783	12.7916	13.6945	9.48081	4.81565	1.80587	1.73062	1329
ENSSSA1UGT001841	3.25581	4.18605	0.930233	1.86047	9.76744	1.39535	2.7907	2.7907	9.30233	13.4884	2.32558	4.65116	3.25581	3.72093	6.04651	13.0233	6.51163	7.44186	0.465116	2.7907	215
ENSSSA1UGT001843	3.23915	3.30806	1.5162	2.61888	6.1337	2.96347	2.61888	5.99586	7.78773	11.8539	2.6878	6.82288	3.79049	4.204	7.09855	11.5782	6.40937	4.9621	2.06754	2.34321	1451
ENSSSA1UGT001847	4.31373	1.17647	4.31373	8.23529	7.05882	3.92157	1.56863	7.45098	5.88235	11.7647	3.52941	4.31373	3.92157	3.52941	4.31373	10.1961	3.92157	7.05882	0.392157	3.13725	255
ENSSSA1UGT001849	5.61798	5.61798	3.37079	6.74157	7.86517	2.24719	1.1236	1.1236	11.236	12.3596	5.61798	8.98876	0	7.86517	4.49438	6.74157	3.37079	3.37079	0	2.24719	89
ENSSSA1UGT001850	8.72302	0.629496	5.30576	6.56475	2.42806	6.56475	2.06835	3.50719	5.1259	8.45324	2.06835	4.13669	10.7914	4.22662	6.38489	12.9496	4.67626	3.23741	0.44964	1.70863	1112
ENSSSA1UGT001852	5.92334	3.48432	2.09059	4.18118	5.22648	4.18118	2.78746	5.57491	3.48432	9.7561	1.0453	5.22648	4.18118	4.52962	11.1498	11.4983	3.13589	6.96864	2.78746	2.78746	287
ENSSSA1UGT001855	4.5098	0.980392	3.33333	6.47059	5.88235	5.68627	1.76471	5.68627	6.47059	12.7451	2.94118	4.31373	3.92157	4.5098	4.70588	8.03922	5.4902	6.86275	1.96078	3.72549	510
ENSSSA1UGT001857	5.63991	2.60304	5.20607	3.90456	4.55531	8.89371	1.30152	5.20607	6.72451	7.15835	3.03688	4.98915	4.12148	4.77223	3.68764	8.24295	5.42299	6.07375	2.38612	6.07375	461
ENSSSA1UGT001859	4.97126	0.932111	5.40625	5.59267	6.36943	4.1945	2.03511	5.40625	6.68013	10.9523	2.05064	7.19279	3.0915	3.85273	2.99829	12.0553	5.48392	5.94998	1.103	3.68184	6437
ENSSSA1UGT001861	7.87037	0.925926	5.70988	6.6358	3.85802	9.10494	3.24074	7.56173	6.32716	7.56173	1.69753	4.62963	4.78395	3.54938	4.93827	5.70988	4.93827	7.40741	0.771605	2.77778	648
ENSSSA1UGT001864	7.31949	2.96736	2.96736	3.85757	6.52819	5.93472	2.76954	7.22057	6.23145	9.69337	2.07715	4.64886	4.05539	2.86845	5.93472	7.81405	5.04451	6.6271	1.6815	3.75865	1011
ENSSSA1UGT001865	3.08008	1.43737	4.10678	5.33881	6.16016	4.92813	2.6694	5.33881	8.41889	9.65092	3.08008	6.57084	3.90144	2.87474	4.31211	7.18686	5.95483	7.3922	1.84805	5.74949	487
ENSSSA1UGT001870	3.63636	8.18182	2.72727	6.36364	6.36364	1.81818	3.63636	4.54545	6.36364	11.8182	1.81818	3.63636	5.45455	6.36364	6.36364	6.36364	3.63636	6.36364	1.81818	2.72727	110
ENSSSA1UGT001879	6.15385	3.26923	5.96154	6.92308	3.55769	5.48077	2.5	6.05769	8.26923	7.69231	2.40385	3.94231	4.03846	4.13462	6.92308	6.63462	4.42308	7.11538	1.05769	3.46154	1040
ENSSSA1UGT001884	4.55764	7.5067	1.07239	5.09383	5.63003	2.68097	10.1877	3.21716	10.7239	7.5067	2.94906	2.41287	4.82574	1.34048	6.97051	12.8686	6.70241	3.21716	0	0.536193	373
ENSSSA1UGT001887	2.44648	2.59939	1.98777	2.75229	8.25688	3.66972	1.52905	8.10398	8.25688	13.7615	3.51682	4.12844	3.82263	3.36391	7.03364	10.3976	5.8104	4.89297	2.29358	1.37615	654
ENSSSA1UGT001889	3.1746	1.98413	3.57143	4.36508	7.93651	5.15873	5.15873	5.95238	5.55556	8.33333	0.396825	2.77778	1.98413	1.98413	15.0794	10.7143	6.74603	4.36508	1.5873	3.1746	252
ENSSSA1UGT001891	4.36893	1.94175	4.69256	5.66343	5.17799	4.85437	3.23625	5.50162	8.41424	8.41424	1.2945	4.69256	4.69256	3.55987	4.36893	10.6796	6.95793	6.95793	1.61812	2.91262	618
ENSSSA1UGT001895	3.8961	6.23377	2.33766	3.63636	7.01299	4.15584	4.67532	7.27273	7.53247	8.83117	1.03896	4.15584	2.5974	4.15584	9.61039	9.35065	4.93506	4.67532	1.2987	2.5974	385
ENSSSA1UGT001897	9.3361	1.03734	5.18672	13.278	3.11203	5.80913	0.414938	4.14938	7.88382	5.60166	2.28216	5.60166	4.14938	4.56432	2.6971	10.7884	4.14938	7.05394	1.45228	1.45228	482
ENSSSA1UGT001898	4.02597	1.2987	3.11688	3.11688	4.15584	3.7013	1.75325	3.50649	3.7013	9.67532	3.11688	5.64935	12.4026	11.4286	3.11688	13.5714	4.61039	5.32468	0.194805	2.53247	1540
ENSSSA1UGT001900	6.96517	1.99005	2.48756	2.98507	5.47264	6.46766	2.48756	6.46766	7.9602	10.4478	2.98507	4.47761	3.9801	3.9801	2.98507	5.97015	6.96517	9.45274	2.48756	2.98507	201
ENSSSA1UGT001902	18.1818	0	5.05051	3.0303	3.0303	8.08081	2.0202	6.06061	3.0303	4.0404	1.0101	3.0303	9.09091	6.06061	3.0303	5.05051	5.05051	7.07071	0	8.08081	99
ENSSSA1UGT001904	4.79204	2.44123	5.60579	8.86076	6.41953	3.07414	1.7179	5.6962	13.5624	8.40868	1.7179	3.52622	4.61121	2.07957	3.70705	10.4882	3.9783	6.05787	0.542495	2.71248	1106
ENSSSA1UGT001907	4.66102	6.35593	2.64831	3.38983	5.9322	6.25	3.07203	4.13136	3.91949	8.79237	1.16525	3.38983	4.76695	4.97881	10.1695	12.2881	4.76695	4.87288	2.22458	2.22458	944
ENSSSA1UGT001909	3.3101	1.91638	2.96167	6.09756	6.09756	5.74913	2.43902	7.83972	6.27178	13.5889	1.91638	4.3554	5.74913	4.18118	5.22648	5.92334	6.44599	5.74913	0.522648	3.65854	574
ENSSSA1UGT001911	1.88679	0	1.88679	7.54717	3.77358	9.43396	0	15.0943	7.54717	11.3208	1.88679	1.88679	1.88679	0	11.3208	9.43396	7.54717	1.88679	0	5.66038	53
ENSSSA1UGT001913	4.19355	3.3871	4.51613	4.67742	5.32258	7.41935	3.06452	3.87097	6.12903	7.09677	2.41935	4.67742	7.09677	2.58065	6.93548	9.67742	5.48387	4.83871	2.41935	4.19355	620
ENSSSA1UGT001914	4.58167	3.38645	3.38645	3.98406	7.17131	2.78884	1.79283	7.56972	5.37849	12.749	1.79283	4.98008	3.18725	3.38645	5.77689	11.1554	4.58167	6.97211	1.19522	4.18327	502
ENSSSA1UGT001915	4.0404	5.72391	2.6936	4.7138	7.07071	2.3569	1.6835	4.7138	5.05051	9.42761	0.3367	3.0303	5.38721	5.38721	7.40741	12.7946	6.73401	4.3771	2.6936	4.3771	297
ENSSSA1UGT001916	7.88732	4.50704	7.32394	3.09859	3.09859	8.4507	3.09859	5.35211	3.09859	7.32394	3.38028	4.22535	3.38028	2.53521	6.19718	9.29577	7.60563	5.07042	2.53521	2.53521	355
ENSSSA1UGT001918	5.78339	2.41851	2.62881	3.99579	7.15037	5.78339	1.68244	7.57098	4.73186	10.9359	2.31335	4.83701	3.89064	2.62881	5.88854	7.99159	6.204	6.62461	1.9979	4.94217	951
ENSSSA1UGT001920	3.06513	4.98084	3.44828	4.21456	6.51341	3.06513	2.68199	8.81226	6.51341	11.4943	3.44828	3.83142	4.98084	3.44828	4.5977	9.57854	4.98084	5.36398	0.766284	4.21456	261
ENSSSA1UGT001922	2.83843	5.45852	2.83843	2.83843	5.45852	4.58515	6.33188	5.24017	7.86026	12.2271	1.0917	2.83843	3.27511	5.02183	6.76856	10.262	3.49345	3.27511	5.45852	2.83843	458
ENSSSA1UGT001923	5.38674	3.03867	2.48619	3.45304	3.59116	5.66298	3.45304	5.52486	5.24862	11.6022	1.51934	3.31492	4.83425	3.72928	8.01105	10.7735	7.87293	5.38674	1.9337	3.1768	724
ENSSSA1UGT001924	8.72483	3.3557	2.68456	8.05369	5.36913	3.3557	3.3557	8.05369	6.71141	11.4094	0.671141	4.02685	3.3557	2.68456	7.38255	6.04027	2.68456	5.36913	0.671141	6.04027	149
ENSSSA1UGT001927	5.6338	1.40845	7.04225	7.04225	7.04225	1.40845	1.40845	5.6338	9.85915	15.493	4.22535	2.8169	2.8169	7.04225	1.40845	4.22535	5.6338	4.22535	2.8169	2.8169	71
ENSSSA1UGT001930	5	3.78788	1.9697	2.42424	1.36364	8.48485	2.87879	3.0303	2.42424	4.39394	5.60606	16.2121	10	1.81818	3.78788	16.6667	3.48485	2.87879	1.81818	1.9697	660
ENSSSA1UGT001932	6.14828	2.71248	5.60579	4.33996	7.9566	4.15913	2.35081	3.9783	6.32911	10.4882	1.62749	5.24412	3.9783	3.79747	3.79747	11.7541	4.33996	7.59494	1.26582	2.53165	553
ENSSSA1UGT001936	6.99588	3.29218	3.7037	3.7037	4.93827	4.52675	0.823045	4.93827	6.99588	12.7572	2.88066	4.52675	6.17284	2.88066	2.88066	11.9342	5.76132	5.76132	0	4.52675	243
ENSSSA1UGT001941	5.88235	5.88235	0	2.35294	2.35294	7.05882	5.88235	5.88235	4.70588	12.9412	4.70588	5.88235	2.35294	0	10.5882	8.23529	4.70588	7.05882	1.17647	2.35294	85
ENSSSA1UGT001942	4.22222	4.22222	2.44444	4	7.11111	4	2.66667	7.11111	7.77778	9.77778	2	5.33333	4.22222	4.22222	5.77778	11.5556	4.44444	4.88889	1.77778	2.44444	450
ENSSSA1UGT001946	2.32945	3.82696	1.83028	4.6589	5.49085	1.66389	4.49251	6.15641	8.81864	12.9784	2.66223	4.32612	3.99334	5.99002	5.65724	8.48586	5.49085	4.32612	1.99667	4.82529	601
ENSSSA1UGT001947	4.0404	4.79798	2.77778	3.91414	2.77778	7.95455	5.68182	5.05051	3.15657	6.31313	0.631313	3.91414	5.42929	6.06061	16.9192	8.4596	4.16667	3.40909	2.65152	1.89394	792
ENSSSA1UGT001951	6.11247	2.32274	4.64548	5.86797	3.05623	6.47922	2.32274	4.03423	4.64548	10.7579	0.977995	5.01222	7.94621	3.17848	6.47922	10.7579	5.50122	6.47922	1.34474	2.07824	818
ENSSSA1UGT001954	3.87722	1.61551	3.71567	5.33118	8.5622	3.23102	1.13086	7.75444	7.10824	11.4701	2.26171	6.30048	2.58481	3.39257	6.13893	7.26979	6.13893	6.46204	0.969305	4.68498	619
ENSSSA1UGT001955	4.05405	3.51351	4.86486	6.48649	5.40541	5.40541	3.24324	4.05405	10	10.8108	1.35135	6.75676	2.7027	3.24324	4.86486	10.5405	4.32432	5.13514	1.35135	1.89189	370
ENSSSA1UGT001956	7.00935	3.42679	2.33645	1.86916	4.82866	4.98442	1.86916	4.20561	3.11526	8.41121	1.55763	2.64798	8.72274	2.80374	10.9034	16.8224	7.32087	3.58255	2.49221	1.09034	642
ENSSSA1UGT001960	7.30769	1.92308	5.38462	6.53846	5.38462	8.07692	3.46154	6.15385	7.69231	8.84615	4.23077	3.07692	4.23077	1.53846	6.92308	4.61538	5.76923	4.23077	1.15385	3.46154	260
ENSSSA1UGT001961	9.67742	2.6393	1.46628	2.6393	3.22581	4.69208	5.8651	3.51906	0.293255	9.38416	0	1.75953	12.0235	3.81232	18.7683	8.21114	2.05279	6.15836	1.46628	2.34604	341
ENSSSA1UGT001962	6.75513	2.6538	1.68878	3.49819	2.53317	6.99638	1.3269	3.73945	2.41255	6.39324	0.723764	2.77443	8.80579	3.01568	15.3197	17.3703	9.40893	2.29192	0.965018	1.3269	829
ENSSSA1UGT001963	5.46875	2.34375	7.03125	6.25	7.8125	2.34375	3.125	8.59375	14.0625	12.5	1.5625	3.125	3.90625	3.90625	1.5625	3.90625	3.125	4.6875	0	4.6875	128
ENSSSA1UGT001967	4.50387	2.04082	3.16678	3.51865	9.00774	4.50387	2.18156	7.74103	5.77058	13.019	2.11119	5.27797	3.65939	3.16678	3.80014	9.14849	5.13723	6.61506	1.8297	3.80014	1421
ENSSSA1UGT001968	4.16125	1.82055	2.3407	4.03121	4.16125	4.16125	2.3407	4.29129	7.28218	10.9233	2.60078	5.3316	5.20156	3.64109	9.36281	11.1834	6.50195	5.98179	2.21066	2.47074	769
ENSSSA1UGT001970	2.58621	1.72414	6.89655	6.03448	5.17241	5.17241	2.58621	6.89655	10.3448	11.2069	4.31034	8.62069	6.03448	4.31034	2.58621	5.17241	3.44828	6.03448	0	0.862069	116
ENSSSA1UGT001972	5.91631	4.4733	3.0303	4.4733	5.05051	6.63781	3.8961	4.329	5.33911	8.51371	1.2987	4.329	4.6176	4.7619	8.22511	8.80231	6.49351	5.05051	2.4531	2.3088	693
ENSSSA1UGT001973	6.1086	5.88235	6.33484	8.82353	7.01357	4.29864	4.29864	6.78733	7.23982	6.78733	2.71493	3.61991	3.39367	1.13122	6.1086	6.56109	3.39367	4.52489	1.80995	3.16742	442
ENSSSA1UGT001974	7.44048	4.26587	7.14286	5.55556	1.5873	8.13492	4.16667	4.7619	5.85317	9.02778	2.08333	4.6627	4.06746	4.6627	5.55556	5.95238	4.46429	7.93651	1.28968	1.38889	1008
ENSSSA1UGT001976	5.89971	1.17994	7.9646	3.53982	6.48968	7.37463	0.884956	3.53982	2.0649	8.55457	0.589971	4.12979	5.60472	2.94985	5.30973	8.25959	6.48968	12.6844	0.294985	6.19469	339
ENSSSA1UGT001977	5.11628	3.56589	3.33333	4.8062	3.72093	4.72868	5.5814	5.50388	3.95349	10.4651	0.852713	3.17829	7.36434	4.49612	12.4031	8.06202	3.64341	6.43411	0.775194	2.0155	1290
ENSSSA1UGT001978	4.88889	2.22222	2.22222	4	2.66667	3.11111	4.44444	4.44444	9.33333	12.4444	2.22222	4	4.88889	4.44444	8.44444	10.6667	9.33333	2.22222	0.888889	3.11111	225
ENSSSA1UGT001989	4.6875	0.46875	8.90625	5.15625	4.84375	3.125	0.78125	5.46875	5.3125	6.40625	3.28125	5.78125	15.1562	2.96875	5.46875	10.4688	5.15625	4.21875	0.78125	1.5625	640
ENSSSA1UGT001990	5.60399	2.11706	4.10959	5.10585	5.85305	4.48319	2.86426	8.34371	5.97758	11.0834	1.74346	5.23039	4.48319	3.23786	6.72478	6.72478	5.23039	6.47572	1.36986	3.23786	803
ENSSSA1UGT001993	5.31335	3.20163	3.0654	3.74659	5.31335	6.94823	4.29155	4.49591	4.15531	9.05995	0.749319	4.01907	4.56403	4.22343	11.6485	11.1035	5.38147	4.83651	1.3624	2.52044	1468
ENSSSA1UGT001996	4.58716	3.89908	4.12844	4.81651	9.63303	4.3578	1.6055	7.33945	6.88073	10.5505	1.83486	5.61927	2.63761	3.09633	6.30734	9.74771	4.01376	5.16055	0.573394	3.21101	872
ENSSSA1UGT001997	3.3101	2.43902	3.83275	3.83275	7.66551	4.87805	4.3554	4.87805	5.22648	7.31707	1.56794	3.48432	6.62021	3.48432	10.8014	10.1045	5.22648	5.92334	1.0453	4.00697	574
ENSSSA1UGT001998	3.64583	2.60417	3.125	1.04167	9.375	4.16667	4.16667	5.72917	5.72917	4.16667	1.5625	15.1042	4.6875	6.25	4.16667	5.20833	9.375	5.72917	1.5625	2.60417	192
ENSSSA1UGT001999	3.31288	2.82209	2.45399	3.55828	8.22086	4.90798	4.66258	7.48466	4.66258	11.6564	1.71779	3.43558	4.29448	4.66258	8.46626	9.93865	3.92638	4.53988	1.71779	3.55828	815
ENSSSA1UGT002000	9.09091	0	4.54545	1.2987	1.2987	12.3377	2.5974	7.79221	2.5974	8.44156	1.94805	1.2987	7.79221	3.24675	5.19481	5.19481	9.09091	11.6883	0.649351	3.8961	154
ENSSSA1UGT002001	3.17241	5.51724	2.89655	3.44828	6.06897	4	3.44828	6.62069	4.96552	9.10345	1.10345	4.27586	4.13793	4.96552	8.55172	11.8621	5.93103	4.41379	2.62069	2.89655	725
ENSSSA1UGT002002	3.44828	6.89655	4.13793	6.2069	5.51724	0.689655	0.689655	8.96552	8.27586	5.51724	1.37931	8.96552	3.44828	5.51724	8.27586	3.44828	2.75862	9.65517	0	6.2069	145
ENSSSA1UGT002003	6.28518	2.81426	4.03377	5.06567	7.69231	4.12758	2.72045	4.87805	5.90994	12.3827	2.90807	4.12758	4.22139	3.56473	4.69043	9.19325	4.50281	6.5666	0.750469	3.56473	1066
ENSSSA1UGT002005	10.0271	2.57453	3.38753	3.65854	3.92954	6.50407	3.79404	2.43902	3.79404	10.2981	0.948509	3.25203	12.1951	7.18157	8.80759	6.36856	2.57453	5.28455	0.542005	2.43902	738
ENSSSA1UGT002006	6.32911	2.05696	3.32278	5.6962	5.53797	5.37975	2.37342	6.32911	7.91139	11.2342	2.8481	3.79747	6.01266	3.63924	5.85443	7.43671	4.90506	4.11392	1.42405	3.79747	632
ENSSSA1UGT002011	9.36768	1.40515	6.32319	6.79157	4.68384	8.8993	1.17096	5.15222	8.8993	9.83607	2.10773	3.74707	3.98126	1.87354	2.57611	7.72834	5.15222	7.25995	1.17096	1.87354	427
ENSSSA1UGT002013	7.85714	2.85714	2.14286	2.14286	7.85714	1.42857	2.14286	5.71429	8.57143	11.4286	2.14286	4.28571	5.71429	2.85714	8.57143	7.85714	4.28571	6.42857	1.42857	4.28571	140
ENSSSA1UGT002014	3.84615	1.60256	5.12821	7.05128	6.41026	3.20513	3.20513	6.41026	7.05128	10.5769	2.5641	6.08974	5.12821	2.88462	5.44872	7.37179	4.80769	6.08974	1.60256	3.52564	312
ENSSSA1UGT002016	6.2603	2.14168	4.28336	4.11862	2.80066	3.62438	3.78913	6.2603	8.23723	11.5321	1.81219	5.76606	5.60132	3.45964	5.27183	9.71993	5.10708	5.60132	0.823723	3.78913	607
ENSSSA1UGT002018	3.9501	2.7027	2.9106	1.2474	8.73181	4.3659	2.9106	7.27651	6.44491	12.474	3.7422	4.7817	3.3264	4.9896	3.9501	6.65281	5.19751	6.44491	2.079	5.82121	481
ENSSSA1UGT002020	5.48303	3.26371	6.00522	5.48303	5.09138	4.047	3.26371	7.70235	4.69974	12.6632	2.08877	3.39426	5.09138	4.17755	7.04961	8.74674	4.17755	5.09138	0.522193	1.95822	766
ENSSSA1UGT002021	5.84416	1.2987	2.5974	4.54545	5.19481	5.84416	2.5974	7.79221	3.24675	11.039	1.94805	6.49351	5.19481	3.8961	4.54545	5.19481	9.74026	6.49351	1.2987	5.19481	154
ENSSSA1UGT002022	3.44311	2.09581	3.59281	2.24551	7.48503	3.59281	2.54491	5.83832	6.28743	7.03593	1.94611	12.1257	5.53892	5.68862	6.73653	8.83234	6.88623	4.49102	0.449102	3.14371	668
ENSSSA1UGT002023	5.74597	2.52016	4.13306	5.04032	5.14113	4.33468	2.01613	5.44355	9.47581	10.1815	2.52016	5.84677	5.54435	3.02419	4.53629	11.4919	4.03226	5.84677	0.806452	2.31855	992
ENSSSA1UGT002026	7.57801	3.71471	2.37741	1.78306	2.67459	7.42942	1.48588	3.71471	3.26895	5.94354	1.04012	2.37741	5.49777	2.67459	15.7504	15.0074	10.104	2.22883	4.16048	1.18871	673
ENSSSA1UGT002027	4.66606	2.01281	5.76395	6.95334	3.01921	8.14273	2.37877	5.12351	9.05764	8.69167	2.28728	4.02562	3.2022	4.30009	8.32571	5.03202	4.75755	7.22781	2.28728	2.74474	1093
ENSSSA1UGT002028	3.84	4	2.24	1.92	5.76	5.28	3.2	7.84	6.24	11.68	2.72	3.2	4.96	6.4	7.52	10.24	5.6	4.8	0.96	1.6	625
ENSSSA1UGT002031	4.19426	5.29801	3.86313	2.09713	6.07064	6.18102	4.74614	4.96689	3.31126	8.38852	1.65563	4.41501	4.63576	3.75276	11.9205	8.60927	4.63576	5.84989	1.54525	3.86313	906
ENSSSA1UGT002033	3.09278	2.83505	3.35052	4.63918	5.92784	4.38144	3.09278	5.92784	6.70103	8.24742	1.03093	6.4433	3.86598	4.89691	13.9175	9.02062	5.15464	4.63918	1.80412	1.03093	388
ENSSSA1UGT002035	2.14286	5.71429	2.32143	2.67857	6.96429	4.10714	3.39286	5.89286	6.25	11.0714	1.25	4.28571	4.46429	5.35714	8.21429	10.8929	6.07143	4.64286	1.60714	2.67857	560
ENSSSA1UGT002037	5.37634	2.15054	5.91398	5.19713	5.91398	6.63082	3.58423	5.91398	6.09319	8.78136	1.6129	4.48029	5.73477	4.48029	3.04659	8.42294	5.01792	7.16846	0.716846	3.76344	558
ENSSSA1UGT002038	4.85339	2.93225	3.03337	4.85339	6.77452	7.28008	2.83114	6.26896	5.56117	10.0101	2.12336	4.1456	3.94338	2.83114	7.58342	9.70677	4.55005	4.85339	1.82002	4.04449	989
ENSSSA1UGT002040	6.89655	5.74713	3.44828	5.74713	2.29885	6.89655	4.5977	3.44828	1.14943	6.89655	2.29885	4.5977	8.04598	3.44828	12.6437	12.6437	4.5977	1.14943	0	3.44828	87
ENSSSA1UGT002043	4.6875	1.5625	1.5625	7.8125	1.5625	4.6875	7.8125	6.25	9.375	18.75	1.5625	3.125	0	7.8125	4.6875	10.9375	1.5625	3.125	3.125	0	64
ENSSSA1UGT002047	4.91573	1.82584	6.03933	8.14607	2.38764	7.16292	2.24719	6.32022	8.28652	7.58427	2.38764	2.80899	2.52809	4.77528	8.28652	5.47753	3.79213	8.00562	2.94944	4.07303	712
ENSSSA1UGT002051	3.53982	1.76991	0.589971	3.53982	2.65487	4.12979	4.71976	1.47493	4.12979	10.6195	0.294985	3.53982	9.73451	13.8643	10.9145	9.14454	10.3245	2.35988	1.47493	1.17994	339
ENSSSA1UGT002053	6.01093	1.45719	5.46448	3.64299	7.28597	4.00729	3.82514	5.10018	5.64663	8.01457	3.09654	6.55738	5.46448	2.73224	5.82878	6.92168	7.83242	7.28597	1.63934	2.18579	549
ENSSSA1UGT002054	6.89366	2.42813	4.93999	6.4192	2.70723	5.05163	3.54452	3.04214	6.16802	7.92632	2.98632	5.94474	7.39604	7.22858	3.82361	11.1638	5.21909	4.6609	0.362824	2.09322	3583
ENSSSA1UGT002055	2.81518	4.52876	2.44798	2.93758	4.16157	4.89596	2.44798	6.48715	8.69033	10.8935	1.34639	5.26316	5.63035	3.18237	10.2815	9.17993	6.11995	3.79437	2.57038	2.32558	817
ENSSSA1UGT002057	3.69393	3.69393	3.43008	5.27704	5.01319	6.0686	3.16623	3.95778	3.16623	9.49868	2.11082	3.43008	5.01319	6.59631	10.5541	10.2902	6.0686	2.63852	2.90237	3.43008	379
ENSSSA1UGT002061	5.95238	2.38095	3.57143	8.33333	3.57143	5.95238	2.38095	5.95238	4.7619	7.14286	5.95238	7.14286	1.19048	2.38095	5.95238	10.7143	4.7619	8.33333	0	3.57143	84
ENSSSA1UGT002062	2.44499	2.93399	0.733496	1.71149	4.64548	4.64548	3.17848	10.5134	6.11247	11.7359	5.62347	5.37897	3.42298	4.64548	4.15648	11.4914	6.84597	5.86797	1.95599	1.95599	409
ENSSSA1UGT002066	4.86358	1.77936	6.28707	4.38909	6.04982	5.10083	2.9656	5.4567	7.59193	8.06643	3.44009	5.10083	4.50771	3.32147	5.69395	6.04982	6.40569	5.69395	2.72835	4.50771	843
ENSSSA1UGT002070	7.79944	2.50696	5.01393	9.1922	3.06407	5.29248	2.78552	2.78552	7.79944	8.35655	1.67131	4.17827	2.50696	6.68524	11.1421	6.68524	5.29248	5.01393	0.835655	1.39276	359
ENSSSA1UGT002073	10.2778	1.38889	5	5.83333	2.5	6.11111	4.16667	3.05556	3.88889	13.3333	1.66667	5.27778	7.22222	0.833333	4.44444	7.22222	7.5	5.83333	0.555556	3.88889	360
ENSSSA1UGT002075	5.66038	0.554939	5.10544	6.3263	2.44173	6.3263	2.21976	1.88679	3.88457	7.54717	2.77469	6.88124	8.32408	6.21532	7.10322	12.7636	5.10544	4.66149	1.88679	2.33074	901
ENSSSA1UGT002077	5.20833	1.5625	4.16667	11.4583	5.72917	2.08333	2.08333	9.375	11.9792	7.8125	2.60417	5.72917	3.64583	3.125	1.5625	6.77083	5.72917	3.64583	0	5.72917	192
ENSSSA1UGT002078	5.05618	1.40449	9.26966	7.30337	4.49438	4.21348	2.24719	3.93258	8.70787	4.77528	3.08989	3.93258	4.49438	3.37079	8.42697	10.6742	3.93258	5.89888	1.1236	3.65169	356
ENSSSA1UGT002083	4.93274	4.03587	3.58744	3.58744	6.72646	2.24215	7.62332	3.13901	3.13901	7.62332	1.79372	4.4843	6.27803	5.8296	9.41704	12.5561	4.4843	4.03587	0.896861	3.58744	223
ENSSSA1UGT002084	5.06156	0.683995	7.38714	3.28317	4.78796	6.15595	2.32558	3.55677	6.15595	7.79754	3.83037	6.83995	8.75513	2.73598	4.51436	5.88235	6.97674	5.74555	2.73598	4.78796	731
ENSSSA1UGT002085	2.96192	6.91114	2.11566	3.94922	7.19323	4.93653	3.94922	7.19323	6.62906	8.03949	1.41044	6.7701	3.38505	4.23131	7.05219	9.0268	3.66714	3.94922	3.10296	3.52609	709
ENSSSA1UGT002086	7.75862	3.01724	3.01724	3.87931	8.62069	6.46552	2.58621	9.91379	1.72414	12.069	2.15517	3.44828	4.74138	3.44828	4.31034	5.60345	2.15517	3.44828	3.01724	8.62069	232
ENSSSA1UGT002087	5.26316	2.25564	5.26316	4.51128	6.01504	6.76692	6.76692	6.01504	7.5188	9.02256	3.00752	3.00752	5.26316	2.25564	5.26316	6.01504	3.00752	8.27068	2.25564	2.25564	133
ENSSSA1UGT002088	2.91751	3.42052	1.71026	2.21328	4.62777	4.62777	1.30785	7.04225	8.75252	11.9718	1.81087	3.11871	5.73441	3.82294	10.8652	9.75855	5.03018	7.14286	1.40845	2.7163	994
ENSSSA1UGT002089	6.8254	3.1746	4.28571	7.46032	4.44444	4.12698	2.53968	5.71429	6.66667	10.9524	1.26984	3.80952	4.12698	2.69841	5.71429	7.77778	5.87302	8.25397	1.42857	2.85714	630
ENSSSA1UGT002090	4.07186	3.47305	3.47305	4.43114	5.62874	6.82635	3.35329	6.46707	5.7485	8.26347	1.43713	5.7485	2.03593	2.87425	11.018	10.4192	4.43114	5.02994	1.43713	3.83234	835
ENSSSA1UGT002093	3.96947	2.1374	5.34351	3.81679	7.78626	5.34351	4.42748	7.48092	5.19084	9.77099	2.74809	4.8855	3.96947	2.44275	4.58015	8.0916	5.03817	6.71756	1.67939	4.58015	655
ENSSSA1UGT002094	3.07167	1.36519	2.73038	6.48464	6.14334	6.82594	2.38908	4.43686	6.14334	10.2389	2.38908	4.77816	9.55631	5.11945	5.11945	4.09556	5.46075	8.53242	1.36519	3.75427	293
ENSSSA1UGT002095	3.94737	1.80921	2.13816	4.11184	4.93421	2.79605	3.28947	8.88158	7.73026	14.4737	5.59211	3.94737	3.61842	4.60526	3.78289	7.89474	5.26316	7.40132	1.48026	2.30263	608
ENSSSA1UGT002098	4.03226	4.23387	1.20968	2.62097	9.27419	2.41935	4.23387	6.85484	6.85484	9.87903	1.20968	4.03226	5.04032	4.43548	7.45968	10.6855	4.23387	5.44355	1.6129	4.23387	496
ENSSSA1UGT002101	4.49438	5.61798	5.61798	6.74157	3.37079	3.37079	4.49438	5.61798	8.98876	4.49438	2.24719	5.61798	2.24719	3.37079	13.4831	5.61798	4.49438	7.86517	0	2.24719	89
ENSSSA1UGT002105	2.89855	1.73913	3.47826	7.24638	5.21739	2.31884	3.47826	8.11594	7.82609	8.69565	1.73913	8.11594	5.50725	3.18841	6.95652	7.53623	6.37681	4.92754	0.869565	3.76812	345
ENSSSA1UGT002106	3.79638	2.93356	2.67472	4.31406	6.55738	5.26316	2.761	7.59275	5.86713	9.92235	2.07075	4.31406	4.48663	4.31406	8.97325	8.283	6.64366	4.05522	2.07075	3.10613	1159
ENSSSA1UGT002107	5.78512	3.71901	4.54545	5.3719	6.19835	3.30579	2.89256	7.85124	6.19835	10.7438	2.47934	7.85124	1.23967	7.02479	4.13223	4.95868	4.54545	6.19835	1.23967	3.71901	242
ENSSSA1UGT002109	14.4928	2.89855	0	0	5.7971	14.4928	1.44928	5.7971	2.89855	8.69565	5.7971	1.44928	2.89855	4.34783	1.44928	8.69565	1.44928	13.0435	1.44928	2.89855	69
ENSSSA1UGT002113	6.32603	2.6764	2.6764	7.05596	4.37956	3.89294	2.6764	4.37956	7.54258	9.97567	1.94647	5.59611	6.08273	4.37956	6.81265	6.56934	7.29927	7.29927	0.729927	1.70316	411
ENSSSA1UGT002114	5.56745	1.2848	4.71092	8.35118	3.21199	4.71092	1.2848	7.28051	8.35118	9.20771	1.49893	5.35332	4.92505	4.28266	4.49679	10.0642	4.49679	7.70878	0.428266	2.78373	467
ENSSSA1UGT002115	6.42722	4.7259	2.6465	4.91493	4.15879	6.42722	2.0794	5.67108	5.86011	9.26276	1.32325	3.59168	6.04915	4.15879	11.7202	8.31758	3.40265	3.40265	3.59168	2.26843	529
ENSSSA1UGT002116	5.99676	2.26904	4.21394	5.67261	5.51053	5.83468	2.26904	5.67261	5.67261	10.2107	2.10697	4.05186	4.53809	5.34846	5.83468	8.9141	4.70016	7.13128	1.2966	2.75527	617
ENSSSA1UGT002117	4.59016	1.63934	7.21311	6.55738	7.86885	4.91803	2.62295	7.54098	7.21311	9.5082	3.27869	4.59016	4.59016	3.93443	2.95082	7.21311	4.91803	6.22951	0.327869	2.29508	305
ENSSSA1UGT002121	5.29412	0.980392	5.09804	12.1569	4.11765	2.7451	1.56863	5.68627	10.7843	10.1961	2.15686	3.92157	4.11765	5.29412	6.07843	7.05882	4.5098	4.70588	1.37255	2.15686	510
ENSSSA1UGT002122	7.07692	2.30769	5.23077	4.30769	6.30769	4.92308	3.38462	5.07692	5.38462	7.38462	2	3.53846	7.53846	3.53846	6	10.6154	5.53846	6.30769	1.53846	2	650
ENSSSA1UGT002123	5.88235	5.56439	3.33863	6.51828	3.49762	4.61049	3.17965	4.13355	3.33863	6.20032	0.476948	6.3593	4.13355	5.40541	10.0159	13.5135	5.24642	4.45151	1.43084	2.7027	629
ENSSSA1UGT002124	6.66209	3.22802	2.47253	3.91484	4.80769	6.04396	2.1978	4.94505	4.80769	9.27198	2.1978	3.02198	5.08242	3.02198	9.40934	10.2335	6.93681	6.66209	1.71703	3.36538	1456
ENSSSA1UGT002126	3.74016	2.55906	4.92126	4.72441	7.48031	4.52756	2.3622	7.28346	7.28346	8.26772	2.55906	5.70866	3.14961	3.54331	7.48031	6.29921	6.69291	6.10236	1.9685	3.34646	508
ENSSSA1UGT002128	7.00713	0.831354	4.15677	4.15677	4.86936	7.12589	3.44418	4.27553	3.08789	9.26366	2.25653	5.93824	7.24466	3.68171	4.63183	8.66983	5.93824	8.19477	1.18765	4.038	842
ENSSSA1UGT002130	3.9823	1.76991	3.9823	5.75221	5.75221	5.75221	2.21239	4.86726	7.52212	11.5044	2.65487	6.19469	5.75221	2.65487	4.86726	6.19469	6.19469	5.30973	2.65487	4.42478	226
ENSSSA1UGT002131	4.52099	5.70506	1.61464	4.41335	7.64263	4.95156	3.87513	6.5662	8.50377	10.1184	1.61464	4.52099	2.69107	4.95156	6.5662	9.58019	4.52099	4.62863	1.07643	1.93757	929
ENSSSA1UGT002135	7.08661	0.787402	4.72441	4.72441	4.72441	3.14961	3.93701	7.87402	9.44882	14.9606	0.787402	8.66142	1.5748	3.14961	7.87402	11.811	3.93701	0	0.787402	0	127
ENSSSA1UGT002137	5.57276	3.86997	3.09598	3.56037	5.57276	3.40557	2.63158	5.41796	7.27554	10.3715	2.01238	4.95356	5.88235	4.02477	6.34675	10.6811	4.95356	4.17957	2.32198	3.86997	646
ENSSSA1UGT002141	3.74332	6.41711	6.41711	4.27807	4.27807	5.34759	7.48663	2.6738	2.6738	11.7647	2.6738	5.88235	6.95187	4.81283	8.55615	7.48663	1.06952	3.74332	1.60428	2.13904	187
ENSSSA1UGT002142	4.74453	1.3382	4.86618	2.91971	5.10949	4.86618	2.18978	4.86618	6.20438	11.0706	1.94647	5.71776	4.98783	3.64964	5.59611	13.2603	6.32603	5.23114	1.45985	3.64964	822
ENSSSA1UGT002147	9.30233	2.32558	3.72093	6.51163	5.11628	5.5814	0.465116	3.25581	6.97674	9.76744	1.86047	6.04651	0.930233	5.5814	4.65116	9.76744	7.90698	5.11628	3.25581	1.86047	215
ENSSSA1UGT002148	3.6036	4.5045	6.30631	5.40541	5.40541	4.5045	3.6036	7.20721	6.30631	4.5045	1.8018	4.5045	4.5045	4.5045	13.5135	3.6036	5.40541	8.10811	0	2.7027	111
ENSSSA1UGT002149	5.91549	1.59624	3.84977	9.48357	2.8169	2.53521	1.78404	6.57277	11.2676	11.1737	1.97183	6.00939	1.78404	6.57277	7.60563	7.23005	4.88263	4.78873	0.0938967	2.06573	1065
ENSSSA1UGT002150	5.45278	1.55794	8.56865	9.25024	4.28432	4.86855	1.26582	3.60273	6.32911	8.86076	3.0185	6.81597	4.96592	3.50536	2.3369	11.3924	5.16066	5.93963	0.876339	1.94742	1027
ENSSSA1UGT002152	7.54717	2.51572	3.77358	3.77358	6.28931	5.40881	2.7673	3.89937	3.6478	7.92453	0.503145	2.51572	8.55346	6.91824	10.1887	10.0629	4.40252	5.28302	1.38365	2.64151	795
ENSSSA1UGT002154	7.36196	1.22699	5.31697	5.52147	6.33947	3.88548	3.68098	5.52147	5.72597	10.8384	1.43149	3.88548	6.74847	3.68098	6.33947	8.58896	4.49898	4.08998	2.04499	3.27198	489
ENSSSA1UGT002155	6.22776	3.91459	2.13523	6.40569	3.91459	7.29537	3.20285	3.55872	6.76157	7.65125	0.711744	3.91459	4.98221	8.00712	7.65125	9.60854	4.09253	6.04982	1.60142	2.31317	562
ENSSSA1UGT002157	4.62185	5.2521	2.10084	3.9916	8.19328	3.57143	3.9916	5.88235	4.83193	10.084	1.47059	5.2521	3.57143	2.52101	10.2941	9.87395	4.41176	5.46218	1.05042	3.57143	476
ENSSSA1UGT002158	4.09556	3.07167	2.04778	5.11945	5.11945	5.11945	4.09556	5.80205	6.14334	7.16724	1.70648	6.82594	1.36519	6.82594	7.50853	11.9454	6.48464	4.43686	2.04778	3.07167	293
ENSSSA1UGT002159	2.74914	1.37457	1.37457	3.09278	7.90378	3.78007	2.06186	6.18557	6.52921	12.0275	4.46735	5.15464	5.49828	3.09278	3.43643	13.0584	7.90378	6.52921	1.03093	2.74914	291
ENSSSA1UGT002160	3.49265	3.125	2.94118	4.22794	8.63971	2.38971	3.67647	8.08824	5.33088	12.1324	1.65441	3.67647	3.49265	4.77941	5.88235	11.3971	5.69853	5.33088	0.919118	3.125	544
ENSSSA1UGT002161	8.62471	3.0303	4.4289	3.0303	9.09091	6.29371	1.6317	7.22611	2.7972	12.8205	3.7296	3.2634	3.2634	1.6317	1.8648	9.09091	4.8951	8.62471	1.1655	3.4965	429
ENSSSA1UGT002162	3.6036	4.5045	6.30631	5.40541	5.40541	4.5045	3.6036	7.20721	6.30631	4.5045	1.8018	4.5045	4.5045	4.5045	13.5135	3.6036	5.40541	8.10811	0	2.7027	111
ENSSSA1UGT002163	4.72441	0	3.93701	6.29921	7.08661	1.5748	4.72441	11.0236	3.93701	11.0236	3.93701	3.93701	5.51181	1.5748	2.3622	14.1732	5.51181	5.51181	0.787402	2.3622	127
ENSSSA1UGT002165	2.48834	2.33281	2.48834	1.71073	4.35459	1.86625	4.04355	7.93157	9.33126	12.4417	4.97667	4.66563	4.19907	8.8647	6.06532	7.93157	5.75428	4.04355	1.71073	2.79938	643
ENSSSA1UGT002166	1.50376	0	3.00752	6.01504	5.26316	6.76692	0.75188	7.5188	7.5188	9.77444	0	9.77444	7.5188	2.25564	9.02256	5.26316	6.01504	4.51128	0.75188	6.76692	133
ENSSSA1UGT002170	5.15464	1.85567	3.29897	8.65979	4.53608	2.06186	1.03093	8.24742	11.3402	11.3402	2.68041	4.94845	2.8866	6.39175	7.42268	5.56701	5.36082	4.74227	0.618557	1.85567	485
ENSSSA1UGT002171	4.91071	3.125	3.125	2.23214	6.69643	3.57143	0.446429	4.46429	7.14286	10.7143	6.25	5.80357	4.01786	4.91071	4.46429	12.0536	2.23214	4.46429	4.01786	5.35714	224
ENSSSA1UGT002173	2.45098	0.490196	5.88235	5.88235	1.96078	16.1765	22.0588	0	28.4314	0	0	1.47059	0	0	0.490196	6.37255	0.490196	0	0	7.84314	204
ENSSSA1UGT002174	3.8835	9.70874	2.91262	2.91262	1.94175	3.8835	4.85437	3.8835	10.6796	9.70874	4.85437	4.85437	2.91262	2.91262	2.91262	10.6796	4.85437	3.8835	2.91262	4.85437	103
ENSSSA1UGT002175	3.91254	1.95627	4.94822	3.33717	6.32911	3.56732	2.7618	9.20598	7.82509	12.8884	1.15075	7.82509	3.22209	3.56732	4.37284	9.55121	4.60299	4.60299	0.690449	3.68239	869
ENSSSA1UGT002180	6.81818	4.54545	2.27273	9.09091	0	9.09091	2.27273	11.3636	6.81818	9.09091	0	0	9.09091	0	4.54545	6.81818	6.81818	4.54545	2.27273	4.54545	44
ENSSSA1UGT002183	6.14187	2.68166	1.6436	3.3737	6.57439	2.76817	2.68166	5.27682	5.79585	9.9481	1.81661	4.67128	5.79585	4.06574	9.42907	11.4187	7.78547	5.27682	1.29758	1.55709	1156
ENSSSA1UGT002184	3.38983	0	5.08475	6.77966	5.08475	5.08475	3.38983	12.7119	13.5593	7.62712	1.69492	5.9322	4.23729	2.54237	3.38983	5.9322	3.38983	8.47458	0	1.69492	118
ENSSSA1UGT002186	6.30324	1.87394	3.2368	6.81431	5.28109	6.30324	3.2368	3.74787	5.62181	8.8586	2.89608	3.91823	3.91823	3.91823	7.83646	11.2436	4.94037	7.15503	1.02215	1.87394	587
ENSSSA1UGT002188	6.77419	2.90323	2.58065	6.77419	3.22581	9.67742	0.967742	7.41935	5.48387	8.06452	3.22581	5.80645	5.16129	2.58065	5.16129	6.77419	5.48387	8.3871	0.322581	3.22581	310
ENSSSA1UGT002190	5.78447	2.2187	5.54675	7.52773	5.15055	4.35816	2.93185	7.0523	7.76545	10.6181	1.66403	3.88273	5.30903	3.16957	5.70523	7.13154	5.07132	6.2599	0.633914	2.2187	1262
ENSSSA1UGT002191	5.10949	2.18978	8.0292	5.10949	5.10949	3.64964	2.18978	8.0292	7.29927	9.48905	1.45985	5.83942	5.10949	1.45985	1.45985	8.0292	5.83942	13.8686	0.729927	0	137
ENSSSA1UGT002192	2.6087	2.31884	2.89855	3.76812	7.82609	5.21739	2.02899	7.82609	8.69565	12.1739	3.18841	3.76812	4.63768	2.6087	4.92754	9.85507	2.6087	6.66667	1.44928	4.92754	345
ENSSSA1UGT002195	6.65111	3.50058	4.08401	5.13419	5.60093	3.61727	3.61727	6.65111	6.30105	7.00117	1.51692	4.90082	5.36756	3.85064	5.71762	9.91832	5.71762	5.71762	1.51692	3.61727	857
ENSSSA1UGT002196	3.83838	1.81818	1.61616	3.43434	8.28283	3.83838	2.0202	6.86869	9.49495	14.5455	3.0303	5.25253	3.0303	2.62626	6.66667	8.48485	5.65657	5.65657	1.81818	2.0202	495
ENSSSA1UGT002198	4.54545	2.95455	3.18182	3.18182	8.86364	3.40909	2.27273	6.81818	7.27273	10.4545	2.04545	6.13636	3.18182	2.27273	7.04545	12.7273	4.54545	5.45455	0.909091	2.72727	440
ENSSSA1UGT002199	4.92676	1.99734	5.7257	5.99201	4.79361	5.05992	1.86418	5.99201	7.85619	10.5193	1.99734	6.12517	3.06258	3.06258	6.65779	8.52197	3.32889	8.38881	0.665779	3.46205	751
ENSSSA1UGT002200	15.2655	0.663717	4.42478	7.30088	1.32743	9.73451	3.76106	2.65487	2.65487	9.73451	1.54867	1.32743	4.86726	2.65487	7.52212	5.75221	5.97345	11.7257	0.663717	0.442478	452
ENSSSA1UGT002201	4.71204	3.9267	2.22513	3.14136	4.97382	4.45026	2.35602	4.45026	5.36649	9.29319	1.3089	2.35602	5.49738	3.14136	8.90052	14.267	8.63874	6.02094	2.22513	2.74869	764
ENSSSA1UGT002204	9.06433	1.16959	5.55556	7.30994	4.38596	5.26316	2.04678	5.55556	5.55556	8.77193	2.04678	9.64912	3.50877	6.43275	4.09357	11.1111	1.75439	4.09357	0.292398	2.33918	342
ENSSSA1UGT002207	4.91803	3.00546	6.55738	4.91803	5.7377	3.27869	1.63934	7.10383	7.9235	9.83607	3.55191	5.19126	3.55191	5.46448	3.55191	8.46995	5.7377	5.7377	0.546448	3.27869	366
ENSSSA1UGT002208	5.02283	2.28311	4.10959	6.84932	2.28311	5.02283	2.28311	5.47945	7.76256	9.13242	3.19635	5.47945	4.10959	5.02283	4.10959	12.7854	6.39269	3.19635	2.73973	2.73973	219
ENSSSA1UGT002209	6.46688	1.97161	4.57413	6.54574	4.49527	3.62776	2.68139	5.04732	4.96845	10.8044	2.05047	4.25868	5.44164	4.57413	8.59621	9.54259	5.99369	4.88959	1.18297	2.28707	1268
ENSSSA1UGT002210	5.74627	3.0597	2.76119	4.25373	8.73134	3.80597	2.08955	6.1194	6.34328	11.5672	2.46269	4.85075	3.50746	3.13433	6.1194	8.8806	5.07463	5.59701	1.71642	4.1791	1340
ENSSSA1UGT002211	6.77083	3.64583	6.77083	8.85417	3.64583	5.20833	0.520833	5.20833	10.4167	8.85417	2.08333	3.64583	6.25	2.60417	4.16667	4.16667	4.16667	9.375	1.04167	2.60417	192
ENSSSA1UGT002214	5.49451	5.93407	2.85714	5.27473	6.37363	2.85714	5.05495	5.27473	3.95604	9.45055	2.63736	3.73626	3.73626	4.83516	5.27473	12.3077	3.73626	6.81319	1.0989	3.2967	455
ENSSSA1UGT002215	4.61095	2.01729	5.18732	5.18732	8.06916	4.32277	1.72911	6.34006	5.4755	11.5274	2.01729	6.05187	3.45821	3.7464	5.4755	7.20461	6.91643	5.4755	2.30548	2.88184	347
ENSSSA1UGT002218	5.18868	2.59434	4.12736	5.54245	5.42453	3.65566	2.35849	5.89623	7.31132	11.4387	2.12264	4.24528	6.36792	3.30189	6.48585	11.2028	4.83491	5.42453	1.06132	1.41509	848
ENSSSA1UGT002220	4.12371	4.3299	1.85567	3.50515	6.80412	5.15464	3.09278	4.3299	7.83505	11.134	1.64948	3.91753	4.3299	4.53608	8.24742	9.27835	3.71134	4.74227	4.94845	2.47423	485
ENSSSA1UGT002221	11.8644	10.1695	1.69492	0	8.47458	13.5593	0	3.38983	5.08475	6.77966	6.77966	5.08475	0	3.38983	0	11.8644	1.69492	8.47458	1.69492	0	59
ENSSSA1UGT002222	4.14938	2.28216	5.80913	5.18672	6.639	4.14938	3.73444	8.29876	5.60166	10.3734	2.07469	5.18672	4.14938	3.73444	2.90456	8.92116	4.35685	6.43154	1.65975	4.35685	482
ENSSSA1UGT002224	6.38821	3.4398	3.9312	5.65111	6.38821	4.1769	1.7199	6.38821	7.61671	10.5651	2.457	4.4226	4.4226	3.9312	3.6855	9.58231	5.15971	6.87961	0.4914	2.7027	407
ENSSSA1UGT002228	5.51471	1.83824	3.30882	7.35294	6.61765	3.67647	2.20588	5.51471	9.19118	9.55882	2.57353	2.94118	2.94118	6.98529	8.82353	7.72059	4.04412	4.77941	1.10294	3.30882	272
ENSSSA1UGT002229	8.56164	3.08219	5.47945	5.82192	3.76712	7.19178	2.05479	7.19178	8.21918	8.90411	3.42466	4.10959	3.42466	3.76712	2.73973	9.58904	2.73973	7.53425	1.0274	1.36986	292
ENSSSA1UGT002230	10.0971	2.3301	2.91262	2.3301	2.91262	3.49515	3.1068	7.37864	1.74757	8.34951	3.49515	4.46602	5.04854	2.3301	6.40777	12.233	7.96117	8.54369	1.94175	2.91262	515
ENSSSA1UGT002231	5.46529	2.21566	4.2836	2.8065	7.68095	4.2836	3.39734	6.35155	5.16987	12.9985	2.21566	5.613	3.39734	3.10192	5.02216	8.86263	4.43131	6.20384	1.77253	4.72674	677
ENSSSA1UGT002232	4.16667	1.66667	0.625	2.70833	2.5	4.375	2.91667	7.08333	10.2083	13.75	6.66667	3.75	3.95833	5	4.375	10	7.5	4.79167	2.5	1.45833	480
ENSSSA1UGT002233	4.30108	0	3.22581	3.22581	8.60215	5.37634	3.22581	11.828	9.67742	12.9032	5.37634	4.30108	4.30108	1.07527	4.30108	2.15054	6.45161	3.22581	0	6.45161	93
ENSSSA1UGT002235	7.07965	3.53982	3.53982	6.19469	2.65487	3.53982	1.76991	7.07965	2.65487	11.5044	4.42478	1.76991	9.73451	2.65487	7.07965	13.2743	4.42478	5.30973	0	1.76991	113
ENSSSA1UGT002236	4.41026	0.923077	5.74359	4.51282	5.64103	5.53846	2.87179	7.89744	5.33333	8.61538	1.53846	5.53846	5.94872	4.20513	3.28205	10.6667	6.05128	8.61538	0.717949	1.94872	975
ENSSSA1UGT002237	5.08167	1.99637	4.35572	5.44465	9.61887	5.44465	2.90381	8.52995	6.71506	8.89292	2.72232	4.17423	3.44828	2.90381	3.99274	6.89655	6.35209	6.71506	1.63339	2.17786	551
ENSSSA1UGT002238	4.5045	0.900901	1.8018	9.00901	4.5045	3.6036	1.8018	4.5045	6.30631	6.30631	7.20721	6.30631	2.7027	2.7027	6.30631	7.20721	5.40541	13.5135	0.900901	4.5045	111
ENSSSA1UGT002242	1.38889	0	11.1111	1.38889	13.8889	11.1111	2.77778	1.38889	4.16667	12.5	2.77778	1.38889	1.38889	6.94444	1.38889	11.1111	2.77778	11.1111	1.38889	0	72
ENSSSA1UGT002243	8.47751	0.865052	4.15225	3.97924	3.97924	7.61246	2.76817	9.51557	4.67128	10.8997	1.7301	4.84429	3.80623	2.76817	3.97924	10.7266	5.88235	5.88235	0.519031	2.94118	578
ENSSSA1UGT002244	6.399	1.25471	5.26976	9.7867	4.266	2.25847	1.88206	5.64617	8.65747	11.4178	1.75659	4.51694	5.01882	5.89711	4.89335	7.15182	5.14429	4.51694	1.88206	2.38394	797
ENSSSA1UGT002246	3.38664	3.01035	1.78739	3.19849	6.11477	1.88147	2.8222	7.52587	9.59548	14.2992	2.44591	5.45626	2.72813	4.79774	4.42145	10.6303	5.55033	5.36218	1.97554	3.01035	1063
ENSSSA1UGT002248	4.7619	6.34921	0.793651	0.793651	6.34921	4.7619	3.1746	3.1746	3.96825	10.3175	3.96825	7.14286	5.55556	3.96825	3.1746	11.9048	11.9048	6.34921	0.793651	0.793651	126
ENSSSA1UGT002252	1.9802	1.9802	3.9604	3.9604	5.94059	9.90099	0.990099	8.91089	2.9703	14.8515	1.9802	5.94059	6.93069	4.9505	6.93069	7.92079	2.9703	2.9703	1.9802	1.9802	101
ENSSSA1UGT002253	6.84105	2.41449	3.42052	3.42052	6.23742	7.24346	2.41449	7.24346	4.82897	8.65191	2.01207	2.21328	5.03018	4.02414	8.85312	7.04225	6.23742	5.83501	2.61569	3.42052	497
ENSSSA1UGT002254	3.87931	3.23276	4.74138	8.40517	4.31034	5.71121	2.15517	4.52586	8.0819	8.72845	1.93966	7.97414	2.69397	2.69397	6.46552	11.0991	5.71121	4.63362	0.646552	2.37069	928
ENSSSA1UGT002255	6.90236	1.17845	4.0404	8.58586	4.7138	6.06061	2.0202	3.0303	5.21886	7.40741	1.51515	2.3569	8.24916	3.53535	9.09091	10.9428	3.7037	6.90236	1.85185	2.6936	594
ENSSSA1UGT002261	3.76851	3.9031	2.42261	4.57604	6.05653	5.65276	4.03769	5.1144	4.97981	10.0942	0.942127	4.30686	4.71063	5.92194	10.6326	9.42127	5.24899	3.36474	1.21131	3.63392	743
ENSSSA1UGT002263	8.0402	1.00503	9.54774	5.52764	2.51256	5.02513	2.51256	4.52261	5.02513	4.52261	3.51759	6.03015	4.52261	7.03518	5.02513	12.0603	4.52261	6.53266	1.00503	1.50754	199
ENSSSA1UGT002266	6.33245	2.37467	3.69393	4.74934	7.38786	6.33245	2.90237	4.74934	4.48549	7.91557	0.527704	3.43008	4.74934	7.38786	11.8734	7.65172	2.90237	5.80475	1.05541	3.69393	379
ENSSSA1UGT002268	2.63158	0.438596	4.82456	7.01754	0.438596	17.1053	20.1754	0.877193	27.6316	2.63158	0.438596	0.438596	0.438596	0.877193	0.438596	4.38596	0.877193	0	1.75439	6.57895	228
ENSSSA1UGT002269	4.32099	1.54321	5.24691	4.01235	4.93827	3.39506	3.39506	11.1111	6.48148	12.963	1.23457	8.33333	3.7037	3.39506	2.16049	8.33333	6.79012	3.08642	0.308642	5.24691	324
ENSSSA1UGT002270	7.29002	3.80349	3.16957	4.4374	3.64501	5.86371	3.80349	4.27892	3.80349	10.1426	2.37718	4.75436	4.59588	6.02219	5.86371	10.6181	5.07132	6.49762	1.26783	2.69414	631
ENSSSA1UGT002273	3.5868	3.73027	2.43902	3.73027	6.02582	5.73888	4.5911	5.16499	5.88235	8.60832	1.43472	5.59541	1.57819	3.01291	9.7561	10.043	7.60402	4.87805	2.00861	4.5911	697
ENSSSA1UGT002274	2.89855	1.77134	8.85668	8.37359	4.99195	4.99195	1.77134	5.31401	8.69565	7.40741	0.966184	4.1868	4.99195	1.44928	14.3317	5.95813	3.86473	4.83092	0.483092	3.86473	621
ENSSSA1UGT002276	4.6595	2.15054	4.6595	4.6595	5.73477	5.73477	3.22581	5.01792	8.60215	7.8853	5.01792	5.01792	3.94265	4.30108	6.09319	8.24373	5.01792	3.94265	2.15054	3.94265	279
ENSSSA1UGT002277	4.79233	3.19489	4.15335	6.23003	7.34824	3.35463	2.23642	4.3131	6.86901	10.7029	1.11821	5.11182	3.67412	3.03514	8.14696	10.8626	4.79233	6.70927	1.27796	2.07668	626
ENSSSA1UGT002278	6.24204	1.91083	3.05732	6.24204	7.26115	5.85987	1.78344	5.98726	6.75159	10.5732	2.54777	2.03822	3.69427	2.03822	7.13376	7.26115	5.35032	8.28025	2.03822	3.94904	785
ENSSSA1UGT002281	6.81537	2.3544	3.22181	6.07187	4.95663	7.93061	2.23048	8.05452	3.84139	11.1524	2.85006	3.71747	5.32838	3.71747	4.83271	6.07187	6.19579	6.93928	1.73482	1.98265	807
ENSSSA1UGT002282	5.74621	0.957702	4.15004	6.38468	3.19234	5.6664	3.35196	4.54908	4.30966	9.73663	1.35674	4.86832	7.66161	4.07023	6.94334	10.6145	5.98563	4.86832	1.83559	3.751	1253
ENSSSA1UGT002283	4.58716	1.17955	4.06291	5.89777	7.60157	3.27654	2.35911	7.47051	7.20839	10.0917	1.57274	5.24246	2.49017	4.32503	7.20839	9.30537	4.06291	8.519	0.78637	2.75229	763
ENSSSA1UGT002285	1.31579	0	10.5263	1.31579	13.1579	7.89474	2.63158	2.63158	7.89474	13.1579	1.31579	2.63158	0	7.89474	2.63158	11.8421	2.63158	9.21053	1.31579	0	76
ENSSSA1UGT002289	7.26202	3.0422	1.6683	2.64966	4.7105	6.96762	1.76644	4.12169	2.55152	7.45829	1.07949	2.94406	8.34151	2.74779	12.9539	13.8371	8.73405	3.72915	1.86457	1.57017	1019
ENSSSA1UGT002290	8.57143	1.90476	1.90476	2.85714	3.80952	19.0476	0	1.90476	3.80952	6.66667	1.90476	5.71429	10.4762	1.90476	3.80952	5.71429	1.90476	4.7619	3.80952	9.52381	105
ENSSSA1UGT002291	5.46968	1.54578	4.63734	4.75624	6.18312	3.32937	2.85375	7.13436	8.79905	10.5826	1.18906	4.63734	5.46968	3.68609	5.35077	9.03686	5.58859	4.87515	0.475624	4.39952	841
ENSSSA1UGT002292	6.08108	3.37838	4.05405	6.75676	5.40541	5.40541	2.7027	6.75676	7.43243	8.10811	0.675676	6.08108	6.75676	2.7027	3.37838	10.1351	5.40541	4.72973	0.675676	3.37838	148
ENSSSA1UGT002294	3.76344	4.30108	2.41935	6.58602	4.7043	4.30108	0.94086	5.91398	12.2312	8.73656	1.47849	5.51075	3.62903	5.64516	6.85484	9.81183	5.77957	2.82258	0.806452	3.76344	744
ENSSSA1UGT002295	3.02222	3.2	1.24444	2.04444	4.8	3.02222	2.75556	6.04444	7.73333	14.6667	4.17778	5.15556	4.08889	5.15556	6.48889	10.6667	5.51111	6.31111	1.68889	2.22222	1125
ENSSSA1UGT002297	8.33333	2.17391	4.71014	9.05797	4.34783	5.07246	0.724638	2.89855	11.9565	10.1449	2.53623	6.88406	2.53623	3.98551	3.98551	6.15942	2.53623	6.52174	0.724638	4.71014	276
ENSSSA1UGT002299	4.50607	2.59965	4.07279	4.41941	3.98614	3.29289	3.03293	8.40555	6.58579	11.1785	1.47314	6.84575	4.50607	4.67938	5.28596	9.09879	7.97227	3.03293	1.90641	3.11958	1154
ENSSSA1UGT002300	2.90179	4.24107	1.5625	3.34821	9.375	2.90179	3.125	6.47321	7.36607	11.8304	1.33929	4.46429	3.34821	3.57143	7.58929	11.1607	6.47321	5.35714	0.892857	2.67857	448
ENSSSA1UGT002302	6.04027	4.12272	3.83509	6.51965	2.78044	11.1218	3.45158	2.01342	4.98562	4.60211	1.05465	3.83509	5.36913	4.12272	9.97124	9.58773	4.79386	5.94439	2.9722	2.87632	1043
ENSSSA1UGT002303	8.67052	0	3.46821	8.67052	5.20231	4.04624	3.46821	2.31214	6.35838	8.09249	3.46821	4.04624	4.62428	3.46821	10.4046	4.04624	6.35838	6.93642	4.04624	2.31214	173
ENSSSA1UGT002306	6.47249	1.94175	5.17799	5.82524	5.82524	2.91262	3.55987	5.50162	5.17799	11.0032	1.61812	5.82524	5.82524	3.23625	6.47249	9.38511	4.85437	3.8835	0.970874	4.53074	309
ENSSSA1UGT002307	4.44444	4.44444	8.88889	4.44444	5.55556	7.77778	2.22222	0	11.1111	10	3.33333	3.33333	2.22222	7.77778	1.11111	6.66667	3.33333	10	2.22222	1.11111	90
ENSSSA1UGT002308	5.92334	2.32288	5.22648	5.34262	4.99419	5.22648	3.36818	6.96864	5.69106	8.94309	1.74216	4.7619	5.69106	3.9489	5.69106	7.20093	4.87805	6.38792	1.16144	4.52962	861
ENSSSA1UGT002309	9.10569	1.13821	7.96748	6.99187	3.57724	6.34146	2.27642	7.15447	8.61789	10.0813	1.46341	4.87805	2.60163	3.08943	4.87805	5.85366	5.36585	6.50407	0.650407	1.46341	615
ENSSSA1UGT002311	5.44629	2.26929	3.32829	4.23601	6.35401	3.47958	3.177	7.5643	7.71558	11.1952	0.907716	5.29501	5.59758	5.14372	3.63086	9.53101	6.05144	4.53858	1.36157	3.177	661
ENSSSA1UGT002312	4.55312	1.85497	5.56492	8.26307	3.54132	7.75717	2.19224	5.22766	8.4317	9.94941	2.19224	2.86678	3.03541	4.55312	8.26307	4.38449	4.55312	7.58853	2.52951	2.69815	593
ENSSSA1UGT002313	4.2524	0.823045	1.37174	4.11523	2.05761	5.89849	3.7037	6.99588	11.9342	12.3457	3.7037	3.7037	5.62414	5.62414	7.54458	5.34979	4.38957	6.72154	2.74348	1.09739	729
ENSSSA1UGT002314	4.86486	2.43243	3.24324	5.94595	8.64865	4.32432	2.7027	7.56757	4.05405	10.2703	1.35135	4.32432	5.67568	4.59459	4.86486	8.64865	5.94595	6.48649	1.62162	2.43243	370
ENSSSA1UGT002320	5.22565	2.3753	2.85036	5.46318	4.98812	3.32542	2.85036	4.75059	3.08789	9.26366	2.3753	4.75059	6.17577	5.22565	8.7886	12.3515	5.22565	8.07601	0.950119	1.90024	421
ENSSSA1UGT002323	2.75229	1.83486	2.75229	4.58716	6.42202	4.58716	3.66972	5.50459	9.17431	13.7615	3.66972	4.58716	3.66972	0.917431	3.66972	9.17431	4.58716	5.50459	0	9.17431	109
ENSSSA1UGT002324	2.97542	1.81113	4.26908	4.52781	7.89133	4.65718	2.84605	7.6326	7.11514	9.83182	2.97542	6.08021	3.36352	3.36352	5.82147	10.3493	4.26908	6.33894	1.16429	2.71669	773
ENSSSA1UGT002326	4.39394	2.87879	2.27273	3.78788	6.51515	5.30303	4.09091	6.06061	5.30303	9.09091	1.51515	4.24242	5.15152	3.33333	6.81818	11.5152	5.75758	5.60606	2.27273	4.09091	660
ENSSSA1UGT002329	2.8169	0	5.6338	5.6338	4.22535	8.4507	1.40845	5.6338	8.4507	19.7183	4.22535	0	4.22535	0	4.22535	4.22535	4.22535	9.85915	0	7.04225	71
ENSSSA1UGT002331	3.66826	1.27592	4.46571	6.53907	3.0303	2.55183	2.39234	6.06061	6.06061	15.949	1.91388	8.61244	4.78469	3.66826	4.14673	10.6858	6.06061	5.74163	0.637959	1.75439	627
ENSSSA1UGT002332	3.0303	4.0404	2.0202	4.0404	7.07071	2.0202	1.0101	9.09091	5.05051	13.1313	1.0101	7.07071	2.0202	3.0303	3.0303	15.1515	8.08081	8.08081	0	2.0202	99
ENSSSA1UGT002333	4.79532	3.15789	3.97661	7.01754	6.90058	3.04094	4.44444	5.73099	6.66667	9.7076	2.33918	4.32749	5.61404	3.85965	5.49708	8.65497	4.67836	4.21053	1.05263	4.32749	855
ENSSSA1UGT002334	4.61538	1.92308	3.75	4.61538	6.92308	7.59615	1.92308	5.09615	7.01923	10.4808	1.92308	5.76923	4.32692	3.36538	5.19231	6.92308	5	6.25	1.82692	5.48077	1040
ENSSSA1UGT002335	4.41558	5.19481	5.97403	7.79221	7.01299	3.8961	2.33766	4.93506	7.79221	8.57143	1.2987	4.15584	5.97403	5.19481	3.8961	8.57143	2.5974	5.71429	2.07792	2.5974	385
ENSSSA1UGT002337	7.73893	1.95804	4.61538	5.59441	3.21678	3.2634	2.65734	6.06061	5.54779	14.2657	2.61072	3.68298	5.45455	4.14918	4.14918	8.25175	6.48019	6.34033	1.07226	2.89044	2145
ENSSSA1UGT002339	7.61421	4.56853	5.32995	6.34518	5.07614	8.12183	3.04569	5.58376	6.34518	5.58376	1.77665	4.56853	4.31472	3.29949	4.31472	6.34518	5.32995	5.83756	2.79188	3.80711	394
ENSSSA1UGT002340	5.27578	2.15827	8.63309	6.95444	5.27578	4.79616	1.43885	6.71463	7.43405	11.5108	1.67866	6.95444	3.11751	3.11751	5.03597	8.15348	4.07674	4.31655	1.19904	2.15827	417
ENSSSA1UGT002341	6.67594	1.94715	1.80807	5.70236	6.39777	5.98053	2.36439	5.98053	4.17246	11.5438	3.33797	2.64256	4.31154	2.92072	5.14604	8.48401	6.25869	7.64951	1.5299	5.14604	719
ENSSSA1UGT002342	5.06329	0.632911	4.74684	5.6962	8.22785	4.11392	5.06329	9.81013	6.96203	7.59494	1.58228	6.32911	5.37975	1.89873	4.11392	6.01266	4.11392	7.27848	0.632911	4.74684	316
ENSSSA1UGT002343	4.21053	1.05263	3.15789	5.78947	4.21053	5.78947	1.05263	7.36842	6.84211	16.3158	1.57895	4.73684	5.78947	3.68421	7.36842	7.36842	3.68421	6.84211	0	3.15789	190
ENSSSA1UGT002347	4.44444	2.96296	8.39506	3.95062	3.20988	7.65432	2.22222	7.90123	5.18519	8.64198	1.23457	4.93827	4.19753	2.46914	5.67901	6.66667	5.67901	7.40741	3.95062	3.20988	405
ENSSSA1UGT002348	3.94945	2.21169	5.6872	7.26698	5.21327	3.31754	2.8436	4.42338	5.52923	9.63665	2.68562	3.79147	5.6872	4.42338	5.52923	10.2686	6.00316	6.47709	0.947867	4.10742	633
ENSSSA1UGT002350	6.01093	3.27869	6.01093	5.46448	2.73224	6.55738	3.27869	5.46448	5.46448	13.1148	1.63934	4.37158	4.37158	4.91803	3.82514	11.4754	2.73224	6.01093	1.0929	2.18579	183
ENSSSA1UGT002351	5.05796	4.84721	3.68809	3.68809	6.32244	3.89884	4.21496	6.00632	3.68809	9.90516	1.15911	4.53109	4.53109	2.8451	8.85142	11.275	3.58272	5.47945	3.16122	3.2666	949
ENSSSA1UGT002352	4.85437	3.8835	2.91262	4.61165	6.31068	7.52427	5.09709	5.33981	1.45631	7.28155	1.94175	3.15534	8.25243	3.8835	10.9223	7.28155	5.33981	5.09709	2.42718	2.42718	412
ENSSSA1UGT002353	2.77296	4.67938	2.59965	4.15945	6.23917	4.67938	2.94627	7.79896	6.41248	8.66551	1.03986	4.85269	3.98614	3.81282	7.62565	12.9983	5.026	5.19931	1.55979	2.94627	577
ENSSSA1UGT002355	4.46058	1.76349	5.49793	7.98755	2.59336	8.29876	1.97095	6.95021	9.95851	7.67635	2.07469	4.14938	2.28216	4.87552	7.05394	5.49793	4.14938	7.67635	1.86722	3.21577	964
ENSSSA1UGT002356	5.81818	2.54545	4.36364	6.90909	6.54545	4.36364	2.18182	7.63636	6.90909	7.63636	1.45455	4.72727	6.54545	2.90909	4.36364	7.27273	6.90909	5.45455	0.727273	4.72727	275
ENSSSA1UGT002358	6.03097	3.01548	4.23798	6.84597	5.54197	4.64548	3.09698	7.00896	6.76447	10.5949	2.11899	3.83048	3.91198	2.44499	6.03097	7.41646	4.88998	7.17196	1.46699	2.93399	1227
ENSSSA1UGT002360	9.09091	0.699301	2.7972	10.4895	6.29371	6.29371	2.0979	2.0979	6.99301	5.59441	2.0979	2.7972	9.09091	5.59441	6.99301	8.39161	5.59441	5.59441	0	1.3986	143
ENSSSA1UGT002361	6.64865	1.94595	4.37838	6.54054	4.32432	5.94595	3.02703	6.86486	6.91892	11.1892	2.7027	4.10811	4.75676	2.75676	3.89189	8.97297	5.02703	6.05405	1.18919	2.75676	1850
ENSSSA1UGT002363	8.37283	3.94945	3.94945	4.10742	5.37125	7.109	3.47551	5.21327	4.2654	7.74092	2.52765	5.84518	4.73934	2.68562	4.2654	7.58294	6.00316	8.37283	1.10585	3.31754	633
ENSSSA1UGT002364	7.36842	2.10526	1.05263	3.15789	6.31579	3.15789	6.31579	6.31579	2.10526	12.6316	4.21053	3.15789	5.26316	5.26316	4.21053	10.5263	6.31579	6.31579	1.05263	3.15789	95
ENSSSA1UGT002366	6.40097	2.657	4.22705	3.98551	2.657	6.76329	2.89855	4.95169	5.55556	5.67633	1.20773	2.41546	5.91787	2.05314	11.3527	13.0435	9.42029	4.34783	2.17391	2.29469	828
ENSSSA1UGT002367	9.09091	5.30303	5.30303	5.30303	6.81818	3.0303	0.757576	9.09091	9.84848	6.81818	1.51515	5.30303	3.78788	3.0303	4.54545	6.81818	4.54545	4.54545	0.757576	3.78788	132
ENSSSA1UGT002368	5.89319	4.60405	4.78821	4.41989	4.23573	6.99816	3.31492	6.26151	9.02394	6.26151	2.02578	4.41989	3.31492	5.52486	3.8674	7.91897	4.23573	6.07735	2.20994	4.60405	543
ENSSSA1UGT002371	5.29891	1.7663	8.15217	5.57065	5.43478	10.1902	7.06522	2.98913	7.20109	4.8913	0.679348	5.84239	6.92935	0.951087	3.39674	8.96739	4.8913	4.61957	0.815217	4.34783	736
ENSSSA1UGT002372	1.03093	6.18557	3.09278	7.21649	8.24742	4.12371	4.12371	2.06186	8.24742	4.12371	1.03093	5.15464	11.3402	1.03093	8.24742	8.24742	4.12371	6.18557	3.09278	3.09278	97
ENSSSA1UGT002374	8.63095	1.4881	5.35714	5.05952	4.16667	4.46429	2.67857	4.7619	7.44048	10.4167	2.67857	2.08333	3.57143	3.57143	8.03571	6.25	5.95238	6.25	3.27381	3.86905	336
ENSSSA1UGT002376	4.77223	2.60304	5.63991	8.24295	3.68764	10.4121	4.55531	3.03688	2.81996	8.45987	0.21692	1.73536	5.20607	5.63991	12.1475	7.80911	4.12148	5.20607	1.73536	1.95228	461
ENSSSA1UGT002377	5.96491	3.15789	3.50877	5.26316	7.01754	5.61404	3.15789	7.7193	8.42105	10.1754	2.10526	5.61404	4.5614	2.80702	3.15789	6.31579	3.85965	8.77193	0	2.80702	285
ENSSSA1UGT002381	5.66802	3.64372	6.47773	6.07287	4.8583	8.09717	1.21457	3.64372	8.50202	4.04858	2.83401	6.07287	4.45344	4.04858	4.8583	8.90688	6.07287	6.47773	0.809717	3.23887	247
ENSSSA1UGT002383	3.76197	4.58276	6.90834	7.86594	5.33516	3.89877	5.06156	4.37756	8.54993	8.48153	1.70999	4.85636	3.76197	3.62517	4.78796	9.84952	4.65116	5.06156	0.547196	2.32558	1462
ENSSSA1UGT002386	4.21053	4.73684	3.15789	4.60526	7.10526	5.13158	3.81579	4.21053	5.92105	8.28947	0.921053	4.34211	5.13158	3.15789	10.9211	9.60526	5	4.73684	1.57895	3.42105	760
ENSSSA1UGT002388	4.25532	1.89125	5.08274	6.26478	3.6643	5.91017	3.19149	5.67376	7.56501	8.15603	2.83688	3.78251	4.37352	3.78251	6.38298	11.3475	5.79196	6.26478	1.06383	2.71868	846
ENSSSA1UGT002389	4.97788	2.43363	4.5354	7.85398	5.42035	2.21239	1.99115	6.41593	6.74779	14.4912	1.54867	6.30531	2.65487	3.09735	2.54425	11.1726	4.97788	6.30531	0.774336	3.53982	904
ENSSSA1UGT002391	3.73832	3.27103	6.54206	7.00935	4.51713	4.20561	3.11526	4.6729	7.16511	10.4361	1.24611	5.45171	4.6729	2.49221	4.82866	9.34579	6.54206	5.60748	1.40187	3.73832	642
ENSSSA1UGT002393	6.38298	1.77305	5.31915	9.57447	6.02837	2.83688	1.06383	3.90071	11.3475	9.92908	1.06383	6.38298	3.90071	4.25532	5.31915	6.02837	5.31915	4.96454	1.06383	3.5461	282
ENSSSA1UGT002394	3.93013	2.18341	3.40611	6.46288	6.11354	4.19214	2.53275	7.16157	7.33624	10.4803	2.09607	5.76419	4.19214	3.75546	6.0262	8.99563	4.36681	6.89956	0.873362	3.23144	1145
ENSSSA1UGT002396	4.4603	7.49331	4.63872	5.26316	6.33363	5.44157	2.31936	6.51204	6.15522	7.76093	2.31936	6.33363	4.19269	3.83586	3.56824	8.92061	6.06601	4.72792	0.624442	3.03301	1121
ENSSSA1UGT002397	7.76699	0.970874	4.85437	3.8835	3.8835	3.8835	2.91262	4.85437	9.70874	11.6505	6.79612	5.82524	2.91262	2.91262	5.82524	8.73786	4.85437	1.94175	3.8835	1.94175	103
ENSSSA1UGT002399	7.64925	1.30597	7.08955	12.3134	2.42537	4.47761	2.61194	3.54478	12.8731	5.59701	1.6791	3.35821	4.66418	3.54478	6.52985	6.71642	3.73134	3.91791	1.49254	4.47761	536
ENSSSA1UGT002401	3.67893	4.8495	2.00669	3.51171	6.02007	5.68562	2.67559	6.18729	7.19064	9.36455	1.67224	3.67893	3.17726	5.35117	8.19398	9.699	4.34783	6.18729	1.50502	5.01672	598
ENSSSA1UGT002402	2.85714	3.1746	0.952381	3.1746	6.98413	2.53968	4.44444	6.98413	7.30159	10.7937	3.49206	4.12698	6.34921	5.07937	3.1746	9.52381	7.30159	5.71429	2.22222	3.80952	315
ENSSSA1UGT002403	8.33333	4.62963	6.48148	8.33333	3.7037	6.48148	5.55556	6.48148	4.62963	8.33333	0.925926	2.77778	4.62963	4.62963	3.7037	10.1852	0.925926	5.55556	2.77778	0.925926	108
ENSSSA1UGT002405	3.75	5.625	4.16667	3.75	4.16667	4.58333	3.95833	5.625	6.875	7.91667	1.66667	5	2.91667	4.79167	7.08333	14.1667	5.83333	5.20833	0.833333	2.08333	480
ENSSSA1UGT002409	9.20245	1.22699	4.53988	7.11656	2.82209	7.97546	3.31288	3.43558	4.41718	7.23926	0.981595	4.41718	8.34356	4.04908	10.0613	10.184	3.31288	5.88957	0.122699	1.34969	815
ENSSSA1UGT002410	4.47761	3.17164	2.61194	3.35821	5.97015	7.64925	5.97015	3.73134	3.17164	8.95522	1.1194	3.54478	7.27612	3.73134	11.3806	9.32836	4.66418	4.66418	2.23881	2.98507	536
ENSSSA1UGT002411	4.77454	2.38727	3.18302	4.24403	5.30504	6.6313	3.44828	9.01857	7.42706	10.8753	0.530504	5.30504	3.44828	5.03979	5.30504	8.75332	4.77454	5.83554	1.06101	2.65252	377
ENSSSA1UGT002413	4.16058	2.40876	2.48175	4.89051	7.66423	2.9927	2.48175	6.20438	5.54745	12.9927	2.48175	5.76642	5.9854	5.10949	3.43066	11.0949	4.0146	6.86131	0.656934	2.77372	1370
ENSSSA1UGT002414	2.14286	5	1.42857	2.85714	8.57143	2.85714	4.28571	5	2.14286	7.85714	2.14286	5	1.42857	5	12.1429	16.4286	9.28571	3.57143	2.14286	0.714286	140
ENSSSA1UGT002416	4.04372	2.62295	1.31148	2.51366	3.1694	3.27869	2.73224	5.02732	11.1475	11.1475	2.0765	4.48087	3.71585	8.08743	10.929	8.52459	7.54098	4.80874	1.53005	1.31148	915
ENSSSA1UGT002417	4.21546	5.15222	1.40515	2.34192	5.15222	4.91803	3.0445	7.25995	4.91803	11.007	1.63934	2.57611	6.08899	3.0445	4.91803	14.7541	6.32319	4.91803	2.10773	4.21546	427
ENSSSA1UGT002419	3.82166	5.09554	2.54777	6.36943	5.73248	2.54777	0	7.00637	6.36943	8.9172	2.54777	7.64331	6.36943	3.82166	4.4586	10.828	5.73248	6.36943	1.27389	2.54777	157
ENSSSA1UGT002422	3.82166	0.636943	3.82166	6.36943	7.64331	5.09554	3.18471	6.36943	10.1911	8.28025	1.27389	6.36943	5.09554	4.4586	6.36943	5.09554	4.4586	5.73248	3.18471	2.54777	157
ENSSSA1UGT002427	10.989	0.732601	2.9304	5.86081	4.0293	9.15751	2.9304	5.49451	6.22711	9.89011	1.0989	5.86081	2.9304	2.1978	4.3956	6.59341	6.95971	9.89011	0	1.8315	273
ENSSSA1UGT002428	5.6338	1.87793	2.8169	6.10329	4.22535	4.22535	1.40845	10.3286	11.7371	8.4507	2.34742	7.98122	2.8169	3.28638	4.69484	11.2676	2.34742	6.10329	0	2.34742	213
ENSSSA1UGT002434	4.05405	3.4398	4.4226	7.00246	6.87961	3.80835	3.4398	3.6855	6.38821	7.00246	1.84275	4.54545	6.26536	3.9312	6.51106	10.688	5.52826	6.38821	0.859951	3.31695	814
ENSSSA1UGT002438	6.69903	2.91262	3.78641	3.8835	3.1068	8.93204	4.27184	1.94175	3.1068	7.6699	1.06796	1.84466	10.0971	4.27184	12.5243	8.05825	4.46602	7.6699	2.23301	1.45631	1030
ENSSSA1UGT002439	6.89127	1.99081	4.59418	4.90046	3.36907	5.0536	1.22511	5.8193	5.66616	11.026	3.98162	4.90046	3.82848	3.36907	6.12557	7.65697	6.27871	7.96325	0.765697	4.59418	653
ENSSSA1UGT002440	4.97738	1.35747	7.23982	7.23982	4.97738	8.1448	1.35747	5.88235	8.37104	11.086	1.35747	5.20362	2.94118	4.0724	4.0724	7.01357	4.75113	6.33484	0.678733	2.94118	442
ENSSSA1UGT002441	7.78443	2.39521	6.58683	5.98802	3.59281	5.98802	1.79641	11.3772	7.18563	8.98204	1.79641	2.39521	5.38922	4.19162	5.38922	4.19162	2.99401	7.78443	0.598802	3.59281	167
ENSSSA1UGT002444	3.58166	2.22063	1.64756	3.36676	5.51576	3.2235	2.29226	7.87966	8.88252	12.8223	2.93696	5.44413	4.44126	5.22923	5.58739	10.0287	5.30086	5.15759	1.43266	3.0086	1396
ENSSSA1UGT002445	5.2459	2.29508	3.27869	4.69945	4.04372	6.12022	3.82514	5.2459	6.55738	7.54098	1.31148	3.60656	4.69945	6.3388	12.0219	8.96175	6.3388	5.13661	0.983607	1.74863	915
ENSSSA1UGT002447	3.26975	2.0436	5.72207	4.90463	5.72207	5.99455	1.63488	5.44959	7.90191	9.67302	1.90736	3.26975	4.49591	1.22616	7.22071	13.8965	4.76839	5.99455	1.63488	3.26975	734
ENSSSA1UGT002448	7.109	4.9763	2.8436	5.45024	4.9763	4.50237	2.8436	4.2654	4.73934	10.1896	2.36967	4.73934	3.79147	3.31754	8.05687	11.3744	4.9763	6.87204	0.473934	2.1327	422
ENSSSA1UGT002449	5.93668	2.77045	6.46438	5.40897	4.88127	4.35356	2.5066	5.5409	9.76253	8.44327	1.05541	5.67282	4.35356	3.16623	4.88127	9.36675	4.08971	7.25594	0.923483	3.16623	758
ENSSSA1UGT002450	3.9548	1.12994	3.38983	8.47458	11.2994	2.82486	0.564972	7.9096	9.03955	9.03955	1.12994	5.64972	3.9548	2.25989	5.08475	8.47458	3.9548	5.64972	2.82486	3.38983	177
ENSSSA1UGT002452	12.5	3.57143	12.5	7.14286	3.57143	1.78571	0	3.57143	3.57143	10.7143	1.78571	5.35714	5.35714	5.35714	1.78571	7.14286	7.14286	5.35714	0	1.78571	56
ENSSSA1UGT002454	3.76648	6.59134	2.82486	2.44821	6.02637	4.14313	3.01318	6.21469	2.44821	9.4162	1.69492	6.21469	2.25989	5.46139	6.40301	15.8192	4.89642	4.14313	2.44821	3.76648	531
ENSSSA1UGT002458	3.7037	4.2328	0.529101	5.82011	8.99471	5.29101	1.0582	8.99471	7.40741	10.582	1.5873	2.6455	4.2328	2.1164	5.29101	8.99471	4.2328	6.87831	2.6455	4.7619	189
ENSSSA1UGT002459	6.24093	3.33817	4.93469	5.07983	6.09579	3.77358	2.61248	5.95065	8.56313	11.0305	2.61248	4.35414	4.209	3.0479	5.3701	7.25689	5.80552	5.95065	1.59652	2.17707	689
ENSSSA1UGT002460	5	3.80952	2.85714	6.90476	4.28571	8.09524	2.61905	5.71429	5.71429	7.14286	2.14286	6.19048	4.04762	2.38095	5.2381	6.90476	6.42857	8.09524	0.952381	5.47619	420
ENSSSA1UGT002462	3.00481	3.24519	3.24519	3.84615	6.37019	6.25	3.00481	7.21154	7.57212	9.25481	2.16346	5.28846	3.36538	3.60577	6.61058	10.5769	6.37019	4.6875	1.20192	3.125	832
ENSSSA1UGT002467	5.73477	1.79211	4.83871	7.52688	3.94265	5.55556	1.43369	4.12186	5.73477	8.24373	0.896057	5.73477	8.42294	1.43369	10.0358	10.5735	3.04659	6.09319	1.07527	3.76344	558
ENSSSA1UGT002471	3.00578	1.84971	3.23699	4.04624	7.05202	3.69942	2.54335	7.63006	6.93642	11.5607	2.65896	5.66474	4.62428	3.12139	5.66474	9.13295	4.9711	6.82081	2.08092	3.69942	865
ENSSSA1UGT002472	5.51302	4.13476	1.37825	3.21593	3.98162	3.67534	3.06279	3.82848	4.90046	8.26953	1.53139	3.06279	8.11639	2.14395	9.49464	13.4763	9.03522	4.59418	2.14395	4.44104	653
ENSSSA1UGT002476	6.16383	3.40633	3.64964	3.97405	7.38037	2.51419	4.94728	5.75831	9.57015	9.40795	2.10868	6.08273	4.37956	2.5953	4.05515	9.00243	5.515	5.59611	0.648824	3.24412	1233
ENSSSA1UGT002477	6.52174	1.44928	2.89855	10.1449	5.07246	2.89855	2.17391	5.7971	11.5942	15.2174	2.17391	2.89855	3.62319	3.62319	2.89855	7.24638	3.62319	4.34783	0.724638	5.07246	138
ENSSSA1UGT002479	5.24152	1.54162	5.44707	5.24152	4.9332	4.31655	2.0555	7.19424	9.66084	11.0997	1.02775	5.7554	5.24152	3.08325	5.85817	8.01644	4.9332	4.9332	1.54162	2.8777	973
ENSSSA1UGT002481	5.49451	2.74725	2.74725	2.74725	12.0879	4.3956	2.1978	8.79121	4.3956	14.8352	1.0989	3.84615	4.94505	3.84615	1.0989	9.34066	3.84615	7.14286	3.2967	1.0989	182
ENSSSA1UGT002483	6.40704	2.63819	3.76884	4.14573	5.02513	7.03518	6.03015	5.65327	4.64824	7.66332	0.376884	3.01508	5.77889	4.8995	12.4372	7.66332	4.27136	5.40201	0.879397	2.26131	796
ENSSSA1UGT002489	3.51673	4.02723	4.53772	5.89904	6.63642	3.85706	2.26886	6.92002	8.39478	10.9472	1.47476	5.2751	4.31083	3.06296	4.481	8.28134	4.93477	6.40953	0.964265	3.80034	1763
ENSSSA1UGT002491	3.84615	2.74725	2.1978	6.04396	2.74725	2.74725	2.1978	8.24176	6.59341	13.1868	3.84615	6.04396	2.74725	5.49451	3.84615	13.1868	4.94505	4.3956	2.1978	2.74725	182
ENSSSA1UGT002492	4.83193	5.67227	1.68067	4.20168	3.78151	5.2521	3.78151	2.94118	3.9916	12.8151	1.2605	2.31092	6.30252	5.2521	9.45378	14.7059	4.20168	2.94118	2.10084	2.52101	476
ENSSSA1UGT002494	3.76068	4.2735	6.15385	7.00855	3.58974	4.44444	2.73504	3.4188	9.91453	7.86325	3.07692	4.10256	4.95726	3.58974	7.52137	8.37607	5.64103	5.12821	1.02564	3.4188	585
ENSSSA1UGT002499	6.38298	2.12766	8.51064	3.40426	7.23404	4.25532	1.2766	6.38298	6.80851	9.78723	3.40426	6.38298	5.95745	3.40426	4.68085	4.25532	5.10638	5.53191	0.425532	4.68085	235
ENSSSA1UGT002504	3.96601	5.09915	3.11615	2.54958	7.36544	4.24929	2.26629	5.66572	4.81586	13.0312	3.68272	5.09915	5.09915	5.94901	5.38244	7.36544	4.24929	5.38244	1.69972	3.96601	353
ENSSSA1UGT002507	7.44417	0.992556	6.94789	6.94789	2.97767	3.97022	2.72953	3.97022	9.92556	8.933	0.992556	5.7072	4.4665	3.97022	6.45161	9.67742	4.4665	4.96278	0.744417	3.72208	403
ENSSSA1UGT002509	1.38889	0	11.1111	1.38889	13.8889	11.1111	2.77778	1.38889	4.16667	12.5	2.77778	1.38889	1.38889	6.94444	1.38889	11.1111	2.77778	11.1111	1.38889	0	72
ENSSSA1UGT002510	2.8125	5.9375	2.5	5.625	7.1875	6.5625	3.4375	6.25	6.875	7.5	0.625	6.5625	4.375	3.4375	8.4375	9.6875	3.125	3.4375	0.625	5	320
ENSSSA1UGT002512	4.58891	2.67686	4.97132	6.78776	5.54493	3.25048	1.81644	6.78776	8.03059	11.7591	2.48566	4.3021	4.78011	3.25048	4.97132	9.65583	5.25813	5.54493	0.956023	2.58126	1046
ENSSSA1UGT002513	5.88235	0.379507	6.07211	13.6622	1.51803	3.22581	0.948767	3.79507	13.6622	12.5237	2.08729	4.93359	1.51803	4.93359	6.26186	11.0057	3.22581	3.60531	0	0.759013	527
ENSSSA1UGT002514	6.44096	2.60116	3.26177	4.45912	3.05533	3.88109	2.89017	5.53262	7.14286	12.2626	3.17919	4.5417	4.17011	5.36746	7.14286	9.455	6.27581	4.99587	1.61024	1.7341	2422
ENSSSA1UGT002516	7.17629	1.87207	7.17629	5.14821	4.36817	5.92824	3.43214	6.39626	6.08424	7.4883	2.02808	6.08424	8.42434	4.36817	4.36817	5.46022	4.83619	4.83619	2.65211	1.87207	641
ENSSSA1UGT002517	5.74949	1.64271	3.08008	7.18686	4.31211	7.18686	2.46407	7.18686	9.65092	11.9097	1.84805	5.54415	4.72279	2.05339	3.90144	7.18686	3.90144	7.59754	0.616016	2.25873	487
ENSSSA1UGT002527	7.10974	3.86399	2.00927	2.47295	3.86399	5.56414	2.62751	3.24575	2.78207	8.96445	1.5456	2.78207	8.80989	2.93663	8.80989	14.6832	9.11901	4.48223	1.85471	2.47295	647
ENSSSA1UGT002528	4.40495	1.62287	6.1051	6.02782	2.62751	8.11437	3.09119	5.64142	4.9459	7.88253	2.31839	8.19165	5.3323	3.70943	4.9459	8.50077	5.87326	6.64606	0.695518	3.32303	1294
ENSSSA1UGT002529	7.64588	1.00604	3.82294	4.22535	3.42052	5.93561	2.41449	4.02414	4.32596	9.45674	2.21328	4.22535	6.43863	3.01811	7.64588	10.8652	5.33199	8.95372	1.50905	3.52113	994
ENSSSA1UGT002530	5.23691	4.2394	3.2419	3.99002	3.74065	4.73815	0.997506	5.73566	10.2244	6.23441	0.74813	5.73566	2.74314	5.48628	12.7182	10.7232	5.98504	3.2419	2.24439	1.99501	401
ENSSSA1UGT002531	4.25273	6.19684	2.06561	3.88821	6.56136	4.25273	3.88821	4.86027	5.95383	7.89793	1.45808	4.73876	4.37424	4.00972	8.14095	13.3657	4.73876	4.98177	1.21507	3.15917	823
ENSSSA1UGT002532	3.94022	1.90217	3.80435	5.43478	7.33696	3.66848	3.53261	6.65761	5.16304	10.462	2.71739	5.43478	4.34783	5.84239	7.33696	6.92935	2.98913	7.20109	1.49457	3.80435	736
ENSSSA1UGT002533	4.20561	0.778816	7.16511	10.1246	4.04984	2.49221	1.24611	5.45171	12.4611	10.5919	1.40187	4.6729	6.07477	2.9595	4.04984	9.65732	4.6729	6.69782	0.311526	0.934579	642
ENSSSA1UGT002537	3.16027	6.99774	2.93454	3.61174	6.54628	4.06321	5.86907	7.44921	5.64334	10.158	0.902935	2.7088	2.7088	3.83747	7.44921	13.7698	1.80587	4.06321	2.93454	3.386	443
ENSSSA1UGT002538	6.94981	3.861	1.9305	7.72201	1.1583	10.4247	0.772201	3.0888	11.1969	4.6332	1.5444	3.0888	7.72201	3.861	8.88031	6.94981	8.49421	5.01931	1.5444	1.1583	259
ENSSSA1UGT002540	6.18557	2.44845	5.41237	4.25258	6.18557	3.86598	2.57732	6.18557	7.86082	12.5	1.93299	5.54124	4.76804	5.02577	3.35052	9.40722	3.86598	6.0567	0.64433	1.93299	776
ENSSSA1UGT002541	4.83871	1.97133	6.63082	5.82437	6.1828	3.58423	3.67384	6.09319	8.06452	9.05018	2.32975	5.73477	4.7491	2.59857	6.36201	6.00358	5.19713	5.82437	0.448029	4.83871	1116
ENSSSA1UGT002543	1.31579	0	10.5263	1.31579	13.1579	7.89474	2.63158	2.63158	7.89474	13.1579	1.31579	2.63158	0	7.89474	2.63158	11.8421	2.63158	9.21053	1.31579	0	76
ENSSSA1UGT002544	5.24476	1.04895	5.24476	7.34266	7.34266	5.24476	3.84615	5.94406	7.69231	8.39161	3.14685	4.8951	5.94406	3.14685	3.4965	7.69231	4.8951	7.34266	0.34965	1.74825	286
ENSSSA1UGT002546	4.00844	2.32068	3.5865	5.27426	6.54008	4.21941	3.5865	6.96203	3.79747	11.8143	1.47679	6.32911	5.27426	4.43038	4.43038	8.64979	4.64135	6.32911	1.26582	5.06329	474
ENSSSA1UGT002549	8.64198	2.91807	3.81594	3.7037	6.17284	6.62177	3.367	4.48934	4.15264	9.20314	1.0101	2.6936	7.74411	4.60157	9.87654	8.41751	3.47924	6.06061	1.12233	1.90797	891
ENSSSA1UGT002550	5.52452	2.35878	3.10366	3.91061	5.46245	5.3383	2.48293	5.46245	4.53135	7.26257	0.869025	3.78647	10.3662	2.97952	5.71074	12.7871	8.00745	5.71074	1.30354	3.04159	1611
ENSSSA1UGT002554	4	9.33333	4	5.33333	5.33333	8	4	5.33333	2.66667	6.66667	1.33333	5.33333	5.33333	4	5.33333	6.66667	2.66667	10.6667	1.33333	2.66667	75
ENSSSA1UGT002555	4.81586	2.9745	4.81586	6.23229	6.65722	3.11615	3.68272	6.79887	9.63173	9.06516	2.12465	3.82436	3.25779	3.11615	6.37394	7.08215	5.38244	6.23229	0.849858	3.96601	706
ENSSSA1UGT002557	10.8108	0.772201	3.861	4.2471	3.861	7.72201	1.9305	6.17761	4.6332	10.8108	1.1583	5.40541	2.3166	3.4749	4.6332	9.65251	6.94981	8.88031	0	2.7027	259
ENSSSA1UGT002561	9.2219	2.59366	6.05187	6.34006	1.72911	4.61095	1.15274	5.4755	4.32277	6.34006	2.30548	4.89914	8.35735	2.30548	4.03458	12.1037	5.4755	9.51009	0.576369	2.59366	347
ENSSSA1UGT002563	5.7211	2.74136	2.14541	3.09893	5.95948	3.81406	2.50298	7.62813	5.84029	12.2765	2.97974	4.17163	3.33731	6.55542	5.95948	8.70083	5.24434	6.43623	1.66865	3.21812	839
ENSSSA1UGT002565	3.67836	2.90847	2.13858	2.22412	4.53379	4.70488	2.65184	7.61334	7.18563	13.858	4.3627	5.73139	4.19162	4.70488	5.64585	7.69889	3.84944	7.95552	1.45423	2.90847	1169
ENSSSA1UGT002566	4.53333	2.13333	2.93333	2.4	3.46667	5.6	2.66667	6.4	3.2	9.06667	1.6	2.4	6.4	2.4	12.2667	15.7333	11.4667	2.13333	2.13333	1.06667	375
ENSSSA1UGT002570	4.41176	0.980392	3.43137	11.2745	4.90196	8.33333	1.47059	4.90196	7.35294	9.80392	3.92157	2.94118	4.90196	3.43137	3.43137	6.37255	5.39216	8.33333	0	4.41176	204
ENSSSA1UGT002574	4.13005	4.21793	4.04218	3.86643	6.23902	4.56942	3.86643	5.88752	5.27241	10.0176	0.878735	5.18453	5.09666	2.72408	8.87522	10.3691	4.83304	6.06327	1.05448	2.81195	1138
ENSSSA1UGT002577	7.2	0	1.6	1.6	1.6	12.8	0	3.2	7.2	8	4	9.6	15.2	3.2	4	12	5.6	3.2	0	0	125
ENSSSA1UGT002578	7.65306	4.08163	2.04082	2.55102	2.55102	5.10204	2.04082	5.10204	3.06122	7.65306	1.02041	2.55102	5.61224	4.59184	15.8163	13.2653	5.61224	3.57143	5.10204	1.02041	196
ENSSSA1UGT002581	5.69231	4.61538	2.30769	3.38462	4.76923	5.53846	2.46154	5.84615	5.07692	8.76923	1.23077	3.38462	4	5.07692	9.38462	9.84615	8.61538	5.53846	2	2.46154	650
ENSSSA1UGT002584	2.73973	2.52898	2.52898	3.68809	6.00632	2.8451	3.79347	8.21918	7.37619	10.9589	2.00211	5.58483	3.58272	4.42571	5.79557	12.0126	6.21707	5.79557	1.47524	2.4236	949
ENSSSA1UGT002586	8.14229	1.18577	4.03162	6.16601	3.00395	4.03162	2.37154	8.4585	8.93281	9.16996	1.58103	5.29644	5.8498	3.47826	5.61265	6.24506	7.03557	4.98024	0.948617	3.47826	1265
ENSSSA1UGT002588	6.40394	2.46305	4.18719	4.6798	5.17241	9.1133	1.97044	6.7734	5.17241	10.3448	2.95567	2.70936	6.40394	2.46305	4.55665	8.74384	4.92611	6.15764	2.21675	2.58621	812
ENSSSA1UGT002592	5.99022	3.05623	4.15648	4.52323	5.50122	4.76773	1.83374	7.21271	4.03423	11.0024	3.05623	4.27873	4.27873	3.42298	6.35697	8.80196	4.52323	7.21271	1.71149	4.27873	818
ENSSSA1UGT002598	3.74101	3.30935	3.59712	6.61871	5.17986	4.89209	3.02158	6.04317	7.19424	9.35252	2.01439	6.18705	4.7482	4.17266	5.03597	9.20863	4.02878	7.05036	1.58273	3.02158	695
ENSSSA1UGT002599	5.21512	2.47718	2.21643	5.47588	9.12647	2.60756	3.52021	7.1708	6.5189	12.2555	1.95567	4.30248	5.08475	2.73794	6.64928	7.69231	6.77966	4.04172	0.912647	3.25945	767
ENSSSA1UGT002600	5.10949	2.26277	6.13139	7.0073	3.94161	4.52555	1.82482	5.9854	8.24818	10.438	2.26277	5.32847	4.89051	3.86861	5.10949	8.75912	4.16058	5.47445	0.729927	3.94161	1370
ENSSSA1UGT002601	4.48718	6.41026	2.5641	3.84615	7.69231	2.5641	4.48718	5.12821	2.5641	12.1795	0.641026	7.05128	5.12821	2.5641	9.61538	8.97436	4.48718	3.20513	2.5641	3.84615	156
ENSSSA1UGT002602	3.37691	4.13943	4.13943	3.05011	5.77342	5.22876	5.55556	6.64488	5.11983	9.69499	1.30719	3.81264	3.26797	2.61438	9.25926	10.3486	5.22876	5.77342	2.06972	3.59477	918
ENSSSA1UGT002603	3.78657	5.67986	2.75387	2.23752	8.26162	3.78657	4.13081	6.71256	4.30293	5.50775	1.54905	6.36833	3.95869	3.95869	7.0568	12.5645	5.85198	4.47504	1.0327	6.0241	581
ENSSSA1UGT002606	4.10959	9.58904	4.10959	2.73973	4.10959	12.3288	4.10959	5.47945	0	6.84932	1.36986	5.47945	1.36986	1.36986	6.84932	10.9589	4.10959	10.9589	2.73973	1.36986	73
ENSSSA1UGT002607	6.33803	1.40845	4.22535	4.92958	4.22535	3.52113	1.40845	7.04225	7.04225	15.493	2.11268	7.04225	2.8169	4.22535	4.22535	8.4507	3.52113	10.5634	0	1.40845	142
ENSSSA1UGT002608	5.78158	2.71235	1.99857	4.1399	6.63812	5.28194	3.92577	4.35403	5.85296	9.99286	1.78444	4.63954	5.63883	3.85439	8.06567	10.9921	4.06852	6.42398	1.21342	2.64097	1401
ENSSSA1UGT002609	6.8836	3.25407	4.25532	6.50814	3.62954	10.388	3.37922	2.8786	4.8811	6.00751	1.12641	3.87985	4.00501	5.38173	9.7622	9.88736	3.75469	5.7572	2.12766	2.25282	799
ENSSSA1UGT002611	4.7153	3.64769	3.02491	4.4484	4.62633	6.40569	2.84698	4.98221	4.53737	9.1637	0.88968	3.91459	4.98221	4.4484	11.7438	10.0534	5.96085	5.33808	1.42349	2.84698	1124
ENSSSA1UGT002618	4.88959	4.73186	3.94322	4.25868	5.20505	8.35962	2.99685	3.47003	3.62776	7.41325	0.315457	2.68139	6.62461	4.88959	13.8801	10.4101	4.73186	4.57413	1.1041	1.89274	634
ENSSSA1UGT002621	6.29047	1.75763	4.99537	3.33025	4.62535	6.6605	1.85014	6.01295	6.10546	8.69565	2.22017	5.2729	5.55042	5.2729	6.84551	6.56799	5.82794	8.0481	0.925069	3.14524	1081
ENSSSA1UGT002624	5.14286	5.14286	4.11429	4.22857	6.85714	3.77143	3.42857	5.6	6.17143	12.2286	2.05714	5.25714	3.54286	4.11429	5.37143	9.14286	4.8	5.71429	0.8	2.51429	875
ENSSSA1UGT002634	2.6616	2.28137	1.52091	3.42205	3.80228	3.42205	2.6616	3.42205	8.36502	12.9278	4.94297	4.18251	6.46388	6.46388	6.84411	9.12548	7.98479	4.56274	3.04183	1.90114	263
ENSSSA1UGT002636	5.39773	1.13636	4.82955	5.39773	4.54545	3.97727	2.27273	7.67045	5.68182	12.7841	1.42045	4.82955	4.82955	4.26136	3.97727	7.38636	5.68182	7.38636	2.27273	4.26136	352
ENSSSA1UGT002637	5.97826	0	3.80435	3.80435	8.15217	4.8913	1.08696	7.06522	7.06522	11.9565	2.71739	2.71739	7.06522	4.34783	5.43478	8.69565	7.6087	3.26087	0.543478	3.80435	184
ENSSSA1UGT002639	7.23684	1.31579	2.63158	2.63158	7.23684	9.21053	1.97368	8.55263	6.57895	9.21053	4.60526	3.28947	3.94737	2.63158	5.26316	4.60526	6.57895	5.92105	1.31579	5.26316	152
ENSSSA1UGT002640	1.51515	0.252525	4.54545	2.77778	8.08081	6.81818	1.26263	3.28283	9.34343	10.8586	1.51515	2.27273	9.59596	2.52525	7.82828	5.05051	9.59596	11.3636	0.757576	0.757576	396
ENSSSA1UGT002641	4.09357	4.67836	2.92398	5.55556	4.09357	3.80117	4.67836	6.72515	4.67836	4.97076	1.16959	6.14035	4.67836	4.38596	8.77193	11.9883	6.14035	2.63158	2.33918	5.55556	342
ENSSSA1UGT002644	4.20032	3.06947	1.93861	2.74637	6.13893	4.36187	3.06947	5.33118	6.62359	10.1777	2.74637	3.87722	5.65428	3.06947	8.07754	10.3393	7.75444	5.33118	2.58481	2.90792	619
ENSSSA1UGT002647	6.09579	1.45138	3.0479	5.07983	3.77358	4.93469	2.61248	9.14369	6.38607	9.28882	1.1611	6.5312	7.40203	4.49927	5.66038	6.82148	7.69231	4.78955	0.725689	2.90276	689
ENSSSA1UGT002648	1.38889	9.72222	2.77778	2.77778	4.16667	12.5	2.77778	4.16667	4.16667	8.33333	2.77778	9.72222	1.38889	2.77778	2.77778	8.33333	4.16667	12.5	1.38889	1.38889	72
ENSSSA1UGT002649	3.76344	3.22581	3.76344	5.91398	7.52688	2.68817	5.37634	8.60215	5.91398	11.2903	1.6129	6.45161	4.83871	3.22581	4.30108	3.76344	4.83871	6.45161	1.6129	4.83871	186
ENSSSA1UGT002651	4.60251	1.67364	5.75314	7.84519	2.82427	7.63598	2.09205	5.75314	9.30962	8.3682	2.40586	3.66109	2.51046	5.23013	8.05439	4.91632	3.76569	8.05439	2.30126	3.24268	956
ENSSSA1UGT002652	4.5045	1.8018	3.9039	2.1021	5.40541	3.6036	3.003	9.90991	5.70571	12.3123	0.600601	8.40841	4.2042	3.6036	4.8048	10.5105	4.5045	5.10511	1.2012	4.8048	333
ENSSSA1UGT002654	4.31034	2.29885	1.86782	3.87931	6.6092	3.87931	2.72989	7.47126	4.88506	11.2069	2.72989	5.17241	4.31034	4.31034	8.18966	11.2069	6.6092	3.73563	2.15517	2.44253	696
ENSSSA1UGT002655	4.74453	4.0146	1.82482	3.46715	5.65693	5.83942	4.56204	5.65693	5.65693	10.219	1.82482	3.28467	3.83212	4.92701	6.93431	10.7664	4.74453	5.29197	2.37226	4.37956	548
ENSSSA1UGT002657	4.84262	2.66344	2.42131	4.72155	7.86925	3.1477	3.5109	7.62712	7.14286	14.1646	2.7845	4.23729	3.75303	4.47942	4.84262	8.35351	4.60048	4.60048	1.57385	2.66344	826
ENSSSA1UGT002662	5.91716	2.66272	8.87574	3.84615	4.73373	10.6509	4.73373	2.66272	3.5503	5.6213	0.887574	2.66272	5.6213	6.21302	14.7929	5.02959	5.91716	2.66272	0.591716	2.36686	338
ENSSSA1UGT002663	5.47264	2.18905	2.28856	2.28856	6.56716	3.58209	3.08458	6.26866	9.85075	10.9453	2.38806	4.57711	5.27363	4.47761	7.36318	7.8607	5.17413	4.67662	1.79104	3.8806	1005
ENSSSA1UGT002664	10.9278	1.85567	4.3299	5.97938	3.91753	5.7732	2.26804	3.09278	7.01031	8.45361	1.64948	4.12371	5.15464	1.64948	4.53608	7.62887	5.7732	9.27835	1.23711	5.36082	485
ENSSSA1UGT002665	6.22951	2.78689	3.27869	4.42623	7.21311	4.7541	2.13115	6.88525	6.39344	11.4754	1.63934	4.59016	2.95082	2.62295	5.2459	11.6393	5.08197	5.2459	0.983607	4.42623	610
ENSSSA1UGT002667	3.37739	3.01028	1.98238	2.0558	3.96476	3.37739	4.03818	6.31424	7.04846	14.7577	3.67107	3.81791	5.1395	6.38767	6.60793	9.32452	6.31424	5.50661	1.76211	1.54185	1362
ENSSSA1UGT002669	5.44983	0.432526	4.49827	14.4464	1.90311	1.90311	0.951557	4.67128	12.2837	12.7163	2.33564	4.58478	1.55709	5.79585	7.17993	9.34256	4.06574	3.97924	0.346021	1.55709	1156
ENSSSA1UGT002671	4.81481	3.51852	2.77778	6.48148	6.66667	5.18519	2.22222	7.59259	3.88889	10.7407	4.07407	3.33333	3.7037	3.7037	5.74074	9.25926	4.44444	6.85185	1.2963	3.7037	540
ENSSSA1UGT002672	6.6874	2.64386	3.11042	4.51011	5.9098	6.6874	3.42146	5.28771	4.82115	12.1306	1.71073	2.64386	4.19907	4.35459	8.39813	6.37636	5.9098	6.22084	1.55521	3.42146	643
ENSSSA1UGT002675	7.69231	1.48883	6.69975	6.45161	3.47395	10.4218	2.72953	6.69975	6.94789	8.933	1.73697	4.4665	4.21836	3.97022	5.45906	4.21836	4.96278	6.45161	0.744417	2.23325	403
ENSSSA1UGT002676	5.63003	2.68097	2.41287	5.63003	4.55764	4.02145	3.21716	5.09383	6.16622	10.7239	2.41287	5.36193	7.23861	3.75335	8.0429	11.2601	5.09383	4.02145	1.07239	1.60858	373
ENSSSA1UGT002678	5.93081	3.13015	3.95387	4.94234	3.78913	5.76606	0.823723	5.43657	4.44811	9.06096	1.4827	5.27183	6.2603	3.29489	7.743	8.89621	10.7084	5.93081	1.31796	1.81219	607
ENSSSA1UGT002679	3.97878	2.65252	3.18302	9.01857	3.97878	6.36605	1.59151	5.03979	6.1008	8.48806	3.18302	3.97878	6.36605	2.91777	7.69231	8.22281	6.36605	7.42706	1.32626	2.12202	377
ENSSSA1UGT002681	2.58126	3.72849	1.43403	3.34608	9.75143	2.29446	3.25048	8.03059	8.2218	11.7591	2.29446	5.35373	3.72849	4.1109	4.78011	9.65583	6.11855	5.25813	1.05163	3.25048	1046
ENSSSA1UGT002682	12.3077	9.23077	1.53846	3.07692	9.23077	12.3077	1.53846	3.07692	1.53846	6.15385	3.07692	4.61538	6.15385	4.61538	1.53846	7.69231	4.61538	4.61538	0	3.07692	65
ENSSSA1UGT002683	5.77838	1.63154	4.96261	6.59415	3.60299	4.41876	2.31135	7.61387	10.3331	8.90551	1.76751	5.84636	4.69069	4.2828	4.89463	6.7981	6.05031	4.82665	1.01971	3.67097	1471
ENSSSA1UGT002684	3.8835	4.85437	2.91262	3.8835	8.73786	4.85437	2.91262	1.94175	8.73786	9.70874	0.970874	5.82524	4.85437	3.8835	6.79612	6.79612	5.82524	7.76699	1.94175	2.91262	103
ENSSSA1UGT002691	7.37834	1.20356	4.13396	6.17478	3.663	3.03506	1.62219	5.12821	5.49451	8.73888	2.51177	6.54108	7.32601	7.01204	3.03506	10.5181	6.12245	4.55259	0.732601	5.07588	1911
ENSSSA1UGT002697	3.0303	5.10367	3.18979	3.98724	5.90112	7.33652	5.10367	5.58214	4.94418	10.0478	0.478469	2.55183	5.90112	4.30622	7.97448	8.61244	5.90112	4.30622	1.91388	3.82775	627
ENSSSA1UGT002700	3.87722	2.90792	1.77706	6.78514	6.78514	4.84653	2.10016	5.49273	5.16963	9.36995	1.13086	5.81583	3.71567	6.13893	8.5622	10.0162	6.13893	4.84653	1.29241	3.23102	619
ENSSSA1UGT002701	7.23684	1.31579	2.63158	2.63158	7.23684	9.21053	1.97368	8.55263	6.57895	9.21053	4.60526	3.28947	3.94737	2.63158	5.26316	4.60526	6.57895	5.92105	1.31579	5.26316	152
ENSSSA1UGT002709	5.33854	2.53906	3.25521	3.58073	3.58073	7.61719	4.7526	3.77604	2.73438	9.96094	1.36719	2.86458	10.2865	5.20833	12.1745	6.83594	4.55729	4.6875	1.69271	3.1901	1536
ENSSSA1UGT002712	3.64742	3.03951	2.73556	1.82371	5.47112	3.03951	3.64742	8.81459	4.86322	12.766	3.95137	4.86322	4.55927	5.47112	2.73556	10.6383	8.51064	6.68693	0.607903	2.12766	329
ENSSSA1UGT002716	4.94792	2.08333	4.6875	8.59375	4.94792	4.6875	2.34375	5.98958	6.51042	11.7188	3.125	4.42708	3.90625	3.38542	6.51042	5.72917	4.94792	5.72917	1.30208	4.42708	384
ENSSSA1UGT002719	6.09756	3.20122	2.13415	3.96341	2.89634	4.72561	1.52439	4.87805	4.26829	6.25	1.37195	2.59146	7.0122	3.20122	15.5488	11.4329	8.53659	6.25	2.28659	1.82927	656
ENSSSA1UGT002725	4.63576	5.96026	3.97351	7.94702	1.98675	5.96026	3.97351	7.94702	6.62252	5.29801	2.64901	8.60927	5.29801	3.31126	7.28477	5.29801	3.97351	7.28477	0.662252	1.3245	151
ENSSSA1UGT002726	4.82759	2.41379	3.44828	6.2069	5.17241	6.2069	3.44828	8.96552	8.62069	8.27586	1.37931	8.27586	4.13793	2.75862	2.41379	8.96552	3.7931	7.93103	0.344828	2.41379	290
ENSSSA1UGT002728	10.7692	9.23077	4.61538	0	6.15385	12.3077	1.53846	4.61538	1.53846	7.69231	4.61538	4.61538	6.15385	7.69231	1.53846	4.61538	7.69231	1.53846	1.53846	1.53846	65
ENSSSA1UGT002729	4.19948	2.3622	1.5748	2.3622	9.18635	2.3622	3.67454	8.13648	7.87402	11.0236	3.41207	4.98688	1.31234	3.67454	4.19948	11.5486	4.98688	8.13648	0.524934	4.46194	381
ENSSSA1UGT002731	5.31136	1.8315	3.84615	4.7619	5.67766	6.41026	3.84615	5.49451	6.41026	10.6227	1.0989	4.7619	5.12821	3.2967	4.7619	8.60806	6.59341	4.7619	2.01465	4.7619	546
ENSSSA1UGT002732	5.55556	3.94737	3.36257	3.94737	4.67836	4.53216	4.38596	3.80117	3.94737	10.5263	1.31579	3.50877	4.82456	6.14035	8.04094	13.4503	4.67836	4.67836	1.90058	2.77778	684
ENSSSA1UGT002734	4.74061	1.9678	6.70841	6.08229	6.26118	3.66726	3.75671	5.9034	7.69231	8.94454	2.50447	5.9034	4.83005	2.59392	6.35063	5.9034	5.09839	5.9034	0.536673	4.65116	1118
ENSSSA1UGT002735	3.10559	6.41822	2.27743	2.48447	8.07453	3.31263	2.69151	7.03934	6.8323	10.766	1.24224	4.7619	2.89855	4.7619	5.7971	11.8012	5.38302	4.55487	2.07039	3.72671	483
ENSSSA1UGT002736	8.94309	1.89702	5.14905	3.25203	2.71003	6.50407	5.96206	2.43902	4.87805	7.58808	5.14905	4.33604	6.50407	5.69106	5.14905	12.1951	3.79404	2.16802	0.542005	5.14905	369
ENSSSA1UGT002737	3.73832	1.63551	5.49065	4.20561	7.8271	6.54206	2.57009	5.95794	7.71028	8.76168	2.57009	4.32243	4.20561	3.97196	6.65888	8.06075	4.08879	6.89252	1.16822	3.6215	856
ENSSSA1UGT002738	3.84123	1.66453	4.9936	5.12164	6.14597	4.73752	2.94494	6.53009	6.65813	11.5237	2.8169	4.86556	3.45711	3.71319	5.12164	8.06658	5.12164	6.91421	1.15237	4.60948	781
ENSSSA1UGT002742	3.64964	3.40633	2.18978	2.91971	6.32603	3.40633	2.18978	9.97567	6.32603	12.6521	0.486618	4.86618	3.64964	4.62287	8.75912	10.9489	5.83942	4.62287	1.70316	1.45985	411
ENSSSA1UGT002743	4.03557	2.53078	3.35157	6.70315	6.22435	3.62517	1.77839	5.06156	9.98632	12.8591	1.91518	4.92476	4.17237	4.30917	5.12996	9.09713	5.54036	5.60876	0.820793	2.32558	1462
ENSSSA1UGT002744	6.17284	1.23457	6.17284	7.09877	4.62963	4.62963	1.23457	6.79012	5.8642	11.1111	1.85185	3.7037	5.8642	4.32099	8.02469	4.62963	4.62963	5.8642	1.54321	4.62963	324
ENSSSA1UGT002745	4.69484	2.34742	4.22535	2.34742	8.4507	1.40845	6.57277	6.57277	4.69484	10.3286	1.87793	4.69484	6.57277	5.16432	5.16432	8.92019	7.04225	5.6338	1.40845	1.87793	213
ENSSSA1UGT002746	4.53401	2.93871	2.93871	4.36608	6.46516	5.4576	3.02267	5.87741	5.54156	9.65575	2.60285	4.95382	4.36608	3.94626	6.29723	8.81612	4.86986	7.80856	0.923594	4.61797	1191
ENSSSA1UGT002747	3.36907	0.765697	6.89127	6.27871	7.04441	3.98162	3.36907	6.27871	8.11639	11.026	3.06279	4.2879	4.59418	2.90965	4.13476	7.81011	5.66616	6.43185	0.306279	3.67534	653
ENSSSA1UGT002748	4.39684	2.70575	6.5389	7.44081	6.31342	3.15671	3.83315	6.65163	8.90643	7.89177	2.02931	6.08794	3.94589	3.94589	4.8478	5.07328	5.29876	5.29876	0.338219	5.29876	887
ENSSSA1UGT002752	4.63918	0	7.21649	9.27835	2.06186	3.09278	2.57732	5.6701	10.8247	9.79381	3.09278	5.15464	2.57732	4.63918	8.24742	6.18557	3.60825	7.21649	2.06186	2.06186	194
ENSSSA1UGT002753	6.25652	2.08551	1.2513	1.87696	2.39833	5.42231	2.29406	4.48384	4.27529	7.71637	1.6684	2.81543	7.71637	4.17101	12.2002	11.5746	12.2002	4.90094	2.71116	1.98123	959
ENSSSA1UGT002754	4.75059	2.61283	2.49406	3.91924	5.81948	3.20665	2.019	7.24466	6.7696	10.8076	0.950119	6.05701	5.58195	3.68171	7.60095	10.9264	7.12589	4.86936	1.42518	2.13777	842
ENSSSA1UGT002756	6.64395	2.89608	2.89608	4.59966	5.11073	6.81431	4.94037	3.40716	4.25894	8.34753	0.340716	2.55537	9.19932	5.79216	12.7768	6.81431	3.57751	5.45145	0.681431	2.89608	587
ENSSSA1UGT002758	9.53488	3.25581	3.95349	5.81395	3.95349	10	3.25581	2.7907	3.25581	8.13953	0.232558	1.62791	7.67442	3.25581	12.7907	10	3.02326	5.5814	0.930233	0.930233	430
ENSSSA1UGT002762	4.17827	1.94986	3.34262	8.6351	10.3064	4.45682	2.22841	6.12813	6.40669	9.7493	1.94986	4.17827	4.73538	4.17827	3.89972	6.96379	5.84958	8.07799	0.835655	1.94986	359
ENSSSA1UGT002764	5.38813	3.10502	1.55251	2.6484	5.2968	4.56621	3.47032	4.74886	5.93607	10.137	2.6484	3.379	5.20548	3.0137	8.76712	13.0594	6.57534	5.6621	1.82648	3.0137	1095
ENSSSA1UGT002768	4.14508	5.44041	2.84974	2.84974	4.66321	3.62694	3.10881	6.47668	5.69948	8.80829	0.777202	6.99482	3.62694	6.47668	7.51295	10.1036	5.44041	4.40415	4.14508	2.84974	386
ENSSSA1UGT002770	5.54054	1.48649	4.86486	7.43243	5.40541	6.08108	3.37838	6.21622	7.2973	10.2703	1.89189	3.64865	3.78378	2.83784	5.81081	7.7027	5.13514	6.89189	0.810811	3.51351	740
ENSSSA1UGT002773	11.1111	1.11111	1.11111	5.55556	2.22222	10	3.33333	2.22222	5.55556	8.88889	2.22222	2.22222	5.55556	1.11111	13.3333	6.66667	5.55556	7.77778	0	4.44444	90
ENSSSA1UGT002774	3.20197	2.70936	1.47783	3.20197	6.40394	2.46305	2.95567	8.867	8.12808	12.8079	2.70936	5.41872	3.69458	3.69458	4.6798	11.0837	5.41872	5.66502	1.97044	3.44828	406
ENSSSA1UGT002778	4.64396	2.55418	1.08359	3.09598	2.94118	3.32817	3.17337	6.34675	8.12693	13.9319	4.87616	4.48916	4.10217	5.57276	6.34675	8.59133	6.88854	6.42415	0.851393	2.63158	1292
ENSSSA1UGT002779	5.7903	1.56495	4.53834	6.57277	5.6338	6.25978	2.66041	6.57277	7.04225	10.7981	3.28638	4.53834	5.16432	1.56495	5.32081	6.25978	3.44288	7.19875	1.87793	3.91236	639
ENSSSA1UGT002781	6.89655	2.0214	3.32937	3.9239	5.11296	8.56124	2.0214	6.77765	3.56718	12.1284	2.49703	3.09156	6.06421	3.32937	4.51843	8.56124	5.23187	8.20452	1.78359	2.37812	841
ENSSSA1UGT002782	4.77612	9.55224	5.97015	7.46269	5.07463	6.26866	3.58209	5.07463	9.55224	2.98507	1.19403	3.28358	2.68657	2.38806	5.67164	6.26866	8.0597	5.07463	1.79104	3.28358	335
ENSSSA1UGT002784	4.7817	1.2474	5.19751	5.61331	2.7027	3.3264	2.7027	4.7817	4.9896	8.31601	2.9106	3.9501	7.48441	6.65281	8.31601	12.6819	4.5738	6.65281	1.4553	1.6632	481
ENSSSA1UGT002785	5.8011	2.48619	4.97238	4.97238	3.59116	4.97238	3.03867	6.07735	7.18232	8.56354	1.38122	4.69613	4.14365	3.8674	6.35359	8.28729	7.45856	7.45856	1.38122	3.31492	362
ENSSSA1UGT002788	4	5	1.5	8	6	3.5	4	4	6.5	5.5	2	3	6.5	8	7.5	11	6.5	4	1	2.5	200
ENSSSA1UGT002791	4.03587	2.69058	8.07175	4.03587	5.8296	5.38117	2.69058	6.72646	4.03587	10.3139	2.24215	5.8296	5.8296	4.4843	3.58744	4.4843	6.72646	5.38117	2.24215	5.38117	223
ENSSSA1UGT002792	6.66667	0	3.33333	12.2222	2.22222	1.11111	2.22222	10	6.66667	12.2222	1.11111	4.44444	5.55556	6.66667	6.66667	6.66667	6.66667	5.55556	0	0	90
ENSSSA1UGT002796	5.68862	2.39521	2.39521	5.08982	5.98802	2.69461	2.09581	6.88623	5.08982	8.68263	1.1976	5.38922	3.89222	2.99401	10.7784	10.7784	5.38922	6.88623	1.49701	4.19162	334
ENSSSA1UGT002798	5.74163	2.39234	8.61244	7.6555	2.39234	2.87081	3.34928	7.17703	6.2201	8.61244	2.39234	3.34928	8.13397	5.26316	4.30622	9.09091	4.78469	3.82775	0.956938	2.87081	209
ENSSSA1UGT002799	4.12371	1.85567	5.56701	4.3299	5.15464	4.12371	5.36082	5.56701	3.91753	10.9278	1.64948	4.53608	4.12371	3.50515	2.8866	12.1649	6.18557	7.83505	2.47423	3.71134	485
ENSSSA1UGT002802	1.65746	4.97238	4.41989	4.97238	2.20994	5.52486	3.31492	6.07735	5.52486	9.39227	3.31492	6.62983	2.76243	4.41989	6.07735	6.07735	6.62983	11.0497	1.10497	3.8674	181
ENSSSA1UGT002803	6.89655	2.46305	3.44828	6.40394	1.97044	2.95567	3.44828	3.94089	7.38916	10.8374	4.4335	7.38916	3.94089	5.41872	4.92611	10.3448	2.95567	4.92611	0.492611	5.41872	203
ENSSSA1UGT002806	6.0423	2.26586	2.26586	5.74018	6.79758	6.64653	1.66163	5.58912	5.74018	12.8399	3.77644	3.17221	4.68278	2.56798	4.98489	8.00604	5.74018	5.43807	1.81269	4.22961	662
ENSSSA1UGT002807	6.4	1.6	2.4	8.8	2.4	4.8	2.4	9.6	8.8	8.8	2.4	6.4	4	4	4	4	8	8	0.8	2.4	125
ENSSSA1UGT002811	4.3956	3.07692	2.63736	5.05495	7.69231	6.81319	2.41758	5.71429	6.15385	10.989	2.41758	5.93407	4.3956	4.3956	6.37363	7.47253	5.71429	5.05495	0.879121	2.41758	455
ENSSSA1UGT002814	4.43599	3.04183	0.760456	2.15463	7.35108	2.53485	2.02788	7.47782	7.98479	14.0684	4.30925	6.08365	2.91508	3.29531	4.94297	10.0127	4.81622	5.70342	2.15463	3.92902	789
ENSSSA1UGT002816	6.89655	1.2931	2.58621	3.87931	5.60345	4.31034	4.74138	8.18966	7.32759	10.3448	5.17241	3.87931	2.58621	3.44828	4.74138	10.3448	4.31034	5.17241	1.2931	3.87931	232
ENSSSA1UGT002821	3.00097	5.4211	2.90416	3.09777	6.87318	3.87222	3.77541	6.96999	7.64763	11.7135	1.8393	5.03388	3.00097	3.67861	5.03388	10.8422	3.67861	6.48596	1.16167	3.96902	1033
ENSSSA1UGT002825	2.48175	3.64964	0.875912	3.06569	4.23358	3.21168	2.62774	7.73723	10.073	15.3285	3.35766	4.81752	3.06569	3.35766	6.27737	9.48905	5.40146	5.40146	2.91971	2.62774	685
ENSSSA1UGT002826	5.8011	1.65746	3.03867	4.41989	5.52486	4.97238	3.59116	3.31492	4.14365	12.9834	1.38122	4.69613	7.73481	5.8011	8.01105	5.52486	4.97238	7.45856	1.65746	3.31492	362
ENSSSA1UGT002833	10.119	1.78571	4.7619	6.54762	3.57143	5.95238	4.7619	10.119	5.95238	7.7381	0.595238	0.595238	3.57143	1.78571	4.16667	13.6905	2.97619	4.16667	4.16667	2.97619	168
ENSSSA1UGT002835	4.80641	2.00267	3.60481	4.00534	5.20694	6.67557	2.13618	7.20961	5.8745	10.1469	2.00267	3.87183	4.40587	5.34045	4.27236	8.94526	6.14152	6.00801	2.00267	5.34045	749
ENSSSA1UGT002836	5.75916	1.04712	7.32984	6.28272	4.71204	4.18848	4.18848	3.14136	4.71204	18.8482	3.14136	3.14136	2.09424	5.2356	3.14136	5.75916	6.28272	5.2356	0.52356	5.2356	191
ENSSSA1UGT002837	7.88991	2.75229	2.01835	3.85321	4.0367	7.33945	2.56881	6.42202	4.77064	9.3578	1.65138	2.56881	3.66972	4.22018	10.2752	11.3761	6.6055	5.87156	1.2844	1.46789	545
ENSSSA1UGT002840	2.58621	2.82132	2.27273	3.60502	4.54545	3.44828	3.36991	11.2853	6.81818	11.5204	4.07524	4.38871	2.74295	4.07524	6.73981	9.24765	6.58307	6.42633	1.64577	1.80251	1276
ENSSSA1UGT002841	2.51938	3.29457	3.87597	2.90698	5.81395	4.06977	3.10078	7.17054	8.72093	12.9845	2.51938	4.06977	2.71318	4.65116	6.00775	8.91473	7.55814	4.84496	0.581395	3.68217	516
ENSSSA1UGT002843	5.81242	1.321	3.17041	4.09511	7.66182	4.49141	3.69881	8.45443	5.01982	10.3038	3.03831	5.01982	4.09511	3.69881	4.88771	6.86922	6.73712	6.86922	1.0568	3.69881	757
ENSSSA1UGT002846	5.84795	3.50877	4.67836	2.92398	4.09357	4.09357	4.67836	7.60234	4.67836	8.77193	4.09357	4.09357	4.09357	1.16959	5.26316	8.77193	9.35673	8.77193	0.584795	2.92398	171
ENSSSA1UGT002853	3.27869	9.83607	3.27869	4.09836	1.63934	4.09836	3.27869	3.27869	15.5738	5.7377	0.819672	13.1148	3.27869	2.45902	9.01639	3.27869	3.27869	6.55738	0.819672	3.27869	122
ENSSSA1UGT002859	6.23256	3.81395	3.53488	5.76744	3.06977	10.6977	2.97674	3.16279	6.23256	6.7907	1.02326	3.90698	3.81395	4	10.1395	10.1395	3.53488	5.67442	2.7907	2.69767	1075
ENSSSA1UGT002861	6.89655	5.74713	3.44828	5.74713	2.29885	6.89655	4.5977	3.44828	1.14943	6.89655	2.29885	4.5977	8.04598	3.44828	12.6437	12.6437	4.5977	1.14943	0	3.44828	87
ENSSSA1UGT002862	4.52261	1.00503	5.27638	5.52764	3.51759	3.51759	3.26633	8.29146	8.54271	12.3116	0.753769	5.02513	5.52764	3.01508	5.77889	5.77889	7.28643	5.27638	1.75879	4.0201	398
ENSSSA1UGT002864	3.40557	1.85759	8.04954	5.88235	7.73994	3.09598	2.78638	6.19195	7.43034	8.97833	2.16718	6.19195	4.02477	3.71517	6.81115	6.81115	3.40557	5.88235	1.85759	3.71517	323
ENSSSA1UGT002868	5.47945	4.30528	2.93542	4.10959	5.67515	4.69667	3.91389	5.47945	5.28376	6.65362	0.391389	5.08806	4.10959	4.50098	10.9589	12.3288	4.50098	5.47945	0.587084	3.5225	511
ENSSSA1UGT002869	4.13223	6.61157	5.78512	9.09091	2.47934	2.47934	5.78512	4.13223	6.61157	5.78512	3.30579	6.61157	4.95868	3.30579	8.26446	3.30579	5.78512	4.95868	1.65289	4.95868	121
ENSSSA1UGT002873	7.89474	3.94737	1.31579	9.21053	14.4737	1.31579	1.31579	9.21053	5.26316	7.89474	2.63158	7.89474	2.63158	2.63158	3.94737	7.89474	2.63158	5.26316	1.31579	1.31579	76
ENSSSA1UGT002874	6.21469	1.12994	5.83804	3.57815	6.02637	1.12994	3.20151	8.47458	7.15631	14.3126	2.07156	5.08475	3.76648	2.82486	5.27307	8.85122	6.21469	4.89642	1.12994	2.82486	531
ENSSSA1UGT002875	4.88323	1.69851	4.67091	7.64331	4.4586	5.52017	1.69851	5.30786	5.30786	8.70488	2.12314	4.4586	7.85563	3.82166	7.431	8.06794	4.03397	7.00637	1.27389	4.03397	471
ENSSSA1UGT002877	3.04183	6.08365	3.23194	1.71103	9.31559	4.37262	3.61217	5.89354	4.94297	8.93536	0.570342	4.94297	5.89354	4.18251	7.98479	11.7871	4.37262	4.94297	1.14068	3.04183	526
ENSSSA1UGT002880	5.70305	2.94985	3.83481	5.89971	5.01475	6.78466	1.76991	5.21141	4.42478	9.43953	2.94985	5.01475	4.62144	3.04818	5.99803	10.9145	6.39135	5.70305	1.76991	2.55654	1017
ENSSSA1UGT002881	4.36242	2.01342	5.7047	7.04698	5.20134	2.85235	4.02685	6.37584	4.69799	12.9195	2.68456	4.02685	4.86577	5.7047	4.36242	10.5705	3.52349	5.03356	0.503356	3.52349	596
ENSSSA1UGT002882	3.25444	1.47929	5.32544	5.6213	6.21302	5.02959	2.66272	6.50888	8.57988	8.57988	2.36686	6.21302	6.50888	3.25444	2.95858	7.98817	3.5503	9.76331	0.887574	3.25444	338
ENSSSA1UGT002883	8.24742	2.57732	0.515464	4.12371	8.24742	8.76289	0.515464	7.21649	3.09278	11.3402	4.12371	1.03093	4.12371	1.54639	6.70103	8.76289	7.21649	8.24742	1.03093	2.57732	194
ENSSSA1UGT002886	3.99674	4.323	1.38662	2.61011	6.52529	3.09951	2.93638	6.28059	7.50408	10.8483	4.0783	5.13866	3.99674	4.5677	6.76998	11.1746	4.40457	4.5677	1.95759	3.83361	1226
ENSSSA1UGT002889	4.08922	2.04461	2.60223	3.5316	6.69145	3.5316	2.04461	6.69145	7.99257	9.29368	1.48699	3.90335	5.20446	4.46097	7.24907	13.197	6.13383	5.76208	1.67286	2.41636	538
ENSSSA1UGT002890	6.0241	2.20884	3.21285	4.41767	5.42169	6.62651	2.61044	5.02008	4.21687	9.63855	1.20482	4.61847	6.2249	4.41767	11.4458	9.03614	4.41767	4.81928	1.20482	3.21285	498
ENSSSA1UGT002891	4.5728	2.76775	1.20337	3.00842	6.01685	2.88809	2.16606	6.01685	7.70156	10.4693	3.12876	6.01685	3.12876	4.5728	8.42359	10.9507	7.70156	5.29483	2.04573	1.92539	831
ENSSSA1UGT002892	2.52101	4.06162	0.980392	3.36134	3.78151	6.02241	2.94118	6.02241	6.16246	9.66387	1.96078	4.48179	6.02241	5.46218	11.0644	8.68347	6.86275	4.06162	1.82073	4.06162	714
ENSSSA1UGT002893	3.8961	3.0303	7.35931	6.49351	7.79221	4.7619	3.0303	3.4632	5.62771	8.22511	3.0303	6.49351	3.8961	4.329	7.35931	5.19481	5.19481	3.8961	1.7316	5.19481	231
ENSSSA1UGT002895	9.90654	1.86916	3.17757	4.48598	2.24299	10.4673	5.04673	1.68224	2.05607	7.1028	0.186916	1.30841	11.5888	5.79439	13.6449	9.34579	3.73832	5.04673	0.747664	0.560748	535
ENSSSA1UGT002896	4.98008	1.99203	6.1753	7.17131	4.78088	5.37849	2.78884	5.37849	6.3745	9.56175	1.79283	4.78088	6.57371	3.18725	5.57769	6.77291	3.98406	5.9761	2.98805	3.78486	502
ENSSSA1UGT002897	5.27638	5.77889	2.76382	3.26633	7.78894	2.01005	3.76884	6.53266	6.53266	6.53266	0.753769	4.52261	4.27136	5.02513	5.77889	10.5528	6.03015	4.52261	4.27136	4.0201	398
ENSSSA1UGT002900	3.46232	3.86965	1.42566	2.85132	3.05499	10.7943	0.814664	4.27699	7.12831	9.77597	3.25866	3.46232	3.05499	2.64766	10.998	12.22	5.70265	6.10998	2.85132	2.24033	491
ENSSSA1UGT002902	5.20833	2.08333	7.29167	4.16667	6.25	7.29167	3.125	8.33333	7.29167	8.33333	2.08333	5.20833	1.04167	3.125	8.33333	4.16667	5.20833	8.33333	1.04167	2.08333	96
ENSSSA1UGT002903	3.51906	2.6393	3.51906	8.79765	3.22581	3.81232	2.34604	5.8651	12.0235	9.38416	1.17302	7.91789	8.79765	4.98534	2.93255	2.93255	8.5044	3.22581	0.879765	3.51906	341
ENSSSA1UGT002905	4.21941	0.421941	5.48523	3.79747	6.32911	3.37553	1.68776	3.79747	7.173	12.6582	3.37553	5.06329	4.21941	4.64135	7.59494	12.6582	6.32911	4.64135	0.421941	2.1097	237
ENSSSA1UGT002906	4.34783	3.96975	3.21361	4.53686	5.67108	4.15879	2.83554	6.23819	6.80529	9.07372	1.51229	5.48204	4.34783	4.7259	6.80529	9.26276	4.7259	7.18336	1.32325	3.78072	529
ENSSSA1UGT002909	2.91262	1.61812	1.61812	3.55987	5.50162	3.23625	1.94175	11.6505	7.44337	12.6214	2.91262	7.44337	3.8835	5.17799	3.55987	7.76699	5.82524	5.50162	1.94175	3.8835	309
ENSSSA1UGT002912	2.43902	2.43902	0.813008	1.62602	9.7561	21.1382	0	1.62602	0	2.43902	0	1.62602	10.5691	9.7561	0.813008	22.7642	8.94309	0.813008	1.62602	0.813008	123
ENSSSA1UGT002913	5	8.18182	0.909091	4.09091	7.27273	3.18182	10.4545	3.18182	8.18182	5	0.454545	3.63636	3.63636	2.27273	6.36364	13.1818	13.1818	0.454545	0	1.36364	220
ENSSSA1UGT002914	6.88202	2.24719	3.79213	4.91573	5.47753	4.77528	3.08989	5.33708	6.60112	10.9551	3.08989	4.63483	6.46067	2.10674	5.05618	8.14607	3.79213	7.44382	0.983146	4.21348	712
ENSSSA1UGT002916	5.57315	2.08993	1.07663	1.96327	3.16656	4.30652	2.40659	6.39645	6.20646	10.2597	3.73654	3.48322	6.01647	5.0665	9.43635	10.9563	8.73971	6.52312	1.45662	1.13996	1579
ENSSSA1UGT002917	4.11074	1.42617	5.7047	7.9698	1.92953	4.44631	3.60738	3.69128	9.56376	7.46644	1.51007	3.94295	7.80201	2.68456	6.29195	14.2617	5.03356	5.20134	0.671141	2.68456	1192
ENSSSA1UGT002921	3.125	4.16667	4.16667	7.29167	6.25	2.08333	4.16667	9.375	11.4583	6.25	2.08333	4.16667	4.16667	6.25	2.08333	7.29167	4.16667	7.29167	0	4.16667	96
ENSSSA1UGT002922	4.90196	2.84314	5	5.29412	5.09804	3.33333	2.54902	5.78431	7.84314	11.2745	2.05882	4.90196	4.01961	3.72549	4.70588	10.098	6.47059	5.29412	1.27451	3.52941	1020
ENSSSA1UGT002923	3.72578	4.02385	3.12966	3.87481	8.79285	3.42772	1.78838	9.68703	7.89866	13.5618	1.93741	4.91803	2.3845	3.27869	3.57675	11.1773	3.72578	4.769	0.745156	3.57675	671
ENSSSA1UGT002926	4.77816	3.24232	6.31399	5.80205	5.9727	6.65529	2.04778	5.11945	5.2901	12.628	1.02389	5.11945	4.94881	3.41297	5.80205	8.36177	4.26621	5.9727	1.87713	1.36519	586
ENSSSA1UGT002927	7.42638	2.56082	3.07298	4.9936	7.55442	8.06658	2.8169	2.68886	3.84123	11.3956	1.02433	3.71319	5.37772	4.48143	11.0115	7.93854	5.24968	4.48143	0.768246	1.53649	781
ENSSSA1UGT002931	3.63128	2.65363	3.07263	3.07263	8.79888	3.63128	2.23464	7.82123	6.28492	13.9665	2.09497	5.02793	4.32961	2.65363	5.1676	8.37989	5.1676	7.12291	0.977654	3.91061	716
ENSSSA1UGT002932	4.35967	3.54223	3.95095	7.08447	6.26703	2.86104	2.86104	5.17711	9.26431	12.3978	2.45232	3.26975	3.95095	5.31335	4.76839	8.71935	4.35967	4.90463	1.08992	3.40599	734
ENSSSA1UGT002935	4.02235	4.02235	2.56983	4.02235	6.59218	5.92179	4.13408	5.2514	5.92179	7.03911	0.893855	5.69832	4.24581	5.02793	9.94413	10.2793	6.59218	4.24581	0.670391	2.90503	895
ENSSSA1UGT002937	5.11628	5.42636	1.70543	1.55039	8.99225	4.8062	4.65116	5.42636	4.65116	10.8527	1.24031	5.27132	2.94574	5.42636	7.28682	9.76744	5.27132	4.18605	1.70543	3.72093	645
ENSSSA1UGT002939	5.81717	3.3241	2.35457	3.60111	5.81717	5.26316	3.4626	6.23269	3.1856	7.89474	2.35457	5.40166	6.37119	4.01662	8.58726	10.5263	5.40166	5.54017	2.21607	2.63158	722
ENSSSA1UGT002941	3.67347	2.85714	4.4898	5.30612	6.12245	3.67347	6.12245	5.30612	4.08163	13.4694	2.44898	4.4898	3.67347	2.85714	5.71429	8.16327	5.71429	4.89796	2.44898	4.4898	245
ENSSSA1UGT002943	9.5672	1.82232	4.7836	3.41686	2.73349	7.74487	4.10023	2.2779	3.18907	8.88383	2.05011	2.2779	8.65604	4.32802	5.46697	13.4396	6.83371	4.32802	0.911162	3.18907	439
ENSSSA1UGT002944	3.57143	2.71429	2.14286	1.14286	5.14286	2.85714	2.28571	8.57143	11	12.5714	4.57143	4.71429	4.57143	3.57143	7.14286	10.4286	5.57143	3.28571	1.71429	2.42857	700
ENSSSA1UGT002946	5.28634	3.30396	3.30396	4.40529	3.0837	8.81057	1.10132	5.06608	10.3524	9.2511	2.86344	3.30396	3.30396	2.42291	10.793	7.92952	4.40529	5.94714	3.0837	1.98238	454
ENSSSA1UGT002947	4.63483	1.40449	4.49438	5.89888	7.58427	3.65169	3.23034	6.03933	7.02247	10.6742	2.66854	4.07303	4.21348	3.79213	6.60112	7.72472	5.05618	6.60112	0.842697	3.79213	712
ENSSSA1UGT002948	3.125	3.36538	1.44231	5.04808	7.21154	3.125	4.56731	9.375	6.00962	7.69231	0.721154	5.52885	3.84615	4.80769	9.375	11.2981	4.32692	2.88462	0.961538	5.28846	416
ENSSSA1UGT002952	5.20059	3.12036	3.41753	4.08618	7.57801	3.71471	2.6003	6.24071	4.90342	12.7786	2.08024	4.23477	4.68053	3.789	4.82912	9.88113	4.75483	7.28083	0.742942	4.08618	1346
ENSSSA1UGT002954	4.38596	5.26316	2.48538	4.38596	6.14035	4.38596	3.65497	6.72515	5.26316	10.2339	1.16959	5.55556	3.50877	3.50877	6.57895	10.6725	4.97076	5.99415	1.75439	3.36257	684
ENSSSA1UGT002955	4.1958	2.331	1.6317	1.8648	5.36131	5.36131	3.2634	8.39161	9.79021	10.0233	1.8648	6.06061	3.2634	3.2634	9.32401	9.55711	5.82751	3.7296	1.6317	3.2634	429
ENSSSA1UGT002960	7.14286	1.71429	4.85714	6.28571	4.85714	5.42857	3.42857	6.28571	6	11.1429	2.85714	3.71429	4	5.42857	4.85714	7.42857	2.28571	6.57143	1.14286	4.57143	350
ENSSSA1UGT002962	5.95238	2.55102	4.59184	2.38095	3.91156	6.80272	2.55102	6.12245	4.42177	13.9456	1.19048	3.7415	4.7619	3.91156	4.7619	11.0544	5.78231	6.12245	2.04082	3.40136	588
ENSSSA1UGT002963	4.94505	2.1978	6.59341	7.69231	1.64835	3.84615	3.2967	8.79121	4.94505	8.24176	2.74725	5.49451	1.64835	2.74725	8.24176	11.5385	3.2967	8.79121	1.0989	2.1978	182
ENSSSA1UGT002964	3.65591	3.22581	1.50538	1.50538	3.65591	5.16129	2.7957	6.23656	5.16129	8.60215	1.93548	4.08602	4.30108	4.73118	12.9032	14.1935	6.88172	6.45161	1.93548	1.07527	465
ENSSSA1UGT002965	5.54017	4.98615	2.21607	1.93906	6.09418	2.77008	0.831025	8.31025	3.60111	9.14127	1.10803	3.3241	5.26316	1.66205	9.14127	12.7424	8.03324	8.86427	1.38504	3.04709	361
ENSSSA1UGT002969	3.31878	3.05677	2.8821	3.84279	12.4017	3.31878	4.80349	7.24891	5.50218	12.2271	2.09607	5.58952	2.44541	3.75546	3.40611	8.82096	4.36681	5.85153	0.873362	4.19214	1145
ENSSSA1UGT002972	10.2041	1.70068	3.06122	4.42177	7.48299	7.82313	1.36054	9.52381	6.46259	7.82313	2.04082	2.38095	4.08163	3.7415	4.42177	8.5034	6.46259	5.10204	1.02041	2.38095	294
ENSSSA1UGT002974	4.04463	2.92887	3.20781	4.88145	5.5788	4.74198	3.20781	5.99721	6.83403	10.0418	2.09205	5.5788	6.41562	4.32357	5.16039	9.20502	5.5788	5.85774	0.69735	3.62622	717
ENSSSA1UGT002977	5.35117	0	6.68896	8.02676	3.67893	7.35786	4.34783	3.34448	6.35452	9.36455	1.67224	2.34114	9.0301	1.67224	4.68227	10.7023	4.68227	5.35117	0.668896	4.68227	299
ENSSSA1UGT002980	7.11061	2.14447	2.0316	3.7246	3.49887	6.20767	1.91874	3.386	4.62754	9.14221	2.14447	4.62754	7.44921	2.3702	11.7381	10.158	9.59368	4.62754	1.24153	2.25734	886
ENSSSA1UGT002982	7.8534	2.09424	5.2356	7.32984	4.71204	3.14136	1.57068	6.28272	4.18848	11.5183	1.57068	6.28272	4.18848	4.71204	6.28272	7.32984	5.2356	4.18848	2.6178	3.66492	191
ENSSSA1UGT002983	8.50299	1.79641	5.7485	3.47305	4.67066	4.79042	2.51497	6.94611	5.62874	11.976	2.15569	5.98802	3.59281	1.91617	8.86228	7.06587	3.59281	6.10778	1.1976	3.47305	835
ENSSSA1UGT002984	5.33333	4.44444	4	4.88889	5.77778	4.88889	7.55556	4.88889	7.11111	4.88889	1.77778	6.22222	1.77778	7.55556	8	8.88889	4.44444	3.11111	1.77778	2.66667	225
ENSSSA1UGT002985	7.4359	2.5641	5.38462	4.61538	2.30769	7.17949	3.33333	5.12821	5.38462	12.3077	2.30769	3.84615	3.58974	3.07692	4.61538	7.69231	5.64103	9.74359	1.53846	2.30769	390
ENSSSA1UGT002987	3.0303	2.27273	5.30303	4.54545	2.27273	18.9394	0.757576	5.30303	7.57576	5.30303	2.27273	5.30303	5.30303	2.27273	12.1212	3.0303	4.54545	6.06061	1.51515	2.27273	132
ENSSSA1UGT002988	1.51515	4.54545	1.51515	3.0303	0	1.51515	3.0303	9.09091	9.09091	10.6061	6.06061	3.0303	4.54545	9.09091	10.6061	6.06061	1.51515	7.57576	3.0303	4.54545	66
ENSSSA1UGT002989	3.56506	2.31729	4.09982	4.99109	6.41711	4.27807	2.49554	7.13012	5.16934	14.082	1.96078	5.88235	5.16934	4.63458	4.27807	6.77362	6.77362	7.13012	0.534759	2.31729	561
ENSSSA1UGT002990	5.86957	4.34783	4.56522	8.04348	4.13043	5	1.73913	4.78261	10.8696	8.47826	1.95652	7.3913	2.17391	3.04348	6.73913	8.47826	3.26087	4.78261	0.652174	3.69565	460
ENSSSA1UGT002993	5.55957	4.69314	1.80505	2.74368	6.20939	3.97112	1.66065	6.06498	3.3935	7.87004	1.51625	2.59928	6.7148	1.94946	8.30325	17.4729	8.08664	5.34296	2.23827	1.80505	1385
ENSSSA1UGT002995	5.0537	2.40051	3.34807	3.47442	8.02274	4.48515	2.46368	8.27543	7.39103	10.2969	1.76879	4.42198	4.67467	2.71636	6.06443	8.65445	4.80101	5.68541	1.13708	4.86418	1583
ENSSSA1UGT002996	4.53988	4.53988	2.57669	5.15337	6.38037	3.43558	3.68098	6.87117	7.48466	5.88957	0.858896	4.90798	3.06748	7.73006	7.73006	12.2699	4.53988	4.29448	0.613497	3.43558	815
ENSSSA1UGT002997	5.85774	2.09205	4.39331	5.43933	5.64854	4.39331	2.71967	6.06695	7.53138	14.8536	1.04603	3.55649	3.76569	4.60251	3.55649	10.0418	4.81172	5.64854	0.83682	3.13808	478
ENSSSA1UGT002998	3.22581	3.87097	3.22581	3.87097	7.74194	4.51613	2.68817	6.23656	6.23656	12.6882	2.04301	5.05376	5.26882	2.90323	5.69892	11.6129	4.19355	4.83871	0.537634	3.54839	930
ENSSSA1UGT003000	4.66102	3.24859	6.63842	4.80226	2.82486	5.50847	2.40113	5.50847	7.62712	11.0169	2.54237	4.51977	3.81356	5.22599	5.36723	7.06215	5.08475	8.19209	1.27119	2.68362	708
ENSSSA1UGT003002	7.73381	3.41727	3.77698	1.97842	2.69784	10.7914	5.7554	1.43885	1.61871	11.6906	1.25899	1.97842	8.81295	5.39568	12.9496	4.4964	3.41727	5.93525	1.97842	2.8777	556
ENSSSA1UGT003006	3.98551	3.44203	1.63043	4.34783	3.26087	8.33333	0.362319	4.71014	7.97101	8.15217	4.71014	3.80435	5.61594	3.26087	11.0507	9.96377	5.07246	4.71014	2.71739	2.89855	552
ENSSSA1UGT003008	6.52504	1.82094	5.00759	7.13202	3.64188	3.79363	2.73141	8.49772	9.40819	10.6222	1.51745	4.55235	3.18665	4.24886	5.15933	5.91806	6.52504	6.22155	0.30349	3.18665	659
ENSSSA1UGT003009	4.66149	1.33185	4.99445	4.99445	3.55161	3.6626	2.77469	8.76804	9.21199	11.8757	0.887902	6.65927	5.32741	3.44062	4.88346	7.43618	7.32519	3.10766	1.44284	3.6626	901
ENSSSA1UGT003012	5.7554	1.91847	6.23501	7.43405	4.55635	3.35731	1.43885	4.55635	8.63309	10.5516	2.8777	4.79616	3.11751	7.19424	4.07674	10.7914	6.95444	2.39808	1.19904	2.15827	417
ENSSSA1UGT003016	3.00752	4.13534	4.13534	3.38346	4.51128	4.51128	0.75188	4.88722	9.02256	8.27068	1.50376	3.7594	4.13534	3.38346	10.1504	13.5338	8.27068	4.88722	1.12782	2.63158	266
ENSSSA1UGT003017	4.86726	1.65929	1.54867	2.54425	4.42478	2.98673	4.75664	5.30973	7.19027	12.9425	3.87168	5.19912	5.0885	6.74779	9.18142	7.52212	5.19912	5.42035	1.10619	2.43363	904
ENSSSA1UGT003019	5.6701	0.257732	8.50515	10.3093	2.57732	5.92784	1.80412	4.12371	10.3093	9.02062	3.35052	3.86598	5.6701	4.89691	5.41237	7.98969	3.86598	3.86598	0.515464	2.06186	388
ENSSSA1UGT003021	4.77178	2.90456	1.76349	2.6971	5.49793	3.11203	3.11203	6.639	6.22407	11.3071	3.83817	3.94191	5.91286	6.0166	6.74274	8.09129	6.95021	7.05394	1.34855	2.07469	964
ENSSSA1UGT003022	5	2.72727	3.63636	3.18182	3.18182	5.90909	5	7.27273	4.09091	8.18182	0.454545	4.09091	6.36364	5	13.1818	11.8182	4.09091	3.63636	1.81818	1.36364	220
ENSSSA1UGT003024	7.08783	2.61941	5.23883	5.70108	1.849	6.16333	1.69492	5.23883	3.54391	6.93374	0.924499	4.6225	6.62558	4.6225	8.32049	8.62866	5.85516	9.70724	1.54083	3.08166	649
ENSSSA1UGT003025	2.68741	2.12164	1.83876	3.67751	6.08204	3.39463	1.13154	8.48656	10.0424	14.2857	3.53607	4.52617	6.08204	3.39463	5.79915	6.93069	7.07214	5.09194	1.13154	2.68741	707
ENSSSA1UGT003031	5.63107	3.49515	4.27184	5.43689	5.63107	7.18447	1.94175	5.82524	6.40777	10.2913	1.5534	5.43689	5.24272	3.68932	4.46602	7.76699	4.46602	7.37864	1.16505	2.71845	515
ENSSSA1UGT003033	4.88506	2.44253	4.31034	6.75287	3.73563	7.61494	1.72414	5.02874	7.9023	7.75862	2.44253	4.45402	1.72414	5.45977	8.33333	7.75862	3.87931	8.18966	2.29885	3.3046	696
ENSSSA1UGT003035	4.42177	2.04082	3.40136	6.80272	5.78231	3.06122	0.680272	5.44218	15.3061	12.585	2.04082	2.38095	3.7415	3.40136	4.08163	7.14286	4.42177	8.5034	1.02041	3.7415	294
ENSSSA1UGT003036	4.79452	2.16895	3.88128	5.82192	3.19635	8.21918	3.3105	4.22374	3.88128	7.99087	0.570776	2.96804	7.6484	6.621	14.6119	7.19178	4.68037	5.3653	0.799087	2.05479	876
ENSSSA1UGT003038	4.05539	3.06627	2.07715	3.75865	5.93472	3.75865	2.96736	5.24233	6.42928	11.7705	2.17606	3.06627	4.54995	4.64886	6.52819	12.1662	5.63798	6.82493	2.4728	2.86845	1011
ENSSSA1UGT003039	8.49858	3.96601	1.84136	2.9745	4.67422	5.24079	2.69122	4.53258	4.95751	10.1983	1.41643	2.9745	7.36544	3.11615	8.78187	11.4731	7.64873	4.67422	1.55807	1.41643	706
ENSSSA1UGT003045	7.04225	1.76056	4.34272	5.98592	5.16432	5.28169	2.23005	5.6338	8.68545	11.0329	1.64319	3.40376	4.46009	3.28638	5.51643	8.80282	5.6338	7.277	0.586854	2.23005	852
ENSSSA1UGT003046	5.30303	2.27273	6.06061	5.30303	7.57576	0.757576	3.0303	6.81818	6.81818	15.9091	0	2.27273	3.78788	3.78788	3.78788	12.1212	3.78788	3.78788	1.51515	5.30303	132
ENSSSA1UGT003048	5.75693	2.55864	5.75693	7.46269	6.39659	3.19829	3.19829	7.03625	5.11727	13.0064	3.19829	4.26439	3.62473	3.19829	5.54371	8.52878	4.90405	4.26439	0	2.98507	469
ENSSSA1UGT003049	5.12821	3.9886	4.2735	7.69231	5.98291	5.69801	3.4188	5.41311	9.40171	6.83761	1.1396	3.7037	3.9886	3.9886	5.98291	9.97151	3.9886	4.2735	1.7094	3.4188	351
ENSSSA1UGT003054	5.92593	0.740741	2.22222	3.33333	5.92593	7.40741	0.740741	9.25926	4.07407	11.4815	3.33333	6.2963	1.85185	2.59259	4.44444	8.14815	8.14815	7.03704	2.22222	4.81481	270
ENSSSA1UGT003056	4.85714	3.90476	1.52381	4.28571	5.04762	4.66667	3.71429	5.2381	7.14286	6.47619	0.952381	4.09524	3.52381	4.47619	11.7143	12.2857	8.19048	4.38095	1.33333	2.19048	1050
ENSSSA1UGT003059	6.16883	5.51948	3.24675	3.57143	7.14286	4.22078	0.974026	3.8961	5.19481	6.16883	1.62338	4.54545	6.49351	2.92208	7.46753	10.7143	7.14286	8.76623	2.27273	1.94805	308
ENSSSA1UGT003061	5.57769	2.78884	6.3745	7.17131	5.17928	5.17928	1.99203	7.96813	9.16335	8.36653	1.59363	5.57769	2.78884	1.59363	4.78088	8.76494	3.98406	4.78088	1.59363	4.78088	251
ENSSSA1UGT003062	3.47222	2.22222	4.30556	7.22222	3.33333	4.72222	2.91667	5.41667	8.47222	11.25	1.25	7.63889	5.27778	4.02778	5.41667	9.30556	4.30556	6.38889	0.694444	2.36111	720
ENSSSA1UGT003065	4.16667	1.51515	0.757576	3.40909	3.0303	3.40909	1.51515	6.43939	10.6061	14.3939	1.51515	2.27273	4.92424	5.68182	9.84848	10.2273	6.43939	7.19697	1.13636	1.51515	264
ENSSSA1UGT003070	4.77387	2.01005	4.52261	6.28141	3.26633	6.28141	2.26131	7.03518	6.53266	12.3116	2.26131	4.27136	3.51759	5.02513	5.27638	8.79397	3.76884	7.28643	1.25628	3.26633	398
ENSSSA1UGT003077	3.50404	2.15633	2.96496	5.12129	5.66038	3.2345	3.50404	8.62534	6.73854	7.00809	2.42588	5.12129	3.2345	3.2345	6.73854	13.2075	7.81671	6.469	1.88679	1.34771	371
ENSSSA1UGT003078	3.7694	3.54767	3.99113	4.21286	7.5388	4.87805	3.54767	6.87361	6.65188	9.31264	1.77384	4.87805	3.7694	3.54767	4.21286	9.97783	4.21286	7.09534	1.10865	5.09978	451
ENSSSA1UGT003080	8.25397	2.85714	3.1746	4.28571	6.19048	5.2381	1.11111	7.93651	4.28571	11.9048	3.65079	2.22222	6.19048	5.07937	3.96825	7.30159	3.80952	7.14286	1.11111	4.28571	630
ENSSSA1UGT003085	5.9633	1.00917	4.22018	4.58716	4.95413	4.31193	3.85321	5.3211	6.78899	12.4771	1.65138	3.57798	6.88073	3.85321	6.23853	7.79817	4.77064	6.97248	2.38532	2.38532	1090
ENSSSA1UGT003088	6.48148	2.31481	5.32407	6.01852	3.7037	5.78704	1.15741	8.33333	8.56481	10.4167	1.62037	3.47222	5.09259	3.24074	4.39815	9.02778	4.16667	4.62963	2.08333	4.16667	432
ENSSSA1UGT003089	4.26829	2.43902	3.04878	7.92683	4.87805	4.26829	1.21951	7.31707	9.7561	10.9756	1.21951	3.65854	4.87805	3.65854	6.70732	6.70732	7.31707	5.4878	0.609756	3.65854	164
ENSSSA1UGT003091	7.69231	4.80769	3.84615	6.73077	6.73077	8.65385	1.92308	4.80769	7.69231	5.76923	0.961538	7.69231	4.80769	3.84615	3.84615	3.84615	4.80769	6.73077	0.961538	3.84615	104
ENSSSA1UGT003092	6.61157	0.826446	3.30579	1.65289	4.95868	3.30579	3.30579	6.61157	9.91736	5.78512	1.65289	0.826446	6.61157	4.13223	8.26446	13.2231	5.78512	7.43802	0.826446	4.95868	121
ENSSSA1UGT003093	3.96825	0.793651	4.7619	5.29101	6.08466	4.2328	2.38095	4.7619	6.34921	10.8466	2.91005	5.02646	7.40741	3.43915	5.02646	6.87831	6.08466	6.34921	2.1164	5.29101	378
ENSSSA1UGT003094	5.08772	3.85965	2.10526	4.03509	7.01754	4.21053	4.03509	5.4386	4.91228	10.3509	2.10526	3.33333	6.66667	4.21053	7.89474	10.8772	5.08772	4.73684	0.877193	3.15789	570
ENSSSA1UGT003100	2.90404	2.0202	2.14646	4.79798	2.52525	4.54545	2.39899	7.32323	9.21717	11.4899	5.30303	6.31313	5.42929	5.42929	5.68182	6.43939	7.82828	6.31313	1.13636	0.757576	792
ENSSSA1UGT003103	5.73066	3.4384	4.58453	5.15759	5.15759	7.16332	2.5788	6.87679	6.59026	10.3152	3.15186	4.29799	4.29799	2.29226	4.29799	5.15759	6.87679	8.59599	1.14613	2.29226	349
ENSSSA1UGT003108	7.80856	1.51134	6.29723	2.77078	4.53401	7.80856	2.267	5.79345	5.79345	11.8388	1.51134	5.28967	5.03778	2.01511	4.53401	8.06045	4.53401	6.80101	2.01511	3.77834	397
ENSSSA1UGT003113	3.58423	3.22581	0.716846	1.07527	2.86738	4.6595	1.79211	4.6595	11.4695	10.0358	1.79211	7.16846	3.22581	3.22581	12.1864	13.9785	6.81004	2.86738	1.43369	3.22581	279
ENSSSA1UGT003116	5.35895	3.23559	5.35895	4.34783	3.64004	6.26896	2.73003	4.9545	4.65116	10.819	2.02224	6.06673	3.43782	4.1456	6.67341	11.8301	6.16785	6.06673	0.91001	1.31446	989
ENSSSA1UGT003117	5.49451	2.74725	4.3956	7.14286	5.49451	8.79121	1.64835	6.59341	8.24176	8.79121	1.0989	6.04396	4.3956	2.1978	2.74725	6.04396	6.04396	8.24176	1.0989	2.74725	182
ENSSSA1UGT003119	6.52174	4.34783	1.63043	9.78261	7.06522	3.80435	5.97826	5.43478	7.06522	6.52174	2.71739	5.43478	5.97826	4.34783	4.34783	7.06522	3.80435	4.8913	2.17391	1.08696	184
ENSSSA1UGT003124	5.1458	2.91595	3.43053	4.63122	3.94511	4.45969	3.08748	6.86106	3.94511	9.09091	1.88679	4.63122	5.66038	3.60206	4.28816	13.7221	6.51801	7.89022	2.40137	1.88679	583
ENSSSA1UGT003125	8.125	1.25	5	4.375	6.25	8.125	3.125	9.375	6.875	8.125	1.875	1.25	2.5	5	3.125	6.875	3.75	10	0.625	4.375	160
ENSSSA1UGT003128	5.19187	1.12867	8.35214	9.70655	2.93454	4.74041	3.61174	6.09481	13.3183	6.54628	1.58014	3.83747	5.64334	1.58014	6.32054	6.77201	3.386	5.86907	0.902935	2.48307	443
ENSSSA1UGT003130	5.08475	3.67232	2.68362	3.24859	4.66102	3.24859	2.40113	5.64972	7.34463	11.1582	1.69492	1.9774	4.23729	5.08475	6.49718	12.7119	6.77966	5.08475	3.38983	3.38983	708
ENSSSA1UGT003136	3.2345	1.34771	3.2345	4.04313	7.54717	4.85175	3.50404	8.3558	5.92992	10.5121	0.539084	5.66038	4.31267	4.85175	4.31267	9.97305	5.12129	7.27763	1.88679	3.50404	371
ENSSSA1UGT003137	3.84615	0.549451	6.59341	7.14286	3.84615	3.2967	1.0989	6.59341	5.49451	14.8352	3.2967	4.94505	3.84615	10.4396	4.3956	8.24176	3.84615	4.94505	0	2.74725	182
ENSSSA1UGT003139	6.22568	0.972763	5.05837	5.05837	6.80934	5.44747	2.91829	6.80934	7.58755	12.0623	1.55642	3.6965	7.58755	1.16732	3.50195	6.03113	5.64202	5.83658	1.94553	4.0856	514
ENSSSA1UGT003144	5.12821	0.42735	7.69231	6.41026	5.55556	1.28205	2.13675	9.40171	5.12821	10.2564	1.7094	7.69231	5.98291	3.4188	5.98291	9.82906	5.12821	4.2735	0.854701	1.7094	234
ENSSSA1UGT003145	4.31154	1.94715	5.14604	6.81502	6.67594	3.61613	1.39082	7.7886	10.2921	8.62309	1.94715	6.11961	4.03338	2.64256	3.47705	9.45758	6.53686	6.39777	0.973574	1.80807	719
ENSSSA1UGT003146	6.65499	2.62697	4.99124	5.8669	5.6042	5.07881	3.41506	5.8669	5.51664	9.89492	2.36427	4.64098	5.51664	4.11559	5.07881	6.65499	5.25394	6.1296	1.13835	3.59019	1142
ENSSSA1UGT003147	3.56125	5.12821	1.4245	2.5641	7.26496	3.4188	2.849	4.13105	5.12821	13.6752	2.849	3.1339	5.84046	3.4188	6.83761	11.9658	7.54986	3.56125	2.13675	3.56125	702
ENSSSA1UGT003148	4.92611	2.46305	5.41872	4.92611	5.17241	3.20197	3.69458	4.92611	5.17241	14.2857	1.97044	3.69458	4.92611	4.6798	4.4335	8.867	7.38916	5.91133	0.738916	3.20197	406
ENSSSA1UGT003149	4.90798	1.22699	2.45399	3.37423	6.74847	7.66871	1.22699	7.97546	7.05521	11.3497	3.98773	3.06748	3.06748	4.29448	3.68098	8.58896	6.74847	6.74847	1.53374	4.29448	326
ENSSSA1UGT003150	3.67394	2.92767	1.54994	2.81286	6.25718	2.69805	2.29621	6.88863	7.17566	14.7532	3.61653	4.01837	3.61653	4.3054	4.82204	11.2514	6.08496	5.74053	1.95178	3.55913	1742
ENSSSA1UGT003151	5.13293	2.18479	5.29087	6.84391	6.26481	3.60621	2.07949	7.44933	6.84391	12.1611	2.23743	4.81706	3.23769	4.00105	3.94841	8.00211	4.68544	6.71229	1.65833	2.84285	3799
ENSSSA1UGT003152	7.32484	4.93631	2.2293	2.70701	4.14013	5.57325	1.11465	3.34395	2.54777	6.84713	0.796178	3.18471	8.12102	3.50318	9.87261	17.0382	6.6879	4.77707	3.50318	1.75159	628
ENSSSA1UGT003155	4.85437	1.61812	6.47249	11.9741	3.55987	6.14887	0.970874	1.94175	12.2977	8.09061	2.26537	2.589	6.79612	2.91262	8.73786	10.6796	4.53074	2.589	0.647249	0.323625	309
ENSSSA1UGT003161	5.26316	1.91388	4.30622	3.34928	4.78469	5.26316	4.30622	5.74163	5.26316	9.56938	1.43541	4.30622	6.69856	4.30622	3.82775	4.78469	7.17703	11.4833	0.478469	5.74163	209
ENSSSA1UGT003162	6.41026	4.23077	1.53846	1.92308	4.87179	3.97436	1.66667	3.07692	4.10256	8.97436	1.28205	3.46154	7.94872	1.92308	10.3846	18.4615	5.76923	5.25641	2.94872	1.79487	780
ENSSSA1UGT003167	9.03427	1.24611	5.29595	5.29595	4.6729	3.73832	1.86916	6.23053	4.04984	9.65732	1.55763	7.16511	6.23053	4.04984	6.23053	5.29595	5.60748	7.78816	0.311526	4.6729	321
ENSSSA1UGT003171	3.07263	1.95531	6.42458	7.26257	3.07263	4.18994	2.23464	6.14525	8.65922	10.8939	1.95531	4.18994	4.7486	6.70391	5.86592	6.42458	5.86592	6.14525	1.11732	3.07263	358
ENSSSA1UGT003172	3.58744	3.58744	1.56951	4.26009	5.8296	3.36323	4.26009	9.64126	6.05381	9.64126	0.896861	4.4843	6.05381	3.58744	6.27803	10.5381	4.70852	5.38117	2.46637	3.81166	446
ENSSSA1UGT003173	2.87081	1.91388	3.34928	5.26316	6.2201	7.17703	2.39234	3.82775	4.30622	10.5263	3.82775	3.82775	4.78469	7.6555	4.30622	4.78469	10.5263	8.61244	0.478469	3.34928	209
ENSSSA1UGT003174	5.11364	3.2197	1.13636	4.35606	5.68182	5.30303	3.2197	7.38636	6.81818	10.9848	1.51515	6.25	3.0303	2.65152	8.33333	9.84848	6.25	4.16667	1.51515	3.2197	528
ENSSSA1UGT003175	5.17241	2.29885	5.74713	4.02299	10.3448	3.44828	5.74713	5.17241	5.17241	9.77011	0	6.89655	4.02299	4.02299	7.47126	6.89655	6.32184	5.17241	1.14943	1.14943	174
ENSSSA1UGT003177	4.2963	2.22222	5.33333	7.7037	6.37037	4	1.92593	5.92593	5.62963	9.77778	1.92593	5.03704	5.48148	4.74074	6.66667	9.03704	4.14815	6.37037	0.740741	2.66667	675
ENSSSA1UGT003179	5.28233	2.73224	2.55009	7.28597	4.73588	2.18579	3.09654	7.10383	11.1111	10.7468	1.27505	4.18944	3.27869	5.82878	5.64663	8.92532	4.73588	5.82878	0.910747	2.55009	549
ENSSSA1UGT003181	4.18327	1.79283	2.78884	3.98406	5.17928	4.38247	2.78884	1.79283	4.18327	13.9442	1.39442	3.78486	7.96813	3.18725	7.96813	15.9363	6.57371	4.78088	1.99203	1.39442	502
ENSSSA1UGT003183	5.34125	1.18694	7.56677	7.4184	3.56083	4.89614	1.18694	5.78635	8.75371	10.5341	2.07715	3.85757	4.45104	4.1543	6.23145	6.82493	4.89614	6.37982	1.92878	2.96736	674
ENSSSA1UGT003187	4.42842	2.05973	5.97322	7.82698	2.88363	7.00309	2.47168	6.07621	8.75386	8.4449	1.95675	3.19258	2.16272	5.45829	8.54789	5.25232	4.73738	7.51802	2.05973	3.19258	971
ENSSSA1UGT003188	4.24658	5.20548	2.05479	3.15068	7.67123	3.56164	3.28767	5.89041	4.79452	10.137	0.821918	5.06849	4.79452	4.10959	8.21918	13.4247	4.93151	4.38356	1.64384	2.60274	730
ENSSSA1UGT003189	1.5748	5.51181	5.51181	2.3622	4.72441	7.08661	6.29921	6.29921	10.2362	11.811	0.787402	3.93701	7.87402	3.93701	6.29921	3.93701	1.5748	3.93701	0	6.29921	127
ENSSSA1UGT003191	2.61438	3.26797	9.15033	7.18954	3.26797	3.26797	1.96078	4.57516	8.49673	11.7647	0.653595	4.57516	3.26797	3.26797	3.26797	15.0327	3.26797	4.57516	0.653595	5.88235	153
ENSSSA1UGT003194	5.40541	0.697472	4.62075	7.14908	3.31299	3.31299	1.22058	4.62075	7.49782	6.88753	0.784656	4.70793	7.49782	3.74891	7.585	11.6827	10.6364	5.05667	0.43592	3.13862	1147
ENSSSA1UGT003197	3.75	2.59615	1.73077	4.23077	8.17308	2.98077	2.30769	8.46154	7.98077	12.1154	0.961538	6.05769	4.03846	4.42308	7.59615	9.32692	5.38462	4.23077	1.15385	2.5	1040
ENSSSA1UGT003199	7.14286	4.69925	2.06767	2.81955	3.57143	6.57895	3.57143	4.69925	4.69925	8.27068	0.37594	4.13534	4.88722	4.13534	9.3985	11.8421	5.45113	4.32331	3.19549	4.13534	532
ENSSSA1UGT003200	4.55487	3.72671	4.7619	3.51967	3.10559	7.45342	5.17598	3.72671	5.7971	7.03934	0.414079	2.89855	3.72671	4.7619	12.6294	9.73085	4.96894	5.17598	2.69151	4.14079	483
ENSSSA1UGT003201	4.66019	5.43689	2.52427	4.27184	5.43689	6.99029	4.85437	3.49515	3.1068	7.96117	0.970874	3.1068	5.63107	6.99029	11.068	10.8738	5.24272	3.8835	1.5534	1.94175	515
ENSSSA1UGT003202	6.43939	1.13636	3.97727	8.71212	3.78788	3.2197	2.08333	7.76515	8.71212	11.7424	2.27273	5.49242	3.97727	4.54545	5.30303	6.62879	3.59848	7.19697	0.568182	2.84091	528
ENSSSA1UGT003208	6.2585	1.90476	3.67347	5.57823	3.94558	3.53741	2.17687	5.98639	10.3401	10.4762	2.44898	6.80272	3.94558	3.94558	5.44218	11.2925	4.7619	4.7619	0.544218	2.17687	735
ENSSSA1UGT003209	5.26316	4.78469	4.42584	4.54545	7.41627	4.06699	3.70813	4.06699	4.54545	12.201	1.79426	5.26316	4.06699	5.14354	8.85167	8.73206	3.34928	3.82775	0.837321	3.11005	836
ENSSSA1UGT003220	5.23918	4.55581	2.50569	4.10023	5.01139	7.28929	4.55581	5.01139	4.32802	7.0615	1.13895	3.18907	4.10023	2.73349	11.1617	9.33941	6.37813	6.83371	1.36674	4.10023	439
ENSSSA1UGT003221	5.76342	1.67325	5.01975	9.13316	4.29933	5.90286	2.83523	5.76342	5.71694	6.99512	1.60353	3.74158	5.76342	4.83384	5.48455	7.08808	6.83244	7.22752	1.02254	3.30002	4303
ENSSSA1UGT003223	5.66802	1.61943	4.45344	5.26316	6.07287	4.8583	4.04858	3.23887	3.64372	8.50202	2.02429	2.83401	3.23887	8.09717	8.09717	12.1457	6.47773	5.66802	1.21457	2.83401	247
ENSSSA1UGT003227	3.48331	3.0479	1.88679	3.0479	5.3701	4.49927	3.0479	5.80552	4.49927	12.4819	2.61248	3.62845	5.95065	4.209	8.27286	11.9013	7.54717	4.64441	1.74165	2.32221	689
ENSSSA1UGT003231	6.04396	1.64835	4.94505	7.69231	2.1978	7.14286	4.3956	8.79121	6.04396	7.69231	1.0989	3.84615	10.989	1.0989	6.04396	3.84615	2.74725	3.2967	4.94505	5.49451	182
ENSSSA1UGT003234	5.9322	3.76648	1.78908	3.57815	2.91902	7.15631	0.753296	5.46139	6.6855	8.56874	3.01318	3.20151	4.42561	2.82486	11.2053	9.79284	8.19209	5.17891	2.7307	2.82486	1062
ENSSSA1UGT003236	9.26641	4.6332	2.7027	3.4749	3.861	6.56371	3.0888	7.72201	5.40541	9.26641	1.1583	4.6332	5.79151	3.4749	8.88031	4.6332	6.17761	4.2471	1.5444	3.4749	259
ENSSSA1UGT003246	5.9593	2.32558	2.90698	4.36047	8.28488	7.55814	3.48837	7.12209	4.21512	9.88372	3.19767	4.06977	4.06977	2.90698	3.05233	7.12209	5.6686	5.23256	3.34302	5.23256	688
ENSSSA1UGT003248	7.21421	2.21976	5.32741	4.5505	6.65927	4.99445	1.7758	7.88013	3.55161	9.65594	3.6626	3.77358	4.88346	2.10877	5.10544	7.76915	5.32741	7.99112	1.99778	3.55161	901
ENSSSA1UGT003250	3.45253	1.84957	4.80888	6.16523	7.52158	6.16523	4.06905	7.02836	6.90506	10.9741	2.21948	5.05549	4.43896	3.20592	3.20592	5.79531	5.3021	7.52158	0.863132	3.45253	811
ENSSSA1UGT003251	3.00752	5.01253	2.00501	3.50877	4.7619	4.51128	2.50627	4.7619	7.26817	8.77193	1.75439	5.01253	4.01003	3.7594	8.77193	12.5313	9.52381	3.7594	2.50627	2.25564	399
ENSSSA1UGT003253	5.11044	2.42529	4.54742	6.4097	5.06713	4.11434	2.42529	5.71676	7.01602	9.8311	1.9489	5.37029	4.9372	4.07103	4.50411	11.4335	4.63404	6.62625	0.909485	2.90169	2309
ENSSSA1UGT003254	7.49625	1.64918	2.09895	3.44828	4.1979	4.94753	4.7976	4.34783	4.7976	7.94603	2.24888	4.1979	7.64618	3.5982	4.34783	14.5427	8.54573	4.49775	1.04948	3.5982	667
ENSSSA1UGT003255	6.00273	1.50068	6.82128	6.27558	4.91132	2.45566	2.31924	8.04911	8.18554	10.6412	1.77353	7.91269	3.13779	3.68349	4.36562	6.95771	6.13915	3.68349	0.545703	4.63847	733
ENSSSA1UGT003258	5.88972	2.13033	3.38346	4.01003	5.38847	5.88972	4.51128	5.13784	4.88722	11.5288	1.50376	4.51128	6.76692	4.01003	9.3985	6.6416	5.6391	4.7619	1.75439	2.25564	798
ENSSSA1UGT003259	6.20272	5.14372	3.177	5.29501	6.95915	4.08472	4.99244	5.14372	6.05144	7.86687	0.75643	3.78215	4.38729	4.53858	6.95915	11.1952	4.23601	3.47958	2.26929	3.47958	661
ENSSSA1UGT003261	4.67675	2.47593	5.50206	4.67675	3.989	7.70289	6.74003	2.88858	3.02613	12.1045	0.687758	2.61348	7.15268	4.12655	13.6176	7.15268	1.92572	6.46492	1.10041	1.37552	727
ENSSSA1UGT003262	12.0301	1.50376	6.76692	6.76692	4.13534	8.27068	2.63158	2.63158	2.25564	10.5263	0.37594	0.75188	5.26316	1.50376	8.27068	4.88722	5.26316	12.0301	1.8797	2.25564	266
ENSSSA1UGT003265	5.42857	4	1.42857	4	4.57143	3.71429	3.71429	6.28571	5.14286	12.8571	4.28571	5.42857	2.28571	6	8.28571	8	4.57143	5.71429	1.71429	2.57143	350
ENSSSA1UGT003267	3.8961	3.8961	3.24675	2.5974	12.3377	4.54545	1.2987	11.6883	3.8961	9.74026	0	5.84416	2.5974	1.2987	3.8961	6.49351	4.54545	11.039	3.24675	3.8961	154
ENSSSA1UGT003268	4.60993	6.73759	1.77305	5.85106	6.20567	4.25532	4.25532	4.96454	6.73759	6.38298	0.35461	4.43262	3.01418	3.5461	10.8156	11.3475	6.38298	2.83688	2.30496	3.19149	564
ENSSSA1UGT003271	12.381	0.952381	2.85714	7.61905	1.90476	3.80952	3.80952	7.61905	5.71429	8.57143	3.80952	4.7619	0	4.7619	6.66667	17.1429	1.90476	4.7619	0	0.952381	105
ENSSSA1UGT003273	0	2.04082	2.04082	14.2857	8.16327	6.12245	0	4.08163	14.2857	10.2041	0	4.08163	8.16327	8.16327	4.08163	4.08163	6.12245	0	4.08163	0	49
ENSSSA1UGT003277	6.83453	2.15827	4.31655	7.19424	5.03597	5.39568	4.31655	6.83453	6.47482	11.5108	0.359712	5.39568	1.43885	2.51799	4.31655	7.55396	5.39568	8.63309	0.719424	3.59712	278
ENSSSA1UGT003278	3.91459	3.08422	2.4911	4.62633	9.01542	2.13523	2.25386	8.30368	8.30368	13.5231	1.89798	4.03321	4.50771	4.74496	4.86358	8.06643	3.44009	5.4567	1.66074	3.67734	843
ENSSSA1UGT003280	7.5	3.05556	3.05556	4.72222	3.88889	4.44444	3.61111	6.94444	5.55556	11.1111	0.555556	5.83333	5	5.55556	3.61111	10.2778	6.38889	4.16667	1.11111	3.61111	360
ENSSSA1UGT003281	7.36434	0.775194	3.10078	3.87597	2.32558	12.0155	2.32558	3.10078	4.26357	3.87597	0.387597	5.42636	3.48837	8.91473	3.10078	18.9922	4.65116	5.42636	1.16279	5.42636	258
ENSSSA1UGT003284	2.84281	2.50836	4.68227	6.18729	7.85953	2.17391	2.17391	7.35786	7.85953	16.388	1.17057	6.52174	2.00669	4.01338	2.17391	8.69565	5.51839	6.02007	1.00334	2.84281	598
ENSSSA1UGT003287	5.4007	3.13589	4.3554	4.52962	6.27178	3.48432	2.09059	5.92334	6.44599	10.6272	2.43902	5.22648	3.48432	4.18118	6.79443	9.05923	4.18118	6.79443	0.348432	5.22648	574
ENSSSA1UGT003293	3.73134	2.98507	3.73134	5.22388	11.194	8.20896	2.98507	4.47761	8.95522	9.70149	2.23881	6.71642	3.73134	2.23881	5.22388	6.71642	2.23881	7.46269	0.746269	1.49254	134
ENSSSA1UGT003294	5.00334	3.73582	1.60107	3.33556	4.53636	5.00334	1.40093	4.26951	4.00267	7.60507	1.40093	2.73516	8.47231	1.86791	9.53969	16.4777	10.6071	4.40294	2.26818	1.73449	1499
ENSSSA1UGT003299	4.6332	3.0888	5.01931	7.72201	6.17761	4.05405	1.9305	5.79151	6.37066	8.10811	1.9305	6.94981	4.6332	3.28185	4.2471	9.26641	6.17761	7.14286	0.772201	2.7027	518
ENSSSA1UGT003303	3.37756	2.17129	4.70446	5.66948	6.6345	3.86007	3.61882	8.56454	7.35826	9.52955	1.68878	6.39324	4.10133	3.25694	2.6538	10.1327	4.70446	6.27262	1.08565	4.22195	829
ENSSSA1UGT003304	3.125	2.38971	3.30882	5.51471	5.51471	8.45588	2.94118	6.25	7.72059	6.98529	2.57353	4.77941	3.86029	4.59559	6.98529	5.88235	5.88235	8.63971	1.83824	2.75735	544
ENSSSA1UGT003305	9.40767	1.0453	6.96864	5.22648	5.57491	6.96864	2.43902	6.27178	8.7108	11.4983	1.74216	4.18118	4.52962	2.78746	3.48432	5.92334	4.18118	6.27178	0.696864	2.09059	287
ENSSSA1UGT003306	7.24234	2.22841	2.50696	3.62117	4.73538	10.0279	2.78552	4.45682	3.62117	9.1922	1.39276	2.78552	10.3064	3.06407	13.649	6.12813	4.73538	5.29248	0.835655	1.39276	359
ENSSSA1UGT003308	6.68449	1.06952	5.08021	8.55615	5.34759	6.14973	3.20856	6.68449	4.81283	8.28877	2.94118	4.54545	5.61497	2.94118	6.68449	4.54545	5.61497	5.61497	1.87166	3.74332	374
ENSSSA1UGT003309	4.2065	0.956023	10.7075	9.36902	6.69216	7.26577	1.52964	4.2065	11.0899	4.39771	2.86807	2.29446	5.16252	2.29446	2.86807	9.17782	4.97132	6.11855	0.573614	3.25048	523
ENSSSA1UGT003311	4.85075	1.49254	5.97015	5.97015	4.85075	7.46269	4.10448	5.97015	4.10448	11.194	0.746269	8.95522	4.85075	4.47761	5.22388	2.61194	4.47761	5.97015	2.61194	4.10448	268
ENSSSA1UGT003313	3.2634	3.2634	1.8648	3.0303	6.29371	3.2634	4.8951	7.22611	7.69231	9.79021	3.2634	3.2634	6.52681	3.0303	8.39161	9.09091	6.99301	4.4289	2.5641	1.8648	429
ENSSSA1UGT003316	4.69484	3.59937	2.66041	2.8169	6.57277	4.38185	2.03443	5.47731	4.22535	10.7981	1.56495	2.9734	7.35524	3.91236	7.98122	11.4241	5.16432	8.13772	2.19092	2.03443	639
ENSSSA1UGT003320	2.16749	3.05419	2.16749	3.25123	7.88177	3.25123	4.63054	4.33498	7.29064	9.55665	0.985222	7.19212	5.22167	3.44828	7.38916	13.4975	6.2069	2.6601	1.28079	4.53202	1015
ENSSSA1UGT003326	5.95238	1.5873	5.55556	3.7037	7.67196	6.61376	1.98413	6.21693	2.6455	8.73016	2.77778	5.02646	5.55556	4.36508	5.82011	6.87831	5.68783	6.61376	1.71958	4.89418	756
ENSSSA1UGT003327	6.00375	3.65854	3.93996	3.56473	4.12758	8.63039	5.62852	4.78424	2.62664	8.53659	0.562852	4.87805	5.4409	3.93996	12.0075	9.94371	2.90807	4.97186	1.59475	2.25141	1066
ENSSSA1UGT003331	4.63822	2.22635	1.85529	3.15399	5.38033	2.78293	3.33952	5.38033	5.38033	16.5121	2.78293	5.00928	5.38033	5.19481	6.49351	7.05009	6.86456	5.38033	2.41187	2.78293	539
ENSSSA1UGT003337	4.91329	1.30058	3.3237	7.08092	3.61272	6.06936	2.02312	4.91329	4.33526	11.2717	1.01156	4.19075	4.91329	4.47977	7.65896	8.95954	7.36994	8.09249	1.44509	3.03468	692
ENSSSA1UGT003338	6.54762	1.78571	4.16667	6.25	2.38095	5.05952	2.08333	9.52381	9.82143	6.84524	2.67857	4.16667	6.54762	2.38095	5.35714	9.22619	6.25	5.05952	2.38095	1.4881	336
ENSSSA1UGT003342	4.82234	1.01523	5.58376	6.85279	3.04569	6.85279	2.79188	6.34518	9.64467	6.09137	2.79188	4.06091	2.53807	6.34518	7.1066	5.83756	4.06091	8.88325	1.52284	3.80711	394
ENSSSA1UGT003345	4.22535	3.52113	4.22535	10.5634	3.52113	4.92958	0.704225	7.74648	5.6338	10.5634	0.704225	4.22535	4.22535	4.22535	2.8169	11.2676	4.22535	8.4507	1.40845	2.8169	142
ENSSSA1UGT003346	4.35194	2.08136	3.12204	3.8789	4.82498	3.7843	1.98675	7.00095	10.123	11.4475	3.50047	6.14948	4.06812	4.63576	5.20341	8.23084	4.91958	7.09555	1.13529	2.45979	1057
ENSSSA1UGT003347	4.69012	4.1876	1.84255	4.35511	8.20771	3.68509	3.18258	6.03015	6.86767	11.3903	1.17253	5.36013	5.02513	2.84757	6.53266	9.54774	5.19263	5.36013	1.67504	2.84757	597
ENSSSA1UGT003348	6.42674	4.24165	4.62725	5.65553	6.42674	4.88432	2.82776	7.58355	5.9126	10.5398	2.82776	4.49871	3.85604	3.72751	5.39846	7.58355	3.47044	5.78406	0.899743	2.82776	778
ENSSSA1UGT003352	7.06714	2.29682	3.18021	5.83039	5.47703	5.47703	3.18021	5.65371	6.18375	9.18728	1.41343	4.24028	5.12367	4.24028	9.36396	7.06714	5.83039	5.65371	1.06007	2.4735	566
ENSSSA1UGT003356	4.85437	3.452	1.94175	4.42287	4.96224	4.31499	2.589	5.82524	7.44337	7.87487	1.07875	5.07012	4.42287	5.39374	10.7875	11.219	4.96224	5.50162	1.18662	2.69687	927
ENSSSA1UGT003363	6.95297	1.84049	4.90798	5.93047	3.88548	6.95297	4.29448	4.49898	4.70348	11.2474	1.02249	2.45399	5.11247	4.49898	9.61145	5.52147	4.49898	6.54397	1.43149	4.08998	489
ENSSSA1UGT003370	5.95981	4.5045	3.0492	4.158	4.5738	8.10811	4.2966	4.6431	2.8413	9.42481	0.970201	3.1185	5.82121	5.33611	10.395	9.42481	3.7422	5.40541	2.3562	1.8711	1443
ENSSSA1UGT003372	2.1164	3.7037	1.0582	5.29101	3.1746	4.2328	4.7619	10.0529	3.7037	8.46561	0	5.29101	2.1164	5.29101	11.6402	11.1111	2.6455	5.29101	4.2328	5.82011	189
ENSSSA1UGT003374	3.52941	1.56863	3.92157	4.70588	4.70588	3.92157	1.96078	6.27451	5.88235	12.549	1.17647	6.27451	9.01961	3.52941	5.88235	8.23529	6.27451	5.4902	3.13725	1.96078	255
ENSSSA1UGT003375	4.67626	2.39808	5.9952	5.39568	5.7554	5.03597	2.03837	6.83453	9.11271	9.47242	2.39808	5.27578	4.31655	3.47722	5.27578	6.83453	4.67626	6.23501	1.43885	3.35731	834
ENSSSA1UGT003379	5.85586	2.02703	5.29279	7.20721	3.26577	5.51802	1.8018	6.08108	10.5856	9.7973	3.04054	5.06757	3.82883	3.71622	4.61712	6.30631	4.84234	6.53153	1.12613	3.49099	888
ENSSSA1UGT003381	4.49791	1.88285	3.76569	5.33473	5.64854	4.81172	2.92887	7.21757	6.06695	8.3682	2.92887	6.38075	5.75314	3.24268	6.38075	8.78661	5.75314	6.38075	0.941423	2.92887	956
ENSSSA1UGT003385	5.27046	1.24827	7.21221	10.1248	1.66436	4.71567	1.24827	3.19001	8.32178	7.90569	0.970874	3.32871	3.05132	3.8835	11.9279	11.9279	3.6061	5.54785	1.52566	3.32871	721
ENSSSA1UGT003388	5.14851	3.36634	1.9802	2.57426	2.17822	3.56436	2.57426	3.26733	4.45545	7.32673	1.78218	3.46535	8.11881	3.16832	13.8614	15.0495	11.1881	3.36634	2.07921	1.48515	1010
ENSSSA1UGT003389	4.56026	0.488599	1.79153	7.98046	3.4202	2.28013	2.60586	2.60586	8.63192	4.88599	1.4658	3.25733	12.3779	7.32899	3.4202	14.9837	7.98046	5.37459	0.814332	3.74593	614
ENSSSA1UGT003392	6.17284	2.46914	1.85185	8.02469	4.93827	6.17284	3.08642	4.93827	9.25926	7.40741	1.23457	5.55556	4.32099	4.93827	1.85185	7.40741	8.64198	6.17284	1.85185	3.7037	162
ENSSSA1UGT003394	11.2782	0	4.51128	3.7594	3.7594	4.51128	3.00752	6.01504	3.00752	13.5338	0.75188	6.01504	9.77444	2.25564	6.01504	7.5188	3.7594	6.76692	2.25564	1.50376	133
ENSSSA1UGT003399	3.8961	4.15584	4.67532	4.41558	6.75325	4.67532	3.63636	4.41558	8.31169	6.23377	0.779221	3.37662	4.41558	3.8961	11.6883	9.09091	4.41558	6.49351	1.2987	3.37662	385
ENSSSA1UGT003401	4.94459	3.49531	5.02984	6.30861	6.64962	3.49531	2.6428	6.39386	6.99062	10.9122	2.04604	5.11509	3.92157	4.26257	4.51833	8.7809	4.43308	5.54135	0.937766	3.58056	1173
ENSSSA1UGT003403	4.24528	2.35849	1.65094	4.12736	3.18396	3.06604	2.94811	7.1934	9.78774	12.8538	2.12264	4.24528	5.7783	5.89623	7.78302	8.96226	4.95283	5.07075	2.00472	1.76887	848
ENSSSA1UGT003405	6.68058	2.08768	5.63674	7.09812	6.68058	4.5929	1.25261	7.09812	8.35073	8.35073	1.87891	5.01044	2.92276	4.17537	4.17537	7.72443	6.26305	6.68058	0.208768	3.13152	479
ENSSSA1UGT003406	6.45161	1.29032	6.45161	8.3871	5.80645	3.87097	2.58065	4.51613	7.74194	9.67742	2.58065	6.45161	3.22581	3.87097	8.3871	8.3871	5.80645	2.58065	0	1.93548	155
ENSSSA1UGT003408	4.5582	4.2777	2.80505	3.92707	7.223	6.38149	3.29593	6.10098	5.6101	7.57363	1.54278	4.83871	4.97896	3.29593	9.67742	10.3086	6.66199	2.73492	1.89341	2.31417	1426
ENSSSA1UGT003409	3.01418	2.48227	4.96454	4.96454	6.91489	4.25532	2.48227	5.67376	7.2695	8.33333	2.83688	5.31915	5.31915	4.07801	7.0922	6.38298	6.20567	7.2695	1.77305	3.36879	564
ENSSSA1UGT003410	5.55556	1.51515	7.57576	5.55556	5.05051	4.54545	2.0202	5.55556	7.07071	7.57576	3.53535	1.51515	5.05051	7.07071	7.07071	7.07071	4.0404	8.58586	0	4.0404	198
ENSSSA1UGT003411	4.03397	2.54777	6.36943	5.52017	7.85563	3.82166	2.33546	7.431	4.03397	10.1911	3.18471	4.03397	3.18471	2.12314	4.24628	9.76645	8.06794	4.24628	1.4862	5.52017	471
ENSSSA1UGT003412	3.23034	6.03933	1.68539	3.08989	5.61798	5.05618	3.65169	6.32022	6.32022	11.9382	2.24719	3.51124	3.51124	4.07303	6.17978	12.2191	3.93258	5.33708	1.82584	4.21348	712
ENSSSA1UGT003413	2.96412	4.36817	2.65211	3.12012	6.24025	4.36817	4.05616	5.14821	5.46022	9.04836	0.312012	4.05616	6.86427	3.43214	10.7644	10.9204	4.68019	4.68019	4.21217	2.65211	641
ENSSSA1UGT003416	6.96118	4.2838	2.00803	1.33869	4.41767	4.01606	0.937082	3.74833	3.48059	5.89023	1.07095	1.74029	9.63855	1.07095	12.5837	22.7577	7.09505	3.48059	1.87416	1.60643	747
ENSSSA1UGT003417	3.04878	0.609756	6.09756	6.09756	2.7439	7.31707	1.52439	9.14634	8.23171	12.5	1.52439	9.14634	2.7439	2.43902	2.7439	6.09756	7.31707	6.40244	0.609756	3.65854	328
ENSSSA1UGT003418	5.074	3.17125	6.34249	5.49683	5.49683	5.074	3.59408	7.39958	7.82241	9.72516	1.69133	4.22833	5.074	2.11416	5.70825	4.22833	5.28541	5.074	1.69133	5.70825	473
ENSSSA1UGT003422	2.64624	3.76045	1.53203	3.20334	7.93872	1.94986	2.50696	7.66017	8.07799	13.7883	1.94986	4.87465	5.29248	4.5961	5.71031	10.585	4.17827	5.29248	1.39276	3.06407	718
ENSSSA1UGT003424	4.81283	3.20856	4.45633	4.45633	5.7041	8.3779	2.85205	4.81283	4.63458	11.0517	0.534759	3.56506	5.34759	4.27807	9.44742	8.7344	4.45633	5.34759	0.891266	3.0303	561
ENSSSA1UGT003426	9.89011	1.28205	2.38095	2.38095	6.22711	10.0733	2.5641	5.49451	1.4652	13.9194	2.74725	2.1978	4.7619	3.11355	4.21245	9.34066	6.04396	6.95971	1.28205	3.663	546
ENSSSA1UGT003428	4.7081	1.12994	5.46139	6.40301	3.20151	5.27307	2.82486	5.83804	10.5461	10.3578	3.38983	5.83804	3.38983	3.9548	4.51977	6.21469	6.21469	5.64972	0.94162	4.14313	531
ENSSSA1UGT003430	3.92157	2.6738	4.63458	7.84314	4.81283	2.85205	3.38681	7.13012	10.3387	8.55615	2.31729	8.3779	4.27807	2.6738	3.74332	7.13012	4.81283	4.99109	1.24777	4.27807	561
ENSSSA1UGT003432	5.47112	2.43161	1.21581	5.77508	5.47112	7.90274	3.03951	3.95137	9.72644	5.77508	0.911854	4.55927	2.12766	5.77508	13.6778	8.20669	6.68693	3.64742	0.607903	3.03951	329
ENSSSA1UGT003433	6.58307	1.88088	4.70219	6.26959	6.26959	5.64263	2.19436	9.09091	9.09091	9.71787	3.1348	3.44828	5.01567	3.76176	3.1348	6.58307	3.1348	4.70219	1.5674	4.07524	319
ENSSSA1UGT003434	5.81114	1.69492	4.84262	5.08475	4.35835	5.08475	3.38983	7.26392	11.138	7.99031	1.93705	4.84262	4.84262	4.35835	4.84262	7.26392	5.08475	4.60048	1.21065	4.35835	413
ENSSSA1UGT003437	4.29688	2.73438	6.64062	5.85938	6.64062	4.6875	1.95312	9.375	4.6875	10.5469	1.17188	3.51562	2.34375	3.125	5.46875	8.98438	3.51562	7.03125	1.5625	5.85938	256
ENSSSA1UGT003438	8.09859	1.76056	4.92958	7.74648	3.16901	4.92958	2.8169	5.28169	5.28169	9.15493	3.52113	3.87324	2.11268	5.28169	4.57746	7.74648	8.09859	7.74648	0.704225	3.16901	284
ENSSSA1UGT003441	3.22581	2.96774	1.93548	2.19355	5.93548	1.93548	3.22581	6.58065	8.77419	12.6452	2.83871	4.51613	3.48387	8	4.90323	9.80645	5.80645	4.3871	1.93548	4.90323	775
ENSSSA1UGT003442	5.5	1	6	6.5	6	5	2.5	6	5	8	1.5	4	6.5	1.5	6.5	8.5	5.5	10	1	3.5	200
ENSSSA1UGT003447	4.39815	3.24074	1.85185	3.24074	2.31481	5.78704	1.85185	7.40741	6.25	13.1944	2.5463	1.62037	5.78704	4.62963	9.02778	10.6481	6.01852	5.32407	2.08333	2.77778	432
ENSSSA1UGT003448	4.73934	4.2654	4.2654	9.47867	2.36967	5.21327	0.947867	5.6872	8.05687	7.58294	0	5.6872	5.6872	2.8436	1.4218	10.9005	8.05687	7.58294	1.4218	3.79147	211
ENSSSA1UGT003449	4.48276	1.2069	6.37931	7.93103	6.55172	5	1.89655	4.82759	8.44828	7.41379	2.75862	6.2069	6.55172	2.75862	4.13793	7.58621	5	5	1.2069	4.65517	580
ENSSSA1UGT003452	4.19378	2.53073	1.51844	3.03688	4.77223	3.61533	1.95228	5.27838	7.30296	12.1475	2.53073	4.26609	5.85683	3.10918	8.45987	11.8583	9.18294	4.55531	1.87997	1.95228	1383
ENSSSA1UGT003454	5.72614	1.82573	2.32365	2.98755	6.05809	3.15353	4.31535	5.3112	6.55602	9.87552	1.90871	3.40249	8.46473	2.98755	8.38174	9.79253	7.80083	4.97925	0.912863	3.23651	1205
ENSSSA1UGT003458	9.09091	2.0979	6.29371	6.29371	4.1958	4.1958	2.7972	4.8951	9.79021	8.39161	1.3986	7.69231	4.8951	2.7972	9.09091	4.1958	3.4965	4.1958	1.3986	2.7972	143
ENSSSA1UGT003459	2.83688	0.70922	7.0922	5.67376	7.0922	4.96454	0.70922	4.96454	8.51064	5.67376	0.70922	7.80142	4.96454	2.83688	9.92908	7.80142	6.38298	7.80142	0	3.5461	141
ENSSSA1UGT003460	4.62046	2.14521	3.13531	6.76568	6.10561	3.9604	2.80528	7.75578	7.09571	9.40594	2.64026	3.30033	3.9604	4.12541	4.62046	7.75578	7.26073	7.75578	0.990099	3.79538	606
ENSSSA1UGT003461	5.92885	3.55731	6.32411	8.3004	3.95257	6.32411	2.37154	3.55731	5.13834	11.0672	1.97628	4.34783	4.34783	4.34783	3.95257	6.32411	7.90514	6.71937	0.790514	2.7668	253
ENSSSA1UGT003462	5.82329	1.80723	2.40964	2.20884	12.4498	3.41365	3.21285	8.43373	5.82329	13.8554	2.20884	3.41365	2.81124	2.61044	4.21687	6.0241	4.61847	8.03213	1.40562	5.22088	498
ENSSSA1UGT003465	4.57317	3.27744	2.3628	2.66768	4.42073	4.95427	2.89634	5.4878	4.26829	7.85061	2.28659	4.19207	9.29878	2.7439	9.375	12.8811	7.54573	4.49695	1.98171	2.43902	1312
ENSSSA1UGT003466	4.70219	2.97806	2.66458	4.07524	3.76176	8.15047	5.48589	3.76176	3.60502	9.24765	1.41066	3.76176	6.73981	4.38871	12.5392	10.815	4.07524	4.38871	1.41066	2.03762	638
ENSSSA1UGT003467	9.36937	2.16216	5.04505	6.30631	4.14414	6.30631	2.16216	3.96396	4.86486	10.8108	1.8018	3.06306	3.96396	4.86486	7.92793	9.36937	5.40541	4.86486	1.98198	1.62162	555
ENSSSA1UGT003469	4.28571	3.78151	2.26891	2.52101	5.12605	3.78151	3.44538	6.80672	6.63866	12.9412	4.53782	3.61345	5.46218	5.63025	5.79832	8.40336	5.54622	5.29412	1.2605	2.85714	1190
ENSSSA1UGT003470	6.18182	0.727273	5.45455	7.27273	6.90909	7.27273	2.90909	6.54545	4.72727	7.27273	2.18182	5.09091	3.63636	3.63636	4.72727	8	4	8	1.45455	4	275
ENSSSA1UGT003471	5.32725	2.28311	1.97869	2.89193	7.45814	5.02283	2.43531	6.5449	5.17504	11.5677	1.67428	4.56621	5.32725	1.97869	6.69711	13.6986	6.24049	3.65297	1.67428	3.80518	657
ENSSSA1UGT003472	6.44217	3.3675	3.07467	7.61347	5.12445	5.56369	2.48902	5.41728	6.14934	8.49195	3.3675	4.24597	5.12445	5.12445	6.14934	8.63836	4.83163	5.41728	0.585652	2.78184	683
ENSSSA1UGT003474	4.85866	2.82686	5.12367	6.44876	7.77385	4.0636	1.32509	5.83039	7.33216	10.0707	2.29682	4.68198	4.77032	3.35689	4.0636	10.2473	5.47703	5.30035	0.795053	3.35689	1132
ENSSSA1UGT003475	4	2.4	5.6	9.6	3.2	2.4	2.4	7.2	6.4	12	2.4	3.2	1.6	6.4	6.4	9.6	3.2	5.6	1.6	4.8	125
ENSSSA1UGT003484	7.23684	0.986842	2.38487	1.80921	2.87829	26.1513	1.15132	1.89145	1.5625	3.86513	0.328947	2.54934	7.89474	4.11184	4.02961	18.5033	3.94737	2.71382	0.0822368	5.92105	1216
ENSSSA1UGT003485	3.46021	3.57555	2.76817	3.80623	5.76701	3.22953	3.34487	7.26644	8.07382	10.7266	2.53749	5.88235	4.95963	4.03691	5.53633	8.18916	6.80507	4.95963	1.61476	3.46021	867
ENSSSA1UGT003486	6.81818	0	2.27273	9.09091	1.13636	1.13636	2.27273	15.9091	5.68182	7.95455	3.40909	5.68182	4.54545	5.68182	7.95455	2.27273	9.09091	6.81818	0	2.27273	88
ENSSSA1UGT003490	8.17348	3.0025	3.50292	4.67056	5.42118	7.17264	3.41952	5.08757	4.75396	7.92327	1.41785	2.8357	6.92244	4.67056	10.342	8.00667	5.58799	4.25354	0.500417	2.33528	1199
ENSSSA1UGT003491	5.55556	1.11111	6.2963	10.3704	4.81481	2.96296	0.740741	4.44444	12.963	10.7407	1.48148	5.55556	3.33333	4.07407	5.55556	5.92593	5.18519	4.44444	1.11111	3.33333	270
ENSSSA1UGT003492	4.70588	5.88235	3.52941	4.70588	7.05882	9.41176	1.17647	4.70588	3.52941	9.41176	2.35294	4.70588	4.70588	1.17647	3.52941	11.7647	7.05882	3.52941	2.35294	4.70588	85
ENSSSA1UGT003493	6.01093	2.3224	3.27869	6.69399	3.27869	5.87432	2.04918	6.42077	5.60109	13.2514	2.73224	3.4153	3.27869	4.5082	4.91803	10.5191	5.60109	7.37705	1.22951	1.63934	732
ENSSSA1UGT003494	4.30108	1.07527	6.98925	4.83871	8.06452	4.30108	6.98925	3.22581	2.68817	10.7527	1.07527	7.52688	6.45161	2.68817	8.60215	4.30108	4.83871	5.91398	2.68817	2.68817	186
ENSSSA1UGT003496	2.5	3.33333	4.16667	5	6.25	6.66667	1.66667	7.5	7.91667	9.58333	1.25	4.16667	3.75	5	7.91667	9.16667	6.25	4.16667	0.833333	2.91667	240
ENSSSA1UGT003500	3.84615	5.44872	2.88462	3.20513	5.12821	4.16667	7.69231	3.84615	3.20513	9.9359	0.641026	5.44872	5.44872	5.44872	7.37179	10.8974	3.84615	6.08974	3.52564	1.92308	312
ENSSSA1UGT003501	5.24899	3.23015	4.44145	6.86406	4.84522	4.84522	2.69179	5.78735	6.59489	11.7093	2.01884	2.82638	5.1144	3.63392	7.53701	7.53701	4.97981	5.92194	1.3459	2.82638	743
ENSSSA1UGT003508	5.38728	2.82081	5.31792	5.68786	3.74566	6.72832	2.61272	5.7341	5.80347	12.2081	1.57225	4.55491	4.13873	3.69942	4.06936	10.9364	4.3237	6.82081	1.66474	2.17341	4325
ENSSSA1UGT003509	4.20561	3.34891	1.86916	3.11526	3.73832	4.51713	2.57009	4.6729	5.45171	9.50156	2.72586	3.11526	6.30841	3.50467	9.7352	11.6044	9.42368	5.06231	3.8162	1.7134	1284
ENSSSA1UGT003512	5.51378	3.00752	3.67586	4.42774	6.76692	4.84545	2.33918	7.35171	8.77193	9.52381	2.08855	5.84795	3.34169	3.50877	5.09607	7.76942	5.17962	5.59733	1.33668	4.01003	1197
ENSSSA1UGT003514	4.83871	3.22581	4.03226	8.06452	5.64516	8.87097	1.6129	4.83871	6.45161	8.87097	3.22581	2.41935	0.806452	4.03226	8.87097	8.06452	4.83871	6.45161	2.41935	2.41935	124
ENSSSA1UGT003515	4.82094	3.99449	2.3416	2.75482	6.88705	4.82094	2.06612	7.7135	6.88705	11.8457	2.06612	3.58127	2.89256	1.79063	8.12672	9.22865	6.06061	8.12672	1.23967	2.75482	726
ENSSSA1UGT003517	3.0303	5.30303	6.06061	3.0303	6.81818	3.0303	4.54545	7.57576	6.81818	9.09091	2.27273	7.57576	5.30303	3.0303	4.54545	6.81818	5.30303	1.51515	3.0303	5.30303	132
ENSSSA1UGT003522	6.35889	2.78746	2.70035	4.3554	4.09408	4.44251	2.70035	6.79443	6.27178	10.0174	2.70035	5.05226	3.91986	3.91986	7.5784	8.27526	7.31707	6.79443	2.09059	1.82927	1148
ENSSSA1UGT003526	6.26223	1.56556	5.28376	6.26223	6.65362	3.91389	2.54403	5.47945	5.28376	11.3503	2.73973	4.69667	6.26223	2.93542	8.21918	4.69667	4.69667	7.2407	1.36986	2.54403	511
ENSSSA1UGT003527	2.66667	2	5.33333	5.33333	4.66667	4.66667	1.33333	6	8.66667	8.66667	0.666667	7.33333	4.66667	3.33333	8	8.66667	7.33333	6	0	4.66667	150
ENSSSA1UGT003528	7.09988	2.04573	3.12876	6.25752	6.13718	4.5728	2.64741	5.5355	4.09146	10.71	2.52708	4.69314	3.97112	3.48977	6.01685	9.14561	5.65584	6.97954	1.56438	3.73045	831
ENSSSA1UGT003533	6.66667	2.35294	4.11765	4.70588	3.52941	5.68627	3.33333	4.31373	5.68627	9.41176	1.56863	5.68627	5.88235	2.94118	4.11765	10.9804	7.05882	8.82353	0.588235	2.54902	510
ENSSSA1UGT003534	3.61757	4.65116	4.39276	4.39276	5.94315	2.32558	2.84238	5.42636	5.68475	9.56072	2.84238	5.16796	5.68475	3.87597	6.20155	11.1111	5.94315	6.97674	1.03359	2.32558	387
ENSSSA1UGT003535	4.52567	2.4369	4.78677	8.79025	4.17755	4.09051	2.26284	7.48477	5.91819	9.57354	2.34987	4.26458	6.00522	3.48129	5.65709	9.13838	5.74413	5.57006	1.13142	2.61097	1149
ENSSSA1UGT003537	4.30108	1.6129	8.06452	4.83871	3.76344	5.37634	2.95699	5.37634	6.98925	9.13978	0.806452	6.98925	4.30108	2.68817	6.1828	9.4086	5.10753	8.06452	1.07527	2.95699	372
ENSSSA1UGT003540	4.86486	3.24324	3.24324	5.81081	5.81081	3.64865	3.37838	6.48649	6.75676	11.3514	2.43243	6.35135	3.91892	4.45946	4.18919	8.24324	5.13514	6.75676	0.810811	3.10811	740
ENSSSA1UGT003544	5.39773	3.83523	5.39773	6.39205	3.97727	6.67614	2.98295	6.10795	11.0795	6.96023	2.69886	5.68182	2.41477	3.83523	4.6875	5.82386	5.68182	5.11364	1.70455	3.55114	704
ENSSSA1UGT003546	6.22951	3.11475	4.59016	5.7377	5.08197	7.54098	4.7541	3.93443	2.95082	8.03279	0.983607	4.2623	5.90164	5.7377	10.9836	8.52459	3.44262	5.2459	1.31148	1.63934	610
ENSSSA1UGT003548	4.51613	4.67742	2.58065	5.16129	3.70968	4.19355	3.22581	4.83871	5.48387	8.22581	1.12903	5	6.29032	3.22581	12.0968	10.1613	5.48387	5.32258	2.74194	1.93548	620
ENSSSA1UGT003549	4.8913	2.98913	1.90217	5.43478	6.25	9.23913	2.44565	5.70652	5.16304	7.06522	2.71739	4.8913	5.70652	5.43478	8.96739	7.33696	4.8913	4.07609	1.63043	3.26087	368
ENSSSA1UGT003551	3.11111	1.77778	3.55556	3.11111	4	9.77778	3.11111	4.88889	4.44444	11.5556	1.33333	4	5.33333	2.66667	11.5556	9.33333	5.77778	4.88889	2.66667	3.11111	225
ENSSSA1UGT003552	5.56793	2.67261	2.78396	4.78842	6.68151	6.23608	2.22717	7.34967	4.67706	10.0223	3.00668	4.89978	3.78619	3.78619	5.56793	9.02004	5.902	6.4588	1.67038	2.89532	898
ENSSSA1UGT003559	4.44965	3.51288	3.27869	4.80094	7.37705	4.80094	4.33255	5.62061	5.50351	8.66511	1.05386	3.98126	3.74707	3.62998	8.54801	10.1874	6.67447	5.26932	1.63934	2.9274	854
ENSSSA1UGT003562	6.74157	2.24719	4.49438	6.74157	3.37079	4.49438	4.49438	8.98876	7.86517	3.37079	3.37079	7.86517	4.49438	3.37079	5.61798	8.98876	3.37079	8.98876	1.1236	0	89
ENSSSA1UGT003566	5.21327	4.73934	4.73934	3.79147	6.63507	4.73934	2.8436	4.02844	4.2654	10.1896	1.4218	3.79147	5.6872	4.2654	8.76777	12.5592	4.73934	5.21327	0.947867	1.4218	422
ENSSSA1UGT003567	8.88889	1.61616	3.0303	4.64646	3.0303	9.49495	3.63636	3.63636	4.24242	9.69697	2.0202	3.0303	9.29293	3.43434	8.48485	9.29293	4.24242	4.84848	1.21212	2.22222	495
ENSSSA1UGT003568	6.21039	2.28137	4.18251	4.81622	5.19645	7.35108	2.91508	7.35108	5.44994	8.99873	3.42205	4.94297	3.5488	4.56274	4.81622	7.09759	6.21039	5.83016	1.64766	3.16857	789
ENSSSA1UGT003569	4.39367	1.93322	5.44815	9.13884	3.86643	8.08436	2.81195	6.32689	10.1933	8.43585	1.23023	3.69069	2.46046	4.39367	6.67838	5.09666	4.56942	7.02988	1.58172	2.6362	569
ENSSSA1UGT003570	8.40909	2.04545	5	7.04545	5	3.86364	2.95455	4.54545	3.40909	9.09091	2.27273	7.04545	5.90909	4.31818	8.63636	3.63636	5.22727	7.27273	0.909091	3.40909	440
ENSSSA1UGT003572	6.19048	1.90476	5.71429	6.42857	5.71429	5	2.61905	6.90476	7.61905	8.80952	2.85714	2.85714	4.04762	2.14286	6.19048	7.85714	6.42857	3.80952	1.42857	5.47619	420
ENSSSA1UGT003577	3.33333	3.44828	1.37931	3.90805	4.02299	8.27586	0.689655	6.66667	8.73563	8.62069	3.10345	3.44828	3.21839	2.98851	10.3448	10.3448	6.78161	5.97701	2.98851	1.72414	870
ENSSSA1UGT003578	4.77137	3.57853	7.35586	7.15706	3.57853	4.37376	3.97614	5.96421	7.75348	9.34394	2.18688	4.37376	4.57256	3.57853	3.97614	4.77137	4.17495	10.338	1.39165	2.7833	503
ENSSSA1UGT003579	3.77358	3.01887	1.50943	6.79245	4.15094	2.64151	2.64151	2.64151	9.0566	15.4717	3.01887	5.66038	2.64151	4.5283	4.90566	10.566	5.66038	6.41509	1.88679	3.01887	265
ENSSSA1UGT003584	5.97964	4.70738	5.59796	7.25191	5.08906	4.83461	3.05344	5.34351	8.90585	6.743	2.4173	5.08906	4.96183	4.45293	5.21628	6.36132	3.94402	5.59796	1.27226	3.18066	786
ENSSSA1UGT003586	5.95855	2.84974	5.31088	4.53368	6.08808	5.69948	2.59067	6.21762	5.82902	11.399	1.68394	4.27461	4.01554	3.49741	5.56995	7.38342	6.60622	6.34715	1.42487	2.72021	772
ENSSSA1UGT003588	2.70677	2.25564	4.21053	6.61654	8.27068	3.45865	3.30827	6.01504	10.2256	10.9774	2.25564	4.3609	2.25564	3.00752	6.46617	8.1203	4.96241	5.26316	0.601504	4.66165	665
ENSSSA1UGT003589	3.66972	3.82263	2.29358	5.35168	3.66972	9.32722	0.611621	4.74006	7.03364	11.0092	1.98777	3.66972	2.9052	3.21101	11.1621	10.0917	5.65749	4.89297	3.21101	1.68196	654
ENSSSA1UGT003591	5.59006	2.27743	6.00414	3.31263	5.7971	4.96894	2.48447	6.00414	6.21118	11.8012	1.0352	2.89855	7.24638	3.31263	4.55487	9.31677	4.34783	8.07453	0.828157	3.93375	483
ENSSSA1UGT003593	11.0169	2.33051	3.2839	7.41525	4.13136	5.29661	1.69492	4.55508	6.25	8.36864	1.27119	4.23729	4.66102	2.64831	6.25	7.09746	8.89831	8.05085	0.95339	1.58898	944
ENSSSA1UGT003594	9.7561	0.914634	5.4878	3.96341	7.0122	5.79268	4.57317	5.18293	5.18293	10.3659	2.7439	3.35366	4.26829	1.52439	4.57317	6.09756	5.4878	4.26829	3.35366	6.09756	328
ENSSSA1UGT003596	6.69145	2.97398	1.85874	2.04461	5.01859	4.46097	3.15985	7.62082	5.39033	12.6394	1.48699	3.34572	5.20446	5.57621	4.46097	8.17844	8.36431	6.50558	1.30112	3.71747	538
ENSSSA1UGT003597	10.9195	1.72414	6.32184	6.89655	3.44828	7.47126	1.14943	5.74713	5.74713	10.9195	1.14943	2.29885	2.87356	4.02299	4.5977	5.17241	5.17241	8.62069	1.72414	4.02299	174
ENSSSA1UGT003602	4.41767	0.803213	2.40964	11.6466	5.62249	2.00803	0.803213	8.03213	10.0402	10.4418	1.60643	4.81928	5.22088	4.81928	4.41767	7.22892	4.81928	6.0241	1.20482	3.61446	249
ENSSSA1UGT003604	6.63717	2.50737	3.9823	5.01475	7.81711	5.89971	2.35988	6.78466	6.48968	10.3245	1.32743	4.57227	3.39233	3.39233	4.57227	8.55457	5.01475	7.37463	1.62242	2.35988	678
ENSSSA1UGT003608	4.53216	2.48538	2.48538	4.38596	6.28655	4.53216	2.92398	8.33333	6.14035	11.9883	2.63158	4.38596	5.11696	3.21637	4.23977	9.64912	5.26316	6.87135	0.877193	3.65497	684
ENSSSA1UGT003611	5.34682	2.45665	4.62428	7.51445	3.90173	4.91329	3.3237	4.62428	5.92486	8.67052	2.45665	3.3237	9.82659	4.04624	6.06936	7.51445	3.61272	6.6474	2.02312	3.17919	692
ENSSSA1UGT003616	4.70682	4.74671	2.63263	4.30794	5.66414	5.4647	4.30794	4.74671	5.02593	7.33945	0.757878	4.98604	4.22816	5.26526	8.29677	12.1659	4.90626	4.90626	1.91464	3.62984	2507
ENSSSA1UGT003620	5.90717	4.21941	5.90717	7.59494	7.59494	3.79747	2.95359	4.64135	5.06329	9.70464	1.26582	5.90717	3.79747	3.79747	2.1097	10.1266	3.79747	9.2827	0.421941	2.1097	237
ENSSSA1UGT003623	6.0166	3.94191	3.52697	2.90456	1.45228	7.05394	3.11203	3.73444	4.97925	10.7884	1.24481	3.3195	8.71369	3.52697	10.9959	10.9959	6.43154	2.28216	2.48963	2.48963	482
ENSSSA1UGT003625	4.91228	1.05263	7.01754	4.91228	2.80702	6.31579	3.15789	3.85965	6.31579	10.5263	2.10526	3.15789	6.66667	3.50877	8.07018	7.01754	4.91228	8.07018	2.45614	3.15789	285
ENSSSA1UGT003626	8.08729	2.18228	5.90501	5.39153	3.08087	8.34403	3.08087	4.36457	3.97946	8.72914	2.56739	3.59435	6.16175	3.59435	4.87805	7.70218	6.16175	8.08729	1.54044	2.56739	779
ENSSSA1UGT003627	7.66129	2.21774	6.04839	5.04032	4.6371	8.87097	2.41935	3.42742	5.04032	7.66129	1.81452	3.83065	6.65323	1.81452	7.66129	11.0887	5.64516	5.84677	0.604839	2.01613	496
ENSSSA1UGT003632	8.35031	1.83299	6.31365	9.36864	3.25866	4.07332	2.03666	6.10998	8.75764	13.0346	2.44399	5.70265	2.85132	2.03666	3.66599	6.72098	3.46232	6.10998	0.407332	3.46232	491
ENSSSA1UGT003635	5.07426	3.71287	2.47525	3.09406	9.28218	3.58911	2.10396	8.29208	4.82673	13.7376	1.48515	5.19802	4.08416	3.58911	5.56931	10.8911	3.83663	5.19802	0.866337	3.09406	808
ENSSSA1UGT003636	3.17965	3.97456	2.38474	4.13355	4.13355	8.10811	2.22576	5.24642	7.3132	9.69793	2.86169	2.22576	2.86169	2.7027	10.8108	12.0827	6.67727	4.76948	2.86169	1.74881	629
ENSSSA1UGT003638	5.20382	4.5967	2.42845	4.16305	3.81613	6.15785	4.94363	3.38248	3.7294	8.15265	0.693842	4.16305	4.77016	6.50477	11.2749	11.7086	5.81093	5.20382	1.47441	1.82134	1153
ENSSSA1UGT003642	5.88235	3.52941	7.05882	4.70588	7.05882	7.05882	3.52941	10.5882	5.88235	7.05882	2.35294	3.52941	0	3.52941	9.41176	4.70588	4.70588	7.05882	1.17647	1.17647	85
ENSSSA1UGT003643	2.47934	3.0303	1.65289	3.44353	6.61157	4.40771	2.75482	6.74931	8.53994	11.708	2.47934	5.09642	5.23416	4.13223	3.58127	10.1928	5.50964	7.16253	1.51515	3.71901	726
ENSSSA1UGT003645	6.18375	2.29682	5.47703	6.18375	4.59364	4.59364	3.35689	7.95053	6.36042	8.83392	2.65018	4.77032	5.47703	2.29682	4.41696	11.3074	3.53357	6.36042	1.06007	2.29682	566
ENSSSA1UGT003649	7.17017	1.52964	7.36138	5.92734	4.78011	4.3021	2.67686	4.39771	5.64054	9.65583	1.14723	5.16252	4.87572	3.72849	4.97132	8.69981	5.83174	7.36138	1.24283	3.53728	1046
ENSSSA1UGT003651	6.45527	1.359	2.49151	3.05776	5.54926	7.47452	2.03851	7.47452	2.49151	10.872	2.15176	4.41676	6.68177	4.19026	5.32276	9.73952	5.20951	7.70102	2.03851	3.28426	883
ENSSSA1UGT003656	4.6133	1.49254	7.59837	8.68385	5.56309	4.20624	1.62822	5.69878	9.63365	9.49796	3.12076	5.97015	3.79919	3.25645	5.97015	7.327	3.25645	4.74898	0.678426	3.25645	737
ENSSSA1UGT003658	5.99078	1.84332	5.06912	9.67742	2.30415	2.76498	0.921659	6.45161	11.9816	10.5991	1.38249	1.84332	6.45161	5.52995	7.37327	5.99078	4.14747	4.14747	1.84332	3.68664	217
ENSSSA1UGT003660	6.57277	1.40845	1.87793	2.34742	4.69484	3.75587	2.8169	6.10329	7.04225	8.4507	2.34742	3.28638	11.2676	3.75587	6.57277	7.51174	10.3286	7.04225	1.40845	1.40845	213
ENSSSA1UGT003662	5.59701	3.60697	5.47264	5.34826	5.47264	9.82587	2.61194	3.9801	4.60199	8.83085	1.74129	3.9801	5.34826	4.22886	7.33831	6.71642	4.10448	6.21891	1.61692	3.35821	804
ENSSSA1UGT003664	6.10687	0.763359	3.05344	5.08906	4.58015	3.05344	5.34351	6.10687	6.61578	13.2316	1.27226	2.29008	5.59796	2.03562	5.59796	11.1959	4.83461	7.37913	3.30789	2.54453	393
ENSSSA1UGT003669	3.97456	2.06677	2.7027	5.88235	3.49762	6.99523	4.29253	3.97456	3.97456	10.9698	0.953895	4.45151	4.45151	5.40541	14.4674	8.90302	4.13355	3.33863	1.90779	3.6566	629
ENSSSA1UGT003672	7.35931	2.1645	7.35931	5.62771	4.7619	7.79221	1.7316	6.49351	6.49351	6.49351	2.1645	3.8961	3.0303	4.329	5.19481	7.35931	6.92641	5.62771	0.865801	4.329	231
ENSSSA1UGT003673	6.77382	1.72216	3.2147	4.24799	7.00344	6.19977	1.95178	7.80712	4.70723	9.87371	2.87026	3.90356	3.90356	1.49254	4.70723	8.7256	5.16648	7.5775	2.52583	5.62572	871
ENSSSA1UGT003676	5.81175	3.22173	3.91661	5.87492	3.66393	5.0537	3.85344	3.41124	3.53759	7.4542	0.758054	3.66393	6.31712	5.87492	12.0025	10.3601	5.43272	4.99052	2.59002	2.21099	1583
ENSSSA1UGT003678	6.00316	0.789889	4.73934	5.6872	3.47551	2.52765	1.73776	4.42338	12.0063	7.109	1.89573	5.52923	7.26698	4.42338	7.89889	9.79463	7.42496	5.6872	0.631912	0.947867	633
ENSSSA1UGT003679	4.55927	0.911854	5.77508	8.20669	4.55927	3.34347	2.12766	7.90274	12.1581	8.81459	1.82371	4.55927	2.43161	3.03951	7.29483	3.64742	3.95137	6.38298	2.12766	6.38298	329
ENSSSA1UGT003681	3.16056	4.04551	2.14918	2.2756	6.57396	3.03413	2.78129	8.09102	5.81542	14.2857	1.26422	4.80405	4.29836	4.42478	3.91909	8.72314	6.06827	6.95322	1.76991	5.56258	791
ENSSSA1UGT003682	5.27497	2.24467	4.82604	6.95847	6.17284	5.61167	2.91807	4.93827	6.39731	12.3457	0.897868	3.92817	4.93827	4.82604	4.60157	6.39731	5.49944	6.17284	1.23457	3.81594	891
ENSSSA1UGT003685	4.78413	2.91715	3.61727	3.96733	7.00117	5.60093	3.73396	5.48425	5.48425	9.56826	1.28355	5.13419	3.61727	3.50058	8.28471	9.2182	6.65111	5.48425	1.86698	2.80047	857
ENSSSA1UGT003686	4.92958	2.8169	5.6338	5.28169	3.87324	6.33803	4.22535	3.16901	4.57746	12.3239	1.05634	7.04225	4.57746	3.16901	3.87324	8.80282	3.87324	7.74648	3.16901	3.52113	284
ENSSSA1UGT003689	4.90798	1.99387	5.9816	6.44172	8.12883	3.83436	3.22086	6.28834	4.7546	11.3497	1.53374	5.52147	3.06748	2.45399	4.29448	10.2761	5.9816	5.67485	1.07362	3.22086	652
ENSSSA1UGT003690	9.77011	5.17241	1.14943	10.3448	5.17241	4.02299	1.72414	5.74713	8.04598	8.04598	1.14943	4.02299	6.89655	2.87356	2.29885	10.3448	7.47126	4.02299	0.574713	1.14943	174
ENSSSA1UGT003696	6.36042	1.76678	3.71025	6.00707	4.947	4.0636	2.29682	6.00707	6.5371	9.18728	1.06007	4.24028	10.2473	4.0636	8.30389	7.77385	5.65371	4.77032	1.76678	1.23675	566
ENSSSA1UGT003698	5.17121	2.37596	4.12299	5.24109	3.42418	6.63871	2.16632	4.40252	4.8218	8.94479	1.88679	4.61216	7.26765	3.98323	5.24109	11.6702	6.49895	6.91824	1.18798	3.42418	1431
ENSSSA1UGT003699	5.59611	1.70316	4.13625	5.83942	4.13625	4.62287	3.64964	6.32603	9.00243	13.1387	1.45985	3.40633	4.13625	3.16302	7.78589	6.81265	4.13625	5.3528	1.94647	3.64964	411
ENSSSA1UGT003702	4.81728	2.32558	6.14618	5.81395	6.47841	4.15282	2.65781	6.31229	6.31229	11.4618	1.3289	4.65116	3.32226	4.15282	4.65116	10.4651	5.31561	6.31229	0.830565	2.49169	602
ENSSSA1UGT003703	2.04082	6.12245	7.14286	6.12245	3.06122	6.12245	2.04082	7.14286	4.08163	10.2041	1.02041	6.12245	3.06122	3.06122	4.08163	15.3061	3.06122	6.12245	1.02041	3.06122	98
ENSSSA1UGT003705	5.29101	1.0582	2.99824	3.52734	5.64374	8.11287	2.6455	5.46737	6.52557	7.05467	0.352734	2.82187	10.7584	3.7037	4.93827	11.4638	3.35097	4.7619	1.5873	7.93651	567
ENSSSA1UGT003707	4.70588	2.94118	2.94118	2.94118	10.5882	2.35294	2.35294	8.82353	4.70588	10.5882	2.35294	4.70588	4.11765	2.35294	6.47059	4.70588	9.41176	7.05882	1.76471	4.11765	170
ENSSSA1UGT003709	5.52017	4.24628	3.60934	5.52017	5.73248	4.88323	3.18471	5.30786	7.00637	8.06794	2.33546	3.82166	6.36943	3.18471	8.49257	7.21868	4.4586	6.58174	1.27389	3.18471	471
ENSSSA1UGT003719	5.21277	1.70213	4.57447	3.61702	4.57447	5.53191	2.44681	6.70213	4.89362	10.1064	1.2766	7.34043	6.17021	3.29787	6.38298	10.4255	4.68085	5.10638	1.17021	4.78723	940
ENSSSA1UGT003727	5.05051	4.0404	5.55556	5.05051	6.56566	5.55556	5.05051	7.07071	7.07071	11.6162	1.0101	4.54545	2.0202	1.51515	5.05051	7.57576	5.05051	5.55556	0.505051	4.54545	198
ENSSSA1UGT003729	5.75816	3.55086	1.53551	2.97505	4.41459	3.26296	2.68714	3.83877	5.75816	13.1478	2.39923	2.59117	6.81382	6.14203	7.10173	10.8445	5.56622	7.00576	2.20729	2.39923	1042
ENSSSA1UGT003730	7.39261	1.998	3.7962	5.09491	5.19481	6.59341	3.4965	6.09391	4.7952	8.59141	3.7962	4.1958	5.49451	3.1968	6.09391	7.39261	5.99401	6.49351	1.3986	2.8971	1001
ENSSSA1UGT003731	5.97303	2.89017	2.11946	4.4316	6.35838	5.97303	3.46821	3.85356	5.39499	10.2119	0.578035	3.08285	8.47784	4.62428	13.6802	7.12909	3.66089	5.78035	0.578035	1.7341	519
ENSSSA1UGT003732	5.86166	1.99297	4.68933	6.3306	3.39977	7.62016	2.8136	4.9238	8.7925	9.96483	2.4619	5.04103	5.2755	3.28253	5.15826	5.39273	5.39273	7.7374	1.4068	2.4619	853
ENSSSA1UGT003740	3.43249	2.51716	1.83066	3.20366	6.86499	4.11899	2.746	6.63616	6.40732	10.0686	2.51716	4.34783	3.89016	3.89016	8.46682	11.8993	7.78032	3.43249	2.746	3.20366	437
ENSSSA1UGT003744	6.20155	2.32558	1.55039	4.26357	4.65116	9.30233	1.93798	1.93798	6.58915	10.4651	1.16279	5.03876	5.81395	2.71318	8.52713	12.4031	7.36434	4.65116	2.32558	0.775194	258
ENSSSA1UGT003746	3.86965	2.85132	0.610998	2.64766	5.70265	2.44399	3.86965	8.55397	11.8126	12.6273	6.72098	3.66599	2.85132	2.64766	5.70265	8.35031	7.53564	3.25866	0.814664	3.46232	491
ENSSSA1UGT003747	1.45631	3.8835	2.91262	3.39806	7.03883	2.42718	0.970874	8.25243	11.6505	11.8932	3.64078	5.33981	2.6699	3.64078	5.58252	9.70874	4.61165	5.58252	0.970874	4.36893	412
ENSSSA1UGT003750	2.2869	4.3659	6.23701	3.1185	4.9896	4.7817	4.5738	5.82121	4.5738	10.1871	1.4553	4.7817	4.158	4.5738	12.6819	9.14761	3.5343	3.5343	1.8711	3.3264	481
ENSSSA1UGT003751	7.33591	2.7027	2.7027	6.94981	4.2471	7.72201	3.0888	6.17761	5.40541	9.26641	1.9305	2.3166	5.01931	4.6332	5.40541	11.1969	5.01931	5.01931	1.1583	2.7027	259
ENSSSA1UGT003754	7.05596	1.45985	4.62287	9.48905	5.3528	2.91971	2.18978	7.05596	7.78589	11.1922	2.43309	3.89294	2.6764	6.81265	5.10949	6.08273	2.91971	7.05596	0.729927	3.16302	411
ENSSSA1UGT003755	4.67836	4.09357	2.33918	3.89864	5.26316	5.65302	3.50877	5.45809	5.84795	9.35673	2.92398	3.7037	4.2885	2.92398	9.74659	11.501	4.09357	5.65302	1.75439	3.31384	513
ENSSSA1UGT003756	4.26136	2.55682	4.54545	9.09091	5.11364	3.125	1.98864	5.96591	8.80682	11.0795	2.27273	5.96591	5.96591	2.27273	5.11364	7.95455	4.26136	4.54545	2.27273	2.84091	352
ENSSSA1UGT003758	4.29104	1.49254	5.78358	9.70149	1.86567	3.17164	1.1194	6.34328	12.3134	9.14179	3.17164	5.22388	4.85075	3.91791	4.10448	11.3806	5.78358	3.73134	0.746269	1.86567	536
ENSSSA1UGT003761	5.18207	3.36134	3.08123	5.18207	6.86275	3.78151	3.08123	7.0028	6.72269	10.9244	1.40056	5.46218	3.78151	4.20168	6.44258	9.94398	4.7619	5.18207	0.840336	2.80112	714
ENSSSA1UGT003764	5.36278	2.2082	3.47003	6.62461	4.4164	3.47003	2.52366	5.04732	7.88644	8.20189	0.946372	5.67823	5.36278	3.78549	8.51735	11.6719	4.4164	5.67823	1.57729	3.15457	317
ENSSSA1UGT003765	4.35754	4.9162	2.23464	4.80447	5.81006	6.70391	2.68156	7.15084	5.36313	8.82682	2.23464	4.80447	5.02793	4.13408	5.47486	9.38547	5.81006	5.02793	2.01117	3.24022	895
ENSSSA1UGT003766	5.81395	3.29457	4.45736	1.93798	4.26357	5.81395	4.26357	4.84496	4.45736	8.13953	1.35659	3.68217	6.78295	4.65116	12.4031	9.88372	6.20155	4.06977	1.74419	1.93798	516
ENSSSA1UGT003767	4.85437	2.79126	1.69903	3.76214	7.76699	3.64078	3.03398	6.67476	5.09709	9.70874	1.57767	4.73301	3.64078	3.64078	7.40291	13.1068	5.09709	6.06796	1.82039	3.8835	824
ENSSSA1UGT003768	6.56934	1.94647	3.28467	6.691	5.10949	3.89294	1.58151	7.66423	7.42092	8.63747	1.94647	4.98783	3.28467	2.91971	6.08273	8.75912	5.96107	8.39416	0.729927	4.13625	822
ENSSSA1UGT003769	3.14815	2.96296	1.11111	2.77778	6.48148	4.44444	2.22222	7.22222	7.03704	12.2222	2.59259	5.74074	5.37037	4.25926	7.22222	8.88889	5.92593	4.25926	1.85185	4.25926	540
ENSSSA1UGT003770	15.6627	0	6.0241	6.62651	1.80723	6.62651	0	6.0241	0.60241	9.03614	0	6.0241	11.4458	1.20482	0.60241	13.253	12.0482	3.01205	0	0	166
ENSSSA1UGT003777	2.72727	2.72727	6.36364	9.09091	4.54545	8.18182	2.72727	5.45455	10	11.8182	1.81818	2.72727	4.54545	1.81818	9.09091	4.54545	5.45455	4.54545	0.909091	0.909091	110
ENSSSA1UGT003778	2.80811	5.77223	2.34009	3.58814	5.61622	4.36817	4.9922	4.68019	4.9922	11.0764	1.24805	3.43214	4.05616	5.92824	7.02028	11.2324	4.68019	4.36817	4.05616	3.74415	641
ENSSSA1UGT003779	6.15142	2.99685	5.5205	3.3123	4.4164	7.72871	2.36593	6.46688	5.04732	8.04416	0.946372	6.94006	5.5205	3.3123	2.83912	10.2524	7.09779	6.15142	1.89274	2.99685	634
ENSSSA1UGT003781	4.81752	2.18978	4.37956	6.86131	3.50365	5.54745	2.33577	6.42336	6.42336	8.32117	1.75182	4.52555	6.42336	3.21168	4.37956	9.78102	7.73723	7.0073	1.89781	2.48175	685
ENSSSA1UGT003784	6.71378	2.4735	3.53357	3.41578	3.53357	7.30271	5.41814	4.47585	3.41578	9.18728	1.29564	3.18021	9.06949	4.35807	10.8363	8.12721	4.1225	5.88928	1.29564	2.35571	849
ENSSSA1UGT003785	8.25688	0.917431	4.58716	2.29358	5.04587	4.58716	2.29358	9.63303	1.83486	10.0917	1.37615	4.58716	6.88073	6.42202	0.458716	10.5505	5.50459	8.7156	1.37615	4.58716	218
ENSSSA1UGT003786	4.16667	5	2.97619	3.92857	4.7619	4.40476	3.57143	4.40476	6.78571	8.21429	1.30952	5.59524	5.95238	7.14286	7.02381	10.3571	4.64286	4.16667	1.66667	3.92857	840
ENSSSA1UGT003787	9.73451	2.65487	5.30973	3.53982	3.53982	6.19469	3.53982	7.07965	5.30973	12.3894	1.76991	5.30973	2.65487	2.65487	8.84956	6.19469	7.9646	4.42478	0.884956	0	113
ENSSSA1UGT003789	8.42621	1.64958	5.84039	7.80205	3.74498	6.50914	1.60499	5.30539	7.75747	10.9229	1.56041	4.01248	4.36915	5.48373	6.06331	5.34998	4.85956	5.52831	0.802497	2.40749	2243
ENSSSA1UGT003795	4.11822	1.88953	5.7655	7.21899	4.26357	4.11822	2.56783	4.69961	6.20155	10.0775	1.64729	4.26357	5.91085	3.68217	5.57171	13.469	5.28101	5.81395	0.581395	2.85853	2064
ENSSSA1UGT003802	2.94118	2.6738	6.14973	3.20856	6.95187	2.6738	3.20856	7.21925	8.55615	10.4278	3.47594	3.20856	4.54545	2.94118	3.20856	9.35829	5.61497	9.09091	1.3369	3.20856	374
ENSSSA1UGT003804	5.08834	3.32155	3.32155	4.02827	4.02827	6.36042	3.53357	5.01767	5.58304	9.04594	1.34276	5.9364	5.72438	4.4523	9.89399	9.25795	4.80565	4.24028	1.83746	3.18021	1415
ENSSSA1UGT003805	7.12773	2.25829	5.01059	8.53917	3.38744	5.50459	2.75229	5.85745	7.33945	11.0797	1.62315	3.38744	3.95201	3.45801	7.83345	7.33945	4.7283	5.01059	0.84686	2.96401	1417
ENSSSA1UGT003806	5.82677	5.51181	3.14961	5.03937	5.03937	5.82677	2.20472	3.62205	3.77953	9.44882	0.472441	3.77953	6.29921	5.82677	12.126	10.2362	4.25197	4.25197	1.41732	1.88976	635
ENSSSA1UGT003808	7.33496	4.15648	4.88998	2.68949	4.40098	6.11247	0.733496	4.88998	1.95599	10.7579	2.20049	5.13447	9.04645	1.95599	9.29095	10.0244	3.66748	6.84597	1.95599	1.95599	409
ENSSSA1UGT003809	5.91398	2.90323	3.97849	2.47312	6.77419	4.51613	3.65591	6.77419	4.73118	12.043	2.36559	3.97849	3.44086	3.11828	5.5914	8.60215	6.12903	6.45161	2.15054	4.4086	930
ENSSSA1UGT003811	4.02194	3.29068	5.11883	6.94698	5.48446	5.11883	2.01097	4.38757	7.86106	9.5064	2.3766	6.39854	3.83912	4.57038	4.93601	10.2377	4.20475	7.1298	1.27971	1.27971	547
ENSSSA1UGT003819	1.5544	3.62694	6.21762	6.21762	3.10881	5.18135	1.5544	6.21762	8.80829	7.77202	3.62694	5.69948	3.62694	2.59067	4.66321	10.8808	5.69948	8.80829	1.03627	3.10881	193
ENSSSA1UGT003822	5.03876	1.29199	5.74935	8.01034	3.29457	7.23514	2.06718	4.45736	5.23256	7.75194	1.22739	5.94315	3.29457	4.52196	7.10594	11.6279	4.65116	6.33075	1.09819	4.06977	1548
ENSSSA1UGT003825	4.22139	3.09568	3.18949	5.25328	6.28518	5.4409	4.03377	5.72233	5.62852	7.87992	1.03189	4.59662	4.40901	6.09756	8.63039	10.3189	5.62852	4.03377	1.31332	3.18949	1066
ENSSSA1UGT003831	7.08661	2.44094	5.98425	7.24409	3.14961	5.19685	2.75591	5.74803	6.29921	12.5197	1.73228	3.77953	3.85827	4.33071	6.77165	7.71654	5.19685	4.80315	0.787402	2.59843	1270
ENSSSA1UGT003834	5.28169	2.46479	5.28169	8.4507	2.8169	3.52113	2.46479	6.69014	7.39437	10.5634	3.16901	3.16901	4.92958	4.22535	8.09859	9.85915	2.11268	6.69014	1.05634	1.76056	284
ENSSSA1UGT003837	3.698	4.39137	2.15716	5.39291	5.0077	5.46995	4.85362	5.16179	5.9322	11.0169	1.30971	5.08475	3.92912	4.54545	7.93529	8.62866	4.93066	5.62404	2.08012	2.85054	1298
ENSSSA1UGT003839	3.05344	3.56234	1.65394	3.56234	6.2341	4.19847	2.4173	6.48855	6.10687	10.0509	1.9084	4.07125	4.96183	3.56234	8.90585	11.3232	7.88804	4.45293	2.54453	3.05344	786
ENSSSA1UGT003844	4.74576	2.0339	2.71186	7.79661	5.42373	5.42373	2.37288	7.79661	6.77966	8.81356	1.01695	6.44068	6.10169	3.05085	2.71186	6.44068	6.77966	9.15254	0	4.40678	295
ENSSSA1UGT003847	0.917431	5.04587	1.37615	1.37615	5.50459	2.29358	3.21101	6.88073	8.25688	11.0092	4.58716	7.33945	4.58716	1.37615	8.7156	10.0917	5.9633	5.9633	2.29358	3.21101	218
ENSSSA1UGT003848	5.04202	5.04202	1.2605	2.73109	5.88235	6.09244	3.78151	3.9916	3.15126	9.03361	2.73109	4.41176	3.36134	5.46218	13.0252	9.2437	7.14286	2.73109	2.73109	3.15126	476
ENSSSA1UGT003849	3.59281	6.88623	3.59281	2.99401	5.38922	4.19162	3.89222	5.68862	4.79042	14.9701	2.09581	2.09581	4.49102	2.69461	3.59281	13.7725	3.29341	7.18563	2.09581	2.69461	334
ENSSSA1UGT003852	5.24476	3.32168	5.41958	4.54545	6.29371	7.34266	2.44755	6.64336	8.04196	8.21678	2.62238	2.44755	4.72028	3.32168	6.11888	6.81818	6.29371	5.59441	2.27273	2.27273	572
ENSSSA1UGT003854	4.12371	1.54639	3.09278	5.6701	8.24742	4.63918	6.18557	2.57732	10.3093	12.3711	2.57732	6.70103	3.60825	4.63918	3.60825	9.27835	4.12371	4.63918	0	2.06186	194
ENSSSA1UGT003858	6.25	0.94697	5.87121	9.65909	3.2197	4.16667	2.65152	3.97727	3.2197	10.9848	2.46212	3.78788	6.43939	6.43939	10.0379	6.06061	4.35606	5.49242	0.94697	3.0303	528
ENSSSA1UGT003859	3.33333	2.85714	3.57143	3.57143	5	4.28571	2.14286	6.90476	8.09524	8.33333	2.85714	4.04762	6.19048	4.52381	9.7619	7.61905	6.90476	4.52381	1.42857	4.04762	420
ENSSSA1UGT003866	5.20833	2.08333	5.20833	9.375	1.04167	7.29167	3.125	4.16667	6.25	6.25	2.08333	5.20833	3.125	4.16667	3.125	10.4167	2.08333	9.375	2.08333	8.33333	96
ENSSSA1UGT003868	3.7037	2.46914	3.7037	8.02469	9.5679	4.01235	0.617284	7.71605	4.93827	11.4198	3.39506	4.32099	2.77778	3.39506	5.55556	9.5679	2.46914	8.64198	1.23457	2.46914	324
ENSSSA1UGT003869	2.6178	1.83246	6.28272	10.2094	5.2356	5.2356	2.35602	4.18848	6.80628	8.11518	2.09424	6.02094	3.14136	6.28272	6.28272	6.80628	3.66492	5.2356	1.3089	6.28272	382
ENSSSA1UGT003870	4.53834	3.59937	1.56495	5.16432	6.25978	3.44288	1.56495	6.10329	7.98122	10.7981	1.87793	4.85133	4.38185	4.22535	7.35524	10.7981	5.47731	6.10329	1.40845	2.50391	639
ENSSSA1UGT003875	3.97351	4.63576	1.3245	6.95364	5.96026	4.63576	5.96026	6.62252	3.97351	6.95364	1.3245	6.29139	4.30464	4.30464	9.27152	7.28477	4.63576	5.96026	2.98013	2.64901	302
ENSSSA1UGT003877	22.1239	0.176991	0.707965	0.353982	7.61062	23.1858	0.353982	2.30088	0	7.07965	0.353982	0.353982	7.43363	0.530973	8.49558	8.14159	0.884956	2.47788	7.43363	0	565
ENSSSA1UGT003878	5.15933	1.6692	4.85584	4.7041	3.64188	4.85584	1.6692	6.82853	9.25645	8.19423	2.42792	6.22155	8.34598	5.00759	3.0349	10.3187	5.00759	5.15933	0.758725	2.88316	659
ENSSSA1UGT003880	5.21542	4.53515	5.21542	5.89569	4.53515	5.21542	2.04082	5.44218	8.61678	8.84354	0.453515	6.34921	4.7619	6.34921	4.53515	7.48299	3.62812	8.84354	0.453515	1.5873	441
ENSSSA1UGT003881	5.09761	2.38612	4.44685	5.85683	4.98915	7.15835	2.60304	5.31453	8.56833	10.7375	1.19306	4.33839	5.63991	3.14534	4.66377	9.43601	6.07375	4.98915	1.6269	1.73536	922
ENSSSA1UGT003882	4.46352	2.23176	6.43777	5.06438	5.66524	2.48927	4.29185	4.80687	6.78112	10.3863	1.97425	3.51931	3.86266	5.49356	5.32189	10.2146	5.5794	6.86695	1.03004	3.51931	1165
ENSSSA1UGT003883	4.60829	2.53456	3.68664	7.25806	6.2212	4.37788	2.41935	5.64516	6.45161	10.5991	0.806452	5.99078	3.91705	3.91705	6.2212	11.6359	5.29954	5.29954	1.03687	2.07373	868
ENSSSA1UGT003886	6.11354	3.05677	3.05677	3.63901	4.94905	7.86026	2.32897	5.24017	4.94905	8.87918	1.16448	4.94905	5.38574	4.51237	6.9869	7.27802	4.94905	8.00582	1.89229	4.80349	687
ENSSSA1UGT003891	4.6729	2.64798	3.42679	4.20561	5.29595	5.29595	3.42679	4.98442	6.23053	9.19003	0.934579	6.23053	3.27103	5.14019	10.2804	13.2399	3.27103	4.20561	1.24611	2.80374	642
ENSSSA1UGT003892	6.32479	1.7094	5.12821	4.44444	5.12821	5.98291	3.4188	7.69231	6.83761	8.37607	2.05128	4.78632	4.61538	2.73504	6.32479	6.15385	4.61538	8.20513	0.512821	4.95726	585
ENSSSA1UGT003898	7.78816	4.04984	3.42679	4.6729	3.73832	8.72274	2.49221	5.60748	3.11526	10.5919	2.18069	4.98442	5.29595	2.18069	7.78816	7.78816	4.98442	6.54206	1.55763	2.49221	321
ENSSSA1UGT003902	4.5738	2.39085	3.43035	5.19751	7.48441	4.46985	2.59875	6.54886	7.06861	10.0832	2.80665	6.13306	3.63825	3.22245	5.61331	6.86071	6.02911	6.13306	1.0395	4.67775	962
ENSSSA1UGT003903	5.11182	2.39617	5.35144	6.23003	4.07348	3.67412	1.91693	7.1885	9.74441	10.2236	1.19808	5.7508	5.19169	4.3131	4.23323	7.34824	4.71246	6.54952	0.71885	4.07348	1252
ENSSSA1UGT003904	6.72451	1.73536	6.72451	6.29067	3.90456	6.07375	3.68764	4.55531	5.63991	13.2321	2.1692	3.47072	3.68764	2.60304	7.80911	8.02603	3.68764	6.29067	0.650759	3.03688	461
ENSSSA1UGT003906	3.62438	2.9654	1.97694	2.63591	7.08402	1.97694	3.29489	5.76606	4.11862	11.5321	2.9654	4.61285	5.10708	4.61285	7.90774	12.0264	4.28336	10.0494	1.64745	1.81219	607
ENSSSA1UGT003910	7.84314	2.77778	1.63399	2.61438	4.41176	5.55556	1.79739	5.06536	3.26797	5.88235	0.980392	2.61438	7.02614	1.47059	12.0915	17.6471	10.4575	3.75817	1.79739	1.30719	612
ENSSSA1UGT003912	1.36986	1.36986	4.10959	5.47945	12.3288	6.84932	0	4.10959	5.47945	6.84932	1.36986	8.21918	8.21918	4.10959	5.47945	6.84932	2.73973	5.47945	1.36986	8.21918	73
ENSSSA1UGT003914	6.18153	2.34742	5.6338	6.65102	4.85133	4.69484	2.19092	5.32081	9.15493	9.9374	1.95618	4.92958	3.83412	3.28638	4.85133	7.98122	5.08607	6.65102	0.938967	3.52113	1278
ENSSSA1UGT003915	6.00858	3.00429	4.50644	6.86695	6.43777	5.15021	3.21888	6.65236	7.29614	9.22747	1.50215	6.43777	4.50644	3.21888	4.93562	6.86695	4.93562	6.65236	0.214592	2.36052	466
ENSSSA1UGT003923	3.21637	4.97076	2.92398	3.21637	3.21637	3.80117	0.584795	4.09357	4.67836	9.06433	2.63158	3.50877	7.01754	2.63158	9.64912	13.4503	12.5731	4.67836	2.33918	1.75439	342
ENSSSA1UGT003924	7.58874	1.34639	3.42717	5.01836	3.91677	5.01836	2.44798	7.83354	7.71114	9.05753	1.83599	7.71114	5.38556	3.91677	4.65116	5.87515	6.48715	6.60955	0.979192	3.18237	817
ENSSSA1UGT003926	2.6936	4.0404	5.72391	7.07071	5.72391	6.39731	2.3569	5.72391	6.73401	7.07071	1.0101	6.39731	4.0404	3.367	7.40741	7.40741	4.7138	5.72391	2.3569	4.0404	297
ENSSSA1UGT003930	4.33437	4.33437	4.64396	6.50155	6.19195	5.57276	4.33437	4.02477	6.81115	13.9319	1.54799	4.64396	7.12074	4.64396	4.33437	6.19195	3.71517	3.71517	0.928793	2.47678	323
ENSSSA1UGT003931	5.09383	2.14477	6.34495	5.80876	6.16622	3.75335	3.66399	6.07685	7.7748	9.38338	2.41287	6.25559	4.55764	2.68097	6.34495	5.54066	5.27256	5.63003	0.446828	4.64701	1119
ENSSSA1UGT003932	3.9924	7.41445	4.37262	2.85171	6.27376	3.04183	6.84411	2.47148	9.5057	7.22433	1.14068	6.08365	4.56274	4.56274	7.41445	11.9772	3.80228	4.75285	0.190114	1.52091	526
ENSSSA1UGT003934	6.21019	2.54777	1.11465	1.75159	3.18471	3.82166	2.07006	5.25478	7.00637	7.96178	2.2293	3.98089	6.36943	3.98089	10.9873	12.5796	10.5096	5.09554	1.43312	1.91083	628
ENSSSA1UGT003935	6.31313	1.76768	3.0303	7.57576	4.0404	6.81818	2.0202	8.83838	6.06061	8.83838	4.54545	3.78788	4.54545	4.79798	4.29293	4.79798	5.30303	10.6061	0.252525	1.76768	396
ENSSSA1UGT003936	5.03401	2.9932	2.9932	4.89796	7.34694	4.21769	2.85714	6.53061	7.61905	11.2925	2.85714	5.85034	5.03401	3.94558	5.03401	7.34694	2.72109	5.44218	1.63265	4.35374	735
ENSSSA1UGT003939	5.85242	2.29008	1.39949	2.67176	4.96183	4.58015	4.07125	4.19847	6.10687	7.63359	0.890585	3.68957	8.26972	3.81679	9.54198	14.1221	7.76081	5.08906	1.65394	1.39949	786
ENSSSA1UGT003944	6.52447	2.133	3.13676	6.27353	3.63864	6.64994	3.63864	4.64241	3.01129	9.53576	2.133	4.51694	6.52447	5.5207	9.41029	9.53576	5.26976	4.64241	0.878294	2.38394	797
ENSSSA1UGT003947	2.9703	3.9604	2.57426	6.73267	6.93069	5.54455	3.36634	4.75248	5.74257	9.70297	1.58416	4.15842	4.75248	4.35644	9.30693	9.90099	4.15842	4.35644	2.9703	2.17822	505
ENSSSA1UGT003948	3.76812	1.73913	5.21739	7.97101	5.07246	6.23188	2.89855	7.53623	6.37681	10.1449	1.44928	4.63768	5.07246	3.62319	4.05797	6.23188	6.23188	6.37681	1.5942	3.76812	690
ENSSSA1UGT003949	3.8835	3.23625	7.76699	6.47249	4.53074	7.76699	3.23625	4.20712	3.8835	10.356	1.94175	3.8835	4.20712	4.53074	6.47249	4.85437	5.82524	6.47249	1.61812	4.85437	309
ENSSSA1UGT003950	6.36704	2.62172	2.99625	4.30712	6.55431	6.17978	1.87266	7.49064	6.36704	10.4869	1.68539	5.43071	4.49438	2.80899	6.17978	8.2397	4.86891	7.1161	1.68539	2.24719	534
ENSSSA1UGT003951	6.18132	1.78571	6.18132	6.18132	5.08242	9.06593	2.60989	6.04396	3.15934	6.45604	1.23626	4.67033	7.14286	2.88462	6.73077	6.04396	5.21978	7.69231	2.06044	3.57143	728
ENSSSA1UGT003953	7.56646	0.613497	4.29448	5.11247	4.49898	5.52147	2.45399	7.36196	3.27198	11.4519	2.45399	2.65849	5.31697	2.24949	4.08998	9.20245	7.77096	7.77096	1.84049	4.49898	489
ENSSSA1UGT003955	5.74713	1.14943	2.29885	6.89655	5.74713	9.1954	2.29885	10.3448	10.3448	9.1954	2.29885	5.74713	0	4.5977	1.14943	5.74713	5.74713	4.5977	1.14943	5.74713	87
ENSSSA1UGT003956	0	2.38095	11.9048	2.38095	0	9.52381	4.7619	4.7619	7.14286	9.52381	2.38095	2.38095	4.7619	2.38095	2.38095	4.7619	4.7619	9.52381	2.38095	11.9048	42
ENSSSA1UGT003957	6.76856	2.18341	5.02183	8.95197	3.27511	4.14847	2.40175	7.20524	6.9869	6.55022	1.96507	4.80349	4.14847	3.27511	4.80349	8.95197	8.0786	6.9869	0.873362	2.62009	458
ENSSSA1UGT003958	5.4681	1.73985	5.6338	8.69925	4.1425	3.23115	2.56835	6.54515	7.1251	11.9304	1.73985	4.55675	6.21375	3.314	6.2966	5.9652	4.4739	6.37945	0.9942	2.9826	1207
ENSSSA1UGT003959	4.95283	2.83019	1.88679	2.83019	4.36321	5.89623	2.47642	6.48585	4.36321	9.43396	3.30189	3.77358	4.48113	5.07075	8.84434	10.3774	9.08019	4.36321	2.71226	2.47642	848
ENSSSA1UGT003963	4.38596	5.26316	5.26316	2.63158	2.63158	2.63158	0	4.38596	3.50877	9.64912	9.64912	3.50877	10.5263	3.50877	4.38596	15.7895	1.75439	4.38596	2.63158	3.50877	114
ENSSSA1UGT003964	4.66472	4.37318	4.37318	3.49854	8.16327	3.79009	2.62391	9.0379	7.87172	11.0787	3.207	3.79009	4.66472	3.79009	2.33236	6.99708	4.37318	6.99708	0.291545	4.08163	343
ENSSSA1UGT003965	0.662252	7.28477	5.73951	2.86976	6.18102	4.85651	7.50552	1.766	9.49227	8.38852	1.54525	4.41501	4.19426	2.20751	4.85651	11.0375	11.9205	2.86976	0	2.20751	453
ENSSSA1UGT003968	3.93082	3.77358	2.04403	4.24528	5.50314	3.93082	2.20126	6.28931	7.54717	11.1635	3.93082	3.77358	3.45912	4.55975	5.81761	11.6352	5.18868	6.44654	2.83019	1.72956	636
ENSSSA1UGT003969	5.35714	3.125	4.01786	5.20833	6.69643	6.25	2.23214	6.25	7.58929	11.0119	1.78571	4.91071	4.46429	4.01786	5.65476	6.99405	4.46429	4.6131	1.78571	3.57143	672
ENSSSA1UGT003971	5.95794	2.33645	2.80374	2.92056	3.85514	8.8785	3.38785	5.14019	6.65888	7.47664	1.63551	3.85514	5.14019	4.20561	14.9533	7.59346	5.25701	4.08879	1.86916	1.98598	856
ENSSSA1UGT003973	9.7561	1.87181	4.99149	4.70788	3.74362	4.481	3.23313	4.19739	4.87805	11.401	0.907544	2.94952	7.77085	4.08395	6.46625	6.97674	6.8633	6.74986	1.5882	2.3823	1763
ENSSSA1UGT003976	5.89812	3.21716	4.28954	7.7748	2.41287	6.43432	2.68097	5.63003	10.4558	8.84718	2.41287	7.5067	1.07239	3.21716	3.48525	9.91957	5.63003	6.43432	1.60858	1.07239	373
ENSSSA1UGT003977	4.79042	2.69461	1.64671	3.44311	4.04192	6.58683	2.24551	4.04192	4.04192	10.479	2.09581	1.49701	5.83832	5.68862	9.73054	14.0719	6.88623	5.23952	2.24551	2.69461	668
ENSSSA1UGT003980	5.66535	4.08432	1.71278	1.71278	5.5336	2.63505	2.50329	5.92885	5.13834	12.253	1.58103	3.42556	7.11462	4.21607	9.22266	10.1449	6.19236	6.98287	1.44928	2.50329	759
ENSSSA1UGT003985	9.05473	2.08955	4.97512	7.36318	3.58209	4.0796	1.49254	6.56716	4.87562	11.3433	2.98507	4.77612	3.78109	4.57711	4.0796	6.26866	6.46766	7.76119	0.995025	2.88557	1005
ENSSSA1UGT003992	6.60661	1.8018	4.5045	7.50751	3.6036	7.80781	2.1021	6.90691	7.20721	10.8108	0.600601	4.5045	3.9039	1.8018	4.2042	6.90691	6.00601	6.00601	1.5015	5.70571	333
ENSSSA1UGT003995	5.78512	4.54545	2.47934	4.54545	4.54545	3.71901	5.3719	6.61157	7.85124	9.50413	2.47934	6.19835	4.95868	4.13223	2.06612	10.3306	5.3719	4.54545	1.23967	3.71901	242
ENSSSA1UGT003996	3.2634	3.2634	5.12821	7.22611	6.29371	3.0303	1.8648	4.662	8.15851	12.3543	3.0303	7.22611	3.2634	4.4289	4.4289	7.69231	4.4289	5.82751	1.6317	2.7972	429
ENSSSA1UGT003997	5.48303	2.34987	7.8329	10.1828	3.91645	4.69974	1.04439	5.74413	7.5718	6.52742	1.04439	5.48303	5.74413	3.65535	6.78851	8.87728	4.17755	4.17755	1.56658	3.13316	383
ENSSSA1UGT003998	4.95495	3.15315	2.0592	2.89575	4.1184	2.9601	2.63835	5.98456	5.85586	10.6821	3.7323	4.8906	6.62806	4.7619	7.07851	9.26641	7.27156	7.91506	1.5444	1.60875	1554
ENSSSA1UGT004001	3.69004	4.05904	3.69004	4.05904	8.11808	2.58303	1.84502	8.48708	7.93358	11.6236	2.58303	6.08856	3.69004	2.21402	7.01107	9.40959	4.79705	4.05904	0.922509	3.13653	542
ENSSSA1UGT004004	4.43623	2.68022	1.75601	3.23475	7.02403	3.32717	3.51201	5.73013	4.52865	10.4436	1.2939	3.8817	6.74677	3.41959	9.51941	11.2754	5.82255	5.1756	1.94085	4.25139	1082
ENSSSA1UGT004006	3.27103	7.00935	3.73832	4.6729	6.07477	3.27103	6.54206	1.86916	8.8785	9.34579	0.934579	4.20561	4.6729	2.80374	9.81308	12.1495	4.20561	4.6729	0.46729	1.40187	214
ENSSSA1UGT004013	5.55556	3.1746	3.96825	11.1111	6.34921	9.52381	3.96825	3.1746	4.7619	7.93651	3.1746	5.55556	3.96825	0.793651	6.34921	6.34921	7.14286	1.5873	3.1746	2.38095	126
ENSSSA1UGT004015	6.25584	2.33427	5.78898	3.64146	3.64146	3.64146	2.05415	4.7619	6.53595	8.77684	1.30719	6.25584	7.6564	5.88235	2.70775	15.4995	6.81606	4.7619	0.466853	1.21382	1071
ENSSSA1UGT004022	8.69565	2.6087	5.21739	4.34783	2.6087	2.6087	4.34783	6.08696	11.3043	11.3043	1.73913	7.82609	6.08696	6.08696	1.73913	0	2.6087	8.69565	1.73913	4.34783	115
ENSSSA1UGT004023	4.60829	1.15207	5.52995	6.91244	3.45622	6.68203	2.76498	6.91244	9.447	6.2212	2.53456	4.60829	2.30415	5.52995	7.8341	6.2212	3.45622	8.29493	2.07373	3.45622	434
ENSSSA1UGT004024	6.05187	4.75504	5.18732	5.90778	5.6196	4.75504	2.16138	5.33141	7.06052	9.2219	1.29683	2.88184	4.17867	3.31412	5.90778	10.5187	6.05187	5.6196	1.00865	3.17003	694
ENSSSA1UGT004028	2.72727	11.8182	7.27273	4.54545	2.72727	10	1.81818	6.36364	10.9091	4.54545	0.909091	1.81818	4.54545	2.72727	7.27273	4.54545	2.72727	6.36364	0	6.36364	110
ENSSSA1UGT004030	4.62963	2.60943	4.0404	5.80808	2.94613	4.0404	3.7037	3.7037	7.15488	11.1953	2.94613	3.19865	4.0404	7.32323	8.33333	9.68013	5.47138	5.80808	1.6835	1.6835	1188
ENSSSA1UGT004033	5.53936	2.33236	2.91545	3.207	7.72595	4.08163	2.47813	6.55977	8.30904	8.89213	2.18659	4.51895	6.12245	5.24781	4.51895	9.62099	4.37318	6.85131	1.02041	3.49854	686
ENSSSA1UGT004034	4.61997	2.83159	3.42772	5.2161	5.51416	6.70641	3.72578	5.36513	8.04769	5.2161	1.19225	6.11028	3.42772	4.32191	8.79285	11.6244	4.91803	3.57675	1.34128	4.02385	671
ENSSSA1UGT004035	2.43902	7.31707	3.65854	2.92683	4.14634	4.14634	2.43902	4.39024	4.39024	6.09756	0.731707	9.02439	2.68293	4.39024	9.7561	13.6585	5.12195	5.60976	2.68293	4.39024	410
ENSSSA1UGT004036	2.68336	3.22004	2.32558	3.04114	7.51342	1.61002	3.39893	8.76565	7.51342	13.059	4.65116	5.36673	4.29338	5.00894	3.75671	8.76565	4.47227	6.26118	2.50447	1.78891	559
ENSSSA1UGT004037	5.1	3.5	3.5	4.6	6.4	5.6	3.7	4.4	5.1	9	0.6	4.6	6	4.4	10.5	9	3.8	5.2	1.8	3.2	1000
ENSSSA1UGT004038	3.93836	5.47945	1.88356	1.88356	7.70548	3.59589	4.45205	4.79452	4.62329	14.2123	1.5411	4.10959	5.82192	4.10959	4.62329	11.8151	5.82192	5.47945	1.19863	2.91096	584
ENSSSA1UGT004040	5.07463	0.298507	2.98507	8.65672	4.47761	5.97015	3.58209	6.56716	8.65672	9.55224	1.19403	5.37313	3.28358	3.58209	4.1791	8.0597	5.97015	6.86567	0.895522	4.77612	335
ENSSSA1UGT004041	6.87023	3.81679	4.19847	7.25191	6.10687	3.43511	6.10687	5.72519	4.96183	12.5954	0.763359	4.96183	2.29008	4.58015	3.05344	7.63359	5.72519	5.34351	1.14504	3.43511	262
ENSSSA1UGT004045	3.16456	6.96203	5.6962	4.43038	3.16456	5.06329	1.26582	6.32911	5.6962	10.7595	1.26582	3.16456	4.43038	1.26582	3.79747	10.7595	5.6962	8.86076	2.53165	5.6962	158
ENSSSA1UGT004046	6.20347	1.48883	5.95533	7.94045	8.43672	3.47395	2.23325	5.95533	7.94045	8.18859	1.98511	6.20347	4.96278	2.23325	3.97022	6.20347	5.21092	5.7072	1.24069	4.4665	403
ENSSSA1UGT004049	4.31965	3.7797	2.4838	3.45572	5.61555	5.07559	3.56371	4.9676	5.29158	9.93521	1.61987	3.23974	4.75162	4.21166	8.53132	11.0151	6.15551	5.93952	2.69978	3.34773	926
ENSSSA1UGT004050	5.50847	4.32203	3.81356	4.49153	3.72881	7.37288	4.91525	3.72881	2.54237	8.81356	1.35593	4.66102	5.08475	5.50847	9.83051	10.5932	5.42373	3.22034	2.37288	2.71186	1180
ENSSSA1UGT004057	5.15464	4.12371	3.09278	3.09278	7.21649	4.12371	2.06186	7.21649	7.21649	14.433	2.06186	4.12371	2.06186	3.09278	2.06186	12.3711	7.21649	6.18557	0	3.09278	97
ENSSSA1UGT004058	4.37158	2.18579	5.7377	7.9235	2.73224	7.9235	1.0929	4.37158	8.46995	10.6557	3.00546	1.91257	2.45902	4.91803	9.83607	3.82514	4.09836	8.19672	3.00546	3.27869	366
ENSSSA1UGT004059	3.48837	4.65116	0	3.48837	9.30233	6.97674	2.32558	5.81395	3.48837	9.30233	2.32558	4.65116	8.13953	0	5.81395	16.2791	4.65116	5.81395	1.16279	2.32558	86
ENSSSA1UGT004061	3.51648	3.07692	1.0989	3.95604	3.73626	4.3956	3.2967	7.03297	6.81319	11.4286	3.07692	3.95604	3.51648	6.37363	3.2967	11.6484	7.47253	5.49451	2.85714	3.95604	455
ENSSSA1UGT004063	5.18207	4.20168	3.64146	4.62185	4.62185	3.5014	3.36134	4.7619	8.12325	8.26331	1.54062	5.7423	5.46218	4.20168	8.12325	9.38375	6.58263	4.7619	0.560224	3.36134	714
ENSSSA1UGT004065	7.41797	2.28245	2.28245	3.99429	5.56348	7.27532	3.28103	5.42083	3.13837	11.127	2.56776	3.70899	4.99287	2.42511	6.70471	10.271	5.56348	6.70471	1.14123	4.13695	701
ENSSSA1UGT004067	4.11585	3.5061	2.7439	5.64024	6.09756	5.94512	4.57317	5.18293	7.16463	9.29878	0.914634	3.96341	3.65854	5.03049	9.90854	8.23171	4.72561	4.42073	1.67683	3.20122	656
ENSSSA1UGT004072	2.63158	0.877193	7.01754	5.26316	7.89474	5.26316	5.26316	2.63158	7.01754	10.5263	4.38596	5.26316	6.14035	3.50877	4.38596	7.89474	7.01754	2.63158	0.877193	3.50877	114
ENSSSA1UGT004073	7.33138	0.58651	4.98534	7.03812	4.98534	6.74487	3.51906	8.21114	9.09091	9.97067	1.75953	6.45161	3.81232	4.39883	2.93255	6.15836	4.39883	4.10557	0.58651	2.93255	341
ENSSSA1UGT004075	3.05132	3.8835	3.6061	3.46741	8.59917	3.05132	2.63523	7.90569	8.18308	12.7601	1.80305	5.27046	3.32871	3.46741	4.16089	8.73786	5.27046	5.54785	0.970874	4.29958	721
ENSSSA1UGT004076	6.03175	3.33333	3.80952	7.30159	5.2381	5.55556	2.38095	5.71429	7.30159	12.5397	1.5873	4.12698	3.33333	2.69841	4.28571	10.4762	4.60317	6.50794	1.26984	1.90476	630
ENSSSA1UGT004078	3.93258	4.77528	1.82584	4.35393	4.77528	4.35393	3.79213	5.19663	5.89888	5.47753	0.421348	4.63483	4.49438	3.79213	7.72472	16.573	7.86517	3.93258	2.66854	3.51124	712
ENSSSA1UGT004079	5.48246	2.41228	5.92105	8.11404	2.85088	7.45614	2.19298	6.14035	9.21053	8.33333	2.85088	2.19298	2.41228	5.04386	7.89474	3.50877	4.60526	7.01754	3.28947	3.07018	456
ENSSSA1UGT004080	4.65549	2.17256	3.53818	5.02793	6.14525	4.71757	3.72439	6.14525	6.2694	10.3662	2.91744	5.58659	3.84854	4.53135	5.09001	9.18684	5.27623	6.51769	1.05525	3.22781	1611
ENSSSA1UGT004082	10	3.57143	5.71429	2.85714	3.92857	3.92857	5	4.28571	4.28571	10	0.714286	4.64286	8.57143	2.14286	6.42857	8.57143	5.71429	6.42857	0.714286	2.5	280
ENSSSA1UGT004083	3.21199	1.2848	2.56959	2.99786	6.42398	2.78373	2.78373	8.13704	5.78158	13.2762	3.64026	5.99572	2.56959	4.71092	6.63812	6.85225	9.20771	5.13919	3.21199	2.78373	467
ENSSSA1UGT004084	3.92157	2.61438	2.83224	6.75381	4.3573	3.92157	2.83224	7.40741	5.22876	10.8932	2.17865	4.57516	1.74292	6.31808	6.31808	10.8932	6.53595	4.79303	1.30719	4.57516	459
ENSSSA1UGT004085	4.93976	3.49398	4.45783	4.57831	7.22892	5.06024	2.77108	7.95181	6.98795	11.5663	2.53012	4.81928	3.85542	2.6506	6.0241	7.46988	5.3012	4.45783	0.963855	2.89157	830
ENSSSA1UGT004086	3.13043	4.34783	2.95652	5.04348	9.04348	3.47826	3.13043	8.52174	10.2609	11.6522	1.21739	4.34783	2.95652	3.82609	4.17391	8.69565	3.47826	5.21739	0.521739	4	575
ENSSSA1UGT004090	4.25532	2.39362	3.05851	3.59043	5.85106	3.98936	2.92553	5.31915	7.31383	12.234	2.79255	4.3883	4.12234	4.65426	6.51596	9.17553	6.78191	4.65426	1.72872	4.25532	752
ENSSSA1UGT004091	5.41436	1.87845	3.8674	4.75138	6.07735	4.64088	3.20442	6.74033	6.85083	10.8287	2.09945	4.1989	4.41989	3.53591	5.63536	9.28177	4.0884	8.39779	0.994475	3.09392	905
ENSSSA1UGT004094	7.53564	1.222	4.88798	8.75764	4.07332	5.09165	1.83299	7.94297	9.16497	9.77597	3.05499	2.85132	4.27699	3.86965	4.27699	5.29532	4.68432	8.55397	0.407332	2.44399	491
ENSSSA1UGT004099	4.67626	1.43885	3.59712	8.99281	2.8777	5.39568	3.95683	8.27338	8.63309	12.9496	3.59712	3.59712	1.79856	5.03597	3.59712	8.27338	3.95683	4.31655	0.719424	4.31655	278
ENSSSA1UGT004100	6.78211	1.7316	3.4632	4.7619	6.78211	5.48341	3.4632	7.64791	5.77201	10.8225	2.5974	4.9062	6.34921	4.1847	5.62771	5.62771	4.7619	5.62771	1.0101	2.5974	693
ENSSSA1UGT004101	7.91296	2.07715	3.56083	4.74777	4.25321	6.52819	3.56083	5.14342	4.84669	8.50643	1.48368	3.85757	8.50643	4.1543	7.12166	10.4847	4.25321	5.14342	0.890208	2.96736	1011
ENSSSA1UGT004102	3.73444	5.67082	2.62794	4.84094	3.18119	4.97925	3.87275	4.97925	5.94744	9.82019	0.829876	5.80913	2.35131	5.67082	10.5118	10.5118	5.5325	4.14938	1.79806	3.18119	723
ENSSSA1UGT004107	4.34462	1.84094	8.83652	7.8056	6.2592	5.89102	1.03093	5.37555	6.48012	5.96465	1.54639	3.9028	7.14286	2.79823	11.7084	8.32106	3.82916	4.12371	1.10457	1.69367	1358
ENSSSA1UGT004109	3.35366	2.28659	3.04878	3.96341	3.35366	8.23171	4.11585	3.20122	3.20122	12.6524	0.609756	2.7439	6.85976	6.85976	13.5671	9.7561	3.65854	5.79268	1.52439	1.21951	656
ENSSSA1UGT004111	4.4483	1.1554	7.3368	7.68342	3.52397	6.93241	2.48411	3.81282	5.48816	7.04795	2.8885	5.25708	9.58983	5.14154	8.20335	9.0699	3.81282	4.15945	0.751011	1.21317	1731
ENSSSA1UGT004112	4.23453	2.28013	6.18893	6.51466	5.86319	6.18893	1.62866	5.21173	5.53746	8.14332	3.58306	4.88599	7.81759	3.90879	5.53746	4.88599	5.53746	7.49186	0.325733	4.23453	307
ENSSSA1UGT004113	4.70756	7.27532	4.13695	2.85307	8.70185	5.27817	4.70756	5.84879	2.56776	8.41655	0.998573	4.85021	2.1398	3.13837	9.55777	10.1284	4.2796	4.70756	1.71184	3.99429	701
ENSSSA1UGT004115	3.40285	3.40285	2.5247	2.96378	5.59824	3.29308	3.29308	5.48847	8.01317	14.1603	2.63447	5.26894	3.18332	3.84193	5.92755	11.416	5.70801	4.39078	1.86608	3.62239	911
ENSSSA1UGT004116	6.12245	2.04082	2.85714	7.34694	4.4898	4.08163	3.26531	4.89796	11.0204	8.16327	2.44898	6.93878	4.89796	1.22449	4.08163	7.34694	6.53061	6.93878	3.67347	1.63265	245
ENSSSA1UGT004120	5.42169	1.20482	5.42169	9.03614	7.22892	7.22892	4.81928	6.62651	7.83133	7.22892	2.40964	7.83133	4.81928	4.21687	2.40964	4.21687	4.81928	6.0241	0.60241	0.60241	166
ENSSSA1UGT004121	4.16667	3.2197	1.89394	2.08333	5.87121	2.65152	2.65152	7.38636	6.25	13.2576	2.65152	4.92424	6.43939	5.49242	4.54545	8.33333	6.06061	7.00758	1.70455	3.40909	528
ENSSSA1UGT004123	6.08974	2.88462	3.52564	3.84615	9.13462	7.05128	2.88462	5.76923	5.60897	8.8141	2.40385	3.84615	4.64744	3.20513	5.12821	7.37179	5.12821	8.01282	1.44231	3.20513	624
ENSSSA1UGT004128	6.2753	2.12551	3.84615	4.95951	6.37652	5.26316	1.92308	6.57895	8.2996	10.1215	3.13765	4.95951	5.36437	3.74494	3.64372	8.80567	5.36437	6.47773	0.506073	2.22672	988
ENSSSA1UGT004129	6.06061	2.6936	5.38721	2.6936	4.7138	6.39731	2.6936	3.7037	4.7138	10.101	1.6835	6.73401	4.0404	1.3468	4.3771	13.8047	5.72391	6.73401	3.0303	3.367	297
ENSSSA1UGT004135	2.56822	3.69181	2.08668	3.69181	4.33387	5.13644	5.13644	6.09952	6.09952	9.63082	0.481541	5.13644	3.04976	5.29695	14.2857	9.4703	4.33387	3.69181	2.24719	3.5313	623
ENSSSA1UGT004137	3.85675	3.58127	2.06612	2.20386	7.30028	3.85675	2.47934	7.7135	7.57576	10.8815	3.44353	4.40771	5.3719	3.16804	7.16253	9.64187	8.81543	3.16804	1.65289	1.65289	726
ENSSSA1UGT004138	4.97925	7.88382	2.48963	4.97925	4.97925	4.97925	3.73444	3.73444	6.639	8.29876	2.90456	3.73444	4.56432	2.90456	7.46888	7.88382	7.46888	5.39419	1.24481	3.73444	241
ENSSSA1UGT004139	3.79965	3.28152	2.76339	4.4905	5.18135	3.97237	5.69948	6.56304	5.00864	13.6442	3.10881	2.41796	5.00864	5.69948	9.32642	7.94473	4.14508	5.18135	0.863558	1.89983	579
ENSSSA1UGT004140	4.95283	1.65094	3.53774	8.25472	6.60377	4.71698	3.77358	7.07547	9.66981	8.72642	1.88679	2.83019	5.18868	3.30189	4.95283	9.19811	4.48113	4.95283	2.12264	2.12264	424
ENSSSA1UGT004141	6.58537	1.70732	6.21951	4.7561	4.14634	4.39024	2.07317	6.46341	6.21951	10.9756	1.58537	4.63415	5.12195	5.36585	5.2439	7.43902	4.5122	6.70732	1.70732	4.14634	820
ENSSSA1UGT004142	4.79042	2.39521	2.24551	3.29341	4.79042	5.23952	2.54491	7.48503	6.73653	11.2275	3.29341	3.89222	4.64072	4.94012	6.43713	9.28144	7.63473	5.38922	1.64671	2.09581	668
ENSSSA1UGT004143	4.45969	1.71527	4.97427	7.03259	2.5729	3.08748	2.22985	3.60206	12.3499	7.54717	1.20069	7.7187	4.28816	4.80274	7.37564	12.3499	5.8319	3.25901	0.686106	2.91595	583
ENSSSA1UGT004145	4.23077	3.46154	4.61538	7.69231	7.30769	5.38462	4.61538	3.07692	4.23077	5	2.30769	7.69231	2.69231	1.92308	10.7692	10.7692	3.07692	5.76923	0.769231	4.61538	260
ENSSSA1UGT004147	4.23729	2.11864	4.23729	2.75424	6.14407	3.60169	2.33051	9.11017	8.47458	10.8051	1.90678	4.44915	3.81356	3.17797	6.35593	9.5339	7.62712	3.17797	1.90678	4.23729	472
ENSSSA1UGT004151	4.83384	1.51057	4.68278	5.58912	5.13595	3.32326	1.96375	6.0423	7.25076	12.2356	1.96375	4.22961	5.28701	4.22961	4.68278	8.91239	5.43807	7.40181	1.51057	3.77644	662
ENSSSA1UGT004153	5.41667	3.61111	3.19444	4.93056	7.91667	5.06944	2.63889	5.48611	4.86111	10.8333	1.25	3.54167	5	4.79167	7.5	10.0694	4.02778	5.34722	1.18056	3.33333	1440
ENSSSA1UGT004155	5.09554	7.64331	0.318471	4.14013	7.00637	3.50318	10.1911	1.27389	7.32484	5.41401	1.27389	2.86624	4.14013	2.2293	6.36943	13.3758	11.465	5.41401	0.318471	0.636943	314
ENSSSA1UGT004156	5.29101	3.1746	1.0582	2.6455	4.7619	6.87831	2.91005	7.14286	4.49735	11.9048	1.5873	5.29101	4.49735	3.96825	10.0529	9.78836	4.49735	5.55556	2.6455	1.85185	378
ENSSSA1UGT004157	3.98551	4.34783	3.26087	2.89855	2.17391	2.89855	1.81159	5.7971	6.88406	11.9565	3.62319	2.53623	8.69565	5.43478	9.42029	9.78261	7.24638	2.53623	2.17391	2.53623	276
ENSSSA1UGT004158	2.20386	6.33609	2.20386	2.75482	4.6832	3.85675	5.50964	6.06061	4.40771	9.36639	0.275482	2.47934	3.85675	3.85675	9.64187	14.3251	5.78512	6.06061	3.58127	2.75482	363
ENSSSA1UGT004162	5.38244	3.68272	0.566572	2.54958	3.11615	5.94901	3.11615	3.39943	3.39943	7.93201	1.69972	2.54958	7.08215	2.54958	10.1983	18.6969	6.79887	5.66572	2.83286	2.83286	353
ENSSSA1UGT004164	5.01002	3.00601	3.80762	4.60922	3.00601	6.81363	5.61122	3.40681	4.20842	6.61323	0.801603	4.40882	5.21042	6.01202	15.8317	7.61523	6.01202	4.20842	1.60321	2.20441	499
ENSSSA1UGT004165	4.95781	4.00844	1.05485	1.68776	6.32911	5.06329	2.32068	3.05907	5.80169	8.33333	1.58228	2.53165	7.48945	2.42616	10.5485	16.2447	8.64979	4.53586	1.58228	1.79325	948
ENSSSA1UGT004167	3.06407	2.78552	5.57103	3.89972	5.84958	1.67131	2.78552	6.40669	4.45682	17.2702	1.11421	5.01393	4.73538	3.34262	5.01393	9.47075	6.68524	8.35655	1.11421	1.39276	359
ENSSSA1UGT004168	4.41176	4.41176	0	8.82353	2.94118	8.82353	1.47059	7.35294	5.88235	8.82353	2.94118	2.94118	8.82353	1.47059	5.88235	10.2941	2.94118	5.88235	4.41176	1.47059	68
ENSSSA1UGT004169	3.0504	2.78515	2.38727	2.25464	3.44828	1.45889	1.19363	7.55968	7.55968	16.1804	4.77454	5.17241	4.37666	5.57029	7.55968	8.22281	6.89655	5.03979	2.12202	2.38727	754
ENSSSA1UGT004174	5.09709	4.36893	2.30583	4.24757	7.40291	4.61165	4.00485	5.33981	3.51942	8.49515	1.33495	3.03398	7.88835	4.49029	7.03883	12.1359	3.64078	6.18932	0.849515	4.00485	824
ENSSSA1UGT004178	2.99479	3.25521	1.04167	1.69271	2.99479	4.55729	3.25521	6.38021	7.29167	15.1042	3.38542	5.07812	4.55729	8.46354	5.59896	9.50521	5.33854	5.72917	1.17188	2.60417	768
ENSSSA1UGT004181	6.29433	2.57092	2.03901	3.81206	4.69858	5.85106	2.03901	5.4078	4.07801	8.42199	1.95035	2.74823	8.33333	1.59574	7.80142	14.9823	8.33333	4.52128	2.03901	2.48227	1128
ENSSSA1UGT004182	5.06466	3.98707	2.15517	3.34052	6.57328	6.89655	4.4181	5.60345	5.49569	7.5431	2.04741	5.28017	5.38793	3.01724	10.0216	9.91379	5.17241	3.34052	2.04741	2.69397	928
ENSSSA1UGT004185	4.25894	3.74787	2.89608	6.30324	5.45145	3.40716	4.4293	4.77002	7.15503	7.49574	2.04429	4.59966	6.47359	4.4293	9.02896	8.00681	5.45145	5.11073	1.70358	3.2368	587
ENSSSA1UGT004189	2.7451	4.31373	1.96078	1.96078	5.88235	0.784314	3.92157	9.41176	9.41176	9.01961	2.35294	5.4902	3.92157	5.88235	7.05882	12.549	4.70588	3.92157	1.56863	3.13725	255
ENSSSA1UGT004193	6.69145	1.85874	3.71747	3.71747	3.34572	5.20446	3.34572	7.43494	9.29368	10.4089	2.60223	4.46097	1.48699	2.97398	4.46097	11.8959	6.69145	6.69145	0.371747	3.34572	269
ENSSSA1UGT004197	5.69395	3.29181	3.46975	3.73665	8.09609	3.02491	2.66904	5.87189	8.45196	11.5658	1.86833	5.07117	4.00356	3.73665	4.7153	8.45196	6.58363	5.33808	0.88968	3.46975	1124
ENSSSA1UGT004208	4.01146	1.14613	6.59026	9.16905	3.15186	3.4384	4.58453	6.59026	5.15759	12.6074	2.00573	6.30372	6.01719	5.73066	4.01146	5.73066	5.73066	4.87106	0.286533	2.86533	349
ENSSSA1UGT004213	7.12468	2.79898	4.70738	6.87023	3.43511	4.45293	2.54453	4.83461	7.88804	8.52417	3.18066	4.19847	5.72519	2.79898	6.87023	8.77863	4.58015	5.59796	1.78117	3.30789	786
ENSSSA1UGT004216	2.83019	1.88679	2.83019	3.77358	7.54717	9.43396	4.71698	15.0943	0	13.2075	0.943396	4.71698	0.943396	1.88679	2.83019	6.60377	3.77358	8.49057	0	8.49057	106
ENSSSA1UGT004222	4.2728	4.93016	5.09449	7.2309	5.66968	3.28677	5.66968	2.87592	7.97042	8.5456	1.80772	4.35497	5.66968	4.35497	5.83402	10.2712	5.58751	3.69762	0.328677	2.54725	1217
ENSSSA1UGT004224	7.02875	1.59744	5.11182	6.38978	4.15335	6.07029	2.55591	5.7508	8.94569	9.90415	2.23642	6.07029	3.83387	5.11182	3.19489	7.66773	4.47284	5.43131	0.638978	3.83387	313
ENSSSA1UGT004225	5.9582	4.62428	2.08982	4.89106	6.35838	2.80124	2.80124	5.78035	6.00267	7.73677	0.711427	3.86839	5.60249	4.35749	7.55892	12.8946	6.98088	4.09071	2.3566	2.53446	2249
ENSSSA1UGT004229	4.33862	3.59788	2.96296	3.80952	4.33862	5.60847	2.22222	5.60847	4.97354	8.46561	1.90476	4.12698	5.29101	4.7619	8.57143	10.0529	10.2646	3.91534	2.75132	2.43386	945
ENSSSA1UGT004232	5.61594	4.34783	4.71014	4.52899	4.34783	4.16667	1.44928	6.34058	5.97826	10.6884	2.17391	3.80435	8.87681	3.80435	7.97101	6.52174	5.43478	4.8913	1.26812	3.07971	552
ENSSSA1UGT004234	5.61056	1.32013	2.9703	5.61056	1.32013	4.62046	1.65017	2.9703	5.61056	9.24092	0.990099	6.27063	8.58086	7.59076	4.9505	15.8416	7.92079	5.94059	0	0.990099	303
ENSSSA1UGT004236	10.4478	0	1.49254	7.46269	2.98507	2.98507	2.98507	5.97015	7.46269	7.46269	2.98507	4.47761	1.49254	1.49254	7.46269	13.4328	10.4478	5.97015	0	2.98507	67
ENSSSA1UGT004237	5.6926	4.55408	6.07211	2.46679	0.379507	6.45161	0	3.79507	0.948767	4.17457	2.65655	9.67742	9.86717	2.8463	2.08729	17.0778	14.9905	5.6926	0	0.56926	527
ENSSSA1UGT004239	3.57143	5.95238	2.38095	11.9048	3.57143	5.95238	3.57143	2.38095	9.52381	3.57143	1.19048	2.38095	2.38095	3.57143	7.14286	20.2381	2.38095	4.7619	1.19048	2.38095	84
ENSSSA1UGT004240	3.65169	4.77528	3.93258	3.93258	6.17978	5.61798	2.80899	4.77528	7.58427	6.17978	0.561798	3.65169	3.65169	5.61798	12.9213	8.98876	5.05618	4.77528	2.24719	3.08989	356
ENSSSA1UGT004243	4.65983	1.77074	5.5918	8.01491	2.51631	8.2945	1.95713	6.33737	8.94688	7.73532	2.23672	3.82106	2.8891	4.84623	8.01491	5.40541	4.00746	7.54893	2.51631	2.8891	1073
ENSSSA1UGT004246	6.09756	3.65854	5.79268	8.84146	3.04878	5.18293	2.43902	6.70732	6.40244	10.6707	0.914634	3.96341	2.13415	3.96341	5.18293	7.31707	4.57317	10.6707	0.609756	1.82927	328
ENSSSA1UGT004250	6.19946	3.50404	1.61725	1.88679	7.27763	2.69542	2.42588	6.73854	7.54717	8.3558	1.88679	3.50404	5.39084	3.2345	7.54717	12.938	7.81671	5.12129	2.15633	2.15633	371
ENSSSA1UGT004251	4.93028	6.3247	2.53984	3.68526	5.12948	4.73108	3.33665	5.77689	5.77689	8.11753	0.846614	4.33267	4.13347	4.63147	10.4582	12.1514	4.63147	4.13347	1.84263	2.49004	2008
ENSSSA1UGT004252	6.73077	6.08974	3.20513	6.41026	3.20513	3.52564	4.48718	5.12821	9.29487	5.44872	0.961538	4.80769	1.60256	3.84615	13.7821	8.65385	5.44872	2.88462	1.60256	2.88462	312
ENSSSA1UGT004259	9.7561	3.83275	2.78746	4.18118	6.62021	8.36237	2.78746	5.57491	3.13589	8.01394	2.78746	3.83275	4.18118	3.13589	3.83275	10.453	3.48432	6.96864	1.39373	4.87805	287
ENSSSA1UGT004264	6.16622	3.21716	4.55764	5.89812	2.94906	5.36193	1.60858	8.0429	10.7239	5.89812	1.07239	6.43432	6.70241	4.28954	5.36193	8.84718	3.75335	6.70241	0.268097	2.14477	373
ENSSSA1UGT004265	4.0404	7.07071	4.0404	5.05051	6.06061	5.05051	6.06061	2.0202	9.09091	7.07071	1.0101	0	4.0404	3.0303	9.09091	10.101	9.09091	3.0303	1.0101	4.0404	99
ENSSSA1UGT004266	3.94737	3.94737	3.36257	4.23977	2.92398	4.38596	2.04678	5.99415	8.91813	8.62573	3.80117	4.09357	4.67836	3.94737	9.79532	10.9649	6.28655	3.94737	1.90058	2.19298	684
ENSSSA1UGT004272	6.65914	2.59594	4.96614	6.32054	4.85327	8.01354	1.24153	5.75621	5.19187	9.25508	2.82167	4.62754	6.43341	2.7088	3.61174	9.81941	4.17607	7.22348	0.564334	3.16027	886
ENSSSA1UGT004273	3.78657	3.95869	2.75387	3.78657	4.04475	4.38898	3.09811	5.42169	7.31497	10.241	2.0654	4.81928	5.93804	3.95869	7.65921	9.89673	6.88468	4.99139	2.15146	2.83993	1162
ENSSSA1UGT004274	5.06781	2.42684	4.92505	6.35261	5.71021	3.85439	3.42612	6.995	7.56602	10.4211	2.92648	4.21128	4.35403	3.14061	4.92505	6.85225	4.85368	6.49536	2.21271	3.28337	1401
ENSSSA1UGT004275	3.68852	5.32787	2.3224	2.73224	4.78142	5.60109	4.09836	5.05464	4.78142	8.87978	1.0929	4.23497	3.68852	3.96175	10.929	12.0219	5.60109	4.78142	3.82514	2.59563	732
ENSSSA1UGT004281	5.74018	4.83384	5.13595	2.71903	4.83384	5.43807	2.71903	3.92749	3.02115	8.45921	0.60423	3.62538	12.3867	3.62538	12.9909	8.45921	2.41692	5.74018	2.1148	1.20846	331
ENSSSA1UGT004282	2.91971	5.83942	2.6764	3.40633	6.32603	5.10949	3.89294	5.83942	5.3528	7.29927	0.973236	5.83942	3.89294	3.40633	9.24574	11.6788	5.59611	3.89294	2.6764	4.13625	411
ENSSSA1UGT004285	4	2.85714	8	8	5.14286	6.85714	1.14286	5.14286	5.14286	11.4286	2.85714	4.57143	4	4	5.14286	5.71429	5.71429	5.71429	0.571429	4	175
ENSSSA1UGT004286	2.33236	3.49854	1.45773	3.06122	4.08163	4.51895	3.79009	7.87172	6.85131	13.7026	3.64431	4.66472	3.64431	3.207	6.99708	9.18367	6.41399	6.12245	2.76968	2.18659	686
ENSSSA1UGT004287	8.4127	3.01587	4.28571	5.2381	6.8254	6.98413	2.69841	6.66667	4.7619	8.57143	1.26984	3.33333	4.44444	3.1746	4.12698	9.84127	4.44444	7.77778	0.634921	3.49206	630
ENSSSA1UGT004290	4.47619	2.09524	4.57143	5.90476	6.38095	3.61905	3.14286	5.90476	6	12.4762	1.52381	4.47619	4.19048	4.66667	4.38095	10.6667	5.80952	5.61905	0.666667	3.42857	1050
ENSSSA1UGT004292	3.17797	2.54237	1.48305	2.9661	6.35593	3.17797	2.9661	8.47458	11.4407	14.4068	5.50847	4.44915	1.69492	5.9322	5.9322	5.50847	4.87288	4.87288	1.48305	2.75424	472
ENSSSA1UGT004293	6.17849	2.89855	1.67811	3.89016	3.89016	4.88177	1.67811	5.41571	7.1701	6.55988	3.20366	4.88177	5.33944	2.44088	10.2975	11.7468	8.69565	3.96644	3.27994	1.90694	1311
ENSSSA1UGT004297	4.01167	2.18818	5.03282	7.43982	5.9081	5.39752	2.33406	4.74106	8.97155	9.77389	2.33406	4.52225	3.93873	3.06346	5.25164	10.1386	4.37637	6.05398	1.02115	3.50109	1371
ENSSSA1UGT004300	5.5788	2.23152	1.53417	4.46304	2.09205	4.74198	2.7894	6.41562	4.1841	10.8787	2.7894	3.06834	5.99721	3.34728	7.81032	11.855	12.6918	4.60251	2.09205	0.83682	717
ENSSSA1UGT004301	4	2.66667	8	8	6.66667	5.33333	1.33333	5.33333	10.6667	10.6667	2.66667	6.66667	2.66667	0	2.66667	8	2.66667	9.33333	1.33333	1.33333	75
ENSSSA1UGT004303	3.42205	4.30925	2.28137	3.29531	6.08365	5.83016	3.16857	4.68948	6.71736	9.88593	1.39417	5.06971	3.5488	5.83016	9.63245	9.75919	4.56274	3.67554	3.42205	3.42205	789
ENSSSA1UGT004305	5.18135	2.59067	2.33161	4.40415	4.92228	4.92228	2.33161	4.66321	3.62694	11.1399	2.33161	5.44041	4.14508	4.92228	8.29016	10.8808	6.47668	6.73575	2.33161	2.33161	386
ENSSSA1UGT004307	5.54017	2.49307	4.43213	4.43213	2.77008	4.70914	3.04709	6.92521	7.20222	6.37119	2.21607	6.6482	3.87812	4.70914	4.70914	8.31025	6.6482	9.69529	1.38504	3.87812	361
ENSSSA1UGT004308	4.08163	2.04082	4.7619	5.61224	4.08163	3.57143	3.23129	7.65306	7.14286	11.2245	1.02041	6.12245	5.78231	4.08163	3.7415	8.33333	5.44218	7.48299	1.87075	2.72109	588
ENSSSA1UGT004309	6.76329	3.86473	3.38164	3.38164	5.31401	8.69565	3.86473	4.83092	3.38164	7.72947	0	3.38164	8.21256	4.34783	13.0435	8.21256	5.7971	4.83092	0	0.966184	207
ENSSSA1UGT004310	3.57143	3.37302	2.18254	2.38095	5.15873	2.77778	3.76984	3.96825	2.57937	17.4603	3.37302	2.77778	6.74603	5.55556	4.16667	12.1032	4.96032	7.93651	1.78571	3.37302	504
ENSSSA1UGT004311	7	2	3	4	11	1	0	12	8	12	4	5	2	1	9	8	6	1	1	3	100
ENSSSA1UGT004313	6.27178	1.74216	5.92334	6.79443	3.13589	5.92334	2.96167	4.52962	5.4007	11.4983	3.13589	4.18118	3.48432	3.65854	7.14286	7.49129	6.27178	7.66551	0.696864	2.09059	574
ENSSSA1UGT004321	3.0303	13.1313	2.0202	5.05051	2.0202	6.06061	5.05051	8.08081	9.09091	7.07071	4.0404	0	6.06061	0	6.06061	6.06061	9.09091	5.05051	1.0101	2.0202	99
ENSSSA1UGT004326	3.78788	2.65152	4.16667	4.54545	6.43939	4.92424	2.27273	6.81818	9.09091	8.33333	2.65152	5.68182	4.54545	4.16667	6.81818	8.33333	3.78788	5.30303	1.13636	4.54545	264
ENSSSA1UGT004328	10.2138	1.66271	3.56295	4.15677	3.56295	4.75059	4.3943	2.61283	2.96912	8.90736	0.950119	1.66271	10.9264	6.17577	10.3325	9.50119	4.98812	7.00713	0.593824	1.06888	842
ENSSSA1UGT004329	5.60748	0	3.73832	8.41121	0.934579	5.60748	4.6729	12.1495	14.0187	5.60748	0.934579	3.73832	4.6729	0.934579	5.60748	10.2804	2.80374	6.54206	0	3.73832	107
ENSSSA1UGT004330	6.2954	2.05811	5.9322	5.69007	6.53753	4.60048	2.42131	5.44794	5.56901	8.35351	2.90557	5.20581	5.08475	3.87409	4.60048	8.83777	5.32688	6.05327	1.08959	4.11622	826
ENSSSA1UGT004331	5.65111	2.33415	5.15971	6.87961	4.6683	4.05405	1.84275	6.63391	6.01966	10.4423	2.2113	3.31695	4.05405	4.05405	6.63391	6.38821	5.65111	8.10811	0.859951	5.03686	814
ENSSSA1UGT004337	8.44444	2.88889	3.11111	4.44444	1.55556	12.4444	5.11111	1.11111	0.444444	10.6667	0.444444	1.11111	15.3333	3.77778	16.6667	4.22222	3.11111	3.11111	1.11111	0.888889	450
ENSSSA1UGT004338	4.7081	2.82486	2.44821	2.63653	4.51977	1.88324	3.20151	6.59134	9.60452	10.3578	2.63653	4.14313	4.7081	5.46139	7.53296	8.47458	8.09793	6.21469	1.50659	2.44821	531
ENSSSA1UGT004339	4.08654	5.04808	2.16346	2.16346	10.5769	3.60577	2.64423	7.69231	6.73077	12.0192	1.68269	4.32692	4.80769	4.80769	3.60577	10.0962	3.60577	4.56731	2.16346	3.60577	416
ENSSSA1UGT004340	3.93013	3.05677	2.07424	3.49345	3.49345	3.38428	1.63755	7.53275	6.65939	9.17031	2.18341	3.82096	5.8952	4.36681	10.8079	10.0437	7.20524	5.131	2.18341	3.93013	916
ENSSSA1UGT004349	3.43681	2.43902	1.10865	3.7694	4.102	3.54767	2.21729	6.20843	9.64523	9.31264	4.98891	5.09978	4.98891	5.43237	7.09534	9.53437	5.9867	6.54102	2.32816	2.21729	902
[truncated: 10,619 more rows]

## Sheet: Amino acid abundance 
All frequencies are given in percent.
Domain: Data
	Transcript abundance	Ala	Ala abundance	Cys	Cys abundance	Asp	Asp abundance	Glu	Glu abundance	Phe	Phe abundance	Gly	Gly abundance	His	His abundance	Ile	ile abundance	Lys	Lys abundance	Leu	Leu abundance	Met	Met	Asn	Asn abundance	Pro	Pro abundance	Gln	Gln abundance	Arg	Arg abundance	Ser	Ser abundance	Thr	Thr abundance	Val	Val abundance	Trp	Trp abundance	Tyr	Tyr abundance	Total
ENSSSA1UGT000009	4.82867	5	24.1434	0.357143	1.72453	4.64286	22.4188	3.92857	18.9698	5.35714	25.8679	7.85714	37.9396	4.64286	22.4188	7.85714	37.9396	7.5	36.2151	9.64286	46.5622	1.78571	43.1132	3.21429	15.5207	2.85714	13.7962	5.35714	25.8679	3.92857	18.9698	7.14286	34.4905	5.71429	27.5924	7.5	36.2151	1.42857	6.89811	4.28571	20.6943	280
ENSSSA1UGT000010	5.16335	2.94118	15.1863	3.52941	18.2236	2.94118	15.1863	5.88235	30.3727	2.94118	15.1863	7.05882	36.4472	4.11765	21.2609	8.23529	42.5217	4.70588	24.2981	5.88235	30.3727	0	0	2.94118	15.1863	7.05882	36.4472	7.64706	39.4845	13.5294	69.8571	10.5882	54.6708	2.94118	15.1863	2.94118	15.1863	2.35294	12.1491	1.76471	9.1118	170
ENSSSA1UGT000014	3.79263	7.53111	28.5627	2.35756	8.94138	3.53635	13.4121	4.3222	16.3925	4.25671	16.1442	5.04257	19.1246	3.07793	11.6735	4.45318	16.8893	3.99476	15.1507	9.75769	37.0074	2.42305	69.209	4.78062	18.1311	7.40013	28.066	5.10806	19.373	5.17354	19.6214	8.90635	33.7785	6.02489	22.8502	8.84086	33.5302	0.654879	2.48372	2.35756	8.94138	1527
ENSSSA1UGT000017	1.78843	6.42857	11.497	8.57143	15.3294	2.85714	5.10979	2.14286	3.83234	5.71429	10.2196	2.85714	5.10979	6.42857	11.497	2.14286	3.83234	12.8571	22.9941	5.71429	10.2196	3.57143	41.0608	3.57143	6.38724	4.28571	7.66469	5.71429	10.2196	6.42857	11.497	13.5714	24.2715	1.42857	2.5549	5	8.94214	0	0	0.714286	1.27745	140
ENSSSA1UGT000018	2.18074	4.45434	9.71375	2.33853	5.09972	2.11581	4.61403	4.5657	9.95659	4.12027	8.98522	3.2294	7.04247	4.12027	8.98522	6.4588	14.0849	6.01336	13.1136	8.35189	18.2133	2.89532	28.1244	5.45657	11.8993	5.45657	11.8993	4.34298	9.47091	10.245	22.3416	9.79955	21.3702	6.90423	15.0563	5.79065	12.6279	1.11359	2.42844	2.22717	4.85687	898
ENSSSA1UGT000021	2.63911	4.68384	12.3612	6.32319	16.6876	2.26386	5.97457	7.33802	19.3658	5.46448	14.4214	3.66901	9.68292	8.35285	22.0441	2.88837	7.62273	6.79157	17.9237	4.7619	12.5672	2.10773	26.054	3.35675	8.85885	4.52771	11.9491	3.35675	8.85885	4.7619	12.5672	14.676	38.7317	10.6948	28.2247	2.8103	7.41671	0.312256	0.824079	0.858704	2.26622	1281
ENSSSA1UGT000023	2.49327	4.89396	12.202	2.93638	7.32117	1.79445	4.47405	5.22023	13.0154	5.22023	13.0154	3.42577	8.54137	5.87276	14.6423	4.73083	11.7952	3.75204	9.35483	11.4192	28.4712	2.28385	27.8674	4.24144	10.575	4.0783	10.1683	5.70962	14.2356	8.80914	21.9635	8.80914	21.9635	7.17781	17.8962	4.40457	10.9818	2.12072	5.28751	3.09951	7.7279	613
ENSSSA1UGT000024	2.66381	4.56334	12.1559	4.24862	11.3175	2.04563	5.44918	4.64201	12.3654	6.29426	16.7667	3.93391	10.4792	4.48466	11.9463	5.66483	15.09	4.87805	12.9942	11.9591	31.8567	2.12431	25.8228	4.01259	10.6888	2.36035	6.28751	5.97954	15.9284	5.03541	13.4134	10.8576	28.9226	6.68765	17.8146	4.24862	11.3175	1.96696	5.23959	4.01259	10.6888	1271
ENSSSA1UGT000025	2.27802	7.26496	16.5497	2.62515	5.98014	1.5873	3.6159	3.663	8.34439	5.06716	11.5431	2.1978	5.00663	4.45665	10.1523	7.44811	16.9669	5.18926	11.8212	11.4774	26.1457	1.64835	27.2797	5.43346	12.3775	4.1514	9.45697	3.60195	8.20531	9.34066	21.2782	7.93651	18.0795	5.98291	13.6292	7.50916	17.106	0.732601	1.66888	2.6862	6.11922	1638
ENSSSA1UGT000026	1.02335	8.21429	8.40611	2.14286	2.1929	5.71429	5.84773	2.85714	2.92386	5.71429	5.84773	7.14286	7.30966	1.42857	1.46193	3.57143	3.65483	1.78571	1.82741	11.7857	12.0609	0.714286	6.00436	5.35714	5.48224	7.5	7.67514	4.64286	4.75128	4.28571	4.3858	8.21429	8.40611	5.71429	5.84773	8.57143	8.77159	1.07143	1.09645	3.57143	3.65483	280
ENSSSA1UGT000028	1.1154	5.25773	5.86449	2.57732	2.87475	5.36082	5.97948	3.19588	3.56469	7.62887	8.50927	6.08247	6.78441	1.4433	1.60986	6.70103	7.47435	4.3299	4.82958	11.0309	12.3039	1.4433	8.46422	5.56701	6.20946	5.56701	6.20946	3.09278	3.4497	5.97938	6.66942	7.1134	7.93431	5.7732	6.43944	6.80412	7.58934	0.721649	0.804931	4.3299	4.82958	970
ENSSSA1UGT000036	4.81313	3.28152	15.7944	4.4905	21.6134	2.41796	11.638	3.79965	18.2882	7.25389	34.9139	3.79965	18.2882	3.28152	15.7944	7.59931	36.5765	3.97237	19.1195	13.4715	64.8401	0.863558	13.6394	3.79965	18.2882	6.73575	32.4201	3.97237	19.1195	11.0535	53.2021	6.56304	31.5888	4.31779	20.7821	4.83592	23.2759	0.690846	3.32513	3.79965	18.2882	579
ENSSSA1UGT000039	15.4299	11.4754	177.065	0	0	3.27869	50.59	4.91803	75.8849	0	0	6.55738	101.18	1.63934	25.295	8.19672	126.475	11.4754	177.065	16.3934	252.95	0	0	8.19672	126.475	4.91803	75.8849	4.91803	75.8849	6.55738	101.18	1.63934	25.295	4.91803	75.8849	4.91803	75.8849	0	0	0	0	61
ENSSSA1UGT000040	4.56844	5.69948	26.0377	1.29534	5.91767	5.18135	23.6707	9.32642	42.6072	4.40415	20.1201	6.21762	28.4048	2.33161	10.6518	2.33161	10.6518	7.77202	35.506	9.84456	44.9743	3.88601	101.183	5.44041	24.8542	5.69948	26.0377	5.95855	27.2213	3.62694	16.5695	6.47668	29.5883	5.44041	24.8542	5.44041	24.8542	0.518135	2.36707	3.10881	14.2024	386
ENSSSA1UGT000042	4.3743	7.78443	34.0514	2.69461	11.787	8.08383	35.3611	4.49102	19.6451	6.28743	27.5031	5.68862	24.8838	3.29341	14.4064	5.98802	26.1934	7.18563	31.4321	6.88623	30.1224	1.1976	40.7802	4.49102	19.6451	2.69461	11.787	3.29341	14.4064	3.59281	15.7161	6.28743	27.5031	6.58683	28.8128	8.38323	36.6708	2.39521	10.4774	2.69461	11.787	334
ENSSSA1UGT000046	5.11421	4.94062	25.2674	1.90024	9.71822	5.08314	25.9962	4.7981	24.5385	4.98812	25.5103	5.17815	26.4822	2.66033	13.6055	6.4133	32.799	4.94062	25.2674	9.83373	50.2918	1.52019	38.4112	6.31829	32.3131	5.65321	28.9117	2.80285	14.3344	4.08551	20.8942	10.7838	55.1509	5.6057	28.6688	6.74584	34.4997	2.18527	11.176	3.56295	18.2217	2105
ENSSSA1UGT000052	6.97061	6.63265	46.2336	2.55102	17.7822	5.10204	35.5643	6.63265	46.2336	5.10204	35.5643	3.57143	24.895	1.02041	7.11287	5.10204	35.5643	11.2245	78.2415	12.7551	88.9108	1.53061	70.7657	5.10204	35.5643	4.59184	32.0079	5.10204	35.5643	2.04082	14.2257	4.59184	32.0079	9.69388	67.5722	4.08163	28.4515	0	0	3.57143	24.895	196
ENSSSA1UGT000053	3.7131	6.72854	24.9838	1.39211	5.16906	3.24826	12.0611	5.91647	21.9685	5.22042	19.384	3.94432	14.6457	2.66821	9.90736	2.43619	9.04585	5.68445	21.107	11.7169	43.5062	1.62413	40.5769	5.80046	21.5377	9.28074	34.4604	7.19258	26.7068	3.48028	12.9226	9.28074	34.4604	4.9884	18.5224	5.10441	18.9532	1.50812	5.59981	2.78422	10.3381	862
ENSSSA1UGT000054	2.73353	6.61896	18.0931	1.61002	4.40103	3.22004	8.80206	6.08229	16.6261	6.08229	16.6261	4.47227	12.2251	3.57782	9.78006	4.83005	13.2031	3.39893	9.29106	10.7335	29.3402	1.43113	25.8935	4.11449	11.2471	3.9356	10.7581	4.83005	13.2031	8.05009	22.0051	8.58676	23.4721	6.08229	16.6261	7.69231	21.0271	1.25224	3.42302	3.39893	9.29106	559
ENSSSA1UGT000065	9.19646	5.91716	54.4169	0.591716	5.44169	9.46746	87.0671	11.8343	108.834	6.50888	59.8586	6.50888	59.8586	0.591716	5.44169	7.10059	65.3003	5.91716	54.4169	6.50888	59.8586	5.91716	321.994	5.32544	48.9752	2.36686	21.7668	2.36686	21.7668	4.14201	38.0919	4.14201	38.0919	7.10059	65.3003	4.73373	43.5335	0	0	2.95858	27.2085	169
ENSSSA1UGT000067	5.49283	3.76344	20.6719	0.537634	2.95314	11.2903	62.0158	5.37634	29.5314	2.15054	11.8125	6.98925	38.3908	3.22581	17.7188	5.37634	29.5314	5.91398	32.4845	12.9032	70.8753	2.15054	44.4558	4.30108	23.6251	3.22581	17.7188	4.30108	23.6251	4.83871	26.5782	10.2151	56.1096	4.83871	26.5782	5.91398	32.4845	0.537634	2.95314	2.15054	11.8125	186
ENSSSA1UGT000068	4.48783	5.43971	24.4125	5.53037	24.8193	1.54125	6.91687	5.89302	26.4468	3.35449	15.0544	6.25567	28.0743	2.71985	12.2062	3.98912	17.9025	8.70354	39.06	5.25839	23.5987	0.453309	11.0664	5.16772	23.1919	2.99184	13.4269	5.07706	22.785	10.9701	49.2318	13.0553	58.5899	7.43427	33.3637	2.44787	10.9856	1.08794	4.8825	2.62919	11.7994	1103
ENSSSA1UGT000069	3.40448	5.27132	17.9461	3.41085	11.6122	4.96124	16.8904	4.03101	13.7235	3.72093	12.6678	5.27132	17.9461	2.0155	6.86174	6.04651	20.5852	8.21705	27.9748	10.2326	34.8365	3.25581	58.4291	4.34109	14.7791	3.87597	13.1957	4.18605	14.2513	4.8062	16.3626	10.8527	36.9478	6.20155	21.113	7.5969	25.8635	0.465116	1.58348	1.24031	4.22261	645
ENSSSA1UGT000071	7.19009	8.07453	58.0566	0.621118	4.4659	4.96894	35.7272	10.559	75.9202	6.21118	44.659	4.96894	35.7272	2.48447	17.8636	6.21118	44.659	7.45342	53.5907	8.07453	58.0566	1.86335	108.18	4.96894	35.7272	3.10559	22.3295	1.24224	8.93179	2.48447	17.8636	9.93789	71.4543	3.10559	22.3295	9.93789	71.4543	1.24224	8.93179	2.48447	17.8636	161
ENSSSA1UGT000072	4.14479	3.38733	14.0398	2.79823	11.5981	6.03829	25.0274	4.56554	18.9232	7.06922	29.3004	3.68189	15.2606	3.53461	14.6502	7.06922	29.3004	7.36377	30.5213	9.86745	40.8985	2.50368	35.1511	6.48012	26.8587	3.68189	15.2606	3.68189	15.2606	4.71281	19.5336	7.8056	32.3525	2.94551	12.2085	6.48012	26.8587	1.7673	7.3251	4.56554	18.9232	679
ENSSSA1UGT000073	3.72018	3.45125	12.8393	3.19241	11.8763	2.761	10.2714	7.42019	27.6044	4.65919	17.333	5.0906	18.9379	1.55306	5.77767	6.55738	24.3946	10.2675	38.1968	8.71441	32.4192	1.20794	15.509	5.43572	20.2219	3.19241	11.8763	5.43572	20.2219	10.0949	37.5549	7.59275	28.2464	4.74547	17.654	4.22778	15.7281	1.12166	4.17276	3.27869	12.1973	1159
ENSSSA1UGT000074	1.48435	8.76351	13.0082	2.64106	3.92027	3.36134	4.98943	5.16206	7.66234	4.68187	6.94956	6.0024	8.90969	3.60144	5.34582	3.0012	4.45485	4.92197	7.30595	14.2857	21.2051	2.16086	28.1089	3.36134	4.98943	4.32173	6.41498	2.88115	4.27665	8.04322	11.939	8.04322	11.939	4.56182	6.77137	5.7623	8.55331	0.840336	1.24736	3.60144	5.34582	833
ENSSSA1UGT000075	3.02654	8.70787	26.3547	1.40449	4.25075	3.93258	11.9021	4.77528	14.4526	3.37079	10.2018	6.74157	20.4036	1.1236	3.4006	4.77528	14.4526	8.98876	27.2048	10.3933	31.4556	0.842697	22.209	7.86517	23.8042	2.52809	7.65136	5.05618	15.3027	5.89888	17.8532	8.42697	25.5045	7.58427	22.9541	2.52809	7.65136	0.280899	0.850151	4.77528	14.4526	356
ENSSSA1UGT000076	1.44259	8.16832	11.7835	2.72277	3.92783	3.21782	4.64199	3.46535	4.99906	1.73267	2.49953	4.70297	6.78444	5.44554	7.85567	2.47525	3.57076	4.70297	6.78444	12.8713	18.5679	0.247525	2.91671	1.23762	1.78538	10.6436	15.3543	6.43564	9.28397	13.1188	18.925	5.44554	7.85567	5.19802	7.49859	3.9604	5.71321	2.72277	3.92783	1.48515	2.14246	404
ENSSSA1UGT000077	1.48484	4.85714	7.21209	1.42857	2.1212	6.28571	9.33329	8.57143	12.7272	6.57143	9.75754	4.57143	6.78785	2.85714	4.24241	5.71429	8.48481	4.57143	6.78785	8.85714	13.1515	1.71429	12.3636	4.28571	6.36361	6.57143	9.75754	5.14286	7.63633	8	11.8787	5.42857	8.06057	4.28571	6.36361	6.28571	9.33329	1.71429	2.54544	2.28571	3.39393	350
ENSSSA1UGT000078	3.8864	4.90677	19.0697	2.55152	9.91624	4.21982	16.3999	3.82728	14.8744	7.45829	28.9859	4.90677	19.0697	2.45339	9.53484	5.10304	19.8325	6.47694	25.172	11.9725	46.53	2.45339	46.7853	6.18253	24.0278	3.63101	14.1116	3.53288	13.7302	3.53288	13.7302	10.6968	41.5719	4.7105	18.3069	6.18253	24.0278	1.07949	4.19533	4.12169	16.0185	1019
ENSSSA1UGT000081	5.4798	3.3046	18.1085	4.31034	23.6198	3.16092	17.3212	4.31034	23.6198	7.75862	42.5157	3.44828	18.8959	2.58621	14.1719	6.75287	37.0044	8.18966	44.8777	11.6379	63.7736	2.87356	52.0361	5.74713	31.4931	4.31034	23.6198	3.73563	20.4705	4.74138	25.9818	6.75287	37.0044	4.88506	26.7692	5.17241	28.3438	1.58046	8.66061	4.74138	25.9818	696
ENSSSA1UGT000082	9.62118	12.9032	124.144	2.15054	20.6907	4.30108	41.3814	2.15054	20.6907	4.30108	41.3814	4.30108	41.3814	2.15054	20.6907	4.30108	41.3814	4.30108	41.3814	9.67742	93.1082	3.22581	400.465	2.15054	20.6907	6.45161	62.0721	3.22581	31.0361	3.22581	31.0361	12.9032	124.144	9.67742	93.1082	4.30108	41.3814	1.07527	10.3454	3.22581	31.0361	93
ENSSSA1UGT000091	1.06289	4.60123	4.89062	0.920245	0.978124	7.36196	7.82499	6.44172	6.84687	6.74847	7.17291	5.52147	5.86875	1.22699	1.30417	7.36196	7.82499	7.05521	7.49895	9.81595	10.4333	1.53374	7.50095	4.60123	4.89062	6.13497	6.52083	4.29448	4.56458	4.90798	5.21666	8.58896	9.12916	3.98773	4.23854	5.21472	5.5427	1.84049	1.95625	1.84049	1.95625	326
ENSSSA1UGT000097	1.56418	5.89744	9.22464	2.05128	3.20857	4.87179	7.62035	10	15.6418	3.33333	5.21393	6.41026	10.0268	1.79487	2.8075	3.07692	4.81285	6.92308	10.8289	11.0256	17.2461	2.30769	21.2876	6.15385	9.62571	3.84615	6.01607	4.61538	7.21928	8.71795	13.6364	5.38462	8.42249	4.87179	7.62035	2.5641	4.01071	2.30769	3.60964	3.84615	6.01607	390
ENSSSA1UGT000098	3.05056	7.75076	23.6442	1.82371	5.56334	6.68693	20.3989	3.95137	12.0539	5.92705	18.0809	5.16717	15.7628	3.03951	9.27223	4.71125	14.372	6.07903	18.5445	10.3343	31.5256	0.911854	21.5601	2.43161	7.41779	8.05471	24.5714	5.16717	15.7628	6.07903	18.5445	6.53495	19.9353	6.07903	18.5445	5.77508	17.6172	0.911854	2.78167	2.58359	7.8814	658
ENSSSA1UGT000099	5.98716	7.03364	42.1115	3.0581	18.3094	3.66972	21.9712	3.66972	21.9712	6.42202	38.4496	7.03364	42.1115	4.58716	27.464	4.89297	29.295	6.72783	40.2806	10.7034	64.0827	1.52905	64.3907	3.66972	21.9712	4.89297	29.295	2.14067	12.8165	5.19878	31.1259	9.78593	58.5899	3.97554	23.8022	5.19878	31.1259	2.14067	12.8165	3.66972	21.9712	327
ENSSSA1UGT000100	5.7438	4.49827	25.8371	3.80623	21.8622	2.07612	11.9248	3.80623	21.8622	8.65052	49.6868	5.53633	31.7996	2.76817	15.8998	4.49827	25.8371	3.46021	19.8747	11.7647	67.5741	2.42215	62.5813	3.80623	21.8622	4.15225	23.8497	7.95848	45.7119	3.46021	19.8747	13.1488	75.524	6.57439	37.762	3.46021	19.8747	2.07612	11.9248	2.07612	11.9248	289
ENSSSA1UGT000104	3.85431	5.20446	20.0596	4.46097	17.194	1.6109	6.20893	2.3544	9.07459	5.20446	20.0596	7.18711	27.7014	3.71747	14.3283	3.59356	13.8507	4.33705	16.7164	7.80669	30.0894	0.991326	19.8856	2.72615	10.5074	5.57621	21.4925	3.22181	12.4179	8.55019	32.9551	14.1264	54.4475	9.29368	35.8208	4.7088	18.1492	2.85006	10.985	2.47831	9.5522	807
ENSSSA1UGT000106	2.54248	4.40367	11.1963	1.46789	3.73209	2.93578	7.46417	6.05505	15.3949	1.83486	4.66511	5.87156	14.9283	2.93578	7.46417	3.30275	8.3972	7.15596	18.1939	4.95413	12.5958	1.10092	12.3262	2.75229	6.99766	10.4587	26.5911	4.58716	11.6628	5.50459	13.9953	10.8257	27.5241	12.4771	31.7227	5.13761	13.0623	0.733945	1.86604	5.50459	13.9953	545
ENSSSA1UGT000112	1.66236	7.0632	11.7416	2.60223	4.32584	2.23048	3.70786	2.60223	4.32584	11.1524	18.5393	5.57621	9.26965	3.71747	6.17977	11.1524	18.5393	3.71747	6.17977	11.1524	18.5393	2.23048	26.1894	4.83271	8.0337	2.60223	4.32584	1.48699	2.47191	5.20446	8.65168	7.43494	12.3595	5.20446	8.65168	4.08922	6.79774	0.743494	1.23595	5.20446	8.65168	269
ENSSSA1UGT000114	1.28732	8.6747	11.1671	2.89157	3.72236	1.68675	2.17138	2.6506	3.41216	4.33735	5.58354	6.26506	8.06512	5.06024	6.51413	7.22892	9.3059	2.89157	3.72236	10.8434	13.9589	2.89157	32.2904	2.6506	3.41216	5.3012	6.82433	1.68675	2.17138	5.54217	7.13453	8.6747	11.1671	5.78313	7.44472	8.19277	10.5467	1.92771	2.48157	4.81928	6.20394	415
ENSSSA1UGT000117	3.12984	5.40721	16.9237	3.27103	10.2378	1.66889	5.22337	3.13752	9.81993	4.00534	12.5361	4.53939	14.2076	3.27103	10.2378	5.80774	18.1773	6.27503	19.6399	12.4833	39.0708	4.13885	70.0447	3.07076	9.61099	4.53939	14.2076	5.47397	17.1326	5.40721	16.9237	12.1495	38.0261	6.87583	21.5203	5.2737	16.5058	1.40187	4.38763	1.8024	5.64123	1498
ENSSSA1UGT000119	4.16606	5.71429	23.806	2.85714	11.903	3.80952	15.8707	5.2381	21.8222	6.66667	27.7737	6.19048	25.7899	3.33333	13.8869	3.80952	15.8707	7.61905	31.7414	9.52381	39.6767	1.42857	34.0086	6.19048	25.7899	6.66667	27.7737	4.7619	19.8384	6.19048	25.7899	5.71429	23.806	2.85714	11.903	5.71429	23.806	1.42857	5.95151	4.28571	17.8545	210
ENSSSA1UGT000125	2.61911	2.40964	6.31111	7.22892	18.9333	4.81928	12.6222	1.20482	3.15556	4.81928	12.6222	3.61446	9.46667	1.20482	3.15556	4.81928	12.6222	6.0241	15.7778	10.8434	28.4	1.20482	7.60375	8.43373	22.0889	9.63855	25.2444	2.40964	6.31111	10.8434	28.4	8.43373	22.0889	6.0241	15.7778	4.81928	12.6222	1.20482	3.15556	0	0	83
ENSSSA1UGT000126	1.52786	5.5914	8.54287	4.51613	6.90001	2.58065	3.94286	5.16129	7.88572	6.66667	10.1857	6.02151	9.20001	2.7957	4.27143	4.94624	7.55715	6.66667	10.1857	8.3871	12.8143	0.430108	3.67435	5.16129	7.88572	3.65591	5.58572	5.16129	7.88572	9.67742	14.7857	9.89247	15.1143	3.44086	5.25715	4.30108	6.57144	1.93548	2.95715	3.01075	4.60001	465
ENSSSA1UGT000130	5.23688	6.32111	33.1029	2.65487	13.9032	3.79267	19.8618	4.93047	25.8203	6.57396	34.427	5.18331	27.1444	2.90771	15.2273	7.45891	39.0614	9.1024	47.6682	9.73451	50.9785	2.2756	75.329	5.94185	31.1167	3.66625	19.1997	3.91909	20.5238	4.93047	25.8203	6.70038	35.0891	4.17193	21.8479	4.5512	23.8341	0.505689	2.64823	4.67762	24.4962	791
ENSSSA1UGT000139	3.60002	6.04797	21.7728	6.67362	24.0252	2.39833	8.63405	3.54536	12.7634	5.21376	18.7697	3.54536	12.7634	3.54536	12.7634	4.48384	16.1419	5.21376	18.7697	8.8634	31.9085	1.04275	22.7037	4.37956	15.7665	2.18978	7.88326	3.44108	12.388	10.6361	38.2901	11.9917	43.1703	5.83942	21.022	3.75391	13.5142	3.54536	12.7634	3.64964	13.1388	959
ENSSSA1UGT000141	3.05732	5.13141	15.6884	2.75344	8.41815	3.12891	9.56608	2.25282	6.88758	4.8811	14.9231	4.50563	13.7752	1.37672	4.20908	4.00501	12.2446	5.38173	16.4537	7.25907	22.1933	1.25156	19.635	3.37922	10.3314	9.26158	28.3156	1.62703	4.97436	9.63705	29.4635	15.3942	47.0651	11.3892	34.8205	2.62829	8.03551	2.37797	7.27022	2.37797	7.27022	799
ENSSSA1UGT000142	5.78979	5.82329	33.7156	2.00803	11.6261	2.20884	12.7887	4.61847	26.74	8.63454	49.9922	3.21285	18.6017	2.81124	16.2765	6.2249	36.0409	7.83133	45.3417	11.4458	66.2687	3.61446	121.864	5.02008	29.0652	2.81124	16.2765	4.41767	25.5774	4.41767	25.5774	7.42972	43.0165	5.82329	33.7156	7.02811	40.6913	2.00803	11.6261	2.61044	15.1139	498
ENSSSA1UGT000145	3.92144	3.5	13.725	1.5	5.88216	5	19.6072	4	15.6858	5.25	20.5876	5.25	20.5876	2	7.84288	6.75	26.4697	6.25	24.509	10.5	41.1751	2.75	37.7439	8	31.3715	4.25	16.6661	3.75	14.7054	5.25	20.5876	8.5	33.3322	2.75	10.784	7.75	30.3912	2.25	8.82324	4.75	18.6268	400
ENSSSA1UGT000148	6.63579	0.925926	6.14425	4.16667	27.6491	1.38889	9.21638	4.16667	27.6491	5.55556	36.8655	4.16667	27.6491	3.24074	21.5049	5.09259	33.7934	5.09259	33.7934	12.963	86.0195	0.462963	2.84456	2.77778	18.4328	5.55556	36.8655	9.72222	64.5146	9.72222	64.5146	10.1852	67.5868	6.94444	46.0819	4.62963	30.7213	2.31481	15.3606	0.925926	6.14425	216
ENSSSA1UGT000149	3.75772	5.32609	20.014	2.82609	10.6197	5.86957	22.0562	5.86957	22.0562	4.45652	16.7464	3.69565	13.8872	1.84783	6.94362	4.13043	15.521	8.36957	31.4505	11.5217	43.2955	2.3913	47.8595	5.76087	21.6477	4.8913	18.3802	3.36957	12.6619	4.67391	17.5633	13.587	51.056	5.65217	21.2393	3.36957	12.6619	0.543478	2.04224	1.84783	6.94362	920
ENSSSA1UGT000160	4.28687	4.49438	19.2668	5.29695	22.7073	2.88925	12.3858	3.37079	14.4501	6.26003	26.8359	4.33387	18.5787	3.21027	13.762	4.81541	20.643	7.54414	32.3407	9.95185	42.6622	0.802568	15.4629	6.26003	26.8359	2.08668	8.94531	2.24719	9.63341	8.02568	34.405	11.0754	47.4789	6.09952	26.1478	5.45746	23.3954	2.88925	12.3858	2.88925	12.3858	623
ENSSSA1UGT000161	4.14223	5.52995	22.9063	1.6129	6.68102	3.91705	16.2253	5.52995	22.9063	4.83871	20.043	5.76037	23.8608	2.53456	10.4987	7.8341	32.4506	11.0599	45.8127	10.5991	43.9038	2.76498	63.3355	4.14747	17.1798	4.14747	17.1798	3.22581	13.362	4.37788	18.1342	7.14286	29.5874	6.45161	26.7241	4.60829	19.0886	0.691244	2.86329	3.22581	13.362	434
ENSSSA1UGT000166	4.23634	5.99647	25.4031	2.1164	8.96579	4.05644	17.1844	4.7619	20.173	6.52557	27.6445	3.52734	14.943	2.1164	8.96579	5.64374	23.9088	6.34921	26.8974	9.17108	38.8518	1.94004	49.2829	5.11464	21.6673	5.11464	21.6673	3.1746	13.4487	5.99647	25.4031	7.76014	32.8746	4.7619	20.173	7.93651	33.6217	2.29277	9.71294	5.64374	23.9088	567
ENSSSA1UGT000167	5.07912	3.56083	18.0859	2.37389	12.0573	2.37389	12.0573	5.34125	27.1288	6.82493	34.6646	3.56083	18.0859	1.48368	7.53578	8.01187	40.6932	5.34125	27.1288	11.276	57.272	2.07715	37.5671	5.34125	27.1288	5.34125	27.1288	2.37389	12.0573	2.67062	13.5644	10.3858	52.7505	8.60534	43.7075	5.93472	30.1431	1.18694	6.02863	5.93472	30.1431	337
ENSSSA1UGT000168	5.05376	5.46763	27.6321	3.45324	17.4518	3.02158	15.2704	3.02158	15.2704	6.04317	30.5407	5.32374	26.9049	4.17266	21.0876	5.03597	25.4506	4.89209	24.7234	9.64029	48.7197	0.863309	23.855	5.46763	27.6321	6.04317	30.5407	4.89209	24.7234	8.05755	40.721	10.2158	51.6284	4.31655	21.8148	6.04317	30.5407	1.58273	7.99876	2.44604	12.3617	695
ENSSSA1UGT000174	3.90992	6.43478	25.1595	1.73913	6.79985	4.26087	16.6596	8.08696	31.6193	3.56522	13.9397	3.04348	11.8997	1.3913	5.43988	5.65217	22.0995	8.43478	32.9793	8.08696	31.6193	1.13043	28.4411	4.95652	19.3796	8.6087	33.6593	3.73913	14.6197	2.17391	8.49982	13.913	54.3988	5.65217	22.0995	5.65217	22.0995	1.30435	5.09989	2.17391	8.49982	1150
ENSSSA1UGT000175	5.3072	7.32759	38.8889	1.2931	6.86275	5.60345	29.7386	7.32759	38.8889	6.89655	36.6014	3.01724	16.0131	1.72414	9.15034	6.46552	34.3138	8.18966	43.4641	7.75862	41.1765	1.2931	50.2874	6.89655	36.6014	3.01724	16.0131	4.31034	22.8758	3.01724	16.0131	10.3448	54.902	3.44828	18.3007	9.05172	48.0393	0	0	3.01724	16.0131	232
ENSSSA1UGT000176	8.3783	3.11284	26.0803	8.94942	74.9809	2.33463	19.5602	3.89105	32.6004	3.89105	32.6004	7.393	61.9407	2.72374	22.8203	3.11284	26.0803	5.05837	42.3805	6.61479	55.4206	0.389105	10.148	7.00389	58.6807	3.50195	29.3403	4.66926	39.1204	10.8949	91.281	13.6187	114.101	4.66926	39.1204	1.94553	16.3002	4.66926	39.1204	1.55642	13.0401	257
ENSSSA1UGT000178	5.63629	5.6701	31.9584	2.83505	15.9792	2.83505	15.9792	4.63918	26.1478	7.21649	40.6743	3.86598	21.7898	1.54639	8.71592	5.41237	30.5057	7.98969	45.0323	12.1134	68.2747	1.03093	32.9468	4.89691	27.6004	3.09278	17.4318	3.09278	17.4318	8.50515	47.9376	8.24742	46.4849	5.15464	29.0531	5.92784	33.411	1.80412	10.1686	4.12371	23.2425	388
ENSSSA1UGT000179	9.09308	5.11628	46.5227	1.39535	12.688	3.25581	29.6054	3.72093	33.8347	6.51163	59.2108	4.18605	38.0641	2.7907	25.376	6.97674	63.4401	9.30233	84.5868	11.1628	101.504	1.86047	86.5539	4.18605	38.0641	4.65116	42.2934	0.930233	8.45868	8.37209	76.1281	11.1628	101.504	3.72093	33.8347	6.04651	54.9814	0.930233	8.45868	3.72093	33.8347	215
ENSSSA1UGT000182	3.74304	6.0462	22.6312	1.69837	6.35707	4.34783	16.2741	7.54076	28.2254	3.73641	13.9856	3.80435	14.2398	2.85326	10.6799	4.75543	17.7998	5.84239	21.8683	10.6658	39.9224	1.63043	36.8986	5.16304	19.3255	6.79348	25.4283	4.14402	15.5112	5.50272	20.5969	8.35598	31.2768	5.16304	19.3255	6.99728	26.1911	1.42663	5.33994	3.53261	13.2227	1472
ENSSSA1UGT000184	8.04128	2.95359	23.7506	1.89873	15.2683	9.70464	78.0377	10.7595	86.5201	5.06329	40.7153	4.43038	35.6259	3.16456	25.4471	7.80591	62.7695	10.1266	81.4307	6.75105	54.2871	0.843882	20.0427	3.79747	30.5365	7.80591	62.7695	3.5865	28.84	1.68776	13.5718	4.85232	39.0189	4.00844	32.233	4.43038	35.6259	2.1097	16.9647	4.21941	33.9295	474
ENSSSA1UGT000188	3.76596	7.05128	26.5548	0	0	5.76923	21.7267	9.61538	36.2111	5.12821	19.3126	4.48718	16.8985	0.641026	2.41408	1.28205	4.82815	7.69231	28.9689	8.33333	31.383	1.28205	34.0447	4.48718	16.8985	2.5641	9.6563	14.1026	53.1097	9.61538	36.2111	8.33333	31.383	5.76923	21.7267	1.92308	7.24223	0.641026	2.41408	1.28205	4.82815	156
ENSSSA1UGT000191	3.06345	3.85233	11.8014	3.04976	9.3428	3.04976	9.3428	6.58106	20.1608	8.1862	25.078	5.45746	16.7187	2.56822	7.86762	4.6549	14.2601	5.77849	17.7021	9.14928	28.0284	1.28411	15.1543	6.26003	19.1773	5.77849	17.7021	4.81541	14.7518	4.97592	15.2435	8.34671	25.5698	5.77849	17.7021	4.97592	15.2435	1.76565	5.40899	3.69181	11.3097	623
ENSSSA1UGT000194	3.30327	5.14019	16.9794	3.36449	11.1138	5.14019	16.9794	6.07477	20.0666	4.11215	13.5835	7.28972	24.0799	3.92523	12.9661	5.3271	17.5969	5.88785	19.4492	9.81308	32.4153	1.58879	26.9767	4.6729	15.4359	4.95327	16.362	3.36449	11.1138	5.51402	18.2143	7.28972	24.0799	4.39252	14.5097	8.2243	27.1671	1.21495	4.01332	2.71028	8.95279	1070
ENSSSA1UGT000202	1.89621	5.45723	10.3481	2.50737	4.75451	3.68732	6.99193	5.60472	10.6277	6.48968	12.3058	7.07965	13.4245	3.24484	6.1529	2.80236	5.31387	2.0649	3.91548	9.73451	18.4587	0.737463	7.63131	3.09735	5.87322	8.99705	17.0603	6.34218	12.0261	13.5693	25.7303	6.63717	12.5855	3.24484	6.1529	5.89971	11.1871	0.737463	1.39839	2.0649	3.91548	678
ENSSSA1UGT000207	1.61001	10.3448	16.6553	2.80172	4.51081	1.72414	2.77589	4.09483	6.59273	4.31034	6.93971	7.32759	11.7975	2.37069	3.81684	4.09483	6.59273	6.46552	10.4096	8.40517	13.5324	1.07759	17.9475	2.37069	3.81684	8.83621	14.2264	2.15517	3.46986	12.5	20.1252	7.32759	11.7975	5.38793	8.67464	4.52586	7.2867	2.37069	3.81684	1.50862	2.4289	464
ENSSSA1UGT000208	5.11581	6.12795	31.3494	0.942761	4.82299	5.25253	26.8709	5.85859	29.9714	4.51178	23.0814	6.73401	34.4499	2.0202	10.335	4.64646	23.7704	8.61953	44.0959	8.28283	42.3734	1.3468	42.2214	4.10774	21.0144	5.52189	28.2489	4.0404	20.6699	4.44444	22.7369	11.2458	57.5313	8.28283	42.3734	5.05051	25.8374	0.40404	2.06699	2.55892	13.091	1485
ENSSSA1UGT000210	4.73927	5.65584	26.8046	6.13718	29.0858	1.80505	8.55464	5.89651	27.9452	6.61853	31.367	2.88809	13.6874	4.45247	21.1015	3.97112	18.8202	7.46089	35.3592	7.94224	37.6404	0.481348	12.9023	4.33213	20.5311	3.2491	15.3984	5.77617	27.3749	8.06258	38.2107	11.071	52.4685	4.93381	23.3827	4.69314	22.2421	1.56438	7.41403	3.00842	14.2577	831
ENSSSA1UGT000211	4.8949	3.57724	17.5102	3.73984	18.3061	1.13821	5.57143	3.41463	16.7143	4.87805	23.8776	3.41463	16.7143	3.90244	19.102	7.31707	35.8163	7.80488	38.2041	13.6585	66.8571	2.92683	51.2494	3.41463	16.7143	4.71545	23.0816	4.71545	23.0816	6.01626	29.449	9.5935	46.9592	6.01626	29.449	5.52846	27.0612	1.13821	5.57143	3.08943	15.1224	615
ENSSSA1UGT000215	3.94389	10.0791	39.7506	2.37154	9.35309	4.34783	17.1473	6.52174	25.721	4.94071	19.4856	8.69565	34.2947	1.3834	5.45597	7.50988	29.6181	7.70751	30.3976	7.50988	29.6181	1.58103	62.8469	4.54545	17.9268	3.75494	14.8091	2.7668	10.9119	3.35968	13.2502	6.32411	24.9416	4.94071	19.4856	9.09091	35.8535	0.988142	3.89712	1.58103	6.23539	506
ENSSSA1UGT000217	3.68611	13.5057	49.7836	2.29885	8.47381	5.17241	19.0661	4.31034	15.8884	5.17241	19.0661	9.48276	34.9545	3.16092	11.6515	6.03448	22.2438	4.88506	18.0068	7.75862	28.5991	2.29885	114.445	4.88506	18.0068	4.02299	14.8292	2.58621	9.53304	3.44828	12.7107	7.75862	28.5991	4.5977	16.9476	6.32184	23.303	0.574713	2.11845	1.72414	6.35536	348
ENSSSA1UGT000219	5.58261	3.2419	18.0982	5.23691	29.2356	3.49127	19.4904	3.74065	20.8826	4.98753	27.8435	5.48628	30.6278	4.48878	25.0591	5.23691	29.2356	4.73815	26.4513	6.98254	38.9808	1.99501	36.1062	5.48628	30.6278	4.2394	23.6669	2.49377	13.9217	10.7232	59.8634	11.2219	62.6478	6.48379	36.1965	3.74065	20.8826	3.49127	19.4904	2.49377	13.9217	401
ENSSSA1UGT000221	4.73337	3.30073	15.6236	3.05623	14.4663	2.93399	13.8876	3.91198	18.5169	6.60147	31.2472	3.05623	14.4663	3.05623	14.4663	6.72372	31.8259	7.09046	33.5618	8.43521	39.927	0.977995	15.2798	5.13447	24.3034	4.27873	20.2528	5.62347	26.618	8.19071	38.7697	11.0024	52.0787	5.74572	27.1966	5.13447	24.3034	2.81174	13.309	2.93399	13.8876	818
ENSSSA1UGT000222	4.72544	4.93066	23.2995	1.77196	8.37327	7.55008	35.6774	7.70416	36.4055	2.15716	10.1935	4.00616	18.9309	2.38829	11.2857	4.00616	18.9309	7.16487	33.8571	7.08783	33.4931	2.23421	52.056	6.00924	28.3963	6.8567	32.4009	6.16333	29.1244	6.16333	29.1244	11.7874	55.7004	3.85208	18.2028	4.46841	21.1152	1.30971	6.18894	2.38829	11.2857	1298
ENSSSA1UGT000225	2.12174	4.25532	9.02866	3.03951	6.44905	3.79939	8.06131	7.75076	16.4451	4.86322	10.3185	6.68693	14.1879	2.43161	5.15924	6.231	13.2205	9.57447	20.3145	4.86322	10.3185	1.51976	13.7214	5.6231	11.9307	2.12766	4.51433	3.79939	8.06131	10.1824	21.6043	8.05471	17.09	6.99088	14.8328	3.34347	7.09395	0.759878	1.61226	4.10334	8.70621	658
ENSSSA1UGT000227	3.7505	8.91089	33.4203	1.9802	7.42674	2.47525	9.28342	7.92079	29.707	4.9505	18.5668	2.9703	11.1401	0.990099	3.71337	6.93069	25.9936	7.92079	29.707	10.396	38.9904	3.9604	132.358	4.45545	16.7102	3.9604	14.8535	6.43564	24.1369	4.45545	16.7102	5.44554	20.4235	3.46535	12.9968	6.93069	25.9936	0.990099	3.71337	4.45545	16.7102	202
ENSSSA1UGT000228	4.0979	7.18232	29.4324	4.78821	19.6216	2.02578	8.30146	3.68324	15.0936	4.60405	18.8669	4.78821	19.6216	4.23573	17.3576	3.49908	14.3389	5.89319	24.1497	6.814	27.9231	0.368324	10.8407	4.23573	17.3576	6.99816	28.6778	3.31492	13.5842	8.83978	36.2245	11.6022	47.5447	7.36648	30.1871	4.78821	19.6216	2.20994	9.05614	2.76243	11.3202	543
ENSSSA1UGT000231	5.59329	8.09859	45.2977	1.40845	7.87787	5.6338	31.5115	8.4507	47.2672	6.69014	37.4199	3.16901	17.7252	3.16901	17.7252	4.57746	25.6031	10.5634	59.084	10.2113	57.1145	2.8169	127.599	2.46479	13.7863	4.92958	27.5725	4.57746	25.6031	2.46479	13.7863	7.39437	41.3588	4.22535	23.6336	4.57746	25.6031	0.704225	3.93893	3.87324	21.6641	284
ENSSSA1UGT000236	2.69122	7.12531	19.1758	0.2457	0.661233	1.9656	5.28986	5.40541	14.5471	0.737101	1.9837	3.4398	9.25726	4.6683	12.5634	2.7027	7.27356	6.63391	17.8533	2.7027	7.27356	0.2457	4.71149	0.737101	1.9837	18.6732	50.2537	2.457	6.61233	2.457	6.61233	6.63391	17.8533	3.6855	9.9185	21.3759	57.5273	0.4914	1.32247	7.61671	20.4982	407
ENSSSA1UGT000237	7.91407	5.36913	42.4916	12.0805	95.6062	4.69799	37.1802	6.04027	47.8031	2.68456	21.2458	13.4228	106.229	4.02685	31.8687	2.68456	21.2458	4.69799	37.1802	0.671141	5.31145	1.34228	57.0357	6.71141	53.1145	2.01342	15.9344	4.02685	31.8687	10.7383	84.9833	9.39597	74.3603	3.3557	26.5573	2.01342	15.9344	0	0	4.02685	31.8687	149
ENSSSA1UGT000238	4.63493	2.7907	12.9347	5.46512	25.3304	1.74419	8.08417	4.88372	22.6357	5	23.1746	6.39535	29.642	3.48837	16.1683	4.4186	20.4799	9.4186	43.6545	6.39535	29.642	0.813953	10.5282	5.81395	26.9472	3.13953	14.5515	5.23256	24.2525	13.0233	60.3618	10.5814	49.044	4.18605	19.402	3.72093	17.2462	1.27907	5.92839	2.2093	10.24	860
ENSSSA1UGT000240	6.28692	3.27869	20.6128	4.91803	30.9193	6.01093	37.7902	4.37158	27.4838	7.10383	44.6612	10.3825	65.274	3.82514	24.0483	3.82514	24.0483	6.55738	41.2257	12.0219	75.5804	1.63934	33.7915	3.82514	24.0483	4.91803	30.9193	0.546448	3.43547	3.27869	20.6128	3.27869	20.6128	7.10383	44.6612	7.65027	48.0966	1.63934	10.3064	3.82514	24.0483	183
ENSSSA1UGT000242	1.59775	5.23139	8.35847	0	0	3.42052	5.46515	5.23139	8.35847	6.03622	9.64439	8.65191	13.8236	4.22535	6.75107	4.82897	7.71551	5.83501	9.32291	2.41449	3.85775	1.00604	8.40892	4.62777	7.39403	12.4748	19.9317	3.82294	6.10811	3.21932	5.14367	10.4628	16.7169	3.62173	5.78663	10.0604	16.074	0.201207	0.32148	4.62777	7.39403	497
ENSSSA1UGT000243	2.98873	2.43161	7.26742	3.95137	11.8096	1.82371	5.45056	3.64742	10.9011	6.99088	20.8938	3.34347	9.9927	3.64742	10.9011	8.20669	24.5275	5.77508	17.2601	12.462	37.2455	3.03951	22.0894	2.43161	7.26742	5.77508	17.2601	5.77508	17.2601	3.34347	9.9927	9.42249	28.1612	7.59878	22.7107	4.86322	14.5348	2.12766	6.35899	3.34347	9.9927	329
ENSSSA1UGT000245	2.47123	5.01567	12.3949	0.940439	2.32404	3.76176	9.29616	7.52351	18.5923	4.07524	10.0708	5.64263	13.9442	1.25392	3.09872	7.21003	17.8176	11.2853	27.8885	6.58307	16.2683	2.19436	27.1988	4.38871	10.8455	4.07524	10.0708	3.44828	8.52148	7.21003	17.8176	5.95611	14.7189	4.38871	10.8455	7.21003	17.8176	2.50784	6.19744	5.32915	13.1696	319
ENSSSA1UGT000246	3.12317	4.13123	12.9025	2.30863	7.21022	1.70109	5.3128	3.15917	9.86662	6.80437	21.2512	4.25273	13.282	3.52369	11.0051	8.38396	26.1845	6.92588	21.6307	11.9077	37.1896	3.15917	40.7613	6.07533	18.9743	3.28068	10.2461	4.49575	14.041	4.73876	14.7999	9.35601	29.2204	6.07533	18.9743	6.31835	19.7332	0.850547	2.6564	2.55164	7.96919	823
ENSSSA1UGT000247	4.93611	5.36013	26.4582	2.34506	11.5755	4.43886	21.9107	5.44389	26.8716	5.10888	25.218	4.94137	24.3912	3.01508	14.8827	5.69514	28.1118	5.52764	27.285	14.6566	72.3467	2.26131	59.8301	6.1139	30.1789	5.27638	26.0448	2.59631	12.8157	5.69514	28.1118	7.95645	39.2739	6.1139	30.1789	4.10385	20.2571	0.921273	4.5475	2.42881	11.9889	1194
ENSSSA1UGT000249	4.21393	4.39684	18.528	5.18602	21.8535	2.14205	9.02646	4.39684	18.528	5.52424	23.2788	3.26945	13.7772	3.60767	15.2025	5.63698	23.7538	5.07328	21.3785	10.7103	45.1323	0.901917	16.7107	5.07328	21.3785	4.2841	18.0529	3.83315	16.1526	7.32807	30.88	11.274	47.5077	4.17136	17.5778	6.42616	27.0794	1.91657	8.07631	4.8478	20.4283	887
ENSSSA1UGT000250	1.76426	5.25502	9.27122	1.70015	2.99951	4.79134	8.45317	6.18238	10.9073	2.93663	5.18098	5.40958	9.5439	2.93663	5.18098	5.87326	10.362	4.48223	7.9078	14.9923	26.4502	2.93663	27.2261	6.95518	12.2707	4.9459	8.72585	3.24575	5.72634	5.25502	9.27122	9.11901	16.0883	5.25502	9.27122	5.10046	8.99854	0.927357	1.6361	1.70015	2.99951	647
ENSSSA1UGT000253	6.40419	6.17978	39.5765	1.87266	11.9929	2.99625	19.1886	3.93258	25.185	7.6779	49.1707	6.17978	39.5765	2.43446	15.5907	5.99251	38.3772	6.74157	43.1743	11.6105	74.3558	2.43446	96.3472	4.68165	29.9822	2.80899	17.9893	3.74532	23.9857	2.43446	15.5907	12.3596	79.1529	4.30712	27.5836	5.80524	37.1779	2.05993	13.1922	3.74532	23.9857	534
ENSSSA1UGT000260	3.41973	6.01719	20.5772	1.05062	3.59284	4.48902	15.3512	4.87106	16.6577	4.96657	16.9843	4.20248	14.3713	3.91595	13.3915	5.34862	18.2908	6.20821	21.2304	12.6074	43.114	1.52818	31.4455	3.4384	11.7584	7.35435	25.1499	3.53391	12.085	5.92168	20.2505	7.8319	26.783	4.96657	16.9843	7.06781	24.17	2.38777	8.16554	2.29226	7.83892	1047
ENSSSA1UGT000265	3.80141	6.79612	25.8348	1.94175	7.38137	3.39806	12.9174	2.91262	11.0721	3.8835	14.7627	1.94175	7.38137	4.36893	16.6081	6.79612	25.8348	6.79612	25.8348	10.1942	38.7522	2.42718	62.7059	2.42718	9.22672	4.36893	16.6081	5.33981	20.2988	7.76699	29.5255	8.25243	31.3708	6.79612	25.8348	6.79612	25.8348	3.39806	12.9174	3.39806	12.9174	206
ENSSSA1UGT000267	7.71061	6.69145	51.5952	1.48699	11.4656	1.67286	12.8988	1.48699	11.4656	2.41636	18.6316	3.71747	28.664	2.7881	21.498	4.64684	35.83	6.69145	51.5952	8.55019	65.9272	1.85874	95.9018	3.34572	25.7976	7.62082	58.7612	4.46097	34.3968	11.71	90.2915	13.0112	100.324	7.99257	61.6276	5.57621	42.996	2.60223	20.0648	1.67286	12.8988	538
ENSSSA1UGT000268	2.11607	6.45724	13.664	2.79232	5.90876	3.4904	7.38595	5.2356	11.0789	5.41012	11.4482	6.1082	12.9254	4.88656	10.3403	4.71204	9.97103	3.66492	7.75524	9.5986	20.3114	0.52356	7.15393	4.71204	9.97103	5.93368	12.5561	4.53752	9.60173	11.1693	23.635	8.726	18.4649	3.31588	7.01665	5.2356	11.0789	1.04712	2.21578	2.44328	5.17016	573
ENSSSA1UGT000269	1.28774	8.77531	11.3004	1.63934	2.11106	3.27869	4.22211	5.78592	7.45079	1.92864	2.4836	11.4754	14.7774	4.72517	6.08481	2.4108	3.10449	3.08582	3.97375	7.81099	10.0586	0.385728	4.35887	2.7001	3.47703	9.9325	12.7905	4.8216	6.20899	15.3327	19.7446	6.55738	8.44422	3.56798	4.59465	4.33944	5.58809	0.48216	0.620899	0.96432	1.2418	1037
ENSSSA1UGT000272	1.83979	4.96689	9.13805	3.31126	6.09203	2.98013	5.48283	6.95364	12.7933	5.62914	10.3565	3.31126	6.09203	2.31788	4.26442	4.30464	7.91964	4.96689	9.13805	7.28477	13.4025	3.64238	33.2843	7.61589	14.0117	6.29139	11.5749	10.2649	18.8853	6.29139	11.5749	7.28477	13.4025	6.62252	12.1841	3.31126	6.09203	0.331126	0.609203	2.31788	4.26442	302
ENSSSA1UGT000273	1.68674	5.18784	8.75053	2.68336	4.52614	2.86225	4.82788	4.29338	7.24182	6.08229	10.2592	3.22004	5.43136	1.9678	3.31917	7.33453	12.3714	6.79785	11.4662	8.58676	14.4836	2.68336	23.4808	5.36673	9.05227	2.86225	4.82788	4.47227	7.54356	7.69231	12.9749	12.7013	21.4237	5.00894	8.44879	6.26118	10.561	1.9678	3.31917	1.9678	3.31917	559
ENSSSA1UGT000274	1.73251	4.51389	7.82037	2.60417	4.51175	4.34028	7.51959	5.90278	10.2266	9.80903	16.9943	3.99306	6.91802	2.95139	5.11332	5.03472	8.72272	5.90278	10.2266	12.1528	21.0549	0.868056	6.78852	4.25347	7.3692	5.20833	9.02351	2.77778	4.81254	5.12153	8.87312	8.50694	14.7384	5.46875	9.47468	6.77083	11.7306	1.21528	2.10549	2.60417	4.51175	1152
ENSSSA1UGT000276	2.03607	6.19919	12.622	1.82927	3.72452	5.4878	11.1736	6.91057	14.0704	3.86179	7.86287	3.04878	6.20753	2.84553	5.7937	5.0813	10.3459	8.53659	17.3811	11.0772	22.554	1.52439	19.2408	5.89431	12.0012	5.18293	10.5528	3.96341	8.06979	4.26829	8.69054	8.02846	16.3465	6.50407	13.2427	5.89431	12.0012	1.21951	2.48301	2.64228	5.37986	984
ENSSSA1UGT000278	2.74302	5.828	15.9863	0.923952	2.53441	5.11727	14.0368	10.8742	29.8281	2.84293	7.7982	3.76688	10.3326	2.1322	5.84865	5.11727	14.0368	9.66596	26.5139	9.66596	26.5139	2.77186	44.3117	4.19332	11.5023	5.25942	14.4267	5.18834	14.2317	6.04122	16.5712	6.46766	17.7409	4.90405	13.4519	5.47264	15.0115	1.0661	2.92432	2.70078	7.40829	1407
ENSSSA1UGT000280	3.09202	4.8433	14.9756	3.27635	10.1306	0.997151	3.08321	1.85185	5.72596	5.55556	17.1779	2.849	8.80918	2.849	8.80918	9.11681	28.1894	6.83761	21.142	12.6781	39.2008	2.99145	44.7988	3.27635	10.1306	5.41311	16.7374	4.8433	14.9756	4.5584	14.0947	9.97151	30.8321	7.83476	24.2252	5.55556	17.1779	1.7094	5.28551	2.99145	9.24964	702
ENSSSA1UGT000282	5.92214	9.53437	56.4639	2.66075	15.7574	5.54324	32.8279	7.76053	45.959	6.20843	36.7672	2.88248	17.0705	2.66075	15.7574	4.43459	26.2623	6.87361	40.7065	9.09091	53.8377	2.88248	162.756	3.99113	23.6361	4.43459	26.2623	3.32594	19.6967	4.87805	28.8885	8.64745	51.2115	3.54767	21.0098	7.76053	45.959	1.10865	6.56557	1.77384	10.5049	451
ENSSSA1UGT000283	1.05935	6.7696	7.17134	1.18765	1.25813	4.3943	4.65508	8.4323	8.93272	1.90024	2.01301	5.93824	6.29065	3.91924	4.15183	3.68171	3.9002	4.15677	4.40346	9.38242	9.93923	2.019	14.479	5.81948	6.16484	4.27553	4.52927	6.65083	7.04553	9.73872	10.3167	8.55107	9.05854	4.86936	5.15833	5.22565	5.53577	0.593824	0.629065	2.49406	2.64207	842
ENSSSA1UGT000284	3.42131	5.14706	17.6097	3.52941	12.0752	3.97059	13.5846	4.41176	15.094	5.58824	19.1191	6.47059	22.1379	2.79412	9.55955	5.14706	17.6097	6.02941	20.6285	7.79412	26.6661	1.17647	20.7173	3.67647	12.5784	6.02941	20.6285	3.08824	10.5658	10.1471	34.7163	11.7647	40.2507	3.38235	11.5721	6.91176	23.6473	1.32353	4.52821	1.61765	5.53448	680
ENSSSA1UGT000285	7.93646	3.85542	30.5984	4.33735	34.4232	3.13253	24.8612	2.40964	19.124	4.09639	32.5108	4.33735	34.4232	7.46988	59.2844	6.50602	51.6348	4.81928	38.248	9.87952	78.4084	0.963855	29.4924	4.33735	34.4232	6.74699	53.5472	4.81928	38.248	9.15663	72.6712	11.0843	87.9704	3.85542	30.5984	4.33735	34.4232	1.68675	13.3868	2.16867	17.2116	415
ENSSSA1UGT000286	1.62885	6.72269	10.9502	2.10084	3.42195	7.56303	12.319	4.62185	7.52829	6.30252	10.2658	3.78151	6.15951	2.10084	3.42195	4.62185	7.52829	7.56303	12.319	9.2437	15.0566	1.68067	18.4038	5.88235	9.58146	5.04202	8.21268	2.94118	4.79073	7.56303	12.319	6.30252	10.2658	6.30252	10.2658	4.62185	7.52829	2.10084	3.42195	2.94118	4.79073	238
ENSSSA1UGT000287	1.99761	6.47482	12.9342	4.12034	8.23083	4.25114	8.49213	5.7554	11.497	4.05494	8.10018	8.6985	17.3762	2.28908	4.57268	2.61609	5.22593	5.03597	10.0599	7.97907	15.9391	1.17724	15.2266	3.0739	6.14046	4.57816	9.14537	3.46632	6.92435	10.2681	20.5118	10.2027	20.3811	3.66252	7.3163	7.32505	14.6326	2.35448	4.70333	2.61609	5.22593	1529
ENSSSA1UGT000288	7.0134	5.0813	35.6372	2.84553	19.9568	1.42276	9.97841	2.64228	18.5313	4.6748	32.7862	2.84553	19.9568	1.21951	8.55292	4.47154	31.3607	6.70732	47.0411	14.0244	98.3586	5.0813	181.083	2.64228	18.5313	4.47154	31.3607	3.65854	25.6588	8.53659	59.8705	12.8049	89.8057	6.30081	44.1901	4.47154	31.3607	3.04878	21.3823	3.04878	21.3823	492
ENSSSA1UGT000289	2.7666	3.57143	9.88073	3.78151	10.4619	3.36134	9.29951	7.56303	20.9239	5.67227	15.6929	2.73109	7.55585	2.31092	6.39341	5.46218	15.1117	8.82353	24.4112	9.66387	26.7361	3.15126	31.1368	6.09244	16.8554	5.2521	14.5305	4.83193	13.368	4.62185	12.7868	8.61345	23.83	3.9916	11.0432	6.72269	18.599	1.05042	2.9061	2.73109	7.55585	476
ENSSSA1UGT000290	1.03683	3.77358	3.91255	2.26415	2.34753	2.64151	2.73878	3.58491	3.71692	6.98113	7.23821	3.20755	3.32567	2.83019	2.93441	7.73585	8.02072	7.54717	7.8251	10.1887	10.5639	2.83019	11.0732	5.84906	6.06445	3.20755	3.32567	5.4717	5.67319	6.41509	6.65133	9.81132	10.1726	5.4717	5.67319	6.03774	6.26008	1.69811	1.76065	2.45283	2.54316	530
ENSSSA1UGT000293	4.62003	3.80952	17.6001	9.04762	41.8003	2.38095	11.0001	4.28571	19.8001	7.61905	35.2002	4.28571	19.8001	3.33333	15.4001	3.80952	17.6001	5.2381	24.2002	8.09524	37.4002	0.952381	16.762	4.28571	19.8001	3.80952	17.6001	5.2381	24.2002	9.04762	41.8003	14.2857	66.0004	3.33333	15.4001	2.85714	13.2001	2.85714	13.2001	1.42857	6.60004	210
ENSSSA1UGT000294	6.59815	6.1674	40.6934	2.64317	17.44	5.72687	37.7868	5.28634	34.8801	7.48899	49.4135	7.04846	46.5068	2.64317	17.44	6.60793	43.6001	7.92952	52.3201	11.4537	75.5735	0.881057	35.8532	2.64317	17.44	5.72687	37.7868	2.20264	14.5334	4.84581	31.9734	8.37004	55.2268	4.84581	31.9734	3.52423	23.2534	0.881057	5.81335	3.0837	20.3467	227
ENSSSA1UGT000300	1.5528	3.86819	6.00652	2.5788	4.00435	6.01719	9.34348	7.73639	12.013	4.44126	6.89637	4.58453	7.11884	2.86533	4.44927	3.29513	5.11667	7.02006	10.9007	8.16619	12.6804	1.7192	10.3264	6.16046	9.56594	10.4585	16.2399	3.29513	5.11667	5.30086	8.23116	12.3209	19.1319	4.87106	7.56377	2.72206	4.22681	0.429799	0.667391	2.149	3.33696	698
ENSSSA1UGT000307	1.27899	7.94521	10.1619	3.0137	3.8545	3.28767	4.20491	3.83562	4.90573	5.75342	7.35859	5.20548	6.65777	2.73973	3.50409	5.47945	7.00818	5.75342	7.35859	10.137	12.9651	0.273973	2.78407	2.73973	3.50409	6.84932	8.76023	4.93151	6.30737	10.411	13.3155	8.49315	10.8627	4.10959	5.25614	5.47945	7.00818	0.821918	1.05123	2.73973	3.50409	365
ENSSSA1UGT000309	2.57649	7.09593	18.2826	1.97109	5.0785	6.04468	15.5741	9.19842	23.6997	3.81078	9.81843	5.78187	14.8969	2.36531	6.0942	4.20499	10.8341	7.75296	19.9754	6.5703	16.9283	0.65703	12.0122	4.07359	10.4956	5.38765	13.8812	4.59921	11.8498	5.78187	14.8969	10.3811	26.7468	5.38765	13.8812	6.4389	16.5898	0.394218	1.0157	2.1025	5.41707	761
ENSSSA1UGT000311	2.65864	4.02075	10.6897	3.37224	8.96557	8.0415	21.3794	5.70687	15.1725	4.79896	12.7587	3.37224	8.96557	3.76135	10.0001	5.44747	14.4828	6.87419	18.276	8.43061	22.4139	2.85344	30.5024	5.05837	13.4484	5.83658	15.5173	4.53956	12.069	5.31777	14.138	6.87419	18.276	4.02075	10.6897	4.92866	13.1035	0.648508	1.72415	6.09598	16.207	771
[truncated: 12,496 more rows]

## Sheet: Calculation
				Cellular content of Protein	Amino acid	Amino acid quantity	Fractional contribution	Molecular weight monomer	Molecular weight of water	gmomomer/Molprotein	gPortein/Molprotein	gmomomer/gprotein	Molmonomer/gDW	Mmolmonomer/gDW	total protein (mmol/gDW)	cost of protein synthesis and processing (mmol ATP/mmol AA)	total cost for protein synthesis
[truncated: 21 more rows]
