# Supplementary material for: In silico prediction of candidate gene targets for the management of African cassava whitefly (Bemisia tabaci, SSA1-SG1), a key vector of viruses causing cassava brown streak disease
Source: PeerJ. 2024 Feb 23;12:e16949. doi: 10.7717/peerj.16949 (PMC10896082; doi:10.7717/peerj.16949)
Supplement: Supplemental Information 7 [file peerj-12-16949-s007.xlsx]

## Sheet: Results
	Well	Fluor	Target	Content	Sample	Biological Set Name	Cq	Cq Mean	Cq Std. Dev	Starting Quantity (SQ)	Log Starting Quantity	SQ Mean	SQ Std. Dev	Set Point	Well Note
	A01	SYBR	AQP	Unkn-01	Gut		34.2446	34.3465	0.324235					55.2
	A02	SYBR	AQP	Unkn-01	Gut		34.7094	34.3465	0.324235					55.2
	A03	SYBR	AQP	Unkn-01	Gut		34.0855	34.3465	0.324235					55.2
	A04	SYBR	SUC1	Unkn-02	Gut		29.1034	28.6289	0.417021					55.2
	A05	SYBR	SUC1	Unkn-02	Gut		28.3207	28.6289	0.417021					55.2
	A06	SYBR	SUC1	Unkn-02	Gut		28.4625	28.6289	0.417021					55.2
	A07	SYBR	SUC2	Unkn-03	Gut		24.1436	24.3004	0.161069					55.2
	A08	SYBR	SUC2	Unkn-03	Gut		24.4654	24.3004	0.161069					55.2
	A09	SYBR	SUC2	Unkn-03	Gut		24.2923	24.3004	0.161069					55.2
	A10	SYBR	RPL13	Unkn-04	Gut		24.4422	24.5753	0.139591					55.2
	A11	SYBR	RPL13	Unkn-04	Gut		24.7206	24.5753	0.139591					55.2
	A12	SYBR	RPL13	Unkn-04	Gut		24.5629	24.5753	0.139591					55.2
	B01	SYBR	AQP	Unkn-05	Whole-body		34.4163	34.2744	0.301206					55.2
	B02	SYBR	AQP	Unkn-05	Whole-body		34.4784	34.2744	0.301206					55.2
	B03	SYBR	AQP	Unkn-05	Whole-body		33.9285	34.2744	0.301206					55.2
	B04	SYBR	SUC1	Unkn-06	Whole-body		28.6562	28.8078	0.138509					55.2
	B05	SYBR	SUC1	Unkn-06	Whole-body		28.8396	28.8078	0.138509					55.2
	B06	SYBR	SUC1	Unkn-06	Whole-body		28.9277	28.8078	0.138509					55.2
	B07	SYBR	SUC2	Unkn-07	Whole-body		24.3676	24.317	0.061229					55.2
	B08	SYBR	SUC2	Unkn-07	Whole-body		24.3344	24.317	0.061229					55.2
	B09	SYBR	SUC2	Unkn-07	Whole-body		24.2489	24.317	0.061229					55.2
	B10	SYBR	RPL13	Unkn-08	Whole-body		20.8443	20.8831	0.17662					55.2
	B11	SYBR	RPL13	Unkn-08	Whole-body		20.7292	20.8831	0.17662					55.2
	B12	SYBR	RPL13	Unkn-08	Whole-body		21.0759	20.8831	0.17662					55.2
	C01	SYBR	LysA	Unkn-09	Bacteriocytes		24.184	24.0896	0.08291					55.2
	C02	SYBR	LysA	Unkn-09	Bacteriocytes		24.0564	24.0896	0.08291					55.2
	C03	SYBR	LysA	Unkn-09	Bacteriocytes		24.0284	24.0896	0.08291					55.2
	C04	SYBR	ArgH	Unkn-10	Bacteriocytes		32.8819	32.1509	0.998316					55.2
	C05	SYBR	ArgH	Unkn-10	Bacteriocytes		31.0135	32.1509	0.998316					55.2
	C06	SYBR	ArgH	Unkn-10	Bacteriocytes		32.5573	32.1509	0.998316					55.2
	C07	SYBR	BCAT	Unkn-11	Bacteriocytes		24.4373	24.5255	0.0773448					55.2
	C08	SYBR	BCAT	Unkn-11	Bacteriocytes		24.5571	24.5255	0.0773448					55.2
	C09	SYBR	BCAT	Unkn-11	Bacteriocytes		24.582	24.5255	0.0773448					55.2
	C10	SYBR	RPL13	Unkn-12	Bacteriocytes		22.973	22.9928	0.20381					55.2
	C11	SYBR	RPL13	Unkn-12	Bacteriocytes		22.7996	22.9928	0.20381					55.2
	C12	SYBR	RPL13	Unkn-12	Bacteriocytes		23.2058	22.9928	0.20381					55.2
	D01	SYBR	LysA	Unkn-13	Whole-body		24.3741	24.7072	0.342954					55.2
	D02	SYBR	LysA	Unkn-13	Whole-body		25.0592	24.7072	0.342954					55.2
	D03	SYBR	LysA	Unkn-13	Whole-body		24.6882	24.7072	0.342954					55.2
	D04	SYBR	ArgH	Unkn-14	Whole-body		31.406	30.9766	0.607258					55.2
	D05	SYBR	ArgH	Unkn-14	Whole-body			0	0			0	0	55.2
	D06	SYBR	ArgH	Unkn-14	Whole-body		30.5472	30.9766	0.607258					55.2
	D07	SYBR	BCAT	Unkn-15	Whole-body		23.8941	23.9863	0.12804					55.2
	D08	SYBR	BCAT	Unkn-15	Whole-body		24.1325	23.9863	0.12804					55.2
	D09	SYBR	BCAT	Unkn-15	Whole-body		23.9323	23.9863	0.12804					55.2
	E01	SYBR	dapB	Unkn-16	Bacteriocytes		26.8783	26.699	0.175524					55.2
	E02	SYBR	dapB	Unkn-16	Bacteriocytes		26.691	26.699	0.175524					55.2
	E03	SYBR	dapB	Unkn-16	Bacteriocytes		26.5275	26.699	0.175524					55.2
	E04	SYBR	AAT	Unkn-17	Bacteriocytes		30.6167	30.5858	0.211193					55.2
	E05	SYBR	AAT	Unkn-17	Bacteriocytes		30.3608	30.5858	0.211193					55.2
	E06	SYBR	AAT	Unkn-17	Bacteriocytes		30.7798	30.5858	0.211193					55.2
	E07	SYBR		Unkn	NTC			0	0			0	0	55.2
	E08	SYBR		Unkn	NTC			0	0			0	0	55.2
	E09	SYBR		Unkn	NTC			0	0			0	0	55.2
	F01	SYBR	dapB	Unkn-18	Whole-body		26.2864	26.2165	0.141123					55.2
	F02	SYBR	dapB	Unkn-18	Whole-body		26.0541	26.2165	0.141123					55.2
	F03	SYBR	dapB	Unkn-18	Whole-body		26.309	26.2165	0.141123					55.2
	F04	SYBR	AAT	Unkn-19	Whole-body		27.1608	27.0721	0.216457					55.2
	F05	SYBR	AAT	Unkn-19	Whole-body		27.2302	27.0721	0.216457					55.2
	F06	SYBR	AAT	Unkn-19	Whole-body		26.8254	27.0721	0.216457					55.2
	F07	SYBR		Unkn	NRTC			0	0			0	0	55.2
	F08	SYBR		Unkn	NRTC			0	0			0	0	55.2
	F09	SYBR		Unkn	NRTC			0	0			0	0	55.2
	G01	SYBR	B-Tubulin	Unkn-20	Whole-body		21.8743	21.5347	0.299456					55.2
	G02	SYBR	B-Tubulin	Unkn-20	Whole-body		21.4217	21.5347	0.299456					55.2
	G03	SYBR	B-Tubulin	Unkn-20	Whole-body		21.3083	21.5347	0.299456					55.2
	G04	SYBR	B-Tubulin	Unkn-21	Gut		26.7347	26.9449	0.216522					55.2
	G05	SYBR	B-Tubulin	Unkn-21	Gut		26.9327	26.9449	0.216522					55.2
	G06	SYBR	B-Tubulin	Unkn-21	Gut		27.1672	26.9449	0.216522					55.2
	G07	SYBR	B-Tubulin	Unkn-22	Bacteriocytes		24.9878	24.8551	0.166445					55.2
	G08	SYBR	B-Tubulin	Unkn-22	Bacteriocytes		24.9092	24.8551	0.166445					55.2
	G09	SYBR	B-Tubulin	Unkn-22	Bacteriocytes		24.6684	24.8551	0.166445					55.2

## Sheet: expression
	Target	Sample	Mean Cq	Mean Efficiency Corrected Cq	Normalized Expression	Relative Normalized Expression	Regulation	Compared to Regulation Threshold	P-Value	Exceeds P-Value Threshold
	AAT	Bacteriocytes	30.5858	30.5858	0.00987621	0.574901	-1.73943	No change	0.0141298	Yes
	AAT	Whole-body	27.0721	27.0721	0.017179	1	1	No change		No
	AQP	Gut	34.3465	34.3465	0.00260152	22.301	22.301	Up regulated	0.00147573	No
	AQP	Whole-body	34.2744	34.2744	0.000116655	1	1	No change		No
	ArgH	Bacteriocytes	32.1509	32.1509	0.00333764	2.90935	2.90935	No change		No
	ArgH	Whole-body	30.9766	30.9766	0.00114721	1	1	No change		No
	BCAT	Bacteriocytes	24.5255	24.5255	0.659049	4.51853	4.51853	Up regulated	1.9772e-05	No
	BCAT	Whole-body	23.9863	23.9863	0.145855	1	1	No change		No
	B-Tubulin	Bacteriocytes	24.8551	24.8551				No change	0.0454433	Yes
	B-Tubulin	Gut	26.9449	26.9449				No change	0.0210015	Yes
	B-Tubulin	Whole-body	21.5347	21.5347				No change		No
	dapB	Bacteriocytes	26.699	26.699	0.146097	4.69972	4.69972	Up regulated	0.000373685	No
	dapB	Whole-body	26.2165	26.2165	0.0310864	1	1	No change		No
	LysA	Bacteriocytes	24.0896	24.0896	0.891529	10.0743	10.0743	Up regulated	1.42984e-05	No
	LysA	Whole-body	24.7072	24.7072	0.0884953	1	1	No change		No
	RPL13	Bacteriocytes	22.9928	22.9928				No change	0.0204967	Yes
	RPL13	Gut	24.5753	24.5753				No change	0.00265802	No
	RPL13	Whole-body	20.8831	20.8831				No change		No
	SUC1	Gut	28.6289	28.6289	0.136901	26.5402	26.5402	Up regulated	0.00325547	No
	SUC1	Whole-body	28.8078	28.8078	0.00515827	1	1	No change		No
	SUC2	Gut	24.3004	24.3004	2.75038	23.7142	23.7142	Up regulated	0.000116718	No
	SUC2	Whole-body	24.317	24.317	0.11598	1	1	No change		No

## Sheet: qPCR VALIDATION
	Description	Value	Use	Results	Exclude Wells	All excluded wells
	Negative control with a Cq less than	38	TRUE		FALSE
	NTC with a Cq less than	38	TRUE		FALSE
	NRT with a Cq less than	38	TRUE		FALSE
	Positive control with a Cq greater than	30	TRUE		FALSE
	Unknown without a Cq	NaN	TRUE	SYBR:D5	E7	E8	E9	F7	F8	F9.	FALSE
	Standard without a Cq	NaN	TRUE		FALSE
	Efficiency greater than	110	TRUE
	Efficiency less than	90	TRUE
	Std Curve R^2 less than	0.98	TRUE
	Replicate group Cq Std Dev greater than	0.2	TRUE	SYBR:A1	A2	A3	A4	A5	A6	B1	B2	B3	C4	C5	C6	C10	C11	C12	D1	D2	D3	D4	D6	E4	E5	E6	F4	F5	F6	G1	G2	G3	G4	G5	G6.	FALSE

## Sheet: Melting Endpoint
	Well	Fluor	Target	Content	Sample	Melt Temperature	Peak Height	Begin Temperature	End Temperature	Well Note
	A01	SYBR	AQP	Unkn-01	Gut	80	1612.05	75.5	86.5
	A02	SYBR	AQP	Unkn-01	Gut	80	1570.2	76	90
	A03	SYBR	AQP	Unkn-01	Gut	79.5	1473.27	75.5	87.5
	A04	SYBR	SUC1	Unkn-02	Gut	76.5	1709.72	61.5	88.5
	A05	SYBR	SUC1	Unkn-02	Gut	76.5	1909.68	63	88.5
	A06	SYBR	SUC1	Unkn-02	Gut	76.5	1901.58	63	88.5
	A07	SYBR	SUC2	Unkn-03	Gut	78	2749.41	71	88.5
	A08	SYBR	SUC2	Unkn-03	Gut	78	2984.12	69.5	88
	A09	SYBR	SUC2	Unkn-03	Gut	78	2800.11	69	88.5
	A10	SYBR	RPL13	Unkn-04	Gut	81.5	1601.88	78	86.5
	A11	SYBR	RPL13	Unkn-04	Gut	81.5	1655.7	77	85
	A12	SYBR	RPL13	Unkn-04	Gut	81.5	1676.22	77	85.5
	B01	SYBR	AQP	Unkn-05	Whole-body	79.5	1560.25	75	85.5
	B02	SYBR	AQP	Unkn-05	Whole-body	80	1477.5	74	88
	B03	SYBR	AQP	Unkn-05	Whole-body	79.5	1633.12	74.5	90
	B04	SYBR	SUC1	Unkn-06	Whole-body	76.5	1951.95	70	87.5
	B05	SYBR	SUC1	Unkn-06	Whole-body	76.5	1989.49	61	88
	B06	SYBR	SUC1	Unkn-06	Whole-body	76.5	1830.08	61.5	89
	B07	SYBR	SUC2	Unkn-07	Whole-body	78	2763.77	70.5	89.5
	B08	SYBR	SUC2	Unkn-07	Whole-body	78	2775.92	71	88
	B09	SYBR	SUC2	Unkn-07	Whole-body	78	2637.2	71.5	87.5
	B10	SYBR	RPL13	Unkn-08	Whole-body	81.5	1483.09	78	87
	B11	SYBR	RPL13	Unkn-08	Whole-body	81.5	1488.2	77.5	87
	B12	SYBR	RPL13	Unkn-08	Whole-body	81.5	1823.6	76	86
	C01	SYBR	LysA	Unkn-09	Bacteriocytes	84.5	1852.47	79	90.5
	C02	SYBR	LysA	Unkn-09	Bacteriocytes	84.5	1728.05	79	90
	C03	SYBR	LysA	Unkn-09	Bacteriocytes	84.5	1826.64	79	90
	C04	SYBR	ArgH	Unkn-10	Bacteriocytes	85.5	1262.69	80	90
	C05	SYBR	ArgH	Unkn-10	Bacteriocytes	85.5	1336.95	80	90.5
	C06	SYBR	ArgH	Unkn-10	Bacteriocytes	85	1293.46	79	90.5
	C07	SYBR	BCAT	Unkn-11	Bacteriocytes	80.5	2532.65	76	90
	C08	SYBR	BCAT	Unkn-11	Bacteriocytes	80.5	2758.84	75.5	89.5
	C09	SYBR	BCAT	Unkn-11	Bacteriocytes	80.5	2756.42	74	89
	C10	SYBR	RPL13	Unkn-12	Bacteriocytes	81.5	1553.72	77	90
	C11	SYBR	RPL13	Unkn-12	Bacteriocytes	81.5	1667.25	76.5	89
	C12	SYBR	RPL13	Unkn-12	Bacteriocytes	81.5	1703.95	76.5	85.5
	D01	SYBR	LysA	Unkn-13	Whole-body	84.5	1911.18	79.5	90
	D02	SYBR	LysA	Unkn-13	Whole-body	84.5	1569.09	79	90
	D03	SYBR	LysA	Unkn-13	Whole-body	84.5	1862.74	79	90
	D04	SYBR	ArgH	Unkn-14	Whole-body	85.5	1361.82	80	90
	D05	SYBR	ArgH	Unkn-14	Whole-body	None	None	None	None
	D06	SYBR	ArgH	Unkn-14	Whole-body	85.5	1313.88	77.5	90.5
	D07	SYBR	BCAT	Unkn-15	Whole-body	80.5	2741.54	74.5	90
	D08	SYBR	BCAT	Unkn-15	Whole-body	80.5	2899.86	75	89
	D09	SYBR	BCAT	Unkn-15	Whole-body	80.5	2864.96	72.5	88.5
	E01	SYBR	dapB	Unkn-16	Bacteriocytes	80	2351.84	75	86
	E02	SYBR	dapB	Unkn-16	Bacteriocytes	80	2365.72	74.5	90.5
	E03	SYBR	dapB	Unkn-16	Bacteriocytes	80	2202.91	75	90.5
	E04	SYBR	AAT	Unkn-17	Bacteriocytes	79	2280.22	73	89.5
	E05	SYBR	AAT	Unkn-17	Bacteriocytes	79	2155.78	71	83
	E06	SYBR	AAT	Unkn-17	Bacteriocytes	79	2284.18	73	85
	E07	SYBR		Unkn	NTC	None	None	None	None
	E08	SYBR		Unkn	NTC	None	None	None	None
	E09	SYBR		Unkn	NTC	None	None	None	None
	F01	SYBR	dapB	Unkn-18	Whole-body	80	2323.35	74	87
	F02	SYBR	dapB	Unkn-18	Whole-body	80	2197.82	72	84
	F03	SYBR	dapB	Unkn-18	Whole-body	80	2305.75	71.5	91
	F04	SYBR	AAT	Unkn-19	Whole-body	79	2592.78	73	90
	F05	SYBR	AAT	Unkn-19	Whole-body	79	2682.72	72.5	86
	F06	SYBR	AAT	Unkn-19	Whole-body	79	2441.29	72.5	91
	F07	SYBR		Unkn	NRTC	None	None	None	None
	F08	SYBR		Unkn	NRTC	None	None	None	None
	F09	SYBR		Unkn	NRTC	None	None	None	None
	G01	SYBR	B-Tubulin	Unkn-20	Whole-body	83.5	1724.8	78.5	87
	G02	SYBR	B-Tubulin	Unkn-20	Whole-body	83.5	1728.39	79	87
	G03	SYBR	B-Tubulin	Unkn-20	Whole-body	83.5	1576.1	78.5	87
	G04	SYBR	B-Tubulin	Unkn-21	Gut	83.5	1413.66	78.5	87
	G05	SYBR	B-Tubulin	Unkn-21	Gut	83.5	1546.6	79	87
	G06	SYBR	B-Tubulin	Unkn-21	Gut	83.5	1498.44	78.5	87
	G07	SYBR	B-Tubulin	Unkn-22	Bacteriocytes	83.5	1690.28	78.5	87
	G08	SYBR	B-Tubulin	Unkn-22	Bacteriocytes	83.5	1555.55	78.5	87
	G09	SYBR	B-Tubulin	Unkn-22	Bacteriocytes	83.5	1626.22	79	87

## Sheet: Amplification
	Cycle	A1	A2	A3	A4	A5	A6	A7	A8	A9	A10	A11	A12	B1	B2	B3	B4	B5	B6	B7	B8	B9	B10	B11	B12	C1	C2	C3	C4	C5	C6	C7	C8	C9	C10	C11	C12	D1	D2	D3	D4	D5	D6	D7	D8	D9	E1	E2	E3
	1	-169.749	-104.249	-79.4158	-232.419	-119.309	-161.052	-90.8931	-103.255	-39.9348	-27.5489	-44.4785	-109.841	-117.101	-47.7876	-32.5026	-136.477	18.7124	-155.936	-32.9833	-41.3541	-13.1745	-1.59386	-3.76964	-34.5243	-38.2101	10.4789	-6.40771	-84.8915	-19.967	-55.8912	-48.9509	-14.047	-6.8377	30.7771	22.7824	-45.173	-51.1508	31.1338	-8.21222	-60.9762	23.9572	8.96459	-24.2255	-29.6538	-7.31305	-204.299	-24.5608	-145.388
	2	-84.0197	-54.2575	-37.9737	-163.814	-30.5389	-111.296	-50.1787	-50.5788	6.84911	17.5062	3.90282	-48.0676	-64.9285	-42.878	-24.4276	-118.832	25.224	-122.409	-23.169	-28.1211	6.82072	2.9097	0.77073	5.01713	-9.8897	7.79291	-10.5824	-69.1054	-17.9134	-60.853	-49.5802	-0.415578	-11.0749	25.5986	16.6393	6.32318	-25.1219	29.3948	-13.4449	-59.1765	20.0218	10.4145	-25.4594	-19.7727	-17.3575	-136.195	-14.1694	-139.424
	3	-43.1129	-29.7605	-16.2461	-116.189	29.8864	-61.6691	-20.7613	-42.6705	16.4588	9.87039	13.3126	-8.41126	-40.1156	-26.2776	-17.1707	-75.2225	45.1123	-87.1391	-7.0873	-10.26	21.7776	9.37496	5.07656	17.4464	5.16861	11.4597	-5.32468	-54.2358	-8.69169	-45.9837	-39.2019	17.9783	-8.73445	19.7452	21.6217	13.7074	-14.4962	22.5427	7.81101	-45.7659	16.8408	17.4301	-15.8295	-11.5899	-10.6331	-113.119	21.5869	-105.265
	4	-22.7975	-25.4329	-2.53906	-51.9843	24.0994	-3.51575	23.5199	-27.575	11.1654	10.0608	17.0334	3.70558	-33.0786	-22.7659	1.36184	-15.3327	30.8692	-31.5031	13.1044	17.3718	21.0754	11.9393	7.17791	15.9489	6.66022	20.8509	-5.43557	-26.8416	9.21441	-34.2783	-14.7799	29.5355	8.00499	12.7302	19.8256	9.81478	-11.2254	25.3782	10.9535	-27.8657	20.1489	19.7489	-11.8182	-8.05332	6.87991	-84.3152	39.6428	-46.0964
	5	4.83931	0.1437	18.218	15.6808	16.2536	24.7744	35.2074	7.65211	14.4224	5.14002	18.2679	4.85857	-9.98617	-3.43134	13.5228	24.8126	18.7304	23.6224	22.1887	28.6284	7.87022	11.2671	8.16637	7.40278	23.2403	19.7243	6.57002	2.84024	19.3222	-17.268	12.0683	31.6272	25.4298	8.75025	17.583	8.33868	-8.30738	18.7381	17.6353	-20.0211	18.2827	13.6548	-2.32975	-0.606186	17.6896	-53.7562	33.251	20.1636
	6	6.23475	14.4145	14.4007	47.5644	3.17182	35.453	25.1086	25.6199	2.65885	10.3739	5.28578	11.9542	4.03553	11.2241	15.877	48.5883	18.6748	48.4819	15.9592	23.1791	1.79662	3.42653	6.12755	6.28765	12.8748	13.4143	23.2333	25.0263	19.0229	8.18722	34.4648	19.6973	31.7247	7.95842	2.58832	11.2707	8.57941	13.1267	11.4294	3.3955	11.6197	7.59965	17.9292	12.2753	27.5384	18.4581	19.8771	48.1195
	7	19.4646	21.8815	23.9069	62.642	13.8272	34.7891	11.2595	33.3479	0.0594759	1.55388	1.68383	15.029	16.7829	20.4669	13.3967	28.8549	3.47379	30.3061	16.6816	14.0044	-1.27027	6.1542	2.04143	-1.25968	11.7192	9.81553	23.7108	33.6934	8.60046	29.3979	32.0406	11.067	26.3549	4.3808	-3.7588	3.27192	19.6837	-0.828074	12.4721	21.0564	10.2921	6.32566	31.5745	28.3223	22.3959	64.3824	4.64393	55.709
	8	15.6831	24.5251	13.7675	60.3769	-9.1799	23.9407	10.4899	40.7679	-5.23246	1.00417	-0.672135	9.72046	23.393	20.8364	8.79586	24.0501	5.42192	35.251	9.93218	6.29288	-4.93507	3.2707	10.9536	-2.74772	0.503349	7.08757	20.9283	27.4208	11.6275	37.5655	27.8757	3.58483	19.0882	-7.12518	-3.58834	2.77151	21.608	-13.0463	8.55245	31.3096	7.52243	2.01099	37.7142	23.5278	18.6293	103.235	-5.81327	41.6644
	9	14.3344	11.3887	11.2832	41.6934	-2.19609	9.25227	4.29622	32.3379	-10.0035	-1.20101	-2.3471	-1.44763	20.9245	24.4286	3.57086	23.3311	-3.69094	22.9177	3.76716	-3.91116	-0.344599	-7.05448	-2.23544	-1.52766	0.778925	-3.74374	14.6765	25.8799	2.73567	41.0261	19.2038	-4.98458	7.20531	-8.32212	-6.88104	0.750404	29.0238	-12.3508	-1.68426	26.5176	-1.44376	-1.92754	26.704	24.4781	9.16882	91.6106	-9.45792	38.5832
	10	19.7028	9.81786	1.48444	19.6586	-17.2142	12.886	-10.6919	15.3716	-20.2584	-2.17254	-6.51433	0.64373	28.0078	8.11285	8.85493	6.25351	-15.9138	25.1447	-0.607216	-3.93049	-10.848	-6.99125	-3.90009	-10.6672	-2.63632	-8.52061	4.64649	20.4401	5.03701	26.0251	2.54503	-12.9611	-3.00307	-8.59685	-10.5274	-17.8601	18.6893	-20.553	-10.9139	38.5731	-0.492917	1.02996	16.3685	13.5176	2.87808	67.6203	-17.585	29.364
	11	19.5877	12.6032	-10.4789	19.5571	-15.5513	-0.160038	-6.20946	8.86191	-17.075	0.58457	-7.69809	14.6545	15.5905	8.0794	1.62481	0.745924	-17.735	9.82308	-11.2815	-12.1298	-11.1081	2.51992	-0.153168	-5.91788	-5.55924	-14.8306	0.383561	16.5093	5.41193	17.4145	5.61458	-17.0503	-6.49878	-11.2491	-14.043	-4.60273	8.71582	11.1405	-4.33492	29.0092	-9.47763	-5.57073	2.73985	3.3985	-8.54061	55.3643	-22.1826	14.1282
	12	10.014	9.16417	-7.43071	10.2622	-14.821	-11.9174	-15.1538	-2.91499	-14.5741	-10.1401	-1.21152	-4.72675	18.8317	7.34802	-5.72351	6.4091	-22.0601	0.111961	-14.8939	-8.44276	-13.546	-5.27981	-3.82638	-17.7354	-10.2906	-15.0482	-7.87518	13.6695	-7.81804	20.9789	-8.39693	-26.8618	-16.9775	-12.6324	-14.0842	-8.74444	13.849	7.62443	-15.3161	20.3287	0.444789	-1.23633	-3.03638	0.419498	-16.0554	47.6021	-22.4685	5.6313
	13	3.02867	6.52645	4.77762	6.13788	-14.4597	1.52064	-27.4439	-3.70091	35.5186	-2.58036	-12.9923	0.114313	11.7925	5.48706	0.00733146	2.57252	-14.4739	-2.49615	-20.3696	-16.2506	-13.3053	-5.99773	8.42605	-8.53862	-14.5654	-18.045	-16.7489	13.7922	-9.12565	14.0283	-12.1934	-25.6234	-24.2975	-15.6052	-13.0364	-16.8866	7.4858	-6.25098	-18.3052	13.5125	-3.76143	-4.93768	-9.19515	-3.40645	-13.4871	19.3283	-29.1257	1.57944
	14	5.4945	16.069	-3.70173	1.52792	-17.8249	-17.4469	-27.3524	-23.4509	26.6641	-13.6287	-21.485	-3.08754	9.81398	0.490022	2.06296	-2.84276	-21.8147	-0.441858	-21.0511	-19.0153	-12.102	8.22981	17.3614	-3.86724	-20.0703	-20.0788	-23.265	5.81297	-6.58978	0.304161	-19.0805	-27.882	-30.3372	-11.5383	-16.4721	-11.549	-4.10558	-13.9697	-8.62346	14.7375	-13.0779	-3.95913	-14.7793	-13.6011	-26.5061	2.09846	-32.6966	-12.7885
	15	6.68887	0.402226	4.65639	-8.30658	-15.4739	-21.2927	-24.2931	-20.596	-19.2213	-9.38241	-18.3529	-5.97002	18.9139	4.55697	-0.38417	-7.47035	-21.8045	-6.57314	-21.0608	-20.4037	-6.1784	31.251	47.8361	21.7842	-21.8712	-21.1221	-30.1274	1.71155	-1.00502	1.33852	-18.4073	-35.6464	-35.6376	-9.83072	-11.0616	-13.8216	-7.47185	-16.427	-9.79847	3.61628	-14.9524	-10.5787	-26.2632	-21.645	-29.8154	-5.18592	-33.5762	-15.0407
	16	-2.70364	-2.12537	-15.2596	-6.32812	-19.2298	-14.5669	-29.195	-29.5401	-27.7764	-10.2036	-17.0915	-8.9748	11.1336	-5.88764	-10.2805	-17.2162	-27.5264	-9.68525	-27.6805	-23.1977	-4.55869	78.3841	87.4211	36.0659	-17.966	-24.6364	-34.0995	-5.7655	-11.1077	-7.06371	-25.2311	-29.9972	-41.011	-3.36412	-7.04834	-6.88959	-11.1808	-22.5931	-16.1691	4.95696	-10.7399	-9.6391	-33.4254	-22.1895	-30.0644	-14.1693	-39.4364	-21.1805
	17	-3.9878	-14.5941	-8.92332	-19.7815	-26.9143	-21.7471	-12.2122	-25.2914	-28.0283	-4.08794	-18.3374	-10.625	-2.00563	5.27937	-8.23873	-15.4586	-25.8252	-7.61255	-16.2772	-18.4375	-0.848997	162.853	180.531	109.432	-15.9462	-22.1132	9.47056	-11.144	-9.26954	-13.5421	-19.9258	-36.4165	-36.4401	12.7867	19.9111	16.1448	-11.1439	-21.6884	-8.10226	-5.55968	-12.686	-21.1876	-32.4612	-23.1788	-23.8613	-27.2121	-43.3666	-32.0807
	18	-2.03081	-4.58127	-15.2055	-20.1641	-31.6418	-27.0682	-6.99284	-16.4345	-13.6897	12.3438	1.70012	8.17558	8.51144	-3.11753	-10.1369	-20.267	-36.4502	-18.1346	-10.2354	-2.68488	18.9623	334.864	349.142	255.693	-8.74282	-7.70997	26.9269	-8.63203	-12.6999	-14.4102	-10.3739	-30.758	-19.521	50.5481	58.5578	48.9284	2.37277	-19.1307	-0.816779	-5.05123	-15.5341	-16.4585	-22.2485	-21.069	-13.0069	-47.1956	-35.8322	-27.2524
	19	-2.25359	-14.5262	-8.8515	-28.0241	-18.6201	-18.2866	21.7537	16.4528	2.96214	39.9509	20.3159	27.9541	-3.24547	-7.78465	-2.0132	-28.3818	-29.8218	-24.9338	19.8898	17.1649	42.857	657.63	672.116	506.524	16.9947	25.564	52.9288	-17.388	-16.7161	-11.5867	11.1639	-9.18135	-6.85591	129.223	143.786	110.247	17.2929	-6.38147	16.3607	-15.2011	-13.466	-17.9042	17.3318	13.631	24.3212	-46.7565	-34.0685	-24.2038
	20	-3.87656	-4.1999	-17.059	-34.1259	-12.6477	-24.2543	85.7469	48.8714	64.7729	94.2618	61.9818	72.4616	-3.53858	-4.74244	-13.0057	-13.3873	-24.8929	-25.9245	79.8265	77.8841	105.334	1230.49	1251.18	973.364	72.6009	87.6215	110.67	-16.0011	-11.7496	-16.1892	54.3253	43.1114	28.6581	267.417	294.566	226.058	69.3729	21.0208	56.4991	-14.6244	-10.851	-12.9881	84.0948	67.5697	92.2535	-42.8003	-28.2395	-15.6376
	21	-13.7661	-9.87508	-16.3091	-28.4812	-12.5596	-15.2216	201.05	135.881	167.871	189.053	149.009	168.261	-0.0208078	-1.0501	-3.76974	-2.92323	-22.7061	-23.6446	172.604	179.545	216.457	1970.35	2079.5	1778.81	184.671	211.395	235.925	-17.5747	-8.69531	-20.8744	151.212	127.082	116.112	545.386	597.978	465.099	164.815	85.1185	138.051	-6.60176	-7.8457	-17.3597	230.962	196.328	231.353	-33.1781	-0.542379	0.891861
	22	-7.09707	-12.0096	-17.1688	-28.0438	-11.9708	-5.66196	433.278	317.825	379.038	387.937	320.106	344.898	14.0539	-4.79044	-1.76324	1.72746	-5.68161	-5.36301	363.333	381.317	431.729	2426.79	2692.75	2784.19	416.075	457.362	483.692	-18.4607	-4.92959	-21.7849	338.9	292.985	280.416	1046.62	1140.02	887.512	357.163	215.18	296.701	-14.1577	-9.65581	-12.0837	501.339	414.37	501.01	-0.479454	51.5294	51.5703
	23	-16.6627	-15.2895	-6.07363	-20.4781	36.5684	17.1571	865.395	671.542	766.08	756.426	614.139	675.706	-17.5935	3.85587	-4.65893	6.61617	12.6726	11.8715	732.938	761.623	822.546	2926.56	3185.79	3320.18	830.336	928.268	954.679	-20.7079	3.03293	-19.2686	690.86	625.709	607.574	1877.6	2034.39	1642.73	728.071	467.243	602.464	-17.1695	-10.842	-8.29118	1020.81	860.429	1003.16	68.4723	133.263	139.811
	24	-18.6899	-12.1232	-24.0175	7.36044	91.0064	71.9148	1660.47	1315.55	1489.94	1421.83	1199.67	1295.53	-6.26003	-5.05195	-2.69539	46.4549	35.6771	48.9502	1417.6	1453.15	1545.2	3489.79	3764.67	4118.43	1611.77	1775.04	1813.55	-18.1869	23.073	-20.5172	1353.41	1243.55	1222.95	2779.96	2972.89	2675.05	1406.64	930.681	1160.62	-1.39635	-12.1657	2.50565	1953.94	1668.37	1916.99	210.052	296.299	322.146
	25	-18.9762	-11.6552	-3.65973	85.1969	189.088	165.832	3016.2	2474.92	2739.61	2401.67	2109.3	2289.65	-17.9878	-5.88136	5.7142	148.167	119.819	121.706	2607.79	2655.41	2790.31	4113.32	4421.24	4982.52	2934.8	3194.91	3277.62	-7.63817	52.3701	-17.4978	2500.67	2341.31	2309.22	3297.19	3524.04	3344.31	2605.54	1772.59	2169.77	0.222451	-13.276	28.9156	3514.7	3077.79	3461.87	494.963	612.02	669.047
	26	-13.274	-3.46558	1.466	205.103	395.875	354.699	5073.78	4335.57	4652.62	3148.75	3061.1	3216.18	-7.75273	1.07768	6.32356	312.553	279.054	271.233	4423.44	4530.73	4666.85	4746.95	5070.42	5920.35	4910.75	5191.16	5350.65	2.76025	96.669	-5.82025	4341.36	4135.23	4084.54	3922.59	4184.68	4049.39	4488.08	3166.54	3829.32	31.1092	-13.2306	74.2216	5518.93	5164.31	5612.67	1022.11	1175.27	1294.45
	27	0.880131	-4.13549	6.62013	445.475	790.607	708.632	6912.21	6400.13	6490.24	3765.04	3664.88	3840.85	3.78817	18.7037	34.412	622.956	558.201	547.719	6179.96	6425.09	6426.76	5362.44	5681.8	6826.64	6822.28	6912.26	7170.65	15.9967	184.236	21.8682	6262.04	6206.88	6144.49	4659.38	4954.15	4857.1	6569.68	5012.44	5917.64	94.6284	-4.43136	159.517	7350.53	7172.89	7608.59	1970.59	2159.14	2357.36
	28	11.8736	20.1404	22.6978	909.284	1485.37	1355.82	8436.38	8189.9	8042.03	4470.19	4398.54	4600.71	12.4489	34.827	47.445	1199.84	1081.4	1041.58	7693.73	8001.35	7880.79	5946.34	6240.51	7671.93	8565.07	8441.96	8803.5	62.4033	338.254	62.5073	7944.38	8082.5	8004.58	5412.57	5737.2	5745.72	8419.86	6607.64	7834.3	189.804	-10.819	333.449	8942.87	9035.61	9379.31	3285.97	3560.64	3716.47
	29	40.3656	37.7028	51.6782	1718.6	2638.5	2435.47	9620.79	9671.27	9281.9	5288.21	5285.6	5514.7	29.006	63.117	90.8162	2198.48	2003	1918.55	8942.07	9225.66	9003.14	6497.93	6758.03	8452.04	10107.4	9729.99	10196.6	143.817	602.805	147.936	9341.75	9723.68	9627.38	6149.25	6499.57	6622.96	9990.65	8112.71	9548.71	391.77	1.89669	672.393	10333.7	10697.6	10917.8	4488.29	4778.84	4772.47
	30	104.753	70.2096	118.834	3039.61	4419.67	4145.81	10580.4	10898.7	10299.8	6085.48	6181.5	6423.3	87.232	123.612	174.806	3788.53	3493.8	3353.63	9985.18	10214.2	9910.91	7009.57	7224.59	9170.01	11415.9	10790.6	11404	298.316	1069.35	328.221	10515.1	11140.2	11034.1	6836.47	7210.69	7445.92	11301	9427.92	11022.8	748.705	-5.18754	1283.66	11508.5	12128.5	12217.4	5672.64	5974.28	5827.63
	31	214.377	142.074	253.473	4556.27	6226.55	5973.85	11373.2	11919.1	11135.4	6855.8	7039.97	7288.07	185.114	231.353	310.402	5714.7	5456.4	5198.57	10848.9	11020.3	10651.8	7474.67	7641.33	9828.94	12486.5	11634.3	12371.9	577.941	1839.32	660.247	11472.7	12309	12201.3	7467.18	7859.51	8202.53	12370.6	10540.4	12254.5	1412.72	-4.35489	2328.08	12462.2	13297.5	13265.7	6801.36	7114.98	6845.02
	32	413.219	302.067	494.318	5904.88	7813.13	7607.37	12011.3	12748.4	11800.5	7569.08	7841.37	8087.98	373.701	411.644	571.549	7478.05	7285.4	6909.13	11551.7	11671.2	11245.1	7914.05	8021.73	10425.1	13324.5	12277.9	13121.4	1073.86	3013.55	1264.94	12232.4	13244.1	13145.6	8048.5	8459.2	8905.57	13206.7	11421.3	13230.2	2502.5	-4.92551	3706	13220.8	14232.8	14096.5	7927.56	8241.08	7826.29
	33	824.856	609.184	946.509	7088.42	9065.65	8901.61	12525.6	13416.9	12338.1	8226.11	8597.73	8835.24	736.603	760.414	1057.68	8928.05	8832.46	8346.11	12119	12198.8	11725.4	8321.41	8367.72	10970.1	13967	12785.4	13713.3	1959.79	4605.48	2323.91	12841	13993	13893.2	8576.88	8997.46	9540.53	13852	12118.9	13992.4	4146.48	-1.67621	5050.64	13838	14994.3	14765.8	8944.97	9259.22	8698.94
	34	1555.62	1142.84	1748.22	8043.48	10021.1	9889.82	12945.9	13971.7	12790.5	8828.9	9288.99	9525.54	1385.21	1366.64	1916.61	10038.1	10045.7	9470.09	12604.1	12634.6	12120.2	8707.85	8687.71	11468.5	14486.2	13195.7	14192.3	3369.41	5987.5	4019.57	13336.9	14616.2	14513.7	9072.6	9496.72	10126.9	14369.3	12676.9	14605.1	5760.91	-2.50634	6407.63	14348.3	15628.8	15317.7	9851.35	10157.2	9467.19
	35	2780.41	2146.9	2999.47	8783.27	10731	10619.5	13274.2	14416.1	13146.9	9363.14	9911.29	10142.8	2513.96	2387.75	3276.94	10846.6	10948.4	10303.7	12977.9	12975.2	12427.4	9042.77	8964.11	11919.5	14898.4	13520.7	14563.9	5113.89	7290.93	5972.86	13731.1	15112.5	14997.7	9506.64	9936.6	10639.4	14776.3	13114.1	15078.8	7211.22	1.33305	7759.23	14761.3	16136.7	15760.9	10609.3	10912.9	10111.3
	36	4310.73	3607.85	4292.22	9377.52	11264.5	11177.9	13537.9	14766.2	13434.1	9839.41	10452.1	10681.6	4010.84	3800.77	4664.73	11471.2	11625.2	10938.8	13280.9	13255.3	12677.5	9351.27	9208.73	12319.6	15242.7	13785.1	14860.1	6635.64	8472.64	7685.58	14046.6	15517.7	15394.4	9894.41	10331.6	11108.5	15101.5	13461.9	15468.4	8485.32	3.56986	9076.01	15103	16541.9	16121.2	11252.5	11554.9	10660.4
	37	5604.94	5013.88	5332.28	9850.14	11668.5	11612.6	13754.7	15044.6	13663.4	10257.5	10949.6	11164.8	5307	5012.78	5965.66	11962.6	12155.5	11434.5	13526.8	13487.7	12893	9627.37	9426.11	12681.1	15523.4	14004.4	15101.4	7936.43	9559.63	9155.71	14308	15849.7	15724.5	10240.4	10681.5	11530.6	15364.3	13747.9	15789.6	9655.01	4.28718	10236.3	15392.4	16875	16426.1	11792.3	12097.5	11129.4
	38	6886.31	6357.12	6346.19	10230.4	11996.9	11949.8	13933.4	15272.1	13861.2	10636	11391.1	11587.9	6608.26	6173.95	7175.34	12355.3	12577.6	11827.2	13749	13679.2	13071	9892.66	9621.71	13008	15745.1	14186.2	15307	9057.83	10493.9	10459.6	14527.7	16132.7	15998.9	10546.6	10993.5	11917.9	15578.3	13985.7	16052.5	10672.9	13.7658	11216.3	15632.9	17151.3	16677.1	12262.5	12564.6	11536.4
	39	8120.61	7597.29	7269.84	10537.3	12281.2	12238.4	14090.4	15327.6	14032	10978.2	11800.1	11991.1	7877.74	7245.41	8302.82	12669.8	12924.2	12139	13940.5	13837.4	13225.5	10131.9	9800.83	13308.7	15944.8	14336.8	15483.5	10070.9	11265.6	11631.1	14715.8	16369.1	16234.7	10839.2	11287.5	12263.5	15765.6	14182.6	16254.4	11496.6	17.744	12039	15828.6	17395.1	16896.9	12668	12970.8	11888.8
	40	9334.91	8814.69	8134.42	10810.4	12555.4	12496	14233.8	15220.9	14194.3	11298.1	12180.8	12378.4	9133.17	8282.37	9369.94	12943.9	13221.5	12403	14110	13982.5	13369	10363.3	9972.39	13593.9	16137.2	14469.8	15645.6	10973.9	11934.7	12672.3	14886.3	16580.3	16443.4	11124.6	11570.4	12585.4	15935.5	14355.6	16418.1	12198.7	31.2421	12775.7	15997.8	17616	17097	13037.4	13346	12204.8
[truncated: 24 more columns]

## Sheet: Clustergram
	Displayed	Target	Sample	Normalized Expression
	Yes	AAT	Bacteriocytes	0.00987621
	Yes	AAT	Whole-body	0.017179
	Yes	AQP	Gut	0.00260152
	Yes	AQP	Whole-body	0.000116655
	Yes	ArgH	Bacteriocytes	0.00333764
	Yes	ArgH	Whole-body	0.00114721
	Yes	BCAT	Bacteriocytes	0.659049
	Yes	BCAT	Whole-body	0.145855
	Yes	dapB	Bacteriocytes	0.146097
	Yes	dapB	Whole-body	0.0310864
	Yes	LysA	Bacteriocytes	0.891529
	Yes	LysA	Whole-body	0.0884953
	Yes	SUC1	Gut	0.136901
	Yes	SUC1	Whole-body	0.00515827
	Yes	SUC2	Gut	2.75038
	Yes	SUC2	Whole-body	0.11598

## Sheet: Run Information
File Name	Gene validation.pcrd
Created By User	admin
Notes
ID
Run Started	05/14/2019 11:12:53 UTC
Run Ended	05/14/2019 13:01:30 UTC
Sample Vol	20
Lid Temp	105
Protocol File Name	RT-QPR_Verification.prcl
Plate Setup File Name	Validation_real samples.pltd
Base Serial Number	CT016210
Optical Head Serial Number	785BR12117
CFX Manager Version	3.1.1517.0823.
Protocol
95.0 C for 3:00
95.0 C for 0:15
55.2 C for 0:45
+ Plate Read
GOTO 2, 39 more times
Melt Curve 55.0 to 95.0 C, increment 0.5 C,
0:05 + Plate Read
END
