# Supplementary material for: In silico prediction of candidate gene targets for the management of African cassava whitefly (Bemisia tabaci, SSA1-SG1), a key vector of viruses causing cassava brown streak disease
Source: PeerJ. 2024 Feb 23;12:e16949. doi: 10.7717/peerj.16949 (PMC10896082; doi:10.7717/peerj.16949)
Supplement: Supplemental Information 8 [file peerj-12-16949-s008.xls]

## Sheet: Sheet1
ITEM TO CHECK	IMPORTANCE	CHECKLIST
EXPERIMENTAL DESIGN
Definition of experimental and control groups	E	Manuscript "Validation of selected genes using real-time quantitative PCR section"
Number within each group	E	Manuscript "Validation of selected genes using real-time quantitative PCR section"
Assay carried out by core lab or investigator's lab?	D
Acknowledgement of authors' contributions	D
SAMPLE
Description	E	Manuscript "Validation of selected genes using real-time quantitative PCR section"
Volume/mass of sample processed	D
Microdissection or macrodissection	E	Manuscript "Validation of selected genes using real-time quantitative PCR section"
Processing procedure	E	Manuscript "Validation of selected genes using real-time quantitative PCR section"
If frozen - how and how quickly?	E	Manuscript "Validation of selected genes using real-time quantitative PCR section"
If fixed - with what, how quickly?	E	NA
Sample storage conditions and duration (especially for FFPE samples)	E	NA
NUCLEIC ACID EXTRACTION
Procedure and/or instrumentation	E	Manuscript "Validation of selected genes using real-time quantitative PCR section"
Name of kit and details of any modifications	E	Manuscript "Validation of selected genes using real-time quantitative PCR section"
Source of additional reagents used	D
Details of DNase or RNAse treatment	E	Manuscript "Validation of selected genes using real-time quantitative PCR section"
Contamination assessment (DNA or RNA)	E	Manuscript "Validation of selected genes using real-time quantitative PCR section"
Nucleic acid quantification	E	Manuscript "Validation of selected genes using real-time quantitative PCR section"
Instrument and method	E	Manuscript "Validation of selected genes using real-time quantitative PCR section"
Purity (A260/A280)	D
Yield	D
RNA integrity method/instrument	E	Manuscript "Validation of selected genes using real-time quantitative PCR section"
RIN/RQI or Cq of 3' and 5' transcripts	E	Manuscript "Validation of selected genes using real-time quantitative PCR section"
Electrophoresis traces	D
Inhibition testing (Cq dilutions, spike or other)	E	Manuscript "Validation of selected genes using real-time quantitative PCR section"
REVERSE TRANSCRIPTION
Complete reaction conditions	E	Manuscript "Validation of selected genes using real-time quantitative PCR section"
Amount of RNA and reaction volume	E	Manuscript "Validation of selected genes using real-time quantitative PCR section"
Priming oligonucleotide (if using GSP) and concentration	E	NA
Reverse transcriptase and concentration	E	Manuscript "Validation of selected genes using real-time quantitative PCR section"
Temperature and time	E	Manuscript "Validation of selected genes using real-time quantitative PCR section"
Manufacturer of reagents and catalogue numbers	D
Cqs with and without RT	D*
Storage conditions of cDNA	D
qPCR TARGET INFORMATION
If multiplex, efficiency and LOD of each assay.	E	NA
Sequence accession number	E	NA
Location of amplicon	D
Amplicon length	E	Supplimentary material2 file
In silico specificity screen (BLAST, etc)	E	Supplimentary file "siRNA-finder offtarget predictor results"
Pseudogenes, retropseudogenes or other homologs?	D
Sequence alignment	D
Secondary structure analysis of amplicon	D
Location of each primer by exon or intron (if applicable)	E	NA
What splice variants are targeted?	E	NA
qPCR OLIGONUCLEOTIDES
Primer sequences	E	Supplimentary material2 file
RTPrimerDB Identification Number	D
Probe sequences	D**
Location and identity of any modifications	E	Supplimentary material2 file
Manufacturer of oligonucleotides	D
Purification method	D
qPCR PROTOCOL
Complete reaction conditions	E	Manuscript "Validation of selected genes using real-time quantitative PCR section"
Reaction volume and amount of cDNA/DNA	E	Manuscript "Validation of selected genes using real-time quantitative PCR section"
Primer, (probe), Mg++ and dNTP concentrations	E	Manuscript "Validation of selected genes using real-time quantitative PCR section"
Polymerase identity and concentration	E	Manuscript "Validation of selected genes using real-time quantitative PCR section"
Buffer/kit identity and manufacturer	E	Manuscript "Validation of selected genes using real-time quantitative PCR section"
Exact chemical constitution of the buffer	D
Additives (SYBR Green I, DMSO, etc.)	E	Manuscript "Validation of selected genes using real-time quantitative PCR section"
Manufacturer of plates/tubes and catalog number	D
Complete thermocycling parameters	E	Manuscript "Validation of selected genes using real-time quantitative PCR section"
Reaction setup (manual/robotic)	D
Manufacturer of qPCR instrument	E	Manuscript "Validation of selected genes using real-time quantitative PCR section"
qPCR VALIDATION
Evidence of optimisation (from gradients)	D
Specificity (gel, sequence, melt, or digest)	E	Supplimentary file "siRNA-finder offtarget predictor results"
For SYBR Green I, Cq of the NTC	E	Supplimentary file "Gene validation-Quantification Cq Results"
Standard curves with slope and y-intercept	E	Supplimentary file "Gene validation-Quantification Cq Results"
PCR efficiency calculated from slope	E	Supplimentary file "Gene validation-Quantification Cq Results"
Confidence interval for PCR efficiency or standard error	D
r2 of standard curve	E	Supplimentary file "Gene validation-Quantification Cq Results"
Linear dynamic range	E	Supplimentary file "Gene validation-Quantification Cq Results"
Cq variation at lower limit	E	Supplimentary file "Gene validation-Quantification Cq Results"
Confidence intervals throughout range	D
Evidence for limit of detection	E	Supplimentary file "Gene validation-Quantification Cq Results"
If multiplex, efficiency and LOD of each assay.	E	NA
DATA ANALYSIS
qPCR analysis program (source, version)	E	Manuscript "Validation of selected genes using real-time quantitative PCR section"
Cq method determination	E	Manuscript "Validation of selected genes using real-time quantitative PCR section"
Outlier identification and disposition	E	Supplimentary file "Gene validation-Quantification Cq Results"
Results of NTCs	E	Supplimentary file "Gene validation-Quantification Cq Results"
Justification of number and choice of reference genes	E	Manuscript "Validation of selected genes using real-time quantitative PCR section"
Description of normalisation method	E	Manuscript "Validation of selected genes using real-time quantitative PCR section"
Number and concordance of biological replicates	D
Number and stage (RT or qPCR) of technical replicates	E	Manuscript "Validation of selected genes using real-time quantitative PCR section"
Repeatability (intra-assay variation)	E	Supplimentary file "Gene validation-Quantification Cq Results"
Reproducibility (inter-assay variation, %CV)	D
Power analysis	D
Statistical methods for result significance	E	Manuscript "Validation of selected genes using real-time quantitative PCR section"
Software (source, version)	E	Manuscript "Validation of selected genes using real-time quantitative PCR section"
Cq or raw data submission using RDML	D
Table 1. MIQE checklist for authors, reviewers and editors. All essential information (E) must be submitted with the manuscript. Desirable
information (D) should be submitted if available. If using primers obtained from RTPrimerDB, information on qPCR target, oligonucleotides,
protocols and validation is available from that source.
*: Assessing the absence of DNA using a no RT assay is essential when first extracting RNA. Once the sample has been validated as
RDNA-free, inclusion of a no-RT control is desirable, but no longer essential.
**: Disclosure of the probe sequence is highly desirable and strongly encouraged. However, since not all commercial pre-designed assay
vendors provide this information, it cannot be an essential requirement. Use of such assays is advised against.
